# Supplementary material for: Striking circadian neuron diversity and cycling of Drosophila alternative splicing
Source: eLife journal article supplement (doi:10.7554/elife.35618), 2018-06-04
Supplement: supp [file elife-35618-supp-v1.zip]

Archive with 26 entries (26 files):
- elife_poa_e35618_Figure_6_source_data_1.xlsx
- elife_poa_e35618_Supplementary_File_2.docx
- elife_poa_e35618_Figure_3_figure_supplement_3.pdf
- elife_poa_e35618_Supplementary_File_4.docx
- elife_poa_e35618_Figure_6_figure_supplement_3.pdf
- elife_poa_e35618_Figure_3_source_data_6.xlsx
- elife_poa_e35618_Figure_7_figure_supplement_1.pdf
- elife_poa_e35618_Figure_3_source_data_1.xlsx
- elife_poa_e35618_Figure_3_figure_supplement_2.pdf
- elife_poa_e35618_Supplementary_File_5.docx
- elife_poa_e35618_Figure_3_source_data_3.xlsx
- elife_poa_e35618_Figure_6_figure_supplement_1.pdf
- elife_poa_e35618_Figure_3_source_data_9.xlsx
- elife_poa_e35618_Figure_3_figure_supplement_1.pdf
- elife_poa_e35618_Figure_3_source_data_8.xlsx
- elife_poa_e35618_Transparent_Reporting_File.docx
- elife_poa_e35618_Figure_3_source_data_5.xlsx
- elife_poa_e35618_Figure_6_figure_supplement_2.pdf
- elife_poa_e35618_Figure_1_figure_supplement_1.pdf
- elife_poa_e35618_Supplementary_File_3.docx
- elife_poa_e35618_Figure_1_source_data_1.xlsx
- elife_poa_e35618_Figure_3_source_data_4.xlsx
- elife_poa_e35618_Figure_1_figure_supplement_2.pdf
- elife_poa_e35618_Figure_3_source_data_7.xlsx
- elife_poa_e35618_Figure_3_source_data_2.xlsx
- elife_poa_e35618_Supplementary_File_1.docx
