# Supplementary material for: Striking circadian neuron diversity and cycling of Drosophila alternative splicing
Source: eLife journal article supplement (doi:10.7554/elife.35618), 2018-06-04
Supplement: supp [file elife-35618-supp-v1.zip › elife_poa_e35618_Figure_1_source_data_1.xlsx]

## Sheet: DN1
Chromosome	Strand	Start coordinate	End coordinate
chr2L	+	10007178	10007250
chr2L	+	10007178	10007253
chr2L	+	10009536	10010735
chr2L	+	10010557	10010735
chr2L	-	10086306	10096912
chr2L	-	10096862	10096912
chr2L	-	1012456	1013239
chr2L	-	1012463	1013239
chr2L	-	1012628	1013535
chr2L	-	1012628	1034138
chr2L	-	1014060	1016220
chr2L	-	10178477	10179435
chr2L	-	10178477	10180105
chr2L	-	10178627	10180105
chr2L	-	10179519	10180105
chr2L	-	10217180	10217339
chr2L	-	10217180	10217351
chr2L	-	10225811	10225872
chr2L	-	10225811	10226663
chr2L	-	10225965	10226663
chr2L	-	10256506	10256908
chr2L	-	10256506	10257393
chr2L	-	10256506	10257776
chr2L	-	10257122	10257393
chr2L	-	10257716	10257776
chr2L	+	10264264	10264547
chr2L	+	10264264	10264550
chr2L	+	10264885	10264945
chr2L	+	10264889	10264945
chr2L	-	10274090	10274163
chr2L	-	10274105	10274163
chr2L	-	10275384	10275447
chr2L	-	10275387	10275447
chr2L	-	1034190	1042962
chr2L	-	1034190	1046808
chr2L	-	1035098	1042962
chr2L	-	1035224	1042962
chr2L	+	10399676	10399766
chr2L	+	10399688	10399766
chr2L	+	10399712	10399766
chr2L	-	1047022	1047856
chr2L	-	1047022	1047944
chr2L	-	1047022	1047954
chr2L	+	10481570	10481620
chr2L	+	10481570	10481645
chr2L	+	10482574	10482623
chr2L	+	10482574	10482635
chr2L	+	10594316	10609522
chr2L	-	10746075	10755902
chr2L	-	10746078	10755902
chr2L	+	108101	108586
chr2L	+	108226	108586
chr2L	+	108346	108586
chr2L	-	10842273	10842379
chr2L	-	10842273	10842383
chr2L	-	1088106	1101919
chr2L	-	1088106	1102321
chr2L	-	10920756	10947971
chr2L	-	10933190	10947971
chr2L	-	10966409	10966500
chr2L	-	10966409	10968436
chr2L	-	10975940	10976141
chr2L	-	10975997	10976141
chr2L	+	10978706	10978878
chr2L	+	10978706	10979631
chr2L	+	10978706	10980443
chr2L	+	10978977	10979631
chr2L	+	10978981	10979631
chr2L	+	10978981	10980443
chr2L	+	10979713	10980443
chr2L	+	10989870	10990094
chr2L	+	10989870	10991057
chr2L	+	10989874	10990094
chr2L	+	10990783	10991057
chr2L	+	10994021	10994324
chr2L	+	10994021	10994847
chr2L	+	10994021	10995842
chr2L	+	10994021	10997333
chr2L	-	1101968	1102321
chr2L	-	11076855	11076925
chr2L	-	11076861	11076925
chr2L	-	11076864	11076925
chr2L	-	11077042	11077121
chr2L	-	11077066	11077121
chr2L	-	11077233	11081152
chr2L	-	11077238	11077519
chr2L	-	11077238	11077634
chr2L	-	11077238	11081152
chr2L	-	11077262	11081152
chr2L	-	11163949	11165562
chr2L	-	11163949	11165601
chr2L	-	11166143	11166688
chr2L	-	11166143	11175159
chr2L	-	1117516	1118564
chr2L	-	1117516	1128127
chr2L	+	11236798	11236928
chr2L	+	11236828	11236928
chr2L	+	11278485	11278573
chr2L	+	11278485	11278753
chr2L	+	11278673	11278753
chr2L	+	1139763	1139827
chr2L	+	1139763	1139830
chr2L	-	1153731	1154280
chr2L	-	1153731	1158077
chr2L	+	1170363	1170417
chr2L	+	1170363	1170428
chr2L	+	1177861	1177946
chr2L	+	1177868	1177946
chr2L	-	11797741	11797827
chr2L	-	11797741	11798663
chr2L	-	11798041	11798663
chr2L	-	11799402	11800153
chr2L	-	11799405	11800153
chr2L	-	11803898	11806046
chr2L	-	11803898	11809124
chr2L	-	11806157	11808012
chr2L	-	11806157	11809124
chr2L	-	11838773	11896209
chr2L	-	11838773	11911684
chr2L	+	12142833	12145068
chr2L	+	12142855	12145068
chr2L	+	12198187	12291207
chr2L	+	12269195	12291207
chr2L	+	12299394	12300359
chr2L	+	12299394	12304444
chr2L	+	12300621	12304444
chr2L	+	12362649	12385560
chr2L	+	12374111	12385560
chr2L	-	12458223	12460587
chr2L	-	12458223	12477113
chr2L	-	12477166	12482559
chr2L	-	12477166	12498523
chr2L	-	12477166	12504077
chr2L	-	12477166	12516482
chr2L	-	12477166	12536273
chr2L	-	12498903	12504077
chr2L	-	12517185	12536273
chr2L	-	12540900	12545641
chr2L	-	12540900	12546408
chr2L	+	12695162	12695303
chr2L	+	12695162	12696265
chr2L	+	12696136	12696265
chr2L	-	12714296	12721449
chr2L	-	12718056	12721449
chr2L	+	12727116	12729929
chr2L	+	12727116	12730841
chr2L	+	12727116	12737396
chr2L	+	12730151	12737957
chr2L	+	12736256	12737957
chr2L	-	13025497	13026527
chr2L	-	13025497	13027343
chr2L	-	13028539	13028866
chr2L	-	13028551	13028866
chr2L	-	13170784	13171311
chr2L	-	13170784	13171380
chr2L	+	13195377	13195579
chr2L	+	13195404	13195579
chr2L	+	13208777	13209434
chr2L	+	13208777	13209470
chr2L	+	13384022	13384655
chr2L	+	13384022	13384982
chr2L	+	13384022	13384985
chr2L	+	13384794	13384982
chr2L	+	13384794	13384985
chr2L	-	13386257	13386486
chr2L	-	13386257	13386528
chr2L	+	13476433	13496589
chr2L	+	13485249	13486916
chr2L	+	13485249	13489469
chr2L	+	13486977	13496589
chr2L	+	13489578	13496589
chr2L	+	13550293	13551140
chr2L	+	13550420	13551140
chr2L	+	13599251	13605478
chr2L	+	13599251	13611343
chr2L	+	13599251	13617593
chr2L	+	13599251	13623120
chr2L	+	13599251	13626016
chr2L	+	13599253	13600396
chr2L	+	13599253	13611343
chr2L	-	1360373	1360490
chr2L	-	1360373	1361456
chr2L	-	1360926	1361456
chr2L	+	13636213	13636382
chr2L	+	13636213	13637286
chr2L	+	13669385	13669543
chr2L	+	13669385	13670436
chr2L	+	13670597	13671413
chr2L	+	13670597	13672137
chr2L	+	14040221	14041319
chr2L	+	14040378	14041319
chr2L	+	14040394	14041319
chr2L	+	14040465	14041319
chr2L	+	14040636	14041319
chr2L	+	14042234	14060956
chr2L	+	14042234	14060959
chr2L	-	14197867	14217025
chr2L	-	14209117	14217025
chr2L	+	14341576	14342776
chr2L	+	14341576	14342851
chr2L	-	145910	145973
chr2L	-	145910	147347
chr2L	-	14600875	14601130
chr2L	-	14600875	14601685
chr2L	-	15067689	15067914
chr2L	-	15067689	15067951
chr2L	+	15092641	15092897
chr2L	+	15092641	15093417
chr2L	+	15093036	15093417
chr2L	+	15093683	15094132
chr2L	+	15093683	15094677
chr2L	+	15094232	15094677
chr2L	+	15252794	15252851
chr2L	+	15252794	15253232
chr2L	-	15257586	15257797
chr2L	-	15257703	15257797
chr2L	-	15258105	15258171
chr2L	-	15258130	15258171
chr2L	+	155429	155544
chr2L	+	155429	155565
chr2L	-	15940082	15961999
chr2L	-	15940082	15962007
chr2L	+	16050272	16056250
chr2L	+	16050710	16056250
chr2L	+	16080196	16080444
chr2L	+	16080196	16080474
chr2L	+	16168612	16169485
chr2L	+	16168648	16169485
chr2L	+	16185626	16186109
chr2L	+	16185626	16187453
chr2L	+	16185626	16189023
chr2L	+	16186151	16189023
chr2L	+	16187840	16189023
chr2L	-	16247384	16247502
chr2L	-	16247384	16248600
chr2L	-	16247764	16248600
chr2L	-	16250158	16251239
chr2L	-	16250158	16251622
chr2L	-	16250158	16257074
chr2L	+	163001	175359
chr2L	+	163001	183759
chr2L	-	16349472	16349985
chr2L	-	16349472	16351925
chr2L	+	1651411	1652773
chr2L	+	1651429	1652773
chr2L	+	1651712	1652773
chr2L	+	16559944	16652741
chr2L	+	16622841	16652741
chr2L	+	16652912	16657497
chr2L	+	16657429	16657497
chr2L	-	16724993	16727008
chr2L	-	16726113	16727008
chr2L	-	16857993	16858620
chr2L	-	1718491	1718673
chr2L	-	1718491	1718694
chr2L	-	17368388	17372563
chr2L	-	17371820	17372563
chr2L	+	17385895	17400394
chr2L	+	17394492	17400394
chr2L	+	17401290	17401514
chr2L	+	17401290	17401517
chr2L	+	17402485	17404059
chr2L	+	17402485	17404728
chr2L	-	17414332	17414527
chr2L	-	17414332	17415279
chr2L	+	175447	183759
chr2L	+	17969518	17971870
chr2L	+	17969518	17972261
chr2L	+	17972003	17972261
chr2L	+	17972018	17972261
chr2L	-	18210145	18210555
chr2L	-	18210148	18210555
chr2L	+	1836652	1837017
chr2L	+	1836652	1837189
chr2L	+	1836652	1842897
chr2L	+	1836776	1837189
chr2L	+	18370656	18381696
chr2L	+	18370656	18391438
chr2L	+	1837406	1842897
chr2L	+	18384893	18386155
chr2L	+	18384893	18387285
chr2L	+	18387317	18388380
chr2L	+	18387317	18392243
chr2L	+	18391364	18392243
chr2L	-	18443070	18443151
chr2L	-	18443073	18443151
chr2L	+	18509706	18511621
chr2L	+	18510058	18511621
chr2L	+	1854308	1855362
chr2L	+	1854308	1855371
chr2L	-	18543715	18546523
chr2L	-	18543715	18565375
chr2L	-	18780331	18782275
chr2L	-	18780331	18792254
chr2L	-	18960680	18962883
chr2L	-	18962791	18962883
chr2L	-	19008543	19008722
chr2L	-	19008543	19008947
chr2L	-	19044303	19044368
chr2L	-	19044317	19044368
chr2L	-	19119241	19119317
chr2L	-	19119241	19120108
chr2L	-	19119474	19120108
chr2L	+	19145844	19166083
chr2L	+	19158755	19166083
chr2L	+	19165988	19166083
chr2L	+	1938619	1938863
chr2L	+	1938619	1941580
chr2L	-	19387769	19387860
chr2L	-	19387769	19388038
chr2L	-	19387936	19388038
chr2L	-	19388569	19389925
chr2L	-	19388569	19389934
chr2L	+	1941393	1941580
chr2L	-	19437126	19437664
chr2L	-	19437126	19441157
chr2L	-	19437845	19438007
chr2L	-	19437845	19441157
chr2L	+	19494498	19494555
chr2L	+	19494498	19494558
chr2L	-	19512980	19513042
chr2L	-	19512983	19513042
chr2L	-	19514350	19514929
chr2L	-	19514852	19514929
chr2L	-	19514859	19514929
chr2L	-	19569226	19571570
chr2L	-	19569226	19577184
chr2L	-	19571767	19577184
chr2L	+	19587086	19600856
chr2L	+	19587376	19600856
chr2L	+	19587527	19600856
chr2L	+	19611626	19644266
chr2L	+	19643372	19644266
chr2L	+	19688250	19709152
chr2L	+	19688250	19726038
chr2L	+	19717454	19719701
chr2L	+	19717454	19725893
chr2L	-	19754280	19755192
chr2L	-	19754280	19755867
chr2L	-	19779330	19779398
chr2L	-	19779333	19779398
chr2L	+	19887320	19907760
chr2L	+	19896323	19901931
chr2L	+	19896328	19901931
chr2L	+	19902187	19907760
chr2L	+	19910432	19925381
chr2L	+	19918585	19925381
chr2L	-	19970240	19970518
chr2L	-	19970461	19970518
chr2L	+	199743	199901
chr2L	+	199743	200118
chr2L	+	199983	200118
chr2L	-	20079472	20084576
chr2L	-	20083015	20084576
chr2L	+	20340112	20343597
chr2L	+	20342481	20343597
chr2L	+	20343286	20343597
chr2L	+	20343338	20343597
chr2L	+	20343947	20344653
chr2L	+	20343947	20345171
chr2L	+	20343947	20345523
chr2L	+	20345259	20345523
chr2L	+	20351286	20353269
chr2L	+	20351286	20354560
chr2L	+	20351286	20361205
chr2L	+	20351286	20363927
chr2L	+	20647788	20648187
chr2L	+	20647788	20648196
chr2L	+	20648013	20648187
chr2L	-	20690061	20692145
chr2L	-	20690061	20692148
chr2L	-	20690061	20692151
chr2L	-	20790720	20791165
chr2L	-	20790720	20791228
chr2L	+	20798514	20813154
chr2L	+	20810373	20813154
chr2L	-	20874432	20875078
chr2L	-	20874432	20875636
chr2L	-	20874432	20876585
chr2L	-	20874432	20876910
chr2L	-	20875724	20876585
chr2L	-	20875724	20876910
chr2L	-	20876616	20876910
chr2L	-	20882464	20885287
chr2L	-	20882464	20903014
chr2L	-	20917120	20917272
chr2L	-	20917120	20918797
chr2L	-	21069607	21071267
chr2L	-	21069607	21071301
chr2L	-	21095412	21095658
chr2L	-	21095412	21099035
chr2L	+	21121739	21122249
chr2L	+	21121769	21122249
chr2L	+	21122389	21122911
chr2L	+	21122389	21124133
chr2L	+	21122927	21124133
chr2L	+	21124373	21124438
chr2L	+	21124373	21124441
chr2L	+	21125439	21126157
chr2L	+	21125439	21127848
chr2L	+	21126374	21127848
chr2L	+	21128062	21128738
chr2L	+	21128062	21128777
chr2L	+	21129082	21130003
chr2L	+	21129082	21132032
chr2L	+	21130286	21132032
chr2L	+	21263123	21263646
chr2L	+	21263179	21263646
chr2L	+	21275806	21279882
chr2L	+	21275806	21281130
chr2L	+	21280447	21281130
chr2L	+	21311017	21311191
chr2L	+	21311032	21311191
chr2L	+	21311032	21311751
chr2L	+	21311531	21311751
chr2L	+	21312043	21312096
chr2L	+	21312043	21312123
chr2L	+	21312208	21318125
chr2L	+	21315538	21318125
chr2L	+	21318416	21318483
chr2L	+	21318419	21318483
chr2L	+	21380361	21381897
chr2L	+	21380361	21382017
chr2L	+	21380361	21382040
chr2L	+	21380361	21382063
chr2L	+	21380365	21382017
chr2L	+	21380478	21382017
chr2L	+	21380600	21382017
chr2L	+	21380728	21382017
chr2L	-	2138158	2138344
chr2L	-	2138158	2139628
chr2L	+	21381668	21382017
chr2L	+	21381788	21382017
chr2L	+	21381832	21381897
chr2L	+	21381832	21382017
chr2L	+	21384595	21385276
chr2L	+	21384595	21385282
chr2L	-	2139673	2139726
chr2L	-	2139676	2139726
chr2L	-	21578529	21578588
chr2L	-	21578529	21578729
chr2L	+	21643252	21643746
chr2L	+	21643252	21643762
chr2L	-	21679393	21679482
chr2L	-	21679402	21679482
chr2L	+	21719643	21720121
chr2L	+	21719643	21720357
chr2L	-	218885	221504
chr2L	-	218885	226114
chr2L	-	2190643	2190705
chr2L	-	2190646	2190705
chr2L	+	22124216	22124780
chr2L	+	22124216	22124785
chr2L	+	22146996	22154796
chr2L	+	22153706	22154796
chr2L	+	22158721	22160188
chr2L	+	22158721	22160206
chr2L	+	22160339	22161676
chr2L	+	22160349	22161676
chr2L	-	22167238	22167301
chr2L	-	22167253	22167301
chr2L	+	22183466	22183526
chr2L	+	22183466	22183606
chr2L	+	22240103	22240152
chr2L	+	22240103	22240168
chr2L	-	22427789	22428347
chr2L	-	22427795	22428347
chr2L	-	22428749	22428845
chr2L	-	22428786	22428845
chr2L	-	22429094	22429351
chr2L	-	22429110	22429267
chr2L	-	22429110	22429351
chr2L	-	22429297	22429351
chr2L	+	22477414	22477472
chr2L	+	22477414	22477475
chr2L	-	22690835	22690904
chr2L	-	22690854	22690904
chr2L	+	22737579	22741700
chr2L	+	22737579	22741944
chr2L	+	22741824	22741944
chr2L	+	22832741	22832803
chr2L	+	22832745	22832803
chr2L	-	229382	229928
chr2L	-	229382	230536
chr2L	-	22960833	22960930
chr2L	-	22960876	22960930
chr2L	-	229977	230536
chr2L	-	231034	231946
chr2L	-	231034	231961
chr2L	-	2361585	2364593
chr2L	-	2361585	2364639
chr2L	-	2361585	2364888
chr2L	-	2361585	2365059
chr2L	+	2400350	2401105
chr2L	+	2400965	2401105
chr2L	-	27490	28013
chr2L	-	27490	28409
chr2L	+	2756143	2756243
chr2L	+	2756170	2756243
chr2L	-	2782839	2783039
chr2L	-	2782940	2783039
chr2L	-	2787162	2792193
chr2L	-	2787168	2789345
chr2L	-	2787168	2792193
chr2L	-	2789946	2792193
chr2L	-	2791304	2792193
chr2L	-	2793264	2793326
chr2L	-	2793270	2793326
chr2L	-	2793908	2798484
chr2L	-	2793908	2799907
chr2L	-	2798836	2799487
chr2L	-	2798836	2799907
chr2L	-	284968	285431
chr2L	-	284968	286305
chr2L	-	284968	290811
chr2L	-	2882833	2882918
chr2L	-	2882833	2884991
chr2L	-	29068	30392
chr2L	-	29068	33843
chr2L	-	29068	34556
chr2L	-	291031	291605
chr2L	-	291031	291659
chr2L	+	2957051	2960688
chr2L	+	2957264	2960688
chr2L	+	2959520	2960688
chr2L	-	2980568	2980634
chr2L	-	2980574	2980634
chr2L	+	2997059	2997490
chr2L	+	2997059	2997789
chr2L	+	2997530	2997789
chr2L	+	3056924	3059603
chr2L	+	3057110	3059603
chr2L	+	306389	317741
chr2L	-	3081268	3089833
chr2L	-	3081268	3094215
chr2L	+	310605	317741
chr2L	-	33270	33843
chr2L	-	33270	34556
chr2L	-	3361443	3362997
chr2L	-	3362718	3362997
chr2L	-	3367719	3367902
chr2L	-	3367719	3372777
chr2L	-	3421698	3422758
chr2L	-	3421698	3426484
chr2L	-	34288	34556
chr2L	+	343729	344022
chr2L	+	343729	344040
chr2L	+	344489	344553
chr2L	+	344489	344574
chr2L	-	34912	38533
chr2L	-	3506756	3507187
chr2L	-	3506756	3507194
chr2L	-	35212	38533
chr2L	+	3723764	3724882
chr2L	+	3723764	3725654
chr2L	+	3723764	3726677
chr2L	+	3725196	3725654
chr2L	+	3725196	3726677
chr2L	+	3725196	3726695
chr2L	+	3725901	3726677
chr2L	+	3759154	3759667
chr2L	+	3759154	3760066
chr2L	+	3759806	3760066
chr2L	+	3760517	3760691
chr2L	+	3760553	3760691
chr2L	+	3763151	3763647
chr2L	+	3763205	3763647
chr2L	+	3803730	3806967
chr2L	+	3806821	3806967
chr2L	-	3883981	3888267
chr2L	-	3887799	3893260
chr2L	-	3889784	3893260
chr2L	-	3911336	3914726
chr2L	-	3911336	3916779
chr2L	-	3915096	3916779
chr2L	-	3915099	3916779
chr2L	-	39857	58079
chr2L	-	39857	65344
chr2L	+	4107804	4113296
chr2L	+	4107804	4113619
chr2L	+	4113344	4113619
chr2L	-	4190824	4192631
chr2L	-	4190824	4193308
chr2L	-	4192968	4193308
chr2L	+	420146	420290
chr2L	+	420230	420290
chr2L	+	4227749	4228010
chr2L	+	4227956	4228010
chr2L	+	4299177	4299261
chr2L	+	4299177	4303334
chr2L	+	4299189	4303334
chr2L	+	4304841	4305347
chr2L	+	4304841	4307189
chr2L	+	4305423	4307189
chr2L	+	4314615	4318575
chr2L	+	4314615	4318592
chr2L	+	4318708	4318905
chr2L	+	4318708	4318946
chr2L	-	4455738	4455855
chr2L	-	4455738	4456112
chr2L	-	4456075	4456384
chr2L	-	4456332	4456384
chr2L	-	4458057	4458161
chr2L	-	4458057	4458287
chr2L	+	457562	457613
chr2L	+	457562	457626
chr2L	+	475851	475914
chr2L	+	475851	476001
chr2L	+	486494	533886
chr2L	+	4872693	4873816
chr2L	+	4872693	4873870
chr2L	+	4874169	4874540
chr2L	+	4874169	4874885
chr2L	+	4874562	4874885
chr2L	-	4879196	4880292
chr2L	-	4879196	4880376
chr2L	-	4882492	4882863
chr2L	-	4882492	4882887
chr2L	+	492041	533886
chr2L	+	492041	533889
chr2L	+	492041	533892
chr2L	-	4948559	4948896
chr2L	-	4948771	4948896
chr2L	+	4987240	4987905
chr2L	+	4987318	4987905
chr2L	+	4988848	4989388
chr2L	+	4988848	4990306
chr2L	+	4989410	4990306
chr2L	-	4994994	4999223
chr2L	-	4994994	5004170
chr2L	-	5004207	5004612
chr2L	-	5004207	5008179
chr2L	-	5042887	5042959
chr2L	-	5042890	5042959
chr2L	-	5042890	5042982
chr2L	+	5043383	5044305
chr2L	+	5043383	5044321
chr2L	+	5043383	5044581
chr2L	+	5043383	5045820
chr2L	+	5044689	5045820
chr2L	+	5045483	5045820
chr2L	+	5063210	5066868
chr2L	+	5064581	5066868
chr2L	+	5068394	5069125
chr2L	+	5068394	5070095
chr2L	+	5069219	5070095
chr2L	+	5127057	5139357
chr2L	+	5139015	5139357
chr2L	+	5144785	5146991
chr2L	+	5146703	5146991
chr2L	+	5202302	5202763
chr2L	+	5202302	5203114
chr2L	+	5202803	5203114
chr2L	+	5203742	5204449
chr2L	+	5203742	5204461
chr2L	+	5204592	5204834
chr2L	+	5204592	5204873
chr2L	-	5219107	5228765
chr2L	-	5221650	5236334
chr2L	-	5221650	5241367
chr2L	+	5327286	5327501
chr2L	+	5327350	5327501
chr2L	-	5540300	5540423
chr2L	-	5540300	5540970
chr2L	+	5710916	5712236
chr2L	+	5711051	5712236
chr2L	+	5712149	5712236
chr2L	-	5734823	5734884
chr2L	-	5734823	5735058
chr2L	-	5763368	5765959
chr2L	-	5764271	5765959
chr2L	-	58182	59188
chr2L	-	58182	65344
chr2L	+	5851826	5852882
chr2L	+	5851826	5852991
chr2L	+	5852898	5852991
chr2L	+	5856318	5856381
chr2L	+	5856318	5856402
chr2L	+	5944445	5946042
chr2L	+	5944862	5946042
chr2L	+	5947332	5947486
chr2L	+	5947332	5947855
chr2L	+	5947332	5948405
chr2L	-	5979704	5979938
chr2L	-	5979704	5979958
chr2L	-	5979704	5980949
chr2L	-	5979704	5980951
chr2L	+	5985220	5985337
chr2L	+	5985220	5985341
chr2L	+	6101798	6121772
chr2L	+	6113113	6121772
chr2L	+	6122410	6122696
chr2L	+	6122410	6122976
chr2L	+	6122853	6122976
chr2L	+	6339125	6342156
chr2L	+	6341886	6342156
chr2L	+	6457916	6458085
chr2L	+	6457916	6458169
chr2L	+	6458095	6458169
chr2L	-	6568865	6574014
chr2L	-	6572542	6573697
chr2L	-	6572542	6574014
chr2L	-	6573805	6574014
chr2L	-	6640203	6640355
chr2L	-	6640215	6640355
chr2L	-	6646947	6647919
chr2L	-	6646947	6649028
chr2L	-	6678224	6678910
chr2L	-	6678224	6679984
chr2L	-	6678756	6678910
chr2L	-	6678933	6679984
chr2L	-	6679262	6679984
chr2L	-	6680524	6680669
chr2L	-	6680524	6680945
chr2L	-	6680542	6680669
chr2L	-	6680542	6680945
chr2L	-	6680706	6680945
chr2L	+	6777734	6777794
chr2L	+	6777734	6777797
chr2L	-	6791841	6793226
chr2L	-	6791841	6796335
chr2L	+	6920861	6922729
chr2L	+	6920861	6923782
chr2L	+	6921073	6922729
chr2L	+	6921440	6922729
chr2L	+	6922826	6923782
chr2L	-	6987003	6997487
chr2L	-	7032177	7032309
chr2L	-	7032177	7032320
chr2L	+	7033018	7034197
chr2L	+	7033018	7035073
chr2L	+	7033018	7035405
chr2L	+	7041159	7051365
chr2L	+	7049725	7051365
chr2L	+	7184203	7184384
chr2L	+	7184203	7184613
chr2L	+	7184394	7184613
chr2L	-	7196857	7203933
chr2L	-	7196857	7203937
chr2L	-	7223697	7225604
chr2L	-	7223697	7227102
chr2L	-	7225061	7225604
chr2L	-	7225856	7227102
chr2L	+	72977	74901
chr2L	+	73692	73818
chr2L	+	73692	74901
chr2L	+	73897	74901
chr2L	+	7437788	7443582
chr2L	+	7440031	7443582
chr2L	+	7440101	7443582
chr2L	+	7440331	7443582
chr2L	+	7440958	7443582
chr2L	+	7440962	7443582
chr2L	+	74572	74901
chr2L	-	7501525	7529200
chr2L	-	7501525	7536273
chr2L	-	7644774	7644922
chr2L	-	7644786	7644922
chr2L	-	7646010	7648745
chr2L	-	7647266	7648745
chr2L	-	7647509	7648745
chr2L	-	7651743	7655052
chr2L	-	7651743	7655543
chr2L	-	7655221	7655543
chr2L	-	7697157	7698723
chr2L	-	7698130	7698723
chr2L	+	7773658	7774199
chr2L	+	7773658	7774223
chr2L	-	7786424	7786699
chr2L	-	7786424	7786988
chr2L	-	7804915	7805058
chr2L	-	7804918	7805058
chr2L	-	7826336	7826532
chr2L	-	7826336	7826768
chr2L	+	8030839	8032058
chr2L	+	8031308	8032058
chr2L	+	8036298	8036356
chr2L	+	8036298	8036380
chr2L	+	8036576	8036835
chr2L	+	8036576	8037088
chr2L	+	8036893	8037088
chr2L	-	8042613	8042690
chr2L	-	8042613	8042821
chr2L	+	8083457	8089183
chr2L	+	8083521	8089183
chr2L	+	8083521	8089392
chr2L	+	8083587	8089183
chr2L	+	8083636	8089183
chr2L	+	8083686	8089183
chr2L	+	8083943	8089183
chr2L	+	8088453	8089183
chr2L	+	8088453	8089392
chr2L	+	8089736	8102298
chr2L	+	8089736	8105690
chr2L	+	8103503	8105690
chr2L	+	8107880	8109814
chr2L	+	8107880	8110479
chr2L	+	8110216	8110479
chr2L	-	8140778	8156519
chr2L	-	8140778	8159217
chr2L	+	8183706	8184813
chr2L	+	8183706	8186115
chr2L	+	8185278	8186115
chr2L	+	8200280	8200344
chr2L	+	8200280	8200349
chr2L	+	8213260	8213335
chr2L	+	8213282	8213335
chr2L	-	8218679	8218852
chr2L	-	8218679	8219114
chr2L	-	8218871	8219114
chr2L	+	824137	824189
chr2L	+	824137	824217
chr2L	+	826507	826647
chr2L	+	826507	829303
chr2L	+	826507	829455
chr2L	+	826507	830736
chr2L	+	830349	830736
chr2L	+	8304577	8304660
chr2L	+	8304577	8304842
chr2L	+	8304772	8304842
chr2L	+	8369030	8369714
chr2L	+	8369030	8369797
chr2L	+	8377623	8377845
chr2L	+	8377793	8377845
chr2L	+	8384895	8384995
chr2L	+	8384895	8386215
chr2L	+	8385097	8386215
chr2L	+	8386385	8386473
chr2L	+	8386385	8386482
chr2L	+	8386385	8386485
chr2L	+	8428067	8428318
chr2L	+	8428067	8430279
chr2L	+	8429462	8430279
chr2L	-	8493092	8493742
chr2L	-	8493092	8493745
chr2L	-	8506706	8506791
chr2L	-	8506706	8506800
chr2L	+	8543674	8544542
chr2L	+	8543715	8544542
chr2L	+	8661487	8662437
chr2L	+	8661487	8662455
chr2L	+	8663251	8664156
chr2L	+	8663251	8665444
chr2L	+	8663251	8666034
chr2L	+	8664220	8664373
chr2L	+	8664220	8665444
chr2L	+	8665518	8666034
chr2L	-	8690252	8698847
chr2L	-	8690252	8704359
chr2L	+	870552	871339
chr2L	+	871274	871339
chr2L	-	8713370	8714122
chr2L	-	8713370	8740383
chr2L	+	9162708	9163139
chr2L	+	9162708	9163293
chr2L	+	9176380	9177123
chr2L	+	9176461	9177123
chr2L	+	9256696	9256891
chr2L	+	9256696	9272464
chr2L	+	9257206	9272464
chr2L	+	9519479	9519718
chr2L	+	9519534	9519718
chr2L	+	953510	956076
chr2L	+	953510	956247
chr2L	-	9556398	9560086
chr2L	-	9556398	9565002
chr2L	-	9556398	9566431
chr2L	-	9556398	9566539
chr2L	+	956792	956858
chr2L	+	956792	956863
chr2L	-	9714153	9724075
chr2L	-	9714153	9743476
chr2L	-	9718520	9720089
chr2L	-	9718520	9722759
chr2L	-	9719269	9722759
chr2L	-	9720165	9722759
chr2L	-	9722942	9727026
chr2L	-	9722954	9727026
chr2L	-	9722954	9727134
chr2L	-	9727256	9732914
chr2L	-	9727256	9732953
chr2L	-	9744226	9746405
chr2L	-	9744230	9746405
chr2L	-	9744230	9746432
chr2L	-	9798305	9802349
chr2L	-	9798305	9806442
chr2L	-	9802437	9807308
chr2L	-	9806530	9807308
chr2L	-	9815101	9817578
chr2L	-	9815101	9822284
chr2L	-	9815101	9839274
chr2L	-	9815101	9840150
chr2L	-	9815101	9875788
chr2L	-	9815912	9819285
chr2L	-	9815912	9825295
chr2L	-	9819331	9825611
chr2L	-	9825341	9825611
chr2L	-	9825752	9869530
chr2L	-	9854878	9869530
chr2L	-	9877260	9885930
chr2L	-	9877260	9885936
chr2L	-	9877972	9885724
chr2L	-	9878025	9885724
chr2L	-	9878025	9885930
chr2L	-	9905083	9905873
chr2L	-	9905291	9905873
chr2LHet	+	167315	167374
chr2LHet	+	167315	167382
chr2LHet	-	21373	21434
chr2LHet	-	21383	21434
chr2LHet	-	21569	32571
chr2LHet	-	25147	25334
chr2LHet	-	25147	32571
chr2LHet	-	25390	32571
chr2R	+	10058227	10059793
chr2R	+	10058956	10059793
chr2R	+	10064196	10064678
chr2R	+	10064196	10065388
chr2R	+	10064982	10065388
chr2R	+	10065705	10065775
chr2R	+	10065708	10065775
chr2R	+	10066546	10066612
chr2R	+	10066546	10066615
chr2R	-	1009157	1009486
chr2R	-	1009157	1015729
chr2R	-	1009345	1009486
chr2R	-	10103615	10103937
chr2R	-	10103615	10104033
chr2R	-	10119469	10120219
chr2R	-	10119469	10120228
chr2R	-	10121847	10121946
chr2R	-	10121847	10122196
chr2R	-	10122064	10122196
chr2R	+	10163911	10164784
chr2R	+	10163933	10164784
chr2R	+	10164031	10164784
chr2R	+	10164560	10164784
chr2R	+	10167147	10168898
chr2R	+	10167147	10173205
chr2R	+	10179687	10179732
chr2R	+	10179687	10179747
chr2R	+	10179886	10181596
chr2R	+	10179886	10184204
chr2R	+	10181693	10184204
chr2R	+	1035939	1035993
chr2R	+	1035939	1035996
chr2R	+	10394854	10394919
chr2R	+	10394854	10395043
chr2R	-	10631697	10632701
chr2R	-	10632642	10632701
chr2R	-	10641395	10641454
chr2R	-	10641395	10641490
chr2R	-	10650513	10651334
chr2R	-	10650579	10651334
chr2R	+	10658334	10659303
chr2R	+	10659147	10659303
chr2R	-	10791069	10791134
chr2R	-	10791069	10791576
chr2R	-	10834108	10834207
chr2R	-	10834108	10834682
chr2R	-	10834324	10835145
chr2R	-	10834805	10835145
chr2R	-	10836929	10839138
chr2R	-	10836929	10848889
chr2R	-	10841160	10845721
chr2R	-	10841160	10845747
chr2R	+	10851430	10859233
chr2R	+	10853504	10859233
chr2R	+	10864978	10865190
chr2R	+	10864978	10865733
chr2R	+	10865428	10865733
chr2R	+	11027600	11027881
chr2R	+	11027600	11027974
chr2R	+	11043720	11068016
chr2R	+	11052144	11068016
chr2R	+	11052605	11068016
chr2R	+	11053074	11068016
chr2R	-	11152481	11152726
chr2R	-	11152481	11153134
chr2R	-	11152865	11153134
chr2R	-	11155889	11157036
chr2R	-	11155889	11157801
chr2R	-	11157262	11157801
chr2R	-	11159044	11159621
chr2R	-	11159044	11160055
chr2R	-	11159044	11161723
chr2R	-	11159044	11162042
chr2R	-	11159661	11160055
chr2R	-	11160113	11160829
chr2R	-	11160113	11161723
chr2R	-	11160113	11162042
chr2R	-	11160893	11162042
chr2R	-	11161799	11162042
chr2R	-	11167429	11167825
chr2R	-	11167429	11168410
chr2R	-	11167853	11168410
chr2R	-	11172471	11174857
chr2R	-	11172471	11180276
chr2R	-	11174915	11180276
chr2R	+	11199472	11199536
chr2R	+	11199472	11199539
chr2R	+	11210217	11210952
chr2R	+	11210246	11210952
chr2R	+	11311910	11340360
chr2R	+	11314132	11340360
chr2R	+	11340513	11341244
chr2R	+	11340513	11343938
chr2R	+	11341302	11343938
chr2R	+	11344320	11345251
chr2R	+	11344320	11346402
chr2R	+	11344320	11348376
chr2R	+	11344320	11351974
chr2R	+	11346772	11351974
chr2R	+	11346772	11352861
chr2R	+	11348731	11351974
chr2R	+	11352191	11352834
chr2R	+	11352191	11352861
chr2R	+	11352996	11353153
chr2R	+	11353011	11353153
chr2R	-	11409445	11409505
chr2R	-	11409448	11409505
chr2R	-	11455218	11455332
chr2R	-	11455218	11455655
chr2R	-	11455345	11455655
chr2R	-	11772993	11773088
chr2R	-	11772993	11773602
chr2R	-	11773161	11773602
chr2R	-	11824085	11824524
chr2R	-	11824085	11825618
chr2R	-	11824085	11825950
chr2R	-	11824088	11824524
chr2R	-	11824088	11825618
chr2R	-	11824088	11825950
chr2R	-	11825384	11825618
chr2R	-	11825384	11825950
chr2R	+	1182562	1182619
chr2R	+	1182565	1182619
chr2R	+	1182568	1182619
chr2R	-	11825772	11825950
chr2R	-	11883819	11884398
chr2R	-	11883870	11884398
chr2R	-	11887475	11887598
chr2R	-	11887475	11888691
chr2R	-	11914768	11914840
chr2R	-	11914783	11914840
chr2R	+	11919681	11925555
chr2R	+	11919939	11925555
chr2R	-	11973125	11973548
chr2R	-	11973125	11974434
chr2R	+	11990397	11991114
chr2R	+	11990454	11991114
chr2R	+	11990454	11992536
chr2R	+	11991279	11992536
chr2R	+	12020595	12023530
chr2R	+	12021188	12023530
chr2R	+	12066457	12069484
chr2R	+	12067440	12069484
chr2R	+	12084077	12084195
chr2R	+	12084107	12084195
chr2R	-	12093584	12097693
chr2R	-	12093584	12108626
chr2R	-	12214665	12216056
chr2R	-	12214665	12220537
chr2R	-	12216155	12216920
chr2R	-	12216419	12216920
chr2R	-	12217903	12220537
chr2R	-	12220925	12221283
chr2R	-	12220925	12223993
chr2R	+	12310253	12310517
chr2R	+	12310253	12310520
chr2R	+	12316327	12316834
chr2R	+	12316327	12317082
chr2R	+	12316967	12317082
chr2R	-	123841	123916
chr2R	-	123867	123916
chr2R	+	12495839	12506307
chr2R	+	12496830	12506307
chr2R	+	12496968	12506307
chr2R	+	12497800	12506307
chr2R	+	12500078	12506307
chr2R	+	12505581	12506307
chr2R	+	12505648	12506307
chr2R	+	12505648	12506312
chr2R	+	12505695	12506307
chr2R	+	12505961	12506307
chr2R	-	12522408	12525141
chr2R	-	12522408	12525151
chr2R	+	12529197	12529555
chr2R	+	12529197	12530446
chr2R	+	12529701	12530446
chr2R	+	12531161	12531559
chr2R	+	12531161	12532249
chr2R	+	12531161	12538316
chr2R	+	12531599	12532249
chr2R	+	12532962	12533160
chr2R	+	12532962	12533164
chr2R	+	12534610	12538316
chr2R	-	12544944	12546250
chr2R	-	12544944	12551018
chr2R	-	12641657	12641746
chr2R	-	12641657	12643390
chr2R	-	12641774	12643390
chr2R	-	12643955	12644059
chr2R	-	12643955	12644068
chr2R	-	12645907	12646126
chr2R	-	12645907	12646755
chr2R	-	12646334	12646755
chr2R	-	12648219	12648909
chr2R	-	12648219	12649171
chr2R	-	12648952	12649171
chr2R	-	12650845	12651641
chr2R	-	12650845	12659757
chr2R	-	12650845	12659761
chr2R	-	12651879	12652831
chr2R	-	12651879	12653336
chr2R	-	12653146	12653336
chr2R	+	12677420	12677659
chr2R	+	12677420	12678242
chr2R	+	12677771	12678242
chr2R	-	12752538	12752595
chr2R	-	12752541	12752595
chr2R	+	12812295	12813849
chr2R	+	12812482	12813849
chr2R	+	12812542	12813849
chr2R	+	12813250	12813849
chr2R	+	12820083	12827596
chr2R	+	12824035	12827596
chr2R	+	12861629	12867350
chr2R	+	12861629	12871769
chr2R	+	12867400	12871769
chr2R	+	12874255	12879154
chr2R	+	12874255	12881663
chr2R	+	12879167	12881663
chr2R	-	12898040	12898390
chr2R	-	12898040	12898657
chr2R	-	12898481	12898657
chr2R	-	12900213	12900788
chr2R	-	12900279	12900788
chr2R	-	12902707	12903162
chr2R	-	12902707	12903166
chr2R	+	12938669	12939325
chr2R	+	12938669	12940772
chr2R	+	12940649	12940772
chr2R	+	13104580	13107558
chr2R	+	13107608	13162913
chr2R	+	13153716	13162913
chr2R	+	13163568	13220079
chr2R	+	13163568	13238597
chr2R	+	13239810	13241682
chr2R	+	13239810	13248616
chr2R	+	13239810	13249483
chr2R	+	13248632	13249483
chr2R	+	13249602	13260580
chr2R	+	13249602	13261321
chr2R	+	13259788	13260580
chr2R	+	13260666	13261321
chr2R	+	13345377	13349497
chr2R	+	13346134	13349497
chr2R	-	13408433	13409209
chr2R	-	13408433	13409335
chr2R	-	13409405	13410356
chr2R	-	13409405	13411003
chr2R	-	13410465	13411003
chr2R	-	13411076	13411587
chr2R	-	13411403	13411587
chr2R	-	13413918	13414337
chr2R	-	13413921	13414337
chr2R	-	13415610	13415816
chr2R	-	13415610	13417485
chr2R	-	13415610	13418550
chr2R	-	13416696	13417485
chr2R	-	13417639	13418550
chr2R	+	13460538	13460599
chr2R	+	13460538	13460606
chr2R	+	13557137	13557190
chr2R	+	13557137	13557646
chr2R	+	13588919	13589099
chr2R	+	13588919	13589337
chr2R	+	13589154	13589337
chr2R	+	13685366	13685428
chr2R	+	13685366	13685431
chr2R	+	13727294	13727938
chr2R	+	13727294	13728251
chr2R	+	13728004	13728251
chr2R	-	13755064	13755286
chr2R	-	13755064	13755790
chr2R	-	13755593	13755790
chr2R	+	13791184	13795150
chr2R	+	13791184	13795165
chr2R	+	13800384	13801592
chr2R	+	13800384	13801604
chr2R	+	13982728	13983785
chr2R	+	13983563	13983785
chr2R	-	14007905	14007970
chr2R	-	14007908	14007970
chr2R	-	14018550	14018639
chr2R	-	14018550	14018785
chr2R	-	14018694	14018785
chr2R	+	14028429	14033512
chr2R	+	14028572	14033438
chr2R	+	14032779	14032845
chr2R	+	14032783	14032845
chr2R	+	14033143	14033512
chr2R	-	14043670	14045349
chr2R	-	14043670	14045445
chr2R	-	14043670	14045476
chr2R	-	14064569	14065083
chr2R	-	14065003	14065083
chr2R	-	14177355	14243003
chr2R	-	14193640	14243003
chr2R	-	14243560	14244595
chr2R	-	14243560	14244641
chr2R	-	14243560	14244714
chr2R	+	14309058	14311372
chr2R	+	14309058	14311630
chr2R	+	14311376	14311472
chr2R	+	14311376	14311630
chr2R	+	14311512	14311630
chr2R	+	14311991	14312110
chr2R	+	14311991	14312375
chr2R	+	14312171	14312375
chr2R	+	14312539	14312843
chr2R	+	14312581	14312843
chr2R	-	14345103	14345398
chr2R	-	14345103	14348069
chr2R	-	14345103	14348415
chr2R	-	14345659	14348069
chr2R	-	14345975	14348069
chr2R	-	14348149	14348415
chr2R	-	14520488	14520557
chr2R	-	14520491	14520557
chr2R	-	14520629	14520695
chr2R	-	14520632	14520695
chr2R	+	14575873	14579544
chr2R	+	14576016	14579544
chr2R	+	14576246	14579544
chr2R	+	14578411	14579544
chr2R	+	14578521	14579544
chr2R	-	14616251	14616346
chr2R	-	14616291	14616346
chr2R	+	14708788	14708993
chr2R	+	14708788	14708996
chr2R	+	14708788	14709479
chr2R	-	14859268	14859332
chr2R	-	14859280	14859332
chr2R	-	1491916	1491971
chr2R	-	1491916	1492020
chr2R	-	1492021	1492086
chr2R	-	1492021	1492213
chr2R	-	1492155	1492213
chr2R	+	15025766	15026644
chr2R	+	15025766	15027197
chr2R	+	15026854	15027197
chr2R	+	15046857	15047286
chr2R	+	15046857	15047298
chr2R	+	15047540	15047683
chr2R	+	15047540	15047752
chr2R	+	15048920	15048976
chr2R	+	15048920	15048979
chr2R	+	15060393	15060935
chr2R	+	15060426	15060935
chr2R	+	15061626	15061842
chr2R	+	15061626	15062080
chr2R	+	15061870	15062080
chr2R	+	15062591	15063691
chr2R	+	15062591	15063751
chr2R	+	15062591	15063769
chr2R	+	15062753	15063691
chr2R	+	15062753	15063751
chr2R	+	15062753	15063769
chr2R	+	15062813	15063691
chr2R	+	15062813	15063751
chr2R	+	15062813	15063769
chr2R	+	15064248	15064444
chr2R	+	15064248	15065322
chr2R	+	15065078	15065322
chr2R	+	15105699	15108247
chr2R	+	15105699	15110743
chr2R	+	15108287	15110743
chr2R	+	15124568	15124831
chr2R	+	15124568	15125655
chr2R	+	15124946	15125655
chr2R	+	15125276	15125655
chr2R	+	15125939	15128719
chr2R	+	15125939	15129677
chr2R	+	15125939	15130207
chr2R	+	15129290	15129677
chr2R	+	15129290	15130207
chr2R	+	15129900	15129987
chr2R	+	15129900	15130207
chr2R	+	15130090	15130207
chr2R	-	15286598	15293523
chr2R	-	15286598	15294118
chr2R	-	15286598	15295344
chr2R	-	15293593	15295344
chr2R	+	15329994	15330121
chr2R	+	15330061	15330121
chr2R	+	15330603	15330663
chr2R	+	15330603	15330816
chr2R	+	15330744	15330816
chr2R	-	15332884	15333222
chr2R	-	15332884	15333431
chr2R	+	15344480	15347298
chr2R	+	15344978	15347298
chr2R	+	15348121	15358100
chr2R	+	15355146	15356293
chr2R	+	15355418	15356293
chr2R	+	15357843	15358100
chr2R	+	15359241	15360322
chr2R	+	15359250	15359543
chr2R	+	15359250	15360322
chr2R	+	15360669	15360943
chr2R	+	15360684	15360943
chr2R	+	15361472	15362031
chr2R	+	15361472	15362034
chr2R	+	15361472	15365137
chr2R	+	15361472	15366255
chr2R	+	15362146	15365137
chr2R	+	15362146	15365164
chr2R	+	15362146	15366255
chr2R	+	15366370	15368654
chr2R	+	15366370	15370455
chr2R	-	15418205	15419673
chr2R	-	15418205	15419679
chr2R	-	15425716	15433515
chr2R	-	15425716	15451944
chr2R	-	15425716	15451965
chr2R	-	15425716	15461506
chr2R	-	15433564	15451944
chr2R	-	15433564	15451965
chr2R	-	15452017	15461491
chr2R	-	15452017	15461506
chr2R	-	15461831	15488385
chr2R	-	15476248	15488385
chr2R	-	15516575	15517706
chr2R	-	15516575	15517987
chr2R	-	15516575	15518356
chr2R	-	15516575	15518540
chr2R	-	15591134	15591206
chr2R	-	15591137	15591206
chr2R	+	15599955	15600013
chr2R	+	15599958	15600013
chr2R	+	1589721	1590370
chr2R	+	1589798	1590370
chr2R	-	16143314	16143389
chr2R	-	16143314	16143586
chr2R	-	16143540	16143939
chr2R	-	16143740	16143939
chr2R	+	16211916	16212001
chr2R	+	16211916	16212351
chr2R	+	16214898	16215370
chr2R	+	16214898	16215830
chr2R	+	16215639	16215830
chr2R	+	16312161	16316907
chr2R	+	16316722	16316907
chr2R	+	16317281	16346991
chr2R	+	16319368	16346991
chr2R	+	16357625	16357917
chr2R	+	16357625	16359044
chr2R	+	16359480	16359577
chr2R	+	16359489	16359577
chr2R	+	16475249	16477120
chr2R	+	16475249	16483060
chr2R	+	16477172	16483060
chr2R	+	16483319	16485051
chr2R	+	16483319	16485956
chr2R	+	16485096	16485956
chr2R	+	16486199	16492199
chr2R	+	16490653	16492199
chr2R	+	16493356	16493947
chr2R	+	16493381	16493947
chr2R	+	16528623	16528672
chr2R	+	16528623	16528684
chr2R	-	16552573	16552867
chr2R	-	16552573	16554422
chr2R	+	16599274	16631681
chr2R	+	16600914	16631681
chr2R	+	16621444	16631681
chr2R	+	16621444	16637187
chr2R	+	16909026	16909389
chr2R	+	16909026	16910568
chr2R	+	16909638	16910937
chr2R	+	16910670	16910937
chr2R	+	16911091	16911165
chr2R	+	16911091	16911479
chr2R	+	16911259	16911479
chr2R	+	1692959	1719850
chr2R	+	1692959	1734096
chr2R	+	16964644	16972701
chr2R	+	16972203	16972701
chr2R	-	17041671	17042047
chr2R	-	17041671	17042218
chr2R	-	17044802	17045718
chr2R	-	17044802	17047932
chr2R	+	17063178	17067441
chr2R	+	17067101	17067441
chr2R	+	17067149	17067441
chr2R	+	17067652	17068923
chr2R	+	17068856	17068923
chr2R	+	17166330	17166486
chr2R	+	17166330	17167302
chr2R	+	17181294	17181353
chr2R	+	17181294	17181557
chr2R	+	17181379	17181554
chr2R	+	17181379	17181557
chr2R	+	17181383	17181557
chr2R	+	1719882	1734096
chr2R	+	17213152	17213693
chr2R	+	17213152	17214922
chr2R	-	17282550	17286390
chr2R	-	17282550	17286678
chr2R	-	17299923	17304383
chr2R	-	17299923	17367594
chr2R	-	17348864	17367594
chr2R	+	17389984	17394798
chr2R	+	17389984	17394825
chr2R	+	17389984	17397609
chr2R	+	17389984	17397621
chr2R	+	17389984	17398370
chr2R	+	17395227	17397621
chr2R	+	17397706	17398370
chr2R	+	17399682	17401020
chr2R	+	17399682	17401712
chr2R	+	17399682	17403391
chr2R	+	1741291	1743018
chr2R	+	1741306	1743018
chr2R	-	17493698	17493971
chr2R	-	17493865	17493971
chr2R	+	17540068	17540416
chr2R	+	17540068	17540722
chr2R	+	17540068	17541146
chr2R	+	17540068	17542278
chr2R	+	17541568	17542278
chr2R	+	17545614	17545849
chr2R	+	17545614	17545854
chr2R	+	17545685	17545849
chr2R	+	17545685	17545854
chr2R	+	17545780	17545849
chr2R	+	17569965	17570884
chr2R	+	17569965	17570890
chr2R	-	17586105	17590176
chr2R	-	17586105	17590180
chr2R	-	17586105	17591826
chr2R	+	17967710	17968578
chr2R	+	17968043	17968578
chr2R	-	17979564	17979645
chr2R	-	17979567	17979645
chr2R	-	17979778	17982027
chr2R	-	17980222	17982027
chr2R	-	17996285	17996354
chr2R	-	17996285	17997090
chr2R	-	17997528	17997691
chr2R	-	17997528	17997709
chr2R	-	18188514	18195711
chr2R	-	18188514	18199199
chr2R	-	18195761	18199199
chr2R	-	18223297	18226304
chr2R	-	18225417	18226304
chr2R	-	18232798	18233547
chr2R	-	18232798	18234151
chr2R	-	18233864	18234151
chr2R	-	18234214	18241891
chr2R	-	18234214	18247757
chr2R	-	18387241	18400314
chr2R	-	18387241	18422348
chr2R	-	18646910	18647267
chr2R	-	18646910	18664526
chr2R	-	18648093	18664526
chr2R	-	1867142	1867204
chr2R	-	1867142	1867546
chr2R	+	18761159	18761349
chr2R	+	18761169	18761349
chr2R	+	18764370	18764423
chr2R	+	18764370	18764435
chr2R	+	18767493	18767999
chr2R	+	18767565	18767654
chr2R	+	18767565	18767999
chr2R	+	18767741	18767999
chr2R	+	18774771	18774828
chr2R	+	18774771	18774831
chr2R	+	18815152	18816609
chr2R	+	18815152	18817320
chr2R	+	18817842	18819036
chr2R	+	18818803	18819036
chr2R	+	1897006	1897301
chr2R	+	1897006	1897882
chr2R	+	1897329	1897882
chr2R	-	19270645	19270841
chr2R	-	19270645	19270886
chr2R	-	19281003	19282438
chr2R	-	19281003	19283950
chr2R	-	19300656	19301054
chr2R	-	19300656	19302018
chr2R	-	19301893	19302018
chr2R	+	19545537	19552815
chr2R	+	19548056	19552815
chr2R	+	19595997	19596151
chr2R	+	19595997	19596156
chr2R	+	19596010	19596151
chr2R	+	19596010	19596156
chr2R	-	1968539	1969239
chr2R	-	1968920	1969239
chr2R	-	19699247	19699316
chr2R	-	19699260	19699316
chr2R	-	1971512	1971672
chr2R	-	1971512	1972011
chr2R	-	1971895	1972011
chr2R	-	1972524	1972589
chr2R	-	1972536	1972589
chr2R	-	19748980	19749782
chr2R	-	19748980	19750011
chr2R	-	19748983	19749782
chr2R	+	19797332	19799198
chr2R	+	19797356	19799198
chr2R	+	19799074	19799198
chr2R	+	19810552	19810861
chr2R	+	19810552	19811523
chr2R	+	19810552	19811937
chr2R	+	19810916	19811523
chr2R	+	19811617	19811937
chr2R	-	1982576	2010385
chr2R	-	1982576	2039333
chr2R	-	19834863	19835137
chr2R	-	19834863	19836010
chr2R	-	19835164	19835873
chr2R	-	19835175	19835873
chr2R	-	19835718	19835873
chr2R	-	19835920	19836010
chr2R	-	19875077	19875139
chr2R	-	19875077	19875635
chr2R	-	19875198	19875635
chr2R	+	19914139	19914279
chr2R	+	19914139	19914297
chr2R	+	19914139	19914525
chr2R	+	19921943	19922209
chr2R	+	19921955	19922209
chr2R	+	19945425	19946005
chr2R	+	19945429	19946005
chr2R	-	19953836	19954082
chr2R	-	19953836	19954684
chr2R	-	19954239	19954684
chr2R	+	19957765	19958289
chr2R	+	19957765	19959512
chr2R	+	19958527	19960226
chr2R	+	19959747	19960226
chr2R	+	20007129	20007417
chr2R	+	20007129	20008233
chr2R	+	20007777	20008233
chr2R	+	20027384	20043325
chr2R	+	20042565	20043325
chr2R	-	20046608	20046666
chr2R	-	20046608	20046670
chr2R	-	20269379	20270711
chr2R	-	20269379	20270762
chr2R	-	20272571	20277115
chr2R	-	20272571	20277119
chr2R	-	20286706	20287367
chr2R	-	20286706	20287721
chr2R	-	20287414	20287721
chr2R	-	2040055	2043661
chr2R	-	2040055	2056259
chr2R	+	20419159	20419961
chr2R	+	20419257	20419961
chr2R	+	20419901	20419961
chr2R	+	20443094	20443805
chr2R	+	20443094	20445551
chr2R	+	20445222	20445551
chr2R	+	20461193	20461273
chr2R	+	20461193	20461337
chr2R	+	20461280	20461337
chr2R	-	20503722	20508223
chr2R	-	20559829	20560072
chr2R	-	20559829	20562494
chr2R	-	20614682	20614801
chr2R	-	20614682	20624025
chr2R	-	20614682	20624135
chr2R	-	20673206	20673257
chr2R	-	20673206	20673263
chr2R	-	20763182	20763286
chr2R	+	20779215	20779923
chr2R	+	20779243	20779923
chr2R	+	20779360	20779805
chr2R	+	20779360	20779923
chr2R	-	20791112	20791219
chr2R	+	20802985	20803252
chr2R	+	20802985	20804293
chr2R	+	20803354	20804841
chr2R	+	20804413	20804841
chr2R	-	20817493	20821579
chr2R	-	20818684	20821579
chr2R	+	20826365	20826477
chr2R	+	20826365	20826495
chr2R	-	20867184	20870544
chr2R	-	20867184	20870548
chr2R	-	20867184	20870550
chr2R	-	20878795	20879086
chr2R	-	20878795	20879331
chr2R	-	20879221	20879331
chr2R	-	20898139	20898833
chr2R	-	20898139	20898897
chr2R	+	20925053	20925223
chr2R	+	20925053	20926572
chr2R	+	20925487	20926572
chr2R	+	20925493	20926572
chr2R	-	20960726	20960799
chr2R	-	20960737	20960799
chr2R	-	2098330	2099099
chr2R	-	2098360	2099099
chr2R	-	210220	210279
chr2R	+	2102256	2120769
chr2R	-	210239	210279
chr2R	+	2108781	2120769
chr2R	-	2519645	2519809
chr2R	-	2519645	2519827
chr2R	-	2519645	2520498
chr2R	+	2549941	2550072
chr2R	+	2549953	2550072
chr2R	+	2556729	2556833
chr2R	+	2556737	2556833
chr2R	+	2563417	2579201
chr2R	+	2576518	2579201
chr2R	+	2579139	2579201
chr2R	-	2583336	2583395
chr2R	-	2583348	2583395
chr2R	+	2631044	2631096
chr2R	+	2631049	2631096
chr2R	+	2640493	2640730
chr2R	+	2640493	2641683
chr2R	+	2640493	2642205
chr2R	+	2641008	2642205
chr2R	+	2641008	2642208
chr2R	+	2641943	2642205
chr2R	+	2641943	2642208
chr2R	-	2684917	2686128
chr2R	-	2684917	2686273
chr2R	+	2701258	2701540
chr2R	+	2701258	2702563
chr2R	+	2716010	2717064
chr2R	+	2716172	2717064
chr2R	+	2716172	2717067
chr2R	+	2720436	2721118
chr2R	+	2720822	2721118
chr2R	-	2751038	2751781
chr2R	-	2751059	2751781
chr2R	-	2764031	2764099
chr2R	-	2764031	2764724
chr2R	-	2764238	2764724
chr2R	-	2764627	2764724
chr2R	-	2814326	2814893
chr2R	-	2814326	2816012
chr2R	-	2815656	2816012
chr2R	-	2816341	2816576
chr2R	-	2816341	2817326
chr2R	-	2816341	2817752
chr2R	-	2816778	2817326
chr2R	-	2817603	2817752
chr2R	-	2817875	2819346
chr2R	-	2817875	2820627
chr2R	-	2820148	2820627
chr2R	-	2821685	2821852
chr2R	-	2821685	2822309
chr2R	-	2821868	2822309
chr2R	-	2826848	2850383
chr2R	-	2832932	2850383
chr2R	-	2834284	2845821
chr2R	-	2839052	2845821
chr2R	-	2866102	2872915
chr2R	-	2870254	2872915
chr2R	+	2875770	2876074
chr2R	+	2875770	2876086
chr2R	-	3208269	3208870
chr2R	-	3208269	3209886
chr2R	-	3209154	3209886
chr2R	-	3209154	3210063
chr2R	-	3209902	3210063
chr2R	-	3210837	3211322
chr2R	-	3210837	3212073
chr2R	-	3210837	3212085
chr2R	-	3211473	3212085
chr2R	-	3212242	3213655
chr2R	-	3212242	3214120
chr2R	-	3213869	3216792
chr2R	-	3214289	3216792
chr2R	-	3236480	3237661
chr2R	-	3236480	3241069
chr2R	-	3236480	3242794
chr2R	-	3236480	3243610
chr2R	-	3236480	3244476
chr2R	-	3236480	3244686
chr2R	-	3236480	3244903
chr2R	-	3236480	3246310
chr2R	-	3236480	3247170
chr2R	-	3236480	3247585
chr2R	-	3236480	3248029
chr2R	-	3239544	3249221
chr2R	-	3244811	3249221
chr2R	-	3248154	3249221
chr2R	-	3249372	3250527
chr2R	-	3249372	3251098
chr2R	-	3249372	3251681
chr2R	-	3249372	3252235
chr2R	-	3249372	3252815
chr2R	-	3249372	3254308
chr2R	-	3250699	3255891
chr2R	-	3251270	3255891
chr2R	-	3251853	3255891
chr2R	-	3252122	3255891
chr2R	-	3354555	3354986
chr2R	-	3354821	3354977
chr2R	-	3354821	3354986
chr2R	-	3355331	3355925
chr2R	-	3355331	3356613
chr2R	-	3356042	3356863
chr2R	-	3356730	3356863
chr2R	-	3361348	3361508
chr2R	-	3361348	3362075
chr2R	-	3361348	3362845
chr2R	-	3362882	3362943
chr2R	-	3362885	3362943
chr2R	-	3415481	3416531
chr2R	-	3415481	3420256
chr2R	-	3493749	3501437
chr2R	-	3493749	3507836
chr2R	-	3507944	3508074
chr2R	-	3507944	3508108
chr2R	-	3607501	3609537
chr2R	-	3607501	3613192
chr2R	-	3617213	3617882
chr2R	-	3617213	3622657
chr2R	-	3617213	3622880
chr2R	-	3629425	3632383
chr2R	-	3629425	3645538
chr2R	-	3692443	3692925
chr2R	-	3692443	3693729
chr2R	-	3836025	3841405
chr2R	-	3839546	3841405
chr2R	-	3898050	3898274
chr2R	-	3898050	3898417
chr2R	-	3954798	3954846
chr2R	-	3954798	3954911
chr2R	+	3963607	3963796
chr2R	+	3963613	3963796
chr2R	+	3963953	3964763
chr2R	+	3963953	3965234
chr2R	+	3964797	3965234
chr2R	-	4003220	4003635
chr2R	-	4003530	4003635
chr2R	-	4004525	4004668
chr2R	-	4004609	4004668
chr2R	+	4020580	4020641
chr2R	+	4020580	4020644
chr2R	-	4024584	4037598
chr2R	-	4024598	4037598
chr2R	-	4024649	4037598
chr2R	-	4024911	4037598
chr2R	-	4025187	4026441
chr2R	-	4026097	4026441
chr2R	-	4028118	4028184
chr2R	-	4028121	4028184
chr2R	-	4030579	4033258
chr2R	-	4030579	4043558
chr2R	-	4030579	4043917
chr2R	-	4030661	4037598
chr2R	-	4032693	4037598
chr2R	-	4033746	4037598
chr2R	-	4033781	4037598
chr2R	+	4281242	4282066
chr2R	+	4281242	4282069
chr2R	+	4281242	4282534
chr2R	+	4282124	4282534
chr2R	+	4282619	4282714
chr2R	+	4282625	4282714
chr2R	+	4282864	4282938
chr2R	+	4282871	4282938
chr2R	+	4502754	4502910
chr2R	+	4502768	4502910
chr2R	+	4503508	4503830
chr2R	+	4503583	4503830
chr2R	+	4505966	4506022
chr2R	+	4505966	4506034
chr2R	-	4607289	4607346
chr2R	-	4607289	4607358
chr2R	-	4619316	4619425
chr2R	-	4619316	4619663
chr2R	-	4619468	4619663
chr2R	-	4620385	4620805
chr2R	-	4620385	4621295
chr2R	+	4761959	4762171
chr2R	+	4761959	4762213
chr2R	+	4783348	4783454
chr2R	+	4783348	4783457
chr2R	-	4786817	4786870
chr2R	-	4786820	4786870
chr2R	+	4789027	4789640
chr2R	+	4789027	4789831
chr2R	-	4806968	4807027
chr2R	-	4806971	4807027
chr2R	+	4842356	4843216
chr2R	+	4842356	4844532
chr2R	-	4938656	4944076
chr2R	-	4938656	4946758
chr2R	-	4944137	4946758
chr2R	+	5003956	5004681
chr2R	+	5004356	5004681
chr2R	+	5006552	5007803
chr2R	+	5006552	5009239
chr2R	-	5011650	5012247
chr2R	-	5011650	5013054
chr2R	-	5012725	5013054
chr2R	+	5026773	5026857
chr2R	+	5026773	5027483
chr2R	+	5027803	5028941
chr2R	+	5028866	5028941
chr2R	-	5030741	5030896
chr2R	-	5030741	5031123
chr2R	-	5030900	5031123
chr2R	-	5118153	5118609
chr2R	-	5118153	5119251
chr2R	-	5118685	5119251
chr2R	-	5238678	5238912
chr2R	-	5238678	5238944
chr2R	-	5238678	5238965
chr2R	-	5238678	5239045
chr2R	-	5238995	5239045
chr2R	-	5288653	5289912
chr2R	-	5289739	5289912
chr2R	+	5311771	5311832
chr2R	+	5311771	5311835
chr2R	+	5320733	5321710
chr2R	+	5320733	5321857
chr2R	-	5325237	5328205
chr2R	-	5325237	5328695
chr2R	+	5362709	5362812
chr2R	+	5362709	5363604
chr2R	+	5362930	5363604
chr2R	+	5395758	5396430
chr2R	+	5395758	5397391
chr2R	+	5396675	5397391
chr2R	+	5398704	5410441
chr2R	+	5398704	5414791
chr2R	+	5405077	5414791
chr2R	+	5416132	5416474
chr2R	+	5416132	5417593
chr2R	+	5416138	5417593
chr2R	+	5416508	5417593
chr2R	+	5417711	5418403
chr2R	+	5417711	5419849
chr2R	-	5463889	5465193
chr2R	-	5463889	5465688
chr2R	+	5467292	5467466
chr2R	+	5467341	5467466
chr2R	+	5474733	5474950
chr2R	+	5474843	5474950
chr2R	+	5475196	5475280
chr2R	+	5475211	5475280
chr2R	-	5503008	5545097
chr2R	-	5512281	5545097
chr2R	-	5530981	5545097
chr2R	-	5541556	5545097
chr2R	+	560564	560617
chr2R	+	560567	560617
chr2R	-	5700169	5706500
chr2R	-	5700169	5707343
chr2R	-	5706513	5707343
chr2R	-	5717364	5720982
chr2R	-	5717364	5723946
chr2R	-	5773485	5773703
chr2R	-	5773485	5774434
chr2R	-	5788656	5790668
chr2R	-	5788659	5790668
chr2R	-	5803386	5808022
chr2R	-	5804396	5804960
chr2R	-	5804396	5805441
chr2R	-	5805036	5805441
chr2R	-	5807252	5808022
chr2R	-	5809508	5816403
chr2R	-	5809508	5821822
chr2R	-	5809508	5828248
chr2R	-	5821882	5828248
chr2R	-	5887420	5888328
chr2R	-	5887420	5892660
chr2R	-	5911707	5913332
chr2R	-	5911707	5913353
chr2R	-	5911802	5913332
chr2R	-	5911802	5913353
chr2R	+	5937149	5937204
chr2R	+	5937149	5937256
chr2R	+	5937404	5937463
chr2R	+	5937409	5937463
chr2R	+	5937409	5937469
chr2R	+	5972927	5978046
chr2R	+	5975109	5978046
chr2R	+	5975273	5978046
chr2R	+	5978304	5979260
chr2R	+	5978304	5980647
chr2R	+	5979501	5980647
chr2R	+	5987243	5991759
chr2R	+	5987355	5991759
chr2R	+	5988602	5991759
chr2R	+	5988930	5991759
chr2R	+	5992321	5992444
chr2R	+	5992335	5992444
chr2R	+	5993330	5993444
chr2R	+	5993330	5993792
chr2R	+	6005373	6005535
chr2R	+	6005404	6005535
chr2R	-	6009950	6010013
chr2R	-	6009963	6010013
chr2R	+	6016197	6016287
chr2R	+	6016197	6016326
chr2R	-	6038542	6040407
chr2R	-	6038557	6040407
chr2R	-	6096769	6096943
chr2R	-	6096775	6096943
chr2R	-	6137332	6137872
chr2R	-	6137332	6138382
chr2R	-	6138091	6138382
chr2R	-	6138649	6139431
chr2R	-	6138718	6139431
chr2R	-	6139489	6139578
chr2R	-	6139489	6139785
chr2R	-	616056	616282
chr2R	-	616056	616310
chr2R	-	616056	616317
chr2R	+	6182471	6182794
chr2R	+	6182471	6183245
chr2R	+	6182828	6183245
chr2R	+	6183082	6183245
chr2R	+	6183552	6192100
chr2R	+	6183552	6192127
chr2R	-	6213399	6213865
chr2R	-	6213399	6216361
chr2R	-	6214043	6216286
chr2R	-	6214043	6216361
chr2R	-	6219872	6221136
chr2R	-	6219872	6222399
chr2R	-	6221449	6222399
chr2R	-	6227707	6245018
chr2R	-	6227707	6275637
chr2R	-	6227707	6299739
chr2R	+	6322095	6322149
chr2R	+	6322095	6322155
chr2R	+	6325611	6326878
chr2R	+	6325801	6326878
chr2R	+	6327136	6335702
chr2R	+	6333129	6335702
chr2R	-	6358254	6358717
chr2R	-	6358254	6358943
chr2R	-	6358778	6359121
chr2R	-	6359010	6359121
chr2R	+	637018	637068
chr2R	+	637018	642003
chr2R	-	6376648	6376865
chr2R	-	6376648	6419542
chr2R	-	6378556	6419542
chr2R	-	6384275	6426775
chr2R	-	6384312	6426769
chr2R	-	6384324	6426775
chr2R	-	6387832	6426775
chr2R	-	6388764	6426775
chr2R	-	6389967	6419542
chr2R	-	6394197	6426772
chr2R	-	6394197	6426775
chr2R	-	6395282	6426775
chr2R	-	6397641	6419542
chr2R	-	6398853	6426775
chr2R	-	6399865	6426775
chr2R	-	6401193	6426775
chr2R	-	6403556	6406704
chr2R	-	6403556	6419542
chr2R	-	6403671	6426775
chr2R	-	6406047	6426772
chr2R	-	6406047	6426775
chr2R	-	6406880	6419542
chr2R	-	6406955	6426769
chr2R	-	6407490	6426775
chr2R	-	6409132	6426775
chr2R	-	6409474	6426772
chr2R	+	640968	642003
chr2R	-	6410474	6419542
chr2R	-	6410949	6426775
chr2R	-	6413367	6419542
chr2R	-	6414724	6419542
chr2R	-	6415054	6426775
chr2R	-	6415167	6426772
chr2R	-	6415515	6426775
chr2R	-	6416499	6426775
chr2R	-	6417089	6426775
chr2R	-	6421473	6422353
chr2R	-	6421473	6428848
chr2R	-	6421473	6430408
chr2R	-	6422046	6426775
chr2R	-	6424470	6426775
chr2R	-	6426235	6426772
chr2R	+	6449695	6467830
chr2R	+	6449695	6498053
chr2R	+	6457647	6498053
chr2R	+	6501631	6502036
chr2R	+	6501631	6502051
[truncated: 5,115 more rows]

## Sheet: LNd
Chromosome	Strand	Start coordinate	End coordinate
chr2L	+	10007178	10007250
chr2L	+	10007178	10007253
chr2L	+	10009536	10010735
chr2L	+	10009677	10010735
chr2L	+	10010557	10010735
chr2L	-	10086306	10096912
chr2L	-	10096862	10096912
chr2L	-	1012730	1019500
chr2L	-	1012730	1019523
chr2L	-	1014060	1016220
chr2L	-	10178477	10179435
chr2L	-	10178477	10179953
chr2L	-	10178477	10180105
chr2L	-	10178477	10180215
chr2L	-	10179519	10180105
chr2L	-	10217180	10217339
chr2L	-	10217180	10217351
chr2L	-	10225811	10225872
chr2L	-	10225811	10226663
chr2L	-	10225965	10226663
chr2L	+	10232659	10233479
chr2L	+	10232659	10233755
chr2L	+	10233561	10233755
chr2L	-	10256506	10256908
chr2L	-	10256506	10257393
chr2L	-	10256506	10257776
chr2L	-	10257122	10257393
chr2L	-	10257716	10257776
chr2L	+	10264264	10264547
chr2L	+	10264264	10264550
chr2L	+	10264885	10264945
chr2L	+	10264889	10264945
chr2L	-	10274090	10274163
chr2L	-	10274105	10274163
chr2L	-	10276567	10277393
chr2L	-	10276567	10277812
chr2L	+	10315957	10316045
chr2L	+	10315957	10316190
chr2L	+	10340811	10340852
chr2L	+	10340811	10340865
chr2L	-	1034190	1042962
chr2L	-	1034190	1046808
chr2L	+	10376553	10377246
chr2L	+	10376884	10377236
chr2L	+	10376884	10377246
chr2L	+	10399688	10399766
chr2L	+	10399712	10399766
chr2L	+	10408386	10408737
chr2L	+	10408386	10409709
chr2L	+	10408621	10408737
chr2L	+	10459280	10459382
chr2L	+	10459280	10459660
chr2L	+	10459517	10459878
chr2L	+	10459795	10459878
chr2L	+	10481570	10481620
chr2L	+	10481570	10481628
chr2L	+	10481570	10481645
chr2L	+	10482574	10482623
chr2L	+	10482574	10482635
chr2L	+	10530669	10530854
chr2L	+	10530675	10530854
chr2L	+	10546300	10606251
chr2L	+	10546300	10619878
chr2L	-	10693114	10693146
chr2L	-	10693114	10693269
chr2L	-	10693114	10693593
chr2L	-	10693147	10693563
chr2L	-	10693189	10693332
chr2L	-	10693189	10693593
chr2L	-	10693195	10693419
chr2L	-	10693195	10693434
chr2L	-	10693195	10693737
chr2L	-	10693195	10693986
chr2L	-	10693333	10693542
chr2L	-	10693354	10693383
chr2L	-	10693357	10693434
chr2L	-	10693363	10693383
chr2L	-	10693420	10693542
chr2L	-	10693489	10693593
chr2L	-	10693525	10693563
chr2L	-	10693525	10693593
chr2L	-	10746075	10755902
chr2L	-	10746078	10755902
chr2L	+	107838	108586
chr2L	+	108101	108586
chr2L	+	108226	108586
chr2L	-	1088106	1101919
chr2L	-	1088106	1102321
chr2L	-	10920756	10947971
chr2L	-	10934626	10947971
chr2L	-	10966409	10966500
chr2L	-	10966409	10968436
chr2L	+	10978706	10978878
chr2L	+	10978706	10980443
chr2L	+	10978981	10979631
chr2L	+	10978981	10980443
chr2L	+	10979713	10980443
chr2L	+	10989870	10991057
chr2L	+	10990783	10991057
chr2L	+	10994021	10994847
chr2L	+	10994021	10995842
chr2L	+	10994021	10997333
chr2L	-	1101968	1102321
chr2L	-	11076855	11076925
chr2L	-	11076861	11076925
chr2L	-	11076864	11076925
chr2L	-	11077233	11081152
chr2L	-	11077238	11077339
chr2L	-	11077238	11080574
chr2L	-	11077238	11081152
chr2L	-	11077262	11081152
chr2L	+	110877	111003
chr2L	+	110877	111905
chr2L	+	11109507	11110103
chr2L	+	11109507	11110157
chr2L	+	111117	112688
chr2L	-	11142415	11142774
chr2L	-	11142415	11142947
chr2L	-	11142884	11142947
chr2L	-	11166143	11166688
chr2L	-	11166143	11175159
chr2L	-	1116690	1117442
chr2L	-	1117379	1117442
chr2L	-	1117516	1118564
chr2L	-	1117516	1128127
chr2L	+	112019	112688
chr2L	+	11210725	11211766
chr2L	+	11210747	11211766
chr2L	+	11210941	11211766
chr2L	+	11210988	11211766
chr2L	+	11225884	11235273
chr2L	+	11225884	11235280
chr2L	+	11278485	11278573
chr2L	+	11278485	11278753
chr2L	+	11278673	11278753
chr2L	+	1139763	1139827
chr2L	+	1139763	1139830
chr2L	+	114991	155565
chr2L	-	1153731	1154280
chr2L	-	1153731	1158077
chr2L	+	1158782	1158865
chr2L	+	1158810	1158865
chr2L	+	1170363	1170417
chr2L	+	1170363	1170428
chr2L	+	1177191	1177254
chr2L	-	117759	117818
chr2L	-	117775	117818
chr2L	+	1177861	1177946
chr2L	+	1177868	1177946
chr2L	-	11803898	11804402
chr2L	-	11803898	11806046
chr2L	-	11803898	11808012
chr2L	-	11806157	11808012
chr2L	-	11806157	11809124
chr2L	+	1182104	1182168
chr2L	-	11838773	11911684
chr2L	-	11875559	11911684
chr2L	+	1192198	1192254
chr2L	+	1192198	1192266
chr2L	+	12142833	12145068
chr2L	+	12142873	12145068
chr2L	+	12201771	12271589
chr2L	+	12241780	12271589
chr2L	+	12299394	12300359
chr2L	+	12299394	12304444
chr2L	+	12300621	12304444
chr2L	-	12404119	12407183
chr2L	-	12404177	12407183
chr2L	-	12458223	12460587
chr2L	-	12458223	12477113
chr2L	-	12477166	12482559
chr2L	-	12477166	12498523
chr2L	-	12477166	12504077
chr2L	-	12477166	12516482
chr2L	-	12477166	12536273
chr2L	-	12498903	12504077
chr2L	-	12517185	12536273
chr2L	-	12540900	12545641
chr2L	-	12540900	12546408
chr2L	-	12714296	12721449
chr2L	-	12718056	12721449
chr2L	+	12730151	12737957
chr2L	+	12736256	12737957
chr2L	-	13018174	13018788
chr2L	-	13018177	13018788
chr2L	+	13195377	13195579
chr2L	+	13195404	13195579
chr2L	+	13208777	13209434
chr2L	+	13208777	13209470
chr2L	-	13310264	13330797
chr2L	-	13320480	13330797
chr2L	-	13354648	13354940
chr2L	-	13354749	13354940
chr2L	+	13384022	13384655
chr2L	+	13384022	13384982
chr2L	+	13384794	13384982
chr2L	+	13384794	13384985
chr2L	-	13386257	13386486
chr2L	-	13386257	13386528
chr2L	-	13445397	13445454
chr2L	-	13445397	13445478
chr2L	+	13476433	13496589
chr2L	+	13489578	13496589
chr2L	-	13513470	13534905
chr2L	-	13513473	13534905
chr2L	-	13547161	13549130
chr2L	-	13547303	13549130
chr2L	+	13550293	13551140
chr2L	+	13550420	13551140
chr2L	+	13556031	13565185
chr2L	+	13599251	13611343
chr2L	+	13599251	13617593
chr2L	+	13599251	13623120
chr2L	+	13599251	13626016
chr2L	+	13599253	13611343
chr2L	-	13775047	13775253
chr2L	-	13775185	13775253
chr2L	+	13964738	13964792
chr2L	+	13964738	13964795
chr2L	+	14017026	14018033
chr2L	+	14017037	14018033
chr2L	+	14040221	14041319
chr2L	+	14040378	14041319
chr2L	+	14040394	14041319
chr2L	+	14040465	14041319
chr2L	+	14040636	14041319
chr2L	+	14088861	14089106
chr2L	+	14088861	14089859
chr2L	-	14197867	14217025
chr2L	-	14209117	14217025
chr2L	+	14615643	14616050
chr2L	+	14615643	14616214
chr2L	+	14615643	14616301
chr2L	+	15092641	15092897
chr2L	+	15092641	15093417
chr2L	+	15093683	15094132
chr2L	+	15093683	15094677
chr2L	+	15252794	15252851
chr2L	+	15252794	15253232
chr2L	-	15257586	15257797
chr2L	-	15257703	15257797
chr2L	-	15258105	15258167
chr2L	-	15258105	15258171
chr2L	+	155429	155544
chr2L	+	155429	155565
chr2L	+	1555205	1556538
chr2L	+	1555211	1556538
chr2L	-	15908278	15939362
chr2L	-	15908278	15961999
chr2L	-	15940082	15961999
chr2L	-	15940082	15962007
chr2L	+	160023	162590
chr2L	+	161375	162590
chr2L	+	16168515	16169516
chr2L	+	16168604	16169485
chr2L	+	16168612	16169485
chr2L	+	16168618	16169485
chr2L	+	16168648	16169379
chr2L	+	16168648	16169485
chr2L	+	16168648	16169516
chr2L	+	16185626	16186109
chr2L	+	16185626	16187453
chr2L	+	16185626	16189023
chr2L	+	16186151	16189023
chr2L	+	16187840	16189023
chr2L	-	16247384	16247502
chr2L	-	16247384	16248600
chr2L	-	16247764	16248600
chr2L	-	16250158	16251239
chr2L	-	16250158	16251622
chr2L	-	16250158	16257074
chr2L	-	16405955	16448312
chr2L	-	16416089	16448312
chr2L	+	1651429	1652773
chr2L	+	1651712	1652773
chr2L	+	16680276	16680448
chr2L	+	16680276	16690900
chr2L	+	16685941	16690900
chr2L	+	16696762	16697499
chr2L	+	16696769	16697499
chr2L	+	16719976	16722007
chr2L	+	16720168	16722007
chr2L	-	16727488	16727628
chr2L	-	16857993	16858620
chr2L	+	16973265	16973446
chr2L	+	16973311	16973414
chr2L	+	16973311	16973446
chr2L	-	1718491	1718673
chr2L	-	1718491	1718694
chr2L	-	1718491	1718738
chr2L	-	17368388	17372563
chr2L	-	17371820	17372563
chr2L	+	17389530	17394428
chr2L	+	17389530	17400394
chr2L	+	17394492	17400394
chr2L	+	17401290	17401514
chr2L	+	17401290	17401517
chr2L	+	17401581	17402373
chr2L	+	17401581	17404059
chr2L	+	17402485	17404059
chr2L	+	17402485	17404728
chr2L	-	17414332	17414527
chr2L	-	17414332	17415279
chr2L	-	17420113	17432856
chr2L	-	17431709	17432856
chr2L	-	17432787	17432856
chr2L	-	17651491	17655667
chr2L	-	17655032	17655667
chr2L	+	18120072	18123347
chr2L	+	18120077	18123347
chr2L	+	18120204	18123347
chr2L	+	18122588	18123347
chr2L	+	1836652	1837017
chr2L	+	1836652	1837189
chr2L	+	1836652	1842897
chr2L	+	1836783	1837189
chr2L	+	18370656	18381696
chr2L	+	1837406	1842897
chr2L	-	18443070	18443151
chr2L	-	18443073	18443151
chr2L	+	1854308	1855362
chr2L	+	1854308	1855371
chr2L	-	18543715	18546523
chr2L	-	18543715	18565375
chr2L	+	1855475	1855614
chr2L	+	1855475	1856428
chr2L	+	1855797	1856428
chr2L	+	18617294	18631741
chr2L	+	18617724	18631741
chr2L	+	18845493	18845598
chr2L	+	18845493	18845612
chr2L	+	18845565	18845612
chr2L	-	18858462	18858950
chr2L	-	18858519	18858950
chr2L	-	19008539	19008947
chr2L	-	19008543	19008722
chr2L	-	19008543	19008947
chr2L	-	19031241	19031291
chr2L	-	19031241	19031294
chr2L	-	19044083	19044143
chr2L	-	19044083	19044152
chr2L	-	19119241	19119317
chr2L	-	19119241	19120108
chr2L	-	19119474	19120108
chr2L	-	19383762	19383879
chr2L	-	19383762	19385778
chr2L	-	19385363	19385668
chr2L	-	19385363	19385778
chr2L	-	19385705	19385778
chr2L	+	1938619	1938863
chr2L	+	1938619	1941580
chr2L	-	19387769	19387860
chr2L	-	19387769	19388038
chr2L	-	19387936	19388038
chr2L	-	19388569	19389426
chr2L	-	19388569	19389925
chr2L	-	19388569	19389934
chr2L	-	19393656	19398333
chr2L	-	19393656	19398345
chr2L	-	19393656	19398349
chr2L	+	1941393	1941580
chr2L	-	19514350	19514929
chr2L	-	19514852	19514929
chr2L	-	19514859	19514929
chr2L	+	19530189	19530888
chr2L	+	19530189	19530912
chr2L	-	19569226	19571570
chr2L	-	19569226	19572498
chr2L	-	19569226	19577184
chr2L	-	19571767	19572498
chr2L	-	19571767	19577184
chr2L	+	19587086	19600856
chr2L	+	19587527	19600856
chr2L	+	19600931	19610608
chr2L	+	19600931	19611302
chr2L	+	19607081	19610608
chr2L	+	19611626	19644266
chr2L	+	19643372	19644266
chr2L	+	19688250	19709152
chr2L	+	19688250	19726038
chr2L	-	19793402	19794581
chr2L	-	19794308	19794581
chr2L	+	19896323	19901931
chr2L	+	19896323	19901964
chr2L	+	19910432	19925381
chr2L	+	19918585	19923284
chr2L	+	19918585	19925381
chr2L	+	19965010	19965061
chr2L	+	19965010	19965078
chr2L	-	19967510	19967564
chr2L	-	19967510	19967572
chr2L	+	199743	199901
chr2L	+	199743	200118
chr2L	+	199983	200118
chr2L	-	20074128	20074189
chr2L	-	20074128	20074769
chr2L	-	20074336	20074769
chr2L	-	20079472	20084576
chr2L	-	20083015	20084576
chr2L	+	20336549	20339057
chr2L	+	20336549	20339243
chr2L	+	20339088	20339243
chr2L	+	20340112	20343597
chr2L	+	20342481	20343597
chr2L	+	20343947	20344653
chr2L	+	20343947	20345171
chr2L	+	20351286	20353269
chr2L	+	20360812	20361967
chr2L	+	20360812	20364295
chr2L	+	20362826	20364295
chr2L	-	20387592	20399090
chr2L	-	20387592	20414332
chr2L	-	20413774	20414332
chr2L	-	20690061	20692145
chr2L	-	20690061	20692151
chr2L	-	20790720	20791165
chr2L	-	20790720	20791228
chr2L	+	20798514	20813154
chr2L	+	20810373	20813154
chr2L	-	20874432	20875636
chr2L	-	20874432	20876585
chr2L	-	20874432	20876910
chr2L	-	20875724	20876910
chr2L	-	20876616	20876910
chr2L	-	20882464	20885287
chr2L	-	20882464	20903014
chr2L	-	20917120	20918797
chr2L	-	20917120	20918872
chr2L	+	21105008	21114592
chr2L	+	21108227	21114592
chr2L	+	21121739	21122249
chr2L	+	21121769	21122249
chr2L	+	21122389	21122911
chr2L	+	21122389	21124133
chr2L	+	21122927	21124133
chr2L	+	21124373	21124438
chr2L	+	21124373	21124441
chr2L	+	21125439	21126157
chr2L	+	21125439	21127848
chr2L	+	21126374	21127848
chr2L	+	21128062	21128738
chr2L	+	21128062	21128777
chr2L	+	21128062	21132032
chr2L	+	21129082	21130003
chr2L	+	21129082	21132032
chr2L	+	21263123	21263646
chr2L	+	21263179	21263646
chr2L	+	21275806	21279882
chr2L	+	21275806	21281130
chr2L	+	21278429	21281130
chr2L	+	21280447	21281130
chr2L	+	21311017	21311191
chr2L	+	21311032	21311191
chr2L	+	21311032	21311751
chr2L	+	21311306	21311751
chr2L	+	21312043	21312096
chr2L	+	21312043	21312123
chr2L	+	21312208	21312282
chr2L	+	21312208	21318125
chr2L	+	21315538	21318125
chr2L	+	21318416	21318483
chr2L	+	21318419	21318483
chr2L	+	21380361	21382017
chr2L	+	21380361	21382040
chr2L	+	21380361	21382063
chr2L	+	21380365	21382017
chr2L	+	21380478	21382017
chr2L	+	21380478	21382098
chr2L	+	21380728	21382017
chr2L	-	2138158	2138344
chr2L	-	2138158	2139628
chr2L	+	21381668	21381738
chr2L	+	21381668	21382017
chr2L	+	21381788	21382017
chr2L	+	21381832	21381897
chr2L	+	21381832	21382017
chr2L	+	21381832	21384551
chr2L	+	21382330	21384453
chr2L	+	21382330	21384551
chr2L	+	21382330	21388501
chr2L	+	21384595	21385276
chr2L	+	21384595	21385282
chr2L	+	21385397	21385447
chr2L	+	21385397	21388501
chr2L	+	21385397	21388510
chr2L	+	21388669	21388730
chr2L	+	21388669	21390155
chr2L	-	2139673	2139726
chr2L	-	2139676	2139726
chr2L	+	21573561	21574785
chr2L	+	21573958	21574785
chr2L	-	21615676	21616180
chr2L	-	21615676	21617278
chr2L	-	21616573	21617278
chr2L	-	21617821	21617879
chr2L	-	21617821	21618002
chr2L	-	21617893	21618002
chr2L	-	21618110	21618494
chr2L	-	21618110	21623364
chr2L	+	21658854	21659093
chr2L	+	21658961	21659093
chr2L	-	21669913	21670447
chr2L	-	21669913	21670533
chr2L	-	21670481	21670533
chr2L	+	21719643	21720121
chr2L	+	21719643	21720357
chr2L	+	21719643	21725066
chr2L	+	21720481	21725066
chr2L	+	21725445	21727004
chr2L	+	21725445	21728026
chr2L	+	21727573	21728026
chr2L	-	21743971	21756552
chr2L	-	21753814	21756552
chr2L	-	2190643	2190705
chr2L	-	2190646	2190705
chr2L	-	2190784	2191848
chr2L	-	2191078	2191848
chr2L	+	22124216	22124660
chr2L	+	22124216	22124780
chr2L	+	22124697	22124780
chr2L	+	22146996	22154796
chr2L	+	22153706	22154796
chr2L	+	22158721	22160206
chr2L	+	22158721	22161676
chr2L	+	22160339	22161676
chr2L	+	22160349	22161676
chr2L	-	22167238	22167301
chr2L	-	22167253	22167301
chr2L	+	22240103	22240152
chr2L	+	22240103	22240168
chr2L	+	22253921	22257651
chr2L	+	22257252	22257651
chr2L	+	22257899	22257958
chr2L	+	22257902	22257958
chr2L	-	22427789	22428347
chr2L	-	22427795	22428347
chr2L	-	22429110	22429267
chr2L	-	22429110	22429351
chr2L	-	22429297	22429351
chr2L	+	22431300	22431357
chr2L	+	22431300	22432683
chr2L	+	22737579	22741700
chr2L	+	22737579	22741944
chr2L	+	22741531	22741700
chr2L	+	22741824	22741944
chr2L	-	228281	229171
chr2L	-	228281	230536
chr2L	+	22832037	22832084
chr2L	+	22832037	22832091
chr2L	+	22832566	22832617
chr2L	+	22832566	22832622
chr2L	+	22832741	22832803
chr2L	+	22832745	22832803
chr2L	-	229382	229928
chr2L	-	229382	230536
chr2L	-	22960833	22960930
chr2L	-	22960876	22960930
chr2L	-	229977	230536
chr2L	-	231034	231946
chr2L	-	231034	231961
chr2L	-	2361585	2364593
chr2L	-	2361585	2364639
chr2L	-	2361585	2364888
chr2L	-	2370520	2370610
chr2L	-	2370542	2370610
chr2L	+	2400350	2401105
chr2L	+	2400965	2401105
chr2L	+	2753660	2756006
chr2L	+	2755937	2756006
chr2L	+	2755945	2756006
chr2L	+	2756143	2756243
chr2L	+	2756170	2756243
chr2L	-	2782839	2783039
chr2L	-	2782940	2783039
chr2L	-	2787162	2792193
chr2L	-	2787168	2789345
chr2L	-	2787168	2792193
chr2L	-	2791304	2792193
chr2L	-	2793264	2793326
chr2L	-	2793270	2793326
chr2L	-	2793908	2798484
chr2L	-	2793908	2799907
chr2L	-	2798836	2799907
chr2L	+	2805601	2808978
chr2L	+	2808536	2808978
chr2L	-	284968	285431
chr2L	-	284968	286305
chr2L	-	284968	290811
chr2L	+	2856672	2856767
chr2L	+	2856672	2856771
chr2L	+	2859714	2864967
chr2L	+	2862840	2864967
chr2L	-	2882833	2882918
chr2L	-	2882833	2884991
chr2L	-	291031	291605
chr2L	-	291031	291659
chr2L	+	2957051	2960688
chr2L	+	2957264	2960688
chr2L	+	2959520	2960688
chr2L	+	2961996	2962270
chr2L	+	2961996	2962584
chr2L	+	2962286	2962584
chr2L	+	2997059	2997490
chr2L	+	2997059	2997789
chr2L	+	2997530	2997789
chr2L	+	3056924	3059603
chr2L	+	3057110	3059603
chr2L	+	306389	317741
chr2L	-	3081268	3089833
chr2L	-	3081268	3094215
chr2L	+	310605	317741
chr2L	+	343729	344022
chr2L	+	343729	344040
chr2L	+	344489	344553
chr2L	+	344489	344574
chr2L	-	3502123	3502414
chr2L	-	3502126	3502414
chr2L	+	3723764	3724882
chr2L	+	3723764	3725654
chr2L	+	3725196	3725654
chr2L	+	3725196	3726677
chr2L	+	3725901	3726677
chr2L	+	3759154	3759667
chr2L	+	3759154	3760066
chr2L	+	3759806	3760066
chr2L	+	3803730	3806967
chr2L	+	3806821	3806967
chr2L	-	3887556	3889429
chr2L	-	3887556	3893260
chr2L	-	3889784	3893260
chr2L	-	3911336	3914726
chr2L	-	3911336	3916779
chr2L	-	3915096	3916779
chr2L	-	3915099	3916779
chr2L	-	3989800	3990888
chr2L	-	3989800	3991538
chr2L	-	3989800	3991546
chr2L	-	3989800	3991632
chr2L	-	4190824	4192631
chr2L	-	4190824	4193308
chr2L	-	4192968	4193308
chr2L	-	4196779	4197871
chr2L	-	4196779	4197950
chr2L	+	4299177	4303334
chr2L	+	4299189	4303334
chr2L	+	4304841	4306533
chr2L	+	4304841	4307189
chr2L	+	4305423	4307189
chr2L	-	4455738	4455855
chr2L	-	4455738	4456112
chr2L	-	4456075	4456384
chr2L	-	4456332	4456384
chr2L	-	4456520	4456718
chr2L	-	4456520	4456722
chr2L	-	4457289	4457373
chr2L	-	4457318	4457373
chr2L	-	4458057	4458161
chr2L	-	4458057	4458287
chr2L	-	4475242	4476840
chr2L	-	4475318	4476840
chr2L	-	4475318	4476850
chr2L	-	4475336	4476840
chr2L	+	457562	457613
chr2L	+	457562	457626
chr2L	+	4853016	4854396
chr2L	+	4853016	4854433
chr2L	+	4872693	4873816
chr2L	+	4872693	4873870
chr2L	+	4874169	4874540
chr2L	+	4874169	4874885
chr2L	+	4874562	4874885
chr2L	-	4882492	4882863
chr2L	-	4882492	4882887
chr2L	-	4911641	4911721
chr2L	-	4911671	4911721
chr2L	-	4912778	4915045
chr2L	-	4912778	4925827
chr2L	+	492041	533886
chr2L	+	492041	533892
chr2L	-	4948559	4948896
chr2L	-	4948771	4948896
chr2L	+	4975100	4975151
chr2L	+	4975100	4975172
chr2L	+	4988848	4989388
chr2L	+	4988848	4990306
chr2L	+	4989410	4990306
chr2L	-	4994994	4999223
chr2L	-	4994994	5004170
chr2L	-	4994994	5004612
chr2L	-	4994994	5008179
chr2L	-	5004207	5004612
chr2L	-	5004207	5008179
chr2L	-	5004774	5006382
chr2L	-	5004774	5006443
chr2L	-	5042884	5042959
chr2L	-	5042887	5042959
chr2L	-	5042890	5042959
chr2L	-	5042890	5042982
chr2L	-	5042890	5043076
chr2L	+	5043383	5044305
chr2L	+	5043383	5044321
chr2L	+	5043383	5044581
chr2L	+	5043383	5045820
chr2L	+	5044689	5045820
chr2L	+	5045483	5045820
chr2L	+	5063210	5066868
chr2L	+	5064581	5066868
chr2L	+	5068394	5069125
chr2L	+	5068394	5070095
chr2L	+	5069219	5070095
chr2L	-	5074529	5075647
chr2L	-	5074529	5077075
chr2L	-	5075829	5077533
chr2L	-	5077257	5077533
chr2L	-	5079574	5092873
chr2L	-	5079574	5093240
chr2L	-	5079574	5093443
chr2L	-	5092898	5093443
chr2L	-	5092901	5093443
chr2L	+	5144785	5146991
chr2L	+	5146703	5146991
chr2L	+	5155849	5157872
chr2L	+	5155849	5158453
chr2L	+	5203742	5204449
chr2L	+	5203742	5204461
chr2L	+	5204592	5204834
chr2L	+	5204592	5204873
chr2L	+	5204592	5205102
chr2L	+	5204903	5205102
chr2L	-	5219107	5228765
chr2L	-	5221650	5236334
chr2L	-	5221650	5241367
chr2L	+	5327286	5327501
chr2L	+	5327350	5327501
chr2L	-	5332850	5335457
chr2L	-	5332850	5335662
chr2L	-	5332850	5335715
chr2L	-	5540300	5540423
chr2L	-	5540300	5540970
chr2L	+	5825249	5845303
chr2L	+	5825249	5848340
chr2L	+	5845952	5848340
chr2L	+	5851826	5852882
chr2L	+	5851826	5852991
chr2L	+	5852898	5852991
chr2L	+	5856318	5856381
chr2L	+	5856318	5856402
chr2L	-	5923479	5923530
chr2L	-	5923479	5923532
chr2L	+	5944445	5946042
chr2L	+	5944862	5946042
chr2L	+	5947332	5947855
chr2L	+	5947332	5948405
chr2L	-	5976782	5979410
chr2L	-	5976782	5980949
chr2L	-	5979704	5979817
chr2L	-	5979704	5979938
chr2L	-	5979704	5979950
chr2L	-	5979704	5980949
chr2L	-	5979704	5980951
chr2L	+	5981835	5983008
chr2L	+	5982821	5983008
chr2L	+	5985220	5985337
chr2L	+	5985220	5985341
chr2L	+	6001083	6001157
chr2L	+	6001083	6001475
chr2L	+	6001269	6001667
chr2L	+	6001593	6001667
chr2L	+	6083740	6092060
chr2L	+	6083740	6092993
chr2L	+	6092244	6092993
chr2L	+	6101798	6121772
chr2L	+	6113113	6121772
chr2L	+	6122410	6122696
chr2L	+	6122410	6122976
chr2L	+	6122853	6122976
chr2L	+	6329697	6330121
chr2L	+	6329697	6330769
chr2L	+	6457916	6458085
chr2L	+	6457916	6458169
chr2L	+	6458095	6458151
chr2L	+	6458095	6458169
chr2L	-	6471714	6473629
chr2L	-	6471714	6473648
chr2L	-	6572542	6573697
chr2L	-	6572542	6574014
chr2L	-	6573805	6574014
chr2L	-	6640203	6640355
chr2L	-	6640215	6640355
chr2L	-	6646947	6647919
chr2L	-	6646947	6647979
chr2L	-	6646947	6647996
chr2L	-	6646947	6649028
chr2L	-	6678224	6678910
chr2L	-	6678224	6679984
chr2L	-	6678756	6678910
chr2L	-	6678756	6679984
chr2L	-	6678933	6679984
chr2L	-	6679082	6679984
chr2L	-	6679262	6679984
chr2L	-	6680524	6680669
chr2L	-	6680524	6680945
chr2L	-	6680542	6680669
chr2L	-	6680542	6680945
chr2L	-	6680706	6680945
chr2L	-	6722430	6722795
chr2L	-	6722430	6723191
chr2L	-	6791841	6793226
chr2L	-	6791841	6794491
chr2L	-	6791841	6796335
chr2L	-	6793404	6794491
chr2L	+	6920861	6922636
chr2L	+	6920861	6922729
chr2L	-	7032177	7032309
chr2L	-	7032177	7032320
chr2L	+	7033018	7034179
chr2L	+	7033018	7034197
chr2L	+	7033018	7034482
chr2L	+	7033018	7035073
chr2L	+	7033018	7035405
chr2L	+	7033217	7034197
chr2L	+	7033217	7035073
chr2L	+	7034273	7034482
chr2L	+	7034273	7035073
chr2L	+	7034910	7035073
chr2L	+	7034912	7035405
chr2L	+	7041159	7051365
chr2L	+	7049725	7051365
chr2L	+	7182899	7183161
chr2L	+	7182899	7183501
chr2L	+	7184203	7184384
chr2L	+	7184203	7184613
chr2L	+	7184394	7184613
chr2L	-	7196857	7203933
chr2L	-	7196857	7203937
chr2L	+	72081	74901
chr2L	-	7223697	7225604
chr2L	-	7223697	7227102
chr2L	-	7225061	7225604
chr2L	-	7225856	7227102
chr2L	+	72977	74901
chr2L	+	73692	73818
chr2L	+	73692	74901
chr2L	+	73692	75076
chr2L	+	73897	74901
chr2L	+	74572	74901
chr2L	+	74572	75076
chr2L	-	7474505	7476977
chr2L	-	7476905	7476977
chr2L	+	75018	75076
chr2L	-	7644774	7644922
chr2L	-	7644786	7644922
chr2L	-	7646010	7648745
chr2L	-	7647266	7648745
chr2L	-	7647509	7648745
chr2L	-	7651743	7655052
chr2L	-	7651743	7655543
chr2L	-	7655221	7655543
chr2L	-	7656463	7657183
chr2L	-	7656463	7661696
chr2L	-	7697581	7698723
chr2L	-	7698130	7698723
chr2L	-	7786424	7786699
chr2L	-	7786424	7786988
chr2L	-	7826336	7826532
chr2L	-	7826336	7826768
chr2L	+	8036298	8036356
chr2L	+	8036298	8036380
chr2L	+	8036576	8036835
chr2L	+	8036576	8037088
chr2L	+	8036893	8037088
chr2L	-	8042613	8042690
chr2L	-	8042613	8042821
chr2L	+	8083521	8089183
chr2L	+	8083587	8089183
chr2L	+	8083636	8089183
chr2L	+	8083636	8089392
chr2L	+	8083943	8089183
chr2L	+	8088453	8089183
chr2L	+	8088453	8089392
chr2L	+	8088802	8089183
chr2L	+	8089736	8102298
chr2L	+	8089736	8105690
chr2L	+	8103503	8105690
chr2L	+	8107880	8109814
chr2L	+	8107880	8110479
chr2L	+	8110216	8110479
chr2L	-	8140778	8156519
chr2L	-	8140778	8159217
chr2L	+	8163518	8168439
chr2L	+	8163518	8173014
chr2L	+	8182450	8182625
chr2L	+	8182450	8183187
chr2L	-	8193229	8194043
chr2L	-	8193229	8194500
chr2L	-	8194059	8195019
chr2L	-	8194528	8195019
chr2L	+	824137	824189
chr2L	+	824137	824217
chr2L	+	826507	826647
chr2L	+	826507	829455
chr2L	+	8304577	8304660
chr2L	+	8304577	8304842
chr2L	+	8304772	8304842
chr2L	+	8369030	8369714
chr2L	+	8369030	8369797
chr2L	+	8377623	8377845
chr2L	+	8377793	8377845
chr2L	+	8384895	8384995
chr2L	+	8384895	8386215
chr2L	+	8385097	8386215
chr2L	+	8386385	8386473
chr2L	+	8386385	8386482
chr2L	+	8386385	8386485
chr2L	+	8428067	8428318
chr2L	+	8428067	8430279
chr2L	+	8429462	8430279
chr2L	-	8493092	8493742
chr2L	-	8493092	8493745
chr2L	+	8543512	8544542
chr2L	+	8543674	8544542
chr2L	+	8543715	8544542
chr2L	+	8564296	8610229
chr2L	+	8564296	8631025
chr2L	+	8663251	8664156
chr2L	+	8663251	8665444
chr2L	+	8663251	8666034
chr2L	+	8664220	8664373
chr2L	+	8664220	8665444
chr2L	+	8665518	8666034
chr2L	+	870552	871339
chr2L	+	871274	871339
chr2L	-	8945534	8950768
chr2L	-	8945534	8950976
chr2L	+	9162708	9163139
chr2L	+	9162708	9163293
chr2L	+	9167438	9191613
chr2L	+	9176467	9177120
chr2L	+	9176657	9177120
chr2L	+	9176661	9177120
chr2L	+	9177630	9191613
chr2L	+	9191813	9214462
chr2L	+	9191813	9233986
chr2L	+	9256651	9272464
chr2L	+	9256696	9256891
chr2L	+	9256696	9272464
chr2L	+	9257206	9272464
chr2L	+	9259421	9272464
chr2L	+	9259585	9272464
chr2L	+	9272607	9284258
chr2L	+	9272607	9291054
chr2L	+	9519479	9519718
chr2L	+	9519534	9519718
chr2L	-	9556398	9560086
chr2L	-	9556398	9565002
chr2L	-	9556398	9566431
chr2L	-	9556398	9566539
chr2L	-	9703605	9704064
chr2L	-	9703605	9705778
chr2L	-	9714153	9724075
chr2L	-	9714153	9743476
chr2L	-	9718520	9720089
chr2L	-	9718520	9722759
chr2L	-	9718520	9727026
chr2L	-	9720165	9722759
chr2L	-	9722942	9727026
chr2L	-	9722954	9727026
chr2L	-	9722954	9727134
chr2L	-	9727256	9732914
chr2L	-	9727256	9732953
chr2L	-	9792820	9792879
chr2L	-	9792827	9792879
chr2L	-	9798305	9802349
chr2L	-	9798305	9805824
chr2L	-	9798305	9806442
chr2L	-	9798305	9807308
chr2L	-	9802437	9807308
chr2L	-	9806530	9807308
chr2L	-	9815101	9875788
chr2L	-	9815912	9819285
chr2L	-	9815912	9825295
chr2L	-	9815912	9825611
chr2L	-	9819331	9825611
chr2L	-	9825341	9825611
chr2L	-	9825752	9869530
chr2L	-	9854878	9869530
chr2L	-	9870520	9877100
chr2L	-	9870520	9885930
chr2L	-	9877260	9885930
chr2L	-	9877285	9885930
chr2L	-	9877972	9885724
chr2L	-	9877972	9885930
chr2L	-	9878025	9885724
chr2L	-	9878025	9885930
chr2L	-	9905083	9905873
chr2L	-	9905291	9905873
chr2L	-	9907544	9907606
chr2L	-	9907547	9907606
chr2L	-	9907783	9908423
chr2L	-	9907847	9908423
chr2LHet	+	167315	167374
chr2LHet	+	167315	167382
chr2LHet	-	168745	168842
chr2LHet	-	168795	168842
chr2LHet	-	21373	21434
chr2LHet	-	21383	21434
chr2LHet	-	21569	32571
chr2LHet	-	25147	25334
chr2LHet	-	25147	32571
chr2LHet	-	25390	32571
chr2R	-	10051875	10051931
chr2R	-	10051875	10051990
chr2R	+	10058227	10059793
chr2R	+	10058956	10059793
chr2R	+	10059731	10059793
chr2R	+	10064196	10064678
chr2R	+	10064196	10065388
chr2R	+	10064982	10065388
chr2R	+	10065705	10065775
chr2R	+	10065708	10065775
chr2R	+	10066546	10066612
chr2R	+	10066546	10066615
chr2R	-	1009157	1009486
chr2R	-	1009157	1015729
chr2R	-	1009345	1009486
chr2R	-	1009345	1015729
chr2R	-	10103207	10103454
chr2R	-	10103207	10103456
chr2R	-	10103615	10103937
chr2R	-	10103615	10104033
chr2R	-	10119469	10120219
chr2R	-	10119469	10120228
chr2R	-	10121847	10121899
chr2R	-	10121847	10121946
chr2R	-	10121847	10122196
chr2R	-	10122064	10122196
chr2R	+	10163911	10164784
chr2R	+	10163933	10164784
chr2R	+	10163933	10166765
chr2R	+	10164031	10164784
chr2R	+	10164560	10164784
chr2R	+	10167147	10168898
chr2R	+	10167147	10173205
chr2R	+	10169061	10173205
chr2R	+	10179687	10179732
chr2R	+	10179687	10179747
chr2R	+	10179886	10181596
chr2R	+	10179886	10184204
chr2R	+	10181693	10184204
chr2R	+	1032363	1035704
chr2R	+	1032363	1040292
chr2R	+	1032541	1035704
chr2R	+	1036661	1040292
chr2R	+	10394854	10394919
chr2R	+	10394854	10395043
chr2R	+	10394986	10395043
chr2R	-	10491628	10491700
chr2R	-	10491633	10491700
chr2R	+	10509525	10509723
chr2R	+	10509525	10509743
chr2R	+	10509525	10510216
chr2R	+	10510036	10510216
chr2R	-	10641395	10641454
chr2R	-	10641395	10641490
chr2R	-	10650513	10651334
chr2R	-	10650579	10651334
chr2R	+	10658334	10659303
chr2R	+	10659147	10659303
chr2R	-	10662763	10662826
chr2R	-	10662766	10662826
chr2R	-	10834108	10834207
chr2R	-	10834108	10834682
chr2R	-	10834324	10835145
chr2R	-	10834805	10835145
chr2R	-	10840073	10840590
chr2R	-	10840094	10840590
chr2R	+	10851430	10859233
chr2R	+	10853504	10859233
chr2R	-	1091783	1099832
chr2R	+	10927555	10927620
chr2R	+	10927555	10927641
chr2R	-	1098379	1099832
chr2R	+	11027600	11027881
chr2R	+	11027600	11027974
chr2R	+	11027600	11028477
chr2R	+	11043720	11051389
chr2R	+	11043720	11068016
chr2R	+	11052605	11068016
chr2R	-	11155889	11157801
chr2R	-	11157262	11157801
chr2R	-	11159044	11160055
chr2R	-	11159661	11160055
chr2R	-	11160113	11161723
chr2R	-	11160113	11162042
chr2R	-	11160893	11162042
chr2R	+	11199472	11199536
chr2R	+	11199472	11199539
chr2R	+	11210217	11210627
chr2R	+	11210217	11210952
chr2R	+	11210246	11210627
chr2R	+	11210246	11210952
chr2R	+	11210646	11210952
chr2R	+	11311910	11340360
chr2R	+	11313171	11313532
chr2R	+	11313171	11313538
chr2R	+	11313171	11340360
chr2R	+	11314132	11340360
chr2R	+	11340513	11341244
chr2R	+	11340513	11343938
chr2R	+	11341302	11343938
chr2R	+	11344320	11345251
chr2R	+	11344320	11346402
chr2R	+	11345429	11346402
chr2R	+	11346772	11351974
chr2R	+	11346772	11352861
chr2R	+	11352191	11352861
chr2R	+	11352996	11353153
chr2R	+	11353011	11353153
chr2R	-	11407984	11408583
chr2R	-	11407984	11409345
chr2R	-	11408605	11409345
chr2R	-	11409445	11409505
chr2R	-	11409448	11409505
chr2R	-	11409609	11409939
chr2R	-	11409609	11410377
chr2R	-	11409970	11410377
chr2R	-	11455218	11455332
chr2R	-	11455218	11455655
chr2R	-	11455345	11455655
chr2R	-	11824085	11824524
chr2R	-	11824085	11825618
chr2R	-	11824085	11825950
chr2R	-	11824088	11824524
chr2R	-	11824088	11825618
chr2R	-	11824088	11825950
chr2R	-	11825384	11825950
chr2R	+	1182562	1182619
chr2R	+	1182568	1182619
chr2R	-	11825772	11825950
chr2R	-	11883819	11884398
chr2R	-	11883870	11884398
chr2R	-	11914763	11914840
chr2R	-	11914783	11914840
chr2R	+	11916930	11916977
chr2R	+	11916930	11916994
chr2R	+	11917165	11917225
chr2R	+	11917165	11917306
chr2R	+	11917165	11917373
chr2R	+	11919681	11925555
chr2R	+	11919939	11925555
chr2R	+	11936910	11936990
chr2R	+	11936914	11936990
chr2R	-	11973125	11973548
chr2R	-	11973125	11974434
chr2R	+	11990397	11991114
chr2R	+	11990454	11991114
chr2R	+	12020595	12023530
chr2R	+	12021188	12023530
chr2R	+	12066457	12069484
chr2R	+	12069170	12069484
chr2R	+	12084077	12084195
chr2R	+	12084107	12084195
chr2R	-	12093584	12097693
chr2R	-	12093584	12108626
chr2R	-	12093584	12109173
chr2R	-	12108654	12109173
chr2R	-	12213569	12213638
chr2R	-	12213569	12213836
chr2R	-	12213778	12213836
chr2R	-	12214665	12216056
chr2R	-	12214665	12220537
chr2R	-	12217903	12220537
chr2R	-	12220925	12221283
chr2R	-	12220925	12223993
chr2R	+	12224368	12226950
chr2R	+	12225941	12226950
chr2R	-	123841	123916
chr2R	-	123867	123916
chr2R	+	12439930	12442131
chr2R	+	12440126	12442131
chr2R	-	124591	125522
chr2R	+	12495839	12499837
chr2R	+	12495839	12506307
chr2R	+	12496830	12506307
chr2R	+	12500078	12506307
chr2R	+	12502988	12506307
chr2R	+	12505648	12506307
chr2R	-	125228	125522
chr2R	+	12529197	12529555
chr2R	+	12529197	12530446
chr2R	+	12529701	12530446
chr2R	+	12530627	12530683
chr2R	+	12530627	12531001
chr2R	+	12531161	12531559
chr2R	+	12531161	12532249
chr2R	+	12531599	12532249
chr2R	+	12532962	12533160
chr2R	+	12532962	12533164
chr2R	-	12544944	12546250
chr2R	-	12544944	12551018
chr2R	-	12641657	12641746
chr2R	-	12641657	12643390
chr2R	-	12641774	12643390
chr2R	-	12643955	12644059
chr2R	-	12643955	12644068
chr2R	-	12645907	12646755
chr2R	-	12646334	12646755
chr2R	-	12648219	12648909
chr2R	-	12648219	12649171
chr2R	-	12648952	12649171
chr2R	-	12650845	12651641
chr2R	-	12650845	12659757
chr2R	-	12650845	12659761
chr2R	-	12651879	12652831
chr2R	-	12651879	12653336
chr2R	+	12666039	12666093
chr2R	+	12666043	12666093
chr2R	+	12677420	12677659
chr2R	+	12677420	12678242
chr2R	+	12677771	12678242
chr2R	+	12743808	12744309
chr2R	+	12743820	12744309
chr2R	-	12752538	12752595
chr2R	-	12752541	12752595
chr2R	+	12812291	12813849
chr2R	+	12812295	12813849
chr2R	+	12812482	12813849
chr2R	+	12812542	12813849
chr2R	+	12813250	12813849
chr2R	+	12818783	12819967
chr2R	+	12818783	12827596
chr2R	+	12820083	12827596
chr2R	+	12861629	12867350
chr2R	+	12861629	12871769
chr2R	+	12867400	12871769
chr2R	+	12874255	12879154
chr2R	+	12874255	12881663
chr2R	+	12879167	12881663
chr2R	-	12898040	12898390
chr2R	-	12898040	12898657
chr2R	-	12898481	12898657
chr2R	-	12898561	12898657
chr2R	-	12900213	12900788
chr2R	-	12900279	12900788
chr2R	-	12902707	12903162
chr2R	-	12902707	12903166
chr2R	-	12906826	12906936
chr2R	-	12906854	12906936
chr2R	+	12938669	12939325
chr2R	+	12938669	12940772
chr2R	+	12940649	12940772
chr2R	-	12977880	12978862
chr2R	-	12977880	12979313
chr2R	-	12979028	12979313
chr2R	+	13104580	13107558
chr2R	+	13104580	13162913
chr2R	+	13107608	13143440
chr2R	+	13107608	13162913
chr2R	+	13153558	13162913
chr2R	+	13153716	13162913
chr2R	+	13161979	13162913
chr2R	+	13239810	13248616
chr2R	+	13239810	13249483
chr2R	+	13249602	13259228
chr2R	+	13249602	13260580
chr2R	+	13345377	13349497
chr2R	+	13346134	13349497
chr2R	-	13408433	13409209
chr2R	-	13408433	13410356
chr2R	-	13409405	13410356
chr2R	-	13409405	13411003
chr2R	-	13410465	13411003
chr2R	-	13411076	13411327
chr2R	-	13411076	13411587
chr2R	-	13411403	13411587
chr2R	-	13413918	13414337
chr2R	-	13413921	13414337
chr2R	-	13415610	13417485
chr2R	-	13415610	13418550
chr2R	-	13417639	13418550
chr2R	+	13448459	13448522
chr2R	+	13448469	13448522
chr2R	+	13450043	13450163
chr2R	+	13450043	13450461
chr2R	+	13460538	13460599
chr2R	+	13460538	13460606
chr2R	+	13557137	13557190
chr2R	+	13557137	13557646
chr2R	-	13566287	13566563
chr2R	-	13566287	13570896
chr2R	-	13585638	13585707
chr2R	-	13585660	13585707
chr2R	+	13586949	13587361
chr2R	+	13586954	13587361
chr2R	+	13587402	13587584
chr2R	+	13587402	13587588
chr2R	-	13605254	13606677
chr2R	-	13606370	13606677
chr2R	+	13681918	13682622
chr2R	+	13682055	13682622
chr2R	+	13683109	13684557
chr2R	+	13684069	13684557
chr2R	+	13685366	13685428
chr2R	+	13685366	13685431
chr2R	+	13738965	13742643
chr2R	+	13738965	13745145
chr2R	-	13755064	13755286
chr2R	-	13755064	13755790
chr2R	-	13755593	13755790
chr2R	-	13756313	13756570
chr2R	-	13756313	13758832
chr2R	+	13800384	13801592
chr2R	+	13800384	13801604
chr2R	-	14007905	14007970
chr2R	-	14007908	14007970
chr2R	-	14018550	14018639
chr2R	-	14018550	14018785
chr2R	-	14018694	14018785
chr2R	+	14028459	14028991
chr2R	+	14028921	14028991
chr2R	+	14032779	14032845
chr2R	+	14032783	14032845
chr2R	-	14043670	14045188
chr2R	-	14043670	14045349
chr2R	-	14043670	14045445
chr2R	-	14043670	14045476
chr2R	-	14177355	14243003
chr2R	-	14193640	14243003
chr2R	-	14243560	14244595
chr2R	-	14243560	14244641
chr2R	+	14271585	14271653
chr2R	+	14272199	14272262
chr2R	+	14274214	14274296
chr2R	+	14274235	14274296
chr2R	+	14309058	14311372
chr2R	+	14309058	14311630
chr2R	+	14311376	14311472
chr2R	+	14311376	14311630
chr2R	+	14311512	14311630
chr2R	+	14311991	14312110
chr2R	+	14311991	14312375
chr2R	+	14312171	14312375
chr2R	+	14312539	14312843
chr2R	+	14312539	14313467
chr2R	+	14312581	14312843
chr2R	+	14312581	14313467
chr2R	-	14325117	14325443
chr2R	-	14325117	14325711
chr2R	-	14325482	14325711
chr2R	-	14345103	14345398
chr2R	-	14345103	14348069
chr2R	-	14345659	14348069
chr2R	-	14345975	14348069
chr2R	-	14384373	14385345
chr2R	-	14384373	14385352
chr2R	-	14384410	14385277
chr2R	-	14384410	14385345
chr2R	+	14410225	14410476
chr2R	+	14410225	14411736
chr2R	+	14411212	14411736
chr2R	+	14427798	14431414
chr2R	+	14427798	14431417
chr2R	-	14520629	14520695
chr2R	-	14520632	14520695
chr2R	-	14530267	14540027
chr2R	-	14530267	14545583
chr2R	+	14575873	14579544
chr2R	+	14576055	14579544
chr2R	+	14576127	14579544
chr2R	+	14576246	14579544
chr2R	+	14576754	14579544
chr2R	+	14578521	14579544
chr2R	-	14616251	14616346
chr2R	-	14616291	14616346
chr2R	-	14644893	14644947
chr2R	-	14644893	14644951
chr2R	-	14646079	14646144
chr2R	-	14646088	14646144
chr2R	-	14664331	14664397
chr2R	-	14664343	14664397
chr2R	+	14708788	14708993
chr2R	+	14708788	14708996
chr2R	+	14708788	14709479
chr2R	+	14720186	14720293
chr2R	+	14720186	14720296
chr2R	-	14721289	14721354
chr2R	-	14721289	14721468
chr2R	-	14859268	14859332
chr2R	-	14859280	14859332
chr2R	-	1491916	1491971
chr2R	-	1491916	1491980
chr2R	-	1492021	1492086
chr2R	-	1492021	1492213
chr2R	-	1492155	1492213
chr2R	+	1496302	1496516
chr2R	+	1496340	1496516
chr2R	+	1496994	1497567
chr2R	+	1496994	1498695
chr2R	+	1497761	1498695
chr2R	+	15025408	15025731
chr2R	+	15025649	15025731
chr2R	+	15025766	15026644
chr2R	+	15025766	15027197
chr2R	+	15026854	15027197
chr2R	+	15048920	15048976
chr2R	+	15048920	15048979
chr2R	+	15062591	15063691
chr2R	+	15062753	15063691
chr2R	+	15062813	15063691
chr2R	+	15062813	15063751
chr2R	+	15062813	15063769
chr2R	+	15064248	15064444
chr2R	+	15064248	15065322
chr2R	+	15065078	15065322
chr2R	+	15105699	15108247
chr2R	+	15105699	15110743
chr2R	+	15108287	15110743
chr2R	+	15124568	15124831
chr2R	+	15124568	15125655
chr2R	+	15124946	15125655
chr2R	+	15125939	15128719
chr2R	+	15125939	15129677
chr2R	+	15125939	15130207
chr2R	+	15129290	15129677
chr2R	+	15129290	15130207
chr2R	+	15129900	15129987
chr2R	+	15129900	15130207
chr2R	+	15130090	15130207
chr2R	-	15286598	15293523
chr2R	-	15286598	15294118
chr2R	-	15286598	15295344
chr2R	-	15293593	15294118
chr2R	-	15293593	15295344
chr2R	-	15294149	15295344
chr2R	-	15294824	15295344
chr2R	-	15306110	15311097
chr2R	-	15306110	15312326
chr2R	-	15311302	15312326
chr2R	+	15316049	15316740
chr2R	+	15316138	15316740
chr2R	+	15329994	15330121
chr2R	+	15330061	15330121
chr2R	+	15330603	15330663
chr2R	+	15330603	15330816
chr2R	+	15330744	15330816
chr2R	+	15344480	15347298
chr2R	+	15344978	15347298
chr2R	+	15348121	15358100
chr2R	+	15353199	15358100
chr2R	+	15359241	15360322
chr2R	+	15359250	15360322
chr2R	+	15360669	15360943
chr2R	+	15360684	15360943
chr2R	+	15361472	15362031
chr2R	+	15361472	15365137
chr2R	+	15361472	15365164
chr2R	+	15361472	15366255
chr2R	+	15362146	15366255
chr2R	+	15366370	15368654
chr2R	+	15366370	15370455
chr2R	-	15418205	15419673
chr2R	-	15418205	15419679
chr2R	-	15425716	15433515
chr2R	-	15425716	15451944
chr2R	-	15425716	15451965
chr2R	-	15425716	15453652
chr2R	-	15425716	15461506
chr2R	-	15433564	15451944
chr2R	-	15433564	15451965
chr2R	-	1545080	1545146
chr2R	-	1545086	1545146
chr2R	-	15452017	15461491
chr2R	-	15452017	15461506
chr2R	-	15454665	15461506
chr2R	-	15461831	15488385
chr2R	-	15476248	15488385
chr2R	-	15516575	15517706
chr2R	-	15516575	15517987
chr2R	-	15516575	15518356
chr2R	-	15516575	15518540
chr2R	-	15551989	15552050
chr2R	-	15551989	15553028
chr2R	-	15552171	15553028
chr2R	+	15599955	15600013
chr2R	+	15599958	15600013
chr2R	-	16143076	16143131
chr2R	-	16143088	16143131
chr2R	-	16143314	16143389
chr2R	-	16143314	16143586
chr2R	-	16143540	16143939
chr2R	-	16143740	16143939
chr2R	+	16211916	16212001
chr2R	+	16211916	16212351
chr2R	+	16214898	16215370
chr2R	+	16214898	16215830
chr2R	+	16215639	16215830
chr2R	+	16317281	16319346
chr2R	+	16317281	16346991
chr2R	+	16319368	16346991
chr2R	+	16357625	16357917
chr2R	+	16357625	16359044
chr2R	+	16358083	16359044
chr2R	+	16359480	16359577
chr2R	+	16359489	16359577
chr2R	+	16475249	16477120
chr2R	+	16475249	16483060
chr2R	+	16477172	16483060
chr2R	+	16483319	16485051
chr2R	+	16483319	16485956
chr2R	+	16485096	16485956
chr2R	+	16486199	16492199
chr2R	+	16490653	16492199
chr2R	+	16493356	16493947
chr2R	+	16493381	16493947
chr2R	+	16528623	16528672
chr2R	+	16528623	16528684
chr2R	+	16599274	16631681
chr2R	+	16600914	16631681
chr2R	+	16621444	16631681
chr2R	+	16621444	16637187
chr2R	+	16766403	16766471
chr2R	+	16766403	16766474
chr2R	+	16907087	16907243
chr2R	+	16907087	16907590
chr2R	+	16907364	16907590
chr2R	+	16908822	16909004
chr2R	+	16908822	16909389
chr2R	+	16908822	16910568
chr2R	+	16908822	16910937
chr2R	+	16909026	16909389
chr2R	+	16909026	16910568
chr2R	+	16909638	16910568
chr2R	+	16909638	16910937
chr2R	+	16910670	16910937
chr2R	+	16911091	16911165
chr2R	+	16911091	16911479
chr2R	+	16911259	16911479
chr2R	+	1692959	1703960
chr2R	+	1692959	1719850
chr2R	+	16964644	16972701
chr2R	+	16972203	16972701
chr2R	+	16974442	16975284
chr2R	+	16974917	16975284
chr2R	-	17014638	17014905
chr2R	-	17014638	17015905
chr2R	-	17043236	17043292
chr2R	-	17043236	17043296
chr2R	-	17044802	17045718
chr2R	-	17044802	17047600
chr2R	-	17044802	17047932
chr2R	+	17093319	17095973
chr2R	+	17095017	17095973
chr2R	+	17166330	17166486
chr2R	+	17166330	17167302
chr2R	+	17166598	17167302
chr2R	+	17181294	17181353
chr2R	+	17181294	17181557
chr2R	+	17181379	17181557
chr2R	+	17195663	17195795
chr2R	+	17195663	17195955
chr2R	+	17195826	17195955
chr2R	-	17282550	17285568
chr2R	-	17282550	17286390
chr2R	-	17282550	17286678
chr2R	-	17286085	17286678
chr2R	-	17286088	17286678
chr2R	-	17299923	17304383
chr2R	-	17299923	17367594
chr2R	-	17338010	17367594
chr2R	-	17348864	17367594
chr2R	-	17367861	17368517
chr2R	-	17367861	17368583
chr2R	-	17382831	17384567
chr2R	-	17382831	17385284
chr2R	+	17389984	17391124
chr2R	+	17389984	17394798
chr2R	+	17389984	17397609
chr2R	+	17389984	17397621
chr2R	+	17389984	17398370
chr2R	+	17397706	17398370
chr2R	+	17399682	17401020
chr2R	+	17399682	17401712
chr2R	+	17399682	17401732
chr2R	+	17399682	17403391
chr2R	+	1741291	1743018
chr2R	+	1741297	1743018
chr2R	+	1741306	1743018
chr2R	-	17493698	17493971
chr2R	-	17493865	17493971
chr2R	+	17540068	17540416
chr2R	+	17540068	17540722
chr2R	+	17540068	17542278
chr2R	+	17541568	17542278
chr2R	+	17545614	17545849
chr2R	+	17545614	17545854
chr2R	+	17545685	17545849
chr2R	+	17545689	17545849
chr2R	+	17545766	17545849
chr2R	+	17545780	17545849
chr2R	+	17545780	17545854
chr2R	-	17586105	17590176
chr2R	-	17586105	17590180
chr2R	-	17586105	17591826
chr2R	+	17600892	17602909
chr2R	+	1796218	1797304
chr2R	-	17996285	17996354
chr2R	-	17996285	17997090
chr2R	-	17997865	17998049
chr2R	-	17997865	17998831
chr2R	-	18222469	18223184
chr2R	-	18222469	18226304
chr2R	-	18223297	18226304
chr2R	-	18225417	18226304
chr2R	-	18229100	18230024
chr2R	-	18229100	18232217
chr2R	-	18234214	18241891
chr2R	-	18234214	18247757
chr2R	+	18294830	18294958
chr2R	+	18294830	18295050
chr2R	-	18387241	18400314
chr2R	-	18387241	18422348
chr2R	+	18502226	18507308
chr2R	+	18502936	18507308
chr2R	-	18632223	18632548
chr2R	-	18632241	18632548
chr2R	+	18759915	18760789
chr2R	+	18760669	18760789
chr2R	+	18764370	18764423
chr2R	+	18764370	18764435
chr2R	+	18767565	18767654
chr2R	+	18767565	18767999
chr2R	+	18767741	18767999
chr2R	+	18774771	18774828
chr2R	+	18774771	18774831
chr2R	+	18815152	18816609
chr2R	+	18815152	18817320
chr2R	+	18817842	18819036
chr2R	+	18818803	18819036
chr2R	+	18955361	18955468
chr2R	+	18955364	18955468
chr2R	+	18955651	18958128
chr2R	+	18957185	18958128
chr2R	+	1897006	1897301
chr2R	+	1897006	1897882
chr2R	+	1897329	1897882
chr2R	+	1897357	1897882
chr2R	+	1898273	1898435
chr2R	+	1898273	1898444
chr2R	-	19079127	19091038
chr2R	-	19079127	19091088
chr2R	-	19270645	19270841
chr2R	-	19270645	19270886
chr2R	-	19277750	19277826
chr2R	-	19277771	19277826
chr2R	-	19281003	19282438
chr2R	-	19281003	19283950
chr2R	+	19545537	19552815
chr2R	+	19548056	19552815
chr2R	+	19563511	19564542
chr2R	+	19563511	19564569
chr2R	+	19571188	19571250
chr2R	+	19571188	19571769
chr2R	+	19571709	19571769
chr2R	-	19588113	19588322
chr2R	-	19588113	19589632
chr2R	-	19588392	19589632
chr2R	+	19595997	19596151
chr2R	+	19595997	19596156
chr2R	+	19596010	19596151
chr2R	+	19596010	19596156
chr2R	-	1968539	1969239
chr2R	-	1968920	1969239
chr2R	-	19699247	19699316
chr2R	-	19699260	19699316
chr2R	-	1971512	1971672
chr2R	-	1971512	1972011
chr2R	-	1971895	1972011
chr2R	-	1972524	1972589
chr2R	-	1972536	1972589
chr2R	-	19748980	19749782
chr2R	-	19748980	19750011
chr2R	-	19748983	19749782
chr2R	-	19748983	19750011
chr2R	+	19797332	19799198
chr2R	+	19797356	19799198
chr2R	+	19799074	19799198
chr2R	+	19810101	19810162
chr2R	+	19810552	19810861
chr2R	+	19810552	19811523
chr2R	+	19810552	19811937
chr2R	+	19810916	19811523
chr2R	+	19811617	19811937
chr2R	+	19830124	19831751
chr2R	+	19830337	19831751
chr2R	-	19835175	19835873
chr2R	-	19835718	19835873
chr2R	-	19854959	19855037
chr2R	-	19854985	19855037
chr2R	+	19861984	19862034
chr2R	+	19861984	19862039
chr2R	-	19907844	19907905
chr2R	-	19907865	19907905
chr2R	+	19911943	19912421
chr2R	+	19912128	19912421
chr2R	+	19921943	19922209
chr2R	+	19921955	19922209
chr2R	-	19932273	19932331
chr2R	-	19932273	19932335
chr2R	+	19945425	19946005
chr2R	+	19945429	19946005
chr2R	-	19953836	19954082
chr2R	-	19953836	19954684
chr2R	-	19954239	19954684
chr2R	+	19957765	19958289
chr2R	+	19957765	19959512
chr2R	+	19957765	19959516
chr2R	+	19958527	19960226
chr2R	+	19959747	19960226
chr2R	+	20007129	20007417
chr2R	+	20007129	20008233
chr2R	+	20007777	20008233
chr2R	-	20046608	20046666
chr2R	-	20046608	20046670
chr2R	-	20272571	20277115
chr2R	-	20272571	20277119
chr2R	-	20286706	20287367
chr2R	-	20286706	20287721
chr2R	-	20287414	20287721
chr2R	-	2040055	2043661
chr2R	-	2040055	2056259
chr2R	+	20419159	20419961
chr2R	+	20419257	20419961
chr2R	+	20419623	20419961
chr2R	+	20419901	20419961
chr2R	+	20428543	20442875
chr2R	+	20433213	20442875
chr2R	+	20443094	20443526
chr2R	+	20443094	20443805
chr2R	+	20443094	20445551
chr2R	+	20443570	20445551
chr2R	+	20445222	20445551
chr2R	+	20461193	20461273
chr2R	+	20461193	20461337
chr2R	+	20461280	20461337
chr2R	+	20462256	20462480
chr2R	+	20462423	20462480
chr2R	-	20498805	20502250
chr2R	-	20503722	20508223
chr2R	-	20580992	20581792
chr2R	-	20581179	20581792
chr2R	-	20655100	20655160
chr2R	-	20655100	20655619
chr2R	-	20673206	20673257
chr2R	-	20673206	20673263
chr2R	-	20674222	20674290
chr2R	-	20674227	20674290
chr2R	-	20763182	20763286
chr2R	+	20779215	20779923
chr2R	+	20779215	20781605
chr2R	+	20779243	20779805
chr2R	+	20779243	20779923
chr2R	+	20779243	20781605
chr2R	+	20779348	20779923
chr2R	+	20779360	20779805
chr2R	+	20779360	20779923
chr2R	+	20779401	20779805
chr2R	+	20779601	20779805
chr2R	+	20780071	20781605
chr2R	-	20791112	20791219
chr2R	+	20794796	20796000
chr2R	+	20795672	20796000
chr2R	+	20802985	20803252
chr2R	+	20802985	20804293
chr2R	+	20803354	20804841
chr2R	+	20804413	20804841
chr2R	+	20805052	20805169
chr2R	+	20805100	20805169
chr2R	+	20826365	20826477
chr2R	+	20826365	20826495
chr2R	+	20826740	20826792
chr2R	+	20826740	20826795
chr2R	+	20839033	20839102
chr2R	+	20839033	20839105
chr2R	-	20861330	20861386
chr2R	-	20861340	20861386
chr2R	-	20878795	20879086
chr2R	-	20878795	20879331
chr2R	-	20879221	20879331
chr2R	-	20898139	20898833
chr2R	-	20898139	20898897
chr2R	+	20925053	20925223
chr2R	+	20925053	20926572
chr2R	+	20925487	20926572
chr2R	+	20925493	20926572
chr2R	+	20925506	20926572
chr2R	-	20960726	20960799
chr2R	-	20960737	20960799
chr2R	-	20965529	20966236
chr2R	-	20965529	20971386
chr2R	-	2097979	2098050
chr2R	-	2097988	2098050
chr2R	-	2098330	2099099
chr2R	-	2098360	2099099
chr2R	-	2519645	2519809
chr2R	-	2519645	2519827
chr2R	-	2519645	2520498
chr2R	-	2521437	2521514
chr2R	-	2521453	2521514
chr2R	+	2556729	2556833
chr2R	+	2556737	2556812
chr2R	+	2556737	2556833
chr2R	+	2563417	2579201
chr2R	+	2568235	2579201
chr2R	+	2579139	2579201
chr2R	-	2583336	2583395
chr2R	-	2583348	2583395
chr2R	+	2584434	2584919
chr2R	+	2584507	2584919
chr2R	+	2631044	2631096
chr2R	+	2631049	2631096
chr2R	+	2640493	2640730
chr2R	+	2640493	2641683
chr2R	+	2641008	2642205
chr2R	+	2641008	2642208
chr2R	+	2641943	2642205
chr2R	+	2641943	2642208
chr2R	+	2642622	2642688
chr2R	+	2642631	2642688
chr2R	-	2661291	2675965
chr2R	-	2661291	2679819
chr2R	-	266660	295484
chr2R	+	2701258	2701540
chr2R	+	2701258	2702563
chr2R	+	2716172	2717005
chr2R	+	2716172	2717064
chr2R	-	2763623	2764724
chr2R	-	2764031	2764099
chr2R	-	2764031	2764724
chr2R	-	2764238	2764724
chr2R	-	2764627	2764724
chr2R	-	2765863	2765942
chr2R	-	2765863	2766348
chr2R	+	2797605	2798255
chr2R	+	2797982	2798255
chr2R	-	280188	295484
chr2R	-	280190	295484
chr2R	-	2814326	2814893
chr2R	-	2814326	2816012
chr2R	-	2816341	2816576
chr2R	-	2816341	2817326
chr2R	-	2816341	2817752
chr2R	-	2816778	2817326
chr2R	-	2817603	2817752
chr2R	-	2821685	2821852
chr2R	-	2821685	2822309
chr2R	-	2821868	2822309
chr2R	-	2822613	2822718
chr2R	-	2822613	2822926
chr2R	-	2822800	2822926
chr2R	-	2826848	2850383
chr2R	-	2832932	2850383
chr2R	-	2866102	2872915
chr2R	-	2870254	2872915
chr2R	+	2900621	2904516
chr2R	+	2904407	2904516
chr2R	+	2929211	2929288
chr2R	+	2929235	2929288
chr2R	-	295537	296966
chr2R	-	295537	315439
chr2R	-	3208269	3208870
chr2R	-	3208269	3209086
chr2R	-	3208883	3209086
chr2R	-	3209154	3209886
chr2R	-	3209154	3210063
chr2R	-	3209902	3210063
chr2R	-	3210837	3211322
chr2R	-	3210837	3212073
chr2R	-	3210837	3212085
chr2R	-	3211473	3212085
chr2R	-	3212242	3213655
chr2R	-	3212242	3214120
chr2R	-	3213869	3216792
chr2R	-	3214289	3216792
chr2R	-	3249372	3250527
chr2R	-	3249372	3251681
chr2R	-	3249372	3252815
chr2R	-	3249372	3253969
chr2R	-	3250995	3255891
chr2R	-	3251270	3255891
chr2R	-	3252987	3255891
chr2R	-	3254132	3255891
chr2R	+	3277015	3277472
chr2R	+	3277015	3277581
chr2R	-	3294565	3294633
chr2R	-	3294565	3294641
chr2R	-	3294565	3295243
chr2R	+	3330880	3330946
chr2R	+	3330887	3330946
chr2R	-	3331790	3331846
chr2R	-	3331790	3331852
chr2R	-	3354555	3354724
chr2R	-	3354555	3354986
chr2R	-	3354821	3354977
chr2R	-	3354821	3354986
chr2R	-	3355331	3355925
chr2R	-	3355331	3356863
chr2R	-	3356042	3356863
chr2R	-	3373672	3375959
chr2R	-	3373672	3376836
chr2R	-	3415481	3416531
chr2R	-	3415481	3420256
chr2R	-	3493749	3495925
chr2R	-	3493749	3501437
chr2R	-	3493749	3501964
chr2R	-	3493749	3507836
chr2R	-	3607501	3609537
chr2R	-	3607501	3613192
chr2R	-	3617213	3622657
chr2R	-	3617213	3622880
chr2R	-	3629425	3632383
chr2R	-	3629425	3645538
chr2R	-	3641073	3645538
chr2R	-	3692443	3692925
chr2R	-	3692443	3693729
chr2R	+	3694706	3694819
chr2R	+	3694706	3695072
chr2R	+	3694856	3695072
chr2R	+	3700196	3700784
chr2R	+	3700497	3700784
chr2R	-	3709990	3710052
chr2R	+	3713005	3713103
chr2R	+	3713050	3713103
chr2R	-	3732704	3733242
chr2R	-	3732864	3733242
chr2R	+	3808289	3808507
chr2R	+	3808449	3808507
chr2R	-	3859034	3859140
chr2R	-	3859069	3859140
chr2R	-	3898050	3898274
chr2R	-	3898050	3898417
chr2R	-	3954248	3954688
chr2R	-	3954263	3954629
chr2R	-	3954263	3954688
chr2R	+	3963607	3963796
chr2R	+	3963613	3963796
chr2R	+	3963953	3965234
chr2R	+	3964797	3965234
chr2R	-	4003220	4003635
chr2R	-	4003530	4003635
chr2R	+	4020580	4020641
chr2R	+	4020580	4020644
chr2R	-	4024598	4037598
chr2R	-	4024911	4037598
chr2R	-	4025187	4026441
chr2R	-	4026097	4026441
chr2R	-	4027654	4027746
chr2R	-	4027654	4028017
chr2R	-	4027876	4028017
chr2R	-	4028118	4028184
chr2R	-	4028121	4028184
chr2R	-	4028629	4037598
chr2R	-	4030579	4033258
chr2R	-	4030579	4043558
chr2R	-	4032693	4037598
chr2R	-	4033746	4037598
chr2R	-	4033781	4037598
chr2R	+	4281242	4282066
chr2R	+	4281242	4282069
chr2R	+	434559	447864
chr2R	+	434559	450348
chr2R	+	448294	448458
chr2R	+	448294	450348
chr2R	+	448294	451937
chr2R	+	449192	450348
chr2R	+	4502754	4502910
chr2R	+	4502768	4502910
chr2R	+	450586	451937
chr2R	+	4505966	4506022
chr2R	+	4505966	4506034
chr2R	+	4553816	4562150
chr2R	+	4554299	4562150
chr2R	-	4607289	4607346
chr2R	-	4607289	4607358
chr2R	-	4619316	4619425
chr2R	-	4619316	4619663
chr2R	-	4619468	4619663
chr2R	-	4786817	4786870
chr2R	-	4786820	4786870
chr2R	+	4789027	4789640
chr2R	+	4789027	4789831
chr2R	-	4806968	4807027
chr2R	-	4806971	4807027
chr2R	-	4836446	4837349
chr2R	-	4836446	4838209
chr2R	+	487592	494267
chr2R	+	487592	495862
chr2R	+	494825	495862
chr2R	+	4961955	4962343
chr2R	+	4961964	4962343
[truncated: 5,603 more rows]

## Sheet: LNv
Chromosome	Strand	Start coordinate	End coordinate
chr2L	+	10007178	10007250
chr2L	+	10007178	10007253
chr2L	+	10009536	10010735
chr2L	+	10010557	10010735
chr2L	-	10098010	10125999
chr2L	-	1012456	1013239
chr2L	-	1012463	1013239
chr2L	-	10125569	10125999
chr2L	-	10178085	10180105
chr2L	-	10178416	10180105
chr2L	-	10178477	10179435
chr2L	-	10178477	10179450
chr2L	-	10178477	10180105
chr2L	-	10178477	10180215
chr2L	-	10179519	10180105
chr2L	-	10179571	10180105
chr2L	-	1019321	1033685
chr2L	-	1020806	1033685
chr2L	+	10212402	10212450
chr2L	+	10212402	10212466
chr2L	-	10217180	10217339
chr2L	-	10217180	10217351
chr2L	-	10225811	10225872
chr2L	-	10225811	10226663
chr2L	-	10225965	10226663
chr2L	-	10229955	10231281
chr2L	-	10229955	10231537
chr2L	+	10232659	10233479
chr2L	+	10232659	10233755
chr2L	+	10233561	10233755
chr2L	-	10255270	10255719
chr2L	-	10256506	10256908
chr2L	-	10256506	10257393
chr2L	-	10256506	10257776
chr2L	-	10257122	10257393
chr2L	-	10257716	10257776
chr2L	-	10260584	10260728
chr2L	-	10260584	10260740
chr2L	+	10264264	10264547
chr2L	+	10264264	10264550
chr2L	+	10264885	10264945
chr2L	+	10264889	10264945
chr2L	-	10275384	10275447
chr2L	-	10275387	10275447
chr2L	-	10276567	10277393
chr2L	-	10276567	10277812
chr2L	-	10303598	10303653
chr2L	-	10303598	10303781
chr2L	-	1034190	1042962
chr2L	-	1034190	1046808
chr2L	+	10376553	10377246
chr2L	+	10376884	10377246
chr2L	+	10398740	10399315
chr2L	+	10398749	10399315
chr2L	+	10399676	10399766
chr2L	+	10399688	10399766
chr2L	+	10399712	10399766
chr2L	+	10408386	10408737
chr2L	+	10408386	10409709
chr2L	+	10408621	10408737
chr2L	+	10416636	10416689
chr2L	+	10416636	10416692
chr2L	+	10427003	10427074
chr2L	+	10427008	10427074
chr2L	-	1046731	1046808
chr2L	-	1047022	1047723
chr2L	-	1047022	1047944
chr2L	-	1047022	1047954
chr2L	+	10481570	10481620
chr2L	+	10481570	10481628
chr2L	+	10481570	10481645
chr2L	+	10482574	10482623
chr2L	+	10482574	10482635
chr2L	+	108101	108586
chr2L	+	1082052	1082118
chr2L	+	1082056	1082118
chr2L	+	108226	108586
chr2L	+	108346	108586
chr2L	-	10842273	10842379
chr2L	-	10842273	10842383
chr2L	-	10848863	10850215
chr2L	-	10848863	10850752
chr2L	-	1088106	1101919
chr2L	-	1088106	1102321
chr2L	-	10966409	10966500
chr2L	-	10966409	10968436
chr2L	-	10966621	10968103
chr2L	-	10966621	10968132
chr2L	+	10978706	10979631
chr2L	+	10978706	10980443
chr2L	+	10979713	10980443
chr2L	+	10989870	10990094
chr2L	+	10989874	10990094
chr2L	+	10994021	10994847
chr2L	+	10994021	10995842
chr2L	+	10994021	10997333
chr2L	-	1101968	1102321
chr2L	-	11076855	11076925
chr2L	-	11076861	11076925
chr2L	-	11076864	11076925
chr2L	-	11077233	11081152
chr2L	-	11077238	11081152
chr2L	-	11083924	11084018
chr2L	-	11083945	11084018
chr2L	+	11109507	11110103
chr2L	+	11109507	11110157
chr2L	-	11166143	11166688
chr2L	-	11166143	11175159
chr2L	+	1139763	1139827
chr2L	+	1139763	1139830
chr2L	-	11510850	11511054
chr2L	-	11510850	11511177
chr2L	-	1153731	1154280
chr2L	-	1153731	1154550
chr2L	-	1153731	1155744
chr2L	-	1153731	1157660
chr2L	-	1153731	1158077
chr2L	-	1154406	1154550
chr2L	-	1155053	1155744
chr2L	+	1170363	1170417
chr2L	+	1170363	1170428
chr2L	+	1174266	1174495
chr2L	+	1174266	1174908
chr2L	+	1174570	1174908
chr2L	+	1178467	1178822
chr2L	+	1178467	1178839
chr2L	+	1179196	1179450
chr2L	+	1179196	1179858
chr2L	+	1179525	1179858
chr2L	-	11797741	11797827
chr2L	-	11797741	11798663
chr2L	-	11798041	11798663
chr2L	-	11803898	11806046
chr2L	-	11803898	11808012
chr2L	-	11803898	11809124
chr2L	-	11806157	11806826
chr2L	-	11806157	11808012
chr2L	-	11806157	11809124
chr2L	-	12052684	12052762
chr2L	+	12103834	12104490
chr2L	+	12104056	12104490
chr2L	+	12104382	12104490
chr2L	+	12142833	12145068
chr2L	+	12142873	12145068
chr2L	+	12206130	12240866
chr2L	+	12222337	12240866
chr2L	+	12239408	12240866
chr2L	+	12350215	12351702
chr2L	+	12351601	12351702
chr2L	+	12358261	12359599
chr2L	+	12358261	12362599
chr2L	+	12359683	12362599
chr2L	-	12458223	12460587
chr2L	-	12458223	12477113
chr2L	-	12477166	12482559
chr2L	-	12477166	12498523
chr2L	-	12477166	12504077
chr2L	-	12477166	12536273
chr2L	-	12517185	12536273
chr2L	-	12540900	12545475
chr2L	-	12540900	12545641
chr2L	-	12540900	12546408
chr2L	-	126227	128798
chr2L	-	126227	130506
chr2L	+	12695162	12695303
chr2L	+	12695162	12696265
chr2L	+	12696136	12696265
chr2L	+	12727116	12728019
chr2L	+	12727116	12729929
chr2L	+	12727116	12736034
chr2L	+	12728241	12737957
chr2L	+	12730151	12737957
chr2L	+	12736256	12737957
chr2L	-	128942	130506
chr2L	-	12997923	12999008
chr2L	-	12997923	12999461
chr2L	-	12997923	12999725
chr2L	-	13018174	13018788
chr2L	-	13018177	13018788
chr2L	-	13164740	13164823
chr2L	-	13164762	13164823
chr2L	-	13170784	13171311
chr2L	-	13170784	13171380
chr2L	+	13208777	13209434
chr2L	+	13208777	13209470
chr2L	+	13208777	13209491
chr2L	+	13384022	13384655
chr2L	+	13384022	13384982
chr2L	+	13384022	13384985
chr2L	+	13384794	13384982
chr2L	+	13384794	13384985
chr2L	-	13386257	13386486
chr2L	-	13386257	13386528
chr2L	+	13415776	13420130
chr2L	+	13415776	13422990
chr2L	+	13420669	13422990
chr2L	+	13485249	13486916
chr2L	+	13485249	13489469
chr2L	+	13486977	13489469
chr2L	+	13550293	13551140
chr2L	+	13550420	13550983
chr2L	+	13550420	13551140
chr2L	+	13550420	13551262
chr2L	+	13599251	13605478
chr2L	+	13599251	13611343
chr2L	+	13599251	13613063
chr2L	+	13599251	13617593
chr2L	+	13599251	13623120
chr2L	+	13599251	13626016
chr2L	+	13599253	13599287
chr2L	+	13599253	13600396
chr2L	+	13599253	13611343
chr2L	+	13636213	13636382
chr2L	+	13636213	13637286
chr2L	+	13636761	13637286
chr2L	+	13636843	13637286
chr2L	+	13836432	13840900
chr2L	+	13836432	13891298
chr2L	+	13891532	13895027
chr2L	+	13894375	13895027
chr2L	+	14040221	14041319
chr2L	+	14040394	14041319
chr2L	+	14040465	14041319
chr2L	-	14197867	14198582
chr2L	-	14197867	14217025
chr2L	-	14197867	14222015
chr2L	-	14209117	14222015
chr2L	-	14217069	14222015
chr2L	-	14222081	14229457
chr2L	-	14222081	14233646
chr2L	-	14227107	14229457
chr2L	-	14229536	14233646
chr2L	-	15067689	15067914
chr2L	-	15067689	15067994
chr2L	+	15088430	15089043
chr2L	+	15088430	15090897
chr2L	+	15092641	15092897
chr2L	+	15092641	15093417
chr2L	+	15093036	15093417
chr2L	+	15093683	15094132
chr2L	+	15093683	15094677
chr2L	+	15094232	15094677
chr2L	-	15178321	15200072
chr2L	-	15190599	15200072
chr2L	+	155429	155544
chr2L	+	155429	155565
chr2L	+	155429	155636
chr2L	+	1555205	1556538
chr2L	+	1555205	1556831
chr2L	+	15765577	15765673
chr2L	+	15765589	15765673
chr2L	-	15908278	15939362
chr2L	-	15908278	15962007
chr2L	-	15940082	15961999
chr2L	-	15940082	15962007
chr2L	+	159817	160007
chr2L	+	159819	160007
chr2L	+	16050272	16056250
chr2L	+	16050710	16056250
chr2L	+	16080196	16080444
chr2L	+	16080196	16080474
chr2L	+	16168604	16169485
chr2L	+	16168604	16169516
chr2L	+	16168612	16169516
chr2L	+	16168648	16169485
chr2L	+	16184379	16184445
chr2L	+	16184386	16184445
chr2L	+	16185626	16186109
chr2L	+	16185626	16187453
chr2L	+	16185626	16189023
chr2L	+	16186151	16189023
chr2L	+	16187840	16189023
chr2L	-	16247384	16247502
chr2L	-	16247384	16248600
chr2L	-	16247764	16248600
chr2L	-	16249142	16250079
chr2L	-	16249706	16250079
chr2L	-	16250158	16251239
chr2L	-	16250158	16251622
chr2L	-	16250158	16253858
chr2L	-	16250158	16257074
chr2L	-	16343304	16344424
chr2L	-	16343304	16351925
chr2L	-	16349472	16349985
chr2L	-	16349472	16351925
chr2L	+	16559944	16597209
chr2L	+	16559944	16652741
chr2L	+	16622841	16652741
chr2L	+	16634776	16652741
chr2L	+	16680276	16690900
chr2L	+	16685941	16690900
chr2L	+	16696762	16697499
chr2L	+	16696769	16697499
chr2L	+	16719976	16722007
chr2L	+	16720082	16722007
chr2L	+	16720168	16722007
chr2L	-	16727488	16727628
chr2L	-	16857993	16858620
chr2L	+	16879920	16880587
chr2L	+	16879920	16881033
chr2L	+	16880660	16881033
chr2L	-	1718491	1718673
chr2L	-	1718491	1718694
chr2L	-	1718491	1718738
chr2L	-	17368388	17372563
chr2L	-	17371820	17372563
chr2L	-	17420113	17432856
chr2L	-	17431340	17432856
chr2L	+	17594547	17600939
chr2L	+	17594996	17597187
chr2L	+	17594996	17600939
chr2L	+	17969518	17971870
chr2L	+	17969518	17972261
chr2L	+	17972003	17972261
chr2L	+	17972018	17972261
chr2L	+	18120072	18123347
chr2L	+	18120204	18123347
chr2L	+	18122588	18123347
chr2L	-	18210145	18210555
chr2L	-	18210148	18210555
chr2L	-	1825901	1825985
chr2L	-	1825904	1825985
chr2L	+	1836652	1837017
chr2L	+	1836652	1837189
chr2L	+	1836652	1842897
chr2L	+	18370656	18381696
chr2L	+	18370656	18391438
chr2L	+	1837406	1842897
chr2L	-	18443070	18443151
chr2L	-	18443073	18443151
chr2L	+	1844720	1848063
chr2L	+	1844720	1851108
chr2L	-	18474582	18474901
chr2L	-	18474582	18475152
chr2L	-	18474956	18475152
chr2L	+	1848213	1851108
chr2L	+	1854308	1855362
chr2L	+	1854308	1855371
chr2L	+	1855475	1855614
chr2L	+	1855475	1856428
chr2L	+	1855797	1856428
chr2L	+	18617724	18631741
chr2L	+	18617724	18649596
chr2L	+	18631774	18649596
chr2L	+	18677472	18677931
chr2L	+	18677472	18678837
chr2L	-	18857403	18857540
chr2L	-	18857403	18857586
chr2L	-	18960680	18962883
chr2L	-	18962791	18962883
chr2L	-	19008543	19008722
chr2L	-	19008543	19008947
chr2L	-	19044083	19044143
chr2L	-	19044083	19044152
chr2L	-	19044303	19044368
chr2L	-	19044317	19044368
chr2L	-	19118128	19119154
chr2L	-	19118128	19120108
chr2L	-	19119241	19119298
chr2L	-	19119241	19119317
chr2L	-	19119474	19119892
chr2L	-	19119474	19120108
chr2L	+	19158755	19166083
chr2L	+	19165988	19166083
chr2L	-	19339651	19339768
chr2L	-	19339651	19339770
chr2L	-	19393656	19398333
chr2L	-	19393656	19398345
chr2L	-	19393656	19398349
chr2L	-	19514350	19514929
chr2L	-	19514852	19514929
chr2L	-	19514859	19514929
chr2L	-	19569226	19571570
chr2L	-	19569226	19577184
chr2L	-	19571767	19572498
chr2L	-	19571767	19577184
chr2L	+	19587086	19600856
chr2L	+	19587527	19600856
chr2L	-	19779330	19779398
chr2L	-	19779333	19779398
chr2L	-	19793402	19794581
chr2L	-	19794308	19794581
chr2L	+	19887320	19907760
chr2L	+	19902187	19907760
chr2L	+	19910432	19925381
chr2L	+	19918585	19925381
chr2L	+	19929354	19950405
chr2L	+	19929354	19954551
chr2L	-	1997958	1998230
chr2L	-	1998068	1998230
chr2L	-	1998720	2000932
chr2L	-	1998720	2002171
chr2L	-	2001511	2002171
chr2L	-	20074128	20074189
chr2L	-	20074128	20074769
chr2L	-	20074336	20074769
chr2L	+	20340112	20343597
chr2L	+	20342481	20343597
chr2L	+	20343947	20344653
chr2L	+	20343947	20345171
chr2L	+	20343947	20345523
chr2L	+	20345259	20345523
chr2L	+	20351286	20353269
chr2L	+	20351286	20354560
chr2L	+	20351286	20354643
chr2L	+	20351286	20361205
chr2L	+	20351286	20363927
chr2L	+	20360812	20361967
chr2L	+	20360812	20364295
chr2L	-	20387592	20399090
chr2L	-	20387592	20399204
chr2L	+	20647788	20648187
chr2L	+	20648013	20648187
chr2L	+	20648013	20648196
chr2L	-	20690061	20692145
chr2L	-	20690061	20692148
chr2L	-	20690061	20692151
chr2L	-	20790720	20791165
chr2L	-	20790720	20791228
chr2L	+	20798514	20813154
chr2L	+	20810373	20813154
chr2L	+	20824493	20825657
chr2L	+	20870760	20870830
chr2L	+	20870772	20870830
chr2L	-	20874432	20875636
chr2L	-	20874432	20876585
chr2L	-	20874432	20876910
chr2L	-	20875724	20876585
chr2L	-	20875724	20876910
chr2L	-	20876616	20876910
chr2L	-	20917120	20917272
chr2L	-	20917120	20918125
chr2L	-	20917120	20918797
chr2L	-	20917144	20918797
chr2L	-	20967746	21051684
chr2L	-	20967746	21051772
chr2L	+	21105008	21105832
chr2L	+	21105008	21114592
chr2L	+	21116482	21117869
chr2L	+	21117711	21117869
chr2L	+	21121739	21122249
chr2L	+	21121769	21122249
chr2L	+	21122389	21122911
chr2L	+	21122389	21124133
chr2L	+	21122927	21124133
chr2L	+	21124373	21124438
chr2L	+	21124373	21124441
chr2L	+	21124521	21125315
chr2L	+	21124521	21125345
chr2L	+	21124614	21125345
chr2L	-	21146885	21146938
chr2L	-	21146885	21146947
chr2L	+	21263123	21263646
chr2L	+	21263179	21263646
chr2L	+	21275806	21279882
chr2L	+	21275806	21281130
chr2L	+	21280447	21281130
chr2L	+	21311017	21311191
chr2L	+	21311032	21311191
chr2L	+	21311032	21311751
chr2L	+	21311531	21311751
chr2L	+	21312043	21312096
chr2L	+	21312043	21312123
chr2L	+	21318416	21318483
chr2L	+	21318419	21318483
chr2L	+	21332026	21338648
chr2L	+	21332026	21339069
chr2L	+	21338676	21339069
chr2L	+	21380361	21382017
chr2L	+	21380361	21382040
chr2L	+	21380361	21382063
chr2L	+	21380361	21382103
chr2L	+	21380365	21382017
chr2L	+	21380478	21382017
chr2L	+	21380478	21382063
chr2L	+	21380600	21382017
chr2L	+	21380728	21382017
chr2L	+	21380728	21382063
chr2L	-	2138155	2139628
chr2L	-	2138158	2138344
chr2L	-	2138158	2139628
chr2L	+	21381668	21382017
chr2L	+	21381668	21382063
chr2L	+	21381668	21382098
chr2L	+	21381788	21382017
chr2L	+	21381832	21381897
chr2L	+	21381832	21382017
chr2L	+	21382330	21384453
chr2L	+	21382330	21384551
chr2L	+	21382330	21388501
chr2L	+	21384595	21385276
chr2L	+	21384595	21385282
chr2L	+	21385397	21388501
chr2L	-	2139673	2139726
chr2L	-	2139676	2139726
chr2L	-	21540089	21540143
chr2L	-	21540089	21540148
chr2L	+	21573561	21574785
chr2L	+	21573729	21574785
chr2L	+	21576186	21576241
chr2L	+	21576186	21576258
chr2L	-	21615676	21616180
chr2L	-	21615676	21617278
chr2L	-	21616573	21617278
chr2L	-	21618110	21618494
chr2L	-	21618153	21618494
chr2L	+	21635210	21635618
chr2L	+	21635210	21637657
chr2L	+	21635731	21637657
chr2L	+	21658854	21659093
chr2L	+	21658961	21659093
chr2L	+	21684146	21684544
chr2L	+	21684339	21684544
chr2L	+	21711410	21712767
chr2L	+	21711680	21712767
chr2L	+	21725445	21727004
chr2L	+	21725445	21728026
chr2L	+	21727573	21728026
chr2L	-	218885	221504
chr2L	-	218885	226114
chr2L	-	2190643	2190705
chr2L	-	2190646	2190705
chr2L	+	22146996	22154796
chr2L	+	22153706	22154796
chr2L	+	22158721	22160206
chr2L	+	22158721	22161676
chr2L	+	22160339	22161676
chr2L	+	22160349	22161676
chr2L	-	22167238	22167301
chr2L	-	22167253	22167301
chr2L	+	2220951	2223241
chr2L	+	2222298	2223241
chr2L	+	22240103	22240152
chr2L	+	22240103	22240168
chr2L	+	22250314	22250370
chr2L	+	22250314	22250431
chr2L	+	22253921	22256774
chr2L	+	22253921	22257651
chr2L	+	22364294	22365191
chr2L	+	22364394	22365191
chr2L	-	22428749	22428845
chr2L	-	22428786	22428845
chr2L	-	22429110	22429267
chr2L	-	22429110	22429351
chr2L	-	22429297	22429351
chr2L	+	22431300	22431357
chr2L	+	22431300	22432683
chr2L	+	22477414	22477472
chr2L	+	22477414	22477475
chr2L	-	22690835	22690904
chr2L	-	22690854	22690904
chr2L	+	22737579	22741700
chr2L	+	22737579	22741944
chr2L	+	22741824	22741944
chr2L	+	22832272	22832325
chr2L	+	22832272	22832332
chr2L	+	22832741	22832803
chr2L	+	22832745	22832803
chr2L	-	229382	229928
chr2L	-	229382	230536
chr2L	-	22960833	22960930
chr2L	-	22960876	22960930
chr2L	-	229977	230536
chr2L	-	231034	231946
chr2L	-	231034	231961
chr2L	-	2360393	2360454
chr2L	-	2360393	2360458
chr2L	-	2361585	2363403
chr2L	-	2361585	2364593
chr2L	-	2361585	2364639
chr2L	-	2361585	2364888
chr2L	-	2361585	2365059
chr2L	+	2365728	2366273
chr2L	+	2365901	2366273
chr2L	-	242744	249004
chr2L	-	242744	250755
chr2L	+	2752711	2753370
chr2L	+	2752840	2753370
chr2L	+	2756170	2756243
chr2L	-	2782839	2783039
chr2L	-	2782940	2783039
chr2L	-	2787162	2792193
chr2L	-	2787168	2789345
chr2L	-	2787168	2792193
chr2L	-	2791304	2792193
chr2L	-	2793264	2793326
chr2L	-	2793270	2793326
chr2L	-	2793908	2798484
chr2L	-	2793908	2799907
chr2L	-	2798836	2799907
chr2L	-	284968	285431
chr2L	-	284968	290811
chr2L	+	2857576	2859623
chr2L	+	2857576	2864967
chr2L	+	2859714	2864967
chr2L	-	2882833	2882918
chr2L	-	2882833	2884991
chr2L	+	2886133	2890375
chr2L	+	2886578	2889672
chr2L	+	2888598	2889672
chr2L	+	2888598	2890375
chr2L	+	2888598	2890448
chr2L	+	2889866	2890375
chr2L	+	2889866	2890448
chr2L	+	2890916	2924912
chr2L	+	2890916	2929982
chr2L	+	2890916	2946707
chr2L	-	291031	291605
chr2L	-	291031	291639
chr2L	-	291031	291659
chr2L	+	2915134	2929982
chr2L	+	2957051	2960688
chr2L	+	2957264	2960688
chr2L	+	2957264	2961216
chr2L	+	2959520	2960688
chr2L	+	2960986	2961216
chr2L	+	2961996	2962584
chr2L	+	2962286	2962584
chr2L	+	3056648	3059603
chr2L	+	3056924	3059603
chr2L	+	3057110	3059603
chr2L	+	306389	317741
chr2L	-	3081268	3089833
chr2L	-	3081268	3094215
chr2L	+	310605	317741
chr2L	+	343729	344022
chr2L	+	343729	344040
chr2L	+	344489	344553
chr2L	+	344489	344574
chr2L	-	3502123	3502414
chr2L	-	3502126	3502414
chr2L	-	3506756	3507187
chr2L	-	3506756	3507194
chr2L	+	3723764	3724882
chr2L	+	3723764	3725654
chr2L	+	3723764	3726677
chr2L	+	3759154	3759667
chr2L	+	3759154	3760066
chr2L	+	3759806	3760066
chr2L	+	3760517	3760691
chr2L	+	3760553	3760691
chr2L	+	3803730	3806967
chr2L	+	3806821	3806967
chr2L	-	3883981	3888267
chr2L	-	3887799	3893260
chr2L	-	3889784	3893260
chr2L	-	3911336	3914726
chr2L	-	3911336	3916779
chr2L	-	4190824	4192631
chr2L	-	4190824	4193308
chr2L	-	4196779	4197145
chr2L	-	4196779	4197963
chr2L	+	4227749	4227826
chr2L	+	4227749	4228010
chr2L	+	4227956	4228010
chr2L	+	4299177	4303334
chr2L	+	4299189	4303334
chr2L	+	4318708	4318905
chr2L	+	4318708	4318946
chr2L	-	4439386	4441049
chr2L	-	4439486	4441049
chr2L	-	4439486	4441156
chr2L	-	4455738	4455855
chr2L	-	4455738	4456112
chr2L	-	4456075	4456384
chr2L	-	4456332	4456384
chr2L	-	4456520	4456722
chr2L	-	4456520	4456724
chr2L	-	4458057	4458161
chr2L	-	4458057	4458287
chr2L	+	457562	457613
chr2L	+	457562	457626
chr2L	-	4737211	4737361
chr2L	-	4737285	4737361
chr2L	-	4738454	4793636
chr2L	+	474765	475034
chr2L	+	474976	475034
chr2L	-	4773557	4793636
chr2L	+	4823235	4825606
chr2L	+	4823235	4826445
chr2L	+	4825711	4826445
chr2L	+	4853016	4854396
chr2L	+	4853016	4854433
chr2L	+	4872693	4873816
chr2L	+	4872693	4873870
chr2L	+	4874169	4874540
chr2L	+	4874169	4874885
chr2L	+	4874562	4874885
chr2L	-	4879196	4880292
chr2L	-	4879196	4880376
chr2L	-	4882492	4882863
chr2L	-	4882492	4882887
chr2L	+	492041	533889
chr2L	+	492041	533892
chr2L	-	4948559	4948896
chr2L	-	4948771	4948896
chr2L	+	4987240	4987905
chr2L	+	4987318	4987905
chr2L	-	4994994	4997112
chr2L	-	4994994	5004170
chr2L	-	4994994	5004612
chr2L	-	5004207	5004612
chr2L	-	5004207	5008179
chr2L	-	5041539	5041687
chr2L	-	5041539	5041696
chr2L	-	5042884	5042959
chr2L	-	5042887	5042959
chr2L	-	5042890	5042959
chr2L	-	5042890	5042963
chr2L	-	5042890	5042982
chr2L	-	5042890	5043076
chr2L	-	5043016	5043076
chr2L	+	5043383	5044305
chr2L	+	5043383	5044321
chr2L	+	5043383	5044581
chr2L	+	5043383	5045820
chr2L	+	5044689	5045820
chr2L	+	5045483	5045820
chr2L	+	5063210	5066868
chr2L	+	5064581	5066868
chr2L	+	5068394	5069125
chr2L	+	5068394	5070095
chr2L	+	5069219	5070095
chr2L	-	5075829	5077533
chr2L	-	5077257	5077533
chr2L	+	5096700	5097031
chr2L	+	5096700	5097034
chr2L	+	5144785	5146991
chr2L	+	5146703	5146991
chr2L	+	5203742	5204449
chr2L	+	5203742	5204461
chr2L	+	5204592	5204834
chr2L	+	5204592	5204873
chr2L	-	5219107	5228765
chr2L	+	5306166	5307563
chr2L	+	5327286	5327501
chr2L	+	5327350	5327501
chr2L	-	542346	542428
chr2L	-	542350	542428
chr2L	-	542379	542428
chr2L	-	5540300	5540423
chr2L	-	5540300	5540970
chr2L	+	5851826	5852882
chr2L	+	5851826	5852991
chr2L	+	5852898	5852991
chr2L	-	5923479	5923530
chr2L	-	5923479	5923532
chr2L	+	5952627	5952987
chr2L	+	5952627	5953414
chr2L	+	5953057	5953414
chr2L	-	5976782	5979410
chr2L	-	5979704	5979817
chr2L	-	5979704	5979938
chr2L	-	5979704	5980638
chr2L	-	5979704	5980733
chr2L	-	5979704	5980845
chr2L	-	5979704	5980949
chr2L	-	5979704	5980951
chr2L	+	5981835	5983008
chr2L	+	5982821	5983008
chr2L	+	5985220	5985337
chr2L	+	5985220	5985341
chr2L	+	5986892	5987614
chr2L	+	5987494	5987614
chr2L	-	5996531	5999296
chr2L	+	6072676	6072732
chr2L	+	6072676	6072742
chr2L	+	6083740	6092993
chr2L	+	6092244	6092993
chr2L	+	6110224	6113028
chr2L	+	6110224	6121772
chr2L	+	6113113	6121772
chr2L	+	6122410	6122696
chr2L	+	6122410	6122976
chr2L	+	6122853	6122976
chr2L	+	6330886	6331042
chr2L	+	6330886	6331045
chr2L	+	6343069	6344157
chr2L	+	6343941	6344157
chr2L	+	6457916	6458085
chr2L	+	6457916	6458169
chr2L	+	6458095	6458151
chr2L	+	6458095	6458169
chr2L	+	6611268	6612483
chr2L	+	6611611	6612483
chr2L	-	6640203	6640355
chr2L	-	6640215	6640355
chr2L	-	6646947	6647919
chr2L	-	6646947	6647949
chr2L	-	6646947	6649028
chr2L	-	6678224	6678910
chr2L	-	6678224	6679984
chr2L	-	6678756	6678910
chr2L	-	6678933	6679984
chr2L	-	6679262	6679984
chr2L	-	6680524	6680669
chr2L	-	6680524	6680945
chr2L	-	6680542	6680669
chr2L	-	6680542	6680945
chr2L	-	6680706	6680945
chr2L	+	6777734	6777794
chr2L	+	6777734	6777797
chr2L	-	6791841	6793226
chr2L	-	6791841	6796335
chr2L	-	6793404	6794327
chr2L	-	6793404	6794491
chr2L	+	6920861	6922729
chr2L	+	6920861	6922733
chr2L	+	6920861	6923782
chr2L	+	6921073	6922729
chr2L	+	6921440	6922729
chr2L	+	6921440	6922733
chr2L	+	6922826	6923782
chr2L	-	6969607	6970092
chr2L	-	6969607	6971488
chr2L	-	7032177	7032309
chr2L	-	7032177	7032320
chr2L	+	7033018	7033181
chr2L	+	7033018	7034197
chr2L	+	7033018	7034482
chr2L	+	7033018	7035073
chr2L	+	7033018	7035405
chr2L	+	7034273	7034482
chr2L	+	7034910	7035405
chr2L	+	7034912	7035405
chr2L	+	7041159	7051365
chr2L	+	7049725	7051365
chr2L	+	7182899	7183161
chr2L	+	7182899	7183501
chr2L	+	7183322	7183501
chr2L	+	7183322	7183776
chr2L	+	7183665	7183776
chr2L	+	7184203	7184384
chr2L	+	7184203	7184613
chr2L	+	7184394	7184613
chr2L	-	7196857	7203933
chr2L	-	7196857	7203937
chr2L	-	7223697	7225604
chr2L	-	7223697	7227102
chr2L	-	7225061	7225604
chr2L	-	7225856	7227102
chr2L	+	72977	74901
chr2L	+	72977	75076
chr2L	+	73692	73818
chr2L	+	73692	74901
chr2L	+	73692	75076
chr2L	-	738435	738502
chr2L	-	738435	738506
chr2L	+	73897	74901
chr2L	+	7428679	7428876
chr2L	+	7428679	7428924
chr2L	+	74572	74901
chr2L	+	74572	75076
chr2L	-	7480323	7480559
chr2L	-	7480326	7480559
chr2L	-	7483627	7492183
chr2L	-	7483627	7495511
chr2L	-	7492226	7495511
chr2L	+	75018	75076
chr2L	-	7646010	7648745
chr2L	-	7647266	7648745
chr2L	-	7647509	7648745
chr2L	-	7651743	7655052
chr2L	-	7651743	7655543
chr2L	-	7661774	7662787
chr2L	-	7661774	7674437
chr2L	-	7662874	7674437
chr2L	+	7773658	7774199
chr2L	+	7773658	7774223
chr2L	-	7826336	7826532
chr2L	-	7826336	7826768
chr2L	+	7828153	7830460
chr2L	+	7828668	7830460
chr2L	+	7985433	7985551
chr2L	+	7985441	7985551
chr2L	+	8029733	8029781
chr2L	+	8029733	8029814
chr2L	+	8030839	8032058
chr2L	+	8031308	8032058
chr2L	+	8036298	8036356
chr2L	+	8036298	8036380
chr2L	+	8036576	8037088
chr2L	+	8036893	8037088
chr2L	-	8042613	8042690
chr2L	-	8042613	8042821
chr2L	+	8083457	8089183
chr2L	+	8083521	8089183
chr2L	+	8083521	8089392
chr2L	+	8083587	8089183
chr2L	+	8083636	8089183
chr2L	+	8084058	8089183
chr2L	+	8084266	8089183
chr2L	+	8088453	8088608
chr2L	+	8088453	8089183
chr2L	+	8089736	8102298
chr2L	+	8089736	8105690
chr2L	+	8103503	8105690
chr2L	+	8107880	8109814
chr2L	+	8107880	8110479
chr2L	+	8110216	8110479
chr2L	-	8140778	8156519
chr2L	-	8140778	8159217
chr2L	-	8193229	8193670
chr2L	-	8193229	8194043
chr2L	+	8200280	8200344
chr2L	+	8200280	8200349
chr2L	+	824137	824189
chr2L	+	824137	824217
chr2L	+	826507	829303
chr2L	+	826507	829455
chr2L	+	8304577	8304660
chr2L	+	8304577	8304842
chr2L	+	8304772	8304842
chr2L	+	8386385	8386473
chr2L	+	8386385	8386482
chr2L	+	8386385	8386485
chr2L	+	8428067	8428318
chr2L	+	8428067	8430279
chr2L	+	8429462	8430279
chr2L	-	8493092	8493742
chr2L	-	8493092	8493745
chr2L	-	8506706	8506791
chr2L	-	8506706	8506800
chr2L	+	8543477	8544542
chr2L	+	8543674	8544542
chr2L	+	8543715	8544542
chr2L	+	8663251	8664156
chr2L	+	8663251	8665444
chr2L	+	8663251	8666034
chr2L	+	8664220	8665444
chr2L	+	8664220	8666034
chr2L	+	8665518	8666034
chr2L	+	870552	871339
chr2L	+	871274	871339
chr2L	-	8945534	8950768
chr2L	-	8945534	8950976
chr2L	+	9162708	9163139
chr2L	+	9162708	9163293
chr2L	+	9167438	9191613
chr2L	+	9176461	9177123
chr2L	+	9176467	9177120
chr2L	+	9176657	9177123
chr2L	+	9176661	9177120
chr2L	+	9176661	9177123
chr2L	+	9176766	9177123
chr2L	+	9177630	9191613
chr2L	+	9243545	9243610
chr2L	+	9243545	9243646
chr2L	+	9256651	9272464
chr2L	+	9256696	9256891
chr2L	+	9256696	9272464
chr2L	+	9257206	9272464
chr2L	-	9493103	9493249
chr2L	-	9493103	9494220
chr2L	-	9553728	9553801
chr2L	-	9553728	9555282
chr2L	-	9554268	9555282
chr2L	-	9556398	9565002
chr2L	-	9556398	9566431
chr2L	-	9556398	9566539
chr2L	-	9556398	9566544
chr2L	-	9685202	9685593
chr2L	-	9685202	9696189
chr2L	-	9698233	9699113
chr2L	-	9698233	9699233
chr2L	-	9714153	9724075
chr2L	-	9714153	9743476
chr2L	-	9718520	9720089
chr2L	-	9718520	9722759
chr2L	-	9720165	9722759
chr2L	-	9722942	9727026
chr2L	-	9722954	9727026
chr2L	-	9722954	9727134
chr2L	-	9727256	9732914
chr2L	-	9727256	9732953
chr2L	-	9798305	9802349
chr2L	-	9798305	9806442
chr2L	-	9798305	9807308
chr2L	-	9802437	9807308
chr2L	-	9806530	9807308
chr2L	-	9815101	9817578
chr2L	-	9815101	9822284
chr2L	-	9815101	9840150
chr2L	-	9815101	9875788
chr2L	-	9815912	9819285
chr2L	-	9815912	9825295
chr2L	-	9819331	9825611
chr2L	-	9825341	9825611
chr2L	-	9877260	9885930
chr2L	-	9877285	9885930
chr2L	-	9877972	9885724
chr2L	-	9877972	9885930
chr2L	-	9878025	9885724
chr2L	-	9878025	9885930
chr2L	-	9935569	9937236
chr2L	-	9936819	9937236
chr2L	-	9961614	9961727
chr2L	-	9961617	9961727
chr2LHet	+	167315	167374
chr2LHet	+	167315	167382
chr2LHet	+	167315	167394
chr2LHet	-	168745	168842
chr2LHet	-	168795	168842
chr2LHet	-	21373	21434
chr2LHet	-	21383	21434
chr2LHet	-	21569	21747
chr2LHet	-	21569	32571
chr2LHet	-	25147	25334
chr2LHet	-	25147	25349
chr2LHet	-	25390	32571
chr2R	-	10037323	10037729
chr2R	-	10037600	10037729
chr2R	+	10058227	10059793
chr2R	+	10058956	10059793
chr2R	+	10064196	10064678
chr2R	+	10064196	10065388
chr2R	+	10064982	10065388
chr2R	+	10065705	10065775
chr2R	+	10065708	10065775
chr2R	+	10066546	10066612
chr2R	+	10066546	10066615
chr2R	-	1009157	1009486
chr2R	-	1009157	1015729
chr2R	-	10103615	10103937
chr2R	-	10103615	10104033
chr2R	-	10119469	10120219
chr2R	-	10119469	10120228
chr2R	-	10121847	10121946
chr2R	-	10121847	10122196
chr2R	-	10122064	10122196
chr2R	+	10163911	10164784
chr2R	+	10163933	10164784
chr2R	+	10164031	10164784
chr2R	+	10164560	10164784
chr2R	+	10167147	10168898
chr2R	+	10167147	10173202
chr2R	+	10167147	10173205
chr2R	+	10179687	10179732
chr2R	+	10179687	10179747
chr2R	+	10179886	10181596
chr2R	+	10179886	10184204
chr2R	+	10181693	10184204
chr2R	+	1035939	1035993
chr2R	+	1035939	1035996
chr2R	-	10491628	10491700
chr2R	-	10491633	10491700
chr2R	-	10641395	10641454
chr2R	-	10641395	10641490
chr2R	-	10650513	10651334
chr2R	-	10650579	10650922
chr2R	-	10650579	10651334
chr2R	+	10658334	10659303
chr2R	+	10659147	10659303
chr2R	-	10753556	10754987
chr2R	-	10753580	10754987
chr2R	-	10836929	10839138
chr2R	-	10836929	10848889
chr2R	-	10840073	10840590
chr2R	-	10840094	10840590
chr2R	+	10927555	10927620
chr2R	+	10927555	10927641
chr2R	+	11027600	11027881
chr2R	+	11027600	11027974
chr2R	+	11043720	11051389
chr2R	+	11043720	11068016
chr2R	+	11052605	11068016
chr2R	+	11052605	11076259
chr2R	+	11068215	11076259
chr2R	+	11091406	11091464
chr2R	-	11121315	11121421
chr2R	-	11121318	11121421
chr2R	-	11122548	11123364
chr2R	-	11122548	11128700
chr2R	-	11124007	11128700
chr2R	-	11124010	11128700
chr2R	-	11154967	11155309
chr2R	-	11154967	11155345
chr2R	-	11155889	11157801
chr2R	-	11157262	11157801
chr2R	-	11159044	11160055
chr2R	-	11159044	11162042
chr2R	-	11160113	11161723
chr2R	-	11160113	11162042
chr2R	-	11161799	11162042
chr2R	+	11199472	11199536
chr2R	+	11199472	11199539
chr2R	+	11210217	11210627
chr2R	+	11210217	11210952
chr2R	+	11210246	11210627
chr2R	+	11210246	11210952
chr2R	+	11210646	11210952
chr2R	+	11289888	11297069
chr2R	+	11289888	11302628
chr2R	+	11298047	11302628
chr2R	+	11311910	11340360
chr2R	+	11314132	11340360
chr2R	+	11340513	11341244
chr2R	+	11340513	11343938
chr2R	+	11341302	11343938
chr2R	+	11344320	11345251
chr2R	+	11344320	11346402
chr2R	+	11344320	11348376
chr2R	+	11344320	11350679
chr2R	+	11345429	11351974
chr2R	+	11346772	11352861
chr2R	+	11348731	11351974
chr2R	+	11352191	11352834
chr2R	+	11352191	11352861
chr2R	+	11352996	11353153
chr2R	+	11353011	11353153
chr2R	-	11407841	11407920
chr2R	-	11407841	11408583
chr2R	-	11407984	11409345
chr2R	-	11408605	11409345
chr2R	-	11455218	11455332
chr2R	-	11455218	11455655
chr2R	-	11455345	11455655
chr2R	+	11502805	11518213
chr2R	-	11824085	11824524
chr2R	-	11824085	11825618
chr2R	-	11824085	11825950
chr2R	-	11824088	11824524
chr2R	-	11824088	11825618
chr2R	-	11824088	11825950
chr2R	-	11825384	11825950
chr2R	+	1182562	1182619
chr2R	+	1182568	1182619
chr2R	-	11825772	11825950
chr2R	-	11914768	11914840
chr2R	-	11914783	11914840
chr2R	+	11919681	11925555
chr2R	+	11919939	11925555
chr2R	+	11990397	11991114
chr2R	+	11990454	11991114
chr2R	+	11990454	11992536
chr2R	+	11990813	11991114
chr2R	+	11990813	11992536
chr2R	+	11991279	11992536
chr2R	+	12020140	12020332
chr2R	+	12020140	12020925
chr2R	+	12020595	12023530
chr2R	+	12021188	12023530
chr2R	+	12066457	12069484
chr2R	+	12066983	12069484
chr2R	+	12068321	12069484
chr2R	+	12069310	12069484
chr2R	+	12084077	12084195
chr2R	+	12084107	12084195
chr2R	-	12093584	12108626
chr2R	-	12093584	12109173
chr2R	-	12108654	12109173
chr2R	-	12114279	12117581
chr2R	-	12114309	12117581
chr2R	-	12214665	12216056
chr2R	-	12214665	12220537
chr2R	-	12216218	12216920
chr2R	-	12216419	12216920
chr2R	-	12217903	12220537
chr2R	-	12220925	12221283
chr2R	-	12220925	12223993
chr2R	+	12495839	12506307
chr2R	+	12496830	12506307
chr2R	+	12500078	12506307
chr2R	+	12505648	12506307
chr2R	+	12529156	12529555
chr2R	+	12529197	12529555
chr2R	+	12531161	12531559
chr2R	+	12531161	12532249
chr2R	+	12531599	12532249
chr2R	+	12532962	12533160
chr2R	+	12532962	12533164
chr2R	-	12641657	12641746
chr2R	-	12641657	12643390
chr2R	-	12641774	12643390
chr2R	-	12643955	12644059
chr2R	-	12643955	12644068
chr2R	-	12645907	12646126
chr2R	-	12645907	12646755
chr2R	-	12646334	12646755
chr2R	-	12648219	12648909
chr2R	-	12648219	12649171
chr2R	-	12648952	12649171
chr2R	-	12650845	12651641
chr2R	-	12650845	12659757
chr2R	-	12650845	12659761
chr2R	-	12651879	12652831
chr2R	-	12651879	12653336
chr2R	-	12653146	12653336
chr2R	+	12671387	12675658
chr2R	+	12671868	12675658
chr2R	+	12677420	12677659
chr2R	+	12677420	12678242
chr2R	+	12677771	12678242
chr2R	+	12746754	12746816
chr2R	+	12746754	12746819
chr2R	+	12812295	12813849
chr2R	+	12812542	12813849
chr2R	+	12861629	12867350
chr2R	+	12861629	12871769
chr2R	+	12867400	12871769
chr2R	+	12874255	12879154
chr2R	+	12874255	12881663
chr2R	+	12879167	12881663
chr2R	-	12898040	12898390
chr2R	-	12898040	12898657
chr2R	-	12898481	12898657
chr2R	-	12900213	12900788
chr2R	-	12900279	12900788
chr2R	-	12902707	12903162
chr2R	-	12902707	12903166
chr2R	-	12906430	12906710
chr2R	-	12906430	12906936
chr2R	-	12906826	12906936
chr2R	-	12906854	12906936
chr2R	+	12938160	12938220
chr2R	+	12938160	12938228
chr2R	+	12938669	12939325
chr2R	+	12938669	12940772
chr2R	+	12940649	12940772
chr2R	-	12977880	12978862
chr2R	-	12977880	12979313
chr2R	-	12979028	12979313
chr2R	+	13104580	13107558
chr2R	+	13104580	13162913
chr2R	+	13107608	13142762
chr2R	+	13107608	13162913
chr2R	+	13153716	13162913
chr2R	+	13239810	13241682
chr2R	+	13239810	13248616
chr2R	+	13239810	13249483
chr2R	+	13249602	13259640
chr2R	+	13249602	13260580
chr2R	+	13249602	13261321
chr2R	+	13259788	13260580
chr2R	+	13260666	13261321
chr2R	+	13308078	13311159
chr2R	+	13309451	13311159
chr2R	+	13345377	13349497
chr2R	+	13346134	13349497
chr2R	+	13348171	13349497
chr2R	+	13360309	13360590
chr2R	+	13360314	13360590
chr2R	-	13408433	13409209
chr2R	-	13408433	13409335
chr2R	-	13408433	13410356
chr2R	-	13409405	13410356
chr2R	-	13409405	13411003
chr2R	-	13411076	13411587
chr2R	-	13411403	13411587
chr2R	-	13415610	13418550
chr2R	-	13416696	13418550
chr2R	-	13417639	13418550
chr2R	+	13450043	13450163
chr2R	+	13450043	13450461
chr2R	-	13535468	13536443
chr2R	-	13535468	13536567
chr2R	+	13557137	13557190
chr2R	+	13557137	13557646
chr2R	+	13557387	13557646
chr2R	+	13586949	13587361
chr2R	+	13586954	13587361
chr2R	+	13587402	13587584
chr2R	+	13587402	13587588
chr2R	+	13587402	13587885
chr2R	+	13587690	13587885
chr2R	+	13685366	13685428
chr2R	+	13685366	13685431
chr2R	-	13755064	13755286
chr2R	-	13755064	13755790
chr2R	+	13791184	13795150
chr2R	+	13791184	13795165
chr2R	-	14007905	14007970
chr2R	-	14007908	14007970
chr2R	-	14018550	14018639
chr2R	-	14018550	14018785
chr2R	-	14018694	14018785
chr2R	+	14028459	14028991
chr2R	+	14028921	14028991
chr2R	+	14032779	14032845
chr2R	+	14032783	14032845
chr2R	-	14043670	14044073
chr2R	-	14043670	14045188
chr2R	-	14043670	14045263
chr2R	-	14043670	14045284
chr2R	-	14043670	14045349
chr2R	-	14043670	14045445
chr2R	-	14043670	14045476
chr2R	-	14058824	14058896
chr2R	-	14058824	14059941
chr2R	-	14243560	14244641
chr2R	-	14243560	14244714
chr2R	+	14309058	14311372
chr2R	+	14309058	14311630
chr2R	+	14311376	14311472
chr2R	+	14311376	14311630
chr2R	+	14311512	14311630
chr2R	+	14311991	14312110
chr2R	+	14311991	14312375
chr2R	+	14312171	14312375
chr2R	+	14312539	14312843
chr2R	+	14312581	14312843
chr2R	-	14325117	14325443
chr2R	-	14325117	14325711
chr2R	-	14325482	14325711
chr2R	+	14334210	14334267
chr2R	-	14345103	14345398
chr2R	-	14345103	14348069
chr2R	-	14345103	14348415
chr2R	-	14348149	14348415
chr2R	-	14384373	14385345
chr2R	-	14384410	14385208
chr2R	-	14384410	14385259
chr2R	-	14384410	14385345
chr2R	-	14384912	14385208
chr2R	-	14385026	14385208
chr2R	+	14410225	14410476
chr2R	+	14410225	14411736
chr2R	+	14411212	14411736
chr2R	+	14427798	14431414
chr2R	+	14427798	14431417
chr2R	+	14433686	14433760
chr2R	+	14433686	14434353
chr2R	+	14433862	14434353
chr2R	-	14520488	14520557
chr2R	-	14520491	14520557
chr2R	-	14520629	14520695
chr2R	-	14520632	14520695
chr2R	-	14521790	14523646
chr2R	-	14522446	14523646
chr2R	+	14575873	14579544
chr2R	+	14576016	14579544
chr2R	+	14576055	14579544
chr2R	+	14576246	14579544
chr2R	-	14616251	14616346
chr2R	-	14616291	14616346
chr2R	+	14708788	14708993
chr2R	+	14708788	14708996
chr2R	+	14708788	14709479
chr2R	-	14859268	14859332
chr2R	-	14859280	14859332
chr2R	-	1491916	1491971
chr2R	-	1491916	1492020
chr2R	-	1492021	1492086
chr2R	-	1492021	1492114
chr2R	-	1492021	1492213
chr2R	-	1492155	1492213
chr2R	+	1496302	1496516
chr2R	+	1496340	1496516
chr2R	+	1496994	1497567
chr2R	+	1496994	1498695
chr2R	+	1497761	1498695
chr2R	+	15025766	15026644
chr2R	+	15025766	15027197
chr2R	+	15026854	15027197
chr2R	+	15046857	15047286
chr2R	+	15046857	15047298
chr2R	+	15047540	15047680
chr2R	+	15047540	15047683
chr2R	+	15047540	15047752
chr2R	+	15048920	15048976
chr2R	+	15048920	15048979
chr2R	+	15061626	15061842
chr2R	+	15061626	15062080
chr2R	+	15061870	15062080
chr2R	+	15062753	15063691
chr2R	+	15062753	15063769
chr2R	+	15062813	15063691
chr2R	+	15062813	15063751
chr2R	+	15062813	15063769
chr2R	+	15063364	15063751
chr2R	+	15064248	15064444
chr2R	+	15064248	15065322
chr2R	+	15065078	15065322
chr2R	+	15105699	15108247
chr2R	+	15105699	15110743
chr2R	+	15108287	15110743
chr2R	+	15124568	15124831
chr2R	+	15124568	15125245
chr2R	+	15124946	15125655
chr2R	+	15125276	15125655
chr2R	+	15125939	15128719
chr2R	+	15125939	15129677
chr2R	+	15129290	15129677
chr2R	+	15129900	15130207
chr2R	+	15130090	15130207
chr2R	-	15197088	15197166
chr2R	-	15197088	15197319
chr2R	-	15197203	15197319
chr2R	-	15286598	15293523
chr2R	-	15286598	15294118
chr2R	-	15286598	15295344
chr2R	-	15306110	15311097
chr2R	-	15306110	15312326
chr2R	-	15311302	15312326
chr2R	-	1531546	1535225
chr2R	-	1531546	1540002
chr2R	+	15316049	15316740
chr2R	+	15316138	15316740
chr2R	+	15330603	15330663
chr2R	+	15330603	15330816
chr2R	+	15330744	15330816
chr2R	-	15332884	15333222
chr2R	-	15332884	15333431
chr2R	-	15336251	15336730
chr2R	-	15336251	15338936
chr2R	-	1535329	1540002
chr2R	+	15359241	15360322
chr2R	+	15359250	15360322
chr2R	+	15360669	15360943
chr2R	+	15360684	15360943
chr2R	+	15361472	15362031
chr2R	+	15361472	15365137
chr2R	+	15361472	15366255
chr2R	+	15362146	15366255
chr2R	+	15366370	15368654
chr2R	+	15366370	15370455
chr2R	-	15418205	15419673
chr2R	-	15418205	15419679
chr2R	-	15425716	15433515
chr2R	-	15425716	15451944
chr2R	-	15425716	15451965
chr2R	-	15425716	15461491
chr2R	-	15425716	15461506
chr2R	-	15433564	15451944
chr2R	-	15433564	15461506
chr2R	-	15452017	15461491
chr2R	-	15452017	15461506
chr2R	-	15516575	15517987
chr2R	-	15516575	15518356
chr2R	-	15516575	15518540
chr2R	+	1556013	1556179
chr2R	+	1556013	1556296
chr2R	+	1589798	1590370
chr2R	+	1589893	1590370
chr2R	-	16143314	16143389
chr2R	-	16143314	16143586
chr2R	-	16143540	16143939
chr2R	-	16143740	16143939
chr2R	-	16194141	16195650
chr2R	-	16194141	16196064
chr2R	+	16211916	16212001
chr2R	+	16211916	16212351
chr2R	+	16214898	16215370
chr2R	+	16214898	16215830
chr2R	+	16215639	16215830
chr2R	+	16475249	16477120
chr2R	+	16475249	16483060
chr2R	+	16477172	16483060
chr2R	+	16483319	16485051
chr2R	+	16483319	16485956
chr2R	+	16485096	16485956
chr2R	+	16486199	16492199
chr2R	+	16490653	16492199
chr2R	+	16493356	16493947
chr2R	+	16493381	16493947
chr2R	+	16528623	16528669
chr2R	+	16528623	16528672
chr2R	+	16528623	16528684
chr2R	+	1658361	1659419
chr2R	+	16599274	16631681
chr2R	+	16604526	16631681
chr2R	+	16619857	16631681
chr2R	+	16621444	16631681
chr2R	+	16621444	16637187
chr2R	+	16908822	16909004
chr2R	+	16908822	16910568
chr2R	+	16909026	16909389
chr2R	+	16909026	16910568
chr2R	+	16909638	16910937
chr2R	+	16910670	16910937
chr2R	+	16911091	16911165
chr2R	+	16911091	16911479
chr2R	+	16911259	16911479
chr2R	+	1692959	1703960
chr2R	+	1692959	1719850
chr2R	-	16959308	16960228
chr2R	+	17009408	17009504
chr2R	+	17009435	17009504
chr2R	-	17014638	17014905
chr2R	-	17014638	17015905
chr2R	-	17044802	17045718
chr2R	-	17044802	17047600
chr2R	-	17044802	17047932
chr2R	+	17067101	17067441
chr2R	+	17067149	17067441
chr2R	+	17093319	17094380
chr2R	+	17093319	17095973
chr2R	+	17095017	17095973
chr2R	+	17143808	17151568
chr2R	+	17143808	17158264
chr2R	+	17152038	17158264
chr2R	+	17181294	17181353
chr2R	+	17181294	17181557
chr2R	+	17181379	17181557
chr2R	-	17282550	17285568
chr2R	-	17282550	17286390
chr2R	-	17282550	17286678
chr2R	-	17286609	17286678
chr2R	-	17299923	17304383
chr2R	-	17299923	17367594
chr2R	-	17348864	17367594
chr2R	-	17382831	17384567
chr2R	-	17382831	17385284
chr2R	+	17389984	17397609
chr2R	+	17389984	17397621
chr2R	+	17389984	17398370
chr2R	+	17397706	17398370
chr2R	+	17399682	17401020
chr2R	+	17399682	17401712
chr2R	+	17399682	17403391
chr2R	+	1741291	1743018
chr2R	+	1741306	1743018
chr2R	-	17493698	17493971
chr2R	-	17493865	17493971
chr2R	+	17540068	17540416
chr2R	+	17540068	17540722
chr2R	+	17540068	17542278
chr2R	+	17541568	17542278
chr2R	+	17545614	17545849
chr2R	+	17545614	17545854
chr2R	+	17545685	17545849
chr2R	+	17545685	17545854
chr2R	+	17545780	17545849
chr2R	+	17545780	17545854
chr2R	-	17586105	17590176
chr2R	-	17586105	17590180
chr2R	-	17586105	17591826
chr2R	+	1796218	1797304
chr2R	-	17996285	17996354
chr2R	-	17996285	17997090
chr2R	-	17997865	17998049
chr2R	-	17997865	17998831
chr2R	-	18222469	18223184
chr2R	-	18222469	18226304
chr2R	-	18223297	18226304
chr2R	-	18225417	18226304
chr2R	-	18232798	18233547
chr2R	-	18232798	18234151
chr2R	-	18232798	18247757
chr2R	-	18233864	18234151
chr2R	-	18234214	18241891
chr2R	-	18234214	18247757
chr2R	+	18291965	18294547
chr2R	+	18294319	18294547
chr2R	+	18296228	18296286
chr2R	-	18448647	18449422
chr2R	-	18448647	18449437
chr2R	+	18509805	18515303
chr2R	+	18509805	18515309
chr2R	-	18609532	18611440
chr2R	-	18610409	18611440
chr2R	-	18632223	18632548
chr2R	-	18632241	18632548
chr2R	-	1867142	1867204
chr2R	-	1867142	1867546
chr2R	+	18761159	18761349
chr2R	+	18761169	18761349
chr2R	+	18764370	18764423
chr2R	+	18764370	18764435
chr2R	+	18767493	18767999
chr2R	+	18767565	18767654
chr2R	+	18767565	18767999
chr2R	+	18767741	18767999
chr2R	-	18769443	18769511
chr2R	-	18769443	18769923
chr2R	-	18772184	18772241
chr2R	-	18772187	18772241
chr2R	+	18773	18825
chr2R	+	18773	18868
chr2R	+	18774771	18774828
chr2R	+	18774771	18774831
chr2R	+	18815152	18816609
chr2R	+	18815152	18817320
chr2R	+	18955361	18955468
chr2R	+	18955364	18955468
chr2R	+	1897006	1897301
chr2R	+	1897006	1897882
chr2R	+	1897329	1897882
chr2R	+	1898273	1898435
chr2R	+	1898273	1898444
chr2R	-	1925951	1927585
chr2R	-	1925951	1927729
chr2R	-	19270645	19270841
chr2R	-	19270645	19270886
chr2R	-	19281003	19282438
chr2R	-	19281003	19283950
chr2R	-	19588113	19588322
chr2R	-	19588113	19589632
chr2R	-	19588392	19589632
chr2R	+	19595997	19596151
chr2R	+	19595997	19596156
chr2R	+	19596010	19596151
chr2R	+	19596010	19596156
chr2R	-	1968539	1969239
chr2R	-	1968920	1969239
chr2R	-	19699247	19699316
chr2R	-	19699260	19699316
chr2R	-	1971512	1971672
chr2R	-	1971512	1972011
chr2R	-	1971895	1972011
chr2R	-	1972524	1972589
chr2R	-	1972536	1972589
chr2R	-	19747350	19747408
chr2R	-	19747350	19747878
chr2R	-	19748980	19749782
chr2R	-	19748980	19750011
chr2R	-	19748983	19749782
chr2R	-	19748983	19750011
chr2R	+	19810552	19810861
chr2R	+	19810552	19811523
chr2R	+	19810552	19811937
chr2R	+	19810916	19811523
chr2R	+	19811617	19811937
chr2R	-	19820337	19820764
chr2R	-	19820337	19820780
chr2R	+	19830124	19831751
chr2R	+	19830337	19831751
chr2R	-	19874932	19874984
chr2R	-	19874932	19874988
chr2R	+	19911943	19912421
chr2R	+	19912128	19912421
chr2R	+	19921943	19922209
chr2R	+	19921955	19922209
chr2R	+	19945425	19946005
chr2R	+	19945429	19946005
chr2R	+	19951096	19952255
chr2R	+	19952180	19952255
chr2R	-	19953836	19954082
chr2R	-	19953836	19954684
chr2R	+	19957765	19958289
chr2R	+	19957765	19959512
chr2R	+	19957765	19959516
chr2R	+	19958527	19960226
chr2R	+	19959747	19960226
chr2R	+	20007129	20007417
chr2R	+	20007129	20008233
chr2R	+	20007777	20008233
chr2R	-	20046539	20046670
chr2R	-	20046608	20046666
chr2R	-	20046608	20046670
chr2R	-	20272571	20277115
chr2R	-	20272571	20277119
chr2R	-	20286706	20287367
chr2R	-	20286706	20287371
chr2R	+	20419159	20419961
chr2R	+	20419257	20419961
chr2R	+	20419901	20419961
chr2R	+	20443094	20445551
chr2R	+	20445222	20445551
chr2R	-	20498805	20501435
chr2R	-	20498805	20502250
chr2R	-	20503722	20508223
chr2R	-	20503722	20508869
chr2R	-	20503722	20511194
chr2R	-	20508590	20508869
chr2R	-	20509174	20511194
chr2R	-	20509382	20511194
chr2R	-	20512842	20524804
chr2R	-	20512842	20525988
chr2R	-	20524996	20525988
chr2R	-	20525001	20525988
chr2R	-	20580992	20581792
chr2R	-	20581179	20581792
chr2R	-	20673206	20673257
chr2R	-	20673206	20673263
chr2R	-	20763182	20763286
chr2R	+	20779215	20779805
chr2R	+	20779215	20779923
chr2R	+	20779243	20779923
chr2R	+	20779360	20779923
chr2R	+	20803354	20804841
chr2R	+	20804413	20804841
chr2R	+	20826365	20826477
chr2R	+	20826365	20826495
chr2R	+	20826740	20826792
chr2R	+	20826740	20826795
chr2R	-	20828577	20828633
chr2R	-	20828577	20828643
chr2R	-	20878795	20879086
chr2R	-	20878795	20879331
chr2R	-	20879221	20879331
chr2R	-	20898139	20898833
chr2R	-	20898139	20898897
chr2R	+	20899700	20900154
chr2R	+	20899731	20900154
chr2R	+	20924235	20924370
chr2R	+	20924298	20924370
chr2R	+	20925053	20925223
chr2R	+	20925053	20926572
chr2R	+	20925487	20926572
chr2R	+	20925493	20926572
chr2R	+	20925506	20926572
chr2R	-	20960726	20960799
chr2R	-	20960737	20960799
chr2R	-	2098330	2099099
chr2R	-	2098360	2099099
chr2R	-	238272	238610
chr2R	-	238272	238621
chr2R	-	2519645	2519809
chr2R	-	2519645	2519827
chr2R	-	2519645	2520498
chr2R	+	2549941	2550072
chr2R	+	2549953	2550072
chr2R	+	2556729	2556833
chr2R	+	2556737	2556833
chr2R	+	2563417	2579201
chr2R	+	2579139	2579201
chr2R	+	2579330	2579385
chr2R	+	2579330	2579392
chr2R	-	2583336	2583395
chr2R	-	2583348	2583395
chr2R	+	2584434	2584919
chr2R	+	2584434	2585552
chr2R	+	2584507	2584919
chr2R	+	2585080	2585552
chr2R	+	2632044	2632102
chr2R	+	2632044	2632106
chr2R	+	2640493	2640576
chr2R	+	2640493	2640730
chr2R	+	2640493	2641683
chr2R	+	2640493	2642205
chr2R	+	2641008	2641683
chr2R	+	2641008	2642205
chr2R	+	2641008	2642208
chr2R	+	2641943	2642205
chr2R	+	2641943	2642208
chr2R	+	2642622	2642688
chr2R	+	2642631	2642688
chr2R	-	266660	280942
chr2R	-	266660	295484
chr2R	-	2680126	2684409
chr2R	-	2684283	2684409
chr2R	-	2684917	2686273
chr2R	-	2684917	2686290
chr2R	+	2695322	2695593
chr2R	+	2695488	2695593
chr2R	+	2701258	2701540
chr2R	+	2701258	2702563
chr2R	-	2751038	2751781
chr2R	-	2751059	2751781
chr2R	-	2764031	2764099
chr2R	-	2764031	2764724
chr2R	-	2764238	2764724
chr2R	-	2764627	2764724
chr2R	-	280188	295484
chr2R	-	281049	295484
chr2R	-	2814326	2814893
chr2R	-	2814326	2816012
chr2R	-	2816341	2817752
chr2R	-	2817603	2817752
chr2R	-	2866102	2872915
chr2R	-	2870254	2872915
chr2R	+	2875770	2876074
chr2R	+	2875770	2876086
chr2R	+	2899840	2900536
chr2R	+	2900058	2900536
chr2R	+	2900621	2904516
chr2R	+	2901154	2904516
chr2R	-	295537	315439
chr2R	-	295537	336882
chr2R	-	3208269	3208870
chr2R	-	3208269	3209886
chr2R	-	3209154	3209886
chr2R	-	3210837	3212073
chr2R	-	3210837	3212085
chr2R	-	3212233	3214120
chr2R	-	3212242	3213655
chr2R	-	3212242	3214120
chr2R	-	3213869	3216792
chr2R	-	3214289	3216792
chr2R	-	3223915	3235352
chr2R	-	3227575	3235352
chr2R	-	3236480	3237104
chr2R	-	3236480	3239202
chr2R	-	3236480	3244248
chr2R	-	3236480	3244903
chr2R	-	3236480	3245094
chr2R	-	3236480	3246519
chr2R	-	3236480	3247170
chr2R	-	3249372	3250527
chr2R	-	3249372	3250835
chr2R	-	3249372	3251098
chr2R	-	3249372	3251681
chr2R	-	3249372	3251959
chr2R	-	3249372	3254308
chr2R	-	3251853	3255891
chr2R	-	3252684	3255891
chr2R	-	3254132	3255891
chr2R	+	3277015	3277472
chr2R	+	3277015	3277581
chr2R	-	3280009	3280381
chr2R	-	3280021	3280381
chr2R	-	3294565	3294713
chr2R	-	3294565	3295243
chr2R	-	3354555	3354986
chr2R	-	3354821	3354977
chr2R	-	3354821	3354986
chr2R	-	3355331	3355925
chr2R	-	3355331	3356613
chr2R	-	3358387	3360791
chr2R	-	3358387	3361225
chr2R	-	3360851	3361225
chr2R	-	3361348	3361508
chr2R	-	3361348	3362845
chr2R	-	3415481	3416531
chr2R	-	3415481	3420256
chr2R	-	3565239	3565402
chr2R	-	3565239	3566073
chr2R	-	3565909	3566073
chr2R	-	3607501	3609537
chr2R	-	3607501	3613192
chr2R	-	3617213	3622657
chr2R	-	3617213	3622880
chr2R	-	3629425	3632383
chr2R	-	3629425	3641013
chr2R	-	3629425	3645538
chr2R	-	3641073	3645538
chr2R	-	3692443	3692925
chr2R	-	3692443	3693729
chr2R	+	3808289	3808507
chr2R	+	3808449	3808507
chr2R	-	3817894	3817950
chr2R	-	3817894	3817955
chr2R	-	3836025	3841405
chr2R	-	3836025	3842816
chr2R	-	3841816	3842816
chr2R	-	3859034	3859140
chr2R	-	3859069	3859140
chr2R	-	3898050	3898274
chr2R	-	3898050	3898417
chr2R	-	3954798	3954846
chr2R	-	3954798	3954911
chr2R	+	3963607	3963796
chr2R	+	3963613	3963796
chr2R	+	3963953	3965234
chr2R	+	3964797	3965234
chr2R	+	4020580	4020641
chr2R	+	4020580	4020644
chr2R	-	4024598	4037598
chr2R	-	4024911	4037598
chr2R	-	4025187	4026441
chr2R	-	4026097	4026441
chr2R	-	4028118	4028184
chr2R	-	4028121	4028184
chr2R	-	4028629	4037598
chr2R	-	4029350	4037598
chr2R	-	4030579	4043558
chr2R	-	4030661	4037598
chr2R	-	4030993	4037598
chr2R	-	4032149	4037598
chr2R	-	4032693	4037598
chr2R	-	4032894	4037598
chr2R	-	4033746	4037598
chr2R	-	4033781	4037598
chr2R	-	4035900	4043558
chr2R	+	4056945	4057007
chr2R	+	4056945	4057021
chr2R	+	434559	447864
chr2R	+	434559	450348
chr2R	+	448294	448458
chr2R	+	448294	450348
chr2R	+	449182	450348
chr2R	+	4502754	4502910
chr2R	+	4502768	4502910
chr2R	+	4505966	4506022
chr2R	+	4505966	4506034
chr2R	+	4553816	4554271
chr2R	+	4553816	4562150
chr2R	+	4554299	4562150
chr2R	-	4607289	4607346
chr2R	-	4607289	4607358
chr2R	-	4619316	4619425
chr2R	-	4619316	4619663
chr2R	-	4619468	4619663
chr2R	-	4620385	4620805
chr2R	-	4620385	4621295
chr2R	-	4786817	4786870
chr2R	-	4786820	4786870
chr2R	+	4788936	4789831
chr2R	+	4789027	4789640
chr2R	+	4789027	4789831
chr2R	+	4789291	4789640
chr2R	-	4806968	4807027
chr2R	-	4806971	4807027
chr2R	-	4836446	4837349
chr2R	-	4836446	4838209
chr2R	+	487592	494267
chr2R	+	487592	495862
chr2R	+	494825	495862
chr2R	+	5003956	5004681
chr2R	+	5004356	5004681
chr2R	+	5006552	5007803
chr2R	+	5006552	5007812
chr2R	+	5020272	5021102
chr2R	+	5020852	5021102
chr2R	-	5030741	5030896
chr2R	-	5030741	5031123
chr2R	-	5030900	5031123
chr2R	-	5118153	5118609
chr2R	-	5118153	5119251
chr2R	-	5118685	5119251
chr2R	-	5123080	5126081
chr2R	-	5123080	5134268
chr2R	+	5125542	5125595
chr2R	+	5125542	5125600
chr2R	+	5126923	5126994
chr2R	+	5126923	5126999
chr2R	-	5143214	5143332
chr2R	-	5143214	5146343
chr2R	-	5200250	5204796
chr2R	-	5200250	5238175
chr2R	-	5200250	5257752
chr2R	-	5208679	5238175
chr2R	-	5208715	5238170
chr2R	-	5208715	5238175
chr2R	-	5238350	5238944
chr2R	-	5238678	5238873
chr2R	-	5238678	5238912
chr2R	-	5238678	5238944
chr2R	-	5238678	5238965
chr2R	-	5238678	5238967
chr2R	-	5238678	5238972
chr2R	-	5238678	5239045
chr2R	-	5238698	5238944
chr2R	-	5288653	5289912
chr2R	-	5289739	5289912
chr2R	-	5290271	5291210
chr2R	-	5290340	5291210
chr2R	+	5311771	5311832
chr2R	+	5311771	5311835
chr2R	+	5311930	5312042
chr2R	+	5311965	5312042
chr2R	+	5392973	5395366
chr2R	+	5392973	5396430
chr2R	+	5395758	5396430
chr2R	+	5398704	5410441
chr2R	+	5398704	5414791
chr2R	-	5463889	5465193
chr2R	-	5463889	5465688
chr2R	+	5467292	5467466
chr2R	+	5467341	5467466
chr2R	+	5474733	5474950
chr2R	+	5474843	5474950
chr2R	-	5503008	5530708
chr2R	-	5503008	5545097
chr2R	-	5503008	5554868
chr2R	-	5512281	5545097
chr2R	-	5530617	5530708
chr2R	-	5530981	5545097
chr2R	-	5541556	5545097
chr2R	+	560564	560617
chr2R	+	560567	560617
chr2R	-	5700169	5700227
chr2R	-	5700169	5706500
chr2R	-	5700169	5707343
chr2R	-	5706513	5707343
chr2R	-	5752556	5752627
chr2R	-	5752559	5752627
chr2R	-	5752574	5752627
chr2R	-	5773485	5773703
chr2R	-	5773485	5774434
chr2R	+	5782196	5782250
chr2R	+	5782196	5782253
chr2R	-	5804396	5804960
chr2R	-	5804396	5805441
chr2R	-	5805036	5805441
chr2R	-	5809508	5816403
chr2R	-	5809508	5821822
chr2R	-	5821882	5828248
chr2R	-	5821882	5845627
chr2R	-	5828458	5845627
chr2R	-	5887420	5888328
chr2R	-	5887420	5892660
chr2R	-	5911707	5913332
chr2R	-	5911707	5913353
chr2R	-	5911802	5913353
chr2R	-	5916562	5918588
chr2R	-	5917763	5918588
chr2R	-	5918924	5919083
chr2R	-	5918924	5919092
chr2R	-	5918951	5919092
chr2R	-	5925276	5925683
chr2R	-	5925382	5925683
chr2R	+	5937149	5937204
chr2R	+	5937149	5937256
chr2R	+	5937404	5937463
chr2R	+	5937409	5937463
chr2R	+	5972927	5978046
chr2R	+	5975109	5978046
chr2R	+	5975273	5978046
chr2R	+	5978304	5979260
chr2R	+	5978304	5980647
chr2R	+	5979501	5980647
chr2R	+	5987243	5991759
chr2R	+	5987355	5991759
chr2R	+	5988602	5991759
chr2R	+	5988682	5991759
chr2R	+	5988918	5991759
chr2R	+	5988930	5991759
[truncated: 5,315 more rows]

## Sheet: TH
Chromosome	Strand	Start coordinate	End coordinate
chr2L	+	10007178	10007250
chr2L	+	10007178	10007253
chr2L	+	10009536	10010735
chr2L	+	10010557	10010735
chr2L	-	1012456	1013239
chr2L	-	1012463	1013239
chr2L	-	1012730	1019500
chr2L	-	1012730	1019523
chr2L	-	1014060	1016220
chr2L	-	10178416	10179435
chr2L	-	10178477	10179435
chr2L	-	10178477	10180105
chr2L	-	10178477	10180215
chr2L	-	10179519	10180105
chr2L	-	10217180	10217339
chr2L	-	10217180	10217351
chr2L	-	10225811	10225872
chr2L	-	10225811	10226663
chr2L	-	10225965	10226663
chr2L	+	10232659	10233479
chr2L	+	10232659	10233755
chr2L	+	10233561	10233755
chr2L	-	10256506	10256908
chr2L	-	10256506	10257393
chr2L	-	10256506	10257776
chr2L	-	10257122	10257393
chr2L	-	10257716	10257776
chr2L	+	10264264	10264547
chr2L	+	10264264	10264550
chr2L	+	10264885	10264945
chr2L	+	10264889	10264945
chr2L	-	10276567	10277393
chr2L	-	10276567	10277812
chr2L	-	1034190	1042962
chr2L	-	1034190	1046808
chr2L	+	10399676	10399766
chr2L	+	10399688	10399766
chr2L	+	10399712	10399766
chr2L	+	10408386	10408737
chr2L	+	10408386	10409709
chr2L	+	10408621	10408737
chr2L	+	10427003	10427074
chr2L	+	10427008	10427074
chr2L	+	10481570	10481620
chr2L	+	10481570	10481645
chr2L	+	10482574	10482623
chr2L	+	10482574	10482635
chr2L	-	10513564	10516484
chr2L	-	10513564	10516993
chr2L	-	10516893	10516993
chr2L	+	107838	108586
chr2L	+	108226	108586
chr2L	+	108346	108586
chr2L	-	10842273	10842379
chr2L	-	10842273	10842383
chr2L	-	10848863	10850215
chr2L	-	10848863	10850752
chr2L	-	10966409	10966500
chr2L	-	10966409	10968436
chr2L	+	10978706	10978878
chr2L	+	10978706	10979631
chr2L	+	10978706	10980443
chr2L	+	10978981	10979631
chr2L	+	10978981	10980443
chr2L	+	10979713	10980443
chr2L	+	10994021	10994324
chr2L	+	10994021	10994847
chr2L	+	10994021	10995842
chr2L	+	10994021	10997333
chr2L	+	10994380	10994501
chr2L	+	10994380	10997333
chr2L	-	11076855	11076925
chr2L	-	11076861	11076925
chr2L	-	11076864	11076925
chr2L	-	11077233	11081152
chr2L	-	11077238	11081152
chr2L	+	110877	111003
chr2L	+	110877	111905
chr2L	+	111117	112688
chr2L	-	1115943	1116439
chr2L	-	1115943	1117442
chr2L	-	11166143	11166688
chr2L	-	11166143	11175159
chr2L	-	1116690	1117442
chr2L	-	1117516	1118564
chr2L	-	1117516	1128127
chr2L	-	11199794	11203307
chr2L	-	11199794	11203319
chr2L	+	112019	112688
chr2L	+	11210725	11211766
chr2L	+	11210747	11211766
chr2L	+	11278485	11278573
chr2L	+	11278485	11278753
chr2L	+	11278673	11278753
chr2L	+	1139763	1139827
chr2L	+	1139763	1139830
chr2L	+	114991	155565
chr2L	-	1153731	1154280
chr2L	-	1153731	1158077
chr2L	+	1170363	1170417
chr2L	+	1170363	1170428
chr2L	+	1177191	1177254
chr2L	-	11803898	11806046
chr2L	-	11803898	11809124
chr2L	-	11806157	11808012
chr2L	-	11806157	11809124
chr2L	-	11806157	11809139
chr2L	-	11818849	11830275
chr2L	-	11818849	11832723
chr2L	-	11818849	11833258
chr2L	+	1182104	1182168
chr2L	-	11830831	11833258
chr2L	-	11838773	11896209
chr2L	-	11838773	11911684
chr2L	+	12142833	12145068
chr2L	+	12142873	12145068
chr2L	-	12175770	12176802
chr2L	-	122987	123079
chr2L	-	122994	123079
chr2L	+	12362649	12385560
chr2L	+	12374111	12385560
chr2L	-	12421829	12423321
chr2L	-	12421829	12423332
chr2L	-	12458223	12460587
chr2L	-	12458223	12477113
chr2L	-	12477166	12482559
chr2L	-	12477166	12498523
chr2L	-	12477166	12504077
chr2L	-	12477166	12516482
chr2L	-	12477166	12536273
chr2L	-	12498903	12504077
chr2L	-	12517185	12536273
chr2L	+	12695162	12696265
chr2L	+	12696136	12696265
chr2L	+	12730151	12737957
chr2L	+	12736256	12737957
chr2L	+	13195377	13195579
chr2L	+	13195404	13195579
chr2L	+	13208777	13209434
chr2L	+	13208777	13209470
chr2L	+	13384022	13384655
chr2L	+	13384022	13384982
chr2L	+	13384022	13384985
chr2L	+	13384794	13384982
chr2L	+	13384794	13384985
chr2L	-	13386257	13386486
chr2L	-	13386257	13386528
chr2L	+	13476433	13496589
chr2L	+	13486977	13496589
chr2L	+	13489578	13496589
chr2L	+	13550293	13551140
chr2L	+	13550420	13550983
chr2L	+	13550420	13551140
chr2L	+	13599251	13605478
chr2L	+	13599251	13610168
chr2L	+	13599251	13611343
chr2L	+	13599251	13617593
chr2L	+	13599251	13626016
chr2L	+	13599253	13611343
chr2L	+	13636213	13636382
chr2L	+	13636213	13637286
chr2L	+	14040394	14041319
chr2L	+	14040465	14041319
chr2L	+	14615643	14616050
chr2L	+	14615643	14616301
chr2L	+	15092641	15092897
chr2L	+	15092641	15093417
chr2L	+	15093036	15093417
chr2L	+	15093683	15094132
chr2L	+	15093683	15094677
chr2L	+	15094232	15094677
chr2L	+	15252794	15252851
chr2L	+	15252794	15253232
chr2L	+	155429	155544
chr2L	+	155429	155565
chr2L	+	1555205	1556538
chr2L	+	1555211	1556538
chr2L	-	15649518	15650171
chr2L	-	15649731	15650171
chr2L	+	15765577	15765673
chr2L	+	15765589	15765673
chr2L	-	15940082	15961999
chr2L	-	15940082	15962007
chr2L	+	16001254	16013951
chr2L	+	16002139	16013951
chr2L	+	16080196	16080444
chr2L	+	16080196	16080474
chr2L	+	16168604	16169485
chr2L	+	16168604	16169516
chr2L	+	16168648	16169485
chr2L	+	16179546	16180137
chr2L	+	16179546	16181802
chr2L	+	16180246	16181802
chr2L	+	16185626	16186109
chr2L	+	16185626	16187453
chr2L	+	16185626	16189023
chr2L	+	16186151	16189023
chr2L	+	16187840	16189023
chr2L	-	16247384	16247502
chr2L	-	16247384	16248600
chr2L	-	16247764	16248600
chr2L	-	16250158	16251622
chr2L	-	16250158	16257074
chr2L	+	163001	175359
chr2L	+	163001	183759
chr2L	+	16559944	16597209
chr2L	+	16559944	16652741
chr2L	+	16622841	16652741
chr2L	+	16652912	16657497
chr2L	+	16657429	16657497
chr2L	+	16680276	16690900
chr2L	+	16685941	16690900
chr2L	+	16696762	16697499
chr2L	+	16696769	16697499
chr2L	+	16786814	16787515
chr2L	+	16786814	16788019
chr2L	+	16787580	16788019
chr2L	-	16844801	16846749
chr2L	-	16846648	16846749
chr2L	-	16857993	16858620
chr2L	-	1718491	1718673
chr2L	-	1718491	1718694
chr2L	-	1718491	1718738
chr2L	-	17212	18329
chr2L	-	17212	19878
chr2L	-	17368388	17372563
chr2L	-	17371820	17372563
chr2L	+	17385895	17400394
chr2L	+	17394492	17400394
chr2L	+	17401290	17401514
chr2L	+	17401290	17401517
chr2L	+	17401581	17402373
chr2L	+	17401581	17404059
chr2L	+	17402485	17404059
chr2L	+	17402485	17404728
chr2L	-	17439297	17439526
chr2L	-	17439297	17441799
chr2L	-	17711409	17714304
chr2L	-	17711409	17715721
chr2L	+	18120072	18123347
chr2L	+	18120320	18123347
chr2L	+	18122588	18123347
chr2L	-	18210145	18210555
chr2L	-	18210148	18210555
chr2L	+	1836652	1837017
chr2L	+	1836652	1837189
chr2L	+	1836652	1842897
chr2L	+	18370656	18381696
chr2L	+	1837406	1842897
chr2L	+	18384893	18386155
chr2L	+	18384893	18387285
chr2L	-	18443070	18443151
chr2L	-	18443073	18443151
chr2L	-	18473328	18473386
chr2L	-	18473328	18473394
chr2L	-	18474582	18475152
chr2L	-	18474956	18475152
chr2L	+	1854308	1855362
chr2L	+	1854308	1855371
chr2L	-	18960680	18962883
chr2L	-	18962791	18962883
chr2L	-	19008543	19008722
chr2L	-	19008543	19008947
chr2L	-	19031241	19031291
chr2L	-	19031241	19031294
chr2L	-	19044083	19044143
chr2L	-	19044083	19044152
chr2L	-	19044303	19044368
chr2L	-	19044317	19044368
chr2L	-	19119241	19119317
chr2L	-	19119241	19120108
chr2L	-	19119441	19120108
chr2L	-	19119474	19120108
chr2L	-	19387769	19387860
chr2L	-	19387769	19388038
chr2L	-	19387936	19388038
chr2L	-	19388569	19389426
chr2L	-	19388569	19389925
chr2L	-	19388569	19389934
chr2L	-	19393656	19398333
chr2L	-	19393656	19398345
chr2L	-	19393656	19398349
chr2L	-	19437845	19438007
chr2L	-	19437845	19441157
chr2L	-	19438133	19438800
chr2L	-	19438133	19438885
chr2L	-	19489212	19489294
chr2L	-	19489212	19489298
chr2L	-	19514350	19514929
chr2L	-	19514852	19514929
chr2L	-	19514859	19514929
chr2L	+	19530189	19530888
chr2L	+	19530189	19530912
chr2L	+	19556086	19556160
chr2L	+	19556092	19556160
chr2L	-	19569226	19571570
chr2L	-	19569226	19577184
chr2L	-	19571767	19577184
chr2L	+	19587086	19600856
chr2L	+	19587527	19600856
chr2L	+	19688250	19709152
chr2L	+	19688250	19726038
chr2L	-	19793402	19794581
chr2L	-	19794308	19794581
chr2L	+	19807585	19857668
chr2L	+	19828878	19857668
chr2L	+	19887320	19907760
chr2L	+	19902187	19907760
chr2L	-	19970240	19970323
chr2L	-	19970240	19970518
chr2L	-	19970461	19970518
chr2L	+	199743	199901
chr2L	+	199743	200118
chr2L	+	199983	200118
chr2L	-	20079472	20080004
chr2L	-	20079472	20084576
chr2L	-	20083015	20084576
chr2L	+	2010313	2026766
chr2L	+	2017851	2026766
chr2L	+	2028249	2028301
chr2L	+	2028249	2028319
chr2L	+	20336549	20339057
chr2L	+	20336549	20339243
chr2L	+	20339088	20339243
chr2L	+	20340112	20343597
chr2L	+	20342481	20343597
chr2L	+	20343947	20344653
chr2L	+	20343947	20345171
chr2L	+	20351286	20353269
chr2L	+	20351286	20354560
chr2L	+	20351286	20361205
chr2L	+	20351286	20363927
chr2L	+	20647788	20648196
chr2L	+	20648013	20648187
chr2L	+	20648013	20648196
chr2L	-	20690061	20692145
chr2L	-	20690061	20692151
chr2L	-	20790720	20791165
chr2L	-	20790720	20791228
chr2L	+	20798514	20813154
chr2L	+	20810373	20813154
chr2L	+	20830796	20830859
chr2L	+	20830796	20830885
chr2L	-	20874432	20875636
chr2L	-	20874432	20876585
chr2L	-	20874432	20876910
chr2L	-	20875724	20876585
chr2L	-	20875724	20876910
chr2L	-	20876616	20876910
chr2L	+	21121739	21122249
chr2L	+	21121769	21122249
chr2L	+	21122389	21122911
chr2L	+	21122389	21124133
chr2L	+	21122927	21124133
chr2L	+	21124373	21124438
chr2L	+	21124373	21124441
chr2L	+	21125439	21126157
chr2L	+	21125439	21127848
chr2L	+	21126374	21127848
chr2L	+	21128062	21128738
chr2L	+	21128062	21128777
chr2L	+	21129082	21130003
chr2L	+	21129082	21132032
chr2L	+	21263123	21263646
chr2L	+	21263179	21263646
chr2L	+	21275806	21279882
chr2L	+	21275806	21281130
chr2L	+	21280447	21281130
chr2L	+	21311032	21311191
chr2L	+	21311032	21311751
chr2L	+	21312043	21312096
chr2L	+	21312043	21312123
chr2L	+	21312208	21318125
chr2L	+	21315538	21318125
chr2L	+	21318416	21318483
chr2L	+	21318419	21318483
chr2L	+	21380361	21382017
chr2L	+	21380361	21382040
chr2L	+	21380361	21382063
chr2L	+	21380365	21382017
chr2L	+	21380478	21382017
chr2L	+	21380728	21382017
chr2L	-	2138158	2138344
chr2L	-	2138158	2139628
chr2L	+	21381668	21382017
chr2L	+	21381788	21382017
chr2L	+	21381832	21381897
chr2L	+	21381832	21382017
chr2L	+	21384595	21385276
chr2L	+	21384595	21385282
chr2L	+	21388669	21388730
chr2L	+	21388669	21390155
chr2L	-	2139673	2139726
chr2L	-	2139676	2139726
chr2L	-	21615676	21616180
chr2L	-	21615676	21617278
chr2L	-	21616573	21617278
chr2L	+	21719643	21720121
chr2L	+	21719643	21720357
chr2L	+	21719643	21725066
chr2L	+	21720481	21725066
chr2L	+	21725445	21727004
chr2L	+	21725445	21728026
chr2L	+	21727573	21728026
chr2L	-	2190643	2190705
chr2L	-	2190646	2190705
chr2L	-	2190784	2191848
chr2L	-	2191078	2191848
chr2L	+	22146996	22154796
chr2L	+	22153706	22154796
chr2L	-	2215456	2215513
chr2L	-	2215459	2215513
chr2L	-	22167238	22167301
chr2L	-	22167253	22167301
chr2L	+	22240103	22240152
chr2L	+	22240103	22240168
chr2L	+	22240402	22246376
chr2L	+	22240402	22246645
chr2L	+	22246534	22246645
chr2L	-	22429110	22429267
chr2L	-	22429110	22429351
chr2L	-	22429297	22429351
chr2L	+	22433056	22433101
chr2L	+	22433056	22433108
chr2L	+	22477414	22477472
chr2L	+	22477414	22477475
chr2L	-	22690835	22690904
chr2L	-	22690854	22690904
chr2L	+	22737579	22741700
chr2L	+	22737579	22741944
chr2L	+	22741824	22741944
chr2L	+	22741987	22742036
chr2L	+	22741987	22742054
chr2L	-	228281	229171
chr2L	-	228281	230536
chr2L	+	22832741	22832803
chr2L	+	22832745	22832803
chr2L	-	229382	229928
chr2L	-	229382	230536
chr2L	-	22960833	22960930
chr2L	-	22960876	22960930
chr2L	-	229977	230536
chr2L	-	231034	231946
chr2L	-	231034	231961
chr2L	-	2361585	2364593
chr2L	-	2361585	2364639
chr2L	-	2361585	2364888
chr2L	-	2361585	2365059
chr2L	+	2400350	2401105
chr2L	+	2400965	2401105
chr2L	+	2739024	2739087
chr2L	+	2739024	2739249
chr2L	+	2752837	2753370
chr2L	+	2752840	2753370
chr2L	+	2756143	2756243
chr2L	+	2756164	2756243
chr2L	+	2756170	2756243
chr2L	-	276903	276957
chr2L	-	276903	276972
chr2L	-	2782839	2783039
chr2L	-	2782940	2783039
chr2L	-	2787162	2792193
chr2L	-	2787168	2789345
chr2L	-	2787168	2792193
chr2L	-	2791304	2792193
chr2L	-	2793264	2793326
chr2L	-	2793270	2793326
chr2L	-	2793908	2798484
chr2L	-	2793908	2799907
chr2L	-	2798836	2799907
chr2L	-	284968	285431
chr2L	-	284968	290811
chr2L	-	2853605	2854722
chr2L	-	2853605	2855184
chr2L	-	2853605	2855616
chr2L	-	2882833	2882918
chr2L	-	2882833	2884991
chr2L	-	291031	291605
chr2L	-	291031	291659
chr2L	+	2957051	2960688
chr2L	+	2957264	2960688
chr2L	+	2959520	2960688
chr2L	+	2961996	2962584
chr2L	+	2962286	2962584
chr2L	+	3056924	3059603
chr2L	+	3057110	3059603
chr2L	+	306389	317741
chr2L	-	3081268	3089833
chr2L	-	3081268	3094215
chr2L	+	310605	317741
chr2L	-	33270	33843
chr2L	-	33270	34556
chr2L	-	3361069	3362997
chr2L	-	3361443	3362997
chr2L	-	34288	34556
chr2L	+	344489	344553
chr2L	+	344489	344574
chr2L	+	3723764	3724882
chr2L	+	3723764	3725654
chr2L	+	3725196	3725654
chr2L	+	3759154	3759667
chr2L	+	3759154	3760066
chr2L	+	3759806	3760066
chr2L	+	3803730	3806967
chr2L	+	3806821	3806967
chr2L	-	3876157	3888267
chr2L	-	3883981	3888267
chr2L	-	3911336	3914726
chr2L	-	3911336	3916779
chr2L	-	3915096	3916779
chr2L	-	3989800	3991546
chr2L	-	3989800	3991632
chr2L	-	4190824	4192631
chr2L	-	4190824	4193308
chr2L	-	4192968	4193308
chr2L	+	4299177	4299261
chr2L	+	4299177	4303334
chr2L	+	4299189	4303334
chr2L	+	4304841	4305347
chr2L	+	4304841	4307189
chr2L	+	4305423	4307189
chr2L	+	4318708	4318905
chr2L	+	4318708	4318946
chr2L	-	4455738	4455855
chr2L	-	4455738	4456112
chr2L	-	4456075	4456384
chr2L	-	4456332	4456384
chr2L	-	4457289	4457373
chr2L	-	4457318	4457373
chr2L	-	4458057	4458161
chr2L	-	4458057	4458287
chr2L	+	457562	457613
chr2L	+	457562	457626
chr2L	+	4872693	4873816
chr2L	+	4872693	4873870
chr2L	+	4874169	4874540
chr2L	+	4874169	4874885
chr2L	+	4874562	4874885
chr2L	-	4879196	4880292
chr2L	-	4879196	4880376
chr2L	-	4882492	4882863
chr2L	-	4882492	4882887
chr2L	-	4911641	4911721
chr2L	-	4911671	4911721
chr2L	+	492041	533886
chr2L	+	492041	533889
chr2L	+	492041	533892
chr2L	+	4987240	4987905
chr2L	+	4987318	4987905
chr2L	+	4988848	4989388
chr2L	+	4988848	4990306
chr2L	+	4989410	4990306
chr2L	+	4991262	4991559
chr2L	+	4991436	4991559
chr2L	-	4994994	4997112
chr2L	-	4994994	4999223
chr2L	-	4994994	5004170
chr2L	-	4994994	5004612
chr2L	-	5004207	5004612
chr2L	-	5004207	5008179
chr2L	-	5042887	5042959
chr2L	-	5042890	5042959
chr2L	-	5042890	5042982
chr2L	-	5042890	5043076
chr2L	-	5043016	5043076
chr2L	+	5043383	5044305
chr2L	+	5043383	5044321
chr2L	+	5043383	5044581
chr2L	+	5043383	5045820
chr2L	+	5044689	5045820
chr2L	+	5045483	5045820
chr2L	-	5050017	5050127
chr2L	-	5050017	5050656
chr2L	+	5063210	5066868
chr2L	+	5064581	5066868
chr2L	+	5068394	5069125
chr2L	+	5068394	5070095
chr2L	+	5069219	5070095
chr2L	-	5074529	5075647
chr2L	-	5074529	5077075
chr2L	-	5075829	5077533
chr2L	-	5077257	5077533
chr2L	-	5079574	5092873
chr2L	-	5079574	5093443
chr2L	-	5092898	5093443
chr2L	+	5144785	5146991
chr2L	+	5146703	5146991
chr2L	+	5203742	5204449
chr2L	+	5203742	5204461
chr2L	+	5204592	5204834
chr2L	+	5204592	5204873
chr2L	+	5204592	5205102
chr2L	+	5204903	5205102
chr2L	-	5219107	5228765
chr2L	+	5327286	5327501
chr2L	+	5327350	5327501
chr2L	-	542346	542428
chr2L	-	542350	542428
chr2L	-	5540300	5540423
chr2L	-	5540300	5540970
chr2L	+	5548709	5549015
chr2L	+	5548709	5549442
chr2L	-	5736933	5740659
chr2L	-	5736938	5740659
chr2L	-	5763368	5765959
chr2L	-	5764271	5765959
chr2L	+	5851826	5852882
chr2L	+	5851826	5852991
chr2L	+	5852898	5852991
chr2L	+	5856318	5856381
chr2L	+	5856318	5856402
chr2L	+	5944445	5946042
chr2L	+	5944862	5946042
chr2L	+	5947332	5947855
chr2L	+	5947332	5948405
chr2L	-	5976782	5979410
chr2L	-	5976782	5979697
chr2L	-	5976782	5979938
chr2L	-	5979704	5979817
chr2L	-	5979704	5979938
chr2L	-	5979704	5979950
chr2L	-	5979704	5980949
chr2L	+	5981835	5983008
chr2L	+	5982821	5983008
chr2L	+	5985220	5985337
chr2L	+	5985220	5985341
chr2L	+	5986892	5987614
chr2L	+	5987494	5987614
chr2L	-	6025950	6031291
chr2L	-	6027871	6031291
chr2L	+	6101798	6121772
chr2L	+	6113113	6121772
chr2L	+	6122410	6122696
chr2L	+	6122410	6122976
chr2L	+	6122853	6122976
chr2L	+	6329697	6330121
chr2L	+	6329697	6330769
chr2L	+	6330886	6331042
chr2L	+	6330886	6331045
chr2L	+	6343069	6344157
chr2L	+	6343941	6344157
chr2L	+	6457916	6458085
chr2L	+	6457916	6458169
chr2L	+	6458095	6458151
chr2L	+	6458095	6458169
chr2L	-	6572542	6573697
chr2L	-	6572542	6574014
chr2L	-	6573805	6574014
chr2L	-	6646947	6647745
chr2L	-	6646947	6647919
chr2L	-	6646947	6647949
chr2L	-	6646947	6649028
chr2L	-	6678224	6678910
chr2L	-	6678224	6679984
chr2L	-	6678756	6678910
chr2L	-	6678933	6679984
chr2L	-	6679262	6679984
chr2L	-	6680524	6680669
chr2L	-	6680524	6680945
chr2L	-	6680542	6680669
chr2L	-	6680542	6680945
chr2L	-	6680706	6680945
chr2L	+	6777734	6777794
chr2L	+	6777734	6777797
chr2L	-	6791841	6793226
chr2L	-	6791841	6796335
chr2L	-	7032177	7032309
chr2L	-	7032177	7032320
chr2L	+	7033018	7034197
chr2L	+	7033018	7035073
chr2L	+	7033018	7035405
chr2L	+	7034910	7035073
chr2L	+	7034910	7035405
chr2L	+	7034912	7035073
chr2L	+	7034912	7035405
chr2L	+	7049725	7051365
chr2L	+	7050983	7051365
chr2L	-	7107551	7118883
chr2L	-	7107551	7155485
chr2L	+	7183322	7183776
chr2L	+	7183665	7183776
chr2L	+	7184203	7184384
chr2L	+	7184203	7184613
chr2L	+	7184394	7184613
chr2L	-	7196857	7203933
chr2L	-	7196857	7203937
chr2L	-	7223697	7225604
chr2L	-	7223697	7227102
chr2L	-	7225061	7225604
chr2L	-	7225856	7227102
chr2L	+	72977	74901
chr2L	+	73692	73818
chr2L	+	73692	74901
chr2L	-	738435	738502
chr2L	-	738435	738506
chr2L	+	73897	74901
chr2L	+	74572	74901
chr2L	-	7644774	7644922
chr2L	-	7644786	7644922
chr2L	-	7646010	7648745
chr2L	-	7647266	7648745
chr2L	-	7647509	7648745
chr2L	-	7651743	7655052
chr2L	-	7651743	7655543
chr2L	-	7655221	7655543
chr2L	-	7656463	7657183
chr2L	-	7656463	7661696
chr2L	+	7773658	7774199
chr2L	+	7773658	7774223
chr2L	-	7786424	7786699
chr2L	-	7786424	7786988
chr2L	-	7826336	7826532
chr2L	-	7826336	7826768
chr2L	+	7828153	7830460
chr2L	+	7828668	7830460
chr2L	+	7985433	7985551
chr2L	+	7985441	7985551
chr2L	+	8036298	8036356
chr2L	+	8036298	8036380
chr2L	+	8036576	8036835
chr2L	+	8036576	8037088
chr2L	+	8036893	8037088
chr2L	-	8042613	8042690
chr2L	-	8042613	8042821
chr2L	+	8083457	8089183
chr2L	+	8083521	8089183
chr2L	+	8083587	8089183
chr2L	+	8083636	8089183
chr2L	+	8083636	8089392
chr2L	+	8084058	8089183
chr2L	+	8088453	8089183
chr2L	+	8088453	8089392
chr2L	+	8088516	8089183
chr2L	+	8089736	8102298
chr2L	+	8089736	8105690
chr2L	+	8103503	8105690
chr2L	+	8107880	8109814
chr2L	+	8107880	8110479
chr2L	-	8140778	8156519
chr2L	-	8140778	8159217
chr2L	+	8145973	8152585
chr2L	+	8149473	8152585
chr2L	-	8193707	8195019
chr2L	-	8194059	8195019
chr2L	+	8213260	8213335
chr2L	+	8213282	8213335
chr2L	-	8218679	8218852
chr2L	-	8218679	8219114
chr2L	-	8218871	8219114
chr2L	+	824137	824189
chr2L	+	824137	824217
chr2L	-	8246217	8246417
chr2L	-	8246217	8246859
chr2L	+	826507	826647
chr2L	+	826507	829455
chr2L	+	8304577	8304660
chr2L	+	8304577	8304842
chr2L	+	8304772	8304842
chr2L	+	8369030	8369714
chr2L	+	8369030	8369797
chr2L	+	8384895	8386215
chr2L	+	8385097	8386215
chr2L	+	8386385	8386473
chr2L	+	8386385	8386482
chr2L	+	8386385	8386485
chr2L	+	8428067	8428318
chr2L	+	8428067	8430279
chr2L	+	8429462	8430279
chr2L	-	8493092	8493742
chr2L	-	8493092	8493745
chr2L	+	8542212	8544542
chr2L	+	8543674	8544542
chr2L	+	8543715	8544542
chr2L	+	8545233	8555045
chr2L	+	8545233	8563737
chr2L	+	8564296	8579084
chr2L	+	8564296	8631025
chr2L	+	8663251	8664156
chr2L	+	8663251	8665444
chr2L	+	8663251	8666034
chr2L	+	8664220	8664373
chr2L	+	8664220	8665444
chr2L	+	8664220	8666034
chr2L	+	8664430	8665444
chr2L	+	8665518	8666034
chr2L	-	8690252	8692151
chr2L	-	8690252	8698847
chr2L	+	870552	871339
chr2L	+	871274	871339
chr2L	-	8713370	8734465
chr2L	-	8713370	8740383
chr2L	-	8735200	8740383
chr2L	-	8945534	8946461
chr2L	-	8945534	8950976
chr2L	+	9127466	9154657
chr2L	+	9135384	9154657
chr2L	+	9162708	9163139
chr2L	+	9162708	9163293
chr2L	+	9176461	9177120
chr2L	+	9176657	9177123
chr2L	+	9176661	9177120
chr2L	+	9176661	9177123
chr2L	+	9176766	9177123
chr2L	+	9256651	9272464
chr2L	+	9256696	9256891
chr2L	+	9256696	9272464
chr2L	+	9257206	9272464
chr2L	+	9259421	9272464
chr2L	+	9519479	9519718
chr2L	+	9519534	9519718
chr2L	-	9556398	9566431
chr2L	-	9556398	9566539
chr2L	+	956792	956858
chr2L	+	956792	956863
chr2L	-	9685202	9685593
chr2L	-	9685202	9696189
chr2L	-	9703605	9704064
chr2L	-	9703605	9705778
chr2L	-	9714153	9724075
chr2L	-	9714153	9743476
chr2L	-	9718520	9720089
chr2L	-	9718520	9722759
chr2L	-	9720165	9722759
chr2L	-	9722942	9727026
chr2L	-	9722954	9727026
chr2L	-	9722954	9727134
chr2L	-	9727256	9732914
chr2L	-	9727256	9732953
chr2L	-	9744226	9746432
chr2L	-	9744230	9746432
chr2L	-	9797849	9797910
chr2L	-	9797852	9797910
chr2L	-	9798305	9802349
chr2L	-	9798305	9806442
chr2L	-	9798305	9807308
chr2L	-	9802437	9807308
chr2L	-	9806530	9807308
chr2L	-	9815912	9819285
chr2L	-	9815912	9825295
chr2L	-	9819331	9825611
chr2L	-	9825341	9825611
chr2L	-	9825752	9869530
chr2L	-	9854878	9869530
chr2L	-	9877260	9885724
chr2L	-	9877260	9885930
chr2L	-	9877278	9885930
chr2L	-	9877285	9885930
chr2L	-	9877972	9885724
chr2L	-	9877972	9885930
chr2L	-	9878025	9885724
chr2L	-	9878025	9885930
chr2L	-	9905083	9905873
chr2L	-	9905291	9905873
chr2L	-	9907783	9908423
chr2L	-	9907847	9908423
chr2LHet	+	167315	167374
chr2LHet	+	167315	167382
chr2LHet	-	168745	168842
chr2LHet	-	168795	168842
chr2LHet	-	21373	21434
chr2LHet	-	21383	21434
chr2LHet	-	21569	32571
chr2LHet	-	25390	32571
chr2R	+	10058227	10059793
chr2R	+	10058956	10059793
chr2R	+	10059731	10059793
chr2R	+	10065705	10065775
chr2R	+	10065708	10065775
chr2R	+	10066546	10066612
chr2R	+	10066546	10066615
chr2R	-	1009157	1009486
chr2R	-	1009157	1015729
chr2R	-	10103615	10103937
chr2R	-	10103615	10104033
chr2R	-	10119469	10120219
chr2R	-	10119469	10120228
chr2R	-	10121847	10121899
chr2R	-	10121847	10121946
chr2R	-	10121847	10122196
chr2R	-	10122064	10122196
chr2R	+	10163911	10164784
chr2R	+	10163933	10164784
chr2R	+	10164031	10164784
chr2R	+	10164031	10166746
chr2R	+	10164560	10164784
chr2R	+	10167147	10168898
chr2R	+	10167147	10173205
chr2R	+	10169061	10173205
chr2R	+	10179687	10179732
chr2R	+	10179687	10179747
chr2R	+	10179886	10181596
chr2R	+	10179886	10184204
chr2R	+	10181693	10184204
chr2R	+	10185193	10185250
chr2R	+	10185193	10185303
chr2R	+	1035939	1035993
chr2R	+	1035939	1035996
chr2R	-	10491628	10491700
chr2R	-	10491633	10491700
chr2R	-	10641395	10641454
chr2R	-	10641395	10641490
chr2R	-	10650513	10651334
chr2R	-	10650579	10651334
chr2R	+	10658334	10659303
chr2R	+	10659147	10659303
chr2R	-	10661512	10661683
chr2R	-	10661512	10662472
chr2R	-	10818124	10818190
chr2R	-	10818132	10818190
chr2R	-	10820735	10822304
chr2R	-	10821094	10822304
chr2R	-	10834108	10834207
chr2R	-	10834108	10834682
chr2R	-	10834324	10835145
chr2R	-	10834805	10835145
chr2R	-	10840073	10840590
chr2R	-	10840094	10840590
chr2R	+	10851430	10859233
chr2R	+	10853504	10859233
chr2R	+	10927555	10927620
chr2R	+	10927555	10927641
chr2R	+	11027600	11027881
chr2R	+	11027600	11027974
chr2R	+	11028182	11028477
chr2R	+	11028182	11028486
chr2R	+	11043720	11051389
chr2R	+	11043720	11068016
chr2R	+	11052605	11068016
chr2R	+	11109070	11109131
chr2R	+	11109070	11109231
chr2R	+	11109328	11109402
chr2R	+	11109328	11109547
chr2R	-	11152481	11152726
chr2R	-	11152481	11153134
chr2R	-	11152865	11153134
chr2R	-	11155889	11157801
chr2R	-	11157262	11157801
chr2R	-	11159044	11160055
chr2R	-	11159044	11161723
chr2R	-	11172471	11174857
chr2R	-	11172471	11180276
chr2R	+	11199472	11199536
chr2R	+	11199472	11199539
chr2R	+	11210217	11210627
chr2R	+	11210217	11210952
chr2R	+	11210246	11210952
chr2R	+	11210646	11210952
chr2R	+	11311910	11340360
chr2R	+	11313171	11340360
chr2R	+	11314132	11340360
chr2R	+	11340513	11341244
chr2R	+	11340513	11343938
chr2R	+	11341302	11343938
chr2R	+	11344320	11345251
chr2R	+	11344320	11346402
chr2R	+	11344320	11348376
chr2R	+	11346772	11351974
chr2R	+	11346772	11352861
chr2R	+	11352191	11352861
chr2R	+	11352996	11353153
chr2R	+	11353011	11353153
chr2R	-	11407984	11408583
chr2R	-	11407984	11409345
chr2R	-	11408605	11409345
chr2R	-	11455218	11455332
chr2R	-	11455218	11455655
chr2R	-	11455345	11455655
chr2R	-	11546353	11546746
chr2R	-	11546353	11550427
chr2R	-	11824085	11824524
chr2R	-	11824085	11825618
chr2R	-	11824085	11825950
chr2R	-	11824088	11824524
chr2R	-	11824088	11825618
chr2R	-	11824088	11825950
chr2R	-	11825384	11825950
chr2R	+	1182562	1182619
chr2R	+	1182568	1182619
chr2R	-	11825772	11825950
chr2R	-	11914768	11914840
chr2R	-	11914783	11914840
chr2R	+	11919681	11925555
chr2R	+	11919939	11925555
chr2R	+	11986520	11986582
chr2R	+	11986524	11986582
chr2R	+	12020140	12020332
chr2R	+	12020140	12020925
chr2R	+	12020595	12023530
chr2R	+	12021188	12023530
chr2R	+	12084077	12084195
chr2R	+	12084107	12084195
chr2R	-	12093584	12097693
chr2R	-	12093584	12108626
chr2R	-	12213569	12213638
chr2R	-	12213569	12213836
chr2R	-	12213778	12213836
chr2R	-	12214665	12216056
chr2R	-	12214665	12220537
chr2R	-	12216155	12216920
chr2R	-	12216419	12216920
chr2R	-	12217903	12220537
chr2R	-	12220925	12221283
chr2R	-	12220925	12223993
chr2R	+	12224368	12226950
chr2R	+	12225926	12226950
chr2R	+	12225941	12226950
chr2R	+	12316327	12316834
chr2R	+	12316327	12317082
chr2R	+	12316967	12317082
chr2R	+	12495839	12506307
chr2R	+	12496830	12499837
chr2R	+	12496830	12506307
chr2R	+	12497800	12506307
chr2R	+	12499487	12506307
chr2R	+	12500078	12506307
chr2R	+	12505581	12506307
chr2R	+	12505648	12506307
chr2R	+	12505695	12506307
chr2R	+	12505961	12506307
chr2R	+	12529197	12529555
chr2R	+	12529197	12530446
chr2R	+	12529701	12530446
chr2R	+	12531161	12531559
chr2R	+	12531161	12532249
chr2R	+	12531161	12538316
chr2R	+	12531599	12532249
chr2R	+	12532962	12533160
chr2R	+	12532962	12533164
chr2R	+	12534610	12538316
chr2R	-	12544944	12546250
chr2R	-	12544944	12551018
chr2R	-	12641657	12641746
chr2R	-	12641657	12643390
chr2R	-	12641774	12643390
chr2R	-	12643955	12644059
chr2R	-	12643955	12644068
chr2R	-	12645907	12646755
chr2R	-	12646334	12646755
chr2R	-	12648219	12648909
chr2R	-	12648219	12649171
chr2R	-	12648952	12649171
chr2R	-	12650845	12651641
chr2R	-	12650845	12659761
chr2R	-	12651879	12652831
chr2R	-	12651879	12653336
chr2R	-	126661	129592
chr2R	-	126661	130264
chr2R	+	12677420	12677659
chr2R	+	12677420	12678242
chr2R	+	12677771	12678242
chr2R	-	12752538	12752595
chr2R	-	12752541	12752595
chr2R	+	12812291	12813849
chr2R	+	12812295	12813849
chr2R	+	12812482	12813849
chr2R	+	12812542	12813849
chr2R	+	12813250	12813849
chr2R	+	12861629	12867350
chr2R	+	12861629	12871769
chr2R	+	12866270	12871769
chr2R	+	12867400	12871769
chr2R	+	12874255	12879154
chr2R	+	12874255	12881663
chr2R	+	12879167	12881663
chr2R	-	12898040	12898390
chr2R	-	12898040	12898657
chr2R	-	12898481	12898657
chr2R	-	12900213	12900788
chr2R	-	12900279	12900788
chr2R	-	12902707	12903162
chr2R	-	12902707	12903166
chr2R	-	12906826	12906936
chr2R	-	12906854	12906936
chr2R	+	12938669	12939325
chr2R	+	12938669	12940772
chr2R	+	12940649	12940772
chr2R	-	130204	130264
chr2R	+	13104580	13107558
chr2R	+	13104580	13162913
chr2R	+	13107608	13162913
chr2R	+	13143500	13162913
chr2R	+	13153716	13162913
chr2R	+	13239810	13241682
chr2R	+	13239810	13248616
chr2R	+	13239810	13249483
chr2R	+	13248659	13249483
chr2R	+	13249602	13260580
chr2R	+	13249602	13261321
chr2R	+	13260666	13261321
chr2R	-	13408433	13409209
chr2R	-	13408433	13409335
chr2R	-	13408433	13410356
chr2R	-	13409405	13410356
chr2R	-	13409405	13411003
chr2R	-	13410465	13411003
chr2R	+	13450043	13450163
chr2R	+	13450043	13450461
chr2R	+	13557137	13557190
chr2R	+	13557137	13557646
chr2R	+	13586949	13587361
chr2R	+	13586954	13587361
chr2R	+	13588697	13588872
chr2R	+	13588701	13588872
chr2R	+	13685366	13685428
chr2R	+	13685366	13685431
chr2R	+	13727294	13727938
chr2R	+	13727294	13728251
chr2R	+	13728004	13728251
chr2R	+	13738965	13742643
chr2R	+	13738965	13745145
chr2R	-	13755064	13755286
chr2R	-	13755064	13755790
chr2R	-	13755593	13755790
chr2R	-	14007905	14007970
chr2R	-	14007908	14007970
chr2R	-	14018550	14018639
chr2R	-	14018550	14018785
chr2R	-	14018694	14018785
chr2R	+	14028459	14028991
chr2R	+	14028921	14028991
chr2R	+	14032779	14032845
chr2R	+	14032783	14032845
chr2R	-	14043670	14045188
chr2R	-	14043670	14045445
chr2R	-	14043670	14045476
chr2R	-	14177355	14243003
chr2R	-	14193640	14243003
chr2R	-	14243560	14244595
chr2R	-	14243560	14244641
chr2R	+	14271585	14271653
chr2R	+	14274214	14274296
chr2R	+	14274235	14274296
chr2R	+	14309058	14311372
chr2R	+	14309058	14311630
chr2R	+	14311376	14311472
chr2R	+	14311376	14311630
chr2R	+	14311512	14311630
chr2R	+	14311991	14312110
chr2R	+	14311991	14312375
chr2R	+	14312171	14312375
chr2R	+	14312539	14312843
chr2R	+	14312581	14312843
chr2R	-	14325117	14325443
chr2R	-	14325117	14325711
chr2R	-	14325482	14325711
chr2R	-	14345103	14345398
chr2R	-	14345103	14348069
chr2R	-	14345659	14348069
chr2R	-	14345975	14348069
chr2R	+	14410546	14410697
chr2R	+	14410546	14410703
chr2R	-	14520488	14520557
chr2R	-	14520491	14520557
chr2R	-	14520629	14520695
chr2R	-	14520632	14520695
chr2R	-	14530267	14540027
chr2R	-	14530267	14545583
chr2R	+	14576016	14579544
chr2R	+	14576246	14579544
chr2R	-	14616251	14616346
chr2R	-	14616291	14616346
chr2R	+	14708788	14708993
chr2R	+	14708788	14708996
chr2R	+	14708788	14709479
chr2R	+	14720186	14720293
chr2R	+	14720186	14720296
chr2R	-	14859268	14859332
chr2R	-	14859280	14859332
chr2R	-	1491517	1491573
chr2R	-	1491517	1491747
chr2R	-	1491675	1491747
chr2R	-	1492021	1492086
chr2R	-	1492021	1492213
chr2R	-	1492155	1492213
chr2R	+	15025766	15026644
chr2R	+	15025766	15027197
chr2R	+	15026854	15027197
chr2R	+	15048920	15048976
chr2R	+	15048920	15048979
chr2R	+	15060393	15060935
chr2R	+	15060426	15060935
chr2R	+	15061626	15061842
chr2R	+	15061626	15062080
chr2R	+	15061870	15062080
chr2R	+	15062591	15063691
chr2R	+	15062753	15063691
chr2R	+	15062753	15063751
chr2R	+	15062753	15063769
chr2R	+	15062813	15063691
chr2R	+	15062813	15063751
chr2R	+	15062813	15063769
chr2R	+	15064248	15064444
chr2R	+	15064248	15065322
chr2R	+	15064458	15064806
chr2R	+	15064458	15065322
chr2R	+	15065078	15065322
chr2R	+	15066377	15066914
chr2R	+	15066377	15067002
chr2R	+	15105699	15108247
chr2R	+	15105699	15110743
chr2R	+	15108287	15110743
chr2R	+	15124568	15124831
chr2R	+	15124568	15125655
chr2R	+	15124946	15125655
chr2R	+	15125939	15128719
chr2R	+	15125939	15129677
chr2R	+	15125939	15130207
chr2R	+	15129290	15129677
chr2R	+	15129290	15130207
chr2R	+	15129900	15129987
chr2R	+	15129900	15130207
chr2R	+	15130090	15130207
chr2R	-	15202843	15203954
chr2R	-	15202843	15205045
chr2R	-	15286598	15293523
chr2R	-	15286598	15294118
chr2R	-	15286598	15295344
chr2R	-	15293593	15295344
chr2R	-	15306110	15311097
chr2R	-	15306110	15312326
chr2R	-	15311302	15312326
chr2R	+	15316049	15316740
chr2R	+	15316138	15316740
chr2R	+	15330603	15330663
chr2R	+	15330603	15330816
chr2R	+	15330744	15330816
chr2R	+	15359241	15360322
chr2R	+	15359250	15360322
chr2R	+	15360669	15360943
chr2R	+	15360684	15360943
chr2R	+	15361472	15362031
chr2R	+	15361472	15365137
chr2R	+	15361472	15366255
chr2R	+	15362146	15366255
chr2R	+	15366370	15368654
chr2R	+	15366370	15370455
chr2R	-	15418205	15419673
chr2R	-	15418205	15419679
chr2R	-	15425716	15433515
chr2R	-	15425716	15451944
chr2R	-	15425716	15451965
chr2R	-	15425716	15461491
chr2R	-	15425716	15461506
chr2R	-	15433564	15451944
chr2R	-	15433564	15451965
chr2R	-	15452017	15453652
chr2R	-	15452017	15461491
chr2R	-	15452017	15461506
chr2R	-	15454665	15461506
chr2R	-	15461831	15488385
chr2R	-	15476248	15488385
chr2R	-	15516575	15517706
chr2R	-	15516575	15517987
chr2R	-	15516575	15518356
chr2R	-	15516575	15518540
chr2R	+	1556013	1556179
chr2R	+	1556013	1556296
chr2R	-	16143314	16143389
chr2R	-	16143314	16143586
chr2R	-	16143540	16143939
chr2R	-	16143740	16143939
chr2R	-	16194141	16195650
chr2R	-	16194141	16196064
chr2R	+	16211916	16212001
chr2R	+	16211916	16212351
chr2R	+	16214898	16215370
chr2R	+	16214898	16215830
chr2R	+	16215639	16215830
chr2R	+	16357625	16357917
chr2R	+	16357625	16359044
chr2R	+	16359480	16359577
chr2R	+	16359489	16359577
chr2R	+	16475249	16477120
chr2R	+	16475249	16483060
chr2R	+	16477172	16483060
chr2R	+	16483319	16485051
chr2R	+	16483319	16485956
chr2R	+	16485096	16485956
chr2R	+	16486199	16492199
chr2R	+	16490653	16492199
chr2R	+	16493356	16493947
chr2R	+	16493381	16493947
chr2R	+	16528623	16528669
chr2R	+	16528623	16528672
chr2R	+	16528623	16528684
chr2R	+	16599274	16631681
chr2R	+	16600914	16631681
chr2R	+	16621444	16631681
chr2R	+	16621444	16637187
chr2R	-	16756607	16756685
chr2R	-	16756627	16756685
chr2R	+	16907087	16907590
chr2R	+	16907364	16907590
chr2R	+	16908822	16909004
chr2R	+	16908822	16909389
chr2R	+	16908822	16910568
chr2R	+	16909026	16909389
chr2R	+	16909026	16910568
chr2R	+	16909638	16910568
chr2R	+	16909638	16910937
chr2R	+	16910670	16910937
chr2R	+	16911091	16911165
chr2R	+	16911091	16911479
chr2R	+	16911259	16911479
chr2R	+	16964644	16972701
chr2R	+	16972203	16972701
chr2R	+	16974442	16975284
chr2R	+	16974917	16975284
chr2R	+	16975358	16975841
chr2R	+	16975593	16975841
chr2R	-	17041671	17042047
chr2R	-	17041671	17042218
chr2R	-	17044802	17045718
chr2R	-	17044802	17047932
chr2R	+	17067101	17067441
chr2R	+	17067149	17067441
chr2R	+	17093319	17094380
chr2R	+	17093319	17095973
chr2R	+	17166330	17166486
chr2R	+	17166330	17167302
chr2R	+	17166598	17167302
chr2R	+	17181294	17181353
chr2R	+	17181294	17181557
chr2R	+	17181379	17181557
chr2R	+	17195663	17195795
chr2R	+	17195663	17195955
chr2R	+	17195826	17195955
chr2R	-	17282550	17285568
chr2R	-	17282550	17286390
chr2R	-	17282550	17286678
chr2R	-	17299923	17304383
chr2R	-	17299923	17367594
chr2R	-	17348864	17367594
chr2R	-	17367861	17368517
chr2R	-	17367883	17368517
chr2R	-	17382831	17384567
chr2R	-	17382831	17385284
chr2R	+	17389984	17394798
chr2R	+	17389984	17394825
chr2R	+	17389984	17397609
chr2R	+	17389984	17397621
chr2R	+	17389984	17398370
chr2R	+	17397706	17398370
chr2R	+	17399682	17401020
chr2R	+	17399682	17401712
chr2R	+	17399682	17403391
chr2R	+	1741291	1743018
chr2R	+	1741306	1743018
chr2R	-	17458329	17458613
chr2R	-	17458329	17458920
chr2R	-	17493698	17493971
chr2R	-	17493865	17493971
chr2R	+	17540068	17540416
chr2R	+	17540068	17542278
chr2R	+	17541568	17542278
chr2R	+	17545614	17545849
chr2R	+	17545614	17545854
chr2R	+	17545685	17545849
chr2R	+	17545780	17545849
chr2R	+	17545780	17545854
chr2R	-	17586105	17590176
chr2R	-	17586105	17590180
chr2R	-	17586105	17591826
chr2R	+	1796218	1797304
chr2R	-	17996285	17996354
chr2R	-	17996285	17997090
chr2R	-	18222469	18223184
chr2R	-	18222469	18226304
chr2R	-	18223297	18226304
chr2R	-	18225417	18226304
chr2R	-	18234214	18241891
chr2R	-	18234214	18247757
chr2R	-	18387241	18400314
chr2R	-	18387241	18422348
chr2R	+	18548366	18548462
chr2R	+	18548366	18548572
chr2R	+	18761159	18761349
chr2R	+	18761169	18761349
chr2R	+	18764370	18764423
chr2R	+	18764370	18764435
chr2R	+	18767493	18767999
chr2R	+	18767565	18767654
chr2R	+	18767565	18767999
chr2R	+	18767741	18767999
chr2R	-	18772184	18772241
chr2R	-	18772187	18772241
chr2R	+	18774771	18774828
chr2R	+	18774771	18774831
chr2R	+	18815152	18816609
chr2R	+	18815152	18817320
chr2R	+	18817842	18819036
chr2R	+	18818803	18819036
chr2R	-	18884035	18885954
chr2R	-	18884035	18886224
chr2R	+	18955361	18955468
chr2R	+	18955364	18955468
chr2R	+	1897006	1897301
chr2R	+	1897006	1897882
chr2R	+	1897329	1897882
chr2R	+	1898273	1898435
chr2R	+	1898273	1898444
chr2R	-	1925951	1926011
chr2R	-	1925951	1927585
chr2R	-	19270645	19270841
chr2R	-	19270645	19270886
chr2R	-	19281003	19282438
chr2R	-	19281003	19283950
chr2R	-	19300656	19301054
chr2R	-	19300656	19302018
chr2R	-	19301316	19302018
chr2R	-	19301893	19302018
chr2R	+	19595997	19596151
chr2R	+	19595997	19596156
chr2R	+	19596010	19596151
chr2R	+	19596010	19596156
chr2R	+	19601597	19602187
chr2R	+	19601641	19602187
chr2R	-	1968539	1969239
chr2R	-	1968920	1969239
chr2R	-	19699247	19699316
chr2R	-	19699260	19699316
chr2R	-	1971512	1971672
chr2R	-	1971512	1972011
chr2R	-	1971895	1972011
chr2R	-	1972524	1972589
chr2R	-	1972536	1972589
chr2R	+	19732854	19733056
chr2R	-	19748980	19749782
chr2R	-	19748980	19750011
chr2R	-	19748983	19749782
chr2R	-	19748983	19750011
chr2R	+	19767877	19767952
chr2R	+	19767877	19768000
chr2R	+	19797332	19799198
chr2R	+	19797356	19799198
chr2R	+	19798346	19798912
chr2R	+	19798363	19798912
chr2R	+	19799074	19799198
chr2R	+	19810101	19810162
chr2R	+	19810104	19810162
chr2R	+	19810552	19810861
chr2R	+	19810552	19811523
chr2R	+	19810552	19811937
chr2R	+	19810916	19811523
chr2R	+	19811617	19811937
chr2R	-	19814704	19816835
chr2R	-	19815265	19816835
chr2R	-	19820337	19820780
chr2R	-	19820337	19823101
chr2R	-	1982576	2010385
chr2R	-	1982576	2039333
chr2R	-	19834863	19835005
chr2R	-	19834863	19835137
chr2R	-	19834863	19836010
chr2R	-	19835164	19835873
chr2R	-	19835175	19835873
chr2R	-	19835718	19835873
chr2R	-	19835920	19836010
chr2R	-	19835920	19836013
chr2R	-	19907844	19907905
chr2R	-	19907865	19907905
chr2R	+	19914139	19914297
chr2R	+	19914139	19914525
chr2R	+	19921943	19922209
chr2R	+	19921955	19922209
chr2R	-	19953836	19954082
chr2R	-	19953836	19954684
chr2R	-	19954239	19954684
chr2R	+	19957765	19958289
chr2R	+	19957765	19959512
chr2R	+	19957765	19959516
chr2R	+	19958527	19960226
chr2R	+	19959747	19960226
chr2R	+	20007129	20008233
chr2R	+	20007777	20008233
chr2R	+	20027384	20043325
chr2R	+	20042565	20043325
chr2R	-	20046608	20046666
chr2R	-	20046608	20046670
chr2R	-	20272571	20277115
chr2R	-	20272571	20277119
chr2R	-	20286706	20287367
chr2R	-	20286706	20287721
chr2R	-	20287414	20287721
chr2R	-	2040055	2043661
chr2R	-	2040055	2056259
chr2R	+	20419159	20419961
chr2R	+	20419257	20419961
chr2R	+	20419901	20419961
chr2R	+	20443094	20443805
chr2R	+	20443094	20445551
chr2R	+	20445222	20445551
chr2R	-	20447743	20447813
chr2R	-	20447748	20447813
chr2R	+	20461193	20461273
chr2R	+	20461193	20461337
chr2R	+	20461280	20461337
chr2R	+	20468887	20469362
chr2R	+	20468891	20469362
chr2R	+	20468954	20469362
chr2R	+	20479822	20479886
chr2R	+	20479822	20483379
chr2R	-	20498805	20501435
chr2R	-	20498805	20502250
chr2R	-	20503722	20508223
chr2R	-	20508590	20508869
chr2R	-	20559829	20560072
chr2R	-	20559829	20562584
chr2R	-	20560374	20562584
chr2R	-	20673206	20673257
chr2R	-	20673206	20673263
chr2R	-	20676373	20676500
chr2R	-	20676373	20676657
chr2R	-	20763182	20763286
chr2R	+	20779215	20779923
chr2R	+	20779243	20779923
chr2R	+	20779360	20779805
chr2R	+	20779360	20779923
chr2R	+	20779401	20779805
chr2R	-	20791112	20791219
chr2R	+	20794796	20795656
chr2R	+	20794796	20796000
chr2R	+	20795672	20796000
chr2R	+	20802985	20803252
chr2R	+	20802985	20804293
chr2R	+	20803354	20804841
chr2R	+	20804413	20804841
chr2R	-	20817493	20821579
chr2R	-	20818684	20821579
chr2R	+	20826365	20826477
chr2R	+	20826365	20826495
chr2R	+	20826740	20826792
chr2R	+	20826740	20826795
chr2R	-	20828964	20829771
chr2R	-	20831288	20831344
chr2R	-	20867184	20868521
chr2R	-	20867184	20870544
chr2R	-	20867184	20870548
chr2R	-	20867184	20870550
chr2R	-	20878795	20879086
chr2R	-	20878795	20879331
chr2R	-	20879221	20879331
chr2R	+	20925053	20925223
chr2R	+	20925053	20926572
chr2R	+	20925487	20926572
chr2R	+	20925493	20926572
chr2R	+	20925506	20926572
chr2R	-	20960726	20960799
chr2R	-	20960737	20960799
chr2R	-	2098330	2099099
chr2R	-	2098360	2099099
chr2R	+	2391193	2501608
chr2R	+	2498403	2501608
chr2R	-	2519645	2519809
chr2R	-	2519645	2519827
chr2R	-	2519645	2520498
chr2R	+	2549941	2550072
chr2R	+	2549953	2550072
chr2R	+	2556729	2556833
chr2R	+	2556737	2556833
chr2R	+	2563417	2579201
chr2R	+	2568235	2579201
chr2R	-	2583336	2583395
chr2R	-	2583348	2583395
chr2R	+	2640493	2640730
chr2R	+	2640493	2641683
chr2R	+	2641008	2642205
chr2R	+	2641008	2642208
chr2R	+	2641943	2642205
chr2R	+	2641943	2642208
chr2R	-	2661291	2675965
chr2R	-	2661291	2679819
chr2R	-	266660	295484
chr2R	-	2764031	2764099
chr2R	-	2764031	2764724
chr2R	-	2764238	2764724
chr2R	-	2764627	2764724
chr2R	-	280188	295484
chr2R	-	2814326	2814893
chr2R	-	2814326	2816012
chr2R	-	2816341	2817752
chr2R	-	2817603	2817752
chr2R	-	2821685	2821852
chr2R	-	2821685	2822309
chr2R	-	2821868	2822309
chr2R	-	2822613	2822718
chr2R	-	2822613	2822926
chr2R	-	2866102	2872915
chr2R	-	2870254	2872915
chr2R	+	2875770	2876074
chr2R	+	2875770	2876086
chr2R	+	2929211	2929288
chr2R	+	2929235	2929288
chr2R	-	3208269	3208870
chr2R	-	3208269	3209086
chr2R	-	3208269	3209886
chr2R	-	3209154	3209886
chr2R	-	3209154	3210063
chr2R	-	3209902	3210063
chr2R	-	3213869	3216792
chr2R	-	3214289	3216792
chr2R	-	3344352	3346112
chr2R	-	3345551	3346112
chr2R	-	3354555	3354986
chr2R	-	3354821	3354977
chr2R	-	3354821	3354986
chr2R	-	3355331	3355925
chr2R	-	3355331	3356613
chr2R	-	3356042	3356863
chr2R	-	3356730	3356863
chr2R	-	3361348	3361419
chr2R	-	3361348	3362845
chr2R	-	3362882	3362943
chr2R	-	3362885	3362943
chr2R	-	3565239	3565501
chr2R	-	3565239	3566073
chr2R	-	3565909	3566073
chr2R	-	3607501	3609537
chr2R	-	3607501	3613192
chr2R	-	3617213	3622510
chr2R	-	3617213	3622584
chr2R	-	3617213	3622880
chr2R	-	3629425	3632383
chr2R	-	3629425	3645538
chr2R	-	3692443	3692925
chr2R	-	3692443	3693729
chr2R	-	3817894	3817950
chr2R	-	3817894	3817955
chr2R	-	3898050	3898274
chr2R	-	3898050	3898417
chr2R	-	3954798	3954846
chr2R	-	3954798	3954911
chr2R	+	3963607	3963796
chr2R	+	3963613	3963796
chr2R	+	3963953	3964763
chr2R	+	3963953	3965234
chr2R	+	3964797	3965234
chr2R	-	4024598	4037598
chr2R	-	4025187	4026441
chr2R	-	4026097	4026441
chr2R	-	4027654	4027746
chr2R	-	4027654	4028017
chr2R	-	4027876	4028017
chr2R	-	4028118	4028184
chr2R	-	4028121	4028184
chr2R	-	4030661	4037598
chr2R	-	4030993	4037598
chr2R	-	4032693	4037598
chr2R	-	4033781	4037598
chr2R	+	4281242	4282066
chr2R	+	4281242	4282069
chr2R	+	4281242	4282534
chr2R	+	4282124	4282534
chr2R	+	4282619	4282714
chr2R	+	4282625	4282714
chr2R	+	4282864	4282938
chr2R	+	4282871	4282938
chr2R	+	4502754	4502910
chr2R	+	4502768	4502910
chr2R	+	4505966	4506022
chr2R	+	4505966	4506034
chr2R	+	4554299	4562150
chr2R	+	4559911	4562150
chr2R	-	4607289	4607346
chr2R	-	4607289	4607358
chr2R	-	4619316	4619425
chr2R	-	4619316	4619663
chr2R	-	4619468	4619663
chr2R	-	4786817	4786870
chr2R	-	4786820	4786870
chr2R	+	4789027	4789640
chr2R	+	4789027	4789831
chr2R	-	4806968	4807027
chr2R	-	4806971	4807027
chr2R	+	487592	494267
chr2R	+	487592	495862
chr2R	+	494825	495862
chr2R	+	4983707	4983886
chr2R	+	4983707	4984174
chr2R	+	4983943	4984174
chr2R	+	5003956	5004681
chr2R	+	5004356	5004681
chr2R	-	5011650	5012247
chr2R	-	5011650	5013054
chr2R	-	5012725	5013054
chr2R	-	5030741	5030896
chr2R	-	5030741	5031123
chr2R	-	5030900	5031123
chr2R	-	5118153	5118609
chr2R	-	5118153	5119251
chr2R	-	5118685	5119251
chr2R	+	5128678	5128736
chr2R	+	5128678	5128749
chr2R	-	5143214	5143332
chr2R	-	5143214	5146343
chr2R	-	5208679	5238175
chr2R	-	5208715	5238175
chr2R	-	5238678	5238912
chr2R	-	5238678	5238932
chr2R	-	5238678	5238944
chr2R	-	5238678	5238965
chr2R	-	5238678	5239045
chr2R	-	5287373	5287451
chr2R	-	5288653	5289279
chr2R	-	5288653	5289912
chr2R	-	5289739	5289912
chr2R	+	5311771	5311832
chr2R	+	5311771	5311835
chr2R	+	5320733	5321710
chr2R	+	5320733	5321857
chr2R	-	5325237	5328205
chr2R	-	5325237	5328695
chr2R	+	5362709	5362812
chr2R	+	5362709	5363604
chr2R	+	5362930	5363604
chr2R	+	5398704	5410441
chr2R	+	5398704	5414791
chr2R	+	5405077	5414791
chr2R	+	5416132	5416474
chr2R	+	5416132	5417593
chr2R	+	5416138	5417593
chr2R	+	5416508	5417593
chr2R	+	5417711	5418403
chr2R	+	5417711	5419849
chr2R	+	5467292	5467466
chr2R	+	5467341	5467466
chr2R	+	5475196	5475280
chr2R	+	5475211	5475280
chr2R	+	560564	560617
chr2R	+	560567	560617
chr2R	+	560567	560624
chr2R	+	560728	560780
chr2R	+	560728	560783
chr2R	-	5700169	5706500
chr2R	-	5700169	5707343
chr2R	-	5706513	5707343
chr2R	-	5717364	5721012
chr2R	-	5717364	5723946
chr2R	-	5740710	5741186
chr2R	-	5740710	5742014
chr2R	-	5773485	5773703
chr2R	-	5773485	5774434
chr2R	-	580300	580751
chr2R	-	580673	580751
chr2R	-	5821882	5828248
chr2R	-	5821882	5845627
chr2R	-	5828458	5845627
chr2R	-	583115	586006
chr2R	-	583115	586562
chr2R	-	586501	586562
chr2R	-	5887420	5888328
chr2R	-	5887420	5892660
chr2R	-	5911707	5913332
chr2R	-	5911707	5913353
chr2R	-	5911802	5913353
chr2R	-	5912751	5913353
chr2R	-	5916562	5918588
chr2R	-	5917763	5918588
chr2R	-	5918924	5919083
chr2R	-	5918924	5919092
chr2R	-	5918951	5919083
chr2R	-	5928627	5929130
chr2R	-	5928627	5929928
chr2R	-	5928627	5930666
chr2R	-	5929096	5929130
chr2R	+	5937149	5937204
chr2R	+	5937149	5937256
chr2R	+	5937404	5937463
chr2R	+	5937409	5937463
chr2R	+	5970831	5970907
chr2R	+	5970831	5970925
chr2R	+	5972927	5978046
chr2R	+	5975109	5978046
chr2R	+	5975273	5978046
chr2R	+	5978304	5979260
chr2R	+	5978304	5980647
chr2R	+	5979501	5980647
chr2R	+	5987243	5991759
chr2R	+	5987355	5991759
chr2R	+	5988602	5991759
chr2R	+	5988930	5991759
chr2R	+	5992572	5993205
chr2R	+	5992579	5993205
chr2R	+	5993330	5993444
chr2R	+	5993330	5993792
chr2R	-	6038542	6040407
chr2R	-	6038557	6040407
chr2R	-	6137332	6137565
chr2R	-	6137332	6137872
chr2R	-	6137332	6138382
chr2R	-	6138091	6138382
chr2R	-	6138649	6139431
chr2R	-	6138718	6139431
chr2R	-	6139489	6139578
chr2R	-	6139489	6139785
chr2R	-	616056	616282
chr2R	-	616056	616310
chr2R	-	616056	616317
chr2R	+	6183552	6192100
chr2R	+	6183552	6192127
chr2R	-	6213399	6213865
chr2R	-	6213399	6216361
chr2R	-	6214043	6216286
chr2R	-	6214043	6216361
chr2R	-	6219872	6222399
chr2R	-	6221449	6222399
chr2R	+	632142	636725
chr2R	+	6322095	6322149
chr2R	+	6322095	6322155
chr2R	+	632399	636725
chr2R	+	6327136	6335702
chr2R	+	6333129	6335702
chr2R	-	6358254	6358717
chr2R	-	6358254	6358943
chr2R	+	637018	637068
chr2R	+	637018	642003
chr2R	-	6376648	6376865
chr2R	-	6376648	6419542
chr2R	-	6376932	6419542
chr2R	-	6378556	6419542
chr2R	-	6384324	6426775
chr2R	-	6386658	6426775
chr2R	-	6387832	6426775
chr2R	-	6388764	6426775
chr2R	-	6389967	6419542
chr2R	-	6390485	6426769
chr2R	-	6394197	6426775
chr2R	-	6395282	6426775
chr2R	-	6397641	6419542
chr2R	-	6398779	6426775
chr2R	-	6401193	6426775
chr2R	-	6403556	6406704
chr2R	-	6403556	6419542
chr2R	-	6403671	6426775
chr2R	-	6406047	6426772
chr2R	-	6406047	6426775
chr2R	-	6406880	6419542
chr2R	-	6409132	6426775
chr2R	-	6409474	6426772
chr2R	-	6410474	6419542
chr2R	-	6410949	6426775
chr2R	-	6413367	6419542
chr2R	-	6414724	6419542
chr2R	-	6415515	6426775
chr2R	-	6416499	6426775
chr2R	-	6417089	6426775
chr2R	-	6417294	6426769
chr2R	-	6418298	6426775
chr2R	-	6421473	6422353
chr2R	-	6421473	6428848
chr2R	-	6421473	6430408
chr2R	-	6422046	6426775
chr2R	-	6423181	6426769
chr2R	-	6424470	6426775
chr2R	+	6449695	6467830
chr2R	+	6449695	6498053
chr2R	+	6457647	6498053
chr2R	+	6604906	6605468
chr2R	+	6604906	6607303
chr2R	+	6619301	6624160
chr2R	+	6623560	6624160
chr2R	-	705439	705501
chr2R	-	705439	705618
chr2R	+	7107217	7107967
chr2R	+	7107863	7107967
chr2R	-	7115344	7115619
chr2R	-	7115461	7115619
chr2R	-	7116181	7116507
chr2R	-	7116181	7116914
chr2R	-	7116538	7116914
chr2R	-	7182290	7182997
chr2R	-	7182290	7184765
chr2R	-	7183390	7184765
chr2R	-	7245929	7246230
chr2R	-	7245929	7246461
chr2R	-	7269822	7271245
chr2R	-	7269822	7271518
chr2R	+	7332265	7332871
chr2R	+	7332265	7333636
chr2R	+	7332920	7334659
chr2R	+	7333694	7334659
chr2R	+	7339817	7340896
chr2R	+	7339888	7340896
chr2R	-	7532469	7532913
chr2R	-	7532469	7538318
chr2R	-	7533824	7538318
chr2R	-	75352	75449
chr2R	-	75384	75449
chr2R	+	7560347	7560548
chr2R	-	7718843	7719195
chr2R	-	7718843	7719558
chr2R	-	7718843	7726978
chr2R	+	7779689	7781058
chr2R	+	7779689	7783074
chr2R	+	7782844	7783074
chr2R	+	7860545	7861061
chr2R	+	7860545	7862859
chr2R	-	7876068	7876122
chr2R	-	7876068	7876126
chr2R	+	7942723	7943472
chr2R	+	7942723	7943477
chr2R	-	8055708	8055926
chr2R	-	8055708	8058427
chr2R	-	8055708	8061594
chr2R	-	8076509	8076594
chr2R	-	8076544	8076594
chr2R	-	8087544	8087619
chr2R	-	8087544	8087931
chr2R	-	8087746	8088278
chr2R	-	8088055	8088278
chr2R	+	8146963	8147543
chr2R	+	8146970	8147543
chr2R	+	8147693	8152246
chr2R	+	8152180	8152246
chr2R	+	8156940	8161269
chr2R	+	8161048	8161269
chr2R	+	8337287	8337572
chr2R	+	8337287	8339172
chr2R	+	8337287	8339478
chr2R	+	8337741	8339172
chr2R	+	8337741	8339478
chr2R	+	8339217	8339478
chr2R	+	8373106	8373171
chr2R	+	8373110	8373171
chr2R	+	8373543	8373763
chr2R	+	8373543	8374089
chr2R	+	8373815	8374089
chr2R	+	8373815	8374312
chr2R	-	8391353	8391679
chr2R	-	8391353	8392597
chr2R	-	8391353	8392736
chr2R	-	8391353	8394021
chr2R	-	8391353	8394548
chr2R	-	8391353	8394804
chr2R	-	8464498	8466632
chr2R	-	8466056	8466632
chr2R	+	8495683	8496732
chr2R	+	8495683	8498082
chr2R	+	8497141	8498082
chr2R	+	8497381	8498082
chr2R	+	8500356	8501070
chr2R	+	8500389	8501070
chr2R	+	8504446	8504575
chr2R	+	8504446	8504959
chr2R	+	8504705	8505298
chr2R	+	8505089	8505298
chr2R	+	8505645	8505707
chr2R	+	8505645	8505946
chr2R	+	8541563	8541614
chr2R	+	8541563	8541629
chr2R	-	8548701	8555338
chr2R	-	8555275	8555338
chr2R	-	8648026	8648230
chr2R	-	8648026	8648304
chr2R	-	8648026	8648308
chr2R	-	8737733	8740826
chr2R	-	8737733	8756446
chr2R	-	8766215	8766555
chr2R	-	8766215	8766700
chr2R	-	8766651	8767192
chr2R	-	8766727	8767192
chr2R	+	8811852	8811925
chr2R	+	8811856	8811925
chr2R	-	8838854	8839676
chr2R	-	8839383	8839676
chr2R	-	9054140	9055389
chr2R	-	9054140	9055406
chr2R	-	9075413	9077064
chr2R	-	9075413	9085180
chr2R	-	9156598	9156895
chr2R	-	9156613	9156895
chr2R	-	9303120	9303378
chr2R	-	9303120	9304078
chr2R	-	9303462	9306490
chr2R	-	9304111	9306490
chr2R	-	9305333	9306490
chr2R	+	9339531	9339598
chr2R	+	9339531	9339825
chr2R	-	9375637	9376420
chr2R	-	9375637	9377245
chr2R	-	9375637	9378243
chr2R	-	9376553	9378938
chr2R	-	9377378	9378938
chr2R	-	9378376	9378938
chr2R	-	9419124	9420164
chr2R	-	9419124	9420166
chr2R	-	9419124	9420250
chr2R	-	9419124	9421610
chr2R	-	9419307	9420164
chr2R	-	9437421	9439611
chr2R	-	9437421	9440501
chr2R	-	9469371	9469665
chr2R	-	9469371	9470302
chr2R	-	9469699	9470302
chr2R	+	9511335	9531225
chr2R	+	9511335	9541787
chr2R	+	9702291	9702471
chr2R	+	9702291	9703058
chr2R	+	9702529	9703058
[truncated: 4,455 more rows]

## Sheet: Head
Chromosome	Strand	Start coordinate	End coordinate
chr2L	+	10007178	10007250
chr2L	+	10007178	10007253
chr2L	+	10009536	10010735
chr2L	+	10010557	10010735
chr2L	-	1014099	1014122
chr2L	-	1014099	1014248
chr2L	-	1014102	1014248
chr2L	-	10178477	10179435
chr2L	-	10178477	10180105
chr2L	-	10217180	10217339
chr2L	-	10217180	10217351
chr2L	-	10218889	10220691
chr2L	-	10218889	10220795
chr2L	-	10218889	10220833
chr2L	-	10218889	10220867
chr2L	-	10225811	10225872
chr2L	-	10225811	10226663
chr2L	+	10232659	10233479
chr2L	+	10232659	10233755
chr2L	+	10233561	10233755
chr2L	+	10264264	10264547
chr2L	+	10264264	10264550
chr2L	+	10264885	10264945
chr2L	+	10264889	10264945
chr2L	-	10275384	10275447
chr2L	-	10275387	10275447
chr2L	-	10330592	10330965
chr2L	-	10330592	10331078
chr2L	-	1034190	1034400
chr2L	-	1034190	1042962
chr2L	-	1034190	1046808
chr2L	-	10350777	10350946
chr2L	-	10350777	10351713
chr2L	+	10376553	10376764
chr2L	+	10376553	10377246
chr2L	+	10376884	10377246
chr2L	+	10398740	10399315
chr2L	+	10398749	10399315
chr2L	+	10399676	10399766
chr2L	+	10399688	10399766
chr2L	+	10399712	10399766
chr2L	+	10408386	10408737
chr2L	+	10408386	10409709
chr2L	+	10427003	10427074
chr2L	+	10427008	10427074
chr2L	+	10459280	10459382
chr2L	+	10459280	10459660
chr2L	+	10459517	10459878
chr2L	+	10459795	10459878
chr2L	-	10465094	10465287
chr2L	-	10465094	10465934
chr2L	-	10465376	10465934
chr2L	-	1047022	1047856
chr2L	-	1047022	1047858
chr2L	-	1047022	1047944
chr2L	-	1047022	1047954
chr2L	+	10481570	10481620
chr2L	+	10481570	10481645
chr2L	+	10482574	10482623
chr2L	+	10482574	10482635
chr2L	-	10506106	10506541
chr2L	-	10506106	10506682
chr2L	+	10530669	10530854
chr2L	+	10530675	10530854
chr2L	+	10535700	10535765
chr2L	+	10535703	10535765
chr2L	-	10576692	10576754
chr2L	-	10576695	10576754
chr2L	+	10620635	10621418
chr2L	+	10620635	10622695
chr2L	+	10621452	10622695
chr2L	-	10684008	10684052
chr2L	-	10684008	10684124
chr2L	-	10684107	10684166
chr2L	-	10684143	10684166
chr2L	-	10686712	10686765
chr2L	-	10686712	10686783
chr2L	-	10686730	10686765
chr2L	-	10686730	10686783
chr2L	-	10686748	10686783
chr2L	-	10693135	10693362
chr2L	-	10693189	10693332
chr2L	-	10693189	10693986
chr2L	-	10693195	10693419
chr2L	-	10693195	10693542
chr2L	-	10693234	10693419
chr2L	-	10693240	10693440
chr2L	-	10693240	10693737
chr2L	-	10693249	10693434
chr2L	-	10693249	10693833
chr2L	-	10693300	10693332
chr2L	-	10693321	10693353
chr2L	-	10693321	10693434
chr2L	-	10693333	10693362
chr2L	-	10693354	10693383
chr2L	-	10693354	10693434
chr2L	-	10693363	10693383
chr2L	-	10693378	10693542
chr2L	-	10693384	10693494
chr2L	-	10693384	10693521
chr2L	-	10693384	10693632
chr2L	-	10693384	10693737
chr2L	-	10693387	10693434
chr2L	-	10693387	10693593
chr2L	-	10693405	10693506
chr2L	-	10693405	10693611
chr2L	-	10693405	10693632
chr2L	-	10693408	10693506
chr2L	-	10693408	10693542
chr2L	-	10693420	10693737
chr2L	-	10693420	10693749
chr2L	-	10693435	10693593
chr2L	-	10693435	10693611
chr2L	-	10693489	10693737
chr2L	-	10693525	10693563
chr2L	-	10693525	10693593
chr2L	-	10693525	10693611
chr2L	-	10693525	10693632
chr2L	-	10693525	10693686
chr2L	-	10693543	10693563
chr2L	-	10693543	10693632
chr2L	-	10693543	10693986
chr2L	-	10693594	10693617
chr2L	-	10693594	10693632
chr2L	-	10693594	10693686
chr2L	-	10693594	10693893
chr2L	-	10693612	10693632
chr2L	-	10693612	10693650
chr2L	-	10693612	10693698
chr2L	-	10693612	10693737
chr2L	-	10693612	10693785
chr2L	-	10693612	10693881
chr2L	-	10693612	10693893
chr2L	-	10693612	10693986
chr2L	-	10693633	10693686
chr2L	-	10693633	10693698
chr2L	-	10693633	10693722
chr2L	-	10693633	10693785
chr2L	-	10693633	10693908
chr2L	-	10693633	10694007
chr2L	-	10693636	10693737
chr2L	-	10693651	10693698
chr2L	-	10693699	10693881
chr2L	-	10693750	10694007
chr2L	-	10693864	10693893
chr2L	-	10732121	10732184
chr2L	-	10732125	10732184
chr2L	-	10746075	10755902
chr2L	-	10746078	10746250
chr2L	-	10746078	10752519
chr2L	-	10746078	10753302
chr2L	-	10746078	10753315
chr2L	-	10746078	10755902
chr2L	-	10753718	10755902
chr2L	+	107838	108586
chr2L	+	10790367	10790414
chr2L	+	10790367	10790425
chr2L	+	108101	108586
chr2L	+	108226	108586
chr2L	+	108346	108586
chr2L	-	10842273	10842379
chr2L	-	10842273	10842383
chr2L	-	10848863	10849029
chr2L	-	10848863	10850752
chr2L	+	10851687	10853108
chr2L	+	10852885	10853108
chr2L	-	1088106	1101919
chr2L	-	1088106	1102321
chr2L	-	10966409	10966500
chr2L	-	10966409	10968436
chr2L	+	10978706	10978878
chr2L	+	10978706	10979631
chr2L	+	10978706	10980443
chr2L	+	10978981	10979631
chr2L	+	10978981	10980443
chr2L	+	10979713	10980443
chr2L	+	10989870	10990094
chr2L	+	10989870	10991057
chr2L	+	10989874	10990094
chr2L	+	10989874	10991057
chr2L	+	10990783	10991057
chr2L	+	10994021	10994324
chr2L	+	10994021	10994847
chr2L	+	10994021	10997333
chr2L	-	1101968	1102321
chr2L	-	11055476	11056410
chr2L	-	11055479	11056410
chr2L	-	11055479	11066543
chr2L	-	11076855	11076925
chr2L	-	11076861	11076925
chr2L	-	11076864	11076925
chr2L	-	11077233	11081152
chr2L	-	11077238	11081152
chr2L	+	110877	111003
chr2L	+	110877	111905
chr2L	-	11103169	11103321
chr2L	-	11103169	11103842
chr2L	-	11103409	11103842
chr2L	+	111117	111905
chr2L	+	111117	112688
chr2L	-	11160336	11161066
chr2L	-	11160336	11161553
chr2L	-	11160336	11162260
chr2L	-	11160336	11162982
chr2L	-	11161290	11162982
chr2L	-	11161834	11162982
chr2L	-	11162525	11162982
chr2L	-	11163922	11164718
chr2L	-	11163937	11164718
chr2L	-	11163937	11165601
chr2L	-	11163949	11165562
chr2L	-	11163949	11165583
chr2L	-	11163949	11165601
chr2L	-	11164755	11165562
chr2L	-	11164755	11165583
chr2L	-	11164755	11165601
chr2L	-	11166143	11166688
chr2L	-	11166143	11170366
chr2L	-	11166143	11175159
chr2L	-	1117516	1118564
chr2L	-	1117516	1128127
chr2L	+	112019	112688
chr2L	-	1123439	1128127
chr2L	+	11236798	11236928
chr2L	+	11236828	11236928
chr2L	+	11237554	11255461
chr2L	+	11237554	11258213
chr2L	+	11278485	11278573
chr2L	+	11278485	11278753
chr2L	+	11278673	11278753
chr2L	+	1139763	1139827
chr2L	+	1139763	1139830
chr2L	-	11435924	11436210
chr2L	-	11435924	11436214
chr2L	-	11510850	11511054
chr2L	-	11510850	11511177
chr2L	-	1153731	1154280
chr2L	-	1153731	1158077
chr2L	-	1156008	1158077
chr2L	+	1158782	1158865
chr2L	+	1158806	1158865
chr2L	+	1158810	1158865
chr2L	+	1174266	1174495
chr2L	+	1174266	1174908
chr2L	+	1177861	1177946
chr2L	+	1177868	1177946
chr2L	+	1179196	1179450
chr2L	+	1179196	1179858
chr2L	+	1179525	1179858
chr2L	-	11797741	11797827
chr2L	-	11797741	11798663
chr2L	-	11798041	11798663
chr2L	-	11799402	11800153
chr2L	-	11799402	11802285
chr2L	-	11799405	11800153
chr2L	-	11800322	11802285
chr2L	-	11800322	11802369
chr2L	-	11800322	11803783
chr2L	-	11803674	11803783
chr2L	-	11806157	11808012
chr2L	-	11806157	11809124
chr2L	-	11818849	11830275
chr2L	-	11818849	11832723
chr2L	-	11818849	11833258
chr2L	-	11830831	11833258
chr2L	-	11832787	11833258
chr2L	-	11838773	11858889
chr2L	-	11838773	11896209
chr2L	-	11838773	11911684
chr2L	+	1186015	1191401
chr2L	+	1186452	1191401
chr2L	+	1191534	1191597
chr2L	+	1191538	1191597
chr2L	+	1192198	1192254
chr2L	+	1192198	1192266
chr2L	-	11925715	11928424
chr2L	-	11925715	11928541
chr2L	-	11925728	11928541
chr2L	-	11987387	11987470
chr2L	-	11987387	11987694
chr2L	-	11987494	11987694
chr2L	-	120080	120166
chr2L	-	120080	120419
chr2L	+	12103834	12104490
chr2L	+	12104056	12104490
chr2L	+	12104382	12104490
chr2L	+	12142833	12145068
chr2L	+	12142855	12145068
chr2L	+	12201771	12271589
chr2L	+	12206130	12240866
chr2L	+	12222337	12240866
chr2L	+	12241780	12260948
chr2L	+	12241780	12271589
chr2L	+	12282562	12298566
chr2L	+	12287808	12298566
chr2L	+	12299394	12300359
chr2L	+	12299394	12304444
chr2L	+	12300621	12304444
chr2L	+	12358261	12359599
chr2L	+	12358261	12362599
chr2L	+	12359683	12362599
chr2L	+	12362649	12385560
chr2L	+	12366521	12373581
chr2L	+	12370082	12373581
chr2L	+	12374111	12385560
chr2L	+	12389670	12393389
chr2L	+	12389670	12393420
chr2L	+	12389670	12395898
chr2L	+	12393858	12395898
chr2L	-	12404119	12404434
chr2L	-	12404130	12404434
chr2L	-	12404177	12407183
chr2L	-	12404177	12407207
chr2L	-	12407400	12407548
chr2L	-	12407448	12407548
chr2L	-	12407466	12407548
chr2L	-	12421829	12423321
chr2L	-	12421829	12423332
chr2L	-	12427369	12427467
chr2L	-	12427387	12427467
chr2L	-	12458223	12460587
chr2L	-	12458223	12477113
chr2L	-	12477166	12482559
chr2L	-	12477166	12491687
chr2L	-	12477166	12498523
chr2L	-	12477166	12504077
chr2L	-	12477166	12516482
chr2L	-	12477166	12536273
chr2L	-	12498903	12504077
chr2L	-	12517185	12536273
chr2L	-	12520176	12536273
chr2L	-	126227	128798
chr2L	-	126227	130506
chr2L	+	12695162	12695303
chr2L	+	12695162	12696265
chr2L	+	12695523	12696265
chr2L	-	12714296	12721449
chr2L	-	12718056	12721449
chr2L	+	12724343	12724470
chr2L	+	12724343	12724763
chr2L	+	12724343	12725710
chr2L	+	12724618	12725710
chr2L	+	12724911	12725710
chr2L	+	12727116	12728019
chr2L	+	12727116	12729929
chr2L	+	12727116	12730841
chr2L	+	12727116	12736034
chr2L	+	12727116	12737396
chr2L	+	12727116	12737957
chr2L	+	12728241	12729929
chr2L	+	12728241	12737957
chr2L	+	12729405	12737957
chr2L	+	12730151	12737957
chr2L	+	12731066	12737957
chr2L	+	12736256	12737957
chr2L	+	12737618	12737957
chr2L	-	128942	130506
chr2L	-	13003715	13003972
chr2L	-	13003715	13004039
chr2L	-	13018174	13018788
chr2L	-	13018177	13018788
chr2L	-	13025497	13026527
chr2L	-	13025497	13027064
chr2L	-	13025497	13027343
chr2L	-	13025497	13027369
chr2L	-	13028539	13028866
chr2L	-	13028551	13028866
chr2L	-	13031394	13035823
chr2L	-	13031394	13050136
chr2L	-	13164740	13164823
chr2L	-	13164762	13164823
chr2L	-	13170784	13171311
chr2L	-	13170784	13171380
chr2L	-	13173941	13174437
chr2L	-	13173941	13175665
chr2L	-	13175276	13175665
chr2L	+	13195377	13195579
chr2L	+	13195404	13195579
chr2L	+	13208777	13208993
chr2L	+	13208777	13209434
chr2L	+	13208777	13209470
chr2L	+	13208777	13209491
chr2L	+	13209012	13209470
chr2L	-	13214825	13214945
chr2L	-	13214825	13215080
chr2L	+	13261692	13271294
chr2L	+	13267972	13271294
chr2L	+	13271627	13272232
chr2L	+	13271972	13272232
chr2L	+	13272616	13272663
chr2L	+	13272616	13272819
chr2L	+	13274376	13274641
chr2L	+	13274376	13274650
chr2L	+	13274376	13274689
chr2L	+	13274376	13276245
chr2L	+	13274850	13275586
chr2L	+	13274850	13276245
chr2L	+	13275838	13276245
chr2L	+	13275865	13276245
chr2L	+	13276512	13277042
chr2L	+	13276512	13283359
chr2L	+	13287313	13287372
chr2L	+	13287313	13287375
chr2L	+	13291291	13292540
chr2L	+	13291291	13297617
chr2L	+	13296745	13297617
chr2L	+	13384022	13384655
chr2L	+	13384022	13384982
chr2L	+	13384022	13384985
chr2L	+	13384794	13384982
chr2L	+	13384794	13384985
chr2L	-	13386257	13386486
chr2L	-	13386257	13386528
chr2L	+	1344515	1344568
chr2L	+	1344515	1344579
chr2L	+	13462200	13483445
chr2L	+	13462275	13483445
chr2L	+	13476433	13496589
chr2L	+	13485249	13486916
chr2L	+	13485249	13489469
chr2L	+	13485249	13496589
chr2L	+	13486977	13496589
chr2L	+	13489578	13496589
chr2L	-	13509792	13512958
chr2L	-	13509792	13534905
chr2L	-	13513470	13534905
chr2L	-	13513473	13534905
chr2L	-	13547161	13547691
chr2L	-	13547161	13549130
chr2L	-	13547303	13549130
chr2L	+	13558832	13578199
chr2L	+	13558832	13609789
chr2L	+	13636001	13637286
chr2L	+	13636213	13636382
chr2L	+	13636213	13637286
chr2L	+	13636761	13637286
chr2L	+	13636843	13637286
chr2L	+	13669385	13669543
chr2L	+	13669385	13670436
chr2L	+	13670597	13671017
chr2L	+	13670597	13671413
chr2L	+	13670597	13672137
chr2L	-	13679117	13683121
chr2L	-	13679117	13684202
chr2L	-	13683209	13684202
chr2L	-	13775047	13775253
chr2L	-	13775185	13775253
chr2L	+	13836432	13891298
chr2L	+	13879706	13891298
chr2L	+	13891532	13895027
chr2L	+	13894375	13895027
chr2L	-	13903931	13904103
chr2L	-	13903931	13904396
chr2L	-	13922632	13922709
chr2L	-	13933391	13933420
chr2L	-	13933391	13933426
chr2L	-	13933391	13933444
chr2L	-	13933391	13933462
chr2L	-	13933403	13933426
chr2L	-	13945393	13945476
chr2L	-	13945393	13945494
chr2L	-	13945393	13945554
chr2L	-	13945393	13945620
chr2L	-	13945393	13945638
chr2L	-	13945393	13945686
chr2L	-	13945465	13945506
chr2L	-	13945507	13945584
chr2L	-	13945507	13945989
chr2L	-	13945555	13945584
chr2L	-	13945555	13945620
chr2L	-	13945621	13945686
chr2L	-	13975879	13975976
chr2L	-	13975879	13976475
chr2L	+	14040276	14041319
chr2L	+	14040378	14041319
chr2L	+	14040394	14041319
chr2L	+	14040465	14041319
chr2L	-	14108647	14108808
chr2L	-	14108746	14108808
chr2L	-	14197867	14217025
chr2L	-	14197867	14222015
chr2L	-	14217069	14222015
chr2L	+	14288958	14319552
chr2L	+	14309177	14319552
chr2L	+	14341576	14342776
chr2L	+	14341576	14342851
chr2L	+	14341576	14342854
chr2L	+	14355473	14357339
chr2L	+	14357271	14357339
chr2L	-	14393058	14408366
chr2L	-	14393061	14408366
chr2L	-	14547795	14547865
chr2L	-	14547812	14547865
chr2L	-	14600875	14601130
chr2L	-	14600875	14601685
chr2L	-	14601480	14601685
chr2L	+	14615643	14616037
chr2L	+	14615643	14616050
chr2L	+	14615643	14616056
chr2L	+	14615643	14616127
chr2L	+	14615643	14616214
chr2L	+	14615643	14616301
chr2L	+	14615876	14616301
chr2L	-	14636159	14639741
chr2L	-	14636159	14688464
chr2L	-	14639769	14688464
chr2L	-	14737494	14741507
chr2L	-	14737494	14741519
chr2L	-	14737548	14741519
chr2L	-	14846494	14846788
chr2L	-	14846494	14848003
chr2L	-	14847057	14848672
chr2L	-	14848254	14848672
chr2L	-	14875436	14875504
chr2L	-	14875450	14875504
chr2L	-	15053522	15057503
chr2L	-	15053522	15057666
chr2L	-	15067689	15067914
chr2L	-	15067689	15067951
chr2L	-	15067689	15067994
chr2L	-	15067689	15070144
chr2L	+	15088430	15089043
chr2L	+	15088430	15090897
chr2L	+	15089110	15090897
chr2L	+	15092641	15092897
chr2L	+	15092641	15093417
chr2L	+	15093036	15093417
chr2L	+	15093683	15094132
chr2L	+	15093683	15094677
chr2L	+	15094232	15094677
chr2L	+	15114213	15114298
chr2L	+	15114234	15114298
chr2L	-	15163764	15164102
chr2L	-	15163764	15164205
chr2L	-	15164130	15164205
chr2L	-	15257586	15257797
chr2L	-	15257703	15257797
chr2L	-	15258105	15258171
chr2L	-	15258130	15258171
chr2L	-	15258938	15261716
chr2L	-	15261637	15261716
chr2L	-	15269204	15269372
chr2L	-	15269204	15270903
chr2L	-	15271143	15271616
chr2L	-	15271143	15271832
chr2L	+	155178	155636
chr2L	+	155429	155565
chr2L	+	155429	155636
chr2L	+	1555205	1556538
chr2L	+	1555205	1556657
chr2L	+	1555205	1556831
chr2L	+	15552809	15554508
chr2L	+	15552814	15554508
chr2L	-	15649518	15649697
chr2L	-	15649518	15650171
chr2L	-	15649731	15650171
chr2L	-	15760574	15762567
chr2L	-	15760574	15762687
chr2L	+	15765577	15765673
chr2L	+	15765589	15765673
chr2L	-	15940082	15961999
chr2L	-	15940082	15962007
chr2L	+	16001254	16013951
chr2L	-	16006094	16006165
chr2L	-	16006115	16006165
chr2L	+	16008058	16013951
chr2L	+	1604885	1605094
chr2L	+	1604885	1606388
chr2L	+	1605485	1606388
chr2L	+	16080196	16080444
chr2L	+	16080196	16080474
chr2L	+	16166451	16171970
chr2L	+	16171048	16171970
chr2L	+	16171144	16171970
chr2L	+	16177394	16177676
chr2L	+	16177394	16178373
chr2L	+	16177804	16178373
chr2L	+	16177804	16178905
chr2L	+	16178492	16178905
chr2L	+	16179546	16180137
chr2L	+	16179546	16181802
chr2L	+	16180246	16182777
chr2L	+	16181911	16182777
chr2L	+	16185626	16186109
chr2L	+	16185626	16187453
chr2L	+	16185626	16189023
chr2L	+	16186151	16189023
chr2L	+	16187840	16189023
chr2L	-	16247384	16247502
chr2L	-	16247384	16248600
chr2L	-	16247764	16248600
chr2L	-	16249091	16250079
chr2L	-	16249706	16250079
chr2L	-	16250158	16251239
chr2L	-	16250158	16251622
chr2L	-	16250158	16256048
chr2L	-	16250158	16257074
chr2L	+	163001	164157
chr2L	+	163001	175359
chr2L	+	163001	183759
chr2L	-	16349472	16349985
chr2L	-	16349472	16351925
chr2L	-	16475405	16481523
chr2L	-	16475411	16481523
chr2L	-	16475432	16481523
chr2L	+	16492051	16505494
chr2L	+	16497151	16505494
chr2L	-	16511446	16519968
chr2L	-	16511446	16527388
chr2L	+	1651411	1652773
chr2L	+	1651429	1652773
chr2L	+	1651712	1652773
chr2L	+	16559944	16652741
chr2L	+	16622841	16652741
chr2L	+	16652912	16657497
chr2L	+	16657429	16657497
chr2L	+	16680276	16690900
chr2L	+	16685941	16690900
chr2L	-	16705789	16708117
chr2L	-	16705789	16715769
chr2L	+	16719976	16722007
chr2L	+	16720810	16722007
chr2L	-	16724993	16725890
chr2L	-	16724993	16727008
chr2L	-	16726113	16727008
chr2L	+	16766756	16768582
chr2L	+	16767959	16768582
chr2L	+	16768884	16769145
chr2L	+	16768884	16769457
chr2L	+	16769290	16770455
chr2L	+	16769602	16770455
chr2L	+	16771141	16771341
chr2L	+	16771141	16773275
chr2L	+	16771446	16774448
chr2L	+	16773380	16774448
chr2L	+	16774857	16775209
chr2L	+	16774857	16775681
chr2L	+	16774857	16776261
chr2L	+	16775381	16776848
chr2L	+	16775853	16776848
chr2L	+	16776433	16776848
chr2L	+	16777439	16777629
chr2L	+	16777439	16778003
chr2L	+	16777439	16778388
chr2L	+	16777439	16779091
chr2L	+	16777439	16779726
chr2L	+	16777748	16780548
chr2L	+	16778122	16780548
chr2L	+	16778507	16780548
chr2L	+	16779210	16780548
chr2L	+	16783661	16783831
chr2L	+	16783661	16784249
chr2L	+	16783911	16784664
chr2L	+	16784329	16784664
chr2L	+	16786814	16787077
chr2L	+	16786814	16787515
chr2L	+	16786814	16788019
chr2L	+	16787580	16788019
chr2L	+	16799133	16799659
chr2L	+	16799133	16799679
chr2L	+	16816719	16820110
chr2L	+	16816792	16820110
chr2L	+	16839355	16840268
chr2L	+	16839355	16841343
chr2L	+	16840208	16840268
chr2L	+	16840578	16841343
chr2L	-	16844801	16846628
chr2L	-	16844801	16846749
chr2L	+	16870997	16876895
chr2L	+	16870997	16877495
chr2L	+	16889125	16889215
chr2L	+	16889125	16891456
chr2L	+	16896357	16896807
chr2L	+	16896357	16897486
chr2L	+	16896904	16897486
chr2L	+	16904131	16904235
chr2L	+	16904143	16904235
chr2L	+	16904661	16905297
chr2L	+	16904712	16905297
chr2L	-	1718491	1718673
chr2L	-	1718491	1718694
chr2L	-	1718491	1718738
chr2L	-	17207	18259
chr2L	-	17212	18259
chr2L	-	17212	19878
chr2L	+	1732654	1741658
chr2L	-	17368388	17372563
chr2L	-	17371820	17372563
chr2L	+	1738019	1741658
chr2L	+	17385895	17394428
chr2L	+	17385895	17400394
chr2L	+	17386393	17394428
chr2L	+	17389530	17394428
chr2L	+	17389530	17394431
chr2L	+	17389530	17400394
chr2L	+	17394492	17398595
chr2L	+	17394492	17398852
chr2L	+	17394492	17400394
chr2L	+	17398716	17398852
chr2L	+	17398895	17400394
chr2L	+	17401290	17401514
chr2L	+	17401290	17401517
chr2L	+	17401290	17402373
chr2L	+	17401581	17402373
chr2L	+	17401581	17404059
chr2L	+	17402485	17404059
chr2L	+	17402485	17404728
chr2L	-	17420113	17427654
chr2L	-	17420113	17432856
chr2L	-	17443005	17445247
chr2L	-	17443005	17448276
chr2L	-	17443005	17449294
chr2L	-	17461843	17462029
chr2L	-	17461843	17462166
chr2L	-	17480919	17480967
chr2L	-	17480919	17480971
chr2L	+	175447	183759
chr2L	-	17651491	17652665
chr2L	-	17651491	17655667
chr2L	-	17652905	17657061
chr2L	-	17655910	17657061
chr2L	-	17664224	17665377
chr2L	-	17664224	17666610
chr2L	-	17665540	17667700
chr2L	-	17666776	17667700
chr2L	-	17711409	17714304
chr2L	-	17711409	17715721
chr2L	-	17714496	17717841
chr2L	-	17715913	17717841
chr2L	-	17716689	17717841
chr2L	-	17739713	17751937
chr2L	-	17739713	17761290
chr2L	-	17815717	17827419
chr2L	-	17815717	17863935
chr2L	+	17969518	17971870
chr2L	+	17969518	17972261
chr2L	+	17972003	17972261
chr2L	+	17972018	17972261
chr2L	+	18013032	18026953
chr2L	+	18013032	18033762
chr2L	+	18027001	18033762
chr2L	+	18120072	18123347
chr2L	+	18120077	18123347
chr2L	+	18120204	18123347
chr2L	+	18122588	18123347
chr2L	-	18210145	18210555
chr2L	-	18210148	18210555
chr2L	-	18211298	18215462
chr2L	-	18211298	18215763
chr2L	-	18211298	18246023
chr2L	-	18215703	18215763
chr2L	-	18215846	18246023
chr2L	+	1836652	1837017
chr2L	+	1836652	1837189
chr2L	+	1836652	1842897
chr2L	+	1837406	1842897
chr2L	+	18384893	18386155
chr2L	+	18384893	18387285
chr2L	+	18387317	18388380
chr2L	+	18387317	18391050
chr2L	+	18387317	18392243
chr2L	+	18391364	18392063
chr2L	+	18391364	18392243
chr2L	+	18392135	18392243
chr2L	-	18443062	18443151
chr2L	-	18443070	18443151
chr2L	-	18443073	18443151
chr2L	-	18473328	18473386
chr2L	-	18473328	18473394
chr2L	-	18474582	18474901
chr2L	-	18474582	18475152
chr2L	-	18474956	18475152
chr2L	+	1854308	1855362
chr2L	+	1854308	1855371
chr2L	-	18543715	18546523
chr2L	-	18543715	18565375
chr2L	-	18547044	18562708
chr2L	-	18547044	18562881
chr2L	-	18565448	18571241
chr2L	+	18593170	18593276
chr2L	+	18593170	18593288
chr2L	-	18693515	18695043
chr2L	+	18813143	18813296
chr2L	+	18813143	18813321
chr2L	+	18823602	18824298
chr2L	+	18823759	18824298
chr2L	-	18857403	18857540
chr2L	-	18857403	18857586
chr2L	-	18857403	18858950
chr2L	-	18858462	18858950
chr2L	-	18960680	18962883
chr2L	-	18961692	18962883
chr2L	-	18962791	18962883
chr2L	-	18963469	18963991
chr2L	-	18963649	18963991
chr2L	+	19003736	19003946
chr2L	+	19003879	19003946
chr2L	-	19008543	19008722
chr2L	-	19008543	19008947
chr2L	-	19044303	19044368
chr2L	-	19044317	19044368
chr2L	-	19081994	19082918
chr2L	-	19081994	19105721
chr2L	+	1910149	1932054
chr2L	+	19110646	19112792
chr2L	+	19112315	19112792
chr2L	-	19119241	19119317
chr2L	-	19119241	19120108
chr2L	-	19119474	19120108
chr2L	+	1913663	1932054
chr2L	+	19145844	19166083
chr2L	+	19158755	19166083
chr2L	+	19165988	19166083
chr2L	-	19183452	19183510
chr2L	-	19183461	19183510
chr2L	+	1928575	1932054
chr2L	+	19364522	19364972
chr2L	+	19364567	19364972
chr2L	+	1937583	1937864
chr2L	+	1937583	1938506
chr2L	+	1937910	1938506
chr2L	+	1938619	1938863
chr2L	+	1938619	1938886
chr2L	+	1938619	1941580
chr2L	-	19387769	19387850
chr2L	-	19387769	19387860
chr2L	-	19387769	19388038
chr2L	-	19387936	19388038
chr2L	-	19388569	19389426
chr2L	-	19388569	19389472
chr2L	-	19388569	19389763
chr2L	-	19388569	19389925
chr2L	-	19388569	19389934
chr2L	-	19393656	19398345
chr2L	-	19393656	19398349
chr2L	-	19401372	19403997
chr2L	-	19403716	19403997
chr2L	-	19404682	19404748
chr2L	-	19404682	19409402
chr2L	-	19410643	19411535
chr2L	-	19410643	19416412
chr2L	-	19410643	19419867
chr2L	-	19410643	19426204
chr2L	-	19411719	19414379
chr2L	-	19411719	19414410
chr2L	+	1941393	1941580
chr2L	-	19420191	19423266
chr2L	-	19420191	19423277
chr2L	-	19420191	19423413
chr2L	+	19424212	19427207
chr2L	+	19424212	19429400
chr2L	+	19426698	19427207
chr2L	+	19433063	19434665
chr2L	+	19433913	19434665
chr2L	-	19437845	19438007
chr2L	-	19437845	19441157
chr2L	-	19440077	19441157
chr2L	-	19489212	19489294
chr2L	-	19489212	19489298
chr2L	+	19494498	19494555
chr2L	+	19494498	19494558
chr2L	-	19508261	19508324
chr2L	-	19508265	19508324
chr2L	-	19508265	19508350
chr2L	-	19510137	19510569
chr2L	-	19510512	19510569
chr2L	-	19511373	19511426
chr2L	-	19511389	19511426
chr2L	-	19512980	19513042
chr2L	-	19512983	19513042
chr2L	-	19514350	19514929
chr2L	-	19514852	19514929
chr2L	-	19514859	19514929
chr2L	-	1952879	1954312
chr2L	-	1952879	1969951
chr2L	+	19530189	19530888
chr2L	+	19530189	19530912
chr2L	+	19553915	19553968
chr2L	+	19553915	19553974
chr2L	-	19569226	19571570
chr2L	-	19569226	19577184
chr2L	-	19571767	19577184
chr2L	+	19587086	19600856
chr2L	+	19587376	19600856
chr2L	+	19587527	19600856
chr2L	+	19611626	19643329
chr2L	+	19611626	19644266
chr2L	+	19643372	19644266
chr2L	+	19702034	19714887
chr2L	+	19702350	19714887
chr2L	+	19717454	19719701
chr2L	+	19717454	19725893
chr2L	+	19719999	19724933
chr2L	+	19719999	19725893
chr2L	+	19724943	19725893
chr2L	+	1974480	1974540
chr2L	+	1974480	1974562
chr2L	-	19762831	19763424
chr2L	-	19762831	19764068
chr2L	-	19763497	19764068
chr2L	-	19779330	19779398
chr2L	-	19779333	19779398
chr2L	-	19782825	19791268
chr2L	-	19782825	19791762
chr2L	-	19793402	19794581
chr2L	-	19794308	19794581
chr2L	+	19807585	19857668
chr2L	+	19828878	19857668
chr2L	+	19857840	19886942
chr2L	-	1986105	1986795
chr2L	-	1986105	1987583
chr2L	+	19866509	19886942
chr2L	+	19887320	19907760
chr2L	+	19902187	19907760
chr2L	+	19910432	19925381
chr2L	+	19918585	19925381
chr2L	+	19926512	19926619
chr2L	+	19926512	19928621
chr2L	+	19926647	19928621
chr2L	+	19929354	19954551
chr2L	+	19946702	19954551
chr2L	+	19958764	19959265
chr2L	+	19958768	19959265
chr2L	+	19958909	19959265
chr2L	+	19964581	19964642
chr2L	+	19964581	19964644
chr2L	+	19964998	19965061
chr2L	+	19965010	19965061
chr2L	-	19967510	19967564
chr2L	-	19967510	19967572
chr2L	+	199743	199901
chr2L	+	199743	200118
chr2L	+	199983	200118
chr2L	-	20079472	20080004
chr2L	-	20079472	20084576
chr2L	-	20083015	20084576
chr2L	+	2010313	2026766
chr2L	+	2017851	2026766
chr2L	+	2028249	2028301
chr2L	+	2028249	2028319
chr2L	+	20336404	20336462
chr2L	+	20336404	20336465
chr2L	+	20336404	20336468
chr2L	+	20336549	20339057
chr2L	+	20336549	20339243
chr2L	+	20339088	20339243
chr2L	+	20340112	20343597
chr2L	+	20342481	20343597
chr2L	+	20343286	20343597
chr2L	+	20343338	20343597
chr2L	+	20343947	20344653
chr2L	+	20343947	20345171
chr2L	+	20343947	20345523
chr2L	+	20345259	20345523
chr2L	+	20350894	20355361
chr2L	+	20354067	20355361
chr2L	+	20356801	20356874
chr2L	+	20356801	20360011
chr2L	+	20360812	20361967
chr2L	+	20360812	20364295
chr2L	+	20362826	20364295
chr2L	-	20387592	20399090
chr2L	-	20387592	20399204
chr2L	-	20387592	20414332
chr2L	+	20427473	20431922
chr2L	+	20429161	20431922
chr2L	+	20647788	20647962
chr2L	+	20647788	20648196
chr2L	+	20758385	20760523
chr2L	+	20758663	20760523
chr2L	+	20760457	20760523
chr2L	-	20789423	20789584
chr2L	-	20789423	20789719
chr2L	-	20789507	20789584
chr2L	-	20789660	20789719
chr2L	-	20790720	20791165
chr2L	-	20790720	20791228
chr2L	-	20792266	20794058
chr2L	-	20792266	20794117
chr2L	-	20792266	20796035
chr2L	+	20798514	20813154
chr2L	+	20810373	20813154
chr2L	+	20824493	20825657
chr2L	+	20824493	20825666
chr2L	+	20824630	20825270
chr2L	+	20824630	20825666
chr2L	+	20825512	20825666
chr2L	+	20858820	20859723
chr2L	+	20859333	20859723
chr2L	-	20874432	20875636
chr2L	-	20874432	20876585
chr2L	-	20874432	20876910
chr2L	-	20875724	20876585
chr2L	-	20875724	20876910
chr2L	-	20876616	20876910
chr2L	-	20882464	20885287
chr2L	-	20882464	20903014
chr2L	-	20885806	20890157
chr2L	-	20885806	20890181
chr2L	-	20917120	20917272
chr2L	-	20917120	20918092
chr2L	-	20917120	20918125
chr2L	-	20917120	20918797
chr2L	-	20967746	21051684
chr2L	-	20967746	21051772
chr2L	+	21105008	21114592
chr2L	+	21108227	21114592
chr2L	+	21121739	21122249
chr2L	+	21121769	21122249
chr2L	+	21122389	21122911
chr2L	+	21122389	21124133
chr2L	+	21122927	21124133
chr2L	+	21124373	21124438
chr2L	+	21124373	21124441
chr2L	+	21124521	21125315
chr2L	+	21124521	21125345
chr2L	+	21124614	21125345
chr2L	+	21125439	21126157
chr2L	+	21125439	21126193
chr2L	+	21125439	21127848
chr2L	+	21126374	21127848
chr2L	+	21128062	21128738
chr2L	+	21128062	21128777
chr2L	+	21128062	21132032
chr2L	+	21129082	21130003
chr2L	+	21129082	21132032
chr2L	+	21130286	21132032
chr2L	+	21131463	21132032
chr2L	-	21138030	21138111
chr2L	-	21138030	21138710
chr2L	-	21138361	21138710
chr2L	-	21202272	21202432
chr2L	-	21213166	21213221
chr2L	-	21213166	21213226
chr2L	+	21223127	21223190
chr2L	+	21237346	21238279
chr2L	+	21237420	21238279
chr2L	+	21263123	21263646
chr2L	+	21263179	21263646
chr2L	+	21275806	21277195
chr2L	+	21275806	21279882
chr2L	+	21275806	21281130
chr2L	+	21278429	21279882
chr2L	+	21278429	21281130
chr2L	+	21280447	21281130
chr2L	+	21311032	21311191
chr2L	+	21311032	21311751
chr2L	+	21311531	21311751
chr2L	+	21312043	21312096
chr2L	+	21312043	21312123
chr2L	+	21312208	21318125
chr2L	+	21315538	21318125
chr2L	+	21318416	21318483
chr2L	+	21318419	21318483
chr2L	+	21344736	21355475
chr2L	+	21345075	21355475
chr2L	+	21380273	21382017
chr2L	+	21380361	21381005
chr2L	+	21380361	21382017
chr2L	+	21380361	21382040
chr2L	+	21380365	21382017
chr2L	+	21380478	21382017
chr2L	+	21380728	21382017
chr2L	+	21381199	21382017
chr2L	-	2138158	2138344
chr2L	-	2138158	2139628
chr2L	+	21381668	21382017
chr2L	+	21385397	21388501
chr2L	+	21388287	21388501
chr2L	-	2139673	2139726
chr2L	-	2139676	2139726
chr2L	+	2152270	2152661
chr2L	+	2152465	2152661
chr2L	-	215676	215761
chr2L	-	215676	215771
chr2L	-	21615676	21616180
chr2L	-	21615676	21617278
chr2L	-	21616573	21617278
chr2L	-	21618110	21618494
chr2L	-	21618110	21618707
chr2L	-	21618110	21623364
chr2L	-	21669913	21670447
chr2L	-	21669913	21670533
chr2L	-	21670481	21670533
chr2L	-	21673272	21675864
chr2L	-	21673272	21677497
chr2L	+	21719643	21720121
chr2L	+	21719643	21720357
chr2L	+	21720481	21725066
chr2L	+	21720481	21725084
chr2L	+	21725445	21727004
chr2L	+	21725445	21728026
chr2L	+	21727573	21728026
chr2L	-	21743971	21746150
chr2L	-	21743971	21756552
chr2L	+	21758142	21758200
chr2L	+	21758142	21758204
chr2L	-	218885	221504
chr2L	-	218885	226114
chr2L	-	2190643	2190705
chr2L	-	2190646	2190705
chr2L	-	2190784	2191848
chr2L	-	2191078	2191848
chr2L	-	2192845	2192973
chr2L	-	2192848	2192921
chr2L	-	2192848	2192973
chr2L	+	22146996	22154796
chr2L	+	22153706	22154796
chr2L	+	22156815	22157021
chr2L	+	22156815	22158511
chr2L	+	22157055	22158511
chr2L	+	22158387	22158511
chr2L	+	22158721	22160188
chr2L	+	22158721	22160206
chr2L	+	22158721	22161676
chr2L	+	22158721	22161685
chr2L	+	22160339	22161676
chr2L	+	22160349	22161676
chr2L	+	2220951	2223241
chr2L	+	2222298	2223241
chr2L	+	2222770	2223241
chr2L	+	22240103	22240152
chr2L	+	22240103	22240168
chr2L	-	22429110	22429267
chr2L	-	22429110	22429351
chr2L	-	22429297	22429351
chr2L	+	22443788	22446051
chr2L	+	22737579	22741700
chr2L	+	22737579	22741944
chr2L	+	22741824	22741944
chr2L	+	22741987	22742036
chr2L	+	22741987	22742054
chr2L	-	228281	229171
chr2L	-	228281	229928
chr2L	-	228281	230536
chr2L	+	22832741	22832803
chr2L	+	22832745	22832803
chr2L	-	229382	229928
chr2L	-	229382	230536
chr2L	-	22960833	22960930
chr2L	-	22960876	22960930
chr2L	-	229977	230536
chr2L	-	231034	231946
chr2L	-	231034	231961
chr2L	+	2327552	2328020
chr2L	+	2327552	2338378
chr2L	-	2361585	2362673
chr2L	-	2361585	2363403
chr2L	-	2361585	2364443
chr2L	-	2361585	2364593
chr2L	-	2361585	2364639
chr2L	-	2361585	2364835
chr2L	-	2361585	2364888
chr2L	-	2361585	2365059
chr2L	-	2370520	2370610
chr2L	-	2370542	2370610
chr2L	+	2429050	2455055
chr2L	+	2452414	2455055
chr2L	+	2730372	2736172
chr2L	+	2730372	2736309
chr2L	+	2730469	2735719
chr2L	+	2730469	2736172
chr2L	+	2736229	2736309
chr2L	+	2736430	2737030
chr2L	+	2736430	2737035
chr2L	+	2740784	2741106
chr2L	+	2741051	2741106
chr2L	-	27490	28013
chr2L	-	27490	28409
chr2L	-	276903	276957
chr2L	-	276903	276972
chr2L	-	2782665	2783039
chr2L	-	2782839	2783039
chr2L	-	2782940	2783039
chr2L	-	2787162	2791300
chr2L	-	2787162	2792193
chr2L	-	2787168	2789345
chr2L	-	2787168	2792193
chr2L	-	2793264	2793326
chr2L	-	2793270	2793326
chr2L	-	2793908	2798484
chr2L	-	2793908	2799907
chr2L	-	2798836	2799487
chr2L	-	2798836	2799907
chr2L	-	28240	28731
chr2L	-	284968	285431
chr2L	-	284968	286305
chr2L	-	284968	290811
chr2L	+	2857576	2859623
chr2L	+	2857576	2864967
chr2L	+	2859714	2864967
chr2L	+	2862840	2864967
chr2L	-	28639	28731
chr2L	-	2882833	2882918
chr2L	-	2882833	2884355
chr2L	-	2882833	2884991
chr2L	+	2890916	2945028
chr2L	+	2890916	2946707
chr2L	-	29068	30392
chr2L	-	29068	33843
chr2L	-	29068	34556
chr2L	-	29068	35744
chr2L	-	291031	291605
chr2L	-	291031	291659
chr2L	+	2945792	2946707
chr2L	+	2957051	2960688
chr2L	+	2957264	2960688
chr2L	+	2957264	2961216
chr2L	+	2959520	2960688
chr2L	+	2959520	2961216
chr2L	+	2959951	2960688
chr2L	+	2960835	2960893
chr2L	+	2960839	2960893
chr2L	+	2960986	2961213
chr2L	+	2960986	2961216
chr2L	+	2960991	2961216
chr2L	+	2961996	2962270
chr2L	+	2961996	2962584
chr2L	+	2962286	2962584
chr2L	+	2995070	2995410
chr2L	+	2995070	2995434
chr2L	+	2997059	2997490
chr2L	+	2997059	2997789
chr2L	+	2997530	2997789
chr2L	+	3056924	3059603
chr2L	+	3057110	3059603
chr2L	+	306389	317741
chr2L	-	3071764	3080649
chr2L	-	3078503	3080649
chr2L	-	3081268	3086002
chr2L	-	3081268	3089833
chr2L	-	3081268	3094215
chr2L	-	3094375	3094458
chr2L	-	3094375	3097920
chr2L	-	3098065	3099451
chr2L	-	3098065	3108723
chr2L	+	310605	317741
chr2L	-	3149279	3152427
chr2L	-	3149279	3159492
chr2L	-	3189492	3189977
chr2L	-	3189495	3189977
chr2L	-	3292298	3292458
chr2L	-	3292301	3292458
chr2L	-	3293949	3294081
chr2L	-	3293949	3294229
chr2L	-	3294118	3294229
chr2L	-	3301753	3303044
chr2L	-	3301756	3303044
chr2L	+	3320445	3320513
chr2L	+	3320445	3320516
chr2L	-	33270	33843
chr2L	-	33270	34556
chr2L	-	3337894	3338225
chr2L	-	3337894	3338242
chr2L	-	3361069	3362997
chr2L	-	3361443	3362997
chr2L	-	3365673	3367243
chr2L	-	3365676	3367243
chr2L	-	3367719	3367902
chr2L	-	3367719	3370904
chr2L	-	3367719	3372777
chr2L	-	3368194	3370904
chr2L	-	3368194	3372777
chr2L	-	3421698	3422758
chr2L	-	3421698	3426484
chr2L	-	34288	34556
chr2L	+	343729	344022
chr2L	+	343729	344037
chr2L	+	343729	344040
chr2L	+	344489	344553
chr2L	+	344489	344574
chr2L	-	34912	38533
chr2L	-	3502123	3502314
chr2L	-	3502123	3502414
chr2L	-	3502126	3502314
chr2L	-	3502126	3502414
chr2L	-	3504578	3506556
chr2L	-	3504578	3507764
chr2L	-	35071	38533
chr2L	-	35212	35744
chr2L	-	35212	38533
chr2L	+	3539391	3545072
chr2L	+	3539977	3545072
chr2L	+	3545807	3546729
chr2L	+	3545807	3547260
chr2L	-	3626216	3626335
chr2L	-	3626216	3634237
chr2L	-	3627635	3631521
chr2L	-	3627635	3631961
chr2L	-	3640517	3645854
chr2L	-	3640517	3655268
chr2L	+	3723764	3724882
chr2L	+	3723764	3725654
chr2L	+	3723764	3726677
chr2L	+	3723764	3726695
chr2L	+	3725196	3725654
chr2L	+	3725196	3726677
chr2L	+	3725196	3726695
chr2L	+	3725844	3726677
chr2L	+	3725844	3726695
chr2L	+	3725901	3726677
chr2L	+	3725901	3726695
chr2L	+	3759154	3759667
chr2L	+	3759154	3759707
chr2L	+	3759154	3760066
chr2L	+	3759154	3763647
chr2L	+	3759806	3760066
chr2L	+	3760517	3760691
chr2L	+	3760553	3760691
chr2L	+	3763151	3763647
chr2L	+	3763205	3763647
chr2L	+	3803730	3806967
chr2L	+	3806821	3806967
chr2L	-	38298	38533
chr2L	-	3879067	3879650
chr2L	-	3879067	3884034
chr2L	-	3884518	3886982
chr2L	-	3884518	3889429
chr2L	-	3884518	3893260
chr2L	-	3887556	3888647
chr2L	-	3887556	3889429
chr2L	-	3887556	3893260
chr2L	-	3887799	3893260
chr2L	-	3889784	3893260
chr2L	-	3893604	3895605
chr2L	-	3893604	3895611
chr2L	-	3893604	3902593
chr2L	-	3911336	3914726
chr2L	-	3911336	3916779
chr2L	-	3915096	3916779
chr2L	-	3915099	3916779
chr2L	-	3989800	3991546
chr2L	-	3989800	3991632
chr2L	+	4107804	4113296
chr2L	+	4107804	4113619
chr2L	+	4113344	4113619
chr2L	-	412658	412723
chr2L	-	412658	413394
chr2L	-	413654	413721
chr2L	-	413654	414441
chr2L	-	4187499	4187565
chr2L	-	4187499	4187709
chr2L	-	4190824	4191773
chr2L	-	4190824	4192631
chr2L	-	4190824	4193308
chr2L	-	4190824	4193323
chr2L	-	4192968	4193308
chr2L	-	4196779	4197145
chr2L	-	4196779	4197871
chr2L	-	4196779	4197950
chr2L	-	4196779	4197963
chr2L	-	4226767	4226845
chr2L	-	4226794	4226845
chr2L	+	4283252	4284757
chr2L	+	4284302	4284757
chr2L	+	4299177	4299261
chr2L	+	4299177	4303334
chr2L	+	4299189	4303334
chr2L	+	4304782	4305347
chr2L	+	4304782	4307189
chr2L	+	4304841	4305347
chr2L	+	4304841	4307189
chr2L	+	4305423	4307189
chr2L	+	4314615	4315767
chr2L	+	4314615	4318575
chr2L	+	4314615	4318592
chr2L	+	4318708	4318905
chr2L	+	4318708	4318946
chr2L	+	4318708	4318952
chr2L	+	4318708	4319328
chr2L	+	4318977	4319328
chr2L	+	4334104	4336448
chr2L	+	4334439	4336448
chr2L	+	4334439	4336499
chr2L	+	4336957	4341882
chr2L	+	4341804	4341882
chr2L	+	4396127	4396808
chr2L	+	4396172	4396808
chr2L	-	4455738	4455855
chr2L	-	4455738	4456112
chr2L	-	4456075	4456384
chr2L	-	4456332	4456384
chr2L	-	4456520	4456722
chr2L	-	4456520	4456724
chr2L	-	4458057	4458161
chr2L	-	4458057	4458287
chr2L	-	4485148	4485506
chr2L	-	4485148	4496245
chr2L	-	4485148	4530529
chr2L	-	4487193	4487447
chr2L	-	4487193	4515395
chr2L	-	4489113	4489666
chr2L	-	4489113	4496245
chr2L	-	4489113	4504775
chr2L	-	4489113	4515395
chr2L	-	4504671	4504775
chr2L	-	4513761	4515395
chr2L	-	4520299	4520375
chr2L	-	4520299	4526222
chr2L	-	4522964	4523029
chr2L	-	4522964	4526222
chr2L	-	4525927	4526222
chr2L	-	4530277	4530529
chr2L	-	4530713	4530830
chr2L	-	4530713	4532101
chr2L	-	4531053	4532101
chr2L	-	4531970	4532101
chr2L	-	4532386	4533569
chr2L	-	4532386	4548003
chr2L	-	4532386	4552241
chr2L	-	4548802	4552241
chr2L	-	4554659	4555204
chr2L	-	4554659	4563678
chr2L	-	4574342	4591511
chr2L	+	457562	457613
chr2L	+	457562	457626
chr2L	-	478204	479085
chr2L	-	478204	479405
chr2L	-	4846216	4847162
chr2L	-	4846216	4847237
chr2L	+	4853016	4854396
chr2L	+	4853016	4854433
chr2L	+	4872693	4873816
chr2L	+	4872693	4873870
chr2L	+	4874169	4874540
chr2L	+	4874169	4874885
chr2L	+	4874562	4874885
chr2L	-	4879196	4880292
chr2L	-	4879196	4880376
chr2L	-	4882365	4882863
chr2L	-	4882492	4882863
chr2L	-	4882492	4882887
chr2L	-	4905863	4906662
chr2L	-	4905863	4906712
chr2L	-	4911641	4911721
chr2L	-	4911671	4911721
chr2L	-	4912778	4915045
chr2L	-	4912778	4925827
chr2L	-	4912778	4931912
chr2L	+	491358	525390
chr2L	-	4926346	4928192
chr2L	-	4926346	4928226
chr2L	-	4926346	4928242
chr2L	-	4948559	4948896
chr2L	-	4948771	4948896
chr2L	+	4985424	4985731
chr2L	+	4985424	4985860
chr2L	+	4985762	4985860
chr2L	+	4987240	4987905
chr2L	+	4987318	4987905
chr2L	+	4988848	4989388
chr2L	+	4988848	4990306
chr2L	+	4989410	4990306
chr2L	+	4991262	4991559
chr2L	+	4991436	4991559
chr2L	-	4994994	4995374
chr2L	-	4994994	4997112
chr2L	-	4994994	4999223
chr2L	-	4994994	5004170
chr2L	-	4994994	5004612
chr2L	-	4994994	5008179
chr2L	-	4999385	4999669
chr2L	-	4999385	5000247
chr2L	-	5004207	5004612
chr2L	-	5004207	5008179
chr2L	+	5029636	5030135
chr2L	+	5029746	5030135
chr2L	+	5029810	5030135
chr2L	-	5042887	5042959
chr2L	-	5042887	5043076
chr2L	-	5042890	5042959
chr2L	-	5042890	5042982
chr2L	-	5042890	5043076
chr2L	-	5043016	5043076
chr2L	+	5043383	5044305
chr2L	+	5043383	5044321
chr2L	+	5043383	5045820
chr2L	+	5044689	5045820
chr2L	+	5045483	5045820
chr2L	-	5050017	5050127
chr2L	-	5050017	5050241
chr2L	-	5050017	5050656
chr2L	-	5050248	5050656
chr2L	+	5063210	5066868
chr2L	+	5064581	5066868
chr2L	+	5068394	5069125
chr2L	+	5068394	5070095
chr2L	+	5069219	5070095
chr2L	-	5074529	5075647
chr2L	-	5074529	5077075
chr2L	-	5075829	5077533
chr2L	-	5077257	5077533
chr2L	-	5079574	5092873
chr2L	-	5079574	5093443
chr2L	-	5092898	5093443
chr2L	+	5140921	5141309
chr2L	+	5140921	5141651
chr2L	+	5144785	5146991
chr2L	+	5146703	5146991
chr2L	+	5148882	5154246
chr2L	+	5152355	5154246
chr2L	+	5155849	5157872
chr2L	+	5155849	5158453
chr2L	+	5155849	5187605
chr2L	+	5155849	5188115
chr2L	+	5176814	5177137
chr2L	+	5176814	5177785
chr2L	+	5185964	5187605
chr2L	+	5187717	5188115
chr2L	+	5202302	5202763
chr2L	+	5202302	5203114
chr2L	+	5202803	5203114
chr2L	+	5203742	5204449
chr2L	+	5203742	5204461
chr2L	+	5204592	5204834
chr2L	+	5204592	5204873
chr2L	+	5204592	5205102
chr2L	+	5204903	5205102
chr2L	-	5221650	5236334
chr2L	-	5221650	5241367
chr2L	+	524059	525390
chr2L	-	5273554	5274017
chr2L	-	5273590	5274017
chr2L	-	5275780	5276286
chr2L	-	5275780	5276510
chr2L	-	5276368	5276510
chr2L	+	5306166	5307563
chr2L	+	5327286	5327501
chr2L	+	5327350	5327501
chr2L	-	5328379	5328566
chr2L	-	5328379	5328568
chr2L	-	5332850	5335662
chr2L	-	5332850	5335715
chr2L	-	542346	542428
chr2L	-	542350	542428
chr2L	-	542379	542428
chr2L	-	5540300	5540423
chr2L	-	5540300	5540970
chr2L	+	5542660	5543323
chr2L	+	5543272	5543323
chr2L	+	5548709	5549015
chr2L	+	5548709	5549442
chr2L	+	5549076	5549442
chr2L	+	5725228	5758693
chr2L	-	5736933	5740659
chr2L	-	5736938	5740659
chr2L	+	5758575	5758693
chr2L	-	5763368	5765959
chr2L	-	5764271	5765959
chr2L	-	5770885	5770949
chr2L	-	5770888	5770949
chr2L	-	5799272	5800042
chr2L	-	5799277	5800042
chr2L	-	5799411	5800042
chr2L	-	58182	58247
chr2L	-	58182	59188
chr2L	+	5851826	5852882
chr2L	+	5851826	5852991
chr2L	+	5852898	5852991
chr2L	+	5856318	5856381
chr2L	+	5856318	5856402
chr2L	-	5923479	5923530
chr2L	-	5923479	5923532
chr2L	+	5944445	5946042
chr2L	+	5945885	5946042
chr2L	+	5946250	5946314
chr2L	+	5946254	5946314
chr2L	+	5947332	5947855
chr2L	+	5947332	5948405
chr2L	+	5952627	5952987
chr2L	+	5952627	5953414
chr2L	+	5953057	5953414
chr2L	-	5973674	5973797
chr2L	-	5973674	5976609
chr2L	-	5979704	5979817
chr2L	-	5979704	5979938
chr2L	-	5979704	5979958
chr2L	-	5979704	5980207
chr2L	-	5979704	5980845
chr2L	-	5979704	5980949
chr2L	-	5979704	5980951
chr2L	+	5981835	5983008
chr2L	+	5982821	5983008
chr2L	+	5985220	5985337
chr2L	+	5985220	5985341
chr2L	+	5986892	5987614
chr2L	+	5987494	5987614
chr2L	+	6001083	6001157
chr2L	+	6001083	6001475
chr2L	+	6001269	6001667
chr2L	+	6001593	6001667
chr2L	+	6083740	6092993
chr2L	+	6092244	6092993
chr2L	+	6101798	6121772
chr2L	+	6110224	6113028
chr2L	+	6110224	6121772
chr2L	+	6113113	6121772
chr2L	+	6117183	6121772
chr2L	+	6121210	6121772
chr2L	+	6122410	6122696
chr2L	+	6122410	6122976
chr2L	+	6122853	6122976
chr2L	+	6329697	6330121
chr2L	+	6329697	6330769
chr2L	+	6330563	6330769
chr2L	+	6330886	6331042
chr2L	+	6330886	6331045
chr2L	+	6339125	6342156
chr2L	+	6341886	6342156
chr2L	+	6342060	6342156
chr2L	+	6343069	6344157
chr2L	+	6343941	6344157
chr2L	+	6457113	6457336
chr2L	+	6457113	6457364
chr2L	+	6457916	6458085
chr2L	+	6457916	6458169
chr2L	+	6458095	6458169
chr2L	-	6471714	6471959
chr2L	-	6471714	6473629
chr2L	-	6471714	6473648
chr2L	+	6492856	6494936
chr2L	+	6494874	6494936
chr2L	+	6495104	6495242
chr2L	+	6495104	6496055
chr2L	+	6495868	6496055
chr2L	-	6532952	6535827
chr2L	-	6532952	6546447
chr2L	-	6572542	6573697
chr2L	-	6572542	6574014
chr2L	-	6573805	6574014
chr2L	+	6611268	6612483
chr2L	+	6611611	6612483
chr2L	+	6611738	6612483
chr2L	-	6637024	6637432
chr2L	-	6637024	6637976
chr2L	-	6640203	6640355
chr2L	-	6640215	6640355
chr2L	-	6646947	6647919
chr2L	-	6646947	6647949
chr2L	-	6646947	6647996
chr2L	-	6646947	6649028
chr2L	-	6656130	6656194
chr2L	-	6656141	6656194
chr2L	+	6670513	6674299
chr2L	+	6674228	6674299
chr2L	-	6678224	6678910
chr2L	-	6678224	6679984
chr2L	-	6678756	6678910
chr2L	-	6678756	6679984
chr2L	-	6678933	6679984
chr2L	-	6679082	6679984
chr2L	-	6679262	6679984
chr2L	-	6680524	6680669
chr2L	-	6680524	6680945
chr2L	-	6680542	6680669
chr2L	-	6680542	6680945
chr2L	-	6680706	6680945
chr2L	-	6689118	6690975
chr2L	-	6690139	6690975
chr2L	-	6708578	6709038
chr2L	-	6708578	6709051
chr2L	-	6711742	6712336
chr2L	-	6711742	6712345
chr2L	-	6722430	6722795
chr2L	-	6722430	6723191
chr2L	+	6724084	6724825
chr2L	+	6724177	6724825
chr2L	+	6726718	6727192
chr2L	+	6726718	6727861
chr2L	+	6727322	6727861
chr2L	+	6727334	6727861
chr2L	+	6730366	6730421
chr2L	-	6768968	6769396
chr2L	-	6769127	6769396
chr2L	-	6770709	6770884
chr2L	-	6770709	6772550
chr2L	+	6777734	6777794
chr2L	+	6777734	6777797
chr2L	-	6791841	6793226
chr2L	-	6791841	6796335
chr2L	-	6793404	6793505
chr2L	-	6793404	6793817
chr2L	-	6793404	6793915
chr2L	-	6793404	6793955
chr2L	-	6793404	6794491
chr2L	-	6796835	6797753
chr2L	-	6796835	6798226
chr2L	-	6800111	6800161
chr2L	-	6800111	6800487
chr2L	+	6875537	6897092
chr2L	+	6896862	6897092
chr2L	+	6920861	6922729
chr2L	+	6920861	6922733
chr2L	+	6920861	6923782
chr2L	+	6921073	6922729
chr2L	+	6921073	6923782
chr2L	+	6921440	6922729
chr2L	+	6922826	6923782
chr2L	-	6975132	6975512
chr2L	-	6975132	6975729
chr2L	-	6975609	6975729
chr2L	-	7032177	7032309
chr2L	-	7032177	7032320
chr2L	+	7032835	7032902
chr2L	+	7032839	7032902
chr2L	+	7033018	7034197
chr2L	+	7033018	7035073
chr2L	+	7033018	7035405
chr2L	+	7034910	7035405
chr2L	+	7034912	7035405
chr2L	+	7036035	7036183
chr2L	+	7036035	7036186
chr2L	+	7038278	7040471
chr2L	+	7038366	7040471
chr2L	+	7041159	7051365
chr2L	+	7047214	7051365
chr2L	+	7049725	7051365
chr2L	+	7050983	7051365
chr2L	-	7107551	7118883
chr2L	-	7107551	7132722
chr2L	-	7107551	7155485
chr2L	-	7118923	7132722
chr2L	-	7118923	7155485
chr2L	+	7182899	7183161
chr2L	+	7182899	7183501
chr2L	+	7183322	7183776
chr2L	+	7183665	7183776
chr2L	+	7184203	7184613
chr2L	+	7184394	7184613
chr2L	-	7196857	7203933
chr2L	-	7196857	7203937
chr2L	-	7207786	7207848
chr2L	-	7207791	7207848
chr2L	+	72081	74901
chr2L	-	7223697	7225604
chr2L	-	7223697	7227102
chr2L	-	7225061	7225604
chr2L	-	7225856	7227102
chr2L	-	7231126	7231811
chr2L	-	7231126	7233679
chr2L	-	7231126	7234202
chr2L	-	7231126	7234525
chr2L	-	7231183	7234525
chr2L	-	7231980	7234525
chr2L	-	7233806	7234525
chr2L	-	7234341	7234525
chr2L	-	7234997	7236143
chr2L	-	7234997	7237685
chr2L	-	7236351	7237685
chr2L	-	7237790	7240180
chr2L	-	7237790	7244972
chr2L	-	7237790	7248827
chr2L	-	7245083	7245285
chr2L	-	7245083	7245373
chr2L	-	7245083	7248827
chr2L	+	72977	74901
chr2L	+	73692	74901
chr2L	+	7377865	7378383
chr2L	+	7377865	7378389
chr2L	+	7382175	7382756
chr2L	+	7382661	7382756
chr2L	-	738435	738502
chr2L	-	738435	738506
chr2L	-	738788	739443
chr2L	-	738837	739443
chr2L	-	740964	743336
chr2L	+	7414664	7416065
chr2L	+	7414664	7417371
chr2L	-	742416	743336
chr2L	+	7428610	7428876
chr2L	+	7428610	7428924
chr2L	+	7428679	7428876
chr2L	+	7428679	7428924
chr2L	+	7437788	7443582
chr2L	+	7440851	7443582
chr2L	+	7440958	7443582
chr2L	+	7440962	7443582
chr2L	+	74572	74901
chr2L	-	7473199	7473418
chr2L	-	7473199	7473655
chr2L	-	7473199	7473769
chr2L	-	7478783	7478849
chr2L	-	7478792	7478849
chr2L	-	7480323	7480559
chr2L	-	7480326	7480559
chr2L	-	7483627	7492183
chr2L	-	7483627	7495511
chr2L	-	7492226	7495511
chr2L	-	7501525	7529200
chr2L	-	7501525	7536273
chr2L	+	7615439	7615574
chr2L	+	7615444	7615574
chr2L	-	7644774	7644922
chr2L	-	7644786	7644922
chr2L	-	7646010	7646941
chr2L	-	7646010	7648745
chr2L	-	7647266	7648745
chr2L	-	7647509	7648745
chr2L	-	7649083	7649187
chr2L	-	7649083	7649302
chr2L	-	7649200	7649302
chr2L	-	7651743	7655052
chr2L	-	7651743	7655142
chr2L	-	7651743	7655543
chr2L	-	7651743	7661696
chr2L	-	7655221	7655543
chr2L	-	7656452	7659190
chr2L	-	7656463	7656677
chr2L	-	7656463	7657183
chr2L	-	7656463	7659190
chr2L	-	7656463	7659413
chr2L	-	7656463	7661696
chr2L	-	7657235	7659190
chr2L	-	7696206	7696592
chr2L	-	7696206	7697005
chr2L	-	7696206	7697399
chr2L	-	7696206	7697975
chr2L	-	7696206	7698372
chr2L	-	7696807	7698723
chr2L	-	7697157	7698723
chr2L	-	7697581	7698723
chr2L	-	7698130	7698723
chr2L	-	7698551	7698723
chr2L	+	7773658	7774199
chr2L	+	7773658	7774223
chr2L	-	7786424	7786699
chr2L	-	7786424	7786988
chr2L	-	7788462	7790020
chr2L	-	7788467	7790020
chr2L	-	7803043	7804569
chr2L	-	7803576	7804569
chr2L	-	7804915	7805058
chr2L	-	7804918	7805058
chr2L	+	7821308	7822921
chr2L	+	7821308	7822927
chr2L	+	7821648	7822640
chr2L	+	7821648	7822674
chr2L	+	7822056	7822640
chr2L	+	7822056	7822674
chr2L	-	7826336	7826532
chr2L	-	7826336	7826768
chr2L	+	7828153	7830460
chr2L	+	7828668	7830460
chr2L	-	7989551	7991356
chr2L	-	7991259	7991356
chr2L	+	7999167	7999247
chr2L	+	7999169	7999247
chr2L	+	7999173	7999247
chr2L	+	7999175	7999247
chr2L	+	8011883	8024515
chr2L	+	8013103	8024515
chr2L	+	8030839	8032058
chr2L	+	8031308	8032058
chr2L	+	8031575	8032058
chr2L	+	8036298	8036356
chr2L	+	8036298	8036380
chr2L	+	8036576	8036835
chr2L	+	8036576	8037088
chr2L	+	8036893	8037088
chr2L	-	8042613	8042690
chr2L	-	8042613	8042821
chr2L	+	8083521	8089183
chr2L	+	8083521	8089392
chr2L	+	8083587	8089183
chr2L	+	8083636	8089183
chr2L	+	8083636	8089392
chr2L	+	8083943	8089183
chr2L	+	8084056	8089183
chr2L	+	8084056	8089392
chr2L	+	8088370	8089183
chr2L	+	8088453	8089183
chr2L	+	8088453	8089392
chr2L	+	8088516	8089183
chr2L	+	8088516	8089392
chr2L	+	8089736	8102298
chr2L	+	8089736	8105690
chr2L	+	8103503	8105690
chr2L	+	8107880	8109814
chr2L	+	8107880	8110479
chr2L	+	8110216	8110479
chr2L	-	8135614	8135672
chr2L	-	8135617	8135672
chr2L	-	8140778	8156515
chr2L	-	8140778	8156519
chr2L	-	8140778	8157144
chr2L	-	8140778	8159217
chr2L	+	8174698	8175174
chr2L	+	8174698	8175993
chr2L	+	8174698	8176571
chr2L	+	8175397	8175993
chr2L	+	8175397	8176571
chr2L	+	8176051	8176571
chr2L	+	8182450	8183139
chr2L	+	8182450	8183187
chr2L	+	8183706	8184125
chr2L	+	8183706	8184813
chr2L	+	8183706	8186115
chr2L	+	8184393	8184813
chr2L	+	8184850	8185124
chr2L	+	8184850	8186115
chr2L	+	8185278	8186115
chr2L	-	8193229	8193670
chr2L	-	8193229	8194043
chr2L	-	8193229	8194500
chr2L	-	8193229	8195019
chr2L	-	8193707	8195019
chr2L	-	8194059	8195019
chr2L	-	8194528	8195019
chr2L	+	8213260	8213335
chr2L	+	8213282	8213335
chr2L	+	821659	822856
chr2L	-	8218679	8218852
chr2L	-	8218679	8219114
chr2L	-	8218871	8219114
chr2L	+	822031	822856
chr2L	-	8221967	8222224
chr2L	-	8222114	8222224
chr2L	-	8223344	8223823
chr2L	-	8223449	8223823
chr2L	-	8226606	8226927
chr2L	-	8226606	8227650
chr2L	-	8226606	8227668
chr2L	-	8227826	8228492
chr2L	-	8228257	8228492
chr2L	+	824137	824189
chr2L	+	824137	824217
chr2L	-	8244501	8244968
chr2L	-	8244732	8244968
chr2L	-	8245223	8245738
chr2L	-	8245223	8252226
chr2L	-	8246217	8246417
chr2L	-	8246217	8246672
chr2L	-	8246217	8246859
chr2L	-	8246217	8247058
chr2L	-	8246484	8246672
chr2L	-	8246766	8246859
chr2L	-	8246959	8247058
chr2L	-	8250681	8250861
chr2L	-	8250681	8251222
chr2L	-	8250681	8252226
chr2L	-	8250967	8251222
chr2L	-	8250967	8252226
chr2L	-	8251325	8252226
chr2L	-	8252775	8252841
chr2L	-	8252775	8257076
chr2L	-	8262680	8265193
chr2L	-	8262680	8271934
chr2L	-	8262680	8283407
chr2L	+	826507	829303
chr2L	+	826507	829455
chr2L	-	8284220	8296439
chr2L	-	8284220	8298069
chr2L	+	8304577	8304660
chr2L	+	8304577	8304842
chr2L	+	8304772	8304842
chr2L	+	8338665	8340182
chr2L	+	8338665	8340862
chr2L	+	8340310	8340862
chr2L	+	8346865	8349073
chr2L	-	835547	835702
chr2L	-	835547	836544
chr2L	-	8361198	8362037
chr2L	-	8361198	8362282
chr2L	-	836171	836544
chr2L	+	8369030	8369221
chr2L	+	8369030	8369714
chr2L	+	8369030	8369797
chr2L	-	837378	842612
chr2L	-	837378	849897
chr2L	-	8381452	8381509
chr2L	-	8381452	8381678
chr2L	+	8384895	8384995
chr2L	+	8384895	8386215
chr2L	+	8385097	8386215
chr2L	+	8386385	8386473
chr2L	+	8386385	8386482
chr2L	+	8386385	8386485
chr2L	+	8386389	8386473
chr2L	+	8415886	8426872
chr2L	+	8420064	8426872
chr2L	+	8428067	8428318
chr2L	+	8428067	8430279
chr2L	+	8429462	8430279
chr2L	+	8464774	8464831
chr2L	-	8493092	8493742
chr2L	-	8493092	8493745
chr2L	-	8506706	8506791
chr2L	-	8506706	8506800
chr2L	+	8661487	8662437
chr2L	+	8661487	8662455
chr2L	+	8663251	8664156
chr2L	+	8663251	8665444
chr2L	+	8663251	8666034
chr2L	+	8664220	8664373
chr2L	+	8664220	8665444
chr2L	+	8664220	8666034
chr2L	+	8664430	8665444
chr2L	+	8665518	8666034
chr2L	-	8688545	8688619
[truncated: 11,963 more rows]

## Sheet: Notes
AS junctions (within a gene) identified from each neuronal samples
1) Each tab represents the different neuron groups analyzed in the study
2) Each spreadsheet contains the following information for each AS junction:
	Chromosome	Chromsome that the AS junction locates at
	Strand	Strand of the AS junction
	Start coordinate of the AS junction
	End coordinate of the AS junction
