# Supplementary material for: Striking circadian neuron diversity and cycling of Drosophila alternative splicing
Source: eLife journal article supplement (doi:10.7554/elife.35618), 2018-06-04

Figure 3-figure supplement 3

A

Cross-species conservation comparison between differentially spliced cassette exons and non-differentially spliced cassette exons

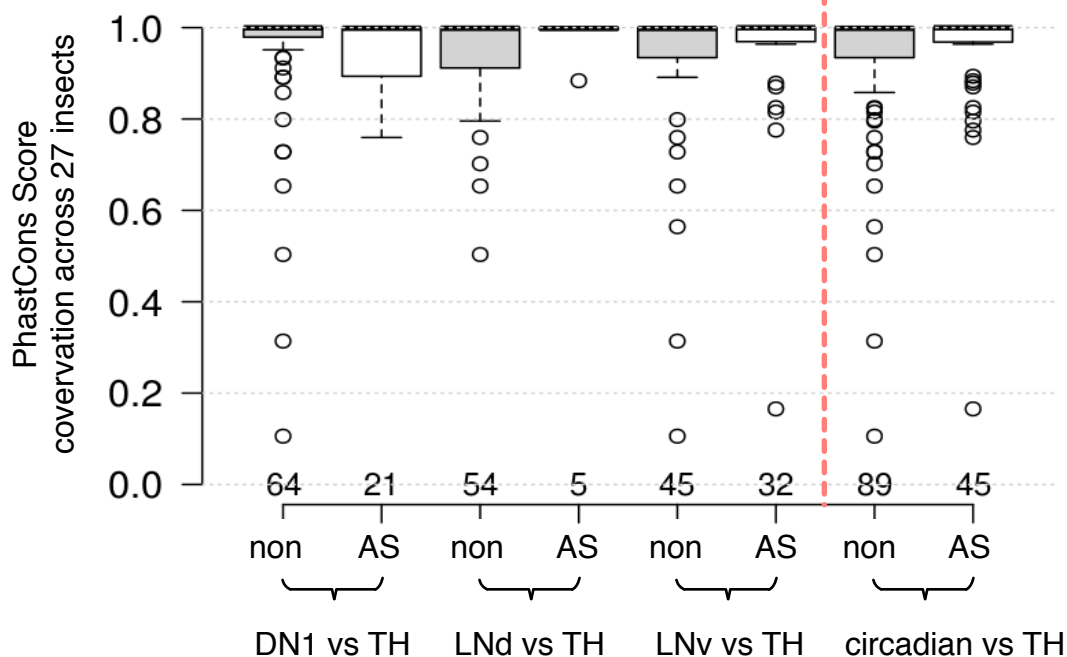

B

Reading frame preservation comparison between differentially spliced cassette exons and non-differentially spliced cassette exons

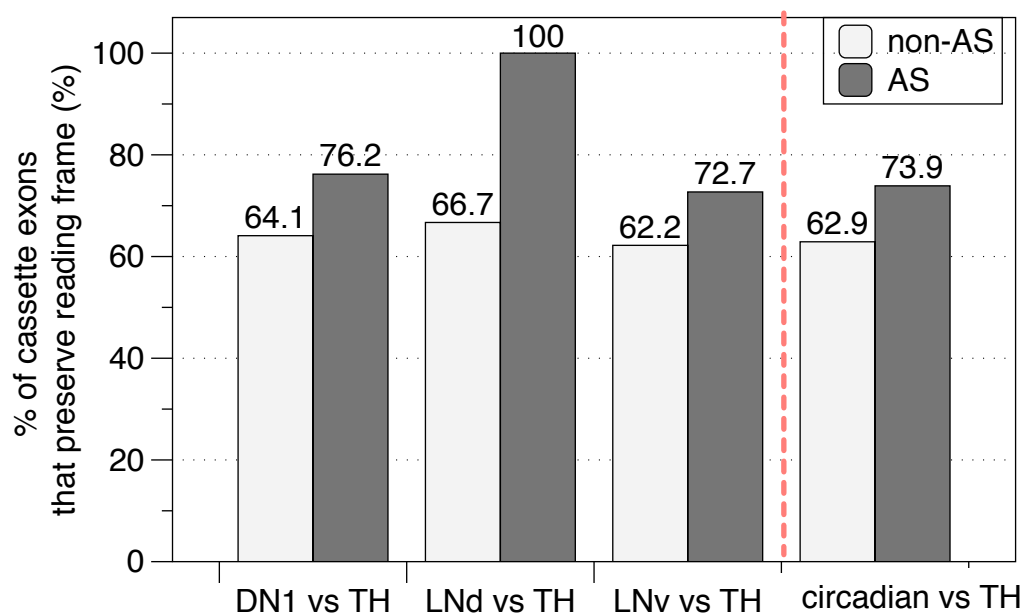

Supplement: supp [file elife-35618-supp-v1.zip › elife_poa_e35618_Figure_3_figure_supplement_3.pdf]
