# Supplementary material for: Striking circadian neuron diversity and cycling of Drosophila alternative splicing
Source: eLife journal article supplement (doi:10.7554/elife.35618), 2018-06-04
Supplement: supp [file elife-35618-supp-v1.zip › elife_poa_e35618_Figure_3_source_data_1.xlsx]

## Sheet: AS Cassette exon events
Gene	AS_event_ID	AS_structure_ID	sub_junction_ID	sub-junction_dispersion_estimate	LRT_statistic-full_vs_reduced	LRT_p_value-full_vs_reduced	BH_adjusted_p-values	DN1	TH	fitting_parameter_log2fold_change_TH_DN1	sub_junction_chr	sub_junction_start_coor	sub_junction_end_coor	sub_junction_size	sub_junction_strand	raw_count.IndexA	raw_count.IndexB	raw_count.IndexC	raw_count.IndexD	percentage_usage.IndexA	percentage_usage.IndexB	percentage_usage.IndexC	percentage_usage.IndexD	deltaPSI
CG43707	3_Junction_10779_Junction_10781*5_Junction_10776_Junction_10779	3_Junction_10779_Junction_10781	J001	0.0511493	4.34561	0.0371045	0.278684	10.169	9.13567	-0.154592	chr2L	3759154	3760066	913	+	29	45	150	116	0.5273	0.6164	0.7109	0.7945
CG43707	3_Junction_10779_Junction_10781*5_Junction_10776_Junction_10779	3_Junction_10779_Junction_10781	J002	0.05224	4.28642	0.0384179	0.283373	7.22543	8.41263	0.219473	chr2L	3759806	3760066	261	+	26	28	61	30	0.4727	0.3836	0.2891	0.2055
CG43707	3_Junction_10779_Junction_10781*5_Junction_10776_Junction_10779	5_Junction_10776_Junction_10779	J001	0.0464564	9.05169	0.00262452	0.0576624	6.26479	7.90617	0.335711	chr2L	3759154	3759667	514	+	19	32	40	19	0.3958	0.4156	0.2105	0.1407
CG43707	3_Junction_10779_Junction_10781*5_Junction_10776_Junction_10779	5_Junction_10776_Junction_10779	J002	0.0446578	9.2729	0.00232569	0.0529643	10.2853	9.00234	-0.192205	chr2L	3759154	3760066	913	+	29	45	150	116	0.6042	0.5844	0.7895	0.8593	0.240088
frj	3_Junction_12839_Junction_12841*5_Junction_12838_Junction_12839	3_Junction_12839_Junction_12841	J001	0.0602749	6.6636	0.00984018	0.131061	8.92541	10.354	0.214194	chr2L	6457916	6458169	254	+	72	158	41	46	0.7579	0.6124	0.4271	0.4381
frj	3_Junction_12839_Junction_12841*5_Junction_12838_Junction_12839	3_Junction_12839_Junction_12841	J002	0.0607941	6.62237	0.0100706	0.132797	9.67798	8.19131	-0.240611	chr2L	6458095	6458169	75	+	23	100	55	59	0.2421	0.3876	0.5729	0.5619
frj	3_Junction_12839_Junction_12841*5_Junction_12838_Junction_12839	5_Junction_12838_Junction_12839	J001	0.0533475	3.81468	0.0508054	0.325041	9.6662	8.58489	-0.171149	chr2L	6457916	6458085	170	+	30	120	49	57	0.2941	0.4317	0.5444	0.5534
frj	3_Junction_12839_Junction_12841*5_Junction_12838_Junction_12839	5_Junction_12838_Junction_12839	J002	0.0529921	3.83243	0.05027	0.323865	9.10961	10.1564	0.156931	chr2L	6457916	6458169	254	+	72	158	41	46	0.7059	0.5683	0.4556	0.4466	-0.21364
Nhe3	3_Junction_13058_Junction_13059*5_Junction_13057_Junction_13058	3_Junction_13058_Junction_13059	J001	0.0845901	7.98795	0.00470897	0.0846853	7.46838	9.28417	0.313977	chr2L	6680542	6680945	404	-	48	137	23	23	0.6154	0.4228	0.213	0.2255
Nhe3	3_Junction_13058_Junction_13059*5_Junction_13057_Junction_13058	3_Junction_13058_Junction_13059	J002	0.0840872	8.02466	0.00461448	0.0834971	10.9848	9.26783	-0.245207	chr2L	6680706	6680945	240	-	30	187	85	79	0.3846	0.5772	0.787	0.7745
Nhe3	3_Junction_13058_Junction_13059*5_Junction_13057_Junction_13058	5_Junction_13057_Junction_13058	J001	0.11995	4.20687	0.0402605	0.290913	10.5994	9.18418	-0.206761	chr2L	6680542	6680669	128	-	26	212	78	57	0.3514	0.6074	0.7723	0.7125
Nhe3	3_Junction_13058_Junction_13059*5_Junction_13057_Junction_13058	5_Junction_13057_Junction_13058	J002	0.120418	4.19386	0.0405707	0.291878	7.6478	9.09749	0.250423	chr2L	6680542	6680945	404	-	48	137	23	23	0.6486	0.3926	0.2277	0.2875	-0.224413
Trpm	3_Junction_17233_Junction_17235*5_Junction_17232_Junction_17233	3_Junction_17233_Junction_17235	J001	0.0772759	25.1384	5.33601e-07	8.68996e-05	4.1725	7.5359	0.852866	chr2R	11172471	11180276	7806	-	10	18	24	11	0.7143	0.8571	0.2124	0.1341
Trpm	3_Junction_17233_Junction_17235*5_Junction_17232_Junction_17233	3_Junction_17233_Junction_17235	J002	0.0724488	25.9713	3.46524e-07	5.8651e-05	7.59081	4.39315	-0.788999	chr2R	11174915	11180276	5362	-	4	3	89	71	0.2857	0.1429	0.7876	0.8659
Trpm	3_Junction_17233_Junction_17235*5_Junction_17232_Junction_17233	5_Junction_17232_Junction_17233	J001	0.065296	16.5139	4.82945e-05	0.00329951	8.69319	6.59235	-0.399094	chr2R	11172471	11174857	2387	-	10	12	110	94	0.5	0.4	0.8209	0.8952
Trpm	3_Junction_17233_Junction_17235*5_Junction_17232_Junction_17233	5_Junction_17232_Junction_17233	J002	0.0701785	15.8659	6.79923e-05	0.00413677	4.48718	7.09515	0.661025	chr2R	11172471	11180276	7806	-	10	18	24	11	0.5	0.6	0.1791	0.1048	-0.395999
unc-104	3_Junction_18692_Junction_18693*5_Junction_18691_Junction_18692	3_Junction_18692_Junction_18693	J001	0.0911805	5.95947	0.0146384	0.165463	11.861	10.4028	-0.189251	chr2R	12641657	12643390	1734	-	23	179	178	188	0.561	0.6938	0.8018	0.8952
unc-104	3_Junction_18692_Junction_18693*5_Junction_18691_Junction_18692	3_Junction_18692_Junction_18693	J002	0.0930513	5.87003	0.0154008	0.170871	7.05093	8.6541	0.295571	chr2R	12641774	12643390	1617	-	18	79	44	22	0.439	0.3062	0.1982	0.1048
unc-104	3_Junction_18692_Junction_18693*5_Junction_18691_Junction_18692	5_Junction_18691_Junction_18692	J001	0.0628805	4.07326	0.0435672	0.30138	7.72082	8.8881	0.203121	chr2R	12641657	12641746	90	-	19	78	53	38	0.4524	0.3035	0.2294	0.1681
unc-104	3_Junction_18692_Junction_18693*5_Junction_18691_Junction_18692	5_Junction_18691_Junction_18692	J002	0.0616135	4.12857	0.042165	0.297409	11.6576	10.6348	-0.132472	chr2R	12641657	12643390	1734	-	23	179	178	188	0.5476	0.6965	0.7706	0.8319	0.244633
CG9646	3_Junction_19091_Junction_19094*5_Junction_19090_Junction_19091	3_Junction_19091_Junction_19094	J001	0.0198452	4.71426	0.0299134	0.247249	14.3494	14.9621	0.0603186	chr2R	12938669	12940772	2104	+	67	689	647	443	0.7128	0.6587	0.5675	0.5551
CG9646	3_Junction_19091_Junction_19094*5_Junction_19090_Junction_19091	3_Junction_19091_Junction_19094	J002	0.0199035	4.70437	0.030086	0.247878	13.5979	12.9466	-0.0708133	chr2R	12940649	12940772	124	+	27	357	493	355	0.2872	0.3413	0.4325	0.4449
CG9646	3_Junction_19091_Junction_19094*5_Junction_19090_Junction_19091	5_Junction_19090_Junction_19091	J001	0.0322503	0.456418	0.499303	0.825528	9.90468	9.69931	-0.0302289	chr2R	12938669	12939325	657	+	12	115	116	108	0.1519	0.143	0.152	0.196
CG9646	3_Junction_19091_Junction_19094*5_Junction_19090_Junction_19091	5_Junction_19090_Junction_19091	J002	0.0317047	0.462948	0.496249	0.82396	14.5502	14.7129	0.0160402	chr2R	12938669	12940772	2104	+	67	689	647	443	0.8481	0.857	0.848	0.804	-0.11072
CG5174	3_Junction_20201_Junction_20203*5_Junction_20199_Junction_20201	3_Junction_20201_Junction_20203	J001	0.162187	3.80454	0.051114	0.325877	5.44254	7.30958	0.425506	chr2R	14309058	14311630	2573	+	20	17	16	20	0.4878	0.1848	0.1135	0.1156
CG5174	3_Junction_20201_Junction_20203*5_Junction_20199_Junction_20201	3_Junction_20201_Junction_20203	J002	0.157244	3.90068	0.0482665	0.318593	10.7779	9.00546	-0.2592	chr2R	14311376	14311630	255	+	21	75	125	153	0.5122	0.8152	0.8865	0.8844
CG5174	3_Junction_20201_Junction_20203*5_Junction_20199_Junction_20201	5_Junction_20199_Junction_20201	J001	0.347777	0.883102	0.347353	0.729937	11.0468	9.7343	-0.182479	chr2R	14309058	14311372	2315	+	18	158	109	151	0.4737	0.9029	0.872	0.883
CG5174	3_Junction_20201_Junction_20203*5_Junction_20199_Junction_20201	5_Junction_20199_Junction_20201	J002	0.355036	0.867122	0.351753	0.732965	5.79089	7.02683	0.279087	chr2R	14309058	14311630	2573	+	20	17	16	20	0.5263	0.0971	0.128	0.117	-0.140627
CG10737	3_Junction_20848_Junction_20851*5_Junction_20846_Junction_20848	3_Junction_20848_Junction_20851	J001	0.187014	4.66157	0.0308449	0.251461	14.6473	12.8941	-0.183924	chr2R	15064248	15065322	1075	+	96	200	574	533	0.8889	0.7843	0.9243	0.978
CG10737	3_Junction_20848_Junction_20851*5_Junction_20846_Junction_20848	3_Junction_20848_Junction_20851	J002	0.191731	4.55848	0.032756	0.260837	6.31368	8.08629	0.356996	chr2R	15065078	15065322	245	+	12	55	47	12	0.1111	0.2157	0.0757	0.022
CG10737	3_Junction_20848_Junction_20851*5_Junction_20846_Junction_20848	5_Junction_20846_Junction_20848	J001	0.0356722	34.8254	3.60636e-09	1.36079e-06	7.83668	10.7127	0.451004	chr2R	15064248	15064444	197	+	41	131	49	48	0.2993	0.3958	0.0787	0.0826
CG10737	3_Junction_20848_Junction_20851*5_Junction_20846_Junction_20848	5_Junction_20846_Junction_20848	J002	0.0349705	35.385	2.70563e-09	1.04981e-06	14.8776	12.6073	-0.23888	chr2R	15064248	15065322	1075	+	96	200	574	533	0.7007	0.6042	0.9213	0.9174	0.296553
CG5946	3_Junction_37457_Junction_37459*5_Junction_37455_Junction_37457	3_Junction_37457_Junction_37459	J001	0.0527428	13.1581	0.000286282	0.0124335	15.5603	13.5359	-0.201086	chr3L	11810416	11811186	771	-	61	425	735	758	0.7011	0.5563	0.8429	0.8653
CG5946	3_Junction_37457_Junction_37459*5_Junction_37455_Junction_37457	3_Junction_37457_Junction_37459	J002	0.0531488	13.0631	0.000301174	0.0129843	10.2834	12.4487	0.275674	chr3L	11810752	11811186	435	-	26	339	137	118	0.2989	0.4437	0.1571	0.1347
CG5946	3_Junction_37457_Junction_37459*5_Junction_37455_Junction_37457	5_Junction_37455_Junction_37457	J001	0.0220819	62.991	2.0765e-15	2.75497e-12	13.1975	16.0009	0.277884	chr3L	11810416	11810487	72	-	131	1188	309	287	0.6823	0.7365	0.296	0.2746
CG5946	3_Junction_37457_Junction_37459*5_Junction_37455_Junction_37457	5_Junction_37455_Junction_37457	J002	0.0220721	63.0159	2.05049e-15	2.75497e-12	15.9848	13.1811	-0.278228	chr3L	11810416	11811186	771	-	61	425	735	758	0.3177	0.2635	0.704	0.7254	0.388287
Pten	3_Junction_413_Junction_415*5_Junction_412_Junction_413	3_Junction_413_Junction_415	J001	0.110104	2.52903	0.111769	0.462711	8.64219	9.88111	0.193277	chr2L	10256506	10257393	888	-	62	118	45	37	0.7126	0.5086	0.3409	0.4805
Pten	3_Junction_413_Junction_415*5_Junction_412_Junction_413	3_Junction_413_Junction_415	J002	0.110374	2.52393	0.112131	0.463403	9.81401	8.57105	-0.195372	chr2L	10257122	10257393	272	-	25	114	87	40	0.2874	0.4914	0.6591	0.5195
Pten	3_Junction_413_Junction_415*5_Junction_412_Junction_413	5_Junction_412_Junction_413	J001	0.0231906	22.6781	1.9154e-06	0.00023516	11.2649	9.51125	-0.244127	chr2L	10256506	10256908	403	-	47	97	142	101	0.4312	0.4512	0.7594	0.7319
Pten	3_Junction_413_Junction_415*5_Junction_412_Junction_413	5_Junction_412_Junction_413	J002	0.0233473	22.5822	2.01342e-06	0.000244277	8.21483	10.213	0.314108	chr2L	10256506	10257393	888	-	62	118	45	37	0.5688	0.5488	0.2406	0.2681	-0.224625
CG42674	3_Junction_43821_Junction_43827*5_Junction_43817_Junction_43821	3_Junction_43821_Junction_43827	J001	0.0865173	6.59741	0.0102127	0.13377	6.8297	8.41226	0.300671	chr3L	20162163	20178061	15899	-	25	126	18	18	0.6757	0.8344	0.5294	0.4286
CG42674	3_Junction_43821_Junction_43827*5_Junction_43817_Junction_43821	3_Junction_43821_Junction_43827	J002	0.0894998	6.43026	0.0112192	0.141079	7.11529	5.35325	-0.410509	chr3L	20175769	20178061	2293	-	12	25	16	24	0.3243	0.1656	0.4706	0.5714
CG42674	3_Junction_43821_Junction_43827*5_Junction_43817_Junction_43821	5_Junction_43817_Junction_43821	J001	0.0344863	4.45321	0.0348357	0.26918	8.26361	7.2539	-0.188015	chr3L	20162163	20175724	13562	-	19	86	32	24	0.4318	0.4057	0.64	0.5714
CG42674	3_Junction_43821_Junction_43827*5_Junction_43817_Junction_43821	5_Junction_43817_Junction_43821	J002	0.0342668	4.46915	0.0345121	0.267719	7.12237	8.14488	0.193535	chr3L	20162163	20178061	15899	-	25	126	18	18	0.5682	0.5943	0.36	0.4286	-0.21631
Csp	3_Junction_45696_Junction_45697*5_Junction_45695_Junction_45696	3_Junction_45696_Junction_45697	J001	0.0371192	8.70038	0.00318143	0.06549	9.84615	10.963	0.155014	chr3L	22263020	22264656	1637	+	59	185	86	69	0.8429	0.8981	0.7227	0.697
Csp	3_Junction_45696_Junction_45697*5_Junction_45695_Junction_45696	3_Junction_45696_Junction_45697	J002	0.0394251	8.37643	0.00380118	0.0735021	7.40818	5.70504	-0.376884	chr3L	22264076	22264656	581	+	11	21	33	30	0.1571	0.1019	0.2773	0.303
Csp	3_Junction_45696_Junction_45697*5_Junction_45695_Junction_45696	5_Junction_45695_Junction_45696	J001	0.0401002	1.8417	0.174752	0.558182	7.90993	7.16699	-0.142298	chr3L	22263020	22264012	993	+	13	58	44	26	0.1806	0.2387	0.3385	0.2737
Csp	3_Junction_45696_Junction_45697*5_Junction_45695_Junction_45696	5_Junction_45695_Junction_45696	J002	0.038591	1.88373	0.169911	0.551855	10.118	10.6863	0.0788329	chr3L	22263020	22264656	1637	+	59	185	86	69	0.8194	0.7613	0.6615	0.7263	-0.165997
CLIP-190	3_Junction_6019_Junction_6020*5_Junction_6018_Junction_6019	3_Junction_6019_Junction_6020	J001	0.0480338	32.1254	1.44537e-08	4.68084e-06	2.63879	7.0528	1.41832	chr2L	17401581	17404059	2479	+	49	26	2	1	0.4118	0.3467	0.029	0.0217
CLIP-190	3_Junction_6019_Junction_6020*5_Junction_6018_Junction_6019	3_Junction_6019_Junction_6020	J002	0.0463819	32.6134	1.12437e-08	3.7597e-06	10.5688	8.22504	-0.36172	chr2L	17402485	17404059	1575	+	70	49	67	45	0.5882	0.6533	0.971	0.9783
CLIP-190	3_Junction_6019_Junction_6020*5_Junction_6018_Junction_6019	5_Junction_6018_Junction_6019	J001	0.101222	21.3706	3.78523e-06	0.000416264	13.1214	10.0486	-0.384926	chr2L	17401581	17402373	793	+	125	146	138	100	0.7184	0.8488	0.9857	0.9901
CLIP-190	3_Junction_6019_Junction_6020*5_Junction_6018_Junction_6019	5_Junction_6018_Junction_6019	J002	0.104288	20.9934	4.60877e-06	0.000486036	2.7797	6.95521	1.32317	chr2L	17401581	17404059	2479	+	49	26	2	1	0.2816	0.1512	0.0143	0.0099	-0.150978
CG42613	3_Junction_60249_Junction_60250*5_Junction_60247_Junction_60249	3_Junction_60249_Junction_60250	J001	0.0402716	10.3677	0.00128239	0.0353507	12.6369	11.2979	-0.161585	chr3R	14800892	14801178	287	+	121	180	174	131	0.605	0.5341	0.8208	0.7529
CG42613	3_Junction_60249_Junction_60250*5_Junction_60247_Junction_60249	3_Junction_60249_Junction_60250	J002	0.0406023	10.3004	0.00133005	0.0359993	8.84131	10.359	0.228553	chr3R	14801003	14801178	176	+	79	157	38	43	0.395	0.4659	0.1792	0.2471
CG42613	3_Junction_60249_Junction_60250*5_Junction_60247_Junction_60249	5_Junction_60247_Junction_60249	J001	0.0596804	2.45535	0.117125	0.472576	9.53153	10.5471	0.146061	chr3R	14800892	14800963	72	+	101	93	51	59	0.455	0.3407	0.2267	0.3105
CG42613	3_Junction_60249_Junction_60250*5_Junction_60247_Junction_60249	5_Junction_60247_Junction_60249	J002	0.0593593	2.46665	0.116286	0.470585	12.4585	11.5026	-0.115166	chr3R	14800892	14801178	287	+	121	180	174	131	0.545	0.6593	0.7733	0.6895	0.201615
CG2082	3_Junction_61088_Junction_61094*5_Junction_61086_Junction_61088	3_Junction_61088_Junction_61094	J001	0.0519211	12.2538	0.000464319	0.0174721	9.30991	7.24204	-0.362371	chr3R	1586683	1587366	684	-	11	54	74	59	0.2037	0.1049	0.3627	0.3806
CG2082	3_Junction_61088_Junction_61094*5_Junction_61086_Junction_61088	3_Junction_61088_Junction_61094	J002	0.0505668	12.537	0.000398981	0.0157924	10.8144	12.529	0.212315	chr3R	1587168	1587366	199	-	43	461	130	96	0.7963	0.8951	0.6373	0.6194
CG2082	3_Junction_61088_Junction_61094*5_Junction_61086_Junction_61088	5_Junction_61086_Junction_61088	J001	0.036888	14.5279	0.000138096	0.00712145	11.2408	12.761	0.182997	chr3R	1586683	1587158	476	-	51	474	149	115	0.8226	0.8977	0.6682	0.6609
CG2082	3_Junction_61088_Junction_61094*5_Junction_61086_Junction_61088	5_Junction_61086_Junction_61088	J002	0.0381967	14.1247	0.000171083	0.00844717	9.28156	7.28653	-0.349135	chr3R	1586683	1587366	684	-	11	54	74	59	0.1774	0.1023	0.3318	0.3391	0.134394
CG42322	3_Junction_61639_Junction_61645*5_Junction_61638_Junction_61639	3_Junction_61639_Junction_61645	J001	0.123745	1.04223	0.307302	0.700306	14.7599	14.1977	-0.0560242	chr3R	16576076	16578066	1991	+	63	422	832	621	0.8514	0.9114	0.8985	0.9583
CG42322	3_Junction_61639_Junction_61645*5_Junction_61638_Junction_61639	3_Junction_61639_Junction_61645	J002	0.126323	1.02765	0.310711	0.70292	7.53721	8.1376	0.110572	chr3R	16576479	16578066	1588	+	11	41	94	27	0.1486	0.0886	0.1015	0.0417
CG42322	3_Junction_61639_Junction_61645*5_Junction_61638_Junction_61639	5_Junction_61638_Junction_61639	J001	0.0552398	9.2202	0.0023936	0.0541211	10.2589	11.8214	0.204522	chr3R	16576076	16576408	333	+	42	190	189	88	0.4	0.3105	0.1851	0.1241
CG42322	3_Junction_61639_Junction_61645*5_Junction_61638_Junction_61639	5_Junction_61638_Junction_61639	J002	0.0548225	9.27916	0.00231775	0.0528712	15.2216	13.7696	-0.144642	chr3R	16576076	16578066	1991	+	63	422	832	621	0.6	0.6895	0.8149	0.8759	0.200293
alph	3_Junction_70422_Junction_70424*5_Junction_70420_Junction_70422	3_Junction_70422_Junction_70424	J001	0.0294254	5.12425	0.0235937	0.216315	9.93733	10.8708	0.129531	chr3R	25423195	25423884	690	+	29	152	141	88	0.5577	0.517	0.3994	0.3398
alph	3_Junction_70422_Junction_70424*5_Junction_70420_Junction_70422	3_Junction_70422_Junction_70424	J002	0.0292862	5.14088	0.0233688	0.21526	11.443	10.5507	-0.11712	chr3R	25423630	25423884	255	+	23	142	212	171	0.4423	0.483	0.6006	0.6602
alph	3_Junction_70422_Junction_70424*5_Junction_70420_Junction_70422	5_Junction_70420_Junction_70422	J001	0.0278791	2.49237	0.114399	0.466454	9.24197	8.54277	-0.113497	chr3R	25423195	25423496	302	+	16	64	98	70	0.3556	0.2963	0.41	0.443
alph	3_Junction_70422_Junction_70424*5_Junction_70420_Junction_70422	5_Junction_70420_Junction_70422	J002	0.0275209	2.51615	0.112686	0.464223	10.1058	10.7048	0.0830827	chr3R	25423195	25423884	690	+	29	152	141	88	0.6444	0.7037	0.59	0.557	-0.135468
B52	3_Junction_78432_Junction_78440*5_Junction_78429_Junction_78432	3_Junction_78432_Junction_78440	J001	0.0239107	6.33597	0.0118313	0.145344	12.0009	11.0155	-0.123611	chr3R	9488773	9491173	2401	+	70	233	156	115	0.2439	0.2735	0.4205	0.3674
B52	3_Junction_78432_Junction_78440*5_Junction_78429_Junction_78432	3_Junction_78432_Junction_78440	J002	0.0237317	6.37378	0.0115819	0.143393	13.2733	14.1464	0.0919126	chr3R	9490656	9491173	518	+	217	619	215	198	0.7561	0.7265	0.5795	0.6326
B52	3_Junction_78432_Junction_78440*5_Junction_78429_Junction_78432	5_Junction_78429_Junction_78432	J001	0.0725387	4.31233	0.0378372	0.280888	9.91262	11.211	0.17757	chr3R	9488773	9489175	403	+	102	191	56	68	0.593	0.4505	0.2642	0.3716
B52	3_Junction_78432_Junction_78440*5_Junction_78429_Junction_78432	5_Junction_78429_Junction_78432	J002	0.072431	4.31784	0.0377147	0.280445	12.1447	10.8735	-0.159513	chr3R	9488773	9491173	2401	+	70	233	156	115	0.407	0.5495	0.7358	0.6284	0.131917
Caps	3_Junction_79925_Junction_79929*5_Junction_79924_Junction_79925	3_Junction_79925_Junction_79929	J001	0.0638125	0.182243	0.669452	0.900049	8.52692	8.78594	0.0431719	chr4	1254609	1259566	4958	+	30	165	28	34	0.4688	0.6022	0.4444	0.5574
Caps	3_Junction_79925_Junction_79929*5_Junction_79924_Junction_79925	3_Junction_79925_Junction_79929	J002	0.0640422	0.181547	0.670047	0.900218	8.49908	8.23519	-0.0455059	chr4	1257938	1259566	1629	+	34	109	35	27	0.5312	0.3978	0.5556	0.4426
Caps	3_Junction_79925_Junction_79929*5_Junction_79924_Junction_79925	5_Junction_79924_Junction_79925	J001	0.0638073	5.99603	0.0143381	0.163809	8.23564	6.69712	-0.29834	chr4	1254609	1257730	3122	+	16	47	24	44	0.3478	0.2217	0.4615	0.5641
Caps	3_Junction_79925_Junction_79929*5_Junction_79924_Junction_79925	5_Junction_79924_Junction_79925	J002	0.0625693	6.09026	0.0135929	0.158965	7.96421	9.36828	0.234253	chr4	1254609	1259566	4958	+	30	165	28	34	0.6522	0.7783	0.5385	0.4359	-0.121685
CaMKI	3_Junction_81411_Junction_81418*5_Junction_81408_Junction_81411	3_Junction_81411_Junction_81418	J001	0.0543283	9.80975	0.00173589	0.043428	13.816	12.3203	-0.165296	chr4	467861	470866	3006	+	36	342	411	343	0.3636	0.5237	0.7111	0.7206
CaMKI	3_Junction_81411_Junction_81418*5_Junction_81408_Junction_81411	3_Junction_81411_Junction_81418	J002	0.0545054	9.78338	0.00176097	0.0438684	11.0757	12.6141	0.187646	chr4	470594	470866	273	+	63	311	167	133	0.6364	0.4763	0.2889	0.2794
CaMKI	3_Junction_81411_Junction_81418*5_Junction_81408_Junction_81411	5_Junction_81408_Junction_81411	J001	0.0319912	9.66401	0.00187913	0.0460039	10.1182	11.6613	0.204774	chr4	467861	470548	2688	+	19	285	117	100	0.3455	0.4545	0.2216	0.2257
CaMKI	3_Junction_81411_Junction_81418*5_Junction_81408_Junction_81411	5_Junction_81408_Junction_81411	J002	0.0316095	9.76905	0.00177474	0.044158	13.7861	12.4061	-0.152165	chr4	467861	470866	3006	+	36	342	411	343	0.6545	0.5455	0.7784	0.7743	0.258581
sun	3_Junction_91749_Junction_91751*5_Junction_91748_Junction_91749	3_Junction_91749_Junction_91751	J001	0.309145	0.731529	0.392388	0.762608	21.0889	19.9243	-0.0819527	chrX	15742037	15742917	881	-	1803	2467	2848	2742	0.9788	0.8575	0.9687	0.9737
sun	3_Junction_91749_Junction_91751*5_Junction_91748_Junction_91749	3_Junction_91749_Junction_91751	J002	0.310529	0.72817	0.393477	0.763551	10.4466	11.5871	0.14949	chrX	15742380	15742917	538	-	39	410	92	74	0.0212	0.1425	0.0313	0.0263
sun	3_Junction_91749_Junction_91751*5_Junction_91748_Junction_91749	5_Junction_91748_Junction_91749	J001	0.0471957	13.9603	0.000186711	0.00902034	10.8838	12.6601	0.218106	chrX	15742037	15742329	293	-	163	305	112	69	0.0829	0.11	0.0378	0.0245
sun	3_Junction_91749_Junction_91751*5_Junction_91748_Junction_91749	5_Junction_91748_Junction_91749	J002	0.0468947	14.0427	0.000178703	0.00874986	21.3084	19.6985	-0.113334	chrX	15742037	15742917	881	-	1803	2467	2848	2742	0.9171	0.89	0.9622	0.9755	0.104521

## Sheet: AS A5SS events
Gene	AS_event_ID	AS_structure_ID	sub_junction_ID	sub-junction_dispersion_estimate	LRT_statistic-full_vs_reduced	LRT_p_value-full_vs_reduced	BH_adjusted_p-values	DN1	TH	fitting_parameter_log2fold_change_TH_DN1	sub_junction_chr	sub_junction_start_coor	sub_junction_end_coor	sub_junction_size	sub_junction_strand	raw_count.IndexA	raw_count.IndexB	raw_count.IndexC	raw_count.IndexD	percentage_usage.IndexA	percentage_usage.IndexB	percentage_usage.IndexC	percentage_usage.IndexD	deltaPSI
RpL35	3_Junction_105850_Junction_105851	3_Junction_105850_Junction_105851	J001	0.0765049	14.5269	0.000138173	0.00712145	15.7247	13.1053	-0.262884	chrX	5566555	5567029	475	+	238	127	536	440	0.0327	0.0507	0.2115	0.1272	-0.12765
RpL35	3_Junction_105850_Junction_105851	3_Junction_105850_Junction_105851	J002	0.0763217	14.561	0.000135692	0.00703597	20.7971	23.3648	0.167953	chrX	5566908	5567029	122	+	7051	2377	1998	3018	0.9673	0.9493	0.7885	0.8728	0.12765
Act5C	3_Junction_106089_Junction_106090	3_Junction_106089_Junction_106090	J001	0.0230874	4.26426	0.0389223	0.285659	12.7319	12.013	-0.0838569	chrX	5795046	5796721	1676	+	94	229	201	222	0.5081	0.4429	0.6018	0.5904	-0.1206
Act5C	3_Junction_106089_Junction_106090	3_Junction_106089_Junction_106090	J002	0.0231203	4.25919	0.0390385	0.286155	11.5853	12.3233	0.0890966	chrX	5796129	5796721	593	+	91	288	133	154	0.4919	0.5571	0.3982	0.4096	0.1206
CG6329	3_Junction_34941_Junction_34943_Junction_34944	3_Junction_34941_Junction_34943_Junction_34944	J001	0.072944	0.432514	0.510758	0.829982	11.2772	11.9542	0.0841152	chr2R	9713986	9717143	3158	+	21	345	144	167	0.4468	0.6074	0.4174	0.5353	0.05075
CG6329	3_Junction_34941_Junction_34943_Junction_34944	3_Junction_34941_Junction_34943_Junction_34944	J002	0.0417666	5.41429	0.0199726	0.197228	10.323	8.9043	-0.21329	chr2R	9714022	9717143	3122	+	11	99	132	95	0.234	0.1743	0.3826	0.3045	-0.1394
CG6329	3_Junction_34941_Junction_34943_Junction_34944	3_Junction_34941_Junction_34943_Junction_34944	J003	0.0432619	1.47824	0.224051	0.616469	8.51798	9.54327	0.163972	chr2R	9714090	9717143	3054	+	15	124	69	50	0.3191	0.2183	0.2	0.1603	0.08855
CG8067	3_Junction_35155_Junction_35156	3_Junction_35155_Junction_35156	J001	0.045723	4.94935	0.0261005	0.228571	9.30224	8.61235	-0.111172	chr2R	9871645	9871701	57	+	58	80	32	49	0.8286	0.8247	0.9697	0.9245	-0.12045
CG8067	3_Junction_35155_Junction_35156	3_Junction_35155_Junction_35156	J002	0.0530697	4.71746	0.0298578	0.247114	3.14731	4.66346	0.567283	chr2R	9871649	9871701	53	+	12	17	1	4	0.1714	0.1753	0.0303	0.0755	0.12045
Ca-alpha1D	3_Junction_5194_Junction_5196_Junction_5199	3_Junction_5194_Junction_5196_Junction_5199	J001	0.0786751	1.62812	0.201963	0.591661	6.99051	7.93468	0.182773	chr2L	16185626	16189023	3398	+	10	88	40	14	0.2778	0.2691	0.2312	0.1157	0.1
Ca-alpha1D	3_Junction_5194_Junction_5196_Junction_5199	3_Junction_5194_Junction_5196_Junction_5199	J002	0.0334926	1.85099	0.173668	0.556709	8.08718	8.84087	0.128553	chr2L	16186151	16189023	2873	+	15	117	44	37	0.4167	0.3578	0.2543	0.3058	0.1072
Ca-alpha1D	3_Junction_5194_Junction_5196_Junction_5199	3_Junction_5194_Junction_5196_Junction_5199	J003	0.0344479	5.86005	0.0154884	0.171611	9.94437	8.77462	-0.180542	chr2L	16187840	16189023	1184	+	11	122	89	70	0.3056	0.3731	0.5145	0.5785	-0.20715
Sap47	3_Junction_56971_Junction_56973	3_Junction_56971_Junction_56973	J001	0.021425	21.5981	3.36187e-06	0.000375735	15.166	13.4138	-0.177117	chr3R	11777563	11779878	2316	+	14	624	625	483	0.3182	0.2478	0.5261	0.5216	-0.24085
Sap47	3_Junction_56971_Junction_56973	3_Junction_56971_Junction_56973	J002	0.0213732	21.6463	3.27843e-06	0.000367408	14.8749	16.5523	0.154152	chr3R	11777572	11779878	2307	+	30	1894	563	443	0.6818	0.7522	0.4739	0.4784	0.24085
Xrp1	3_Junction_60153_Junction_60157	3_Junction_60153_Junction_60157	J001	0.0250401	15.3765	8.80751e-05	0.00507344	10.1671	8.06877	-0.333485	chr3R	14741647	14745143	3497	+	26	28	107	139	0.1294	0.1451	0.2989	0.3407	-0.18255
Xrp1	3_Junction_60153_Junction_60157	3_Junction_60153_Junction_60157	J002	0.0246134	15.5552	8.01327e-05	0.00469902	12.3409	13.8697	0.168491	chr3R	14744347	14745143	797	+	175	165	251	269	0.8706	0.8549	0.7011	0.6593	0.18255
scrib	3_Junction_67596_Junction_67603	3_Junction_67596_Junction_67603	J001	0.209999	7.65092	0.00567434	0.0941047	6.45379	3.07397	-1.07004	chr3R	22362119	22363091	973	+	3	6	18	18	0.017	0.1111	0.3158	0.2727	-0.2302
scrib	3_Junction_67596_Junction_67603	3_Junction_67596_Junction_67603	J002	0.19427	8.14177	0.00432571	0.0801044	8.75331	11.8793	0.440545	chr3R	22362323	22363091	769	+	173	48	39	48	0.983	0.8889	0.6842	0.7273	0.2302
sick	3_Junction_7732_Junction_7734	3_Junction_7732_Junction_7734	J001	0.0544588	14.5752	0.000134675	0.00699376	7.09505	4.69194	-0.596629	chr2L	19910432	19925381	14950	+	3	7	65	50	0.1765	0.35	0.7471	0.6944	-0.4575
sick	3_Junction_7732_Junction_7734	3_Junction_7732_Junction_7734	J002	0.056116	14.3864	0.000148875	0.00757807	4.90621	7.27664	0.568665	chr2L	19918585	19925381	6797	+	14	13	22	22	0.8235	0.65	0.2529	0.3056	0.4575
toy	3_Junction_79348_Junction_79349	3_Junction_79348_Junction_79349	J001	0.0324842	4.5269	0.033366	0.263178	11.7279	12.61	0.10463	chr4	1019319	1024782	5464	+	45	380	225	135	0.5844	0.626	0.4989	0.418	0.14675
toy	3_Junction_79348_Junction_79349	3_Junction_79348_Junction_79349	J002	0.0325235	4.52227	0.0334564	0.263557	12.1681	11.2669	-0.111015	chr4	1019331	1024782	5452	+	32	227	226	188	0.4156	0.374	0.5011	0.582	-0.14675
spir	3_Junction_7945_Junction_7946	3_Junction_7945_Junction_7946	J001	0.194888	4.35393	0.0369236	0.278133	7.15725	9.02842	0.335069	chr2L	20340112	20343597	3486	+	24	71	29	43	0.7059	0.4581	0.1526	0.3613	0.32505
spir	3_Junction_7945_Junction_7946	3_Junction_7945_Junction_7946	J002	0.193356	4.38279	0.0363035	0.275281	10.305	8.43994	-0.288044	chr2L	20342481	20343597	1117	+	10	84	161	76	0.2941	0.5419	0.8474	0.6387	-0.32505
CG9328	3_Junction_8238_Junction_8250	3_Junction_8238_Junction_8250	J001	0.0636204	3.98868	0.0458068	0.310326	12.0116	13.0189	0.116179	chr2L	20798514	20813154	14641	+	97	417	169	164	0.6978	0.5531	0.4333	0.4373	0.19015
CG9328	3_Junction_8238_Junction_8250	3_Junction_8238_Junction_8250	J002	0.0636711	3.98601	0.0458796	0.31054	12.7835	11.7715	-0.118988	chr2L	20810373	20813154	2782	+	42	337	221	211	0.3022	0.4469	0.5667	0.5627	-0.19015
NONE	3_Junction_82400_Junction_82402	3_Junction_82400_Junction_82402	J001	0.331981	7.88729	0.00497833	0.0869548	25.0214	19.7089	-0.344319	chrM	12841	13343	503	+	171	474	319	142139	0.3519	0.1192	0.5974	0.8802	-0.50325
NONE	3_Junction_82400_Junction_82402	3_Junction_82400_Junction_82402	J002	0.33201	7.8866	0.00498023	0.0869548	18.9161	24.2277	0.357042	chrM	12858	13343	486	+	315	3502	215	19346	0.6481	0.8808	0.4026	0.1198	0.50325
NONE	3_Junction_82442_Junction_82947	3_Junction_82442_Junction_82947	J001	0.360835	5.71596	0.0168114	0.179314	13.2341	16.7664	0.34131	chrM	13060	13187	128	+	176	2701	330	79	0.5131	0.7115	0.3287	0.0569	0.4195
NONE	3_Junction_82442_Junction_82947	3_Junction_82442_Junction_82947	J002	0.360791	5.71665	0.0168047	0.179314	18.2228	14.6786	-0.312034	chrM	9806	13187	3382	+	167	1095	674	1309	0.4869	0.2885	0.6713	0.9431	-0.4195
NONE	3_Junction_82534_Junction_82790_Junction_82828	3_Junction_82534_Junction_82790_Junction_82828	J001	1.0705	1.87477	0.170929	0.553076	17.0005	12.9996	-0.387115	chrM	1674	12815	11142	+	22	1353	337	552	0.0045	0.34	0.2594	0.6643	-0.2896
NONE	3_Junction_82534_Junction_82790_Junction_82828	3_Junction_82534_Junction_82790_Junction_82828	J002	0.0453393	5.19514	0.0226502	0.211858	12.5787	12.4309	-0.0170488	chrM	552	12815	12264	+	312	165	118	93	0.064	0.0415	0.0908	0.1119	-0.0486
NONE	3_Junction_82534_Junction_82790_Junction_82828	3_Junction_82534_Junction_82790_Junction_82828	J003	0.503859	2.65185	0.103429	0.44835	17.2649	20.6763	0.260139	chrM	6524	12815	6292	+	4540	2461	844	186	0.9315	0.6185	0.6497	0.2238	0.33825
X11Lbeta	3_Junction_84030_Junction_84035	3_Junction_84030_Junction_84035	J001	0.0617817	5.31367	0.0211587	0.203938	6.45334	7.52653	0.22194	chrX	10521922	10524220	2299	+	17	20	49	23	0.8947	0.9091	0.7313	0.6216	0.22545
X11Lbeta	3_Junction_84030_Junction_84035	3_Junction_84030_Junction_84035	J002	0.0704218	5.07986	0.0242053	0.218752	4.69594	2.85233	-0.719271	chrX	10521928	10524220	2293	+	2	2	18	14	0.1053	0.0909	0.2687	0.3784	-0.22545
Gs2	3_Junction_84793_Junction_84806	3_Junction_84793_Junction_84806	J001	0.0746109	28.3314	1.02226e-07	2.10223e-05	7.20195	10.4693	0.539705	chrX	11323910	11342196	18287	+	114	105	13	26	0.8769	0.8268	0.2364	0.4062	0.53055
Gs2	3_Junction_84793_Junction_84806	3_Junction_84793_Junction_84806	J002	0.0769171	27.7175	1.40389e-07	2.7236e-05	9.07457	5.44472	-0.736971	chrX	11326618	11342196	15579	+	16	22	42	38	0.1231	0.1732	0.7636	0.5938	-0.53055
fne	3_Junction_86561_Junction_86591	3_Junction_86561_Junction_86591	J001	0.0286104	9.89616	0.00165624	0.0421271	11.1741	12.618	0.175328	chrX	12813742	12835751	22010	+	25	342	177	178	0.2809	0.3123	0.1385	0.1752	0.13975
fne	3_Junction_86561_Junction_86591	3_Junction_86561_Junction_86591	J002	0.0283784	9.96632	0.0015943	0.0409569	16.2413	14.9689	-0.117693	chrX	12833275	12835751	2477	+	64	753	1101	838	0.7191	0.6877	0.8615	0.8248	-0.13975
fne	3_Junction_86604_Junction_86605	3_Junction_86604_Junction_86605	J001	0.0237667	15.5535	8.02041e-05	0.00469902	13.5748	12.1583	-0.158988	chrX	12836880	12837117	238	+	101	405	241	181	0.472	0.4407	0.713	0.6606	-0.23045
fne	3_Junction_86604_Junction_86605	3_Junction_86604_Junction_86605	J002	0.023796	15.5379	8.08669e-05	0.00473112	11.2253	12.7142	0.179691	chrX	12836889	12837117	229	+	113	514	97	93	0.528	0.5593	0.287	0.3394	0.23045
crc	3_Junction_8769_Junction_8772	3_Junction_8769_Junction_8772	J001	0.117841	10.1068	0.00147724	0.0387979	16.499	18.63	0.17525	chr2L	21312208	21318125	5918	+	722	1347	998	863	0.928	0.9733	0.8331	0.781	0.1436
crc	3_Junction_8769_Junction_8772	3_Junction_8769_Junction_8772	J002	0.11851	10.0527	0.00152122	0.0396744	12.1961	10.018	-0.283818	chr2L	21315538	21318125	2588	+	56	37	200	242	0.072	0.0267	0.1669	0.219	-0.1436
inaE	3_Junction_87853_Junction_87855	3_Junction_87853_Junction_87855	J001	0.100648	5.43149	0.0197768	0.196142	5.63758	3.92687	-0.521698	chrX	13698454	13700563	2110	+	5	5	15	22	0.25	0.119	0.3659	0.55	-0.27345
inaE	3_Junction_87853_Junction_87855	3_Junction_87853_Junction_87855	J002	0.0948688	5.6326	0.0176294	0.183379	5.99291	7.39891	0.304056	chrX	13699508	13700563	1056	+	15	37	26	18	0.75	0.881	0.6341	0.45	0.27345
nrv3	3_Junction_8813_Junction_8822_Junction_8824_Junction_8846	3_Junction_8813_Junction_8822_Junction_8824_Junction_8846	J001	0.178457	1.17214	0.278961	0.673275	15.1065	13.3688	-0.176294	chr2L	21380361	21382017	1657	+	57	493	565	570	0.6064	0.8272	0.7825	0.8948	-0.12185
nrv3	3_Junction_8813_Junction_8822_Junction_8824_Junction_8846	3_Junction_8813_Junction_8822_Junction_8824_Junction_8846	J002	0.0699684	2.34236	0.125898	0.486677	5.26593	2.99667	-0.813327	chr2L	21380600	21382017	1418	+	2	4	20	12	0.0213	0.0067	0.0277	0.0188	-0.00925
nrv3	3_Junction_8813_Junction_8822_Junction_8824_Junction_8846	3_Junction_8813_Junction_8822_Junction_8824_Junction_8846	J003	0.286179	0.00933606	0.923026	0.981796	8.89451	7.03721	-0.337912	chr2L	21380728	21382017	1290	+	15	25	112	30	0.1596	0.0419	0.1551	0.0471	-0.00035
nrv3	3_Junction_8813_Junction_8822_Junction_8824_Junction_8846	3_Junction_8813_Junction_8822_Junction_8824_Junction_8846	J004	0.0554937	16.3924	5.149e-05	0.00346035	6.29426	8.7969	0.482957	chr2L	21381832	21382017	186	+	20	74	25	25	0.2128	0.1242	0.0346	0.0392	0.1316
sd	3_Junction_91602_Junction_91607	3_Junction_91602_Junction_91607	J001	0.0437848	4.82893	0.027986	0.238155	5.39542	3.73965	-0.528832	chrX	15698946	15699589	644	+	3	5	22	19	0.0882	0.0806	0.22	0.2021	-0.12665
sd	3_Junction_91602_Junction_91607	3_Junction_91602_Junction_91607	J002	0.0386717	5.0679	0.0243728	0.219225	8.66621	9.48312	0.12996	chrX	15699210	15699589	380	+	31	57	78	75	0.9118	0.9194	0.78	0.7979	0.12665
kek5	3_Junction_96468_Junction_96490_Junction_96492	3_Junction_96468_Junction_96490_Junction_96492	J001	0.0601504	4.61191	0.0317507	0.256255	6.69823	8.31333	0.311646	chrX	19252044	19265548	13505	+	26	24	38	35	0.4906	0.4706	0.3393	0.2147	0.2036
kek5	3_Junction_96468_Junction_96490_Junction_96492	3_Junction_96468_Junction_96490_Junction_96492	J002	0.0315476	1.04454	0.306767	0.700117	6.31687	6.78957	0.10411	chrX	19257982	19265548	7567	+	16	15	27	35	0.3019	0.2941	0.2411	0.2147	0.0701
kek5	3_Junction_96468_Junction_96490_Junction_96492	3_Junction_96468_Junction_96490_Junction_96492	J003	0.0634455	7.93701	0.00484337	0.0858311	8.43593	6.11265	-0.464749	chrX	19259253	19265548	6296	+	11	12	47	93	0.2075	0.2353	0.4196	0.5706	-0.2737
Mgstl	3_Junction_98275_Junction_98277	3_Junction_98275_Junction_98277	J001	0.0777321	7.80319	0.00521542	0.0892436	13.2577	11.7952	-0.168625	chrX	20913674	20914705	1032	+	86	20	481	400	0.1614	0.0833	0.348	0.2686	-0.18595
Mgstl	3_Junction_98275_Junction_98277	3_Junction_98275_Junction_98277	J002	0.0775034	7.82326	0.0051578	0.0887595	15.7584	17.1803	0.124636	chrX	20914328	20914705	378	+	447	220	901	1089	0.8386	0.9167	0.652	0.7314	0.18595
NONE	5_Junction_101782_Junction_101783_Junction_101785	5_Junction_101782_Junction_101783_Junction_101785	J001	0.261978	8.24052	0.00409654	0.0773113	8.89656	3.9758	-1.162	chrX	2948087	2957708	9622	-	3	2	19	226	0.0252	0.0357	0.1387	0.4641	-0.27095
NONE	5_Junction_101782_Junction_101783_Junction_101785	5_Junction_101782_Junction_101783_Junction_101785	J002	0.440458	0.854275	0.355346	0.735865	6.95844	12.7051	0.868572	chrX	2948087	2976113	28027	-	84	14	62	62	0.7059	0.25	0.4526	0.1273	0.188
NONE	5_Junction_101782_Junction_101783_Junction_101785	5_Junction_101782_Junction_101783_Junction_101785	J003	0.258817	0.141861	0.706438	0.912563	8.95732	10.6227	0.246015	chrX	2948087	2984147	36061	-	32	40	56	199	0.2689	0.7143	0.4088	0.4086	0.0829
CG32816	5_Junction_102254_Junction_102259_Junction_102260_Junction_102261	5_Junction_102254_Junction_102259_Junction_102260_Junction_102261	J001	0.137538	12.6064	0.000384419	0.0154251	8.74134	4.3619	-1.0029	chrX	314132	317659	3528	-	6	9	37	70	0.0323	0.0247	0.1254	0.2979	-0.18315
CG32816	5_Junction_102254_Junction_102259_Junction_102260_Junction_102261	5_Junction_102254_Junction_102259_Junction_102260_Junction_102261	J002	0.0560614	0.300391	0.583637	0.866116	8.73416	9.55433	0.129485	chrX	314132	472175	158044	-	35	106	67	43	0.1882	0.2912	0.2271	0.183	0.03465
CG32816	5_Junction_102254_Junction_102259_Junction_102260_Junction_102261	5_Junction_102254_Junction_102259_Junction_102260_Junction_102261	J003	0.0860161	0.000629137	0.979989	0.995108	9.54417	9.92287	0.0561381	chrX	314132	472227	158096	-	36	131	86	61	0.1935	0.3599	0.2915	0.2596	0.00115
CG32816	5_Junction_102254_Junction_102259_Junction_102260_Junction_102261	5_Junction_102254_Junction_102259_Junction_102260_Junction_102261	J004	0.136608	1.25341	0.262902	0.657718	9.86959	11.7589	0.252687	chrX	314132	472234	158103	-	109	118	105	61	0.586	0.3242	0.3559	0.2596	0.14735
Cda5	5_Junction_10459_Junction_10460	5_Junction_10459_Junction_10460	J001	0.113529	8.765	0.00307066	0.0639459	8.32807	5.90544	-0.495939	chr2L	33270	33843	574	-	11	24	33	53	0.1964	0.4286	0.7333	0.6709	-0.3896
Cda5	5_Junction_10459_Junction_10460	5_Junction_10459_Junction_10460	J002	0.112505	8.82346	0.00297383	0.0626303	6.26095	8.64001	0.464651	chr2L	33270	34556	1287	-	45	32	12	26	0.8036	0.5714	0.2667	0.3291	0.3896
CG44774	5_Junction_104804_Junction_104809	5_Junction_104804_Junction_104809	J001	0.525536	6.93239	0.00846486	0.121102	3.76067	7.2913	0.955187	chrX	4824098	4825030	933	-	46	47	5	1	0.6571	0.1193	0.0309	0.0083	0.3686
CG44774	5_Junction_104804_Junction_104809	5_Junction_104804_Junction_104809	J002	0.519674	7.00008	0.00815059	0.118442	13.5368	9.35317	-0.533358	chrX	4824098	4832006	7909	-	24	347	157	119	0.3429	0.8807	0.9691	0.9917	-0.3686
Moe	5_Junction_110703_Junction_110704	5_Junction_110703_Junction_110704	J001	0.212569	4.31088	0.0378693	0.28099	6.63702	4.67332	-0.506087	chrX	8770785	8772500	1716	-	6	8	43	17	0.12	0.0473	0.4175	0.1619	-0.20605
Moe	5_Junction_110703_Junction_110704	5_Junction_110703_Junction_110704	J002	0.205606	4.44091	0.0350875	0.269993	9.10503	11.04	0.278	chrX	8770785	8774323	3539	-	44	161	60	88	0.88	0.9527	0.5825	0.8381	0.20605
CG31635	5_Junction_12990_Junction_12994_Junction_13000	5_Junction_12990_Junction_12994_Junction_13000	J001	0.0475416	5.20368	0.0225391	0.211598	3.51318	5.11097	0.540818	chr2L	6646947	6647745	799	-	11	12	6	4	0.2292	0.2353	0.0896	0.0851	0.1449
CG31635	5_Junction_12990_Junction_12994_Junction_13000	5_Junction_12990_Junction_12994_Junction_13000	J002	0.0431992	3.36759	0.0664911	0.368976	5.82379	6.91923	0.248653	chr2L	6646947	6647919	973	-	25	21	19	14	0.5208	0.4118	0.2836	0.2979	0.17555
CG31635	5_Junction_12990_Junction_12994_Junction_13000	5_Junction_12990_Junction_12994_Junction_13000	J003	0.0433661	10.5072	0.00118913	0.0333322	7.69613	5.63081	-0.45079	chr2L	6646947	6649028	2082	-	12	18	42	29	0.25	0.3529	0.6269	0.617	-0.3205
Nckx30C	5_Junction_15612_Junction_15613	5_Junction_15612_Junction_15613	J001	0.0233653	7.96348	0.00477306	0.0853156	12.5592	11.5744	-0.117803	chr2L	9727256	9732914	5659	-	18	265	276	233	0.2857	0.326	0.4623	0.5032	-0.1769
Nckx30C	5_Junction_15612_Junction_15613	5_Junction_15612_Junction_15613	J002	0.0232848	7.9837	0.00472004	0.0846863	12.7811	13.7047	0.100658	chr2L	9727256	9732953	5698	-	45	548	321	230	0.7143	0.674	0.5377	0.4968	0.1769
unc-104	5_Junction_18727_Junction_18728	5_Junction_18727_Junction_18728	J001	0.0426513	13.188	0.000281742	0.0123143	8.91235	10.8841	0.288348	chr2R	12651879	12652831	953	-	43	44	141	105	0.7288	0.6286	0.4006	0.3302	0.3133
unc-104	5_Junction_18727_Junction_18728	5_Junction_18727_Junction_18728	J002	0.04248	13.2241	0.000276378	0.0121426	10.4744	8.45326	-0.309282	chr2R	12651879	12653336	1458	-	16	26	211	213	0.2712	0.3714	0.5994	0.6698	-0.3133
crol	5_Junction_2292_Junction_2293	5_Junction_2292_Junction_2293	J001	0.0269204	12.2694	0.000460448	0.0173961	12.345	10.9743	-0.16979	chr2L	11806157	11808012	1856	-	26	187	214	258	0.3421	0.3659	0.5558	0.6187	-0.23325
crol	5_Junction_2292_Junction_2293	5_Junction_2292_Junction_2293	J002	0.0269151	12.2712	0.000459992	0.0173961	11.2671	12.6157	0.163102	chr2L	11806157	11809124	2968	-	50	324	171	159	0.6579	0.6341	0.4442	0.3813	0.23325
DnaJ-60	5_Junction_25003_Junction_25004	5_Junction_25003_Junction_25004	J001	0.0832369	4.08916	0.0431592	0.299948	7.04458	8.3252	0.240971	chr2R	20046608	20046666	59	-	25	61	24	33	0.6098	0.404	0.24	0.3028	0.2355
DnaJ-60	5_Junction_25003_Junction_25004	5_Junction_25003_Junction_25004	J002	0.0820906	4.12764	0.0421882	0.297409	9.65766	8.45903	-0.191181	chr2R	20046608	20046670	63	-	16	90	76	76	0.3902	0.596	0.76	0.6972	-0.2355
Mmp1	5_Junction_25409_Junction_25411	5_Junction_25409_Junction_25411	J001	0.156516	4.896	0.0269189	0.232937	4.68324	6.50709	0.474504	chr2R	20559829	20560072	244	-	14	10	12	16	0.9333	0.6667	0.3429	0.5333	0.3619
Mmp1	5_Junction_25409_Junction_25411	5_Junction_25409_Junction_25411	J002	0.164949	4.75416	0.0292276	0.244131	5.21562	3.16855	-0.719014	chr2R	20559829	20562494	2666	-	1	5	23	14	0.0667	0.3333	0.6571	0.4667	-0.3619
Dscam1	5_Junction_26846_Junction_26847	5_Junction_26846_Junction_26847	J001	0.0683351	5.16564	0.0230379	0.213599	7.13826	8.19252	0.198735	chr2R	3210837	3212073	1237	-	12	32	62	53	0.9231	0.9412	0.8052	0.7067	0.1762
Dscam1	5_Junction_26846_Junction_26847	5_Junction_26846_Junction_26847	J002	0.0779945	4.90177	0.0268291	0.232424	4.60487	2.71194	-0.763834	chr2R	3210837	3212085	1249	-	1	2	15	22	0.0769	0.0588	0.1948	0.2933	-0.1762
Dscam1	5_Junction_27005_Junction_27009	5_Junction_27005_Junction_27009	J001	0.0575497	6.72306	0.00951744	0.128891	4.05574	5.52574	0.446205	chr2R	3249372	3251681	2310	-	7	5	17	15	0.875	0.8333	0.4474	0.4412	0.40985
Dscam1	5_Junction_27005_Junction_27009	5_Junction_27005_Junction_27009	J002	0.0594091	6.67391	0.00978346	0.130724	4.46813	2.39358	-0.900503	chr2R	3249372	3252815	3444	-	1	1	21	19	0.125	0.1667	0.5526	0.5588	-0.40985
CG42732	5_Junction_31345_Junction_31346	5_Junction_31345_Junction_31346	J001	0.0541933	8.43502	0.00368063	0.0717444	4.96099	6.78688	0.452122	chr2R	6227707	6275637	47931	-	20	11	19	11	0.7143	0.6471	0.2923	0.3929	0.3381
CG42732	5_Junction_31345_Junction_31346	5_Junction_31345_Junction_31346	J002	0.0542697	8.42929	0.00369225	0.0719027	6.60667	4.72158	-0.484652	chr2R	6227707	6299739	72033	-	8	6	46	17	0.2857	0.3529	0.7077	0.6071	-0.3381
lola	5_Junction_31720_Junction_31721	5_Junction_31720_Junction_31721	J001	0.0249315	16.231	5.60703e-05	0.00362597	9.03555	6.65082	-0.44208	chr2R	6421473	6422353	881	-	35	23	33	49	0.0764	0.0719	0.193	0.2168	-0.13075
lola	5_Junction_31720_Junction_31721	5_Junction_31720_Junction_31721	J002	0.0239389	16.6322	4.53749e-05	0.00314179	12.9397	14.3372	0.147959	chr2R	6421473	6428848	7376	-	423	297	138	177	0.9236	0.9281	0.807	0.7832	0.13075
MFS17	5_Junction_35284_Junction_35286_Junction_35288_Junction_35290	5_Junction_35284_Junction_35286_Junction_35288_Junction_35290	J001	0.0274304	9.84642	0.00170163	0.0427993	8.66573	9.7652	0.172329	chr2RHet	1265686	1286304	20619	-	45	102	57	48	0.0998	0.0782	0.0426	0.036	0.0497
MFS17	5_Junction_35284_Junction_35286_Junction_35288_Junction_35290	5_Junction_35284_Junction_35286_Junction_35288_Junction_35290	J002	0.0850958	4.59588	0.0320489	0.257793	10.8129	11.8255	0.12914	chr2RHet	1265686	1291240	25555	-	68	264	73	146	0.1508	0.2025	0.0546	0.1094	0.09465
MFS17	5_Junction_35284_Junction_35286_Junction_35288_Junction_35290	5_Junction_35284_Junction_35286_Junction_35288_Junction_35290	J003	0.0443403	12.0292	0.000523724	0.018897	17.5306	15.2933	-0.196979	chr2RHet	1265686	1292102	26417	-	244	752	1104	993	0.541	0.5767	0.8257	0.7444	-0.2262
MFS17	5_Junction_35284_Junction_35286_Junction_35288_Junction_35290	5_Junction_35284_Junction_35286_Junction_35288_Junction_35290	J004	0.0545689	4.23199	0.0396688	0.288717	11.1688	11.8134	0.0809488	chr2RHet	1265686	1293054	27369	-	94	186	103	147	0.2084	0.1426	0.077	0.1102	0.0819
NONE	5_Junction_35760_Junction_35763	5_Junction_35760_Junction_35763	J001	0.074055	26.0535	3.32088e-07	5.66061e-05	5.49419	1.56161	-1.81488	chr2RHet	3080082	3080149	68	-	1	1	12	15	0.0625	0.0294	0.6316	0.6522	-0.59595
NONE	5_Junction_35760_Junction_35763	5_Junction_35760_Junction_35763	J002	0.064061	27.452	1.61044e-07	3.01072e-05	4.29611	6.58232	0.615567	chr2RHet	3080082	3085749	5668	-	15	33	7	8	0.9375	0.9706	0.3684	0.3478	0.59595
NONE	5_Junction_37129_Junction_37131	5_Junction_37129_Junction_37131	J001	0.0876282	6.35009	0.0117375	0.144493	5.92703	7.1057	0.261667	chr3L	11247752	11247776	25	-	15	26	32	14	0.9375	0.9286	0.7619	0.5833	0.26045
NONE	5_Junction_37129_Junction_37131	5_Junction_37129_Junction_37131	J002	0.10693	5.88711	0.0152521	0.169679	4.2371	2.2138	-0.936552	chr3L	11247752	11247784	33	-	1	2	10	10	0.0625	0.0714	0.2381	0.4167	-0.26045
CG11597	5_Junction_37463_Junction_37464	5_Junction_37463_Junction_37464	J001	0.188349	5.68437	0.0171167	0.180975	9.85748	7.7602	-0.345125	chr3L	11812007	11812919	913	-	29	28	59	95	0.1973	0.0767	0.3224	0.4948	-0.2716
CG11597	5_Junction_37463_Junction_37464	5_Junction_37463_Junction_37464	J002	0.18645	5.73893	0.0165929	0.178228	10.8294	12.9212	0.254792	chr3L	11812007	11814932	2926	-	118	337	124	97	0.8027	0.9233	0.6776	0.5052	0.2716
pHCl	5_Junction_40252_Junction_40253	5_Junction_40252_Junction_40253	J001	0.0810768	19.317	1.10718e-05	0.00103025	9.10154	6.20833	-0.551906	chr3L	15853126	15856182	3057	-	11	32	84	32	0.3056	0.2078	0.8	0.6531	-0.46985
pHCl	5_Junction_40252_Junction_40253	5_Junction_40252_Junction_40253	J002	0.0806974	19.3877	1.0669e-05	0.000997281	6.26179	9.13836	0.54536	chr3L	15853126	15857066	3941	-	25	122	21	17	0.6944	0.7922	0.2	0.3469	0.46985
Pdp1	5_Junction_51911_Junction_51913	5_Junction_51911_Junction_51913	J001	0.0319735	141.39	1.32239e-32	9.06479e-29	14.2587	9.12288	-0.644287	chr3L	7811323	7823485	12163	-	16	46	639	767	0.1882	0.2233	0.9025	0.9252	-0.7081
Pdp1	5_Junction_51911_Junction_51913	5_Junction_51911_Junction_51913	J002	0.0324146	139.932	2.75499e-32	1.61872e-28	7.43745	13.0941	0.816042	chr3L	7811323	7846281	34959	-	69	160	69	62	0.8118	0.7767	0.0975	0.0748	0.7081
PRL-1	5_Junction_5238_Junction_5240	5_Junction_5238_Junction_5240	J001	0.0694608	13.0805	0.000298381	0.012918	7.06957	4.59557	-0.621378	chr2L	16250158	16251239	1082	-	9	7	29	30	0.1233	0.0603	0.4028	0.303	-0.2611
PRL-1	5_Junction_5238_Junction_5240	5_Junction_5238_Junction_5240	J002	0.0654398	13.5892	0.000227493	0.0105248	8.79207	10.6046	0.270417	chr2L	16250158	16257074	6917	-	64	109	43	69	0.8767	0.9397	0.5972	0.697	0.2611
Argk	5_Junction_53187_Junction_53191	5_Junction_53187_Junction_53191	J001	0.0191107	10.2509	0.00136619	0.0366046	14.6275	13.6489	-0.099899	chr3L	9043459	9050641	7183	-	63	653	480	334	0.4065	0.4554	0.6015	0.6162	-0.1779
Argk	5_Junction_53187_Junction_53191	5_Junction_53187_Junction_53191	J002	0.0191224	10.246	0.00136984	0.0366413	13.3078	14.3013	0.103876	chr3L	9043459	9057562	14104	-	92	781	318	208	0.5935	0.5446	0.3985	0.3838	0.1779
CG40228	5_Junction_55081_Junction_55083_Junction_55084_Junction_55085_Junction_55086	5_Junction_55081_Junction_55083_Junction_55084_Junction_55085_Junction_55086	J001	0.124753	0.00674726	0.934534	0.98413	5.69077	5.49488	-0.0505371	chr3LHet	2190418	2190469	52	-	11	21	16	11	0.0223	0.0228	0.0378	0.0118	-0.00225
CG40228	5_Junction_55081_Junction_55083_Junction_55084_Junction_55085_Junction_55086	5_Junction_55081_Junction_55083_Junction_55084_Junction_55085_Junction_55086	J002	0.0253616	19.847	8.38922e-06	0.000827435	15.576	13.3788	-0.219369	chr3LHet	2190418	2190547	130	-	180	405	279	622	0.3651	0.4388	0.6596	0.6681	-0.2619
CG40228	5_Junction_55081_Junction_55083_Junction_55084_Junction_55085_Junction_55086	5_Junction_55081_Junction_55083_Junction_55084_Junction_55085_Junction_55086	J003	0.0699734	2.71264	0.0995563	0.441471	4.84076	6.10453	0.334647	chr3LHet	2190418	2190555	138	-	12	33	9	9	0.0243	0.0358	0.0213	0.0097	0.01455
CG40228	5_Junction_55081_Junction_55083_Junction_55084_Junction_55085_Junction_55086	5_Junction_55081_Junction_55083_Junction_55084_Junction_55085_Junction_55086	J004	0.0252871	10.335	0.00130529	0.0356002	11.9561	12.9725	0.117712	chr3LHet	2190418	2190560	143	-	175	305	71	199	0.355	0.3304	0.1678	0.2137	0.15195
CG40228	5_Junction_55081_Junction_55083_Junction_55084_Junction_55085_Junction_55086	5_Junction_55081_Junction_55083_Junction_55084_Junction_55085_Junction_55086	J005	0.0356779	6.88328	0.00870057	0.122971	9.97549	11.4675	0.201096	chr3LHet	2190418	2190562	145	-	115	159	48	90	0.2333	0.1723	0.1135	0.0967	0.0977
SIDL	5_Junction_56302_Junction_56303	5_Junction_56302_Junction_56303	J001	0.0598038	12.3792	0.000434151	0.0167294	8.34908	10.3846	0.314762	chr3R	11040812	11040963	152	-	34	115	68	55	0.5667	0.434	0.1655	0.234	0.3006
SIDL	5_Junction_56302_Junction_56303	5_Junction_56302_Junction_56303	J002	0.0591185	12.4919	0.000408711	0.0160553	12.4489	10.5763	-0.235184	chr3R	11040812	11041059	248	-	26	150	343	180	0.4333	0.566	0.8345	0.766	-0.3006
Rim	5_Junction_58411_Junction_58412	5_Junction_58411_Junction_58412	J001	0.0880378	4.22414	0.0398528	0.289486	10.3142	11.4853	0.155163	chr3R	13701267	13702052	786	-	18	246	172	92	0.4186	0.2805	0.2118	0.1242	0.18155
Rim	5_Junction_58411_Junction_58412	5_Junction_58411_Junction_58412	J002	0.0874344	4.24693	0.0393213	0.287412	15.0839	13.9574	-0.111984	chr3R	13701267	13702787	1521	-	25	631	640	649	0.5814	0.7195	0.7882	0.8758	-0.18155
Ada2a	5_Junction_59063_Junction_59064	5_Junction_59063_Junction_59064	J001	0.0463625	5.32701	0.0209974	0.2032	8.12455	6.85617	-0.244886	chr3R	14079177	14079246	70	-	12	29	58	49	0.2727	0.2736	0.537	0.4188	-0.20475
Ada2a	5_Junction_59063_Junction_59064	5_Junction_59063_Junction_59064	J001	0.0463625	5.32701	0.0209974	0.2032	8.12455	6.85617	-0.244886	chr3R	14079177	14079246	70	-	12	29	58	49	0.2727	0.2736	0.537	0.4188	-0.20475
Ada2a	5_Junction_59063_Junction_59064	5_Junction_59063_Junction_59064	J002	0.0456059	5.38386	0.0203238	0.199213	8.41899	9.52156	0.177551	chr3R	14079177	14081037	1861	-	32	77	50	68	0.7273	0.7264	0.463	0.5812	0.20475
Ada2a	5_Junction_59063_Junction_59064	5_Junction_59063_Junction_59064	J002	0.0456059	5.38386	0.0203238	0.199213	8.41899	9.52156	0.177551	chr3R	14079177	14081037	1861	-	32	77	50	68	0.7273	0.7264	0.463	0.5812	0.20475
CG31207	5_Junction_62087_Junction_62088	5_Junction_62087_Junction_62088	J001	0.0448694	9.54394	0.00200611	0.0482946	4.92263	7.27031	0.562588	chr3R	16872541	16872633	93	-	9	3	52	50	0.5294	0.5	0.1905	0.1524	0.34325
CG31207	5_Junction_62087_Junction_62088	5_Junction_62087_Junction_62088	J002	0.042596	9.70591	0.00183676	0.0451898	8.81071	6.99844	-0.332225	chr3R	16872541	16872637	97	-	8	3	221	278	0.4706	0.5	0.8095	0.8476	-0.34325
CASK	5_Junction_62704_Junction_62705	5_Junction_62704_Junction_62705	J001	0.0584709	8.87033	0.00289843	0.0617333	13.0201	14.3836	0.143675	chr3R	17613824	17614594	771	-	70	704	305	271	0.8046	0.6673	0.4525	0.4883	0.26555
CASK	5_Junction_62704_Junction_62705	5_Junction_62704_Junction_62705	J002	0.0585647	8.85894	0.00291657	0.0619285	13.3821	11.9961	-0.157736	chr3R	17613824	17615169	1346	-	17	351	369	284	0.1954	0.3327	0.5475	0.5117	-0.26555
NONE	5_Junction_71461_Junction_71463	5_Junction_71461_Junction_71463	J001	0.249361	8.15546	0.00429318	0.0797994	9.92654	12.9302	0.381384	chr3R	26566177	26573474	7298	-	49	288	124	134	0.9074	0.9897	0.7654	0.709	0.21135
NONE	5_Junction_71461_Junction_71463	5_Junction_71461_Junction_71463	J002	0.256533	7.95256	0.00480194	0.0855716	7.18871	4.287	-0.745763	chr3R	26566177	26614736	48560	-	5	3	38	55	0.0926	0.0103	0.2346	0.291	-0.21135
CG10237	5_Junction_7256_Junction_7258	5_Junction_7256_Junction_7258	J001	0.0414537	59.2813	1.36671e-14	1.51923e-11	7.45926	11.6833	0.647349	chr2L	19437845	19438007	163	-	99	29	34	62	0.3626	0.2736	0.0297	0.0395	0.2835
CG10237	5_Junction_7256_Junction_7258	5_Junction_7256_Junction_7258	J002	0.0407412	60.1108	8.96648e-15	1.05366e-11	17.0879	13.6484	-0.324243	chr2L	19437845	19441157	3313	-	174	77	1112	1509	0.6374	0.7264	0.9703	0.9605	-0.2835
pyd	5_Junction_73866_Junction_73867	5_Junction_73866_Junction_73867	J001	0.0889984	7.77585	0.00529494	0.0902503	8.33502	9.82763	0.237657	chr3R	4654040	4654555	516	-	21	113	80	44	0.875	0.9496	0.7843	0.6567	0.1918
pyd	5_Junction_73866_Junction_73867	5_Junction_73866_Junction_73867	J002	0.0964741	7.35727	0.00667921	0.104611	5.84215	3.78571	-0.625935	chr3R	4654040	4657862	3823	-	3	6	22	23	0.125	0.0504	0.2157	0.3433	-0.1918
rump	5_Junction_74662_Junction_74663	5_Junction_74662_Junction_74663	J001	0.040724	4.53866	0.0331376	0.262149	7.79962	8.87331	0.186068	chr3R	5333108	5334011	904	-	44	72	34	31	0.7097	0.6316	0.5152	0.4366	0.19475
rump	5_Junction_74662_Junction_74663	5_Junction_74662_Junction_74663	J002	0.0414694	4.49164	0.034061	0.266027	8.08728	6.90177	-0.22869	chr3R	5333108	5335156	2049	-	18	42	32	40	0.2903	0.3684	0.4848	0.5634	-0.19475
CG9813	5_Junction_78207_Junction_78209	5_Junction_78207_Junction_78209	J001	0.0245358	4.8427	0.0277634	0.237105	10.0237	10.9572	0.12846	chr3R	9204832	9205294	463	-	100	115	82	69	0.5814	0.518	0.4039	0.4035	0.146
CG9813	5_Junction_78207_Junction_78209	5_Junction_78207_Junction_78209	J002	0.0245381	4.84239	0.0277684	0.237105	11.1488	10.231	-0.123944	chr3R	9204832	9205340	509	-	72	107	121	102	0.4186	0.482	0.5961	0.5965	-0.146
Smr	5_Junction_86327_Junction_86333	5_Junction_86327_Junction_86333	J001	0.0418978	23.2872	1.39525e-06	0.000186712	3.64333	6.76024	0.891816	chrX	12625939	12626383	445	-	12	24	8	7	0.3243	0.2892	0.0471	0.0551	0.25565
Smr	5_Junction_86327_Junction_86333	5_Junction_86327_Junction_86333	J002	0.0376818	24.4452	7.6452e-07	0.000113927	10.6098	8.98308	-0.240113	chrX	12625939	12636350	10412	-	25	59	162	120	0.6757	0.7108	0.9529	0.9449	-0.25565
RpS15Aa	5_Junction_87077_Junction_87078	5_Junction_87077_Junction_87078	J001	0.096814	4.29743	0.0381699	0.282351	12.2036	10.6772	-0.192776	chrX	13231572	13231638	67	-	96	122	100	171	0.6486	0.8133	0.9091	0.868	-0.1576
RpS15Aa	5_Junction_87077_Junction_87078	5_Junction_87077_Junction_87078	J002	0.0985345	4.23752	0.0395398	0.288148	6.63488	8.32434	0.327265	chrX	13231572	13231642	71	-	52	28	10	26	0.3514	0.1867	0.0909	0.132	0.1576
nompB	5_Junction_8884_Junction_8891	5_Junction_8884_Junction_8891	J001	0.0252028	8.01358	0.00464279	0.0839193	12.4101	11.352	-0.128568	chr2L	21390267	21390340	74	-	78	455	110	110	0.5612	0.5502	0.7006	0.7586	-0.1739
nompB	5_Junction_8884_Junction_8891	5_Junction_8884_Junction_8891	J002	0.0253478	7.98158	0.00472558	0.0847247	9.52787	10.7394	0.172682	chr2L	21390267	21588771	198505	-	61	372	47	35	0.4388	0.4498	0.2994	0.2414	0.1739
Lsd-2	5_Junction_90861_Junction_90862	5_Junction_90861_Junction_90862	J001	0.0322145	10.5455	0.0011647	0.0328327	5.71687	7.4245	0.377069	chrX	14966681	14967372	692	-	25	11	21	27	0.3289	0.3548	0.14	0.1292	0.20725
Lsd-2	5_Junction_90861_Junction_90862	5_Junction_90861_Junction_90862	J002	0.0305871	10.81	0.00100952	0.0296999	10.6452	9.56261	-0.154733	chrX	14966681	14967968	1288	-	51	20	129	182	0.6711	0.6452	0.86	0.8708	-0.20725
AnxB11	5_Junction_92981_Junction_92982	5_Junction_92981_Junction_92982	J001	0.0502167	8.84019	0.00294668	0.0622465	6.17011	4.37029	-0.497568	chrX	16313082	16313235	154	-	5	9	19	27	0.2632	0.2368	0.5429	0.6279	-0.3354
AnxB11	5_Junction_92981_Junction_92982	5_Junction_92981_Junction_92982	J002	0.0488085	8.95297	0.0027702	0.0598714	5.33722	6.88887	0.36818	chrX	16313082	16314081	1000	-	14	29	16	16	0.7368	0.7632	0.4571	0.3721	0.3354
para	5_Junction_93100_Junction_93101	5_Junction_93100_Junction_93101	J001	0.0728214	6.74538	0.00939908	0.128132	8.70288	7.21261	-0.270972	chrX	16377892	16380372	2481	-	27	55	42	30	0.4737	0.3846	0.7925	0.625	-0.2796
para	5_Junction_93100_Junction_93101	5_Junction_93100_Junction_93101	J002	0.073002	6.73355	0.00946163	0.128432	6.39896	7.96642	0.316094	chrX	16377892	16380411	2520	-	30	88	11	18	0.5263	0.6154	0.2075	0.375	0.2796
stnA	5_Junction_99196_Junction_99199	5_Junction_99196_Junction_99199	J001	0.0725927	3.98726	0.0458457	0.310436	4.03674	5.48268	0.441692	chrX	22397750	22406263	8514	-	10	15	8	7	0.2439	0.125	0.0684	0.0667	0.1169
stnA	5_Junction_99196_Junction_99199	5_Junction_99196_Junction_99199	J002	0.0639846	4.23127	0.0396857	0.288789	10.4003	9.52448	-0.126918	chrX	22397750	22406446	8697	-	31	105	109	98	0.7561	0.875	0.9316	0.9333	-0.1169

## Sheet: AS A3SS events
Gene	AS_event_ID	AS_structure_ID	sub_junction_ID	sub-junction_dispersion_estimate	LRT_statistic-full_vs_reduced	LRT_p_value-full_vs_reduced	BH_adjusted_p-values	DN1	TH	fitting_parameter_log2fold_change_TH_DN1	sub_junction_chr	sub_junction_start_coor	sub_junction_end_coor	sub_junction_size	sub_junction_strand	raw_count.IndexA	raw_count.IndexB	raw_count.IndexC	raw_count.IndexD	percentage_usage.IndexA	percentage_usage.IndexB	percentage_usage.IndexC	percentage_usage.IndexD	deltaPSI
CG10804	3_Junction_102796_Junction_102803	3_Junction_102796_Junction_102803	J001	0.0390305	14.8339	0.000117404	0.00631704	11.1795	12.7238	0.186672	chrX	3375377	3376057	681	-	109	345	100	137	0.872	0.8869	0.6211	0.7135	0.21215
CG10804	3_Junction_102796_Junction_102803	3_Junction_102796_Junction_102803	J002	0.0401307	14.5362	0.000137493	0.00710423	9.10655	7.08074	-0.363003	chrX	3375402	3376057	656	-	16	44	61	55	0.128	0.1131	0.3789	0.2865	-0.21215
Fas2	3_Junction_103513_Junction_103518	3_Junction_103513_Junction_103518	J001	0.0342494	4.40161	0.035905	0.273562	8.35471	9.3082	0.155913	chrX	4030803	4035802	5000	-	35	118	45	37	0.625	0.5488	0.3814	0.4353	0.17855
Fas2	3_Junction_103513_Junction_103518	3_Junction_103513_Junction_103518	J002	0.0343024	4.39754	0.0359907	0.273818	9.41085	8.46625	-0.152603	chrX	4033350	4035802	2453	-	21	97	73	48	0.375	0.4512	0.6186	0.5647	-0.17855
Sxl	3_Junction_107870_Junction_107871	3_Junction_107870_Junction_107871	J001	0.0764199	9.15132	0.00248538	0.0555853	12.507	10.8286	-0.207886	chrX	6979987	6981645	1659	-	34	208	236	191	0.5763	0.7172	0.9077	0.8489	-0.23155
Sxl	3_Junction_107870_Junction_107871	3_Junction_107870_Junction_107871	J002	0.0780534	9.00516	0.00269219	0.0587724	6.9718	8.88033	0.349082	chrX	6980011	6981645	1635	-	25	82	24	34	0.4237	0.2828	0.0923	0.1511	0.23155
capu	3_Junction_10841_Junction_10866_Junction_10873	3_Junction_10841_Junction_10866_Junction_10873	J001	0.211294	3.45596	0.0630241	0.359926	5.56294	3.37423	-0.721289	chr2L	3847614	3888267	40654	-	5	1	15	20	0.1724	0.0323	0.2174	0.4545	-0.2336
capu	3_Junction_10841_Junction_10866_Junction_10873	3_Junction_10841_Junction_10866_Junction_10873	J002	0.0654163	12.862	0.00033532	0.0140299	3.2128	5.65218	0.814976	chr2L	3876157	3888267	12111	-	11	13	8	2	0.3793	0.4194	0.1159	0.0455	0.31865
capu	3_Junction_10841_Junction_10866_Junction_10873	3_Junction_10841_Junction_10866_Junction_10873	J003	0.0717512	0.551307	0.457784	0.803417	7.07738	6.18378	-0.194725	chr2L	3883981	3888267	4287	-	13	17	46	22	0.4483	0.5484	0.6667	0.5	-0.085
unc-104	3_Junction_18713_Junction_18715	3_Junction_18713_Junction_18715	J001	0.141397	4.28738	0.0383962	0.283373	10.6802	9.18504	-0.217578	chr2R	12648219	12649171	953	-	12	86	180	144	0.5	0.789	0.8571	0.9057	-0.2369
unc-104	3_Junction_18713_Junction_18715	3_Junction_18713_Junction_18715	J002	0.146942	4.17457	0.041035	0.293569	5.50156	7.11754	0.371537	chr2R	12648952	12649171	220	-	12	23	30	15	0.5	0.211	0.1429	0.0943	0.2369
CG8963	3_Junction_19031_Junction_19032	3_Junction_19031_Junction_19032	J001	0.0663632	6.84338	0.00889702	0.124127	8.74275	7.64281	-0.193984	chr2R	12906826	12906936	111	-	45	28	38	37	0.7143	0.7179	0.8636	0.9737	-0.20255
CG8963	3_Junction_19031_Junction_19032	3_Junction_19031_Junction_19032	J002	0.0748031	6.50539	0.0107548	0.138139	3.45712	5.23105	0.59753	chr2R	12906854	12906936	83	-	18	11	6	1	0.2857	0.2821	0.1364	0.0263	0.20255
stmA	3_Junction_28764_Junction_28765	3_Junction_28764_Junction_28765	J001	0.260054	4.71071	0.0299753	0.247511	11.2936	9.08366	-0.314155	chr2R	4619316	4619663	348	-	15	171	118	105	0.2055	0.6107	0.8252	0.7447	-0.37685
stmA	3_Junction_28764_Junction_28765	3_Junction_28764_Junction_28765	J002	0.260765	4.69914	0.0301776	0.248334	7.71217	9.89775	0.359964	chr2R	4619468	4619663	196	-	58	109	25	36	0.7945	0.3893	0.1748	0.2553	0.37685
NONE	3_Junction_38461_Junction_38464	3_Junction_38461_Junction_38464	J001	0.0474027	25.9516	3.50088e-07	5.90114e-05	8.32922	5.38349	-0.629639	chr3L	13321374	13329189	7816	-	6	6	72	127	0.24	0.3529	0.8471	0.8038	-0.529
NONE	3_Junction_38461_Junction_38464	3_Junction_38461_Junction_38464	J002	0.0496961	25.4046	4.64815e-07	7.61649e-05	4.73755	7.96661	0.749823	chr3L	13328395	13329189	795	-	19	11	13	31	0.76	0.6471	0.1529	0.1962	0.529
CG13937	3_Junction_42701_Junction_42705	3_Junction_42701_Junction_42705	J001	0.11102	6.68009	0.00974956	0.130531	10.6671	9.02135	-0.241751	chr3L	1878039	1881127	3089	-	16	163	101	76	0.4324	0.6849	0.8707	0.8261	-0.28975
CG13937	3_Junction_42701_Junction_42705	3_Junction_42701_Junction_42705	J002	0.113247	6.58558	0.0102808	0.134454	6.0614	7.84893	0.372844	chr3L	1878559	1881127	2569	-	21	75	15	16	0.5676	0.3151	0.1293	0.1739	0.28975
bol	3_Junction_53301_Junction_53303	3_Junction_53301_Junction_53303	J001	0.0926669	6.12922	0.0132965	0.156563	13.5016	12.0234	-0.167282	chr3L	9099617	9100440	824	-	40	355	311	278	0.4598	0.666	0.836	0.7787	-0.24445
bol	3_Junction_53301_Junction_53303	3_Junction_53301_Junction_53303	J002	0.0932999	6.09379	0.0135658	0.158796	9.33803	10.8725	0.21949	chr3L	9100255	9100440	186	-	47	178	61	79	0.5402	0.334	0.164	0.2213	0.24445
CG12163	3_Junction_55976_Junction_55987	3_Junction_55976_Junction_55987	J001	0.0757625	8.65081	0.00326917	0.0665302	13.9099	12.3964	-0.166194	chr3R	1065341	1077144	11804	-	37	412	335	355	0.74	0.8692	0.9544	0.9416	-0.1434
CG12163	3_Junction_55976_Junction_55987	3_Junction_55976_Junction_55987	J002	0.0790238	8.41421	0.00372299	0.072296	5.90409	7.80623	0.402911	chr3R	1069976	1077144	7169	-	13	62	16	22	0.26	0.1308	0.0456	0.0584	0.1434
mtd	3_Junction_56779_Junction_56817	3_Junction_56779_Junction_56817	J001	0.0793826	7.71633	0.00547235	0.0921672	11.4532	9.76537	-0.230003	chr3R	1160782	1175188	14407	-	13	101	262	185	0.1548	0.3166	0.5137	0.5096	-0.27595
mtd	3_Junction_56779_Junction_56817	3_Junction_56779_Junction_56817	J002	0.0791618	7.73354	0.00542042	0.0917424	11.3138	12.9566	0.195602	chr3R	1162357	1175188	12832	-	71	218	248	178	0.8452	0.6834	0.4863	0.4904	0.27595
Stat92E	3_Junction_61402_Junction_61403	3_Junction_61402_Junction_61403	J001	0.0265554	3.83973	0.0500517	0.323066	7.88942	8.76201	0.151343	chr3R	16365057	16365120	64	-	20	54	64	50	0.5556	0.5243	0.3787	0.3876	0.1568
Stat92E	3_Junction_61402_Junction_61403	3_Junction_61402_Junction_61403	J002	0.0263138	3.85845	0.0494959	0.321469	9.18521	8.36554	-0.134855	chr3R	16365078	16365120	43	-	16	49	105	79	0.4444	0.4757	0.6213	0.6124	-0.1568
CaMKII	3_Junction_79444_Junction_79446	3_Junction_79444_Junction_79446	J001	0.188354	4.08078	0.0433737	0.300808	6.33373	8.25625	0.38243	chr4	1064147	1065780	1634	-	31	42	22	20	0.4133	0.1377	0.0818	0.0743	0.19745
CaMKII	3_Junction_79444_Junction_79446	3_Junction_79444_Junction_79446	J002	0.184935	4.14693	0.0417101	0.296141	13.1901	11.2842	-0.225147	chr4	1064150	1065780	1631	-	44	263	247	249	0.5867	0.8623	0.9182	0.9257	-0.19745
Arl4	3_Junction_80333_Junction_80335	3_Junction_80333_Junction_80335	J001	0.0518146	4.40479	0.0358382	0.273214	8.62423	7.45849	-0.209513	chr4	199462	199561	100	-	18	81	31	42	0.1098	0.1738	0.301	0.2428	-0.1301
Arl4	3_Junction_80333_Junction_80335	3_Junction_80333_Junction_80335	J002	0.0503283	4.49121	0.0340695	0.266043	11.5655	12.5026	0.112403	chr4	199506	199561	56	-	146	385	72	131	0.8902	0.8262	0.699	0.7572	0.1301
NONE	3_Junction_82334_Junction_82497_Junction_82500	3_Junction_82334_Junction_82497_Junction_82500	J001	0.443235	5.19647	0.0226328	0.211858	7.94553	15.3646	0.951395	chrM	11413	14616	3204	-	388	64	71	26	0.613	0.1105	0.0278	0.0509	0.3224
NONE	3_Junction_82334_Junction_82497_Junction_82500	3_Junction_82334_Junction_82497_Junction_82500	J002	0.449527	1.42252	0.23299	0.626931	17.2783	13.81	-0.323251	chrM	13350	14616	1267	-	115	430	2037	343	0.1817	0.7427	0.7988	0.6712	-0.2728
NONE	3_Junction_82334_Junction_82497_Junction_82500	3_Junction_82334_Junction_82497_Junction_82500	J003	0.0712317	0.540433	0.462253	0.804924	13.0667	12.3524	-0.0811043	chrM	13424	14616	1193	-	130	85	442	142	0.2054	0.1468	0.1733	0.2779	-0.0495
NONE	3_Junction_82427_Junction_82725	3_Junction_82427_Junction_82725	J001	0.124813	9.72888	0.00181395	0.044831	10.3139	8.31786	-0.310303	chrM	12977	15359	2383	-	31	13	67	183	0.6739	0.4643	0.8481	0.9337	-0.3218
NONE	3_Junction_82427_Junction_82725	3_Junction_82427_Junction_82725	J002	0.13135	9.36841	0.00220756	0.0512676	4.5241	6.80616	0.589211	chrM	4500	15359	10860	-	15	15	12	13	0.3261	0.5357	0.1519	0.0663	0.3218
CG1637	3_Junction_84337_Junction_84340_Junction_84346	3_Junction_84337_Junction_84340_Junction_84346	J001	0.0310648	5.32649	0.0210036	0.203206	10.0132	11.0727	0.145106	chrX	10766072	10771446	5375	-	37	181	115	92	0.6491	0.7358	0.5529	0.5287	0.15165
CG1637	3_Junction_84337_Junction_84340_Junction_84346	3_Junction_84337_Junction_84340_Junction_84346	J002	0.0928171	9.01694e-06	0.997604	0.999455	4.5043	4.66256	0.0498178	chrX	10767741	10771446	3706	-	6	9	11	11	0.1053	0.0366	0.0529	0.0632	0.0129
CG1637	3_Junction_84337_Junction_84340_Junction_84346	3_Junction_84337_Junction_84340_Junction_84346	J003	0.0240509	7.53898	0.00603782	0.0981152	9.16772	8.02476	-0.192103	chrX	10770029	10771446	1418	-	14	56	82	71	0.2456	0.2276	0.3942	0.408	-0.1645
Rbp1-like	3_Junction_87154_Junction_87184	3_Junction_87154_Junction_87184	J001	0.0306299	47.2962	6.10304e-12	4.18353e-09	11.8005	8.53729	-0.467003	chrX	13275076	13278331	3256	-	22	50	261	163	0.0655	0.0522	0.3325	0.2753	-0.24505
Rbp1-like	3_Junction_87154_Junction_87184	3_Junction_87154_Junction_87184	J002	0.0302921	47.723	4.90903e-12	3.4811e-09	14.2436	16.8438	0.241912	chrX	13277656	13278331	676	-	314	907	524	429	0.9345	0.9478	0.6675	0.7247	0.24505
mmd	3_Junction_92151_Junction_92156	3_Junction_92151_Junction_92156	J001	0.102396	4.35679	0.0368616	0.277976	10.2292	8.80899	-0.215642	chrX	15843909	15845181	1273	-	25	78	124	74	0.5	0.4239	0.7949	0.6016	-0.2363
mmd	3_Junction_92151_Junction_92156	3_Junction_92151_Junction_92156	J002	0.10298	4.33528	0.0373304	0.279345	7.83675	9.29271	0.245843	chrX	15844418	15845181	764	-	25	106	32	49	0.5	0.5761	0.2051	0.3984	0.2363
CoVIb	3_Junction_97379_Junction_97383_Junction_97388	3_Junction_97379_Junction_97383_Junction_97388	J001	0.0276383	5.36834	0.0205055	0.200183	12.8436	12.0202	-0.0955892	chrX	19635198	19638293	3096	-	68	260	254	225	0.3063	0.2564	0.4387	0.382	-0.129
CoVIb	3_Junction_97379_Junction_97383_Junction_97388	3_Junction_97379_Junction_97383_Junction_97388	J002	0.0434932	0.069214	0.792485	0.944588	11.7078	11.8048	0.0119049	chrX	19635201	19638293	3093	-	71	221	159	166	0.3198	0.2179	0.2746	0.2818	-0.00935
CoVIb	3_Junction_97379_Junction_97383_Junction_97388	3_Junction_97379_Junction_97383_Junction_97388	J003	0.0604443	2.78105	0.0953856	0.433063	12.0552	13.5499	0.168629	chrX	19635235	19638293	3059	-	83	533	166	198	0.3739	0.5256	0.2867	0.3362	0.1383
SK	5_Junction_105537_Junction_105538	5_Junction_105537_Junction_105538	J001	0.101204	6.63118	0.0100209	0.132567	9.14945	7.29116	-0.327538	chrX	5277679	5282273	4595	+	10	54	58	74	0.1639	0.3673	0.5686	0.5781	-0.30775
SK	5_Junction_105537_Junction_105538	5_Junction_105537_Junction_105538	J002	0.100357	6.6734	0.00978625	0.130724	8.32982	10.13	0.282279	chrX	5277679	5288084	10406	+	51	93	44	54	0.8361	0.6327	0.4314	0.4219	0.30775
pog	5_Junction_11547_Junction_11548	5_Junction_11547_Junction_11548	J001	0.0621995	6.92836	0.00848396	0.121212	7.98486	9.52265	0.254095	chr2L	4872693	4873816	1124	+	45	140	27	35	0.4945	0.4281	0.1731	0.2917	0.2289
pog	5_Junction_11547_Junction_11548	5_Junction_11547_Junction_11548	J002	0.0616598	6.97554	0.00826314	0.119074	11.4208	10.0099	-0.190236	chr2L	4872693	4873870	1178	+	46	187	129	85	0.5055	0.5719	0.8269	0.7083	-0.2289
PDZ-GEF	5_Junction_12760_Junction_12761	5_Junction_12760_Junction_12761	J001	0.106382	4.73435	0.029566	0.245959	10.1953	8.76759	-0.217648	chr2L	6330886	6331042	157	+	78	110	41	43	0.7429	0.8594	0.9762	0.9149	-0.1444
PDZ-GEF	5_Junction_12760_Junction_12761	5_Junction_12760_Junction_12761	J002	0.112111	4.60399	0.0318977	0.257138	3.5922	5.4828	0.610047	chr2L	6330886	6331045	160	+	27	18	1	4	0.2571	0.1406	0.0238	0.0851	0.1444
CG11266	5_Junction_13357_Junction_13360	5_Junction_13357_Junction_13360	J001	0.170459	8.1775	0.00424131	0.0791115	12.2658	9.91179	-0.30742	chr2L	7033018	7034197	1180	+	25	227	141	154	0.463	0.7774	0.9216	0.9222	-0.3017
CG11266	5_Junction_13357_Junction_13360	5_Junction_13357_Junction_13360	J002	0.173534	8.05694	0.00453298	0.0828334	5.62441	8.03271	0.514186	chr2L	7033018	7035073	2056	+	29	65	12	13	0.537	0.2226	0.0784	0.0778	0.3017
dpr	5_Junction_21999_Junction_22000	5_Junction_21999_Junction_22000	J001	0.119215	12.6139	0.000382883	0.0153935	6.26229	9.58455	0.614021	chr2R	16621444	16631681	10238	+	53	11	30	24	0.6625	0.44	0.2041	0.1076	0.3954
dpr	5_Junction_21999_Junction_22000	5_Junction_21999_Junction_22000	J002	0.117684	12.7535	0.000355347	0.0146885	11.0814	7.87887	-0.492082	chr2R	16621444	16637187	15744	+	27	14	117	199	0.3375	0.56	0.7959	0.8924	-0.3954
MESK2	5_Junction_22710_Junction_22712_Junction_22714	5_Junction_22710_Junction_22712_Junction_22714	J001	0.0902962	3.4698	0.0624987	0.35892	15.8037	13.9011	-0.185067	chr2R	17399682	17401020	1339	+	37	614	785	776	0.4512	0.6674	0.7788	0.7314	-0.1958
MESK2	5_Junction_22710_Junction_22712_Junction_22714	5_Junction_22710_Junction_22712_Junction_22714	J002	0.237642	0.342418	0.558437	0.855788	11.4332	10.3996	-0.136707	chr2R	17399682	17401712	2031	+	35	113	138	220	0.4268	0.1228	0.1369	0.2074	0.10265
MESK2	5_Junction_22710_Junction_22712_Junction_22714	5_Junction_22710_Junction_22712_Junction_22714	J003	0.0590159	6.66991	0.00980539	0.130828	8.88462	10.5908	0.253435	chr2R	17399682	17403391	3710	+	10	193	85	65	0.122	0.2098	0.0843	0.0613	0.0931
NaCP60E	5_Junction_25689_Junction_25690	5_Junction_25689_Junction_25690	J001	0.1222	9.64273	0.00190102	0.0462646	2.76614	5.33738	0.948258	chr2R	20794796	20795656	861	+	10	10	4	3	0.4167	0.1852	0.0506	0.0405	0.2554
NaCP60E	5_Junction_25689_Junction_25690	5_Junction_25689_Junction_25690	J002	0.107354	10.3399	0.00130188	0.0356002	9.22666	7.43977	-0.31055	chr2R	20794796	20796000	1205	+	14	44	75	71	0.5833	0.8148	0.9494	0.9595	-0.2554
Nplp1	5_Junction_25895_Junction_25896	5_Junction_25895_Junction_25896	J001	0.0475827	16.8695	4.00405e-05	0.00286903	8.1262	10.34	0.347587	chr2R	20925053	20925223	171	+	15	187	49	50	0.4688	0.3175	0.1263	0.1031	0.27845
Nplp1	5_Junction_25895_Junction_25896	5_Junction_25895_Junction_25896	J002	0.0465683	17.1241	3.50161e-05	0.0026043	14.0916	12.2217	-0.205398	chr2R	20925053	20926572	1520	+	17	402	339	435	0.5312	0.6825	0.8737	0.8969	-0.27845
koi	5_Junction_26369_Junction_26370	5_Junction_26369_Junction_26370	J001	0.067997	14.5534	0.000136245	0.00704856	9.14066	10.9055	0.254682	chr2R	2701258	2701540	283	+	104	121	55	44	0.9811	0.9453	0.7333	0.8148	0.18915
koi	5_Junction_26369_Junction_26370	5_Junction_26369_Junction_26370	J002	0.0809415	13.2483	0.000272831	0.0120142	6.04713	2.94741	-1.0368	chr2R	2701258	2702563	1306	+	2	7	20	10	0.0189	0.0547	0.2667	0.1852	-0.18915
NONE	5_Junction_30477_Junction_30489_Junction_30497	5_Junction_30477_Junction_30489_Junction_30497	J001	0.122371	5.07025	0.0243399	0.219225	4.67291	7.93597	0.764086	chr2R	5929125	5929172	48	+	218	99	1	2	0.6708	0.4806	0.1	0.3333	0.35905
NONE	5_Junction_30477_Junction_30489_Junction_30497	5_Junction_30477_Junction_30489_Junction_30497	J002	0.0826678	0.0879212	0.766837	0.935228	4.66059	4.98625	0.0974442	chr2R	5929125	5929988	864	+	57	58	2	1	0.1754	0.2816	0.2	0.1667	0.04515
NONE	5_Junction_30477_Junction_30489_Junction_30497	5_Junction_30477_Junction_30489_Junction_30497	J003	0.0750449	8.74162	0.00311028	0.0644445	7.40622	4.67598	-0.663469	chr2R	5929125	5930609	1485	+	50	49	7	3	0.1538	0.2379	0.7	0.5	-0.40415
egr	5_Junction_30966_Junction_30967	5_Junction_30966_Junction_30967	J001	0.0544131	4.27258	0.038732	0.284873	7.43484	6.28592	-0.242177	chr2R	5970831	5970907	77	+	25	27	10	33	0.5102	0.5094	0.625	0.8049	-0.20515
egr	5_Junction_30966_Junction_30967	5_Junction_30966_Junction_30967	J002	0.0557936	4.21374	0.0400978	0.290195	4.80107	6.18902	0.366353	chr2R	5970831	5970925	95	+	24	26	6	8	0.4898	0.4906	0.375	0.1951	0.20515
NONE	5_Junction_39730_Junction_39731	5_Junction_39730_Junction_39731	J001	0.0499106	7.41677	0.00646189	0.10218	9.50654	8.64352	-0.137301	chr3L	15028615	15031242	2628	+	44	87	75	29	0.8148	0.8529	0.9615	0.9667	-0.13025
NONE	5_Junction_39730_Junction_39731	5_Junction_39730_Junction_39731	J002	0.059288	6.9939	0.00817882	0.118571	2.63787	4.63955	0.814611	chr3L	15028615	15032717	4103	+	10	15	3	1	0.1852	0.1471	0.0385	0.0333	0.13025
CG33158	5_Junction_40897_Junction_40898	5_Junction_40897_Junction_40898	J001	0.166233	8.64832	0.00327363	0.0665551	5.9388	8.23474	0.471552	chr3L	16434574	16451893	17320	+	19	15	15	52	0.8636	0.9375	0.3191	0.6047	0.43865
CG33158	5_Junction_40897_Junction_40898	5_Junction_40897_Junction_40898	J002	0.170384	8.52344	0.00350602	0.0695158	5.83618	3.31594	-0.815606	chr3L	16434574	16626301	191728	+	3	1	32	34	0.1364	0.0625	0.6809	0.3953	-0.43865
Shab	5_Junction_47442_Junction_47444	5_Junction_47442_Junction_47444	J001	0.0590658	6.13864	0.0132259	0.156044	8.0842	9.52788	0.237051	chr3L	2941624	2944021	2398	+	15	141	56	37	0.5769	0.7382	0.4	0.4805	0.2173
Shab	5_Junction_47442_Junction_47444	5_Junction_47442_Junction_47444	J002	0.0595181	6.09821	0.0135319	0.158562	8.83959	7.32085	-0.271969	chr3L	2941624	2947875	6252	+	11	50	84	40	0.4231	0.2618	0.6	0.5195	-0.2173
cry	5_Junction_60431_Junction_60432	5_Junction_60431_Junction_60432	J001	0.0365477	14.2449	0.000160492	0.00801076	7.64619	4.15952	-0.878325	chr3R	15038204	15038279	76	+	5	1	70	98	0.0515	0.0417	0.2188	0.2481	-0.18685
cry	5_Junction_60431_Junction_60432	5_Junction_60431_Junction_60432	J002	0.0350865	14.4958	0.000140471	0.00723082	10.9165	12.7623	0.225372	chr3R	15038204	15039204	1001	+	92	23	250	297	0.9485	0.9583	0.7812	0.7519	0.18685
Nrx-1	5_Junction_63340_Junction_63341	5_Junction_63340_Junction_63341	J001	0.0390089	7.67831	0.00558884	0.0933645	10.6496	11.8072	0.148862	chr3R	18306848	18307562	715	+	36	317	109	117	0.6792	0.5601	0.3682	0.4021	0.2345
Nrx-1	5_Junction_63340_Junction_63341	5_Junction_63340_Junction_63341	J002	0.0389666	7.68414	0.00557081	0.0931769	12.0088	10.8628	-0.1447	chr3R	18306848	18308567	1720	+	17	249	187	174	0.3208	0.4399	0.6318	0.5979	-0.2345
klg	5_Junction_64033_Junction_64034	5_Junction_64033_Junction_64034	J001	0.04589	29.4902	5.62005e-08	1.35969e-05	3.21623	6.78149	1.07623	chr3R	18741358	18762214	20857	+	16	19	6	5	0.5	0.4634	0.0732	0.0581	0.41605
klg	5_Junction_64033_Junction_64034	5_Junction_64033_Junction_64034	J002	0.0420795	30.6096	3.15521e-08	8.62589e-06	9.07952	6.93355	-0.389022	chr3R	18741358	18774397	33040	+	16	22	76	81	0.5	0.5366	0.9268	0.9419	-0.41605
CG31140	5_Junction_65062_Junction_65063	5_Junction_65062_Junction_65063	J001	0.0256036	54.7145	1.39375e-13	1.27386e-10	14.4575	11.7882	-0.294483	chr3R	19805344	19806248	905	+	42	360	378	327	0.5526	0.5106	0.9043	0.8862	-0.36365
CG31140	5_Junction_65062_Junction_65063	5_Junction_65062_Junction_65063	J002	0.0259368	54.1879	1.82202e-13	1.62908e-10	8.22842	11.5639	0.490944	chr3R	19805344	19807446	2103	+	34	345	40	42	0.4474	0.4894	0.0957	0.1138	0.36365
mld	5_Junction_65701_Junction_65704_Junction_65715	5_Junction_65701_Junction_65704_Junction_65715	J001	0.441397	0.0705986	0.790467	0.943732	4.38754	3.88484	-0.175559	chr3R	20250821	20255036	4216	+	1	6	17	17	0.0051	0.1154	0.027	0.022	0.03575
mld	5_Junction_65701_Junction_65704_Junction_65715	5_Junction_65701_Junction_65704_Junction_65715	J002	0.113667	10.3683	0.00128194	0.0353507	9.31022	13.616	0.548413	chr3R	20250821	20268606	17786	+	133	21	133	131	0.6717	0.4038	0.2111	0.1697	0.34735
mld	5_Junction_65701_Junction_65704_Junction_65715	5_Junction_65701_Junction_65704_Junction_65715	J003	0.0558702	21.8039	3.01988e-06	0.000343107	13.5138	11.3844	-0.247369	chr3R	20250821	20434939	184119	+	64	25	480	624	0.3232	0.4808	0.7619	0.8083	-0.3831
scrib	5_Junction_67654_Junction_67655	5_Junction_67654_Junction_67655	J001	0.0526223	6.43313	0.0112011	0.141014	5.88453	7.33287	0.31745	chr3R	22405003	22405159	157	+	27	19	23	15	0.7941	0.6786	0.4894	0.4167	0.2833
scrib	5_Junction_67654_Junction_67655	5_Junction_67654_Junction_67655	J002	0.0551453	6.29378	0.0121163	0.147611	6.28983	4.54205	-0.469677	chr3R	22405003	22405364	362	+	7	9	24	21	0.2059	0.3214	0.5106	0.5833	-0.2833
Tomosyn	5_Junction_86181_Junction_86183	5_Junction_86181_Junction_86183	J001	0.150823	3.95454	0.0467451	0.313993	6.02941	7.64392	0.342297	chrX	12534872	12537904	3033	+	15	28	27	28	0.5769	0.2478	0.1385	0.1657	0.26025
Tomosyn	5_Junction_86181_Junction_86183	5_Junction_86181_Junction_86183	J002	0.146653	4.03641	0.0445285	0.305439	10.5894	9.05585	-0.225692	chrX	12534872	12542568	7697	+	11	85	168	141	0.4231	0.7522	0.8615	0.8343	-0.26025
rdgB	5_Junction_87800_Junction_87801	5_Junction_87800_Junction_87801	J001	0.128369	5.07017	0.0243411	0.219225	8.10101	9.56485	0.239641	chrX	13668011	13669464	1454	+	14	124	55	53	0.4516	0.2016	0.0873	0.1265	0.2197
rdgB	5_Junction_87800_Junction_87801	5_Junction_87800_Junction_87801	J002	0.126438	5.12838	0.0235376	0.215944	14.3236	12.9178	-0.149034	chrX	13668011	13670004	1994	+	17	491	575	366	0.5484	0.7984	0.9127	0.8735	-0.2197

## Sheet: AS intron retention events
Gene	AS_event_ID	AS_structure_ID	sub_junction_ID	sub-junction_dispersion_estimate	LRT_statistic-full_vs_reduced	LRT_p_value-full_vs_reduced	BH_adjusted_p-values	DN1	TH	fitting_parameter_log2fold_change_TH_DN1	sub_junction_chr	sub_junction_start_coor	sub_junction_end_coor	sub_junction_size	sub_junction_strand	raw_count.IndexA	raw_count.IndexB	raw_count.IndexC	raw_count.IndexD	percentage_usage.IndexA	percentage_usage.IndexB	percentage_usage.IndexC	percentage_usage.IndexD	deltaPSI
RpS21	intronretention_Junction_10093	intronretentionleft-Junction_10093	J001	0.0103635	26.3042	2.91646e-07	5.06123e-05	20.5646	19.3736	-0.0860712	chr2L	2856568	2856629	62	+	886	1100	4422	4028	0.3133	0.3132	0.4807	0.5057
RpS21	intronretention_Junction_10093	intronretentionleft-Junction_10093	J002	0.0103611	26.3101	2.90767e-07	5.06123e-05	20.6492	21.8232	0.0797793	chr2L	2856496	2856616	121	+	1942	2412	4778	3937	0.6867	0.6868	0.5193	0.4943
RpS21	intronretention_Junction_10093	intronretentionright-Junction_10093	J001	0.0836306	31.6009	1.89344e-08	5.77784e-06	22.0201	17.9865	-0.291903	chr2L	2856568	2856629	62	+	886	1100	4422	4028	0.2549	0.4327	0.8563	0.8402
RpS21	intronretention_Junction_10093	intronretentionright-Junction_10093	J002	0.083639	31.5977	1.89649e-08	5.77784e-06	16.7488	20.7877	0.31167	chr2L	2856582	2856704	123	+	2590	1442	742	766	0.7451	0.5673	0.1437	0.1598	-0.183419
RhoGAP1A	intronretention_Junction_103044	intronretentionleft-Junction_103044	J001	0.0194149	6.38919	0.0114817	0.142643	10.9126	9.94345	-0.134175	chrX	36167	36236	70	+	37	109	141	121	0.2803	0.3011	0.442	0.4187
RhoGAP1A	intronretention_Junction_103044	intronretentionleft-Junction_103044	J002	0.0192409	6.42841	0.0112309	0.141086	11.7337	12.5612	0.0983235	chrX	36098	36215	118	+	95	253	178	168	0.7197	0.6989	0.558	0.5813
RhoGAP1A	intronretention_Junction_103044	intronretentionright-Junction_103044	J001	0.0447545	7.48325	0.00622755	0.0997953	11.0941	9.7868	-0.18089	chrX	36167	36236	70	+	37	109	141	121	0.4458	0.5561	0.698	0.7562
RhoGAP1A	intronretention_Junction_103044	intronretentionright-Junction_103044	J002	0.0451727	7.43377	0.00640111	0.101644	8.35958	9.78666	0.227387	chrX	36189	36296	108	+	46	87	61	39	0.5542	0.4439	0.302	0.2438	-0.151286
NONE	intronretention_Junction_109504	intronretentionleft-Junction_109504	J001	0.070402	10.7021	0.00107013	0.0309043	11.4502	13.6738	0.256042	chrX	8287	8344	58	-	569	483	49	58	0.7095	0.5552	0.3427	0.2974
NONE	intronretention_Junction_109504	intronretentionleft-Junction_109504	J002	0.0705227	10.6856	0.00107974	0.031055	13.7615	11.5369	-0.25438	chrX	8224	8335	112	-	233	387	94	137	0.2905	0.4448	0.6573	0.7026
NONE	intronretention_Junction_109504	intronretentionright-Junction_109504	J001	0.128963	6.02768	0.0140833	0.162113	11.4556	13.6819	0.256212	chrX	8287	8344	58	-	569	483	49	58	0.8621	0.6871	0.4495	0.537
NONE	intronretention_Junction_109504	intronretentionright-Junction_109504	J002	0.129664	5.99775	0.0143241	0.16374	11.5061	9.2487	-0.31508	chrX	8297	8407	111	-	91	220	60	50	0.1379	0.3129	0.5505	0.463	0.287553
AP-2alpha	intronretention_Junction_10953	intronretentionleft-Junction_10953	J001	0.0391771	8.64844	0.00327341	0.0665551	11.5208	10.1294	-0.185695	chr2L	410073	410125	53	-	25	187	143	132	0.5814	0.4795	0.7647	0.7135
AP-2alpha	intronretention_Junction_10953	intronretentionleft-Junction_10953	J002	0.0396135	8.56982	0.0034178	0.068614	8.57434	10.1127	0.238073	chr2L	410001	410121	121	-	18	203	44	53	0.4186	0.5205	0.2353	0.2865
AP-2alpha	intronretention_Junction_10953	intronretentionright-Junction_10953	J001	0.0380591	10.7326	0.00105262	0.0305896	11.5384	10.1154	-0.189894	chr2L	410073	410125	53	-	25	187	143	132	0.6098	0.5807	0.7857	0.8462
AP-2alpha	intronretention_Junction_10953	intronretentionright-Junction_10953	J002	0.0389617	10.5559	0.00115819	0.0326717	7.41094	9.15797	0.30537	chr2L	410078	410195	118	-	16	135	39	24	0.3902	0.4193	0.2143	0.1538	-0.158
NONE	intronretention_Junction_110540	intronretentionleft-Junction_110540	J001	0.0637298	16.2118	5.66396e-05	0.00364559	6.64362	9.16341	0.463915	chrX	8709	8775	67	-	73	141	14	11	0.6404	0.5018	0.209	0.1642
NONE	intronretention_Junction_110540	intronretentionleft-Junction_110540	J002	0.0637075	16.2158	5.6522e-05	0.00364372	10.6389	8.32348	-0.354096	chrX	8644	8757	114	-	41	140	53	56	0.3596	0.4982	0.791	0.8358
NONE	intronretention_Junction_110540	intronretentionright-Junction_110540	J001	0.0355711	8.19848	0.00419255	0.078451	7.15088	8.56406	0.260174	chrX	8709	8775	67	-	73	141	14	11	0.7228	0.7231	0.4	0.5238
NONE	intronretention_Junction_110540	intronretentionright-Junction_110540	J002	0.0368588	8.06008	0.00452512	0.0827908	7.68837	6.04617	-0.346656	chrX	8728	8840	113	-	28	54	21	10	0.2772	0.2769	0.6	0.4762	0.410632
l(2)k05819	intronretention_Junction_11133	intronretentionleft-Junction_11133	J001	0.0435204	17.2216	3.32635e-05	0.00251488	13.6779	11.8207	-0.210526	chr2L	4399600	4399659	60	+	85	308	291	202	0.5667	0.6754	0.8818	0.8596
l(2)k05819	intronretention_Junction_11133	intronretentionleft-Junction_11133	J002	0.0440309	17.0661	3.61013e-05	0.00265619	8.15387	10.341	0.34282	chr2L	4399527	4399648	122	+	65	148	39	33	0.4333	0.3246	0.1182	0.1404
l(2)k05819	intronretention_Junction_11133	intronretentionright-Junction_11133	J001	0.0326964	7.85126	0.00507854	0.0877997	13.2818	12.2137	-0.12095	chr2L	4399600	4399659	60	+	85	308	291	202	0.6489	0.6247	0.7698	0.8279
l(2)k05819	intronretention_Junction_11133	intronretentionright-Junction_11133	J002	0.0331117	7.77511	0.00529709	0.0902503	9.3541	10.6051	0.18109	chr2L	4399612	4399727	116	+	46	185	87	42	0.3511	0.3753	0.2302	0.1721	-0.165998
CG31650	intronretention_Junction_11784	intronretentionleft-Junction_11784	J001	0.0210704	10.642	0.00110548	0.0315964	13.5035	12.395	-0.12358	chr2L	5042890	5042959	70	-	162	343	184	199	0.4602	0.4397	0.6073	0.6611
CG31650	intronretention_Junction_11784	intronretentionleft-Junction_11784	J002	0.0210753	10.6401	0.00110665	0.0316067	11.8467	12.9895	0.132856	chr2L	5042822	5042938	117	-	190	437	119	102	0.5398	0.5603	0.3927	0.3389
CG31650	intronretention_Junction_11784	intronretentionright-Junction_11784	J001	0.019299	17.1767	3.40585e-05	0.00255154	13.6459	12.2485	-0.155864	chr2L	5042890	5042959	70	-	162	343	184	199	0.4143	0.4455	0.6389	0.6746
CG31650	intronretention_Junction_11784	intronretentionright-Junction_11784	J002	0.0192928	17.1809	3.39833e-05	0.00255054	11.6974	13.1408	0.167865	chr2L	5042912	5043031	120	-	229	427	104	96	0.5857	0.5545	0.3611	0.3254	-0.155216
frj	intronretention_Junction_12841	intronretentionleft-Junction_12841	J001	0.0571215	10.3314	0.00130786	0.0356468	9.79215	8.08561	-0.276269	chr2L	6458095	6458169	75	+	23	100	55	59	0.371	0.4926	0.7051	0.7867
frj	intronretention_Junction_12841	intronretentionleft-Junction_12841	J002	0.0573975	10.2986	0.0013313	0.0359993	6.89315	8.73829	0.342188	chr2L	6458052	6458143	92	+	39	103	23	16	0.629	0.5074	0.2949	0.2133
frj	intronretention_Junction_12841	intronretentionright-Junction_12841	J001	0.157168	6.92019	0.00852277	0.121544	10.1185	7.75605	-0.383604	chr2L	6458095	6458169	75	+	23	100	55	59	0.142	0.361	0.6627	0.5566
frj	intronretention_Junction_12841	intronretentionright-Junction_12841	J002	0.155886	6.97008	0.0082884	0.119277	8.97574	11.3137	0.333962	chr2L	6458122	6458220	99	+	139	177	28	47	0.858	0.639	0.3373	0.4434	-0.253211
CG9548	intronretention_Junction_12884	intronretentionleft-Junction_12884	J001	0.133904	9.89211	0.00165989	0.0421939	11.1279	8.19611	-0.441173	chr2L	6490222	6490286	65	-	39	44	83	119	0.269	0.4731	0.6975	0.838
CG9548	intronretention_Junction_12884	intronretentionleft-Junction_12884	J002	0.133808	9.89843	0.00165419	0.0421011	7.63538	10.578	0.470291	chr2L	6490162	6490270	109	-	106	49	36	23	0.731	0.5269	0.3025	0.162
CG9548	intronretention_Junction_12884	intronretentionright-Junction_12884	J001	0.0683324	9.84422	0.00170366	0.0428038	10.6021	8.58918	-0.303761	chr2L	6490222	6490286	65	-	39	44	83	119	0.2826	0.3212	0.5253	0.6919
CG9548	intronretention_Junction_12884	intronretentionright-Junction_12884	J002	0.0680767	9.87488	0.0016755	0.0425119	9.24782	11.2132	0.278015	chr2L	6490239	6490359	121	-	99	93	75	53	0.7174	0.6788	0.4747	0.3081	-0.333705
CG4495	intronretention_Junction_13446	intronretentionleft-Junction_13446	J001	0.23455	4.86926	0.0273393	0.235256	10.203	7.69523	-0.406963	chr2L	7184394	7184613	220	+	21	81	83	54	0.2958	0.6639	0.883	0.7714
CG4495	intronretention_Junction_13446	intronretentionleft-Junction_13446	J002	0.235652	4.84929	0.0276576	0.236752	5.99237	8.46915	0.499091	chr2L	7184359	7184442	84	+	50	41	11	16	0.7042	0.3361	0.117	0.2286
CG4495	intronretention_Junction_13446	intronretentionright-Junction_13446	J001	0.0256358	15.956	6.48315e-05	0.00400368	9.80346	8.11288	-0.273077	chr2L	7184394	7184613	220	+	21	81	83	54	0.3231	0.3152	0.6194	0.587
CG4495	intronretention_Junction_13446	intronretentionright-Junction_13446	J002	0.0254264	16.0376	6.20982e-05	0.00389632	8.61287	10.2099	0.245408	chr2L	7184566	7184680	115	+	44	176	51	38	0.6769	0.6848	0.3806	0.413	-0.277135
ico	intronretention_Junction_13485	intronretentionleft-Junction_13485	J001	0.0241659	18.1617	2.02919e-05	0.00176073	12.9485	11.5412	-0.165996	chr2L	7220677	7220740	64	-	42	271	226	251	0.7	0.6931	0.8828	0.8901
ico	intronretention_Junction_13485	intronretentionleft-Junction_13485	J002	0.0249809	17.7805	2.47908e-05	0.00204744	7.14617	9.26179	0.374121	chr2L	7220612	7220725	114	-	18	120	30	31	0.3	0.3069	0.1172	0.1099
ico	intronretention_Junction_13485	intronretentionright-Junction_13485	J001	0.0361171	12.5364	0.000399096	0.0157924	12.9572	11.4982	-0.172347	chr2L	7220677	7220740	64	-	42	271	226	251	0.4667	0.5766	0.7584	0.7819
ico	intronretention_Junction_13485	intronretentionright-Junction_13485	J002	0.0364338	12.4553	0.000416813	0.0162803	9.41603	11.0387	0.229375	chr2L	7220693	7220811	119	-	48	199	72	70	0.5333	0.4234	0.2416	0.2181	-0.118669
tai	intronretention_Junction_15153	intronretentionleft-Junction_15153	J001	0.0757169	6.17211	0.012978	0.154725	4.9551	2.75764	-0.845481	chr2L	9176461	9177123	663	+	3	2	11	15	0.0353	0.0177	0.0815	0.1316
tai	intronretention_Junction_15153	intronretentionleft-Junction_15153	J002	0.0616269	6.76523	0.00929507	0.127136	10.3816	11.4068	0.135876	chr2L	9176413	9176509	97	+	82	111	124	99	0.9647	0.9823	0.9185	0.8684
tai	intronretention_Junction_15153	intronretentionright-Junction_15153	J001	0.0626352	14.5776	0.000134501	0.00699355	5.76059	2.29929	-1.32503	chr2L	9176461	9177123	663	+	3	2	11	15	0.0132	0.0136	0.0866	0.1261
tai	intronretention_Junction_15153	intronretentionright-Junction_15153	J002	0.0506346	15.9638	6.45657e-05	0.00399928	11.4393	12.8174	0.164102	chr2L	9177076	9177168	93	+	225	145	116	104	0.9868	0.9864	0.9134	0.8739	-0.140139
Nckx30C	intronretention_Junction_15584	intronretentionleft-Junction_15584	J001	0.260392	4.31866	0.0376966	0.280445	14.3259	12.4225	-0.205676	chr2L	9718006	9718264	259	-	25	497	412	344	0.2717	0.702	0.8443	0.8152
Nckx30C	intronretention_Junction_15584	intronretentionleft-Junction_15584	J002	0.261346	4.30389	0.0380254	0.281792	9.66193	11.5455	0.256947	chr2L	9717942	9718054	113	-	67	211	76	78	0.7283	0.298	0.1557	0.1848
Nckx30C	intronretention_Junction_15584	intronretentionright-Junction_15584	J001	0.0343073	4.01791	0.0450195	0.307525	13.8227	13.0785	-0.079848	chr2L	9718006	9718264	259	-	25	497	412	344	0.4902	0.6143	0.7067	0.7122
Nckx30C	intronretention_Junction_15584	intronretentionright-Junction_15584	J002	0.034591	3.9965	0.0455948	0.309715	11.1722	11.9746	0.100065	chr2L	9718217	9718334	118	-	26	312	171	139	0.5098	0.3857	0.2933	0.2878	-0.280741
FKBP59	intronretention_Junction_15849	intronretentionleft-Junction_15849	J001	0.0315064	7.08889	0.00775633	0.115041	12.662	11.5961	-0.126865	chr2L	9888787	9888845	59	+	30	241	314	220	0.5085	0.5579	0.7476	0.6875
FKBP59	intronretention_Junction_15849	intronretentionleft-Junction_15849	J002	0.0317505	7.0488	0.00793183	0.11647	9.90595	11.0808	0.161697	chr2L	9888714	9888835	122	+	29	191	106	100	0.4915	0.4421	0.2524	0.3125
FKBP59	intronretention_Junction_15849	intronretentionright-Junction_15849	J001	0.106348	21.0516	4.4708e-06	0.000476371	13.6914	10.487	-0.384675	chr2L	9888787	9888845	59	+	30	241	314	220	0.2308	0.4471	0.8464	0.8209
FKBP59	intronretention_Junction_15849	intronretentionright-Junction_15849	J002	0.106621	21.0031	4.58552e-06	0.000484827	8.97349	12.2243	0.446016	chr2L	9888798	9888915	118	+	100	298	57	48	0.7692	0.5529	0.1536	0.1791	-0.140024
CG12567	intronretention_Junction_16068	intronretentionleft-Junction_16068	J001	0.041907	5.53143	0.0186779	0.189478	12.6246	11.6373	-0.117474	chr2LHet	20650	20721	72	-	31	304	231	217	0.5439	0.6741	0.7752	0.7978
CG12567	intronretention_Junction_16068	intronretentionleft-Junction_16068	J002	0.0425602	5.47492	0.0192913	0.193119	8.86153	9.99957	0.174311	chr2LHet	20580	20698	119	-	26	147	67	55	0.4561	0.3259	0.2248	0.2022
CG12567	intronretention_Junction_16068	intronretentionright-Junction_16068	J001	0.254213	4.45929	0.034712	0.268561	13.1776	10.9793	-0.263293	chr2LHet	20650	20721	72	-	31	304	231	217	0.3875	0.7876	0.9094	0.868
CG12567	intronretention_Junction_16068	intronretentionright-Junction_16068	J002	0.256349	4.42507	0.0354148	0.271597	7.32619	9.47756	0.371452	chr2LHet	20674	20774	101	-	49	82	23	33	0.6125	0.2124	0.0906	0.132	-0.125514
Atf6	intronretention_Junction_16544	intronretentionleft-Junction_16544	J001	0.140427	7.3964	0.00653547	0.103168	8.73837	6.11603	-0.514769	chr2R	1035939	1035993	55	+	14	35	45	36	0.0532	0.1584	0.3814	0.3025
Atf6	intronretention_Junction_16544	intronretentionleft-Junction_16544	J002	0.137091	7.55076	0.00599849	0.0976304	10.617	13.1043	0.303663	chr2R	1035896	1035987	92	+	249	186	73	83	0.9468	0.8416	0.6186	0.6975
Atf6	intronretention_Junction_16544	intronretentionright-Junction_16544	J001	0.120379	7.62285	0.00576332	0.095082	8.66554	6.17223	-0.489498	chr2R	1035939	1035993	55	+	14	35	45	36	0.0565	0.1528	0.3571	0.2927
Atf6	intronretention_Junction_16544	intronretentionright-Junction_16544	J002	0.117337	7.78819	0.00525888	0.0897478	10.7489	13.0522	0.280097	chr2R	1035946	1036063	118	+	234	194	81	87	0.9435	0.8472	0.6429	0.7073	-0.321071
Trpm	intronretention_Junction_17197	intronretentionleft-Junction_17197	J001	0.124383	6.58448	0.0102872	0.134467	6.58197	8.52828	0.373736	chr2R	11157948	11158134	187	-	28	66	21	25	0.8	0.7021	0.28	0.5319
Trpm	intronretention_Junction_17197	intronretentionleft-Junction_17197	J002	0.126023	6.51897	0.010673	0.137435	7.78167	5.77234	-0.430925	chr2R	11157885	11157996	112	-	7	28	54	22	0.2	0.2979	0.72	0.4681
Trpm	intronretention_Junction_17197	intronretentionright-Junction_17197	J001	0.0347007	26.7897	2.26845e-07	4.05648e-05	6.32816	8.734	0.464856	chr2R	11157948	11158134	187	-	28	66	21	25	0.7568	0.7952	0.3333	0.3205
Trpm	intronretention_Junction_17197	intronretentionright-Junction_17197	J002	0.0351302	26.6199	2.47677e-07	4.39083e-05	8.17571	5.49773	-0.572507	chr2R	11158087	11158196	110	-	9	17	42	53	0.2432	0.2048	0.6667	0.6795	0.290972
Ext2	intronretention_Junction_18010	intronretentionleft-Junction_18010	J001	0.0279496	7.8933	0.00496182	0.0868532	11.4937	10.4332	-0.139659	chr2R	12034606	12034669	64	-	35	230	140	99	0.5645	0.5721	0.7292	0.7795
Ext2	intronretention_Junction_18010	intronretentionleft-Junction_18010	J002	0.0283455	7.82155	0.0051627	0.0887695	8.38404	9.6546	0.203571	chr2R	12034536	12034654	119	-	27	172	52	28	0.4355	0.4279	0.2708	0.2205
Ext2	intronretention_Junction_18010	intronretentionright-Junction_18010	J001	0.038954	10.6741	0.00108645	0.0311825	11.6565	10.2429	-0.186504	chr2R	12034606	12034669	64	-	35	230	140	99	0.3977	0.5066	0.7071	0.7174
Ext2	intronretention_Junction_18010	intronretentionright-Junction_18010	J002	0.0391143	10.6431	0.00110484	0.0315964	9.07137	10.584	0.222492	chr2R	12034622	12034741	120	-	53	224	58	39	0.6023	0.4934	0.2929	0.2826	-0.134991
Dek	intronretention_Junction_18832	intronretentionleft-Junction_18832	J001	0.0355813	8.05486	0.00453817	0.0828334	13.4575	12.2788	-0.132243	chr2R	12746902	12746956	55	+	48	274	348	354	0.4248	0.5112	0.6444	0.7038
Dek	intronretention_Junction_18832	intronretentionleft-Junction_18832	J002	0.0356951	8.03438	0.00458976	0.0832344	11.2899	12.5137	0.14847	chr2R	12746829	12746950	122	+	65	262	192	149	0.5752	0.4888	0.3556	0.2962
Dek	intronretention_Junction_18832	intronretentionright-Junction_18832	J001	0.0428364	4.1302	0.0421244	0.297409	13.316	12.4073	-0.101966	chr2R	12746902	12746956	55	+	48	274	348	354	0.48	0.5447	0.6248	0.7166
Dek	intronretention_Junction_18832	intronretentionright-Junction_18832	J002	0.0429833	4.11877	0.0424098	0.297692	11.2066	12.1508	0.116705	chr2R	12746909	12747023	115	+	52	229	209	140	0.52	0.4553	0.3752	0.2834	-0.168552
Hsf	intronretention_Junction_19960	intronretentionleft-Junction_19960	J001	0.0502814	9.30838	0.00228109	0.0523105	9.88977	11.422	0.20781	chr2R	14019239	14019297	59	-	66	173	79	99	0.7253	0.5986	0.3641	0.4195
Hsf	intronretention_Junction_19960	intronretentionleft-Junction_19960	J002	0.0503565	9.29774	0.00229436	0.0524832	11.1251	9.57132	-0.21703	chr2R	14019168	14019287	120	-	25	116	138	137	0.2747	0.4014	0.6359	0.5805
Hsf	intronretention_Junction_19960	intronretentionright-Junction_19960	J001	0.0441747	5.56021	0.0183732	0.187745	11.2589	10.0436	-0.164796	chr2R	14019239	14019297	59	-	66	173	79	99	0.3882	0.4957	0.6077	0.6689
Hsf	intronretention_Junction_19960	intronretentionright-Junction_19960	J002	0.0441557	5.56205	0.0183539	0.187623	9.57983	10.8221	0.175916	chr2R	14019250	14019363	114	-	104	176	51	49	0.6118	0.5043	0.3923	0.3311	0.232427
Phb2	intronretention_Junction_20586	intronretentionleft-Junction_20586	J001	0.155787	4.32309	0.0375987	0.280094	12.5422	10.899	-0.202589	chr2R	14708788	14708993	206	+	28	273	211	179	0.0678	0.2086	0.3071	0.3442
Phb2	intronretention_Junction_20586	intronretentionleft-Junction_20586	J002	0.155175	4.33886	0.0372519	0.27923	14.7474	16.3825	0.151704	chr2R	14708717	14708836	120	+	385	1036	476	341	0.9322	0.7914	0.6929	0.6558
Phb2	intronretention_Junction_20586	intronretentionright-Junction_20586	J001	0.24181	7.11972	0.00762407	0.11386	13.1472	10.2962	-0.352644	chr2R	14708788	14708993	206	+	28	273	211	179	0.0771	0.3223	0.5894	0.6109
Phb2	intronretention_Junction_20586	intronretentionright-Junction_20586	J002	0.241204	7.13686	0.00755153	0.113312	11.9435	14.8059	0.309945	chr2R	14708946	14709058	113	+	335	574	147	114	0.9229	0.6777	0.4106	0.3891	-0.254988
Phb2	intronretention_Junction_20587	intronretentionleft-Junction_20587	J001	0.0343869	11.2383	0.000801276	0.0254878	10.3512	8.7861	-0.236504	chr2R	14708788	14708996	209	+	20	105	97	84	0.0699	0.0951	0.18	0.2228
Phb2	intronretention_Junction_20587	intronretentionleft-Junction_20587	J002	0.0336735	11.4164	0.000728	0.0238607	14.479	15.6989	0.116702	chr2R	14708719	14708836	118	+	266	999	442	293	0.9301	0.9049	0.82	0.7772
Phb2	intronretention_Junction_20587	intronretentionright-Junction_20587	J001	0.103405	12.2812	0.000457555	0.0173605	10.8237	8.27364	-0.387598	chr2R	14708788	14708996	209	+	20	105	97	84	0.1143	0.2605	0.548	0.5638
Phb2	intronretention_Junction_20587	intronretentionright-Junction_20587	J002	0.102571	12.3675	0.000436881	0.016761	10.1791	12.6529	0.313848	chr2R	14708949	14709045	97	+	155	298	80	65	0.8857	0.7395	0.452	0.4362	-0.18252
CG11961	intronretention_Junction_20988	intronretentionleft-Junction_20988	J001	0.0945018	7.89917	0.00494576	0.0866837	10.6478	8.2471	-0.368598	chr2R	15249567	15249627	61	+	41	30	101	91	0.2611	0.4688	0.7163	0.6408
CG11961	intronretention_Junction_20988	intronretentionleft-Junction_20988	J002	0.0941842	7.92252	0.00488231	0.0861822	8.57365	10.9521	0.353225	chr2R	15249498	15249615	118	+	116	34	40	51	0.7389	0.5312	0.2837	0.3592
CG11961	intronretention_Junction_20988	intronretentionright-Junction_20988	J001	0.0392994	4.92982	0.026397	0.230155	9.70184	8.92267	-0.120783	chr2R	15249567	15249627	61	+	41	30	101	91	0.6721	0.566	0.7769	0.8053
CG11961	intronretention_Junction_20988	intronretentionright-Junction_20988	J002	0.0410354	4.8129	0.0282475	0.239385	6.21761	7.26526	0.224654	chr2R	15249580	15249701	122	+	20	23	29	22	0.3279	0.434	0.2231	0.1947	-0.281694
CG17337	intronretention_Junction_21418	intronretentionleft-Junction_21418	J001	0.0398076	7.71359	0.00548067	0.0922695	12.0871	10.8296	-0.158488	chr2R	1587493	1587546	54	+	40	189	182	185	0.367	0.3818	0.5353	0.6424
CG17337	intronretention_Junction_21418	intronretentionleft-Junction_21418	J002	0.0397785	7.71821	0.00546666	0.092142	11.0482	12.2942	0.15417	chr2R	1587420	1587541	122	+	69	306	158	103	0.633	0.6182	0.4647	0.3576
CG17337	intronretention_Junction_21418	intronretentionright-Junction_21418	J001	0.144408	6.16655	0.0130188	0.154894	12.5328	10.3549	-0.275392	chr2R	1587493	1587546	54	+	40	189	182	185	0.1762	0.4047	0.5652	0.6607
CG17337	intronretention_Junction_21418	intronretentionright-Junction_21418	J002	0.144132	6.17759	0.0129378	0.154563	11.1795	13.3504	0.256034	chr2R	1587499	1587619	121	+	187	278	140	95	0.8238	0.5953	0.4348	0.3393	-0.195007
CG9945	intronretention_Junction_21878	intronretentionleft-Junction_21878	J001	0.0254506	13.0581	0.000301978	0.0130053	8.29944	6.26434	-0.405852	chr2R	16508255	16508320	66	+	13	25	52	44	0.0695	0.0644	0.1705	0.1803
CG9945	intronretention_Junction_21878	intronretentionleft-Junction_21878	J002	0.0241852	13.4487	0.00024517	0.0110866	12.7383	13.8427	0.119951	chr2R	16508183	16508303	121	+	174	363	253	200	0.9305	0.9356	0.8295	0.8197
CG9945	intronretention_Junction_21878	intronretentionright-Junction_21878	J001	0.0260466	11.1974	0.000819102	0.0259145	8.23488	6.32297	-0.381145	chr2R	16508255	16508320	66	+	13	25	52	44	0.0802	0.082	0.1891	0.2066
CG9945	intronretention_Junction_21878	intronretentionright-Junction_21878	J002	0.0247955	11.5151	0.000690322	0.0231207	12.2334	13.3072	0.121389	chr2R	16508273	16508385	113	+	149	280	223	169	0.9198	0.918	0.8109	0.7934	-0.172903
l(2)06496	intronretention_Junction_23834	intronretentionleft-Junction_23834	J001	0.0227644	9.3702	0.00220541	0.0512676	9.26518	7.69748	-0.267433	chr2R	18949298	18949361	64	-	28	42	54	70	0.1489	0.1522	0.2755	0.303
l(2)06496	intronretention_Junction_23834	intronretentionleft-Junction_23834	J002	0.0221304	9.53711	0.00201358	0.0484208	11.8347	12.8884	0.123044	chr2R	18949239	18949346	108	-	160	234	142	161	0.8511	0.8478	0.7245	0.697
l(2)06496	intronretention_Junction_23834	intronretentionright-Junction_23834	J001	0.0308377	3.93994	0.0471526	0.31506	9.02339	7.97739	-0.177754	chr2R	18949298	18949361	64	-	28	42	54	70	0.2044	0.1736	0.2673	0.3241
l(2)06496	intronretention_Junction_23834	intronretentionright-Junction_23834	J002	0.0301068	4.0073	0.0453037	0.308595	11.477	12.2643	0.095727	chr2R	18949314	18949432	119	-	109	200	148	146	0.7956	0.8264	0.7327	0.6759	-0.186853
CG3530	intronretention_Junction_24000	intronretentionleft-Junction_24000	J001	0.0652704	4.84743	0.0276874	0.236846	17.4813	16.4578	-0.0870447	chr2R	19277181	19277240	60	-	44	899	2052	2353	0.4037	0.5598	0.6502	0.7242
CG3530	intronretention_Junction_24000	intronretentionleft-Junction_24000	J002	0.0653297	4.84362	0.0277487	0.237105	15.04	16.0712	0.0956765	chr2R	19277111	19277229	119	-	65	707	1104	896	0.5963	0.4402	0.3498	0.2758
CG3530	intronretention_Junction_24000	intronretentionright-Junction_24000	J001	0.0475899	5.7369	0.0166121	0.178262	17.4822	16.4795	-0.0852202	chr2R	19277181	19277240	60	-	44	899	2052	2353	0.3894	0.5071	0.6105	0.6803
CG3530	intronretention_Junction_24000	intronretentionright-Junction_24000	J002	0.0476221	5.7336	0.0166434	0.178262	15.6176	16.627	0.09035	chr2R	19277193	19277314	122	-	69	874	1309	1106	0.6106	0.4929	0.3895	0.3197	-0.167574
CG3209	intronretention_Junction_24907	intronretentionleft-Junction_24907	J001	0.0852745	6.47412	0.0109456	0.139455	13.4841	11.7326	-0.200737	chr2R	19959747	19960226	480	+	61	191	382	292	0.3144	0.5093	0.6497	0.707
CG3209	intronretention_Junction_24907	intronretentionleft-Junction_24907	J002	0.0853635	6.46797	0.0109836	0.139549	11.3131	13.0735	0.208649	chr2R	19959674	19959795	122	+	133	184	206	121	0.6856	0.4907	0.3503	0.293
CG3209	intronretention_Junction_24907	intronretentionright-Junction_24907	J001	0.0180907	14.3839	0.000149069	0.00757856	13.1928	12.0047	-0.136157	chr2R	19959747	19960226	480	+	61	191	382	292	0.5	0.5276	0.7087	0.7246
CG3209	intronretention_Junction_24907	intronretentionright-Junction_24907	J002	0.0182248	14.3095	0.000155081	0.0078454	10.473	11.8159	0.17406	chr2R	19960179	19960299	121	+	61	171	157	111	0.5	0.4724	0.2913	0.2754	-0.231327
CG13585	intronretention_Junction_25212	intronretentionleft-Junction_25212	J001	0.164594	11.9657	0.000541885	0.0193465	12.4573	9.49465	-0.391808	chr2R	20419257	20419961	705	+	17	131	208	237	0.2024	0.4352	0.7273	0.8556
CG13585	intronretention_Junction_25212	intronretentionleft-Junction_25212	J002	0.165048	11.936	0.0005506	0.0195584	8.5776	11.5476	0.428949	chr2R	20419184	20419305	122	+	67	170	78	40	0.7976	0.5648	0.2727	0.1444
CG13585	intronretention_Junction_25212	intronretentionright-Junction_25212	J001	0.0408619	8.03596	0.00458578	0.0832344	11.6867	10.3627	-0.173481	chr2R	20419257	20419961	705	+	17	131	208	237	0.2656	0.2885	0.4416	0.5448
CG13585	intronretention_Junction_25212	intronretentionright-Junction_25212	J002	0.0407453	8.05432	0.00453953	0.0828334	11.7533	13.0084	0.146379	chr2R	20419914	20420032	119	+	47	323	263	198	0.7344	0.7115	0.5584	0.4552	-0.410585
Acsl	intronretention_Junction_28709	intronretentionleft-Junction_28709	J001	0.188118	6.418	0.011297	0.141494	10.9254	13.543	0.309863	chr2R	4567991	4568052	62	+	193	209	130	111	0.9415	0.777	0.5963	0.5441
Acsl	intronretention_Junction_28709	intronretentionleft-Junction_28709	J002	0.189936	6.36285	0.0116534	0.143897	10.1199	7.50139	-0.431962	chr2R	4567924	4568039	116	+	12	60	88	93	0.0585	0.223	0.4037	0.4559
Acsl	intronretention_Junction_28709	intronretentionright-Junction_28709	J001	0.0348203	13.3614	0.000256857	0.0114705	11.3402	13.0271	0.20008	chr2R	4567991	4568052	62	+	193	209	130	111	0.7569	0.6875	0.5	0.4387
Acsl	intronretention_Junction_28709	intronretentionright-Junction_28709	J002	0.035028	13.2975	0.000265755	0.0118165	11.7158	9.90615	-0.242063	chr2R	4568005	4568116	112	+	62	95	130	142	0.2431	0.3125	0.5	0.5613	0.196219
CG33774	intronretention_Junction_29628	intronretentionleft-Junction_29628	J001	0.0415843	11.4162	0.000728078	0.0238607	15.7528	14.1203	-0.157836	chr2R	5287373	5287451	79	-	302	247	509	502	0.4801	0.5453	0.705	0.7832
CG33774	intronretention_Junction_29628	intronretentionleft-Junction_29628	J002	0.0416442	11.4011	0.000734012	0.0239977	12.5346	14.2147	0.181461	chr2R	5287300	5287421	122	-	327	206	213	139	0.5199	0.4547	0.295	0.2168
CG33774	intronretention_Junction_29628	intronretentionright-Junction_29628	J001	0.15462	5.32853	0.0209791	0.203079	16.2522	13.6839	-0.248154	chr2R	5287373	5287451	79	-	302	247	509	502	0.3989	0.6604	0.7574	0.8581
CG33774	intronretention_Junction_29628	intronretentionright-Junction_29628	J002	0.15471	5.32549	0.0210157	0.203234	11.9335	14.5037	0.281404	chr2R	5287404	5287524	121	-	455	127	163	83	0.6011	0.3396	0.2426	0.1419	-0.175441
cbx	intronretention_Junction_30089	intronretentionleft-Junction_30089	J001	0.0371549	6.92237	0.00851243	0.121542	13.6495	12.5758	-0.118195	chr2R	5752574	5752627	54	-	125	345	251	238	0.641	0.6183	0.7515	0.8264
cbx	intronretention_Junction_30089	intronretentionleft-Junction_30089	J002	0.0374695	6.8749	0.00874145	0.123303	9.79345	11.0046	0.168216	chr2R	5752501	5752622	122	-	70	213	83	50	0.359	0.3817	0.2485	0.1736
cbx	intronretention_Junction_30089	intronretentionright-Junction_30089	J001	0.0239488	7.90337	0.00493427	0.0866531	13.5876	12.6269	-0.105789	chr2R	5752574	5752627	54	-	125	345	251	238	0.5841	0.5897	0.7151	0.7677
cbx	intronretention_Junction_30089	intronretentionright-Junction_30089	J002	0.0241138	7.86172	0.00504922	0.0875516	10.4826	11.5763	0.143178	chr2R	5752580	5752701	122	-	89	240	100	72	0.4159	0.4103	0.2849	0.2323	-0.108847
NONE	intronretention_Junction_30489	intronretentionleft-Junction_30489	J001	0.241581	13.1843	0.000282305	0.0123258	7.95131	2.70035	-1.55805	chr2R	5929125	5929988	864	+	57	58	2	1	0.0015	0.0059	0.2222	0.0714
NONE	intronretention_Junction_30489	intronretentionleft-Junction_30489	J002	0.237037	13.2648	0.000270439	0.0119418	13.455	18.9756	0.496005	chr2R	5929080	5929173	94	+	39044	9785	7	13	0.9985	0.9941	0.7778	0.9286
NONE	intronretention_Junction_30489	intronretentionright-Junction_30489	J001	0.210318	12.1921	0.000479919	0.0178491	7.7557	2.7945	-1.47267	chr2R	5929125	5929988	864	+	57	58	2	1	0.0011	0.0042	0.1176	0.0455
NONE	intronretention_Junction_30489	intronretentionright-Junction_30489	J002	0.206251	12.262	0.000462265	0.0174404	14.9848	19.9815	0.415168	chr2R	5929941	5930037	97	+	49849	13881	15	21	0.9989	0.9958	0.8824	0.9545	-0.241171
NONE	intronretention_Junction_30538	intronretentionleft-Junction_30538	J001	0.142243	20.0136	7.6892e-06	0.000765736	8.21931	2.53434	-1.69741	chr2R	5929187	5929834	648	+	49	23	2	2	0.0016	0.0038	0.0769	0.2857
NONE	intronretention_Junction_30538	intronretentionleft-Junction_30538	J002	0.136957	20.1681	7.0926e-06	0.000716736	13.8594	18.7302	0.4345	chr2R	5929139	5929235	97	+	30139	6069	24	5	0.9984	0.9962	0.9231	0.7143
NONE	intronretention_Junction_30538	intronretentionright-Junction_30538	J001	0.115721	23.2831	1.39822e-06	0.000186712	8.62918	2.34348	-1.88057	chr2R	5929187	5929834	648	+	49	23	2	2	0.001	0.0022	0.0741	0.1818
NONE	intronretention_Junction_30538	intronretentionright-Junction_30538	J002	0.111471	23.4203	1.30199e-06	0.000177316	14.8242	19.7485	0.413785	chr2R	5929787	5929881	95	+	48762	10238	25	9	0.999	0.9978	0.9259	0.8182	-0.288269
NONE	intronretention_Junction_30569	intronretentionleft-Junction_30569	J001	0.337022	32.7574	1.04409e-08	3.51987e-06	9.41555	1.94659	-2.2741	chr2R	5929247	5929834	588	+	12	24	5	5	0.0005	0.004	0.3125	0.4167
NONE	intronretention_Junction_30569	intronretentionleft-Junction_30569	J002	0.321931	34.0372	5.40689e-09	2.00343e-06	11.0673	19.4633	0.814445	chr2R	5929200	5929295	96	+	23278	5945	11	7	0.9995	0.996	0.6875	0.5833
NONE	intronretention_Junction_30569	intronretentionright-Junction_30569	J001	0.427074	27.9424	1.24983e-07	2.49502e-05	9.48193	1.92923	-2.29716	chr2R	5929247	5929834	588	+	12	24	5	5	0.0003	0.0026	0.1923	0.4167
NONE	intronretention_Junction_30569	intronretentionright-Junction_30569	J002	0.409719	28.9919	7.2682e-08	1.66074e-05	12.3842	21.4173	0.790277	chr2R	5929787	5929876	90	+	45699	9154	21	7	0.9997	0.9974	0.8077	0.5833	-0.527693
NONE	intronretention_Junction_30742	intronretentionleft-Junction_30742	J001	0.125729	17.8495	2.39085e-05	0.00198653	8.45876	3.03682	-1.47788	chr2R	5929782	5929834	53	+	76	39	1	3	0.0028	0.0057	0.0588	0.2727
NONE	intronretention_Junction_30742	intronretentionleft-Junction_30742	J002	0.122343	17.9531	2.26419e-05	0.00188892	13.5853	18.2165	0.423203	chr2R	5929737	5929830	94	+	27298	6817	16	8	0.9972	0.9943	0.9412	0.7273
NONE	intronretention_Junction_30742	intronretentionright-Junction_30742	J001	0.199356	18.1706	2.01973e-05	0.00175622	8.57165	3.00606	-1.5117	chr2R	5929782	5929834	53	+	76	39	1	3	0.0016	0.004	0.0455	0.3
NONE	intronretention_Junction_30742	intronretentionright-Junction_30742	J002	0.194815	18.3122	1.87504e-05	0.00164694	14.1309	19.707	0.47985	chr2R	5929787	5929878	92	+	46661	9625	21	7	0.9984	0.996	0.9545	0.7	-0.261416
Nipped-B	intronretention_Junction_31223	intronretentionleft-Junction_31223	J001	0.0465782	12.5717	0.000391638	0.0156647	5.80106	3.22491	-0.847058	chr2R	614590	614661	72	-	2	4	28	20	0.0833	0.1143	0.4242	0.4167
Nipped-B	intronretention_Junction_31223	intronretentionleft-Junction_31223	J002	0.0426498	12.9866	0.00031372	0.0133127	6.5488	8.08317	0.303691	chr2R	614539	614638	100	-	22	31	38	28	0.9167	0.8857	0.5758	0.5833
Nipped-B	intronretention_Junction_31223	intronretentionright-Junction_31223	J001	0.0507605	5.21067	0.0224486	0.211279	5.24126	3.62191	-0.533163	chr2R	614590	614661	72	-	2	4	28	20	0.1818	0.1481	0.4308	0.3774
Nipped-B	intronretention_Junction_31223	intronretentionright-Junction_31223	J002	0.0473561	5.34781	0.0207483	0.201501	6.09276	7.1741	0.235703	chr2R	614614	614710	97	-	9	23	37	33	0.8182	0.8519	0.5692	0.6226	-0.412503
lola	intronretention_Junction_31640	intronretentionleft-Junction_31640	J001	0.038237	3.88568	0.0486996	0.319707	14.2437	13.451	-0.0826112	chr2R	6403163	6403338	176	-	96	622	343	290	0.5275	0.5946	0.6609	0.7379
lola	intronretention_Junction_31640	intronretentionleft-Junction_31640	J002	0.0383559	3.87575	0.0489884	0.320461	11.7655	12.5978	0.0986101	chr2R	6403094	6403211	118	-	86	424	176	103	0.4725	0.4054	0.3391	0.2621
lola	intronretention_Junction_31640	intronretentionright-Junction_31640	J001	0.0150915	5.232	0.022175	0.209711	13.5492	14.2063	0.0683152	chr2R	6403163	6403338	176	-	96	622	343	290	0.6038	0.6116	0.4865	0.507
lola	intronretention_Junction_31640	intronretentionright-Junction_31640	J002	0.0151151	5.22545	0.0222587	0.210069	13.5941	12.9106	-0.0744196	chr2R	6403291	6403406	116	-	63	395	362	282	0.3962	0.3884	0.5135	0.493	-0.104284
CG17528	intronretention_Junction_32134	intronretentionleft-Junction_32134	J001	0.0322839	5.1747	0.0229182	0.212825	10.5279	9.57858	-0.136334	chr2R	705235	705288	54	-	51	161	78	62	0.4951	0.5244	0.7222	0.6392
CG17528	intronretention_Junction_32134	intronretentionleft-Junction_32134	J002	0.0324772	5.15461	0.0231847	0.214213	8.39924	9.45144	0.170275	chr2R	705166	705283	118	-	52	146	30	35	0.5049	0.4756	0.2778	0.3608
CG17528	intronretention_Junction_32134	intronretentionright-Junction_32134	J001	0.112628	4.86193	0.0274557	0.235795	10.9513	9.17701	-0.255005	chr2R	705235	705288	54	-	51	161	78	62	0.329	0.5709	0.7027	0.7381
CG17528	intronretention_Junction_32134	intronretentionright-Junction_32134	J002	0.112579	4.86373	0.027427	0.235648	8.3125	10.1064	0.281913	chr2R	705241	705359	119	-	104	121	33	22	0.671	0.4291	0.2973	0.2619	-0.134106
ox	intronretention_Junction_34090	intronretentionleft-Junction_34090	J001	0.0478647	25.0774	5.50741e-07	8.79381e-05	20.8331	18.3833	-0.180484	chr2R	8644736	8644801	66	-	646	2342	2873	2991	0.5401	0.6571	0.869	0.8923
ox	intronretention_Junction_34090	intronretentionleft-Junction_34090	J002	0.047918	25.0503	5.58552e-07	8.83564e-05	14.6992	17.195	0.226259	chr2R	8644665	8644784	120	-	550	1222	433	361	0.4599	0.3429	0.131	0.1077
ox	intronretention_Junction_34090	intronretentionright-Junction_34090	J001	0.0420803	5.11242	0.0237552	0.216652	20.1237	19.0914	-0.075972	chr2R	8644736	8644801	66	-	646	2342	2873	2991	0.5424	0.6306	0.7028	0.7654
ox	intronretention_Junction_34090	intronretentionright-Junction_34090	J002	0.0421059	5.10939	0.0237966	0.216869	16.9912	18.0335	0.085893	chr2R	8644754	8644875	122	-	545	1372	1215	917	0.4576	0.3694	0.2972	0.2346	-0.189254
CG6145	intronretention_Junction_34727	intronretentionleft-Junction_34727	J001	0.109234	4.94377	0.0261848	0.228799	6.89245	8.35913	0.278336	chr2R	9426360	9426475	116	-	44	128	11	17	0.8302	0.7356	0.3667	0.6296
CG6145	intronretention_Junction_34727	intronretentionleft-Junction_34727	J002	0.114466	4.79109	0.0286074	0.241149	6.92497	5.30982	-0.383144	chr2R	9426295	9426408	114	-	9	46	19	10	0.1698	0.2644	0.6333	0.3704
CG6145	intronretention_Junction_34727	intronretentionright-Junction_34727	J001	0.0393011	8.36815	0.00381854	0.0736299	6.91546	8.3033	0.263859	chr2R	9426360	9426475	116	-	44	128	11	17	0.7213	0.6995	0.3667	0.4857
CG6145	intronretention_Junction_34727	intronretentionright-Junction_34727	J002	0.0406774	8.23108	0.0041179	0.0776192	7.61062	6.04982	-0.331121	chr2R	9426428	9426536	109	-	17	55	19	18	0.2787	0.3005	0.6333	0.5143	0.222793
Cp1	intronretention_Junction_35126	intronretentionleft-Junction_35126	J001	0.0335212	9.15254	0.00248374	0.0555787	12.2124	10.8829	-0.16628	chr2R	9848381	9849723	1343	+	37	74	346	343	0.3491	0.2624	0.4846	0.5293
Cp1	intronretention_Junction_35126	intronretentionleft-Junction_35126	J002	0.0334713	9.1641	0.00246809	0.0553489	12.1262	13.3893	0.142952	chr2R	9848308	9848429	122	+	69	208	368	305	0.6509	0.7376	0.5154	0.4707
Cp1	intronretention_Junction_35126	intronretentionright-Junction_35126	J001	0.0509699	27.9327	1.25608e-07	2.49502e-05	12.9172	10.2408	-0.334972	chr2R	9848381	9849723	1343	+	37	74	346	343	0.4253	0.2803	0.781	0.7673
Cp1	intronretention_Junction_35126	intronretentionright-Junction_35126	J002	0.0512858	27.783	1.35713e-07	2.64538e-05	9.33997	12.1083	0.374507	chr2R	9849676	9849789	114	+	50	190	97	104	0.5747	0.7197	0.219	0.2327	-0.205924
CG16974	intronretention_Junction_3529	intronretentionleft-Junction_3529	J001	0.124481	5.70535	0.0169133	0.179751	9.76789	8.05263	-0.278586	chr2L	13186964	13187031	68	-	20	106	53	61	0.4545	0.7211	0.8548	0.8714
CG16974	intronretention_Junction_3529	intronretentionleft-Junction_3529	J002	0.127341	5.61457	0.0178118	0.184593	5.10558	6.98499	0.452181	chr2L	13186903	13187012	110	-	24	41	9	9	0.5455	0.2789	0.1452	0.1286
CG16974	intronretention_Junction_3529	intronretentionright-Junction_3529	J001	0.042127	5.38864	0.0202683	0.199001	9.47318	8.39068	-0.175061	chr2L	13186964	13187031	68	-	20	106	53	61	0.4762	0.5171	0.6543	0.7531
CG16974	intronretention_Junction_3529	intronretentionright-Junction_3529	J002	0.0426651	5.34722	0.0207553	0.201521	7.12841	8.34622	0.227542	chr2L	13186984	13187102	119	-	22	99	28	20	0.5238	0.4829	0.3457	0.2469	-0.195046
CG17684	intronretention_Junction_36005	intronretentionleft-Junction_36005	J001	0.0642176	5.58359	0.0181296	0.186408	13.0871	11.8499	-0.143265	chr2RHet	609638	609720	83	-	101	316	202	168	0.6196	0.69	0.786	0.8705
CG17684	intronretention_Junction_36005	intronretentionleft-Junction_36005	J002	0.0649477	5.53308	0.0186602	0.189407	8.62673	9.98811	0.211399	chr2RHet	609570	609686	117	-	62	142	55	25	0.3804	0.31	0.214	0.1295
CG17684	intronretention_Junction_36005	intronretentionright-Junction_36005	J001	0.0759707	7.64458	0.0056943	0.0943978	13.288	11.653	-0.189415	chr2RHet	609638	609720	83	-	101	316	202	168	0.4353	0.5411	0.6871	0.8116
CG17684	intronretention_Junction_36005	intronretentionright-Junction_36005	J002	0.0761057	7.63268	0.005732	0.0946793	10.1832	11.8576	0.219622	chr2RHet	609673	609794	122	-	131	268	92	39	0.5647	0.4589	0.3129	0.1884	-0.114617
CG7888	intronretention_Junction_36861	intronretentionleft-Junction_36861	J001	0.0934484	11.3399	0.00075858	0.0245702	2.61139	5.15211	0.980345	chr3L	11052403	11052453	51	+	10	22	1	3	0.1562	0.2558	0.0125	0.0476
CG7888	intronretention_Junction_36861	intronretentionleft-Junction_36861	J002	0.0816836	12.155	0.000489552	0.0181394	10.2847	8.82395	-0.221005	chr3L	11052356	11052451	96	+	54	64	79	60	0.8438	0.7442	0.9875	0.9524
CG7888	intronretention_Junction_36861	intronretentionright-Junction_36861	J001	0.0824059	4.66734	0.0307415	0.250966	2.96604	4.59174	0.630505	chr3L	11052403	11052453	51	+	10	22	1	3	0.1389	0.2037	0.0196	0.0909
CG7888	intronretention_Junction_36861	intronretentionright-Junction_36861	J002	0.0704732	5.01614	0.0251121	0.222946	9.47508	8.59728	-0.140257	chr3L	11052406	11052501	96	+	62	86	50	30	0.8611	0.7963	0.9804	0.9091	0.281039
CG32103	intronretention_Junction_37866	intronretentionleft-Junction_37866	J001	0.0285642	12.741	0.000357728	0.0147572	10.6733	9.30796	-0.197465	chr3L	12398036	12398100	65	-	48	115	76	88	0.5217	0.575	0.8	0.7857
CG32103	intronretention_Junction_37866	intronretentionleft-Junction_37866	J002	0.0290291	12.6242	0.000380783	0.0153241	7.0158	8.75795	0.319985	chr3L	12397963	12398084	122	-	44	85	19	24	0.4783	0.425	0.2	0.2143
CG32103	intronretention_Junction_37866	intronretentionright-Junction_37866	J001	0.0377566	15.1215	0.000100808	0.00562205	10.9071	9.10157	-0.261075	chr3L	12398036	12398100	65	-	48	115	76	88	0.3721	0.4618	0.7451	0.704
CG32103	intronretention_Junction_37866	intronretentionright-Junction_37866	J002	0.0377707	15.1176	0.000101016	0.00562205	8.22685	10.1454	0.302409	chr3L	12398053	12398173	121	-	81	134	26	37	0.6279	0.5382	0.2549	0.296	-0.176508
CG12355	intronretention_Junction_39966	intronretentionleft-Junction_39966	J001	0.0356296	22.6665	1.92698e-06	0.000235877	11.1166	8.98075	-0.307802	chr3L	15487758	15487858	101	-	18	116	123	119	0.2769	0.2959	0.6059	0.6919
CG12355	intronretention_Junction_39966	intronretentionleft-Junction_39966	J002	0.03551	22.7225	1.87165e-06	0.000231168	9.37618	11.4556	0.28898	chr3L	15487685	15487806	122	-	47	276	80	53	0.7231	0.7041	0.3941	0.3081
CG12355	intronretention_Junction_39966	intronretentionright-Junction_39966	J001	0.025624	8.18183	0.00423121	0.0789948	10.6102	9.50069	-0.159345	chr3L	15487758	15487858	101	-	18	116	123	119	0.4286	0.4531	0.6649	0.6296
CG12355	intronretention_Junction_39966	intronretentionright-Junction_39966	J002	0.0257786	8.1504	0.00430517	0.079845	8.90466	10.0825	0.179227	chr3L	15487811	15487931	121	-	24	140	62	70	0.5714	0.5469	0.3351	0.3704	-0.341021
drpr	intronretention_Junction_41539	intronretentionleft-Junction_41539	J001	0.0612988	11.1793	0.000827165	0.0260494	8.59023	6.65633	-0.367971	chr3L	1716556	1716673	118	-	13	50	44	37	0.26	0.4167	0.6984	0.6981
drpr	intronretention_Junction_41539	intronretentionleft-Junction_41539	J002	0.0608715	11.2275	0.000805961	0.0255775	6.43128	8.38936	0.383455	chr3L	1716509	1716604	96	-	37	70	19	16	0.74	0.5833	0.3016	0.3019
drpr	intronretention_Junction_41539	intronretentionright-Junction_41539	J001	0.0456104	10.3614	0.0012868	0.0354025	8.44591	6.79334	-0.314132	chr3L	1716556	1716673	118	-	13	50	44	37	0.3611	0.3145	0.5867	0.6981
drpr	intronretention_Junction_41539	intronretentionright-Junction_41539	J002	0.0451859	10.4222	0.0012451	0.0345311	7.00379	8.61579	0.298846	chr3L	1716626	1716718	93	-	23	109	31	16	0.6389	0.6855	0.4133	0.3019	-0.321859
Taf6	intronretention_Junction_43177	intronretentionleft-Junction_43177	J001	0.147744	6.40127	0.0114039	0.142044	6.26124	4.16636	-0.587661	chr3L	19594249	19594308	60	+	5	7	17	29	0.2632	0.0864	0.3864	0.5686
Taf6	intronretention_Junction_43177	intronretentionleft-Junction_43177	J002	0.142036	6.60715	0.010157	0.133327	6.36597	8.2685	0.377245	chr3L	19594205	19594297	93	+	14	74	27	22	0.7368	0.9136	0.6136	0.4314
Taf6	intronretention_Junction_43177	intronretentionright-Junction_43177	J001	0.155178	3.81348	0.0508416	0.325046	6.02459	4.35753	-0.467352	chr3L	19594249	19594308	60	+	5	7	17	29	0.1389	0.0707	0.1848	0.4028
Taf6	intronretention_Junction_43177	intronretentionright-Junction_43177	J002	0.147281	3.97499	0.0461808	0.311884	8.32158	9.80713	0.236974	chr3L	19594261	19594355	95	+	31	92	75	43	0.8611	0.9293	0.8152	0.5972	-0.35331
mri	intronretention_Junction_43795	intronretentionleft-Junction_43795	J001	0.0459701	7.84207	0.00510442	0.0880989	11.9381	10.6665	-0.162487	chr3L	201368	201439	72	+	24	212	168	184	0.3117	0.4417	0.6222	0.6174
mri	intronretention_Junction_43795	intronretentionleft-Junction_43795	J002	0.0459999	7.83825	0.00511521	0.0881741	10.512	11.7915	0.165705	chr3L	201295	201416	122	+	53	268	102	114	0.6883	0.5583	0.3778	0.3826
mri	intronretention_Junction_43795	intronretentionright-Junction_43795	J001	0.0635984	5.70539	0.0169129	0.179751	11.9151	10.655	-0.161262	chr3L	201368	201439	72	+	24	212	168	184	0.4	0.4862	0.6109	0.739
mri	intronretention_Junction_43795	intronretentionright-Junction_43795	J002	0.0638043	5.69077	0.0170544	0.180535	9.78874	11.0817	0.178988	chr3L	201392	201513	122	+	36	224	107	65	0.6	0.5138	0.3891	0.261	-0.221322
CG11796	intronretention_Junction_44123	intronretentionleft-Junction_44123	J001	0.0945222	14.2687	0.000158476	0.00797056	17.9461	15.8034	-0.183434	chr3L	20431400	20431463	64	-	234	39	2408	3066	0.3617	0.1921	0.6401	0.7127
CG11796	intronretention_Junction_44123	intronretentionleft-Junction_44123	J002	0.0945647	14.2627	0.000158983	0.00797056	15.6277	17.772	0.185501	chr3L	20431327	20431448	122	-	413	164	1354	1236	0.6383	0.8079	0.3599	0.2873
CG11796	intronretention_Junction_44123	intronretentionright-Junction_44123	J001	0.0805714	7.9245	0.00487698	0.0861622	17.5308	16.2007	-0.113834	chr3L	20431400	20431463	64	-	234	39	2408	3066	0.6744	0.4815	0.8019	0.8491
CG11796	intronretention_Junction_44123	intronretentionright-Junction_44123	J002	0.080778	7.90683	0.00492486	0.0866272	12.7439	14.0992	0.145815	chr3L	20431416	20431537	122	-	113	42	595	545	0.3256	0.5185	0.1981	0.1509	-0.379635
CG11796	intronretention_Junction_44131	intronretentionleft-Junction_44131	J001	0.288714	3.99702	0.0455807	0.309712	12.3686	10.5648	-0.227406	chr3L	20432654	20432870	217	-	82	28	131	269	0.8367	0.6829	0.8851	0.9818
CG11796	intronretention_Junction_44131	intronretentionleft-Junction_44131	J002	0.299854	3.87297	0.0490696	0.320652	4.6826	6.39177	0.448906	chr3L	20432608	20432702	95	-	16	13	17	5	0.1633	0.3171	0.1149	0.0182
CG11796	intronretention_Junction_44131	intronretentionright-Junction_44131	J001	0.171298	4.84388	0.0277445	0.237105	12.2352	10.6521	-0.199895	chr3L	20432654	20432870	217	-	82	28	131	269	0.5775	0.3043	0.6753	0.8252
CG11796	intronretention_Junction_44131	intronretentionright-Junction_44131	J002	0.172258	4.81912	0.0281457	0.238931	8.7067	10.2967	0.241986	chr3L	20432823	20432940	118	-	60	64	63	57	0.4225	0.6957	0.3247	0.1748	-0.103577
CG5059	intronretention_Junction_44205	intronretentionleft-Junction_44205	J001	0.0364357	3.9721	0.0462601	0.312111	12.3221	13.1952	0.0987569	chr3L	20508723	20508823	101	-	75	434	243	179	0.6198	0.7221	0.5523	0.528
CG5059	intronretention_Junction_44205	intronretentionleft-Junction_44205	J002	0.0365915	3.95648	0.0466913	0.313837	11.8359	10.9117	-0.117295	chr3L	20508650	20508771	122	-	46	167	197	160	0.3802	0.2779	0.4477	0.472
CG5059	intronretention_Junction_44205	intronretentionright-Junction_44205	J001	0.0877794	5.76297	0.0163674	0.176825	13.4876	11.9991	-0.168712	chr3L	20508723	20508823	101	-	75	434	243	179	0.5556	0.7457	0.8617	0.8443
CG5059	intronretention_Junction_44205	intronretentionright-Junction_44205	J002	0.0885452	5.72065	0.0167665	0.179053	8.39689	9.98336	0.24967	chr3L	20508776	20508886	111	-	60	148	39	33	0.4444	0.2543	0.1383	0.1557	0.100634
M6	intronretention_Junction_45037	intronretentionleft-Junction_45037	J001	0.0492395	7.39973	0.00652337	0.103073	9.36081	8.23415	-0.185014	chr3L	21504713	21504768	56	+	29	92	45	54	0.6591	0.748	0.8824	0.9153
M6	intronretention_Junction_45037	intronretentionleft-Junction_45037	J002	0.0531972	7.14783	0.00750547	0.112868	4.13334	5.95632	0.527114	chr3L	21504651	21504761	111	+	15	31	6	5	0.3409	0.252	0.1176	0.0847
M6	intronretention_Junction_45037	intronretentionright-Junction_45037	J001	0.0907036	6.14594	0.0131714	0.155941	9.58285	8.03138	-0.254806	chr3L	21504713	21504768	56	+	29	92	45	54	0.5088	0.7023	0.8824	0.8308
M6	intronretention_Junction_45037	intronretentionright-Junction_45037	J002	0.0928916	6.05254	0.0138863	0.160746	5.161	6.96671	0.432829	chr3L	21504721	21504833	113	+	28	39	6	11	0.4912	0.2977	0.1176	0.1692	-0.121459
nrm	intronretention_Junction_46281	intronretentionleft-Junction_46281	J001	0.0740917	13.4478	0.000245296	0.0110866	5.51158	2.48768	-1.14766	chr3L	23030853	23031110	258	+	2	4	14	10	0.0177	0.0252	0.1261	0.2083
nrm	intronretention_Junction_46281	intronretentionleft-Junction_46281	J002	0.0601361	14.7217	0.000124602	0.00657018	9.90375	11.3155	0.192255	chr3L	23030812	23030901	90	+	111	155	97	38	0.9823	0.9748	0.8739	0.7917
nrm	intronretention_Junction_46281	intronretentionright-Junction_46281	J001	0.0591545	4.19849	0.04046	0.291637	4.62718	3.03316	-0.60931	chr3L	23030853	23031110	258	+	2	4	14	10	0.027	0.0138	0.0581	0.0478
nrm	intronretention_Junction_46281	intronretentionright-Junction_46281	J002	0.0465165	4.68421	0.030441	0.249802	12.0662	12.6673	0.0701333	chr3L	23031063	23031154	92	+	72	285	227	199	0.973	0.9862	0.9419	0.9522	-0.242483
CG11486	intronretention_Junction_47581	intronretentionleft-Junction_47581	J001	0.0674237	13.4027	0.000251262	0.011299	9.12211	7.01131	-0.379685	chr3L	3072616	3073079	464	+	11	33	89	68	0.3438	0.3173	0.7807	0.6415
CG11486	intronretention_Junction_47581	intronretentionleft-Junction_47581	J002	0.0679001	13.3348	0.000260532	0.0115968	6.76109	8.91267	0.3986	chr3L	3072565	3072664	100	+	21	71	25	38	0.6562	0.6827	0.2193	0.3585
CG11486	intronretention_Junction_47581	intronretentionright-Junction_47581	J001	0.0571823	5.89691	0.0151674	0.169012	8.7855	7.31701	-0.26387	chr3L	3072616	3073079	464	+	11	33	89	68	0.234	0.1187	0.309	0.3469
CG11486	intronretention_Junction_47581	intronretentionright-Junction_47581	J002	0.0558998	6.01536	0.0141819	0.162666	10.8463	12.0779	0.15516	chr3L	3073032	3073150	119	+	36	245	199	128	0.766	0.8813	0.691	0.6531	-0.332538
lark	intronretention_Junction_51477	intronretentionleft-Junction_51477	J001	0.097364	4.04904	0.0441966	0.304024	8.73977	7.39068	-0.241888	chr3L	7332717	7332966	250	+	11	58	53	57	0.1325	0.2125	0.2804	0.456
lark	intronretention_Junction_51477	intronretentionleft-Junction_51477	J002	0.095736	4.10236	0.0428234	0.299173	10.4134	11.6631	0.163506	chr3L	7332646	7332765	120	+	72	215	136	68	0.8675	0.7875	0.7196	0.544
lark	intronretention_Junction_51477	intronretentionright-Junction_51477	J001	0.170938	3.89265	0.0484979	0.319147	8.83572	7.27129	-0.281136	chr3L	7332717	7332966	250	+	11	58	53	57	0.2683	0.4328	0.5248	0.7917
lark	intronretention_Junction_51477	intronretentionright-Junction_51477	J002	0.170751	3.89601	0.0484008	0.318845	7.26878	8.83175	0.280987	chr3L	7332919	7333022	104	+	30	76	48	15	0.7317	0.5672	0.4752	0.2083	-0.239947
akirin	intronretention_Junction_51551	intronretentionleft-Junction_51551	J001	0.0209117	12.6707	0.000371428	0.0150359	13.9481	12.7478	-0.12982	chr3L	7365619	7365679	61	+	48	403	363	363	0.5333	0.5373	0.7118	0.7469
akirin	intronretention_Junction_51551	intronretentionleft-Junction_51551	J002	0.0210409	12.6108	0.000383517	0.015404	10.9957	12.3308	0.165323	chr3L	7365547	7365667	121	+	42	347	147	123	0.4667	0.4627	0.2882	0.2531
akirin	intronretention_Junction_51551	intronretentionright-Junction_51551	J001	0.119097	8.92505	0.00281286	0.0606025	14.3188	12.2516	-0.224942	chr3L	7365619	7365679	61	+	48	403	363	363	0.5217	0.7575	0.9144	0.8875
akirin	intronretention_Junction_51551	intronretentionright-Junction_51551	J002	0.120443	8.83741	0.00295118	0.0623095	7.97421	10.1237	0.344328	chr3L	7365632	7365751	120	+	44	129	34	46	0.4783	0.2425	0.0856	0.1125	-0.14602
CG7546	intronretention_Junction_51645	intronretentionleft-Junction_51645	J001	0.0931046	5.26344	0.021778	0.20776	10.3439	8.86631	-0.222374	chr3L	7508877	7508966	90	+	13	80	136	124	0.325	0.5634	0.6904	0.7515
CG7546	intronretention_Junction_51645	intronretentionleft-Junction_51645	J002	0.0940234	5.22577	0.0222546	0.210069	7.73797	9.27009	0.260627	chr3L	7508812	7508925	114	+	27	62	61	41	0.675	0.4366	0.3096	0.2485
CG7546	intronretention_Junction_51645	intronretentionright-Junction_51645	J001	0.0432618	10.2931	0.00133527	0.0360223	10.3255	8.95181	-0.205963	chr3L	7508877	7508966	90	+	13	80	136	124	0.5652	0.6349	0.8718	0.8212
CG7546	intronretention_Junction_51645	intronretentionright-Junction_51645	J002	0.0456301	9.98036	0.00158219	0.0407987	5.85529	7.70614	0.396268	chr3L	7508919	7509016	98	+	10	46	20	27	0.4348	0.3651	0.1282	0.1788	-0.231831
Sbp2	intronretention_Junction_52408	intronretentionleft-Junction_52408	J001	0.105479	8.79278	0.00302424	0.063332	15.4226	13.1586	-0.229048	chr3L	8298068	8298120	53	+	124	332	573	516	0.6108	0.8058	0.9095	0.9231
Sbp2	intronretention_Junction_52408	intronretentionleft-Junction_52408	J002	0.106461	8.71848	0.00315001	0.0650059	8.42583	10.7916	0.357019	chr3L	8298003	8298116	114	+	79	80	57	43	0.3892	0.1942	0.0905	0.0769
Sbp2	intronretention_Junction_52408	intronretentionright-Junction_52408	J001	0.0508048	7.25792	0.00705889	0.108777	14.9802	13.5862	-0.140918	chr3L	8298068	8298120	53	+	124	332	573	516	0.5415	0.6707	0.786	0.805
Sbp2	intronretention_Junction_52408	intronretentionright-Junction_52408	J002	0.0510695	7.22456	0.00719126	0.10987	10.9301	12.4048	0.182584	chr3L	8298073	8298192	120	+	105	163	156	125	0.4585	0.3293	0.214	0.195	-0.130868
CaBP1	intronretention_Junction_5337	intronretentionleft-Junction_5337	J001	0.0535567	7.59408	0.00585604	0.0961489	8.88866	7.535	-0.238358	chr2L	16356470	16356538	69	-	13	63	63	47	0.4643	0.4884	0.6923	0.8103
CaBP1	intronretention_Junction_5337	intronretentionleft-Junction_5337	J002	0.0547288	7.49741	0.00617877	0.0993459	6.1982	7.73074	0.318757	chr2L	16356401	16356518	118	-	15	66	28	11	0.5357	0.5116	0.3077	0.1897
CaBP1	intronretention_Junction_5337	intronretentionright-Junction_5337	J001	0.0549269	6.16996	0.0129938	0.154725	8.76738	7.64809	-0.197047	chr2L	16356470	16356538	69	-	13	63	63	47	0.5417	0.7	0.8514	0.8545
CaBP1	intronretention_Junction_5337	intronretentionright-Junction_5337	J002	0.059231	5.95849	0.0146466	0.165488	4.57702	6.16259	0.429128	chr2L	16356491	16356610	120	-	11	27	11	8	0.4583	0.3	0.1486	0.1455	-0.211512
CG44838	intronretention_Junction_54067	intronretentionleft-Junction_54067	J001	0.0268793	7.15556	0.00747319	0.112505	11.665	10.6224	-0.135075	chr3L	9463537	9463658	122	+	22	159	236	159	0.5	0.5146	0.713	0.6653
CG44838	intronretention_Junction_54067	intronretentionleft-Junction_54067	J002	0.0271385	7.10727	0.00767721	0.114321	9.34115	10.4982	0.168468	chr3L	9463465	9463585	121	+	22	150	95	80	0.5	0.4854	0.287	0.3347
CG44838	intronretention_Junction_54067	intronretentionright-Junction_54067	J001	0.0407327	4.19942	0.0404377	0.29163	11.558	10.6783	-0.11421	chr3L	9463537	9463658	122	+	22	159	236	159	0.44	0.5824	0.6821	0.6974
CG44838	intronretention_Junction_54067	intronretentionright-Junction_54067	J002	0.0411705	4.17099	0.0411218	0.293679	9.28185	10.2364	0.141226	chr3L	9463611	9463728	118	+	28	114	110	69	0.56	0.4176	0.3179	0.3026	-0.142646
tweek	intronretention_Junction_5657	intronretentionleft-Junction_5657	J001	0.0433407	7.69629	0.00553345	0.0927723	8.76406	7.37591	-0.248779	chr2L	16894943	16894999	57	+	14	25	112	59	0.4118	0.5556	0.7368	0.7564
tweek	intronretention_Junction_5657	intronretentionleft-Junction_5657	J002	0.0446878	7.57367	0.00592272	0.0969727	6.05388	7.66972	0.341312	chr2L	16894873	16894991	119	+	20	20	40	19	0.5882	0.4444	0.2632	0.2436
tweek	intronretention_Junction_5657	intronretentionright-Junction_5657	J001	0.0607262	15.6309	7.69861e-05	0.00454284	9.13328	7.07426	-0.368553	chr2L	16894943	16894999	57	+	14	25	112	59	0.4375	0.5682	0.896	0.831
tweek	intronretention_Junction_5657	intronretentionright-Junction_5657	J002	0.0640919	15.1464	9.94889e-05	0.00559208	4.53608	7.16777	0.660078	chr2L	16894952	16895073	122	+	18	19	13	12	0.5625	0.4318	0.104	0.169	-0.20609
CG6126	intronretention_Junction_57263	intronretentionleft-Junction_57263	J001	0.0902493	4.23834	0.0395209	0.288148	8.42419	10.0931	0.260756	chr3R	12024919	12024980	62	-	96	32	32	45	0.8571	0.7273	0.5161	0.6618
CG6126	intronretention_Junction_57263	intronretentionleft-Junction_57263	J002	0.0937601	4.11526	0.0424979	0.298021	7.39727	5.46233	-0.437476	chr3R	12024856	12024967	112	-	16	12	30	23	0.1429	0.2727	0.4839	0.3382
CG6126	intronretention_Junction_57263	intronretentionright-Junction_57263	J001	0.0667146	5.19403	0.0226646	0.211858	8.44559	10.0139	0.245728	chr3R	12024919	12024980	62	-	96	32	32	45	0.8276	0.7273	0.5	0.6338
CG6126	intronretention_Junction_57263	intronretentionright-Junction_57263	J002	0.0691784	5.06055	0.0244765	0.219802	7.65724	5.77631	-0.406674	chr3R	12024933	12025049	117	-	20	12	32	26	0.1724	0.2727	0.5	0.3662	0.143935
CG14883	intronretention_Junction_57462	intronretentionleft-Junction_57462	J001	0.0674323	4.22081	0.039931	0.289727	7.48562	8.65512	0.209432	chr3R	12282037	12282120	84	+	26	54	34	46	0.7879	0.6207	0.425	0.5111
CG14883	intronretention_Junction_57462	intronretentionleft-Junction_57462	J002	0.0684579	4.1838	0.0408121	0.292695	7.76997	6.51133	-0.254958	chr3R	12281967	12282085	119	+	7	33	46	44	0.2121	0.3793	0.575	0.4889
CG14883	intronretention_Junction_57462	intronretentionright-Junction_57462	J001	0.0361162	5.12778	0.0235459	0.215972	8.55219	7.52395	-0.184804	chr3R	12282037	12282120	84	+	26	54	34	46	0.4906	0.5192	0.6667	0.7419
CG14883	intronretention_Junction_57462	intronretentionright-Junction_57462	J002	0.0366893	5.08579	0.0241226	0.218254	6.26796	7.47386	0.253858	chr3R	12282073	12282194	122	+	27	50	17	16	0.5094	0.4808	0.3333	0.2581	0.187176
RpL35A	intronretention_Junction_57835	intronretentionleft-Junction_57835	J001	0.0285433	24.9519	5.87785e-07	9.19202e-05	21.5194	19.7178	-0.126138	chr3R	1291453	1291520	68	-	1524	2284	3466	3474	0.6236	0.5824	0.8153	0.8574
RpL35A	intronretention_Junction_57835	intronretentionleft-Junction_57835	J002	0.0285659	24.9327	5.93677e-07	9.249e-05	16.5002	18.3395	0.15247	chr3R	1291380	1291501	122	-	920	1638	785	578	0.3764	0.4176	0.1847	0.1426
RpL35A	intronretention_Junction_57835	intronretentionright-Junction_57835	J001	0.0279599	4.44356	0.0350332	0.269872	21.0459	20.1905	-0.0598575	chr3R	1291453	1291520	68	-	1524	2284	3466	3474	0.3712	0.4276	0.4918	0.555
RpL35A	intronretention_Junction_57835	intronretentionright-Junction_57835	J002	0.0279575	4.44393	0.0350256	0.269872	20.7544	21.608	0.0581508	chr3R	1291473	1291594	122	-	2582	3058	3581	2785	0.6288	0.5724	0.5082	0.445	-0.158635
CG5706	intronretention_Junction_65443	intronretentionleft-Junction_65443	J001	0.204641	6.34273	0.0117864	0.144921	12.989	10.2974	-0.335017	chr3R	20076397	20076453	57	-	65	164	198	163	0.6842	0.9111	0.9659	0.9702
CG5706	intronretention_Junction_65443	intronretentionleft-Junction_65443	J002	0.21065	6.19075	0.012842	0.153943	4.21734	6.92737	0.715974	chr3R	20076345	20076445	101	-	30	16	7	5	0.3158	0.0889	0.0341	0.0298
CG5706	intronretention_Junction_65443	intronretentionright-Junction_65443	J001	0.0361394	8.78134	0.00304327	0.0635041	12.1866	11.0338	-0.143362	chr3R	20076397	20076453	57	-	65	164	198	163	0.65	0.6357	0.792	0.8534
CG5706	intronretention_Junction_65443	intronretentionright-Junction_65443	J002	0.0369452	8.64488	0.00327982	0.0666482	7.89733	9.33233	0.240872	chr3R	20076406	20076522	117	-	35	94	52	28	0.35	0.3643	0.208	0.1466	-0.100768
slo	intronretention_Junction_66074	intronretentionleft-Junction_66074	J001	0.0208232	35.4786	2.57863e-09	1.01568e-06	13.7478	11.6875	-0.234237	chr3R	20500291	20500490	200	+	62	253	349	262	0.3804	0.3273	0.683	0.6823
slo	intronretention_Junction_66074	intronretentionleft-Junction_66074	J002	0.020831	35.4678	2.59297e-09	1.01568e-06	11.4701	13.5559	0.24104	chr3R	20500221	20500339	119	+	101	520	162	122	0.6196	0.6727	0.317	0.3177
slo	intronretention_Junction_66074	intronretentionright-Junction_66074	J001	0.0743761	14.5591	0.00013583	0.00703597	13.8976	11.5104	-0.2719	chr3R	20500291	20500490	200	+	62	253	349	262	0.1619	0.2932	0.5629	0.5848
slo	intronretention_Junction_66074	intronretentionright-Junction_66074	J002	0.0742176	14.588	0.000133764	0.00697712	13.0175	15.3678	0.239453	chr3R	20500443	20500563	121	+	321	610	271	186	0.8381	0.7068	0.4371	0.4152	-0.289242
slo	intronretention_Junction_66076	intronretentionleft-Junction_66076	J001	0.0495234	25.1273	5.36665e-07	8.68996e-05	14.9094	12.375	-0.268798	chr3R	20500603	20500887	285	+	105	300	471	347	0.3302	0.4167	0.7983	0.7214
slo	intronretention_Junction_66076	intronretentionleft-Junction_66076	J002	0.0495628	25.1092	5.4175e-07	8.73789e-05	11.4393	14.0191	0.293388	chr3R	20500534	20500651	118	+	213	420	119	134	0.6698	0.5833	0.2017	0.2786
slo	intronretention_Junction_66076	intronretentionright-Junction_66076	J001	0.0524862	13.9253	0.000190216	0.00914016	14.6058	12.6741	-0.204661	chr3R	20500603	20500887	285	+	105	300	471	347	0.4286	0.293	0.6551	0.6699
slo	intronretention_Junction_66076	intronretentionright-Junction_66076	J002	0.0524868	13.9252	0.00019023	0.00914016	12.5907	14.5248	0.206165	chr3R	20500840	20500958	119	+	140	724	248	171	0.5714	0.707	0.3449	0.3301	-0.320658
slo	intronretention_Junction_66077	intronretentionleft-Junction_66077	J001	0.0251029	16.0432	6.19128e-05	0.00389632	14.0576	12.5213	-0.166968	chr3R	20501040	20501353	314	+	60	422	363	285	0.297	0.2402	0.4696	0.5053
slo	intronretention_Junction_66077	intronretentionleft-Junction_66077	J002	0.0250214	16.0902	6.03965e-05	0.00383691	14.2297	15.6821	0.140212	chr3R	20500970	20501088	119	+	142	1335	410	279	0.703	0.7598	0.5304	0.4947
slo	intronretention_Junction_66077	intronretentionright-Junction_66077	J001	0.0368694	40.7823	1.70168e-10	9.20897e-08	14.6597	11.9003	-0.300855	chr3R	20501040	20501353	314	+	60	422	363	285	0.146	0.2113	0.5902	0.5769
slo	intronretention_Junction_66077	intronretentionright-Junction_66077	J002	0.0367516	40.8988	1.6032e-10	8.79174e-08	13.6377	16.2952	0.256844	chr3R	20501306	20501427	122	+	351	1575	252	209	0.854	0.7887	0.4098	0.4231	-0.232557
slo	intronretention_Junction_66125	intronretentionleft-Junction_66125	J001	0.0415167	5.0449	0.0246985	0.220784	9.38104	8.1978	-0.194512	chr3R	20521139	20521811	673	+	11	28	180	124	0.3235	0.209	0.3956	0.4526
slo	intronretention_Junction_66125	intronretentionleft-Junction_66125	J002	0.0411599	5.07889	0.0242188	0.218778	10.3113	11.3432	0.137603	chr3R	20521067	20521187	121	+	23	106	275	150	0.6765	0.791	0.6044	0.5474
slo	intronretention_Junction_66125	intronretentionright-Junction_66125	J001	0.0348117	43.7861	3.663e-11	2.24859e-08	10.1461	7.47872	-0.440057	chr3R	20521139	20521811	673	+	11	28	180	124	0.4583	0.3944	0.9045	0.8986
slo	intronretention_Junction_66125	intronretentionright-Junction_66125	J002	0.0370163	42.3561	7.60769e-11	4.28626e-08	4.6356	8.3696	0.852402	chr3R	20521764	20521853	90	+	13	43	19	14	0.5417	0.6056	0.0955	0.1014	-0.177738
CG3744	intronretention_Junction_66324	intronretentionleft-Junction_66324	J001	0.046777	10.051	0.00152265	0.0396863	8.0907	9.62108	0.249935	chr3R	20698971	20699079	109	-	41	141	37	33	0.7736	0.6558	0.4302	0.4024
CG3744	intronretention_Junction_66324	intronretentionleft-Junction_66324	J002	0.0474976	9.95642	0.00160289	0.0410662	9.01245	7.38416	-0.287484	chr3R	20698898	20699019	122	-	12	74	49	49	0.2264	0.3442	0.5698	0.5976
CG3744	intronretention_Junction_66324	intronretentionright-Junction_66324	J001	0.029449	7.01828	0.00806815	0.117756	8.32783	9.37354	0.170654	chr3R	20698971	20699079	109	-	41	141	37	33	0.7455	0.746	0.5286	0.5593
CG3744	intronretention_Junction_66324	intronretentionright-Junction_66324	J002	0.0304547	6.89277	0.0086545	0.122469	7.86695	6.54513	-0.265381	chr3R	20699032	20699144	113	-	14	48	33	26	0.2545	0.254	0.4714	0.4407	0.244468
Unc-13-4B	intronretention_Junction_66506	intronretentionleft-Junction_66506	J001	0.100997	5.69905	0.0169741	0.180115	11.3495	9.94243	-0.190964	chr3R	20889599	20889655	57	+	144	67	67	63	0.5496	0.4718	0.6837	0.863
Unc-13-4B	intronretention_Junction_66506	intronretentionleft-Junction_66506	J002	0.101386	5.68206	0.0171392	0.181073	8.03974	9.49826	0.240515	chr3R	20889533	20889647	115	+	118	75	31	10	0.4504	0.5282	0.3163	0.137
Unc-13-4B	intronretention_Junction_66506	intronretentionright-Junction_66506	J001	0.0268851	6.64639	0.00993569	0.131778	10.9628	10.1022	-0.117957	chr3R	20889599	20889655	57	+	144	67	67	63	0.6575	0.6569	0.8072	0.8289
Unc-13-4B	intronretention_Junction_66506	intronretentionright-Junction_66506	J002	0.0274317	6.57848	0.0103219	0.134686	6.86082	8.09833	0.239243	chr3R	20889608	20889722	115	+	75	35	16	13	0.3425	0.3431	0.1928	0.1711	-0.194042
gpp	intronretention_Junction_67574	intronretentionleft-Junction_67574	J001	0.0310293	11.9997	0.000532097	0.0191142	8.67835	6.93939	-0.322611	chr3R	2232813	2233198	386	+	22	38	52	37	0.2472	0.2	0.4815	0.4458
gpp	intronretention_Junction_67574	intronretentionleft-Junction_67574	J002	0.0302358	12.1949	0.000479202	0.0178491	9.06104	10.4442	0.204956	chr3R	2232745	2232861	117	+	67	152	56	46	0.7528	0.8	0.5185	0.5542
gpp	intronretention_Junction_67574	intronretentionright-Junction_67574	J001	0.0254216	16.0888	6.04394e-05	0.00383691	8.80417	6.80203	-0.372222	chr3R	2232813	2233198	386	+	22	38	52	37	0.1982	0.1979	0.4602	0.4512
gpp	intronretention_Junction_67574	intronretentionright-Junction_67574	J002	0.0246727	16.3603	5.23721e-05	0.00349767	9.28939	10.7809	0.214821	chr3R	2233151	2233255	105	+	89	154	61	45	0.8018	0.8021	0.5398	0.5488	-0.268468
CG17325	intronretention_Junction_6779	intronretentionleft-Junction_6779	J001	0.151711	6.77804	0.00922863	0.126606	15.2037	11.9417	-0.348405	chr2L	18813143	18813296	154	+	89	21	639	966	0.1089	0.3182	0.4878	0.5355
CG17325	intronretention_Junction_6779	intronretentionleft-Junction_6779	J002	0.151575	6.78418	0.00919692	0.126339	14.9976	18.256	0.283638	chr2L	18813070	18813191	122	+	728	45	671	838	0.8911	0.6818	0.5122	0.4645
CG17325	intronretention_Junction_6779	intronretentionright-Junction_6779	J001	0.0841122	4.7774	0.0288357	0.242266	14.5592	12.4792	-0.222403	chr2L	18813143	18813296	154	+	89	21	639	966	0.2342	0.42	0.4919	0.5812
CG17325	intronretention_Junction_6779	intronretentionright-Junction_6779	J002	0.0840872	4.77883	0.0288117	0.242132	14.0143	16.0764	0.198039	chr2L	18813249	18813370	122	+	291	29	660	696	0.7658	0.58	0.5081	0.4188	-0.336984
CG3348	intronretention_Junction_68222	intronretentionleft-Junction_68222	J001	0.0323103	25.6599	4.07196e-07	6.7804e-05	9.8928	7.43131	-0.412762	chr3R	23117715	23117846	132	-	36	28	57	78	0.2707	0.2276	0.6	0.661
CG3348	intronretention_Junction_68222	intronretentionleft-Junction_68222	J002	0.0319245	25.8565	3.67759e-07	6.1737e-05	8.35241	10.6062	0.344647	chr3R	23117659	23117763	105	-	97	95	38	40	0.7293	0.7724	0.4	0.339
CG3348	intronretention_Junction_68222	intronretentionright-Junction_68222	J001	0.0297258	55.8471	7.83316e-14	7.84506e-11	10.4902	6.87812	-0.608962	chr3R	23117715	23117846	132	-	36	28	57	78	0.2209	0.2295	0.75	0.7959
CG3348	intronretention_Junction_68222	intronretentionright-Junction_68222	J002	0.0293018	56.3203	6.15755e-14	6.33134e-11	7.08514	10.6017	0.581426	chr3R	23117799	23117895	97	-	127	94	19	20	0.7791	0.7705	0.25	0.2041	-0.374511
unc80	intronretention_Junction_68523	intronretentionleft-Junction_68523	J001	0.0536678	4.7408	0.0294553	0.245385	11.6309	10.5656	-0.138578	chr3R	23501053	23501432	380	+	21	147	218	199	0.3889	0.5365	0.6412	0.6982
unc80	intronretention_Junction_68523	intronretentionleft-Junction_68523	J002	0.0540168	4.71888	0.0298331	0.247114	9.60192	10.7106	0.157641	chr3R	23500991	23501101	111	+	33	127	122	86	0.6111	0.4635	0.3588	0.3018
unc80	intronretention_Junction_68523	intronretentionright-Junction_68523	J001	0.0294938	11.169	0.000831758	0.0261338	11.7693	10.4942	-0.165432	chr3R	23501053	23501432	380	+	21	147	218	199	0.5385	0.5976	0.7758	0.8089
unc80	intronretention_Junction_68523	intronretentionright-Junction_68523	J002	0.0301753	11.0079	0.000907234	0.0278723	7.99303	9.57329	0.260271	chr3R	23501385	23501492	108	+	18	99	63	47	0.4615	0.4024	0.2242	0.1911	-0.172669
CG1646	intronretention_Junction_69812	intronretentionleft-Junction_69812	J001	0.0336331	4.98143	0.0256208	0.225983	9.0986	8.0401	-0.178432	chr3R	24641815	24641873	59	+	20	76	53	56	0.3846	0.2969	0.5146	0.4912
CG1646	intronretention_Junction_69812	intronretentionleft-Junction_69812	J002	0.0332041	5.02897	0.0249268	0.221908	9.07861	10.0347	0.144456	chr3R	24641764	24641863	100	+	32	180	50	58	0.6154	0.7031	0.4854	0.5088
CG1646	intronretention_Junction_69812	intronretentionright-Junction_69812	J001	0.0394937	5.98288	0.0144454	0.164441	9.21634	7.92514	-0.217757	chr3R	24641815	24641873	59	+	20	76	53	56	0.1695	0.2508	0.3786	0.3836
CG1646	intronretention_Junction_69812	intronretentionright-Junction_69812	J002	0.0385972	6.07475	0.0137128	0.159635	10.5931	11.6614	0.138619	chr3R	24641826	24641936	111	+	98	227	87	90	0.8305	0.7492	0.6214	0.6164	-0.162462
Vha100-1	intronretention_Junction_70124	intronretentionleft-Junction_70124	J001	0.171577	6.36214	0.0116581	0.143903	14.6829	12.7062	-0.208602	chr3R	24962421	24962625	205	+	23	367	607	600	0.1513	0.3472	0.5626	0.6342
Vha100-1	intronretention_Junction_70124	intronretentionleft-Junction_70124	J002	0.171552	6.363	0.0116524	0.143897	13.4794	15.4566	0.197464	chr3R	24962351	24962469	119	+	129	690	472	346	0.8487	0.6528	0.4374	0.3658
Vha100-1	intronretention_Junction_70124	intronretentionright-Junction_70124	J001	0.0772819	11.8	0.0005923	0.0206267	14.6537	12.7921	-0.196014	chr3R	24962421	24962625	205	+	23	367	607	600	0.6765	0.8379	0.9382	0.9539
Vha100-1	intronretention_Junction_70124	intronretentionright-Junction_70124	J002	0.0800045	11.5227	0.000687526	0.0230646	6.54507	8.75865	0.420298	chr3R	24962578	24962669	92	+	11	71	40	29	0.3235	0.1621	0.0618	0.0461	-0.358969
Vha100-1	intronretention_Junction_70129	intronretentionleft-Junction_70129	J001	0.119974	12.3895	0.000431745	0.0166917	14.5034	12.1485	-0.255611	chr3R	24962632	24962796	165	+	22	293	546	582	0.5946	0.83	0.9496	0.9557
Vha100-1	intronretention_Junction_70129	intronretentionleft-Junction_70129	J002	0.123495	12.1108	0.00050131	0.0184227	6.10042	8.66206	0.505801	chr3R	24962587	24962680	94	+	15	60	29	27	0.4054	0.17	0.0504	0.0443
Vha100-1	intronretention_Junction_70129	intronretentionright-Junction_70129	J001	0.0201075	30.3338	3.63734e-08	9.58975e-06	14.3503	12.5306	-0.195617	chr3R	24962632	24962796	165	+	22	293	546	582	0.2895	0.3447	0.6424	0.6306
Vha100-1	intronretention_Junction_70129	intronretentionright-Junction_70129	J002	0.0201343	30.3029	3.69575e-08	9.68168e-06	12.6755	14.4851	0.192529	chr3R	24962749	24962863	115	+	54	557	304	341	0.7105	0.6553	0.3576	0.3694	-0.149288
Fer2LCH	intronretention_Junction_71242	intronretentionleft-Junction_71242	J001	0.138995	6.90824	0.00857992	0.122004	12.3322	14.3677	0.220393	chr3R	26215164	26215417	254	+	233	999	121	122	0.8893	0.9587	0.6954	0.8079
Fer2LCH	intronretention_Junction_71242	intronretentionleft-Junction_71242	J002	0.141482	6.7949	0.00914185	0.126077	9.14373	7.02633	-0.380011	chr3R	26215122	26215212	91	+	29	43	53	29	0.1107	0.0413	0.3046	0.1921
Fer2LCH	intronretention_Junction_71242	intronretentionright-Junction_71242	J001	0.0332363	26.0644	3.30209e-07	5.65882e-05	12.2678	14.4412	0.235309	chr3R	26215164	26215417	254	+	233	999	121	122	0.4191	0.5152	0.1751	0.1824
Fer2LCH	intronretention_Junction_71242	intronretentionright-Junction_71242	J002	0.033183	26.1029	3.23704e-07	5.57056e-05	16.8716	14.809	-0.188128	chr3R	26215370	26215475	106	+	323	940	570	547	0.5809	0.4848	0.8249	0.8176	0.103117
dj-1beta	intronretention_Junction_71488	intronretentionleft-Junction_71488	J001	0.0232508	6.40496	0.0113802	0.141964	11.6093	10.6489	-0.124577	chr3R	26633006	26633068	63	+	39	268	123	108	0.4588	0.4214	0.5802	0.6171
dj-1beta	intronretention_Junction_71488	intronretentionleft-Junction_71488	J002	0.0232406	6.40705	0.0113668	0.141926	10.4567	11.4311	0.128536	chr3R	26632933	26633054	122	+	46	368	89	67	0.5412	0.5786	0.4198	0.3829
dj-1beta	intronretention_Junction_71488	intronretentionright-Junction_71488	J001	0.0222628	9.3344	0.00224892	0.0518765	11.6726	10.5913	-0.140256	chr3R	26633006	26633068	63	+	39	268	123	108	0.5132	0.5286	0.7235	0.7013
dj-1beta	intronretention_Junction_71488	intronretentionright-Junction_71488	J002	0.022432	9.28878	0.00230562	0.0526821	9.06904	10.3174	0.186058	chr3R	26633021	26633141	121	+	37	239	47	46	0.4868	0.4714	0.2765	0.2987	-0.137813
CG2993	intronretention_Junction_72914	intronretentionleft-Junction_72914	J001	0.0253025	6.03078	0.0140585	0.161965	12.4154	11.4333	-0.118886	chr3R	3632492	3632632	141	-	31	258	220	211	0.5439	0.4708	0.6414	0.6656
CG2993	intronretention_Junction_72914	intronretentionleft-Junction_72914	J002	0.0254306	6.00507	0.0142648	0.16338	10.5521	11.5945	0.135914	chr3R	3632427	3632540	114	-	26	290	123	106	0.4561	0.5292	0.3586	0.3344
CG2993	intronretention_Junction_72914	intronretentionright-Junction_72914	J001	0.0341344	6.11308	0.0134185	0.157555	12.3926	11.4197	-0.117948	chr3R	3632492	3632632	141	-	31	258	220	211	0.5082	0.6202	0.7509	0.7404
CG2993	intronretention_Junction_72914	intronretentionright-Junction_72914	J002	0.0345972	6.05875	0.0138376	0.160362	9.2822	10.3907	0.162755	chr3R	3632585	3632689	105	-	30	158	73	74	0.4918	0.3798	0.2491	0.2596	-0.118013
CG9775	intronretention_Junction_73809	intronretentionleft-Junction_73809	J001	0.0614453	11.4487	0.000715437	0.0237109	16.9454	15.2683	-0.150355	chr3R	464131	464264	134	-	102	1109	952	881	0.3208	0.4652	0.6611	0.7163
CG9775	intronretention_Junction_73809	intronretentionleft-Junction_73809	J002	0.0614722	11.444	0.000717251	0.0237143	14.5359	16.2211	0.158252	chr3R	464063	464179	117	-	216	1275	488	349	0.6792	0.5348	0.3389	0.2837
CG9775	intronretention_Junction_73809	intronretentionright-Junction_73809	J001	0.0232106	11.174	0.000829495	0.0261028	16.6609	15.6065	-0.0943227	chr3R	464131	464264	134	-	102	1109	952	881	0.2865	0.3511	0.4956	0.5092
CG9775	intronretention_Junction_73809	intronretentionright-Junction_73809	J002	0.0231939	11.1811	0.000826332	0.0260457	16.6304	17.667	0.0872319	chr3R	464217	464337	121	-	254	2050	969	849	0.7135	0.6489	0.5044	0.4908	-0.254982
rump	intronretention_Junction_74660	intronretentionleft-Junction_74660	J001	0.0333292	4.85365	0.0275877	0.236534	17.0974	16.1226	-0.0846944	chr3R	5331921	5331978	58	-	512	976	772	633	0.471	0.5625	0.6401	0.6763
rump	intronretention_Junction_74660	intronretentionleft-Junction_74660	J002	0.0333438	4.85164	0.0276199	0.236663	15.1175	16.105	0.0912898	chr3R	5331849	5331969	121	-	575	759	434	303	0.529	0.4375	0.3599	0.3237
rump	intronretention_Junction_74660	intronretentionright-Junction_74660	J001	0.0263036	5.94219	0.0147826	0.166452	17.047	16.1674	-0.0764248	chr3R	5331921	5331978	58	-	512	976	772	633	0.6002	0.6408	0.7222	0.7701
rump	intronretention_Junction_74660	intronretentionright-Junction_74660	J002	0.026357	5.93127	0.0148745	0.166969	13.8021	14.727	0.0935749	chr3R	5331931	5332049	119	-	341	547	297	189	0.3998	0.3592	0.2778	0.2299	-0.11352
CR44018	intronretention_Junction_75871	intronretentionleft-Junction_75871	J001	0.031388	10.0934	0.00148803	0.038932	7.76167	5.953	-0.382751	chr3R	6465150	6465232	83	+	16	17	38	36	0.1951	0.156	0.3878	0.3871
CR44018	intronretention_Junction_75871	intronretentionleft-Junction_75871	J002	0.0300967	10.3234	0.00131355	0.0357545	8.99774	10.2497	0.187948	chr3R	6465087	6465198	112	+	66	92	60	57	0.8049	0.844	0.6122	0.6129
CR44018	intronretention_Junction_75871	intronretentionright-Junction_75871	J001	0.0330987	11.8531	0.000575665	0.0202735	7.83629	5.89666	-0.410272	chr3R	6465150	6465232	83	+	16	17	38	36	0.2319	0.2394	0.4935	0.5455
CR44018	intronretention_Junction_75871	intronretentionright-Junction_75871	J002	0.0321201	12.0347	0.000522205	0.0188798	7.64325	9.19059	0.265971	chr3R	6465185	6465279	95	+	53	54	39	30	0.7681	0.7606	0.5065	0.4545	-0.260296
Gel	intronretention_Junction_76058	intronretentionleft-Junction_76058	J001	0.143124	6.44709	0.0111134	0.140425	14.9448	12.4231	-0.266615	chr3R	66436	66598	163	+	169	301	308	317	0.1516	0.3348	0.4798	0.624
Gel	intronretention_Junction_76058	intronretentionleft-Junction_76058	J002	0.142886	6.45761	0.0110478	0.139924	14.3589	16.8738	0.232842	chr3R	66364	66484	121	+	946	598	334	191	0.8484	0.6652	0.5202	0.376
Gel	intronretention_Junction_76058	intronretentionright-Junction_76058	J001	0.155268	7.66033	0.00564483	0.0939183	15.1381	12.2351	-0.30716	chr3R	66436	66598	163	+	169	301	308	317	0.1759	0.4079	0.6051	0.7092
Gel	intronretention_Junction_76058	intronretentionright-Junction_76058	J002	0.155058	7.67046	0.0056132	0.0936306	13.1749	16.074	0.28694	chr3R	66551	66671	121	+	792	437	201	130	0.8241	0.5921	0.3949	0.2908	-0.326
CG42394	intronretention_Junction_76078	intronretentionleft-Junction_76078	J001	0.0306706	8.74887	0.00309794	0.0642862	8.1422	6.25346	-0.380763	chr3R	6677210	6677261	52	+	41	21	23	21	0.0656	0.0511	0.1402	0.1419
CG42394	intronretention_Junction_76078	intronretentionleft-Junction_76078	J002	0.0291856	8.99155	0.00271231	0.0590134	13.3337	14.4111	0.112098	chr3R	6677139	6677258	120	+	584	390	141	127	0.9344	0.9489	0.8598	0.8581
CG42394	intronretention_Junction_76078	intronretentionright-Junction_76078	J001	0.030087	3.87121	0.049121	0.320707	7.87853	6.4839	-0.281065	chr3R	6677210	6677261	52	+	41	21	23	21	0.0972	0.0917	0.1484	0.1875
CG42394	intronretention_Junction_76078	intronretentionright-Junction_76078	J002	0.0287077	3.97039	0.0463069	0.312223	12.4673	13.2843	0.0915681	chr3R	6677214	6677335	122	+	381	208	132	91	0.9028	0.9083	0.8516	0.8125	-0.137082
CG31441	intronretention_Junction_76349	intronretentionleft-Junction_76349	J001	0.0316384	9.2823	0.00231379	0.0528102	10.584	9.39993	-0.17116	chr3R	7063062	7063120	59	+	16	81	172	140	0.5517	0.6136	0.789	0.8187
CG31441	intronretention_Junction_76349	intronretentionleft-Junction_76349	J002	0.0328395	9.09132	0.00256825	0.0567596	6.786	8.35038	0.299282	chr3R	7062989	7063110	122	+	13	51	46	31	0.4483	0.3864	0.211	0.1813
CG31441	intronretention_Junction_76349	intronretentionright-Junction_76349	J001	0.055976	7.52449	0.00608659	0.0985043	10.6188	9.32647	-0.187222	chr3R	7063062	7063120	59	+	16	81	172	140	0.5714	0.6864	0.823	0.8805
CG31441	intronretention_Junction_76349	intronretentionright-Junction_76349	J002	0.0587901	7.30824	0.0068639	0.106813	6.03838	7.68692	0.348243	chr3R	7063073	7063189	117	+	12	37	37	19	0.4286	0.3136	0.177	0.1195	-0.155349
CG12213	intronretention_Junction_77202	intronretentionleft-Junction_77202	J001	0.0492302	8.76271	0.00307452	0.0639875	5.77053	3.78703	-0.607638	chr3R	7792008	7792175	168	-	2	9	25	13	0.1111	0.0776	0.2907	0.2766
CG12213	intronretention_Junction_77202	intronretentionleft-Junction_77202	J002	0.0434255	9.34118	0.00224062	0.0517913	8.03127	9.14219	0.186911	chr3R	7791961	7792056	96	-	16	107	61	34	0.8889	0.9224	0.7093	0.7234
CG12213	intronretention_Junction_77202	intronretentionright-Junction_77202	J001	0.0571813	3.81752	0.0507194	0.324863	5.41749	4.05904	-0.416486	chr3R	7792008	7792175	168	-	2	9	25	13	0.1333	0.0486	0.1603	0.1368
CG12213	intronretention_Junction_77202	intronretentionright-Junction_77202	J002	0.0490458	4.23981	0.0394865	0.288104	9.81903	10.5343	0.101442	chr3R	7792128	7792248	121	-	13	176	131	82	0.8667	0.9514	0.8397	0.8632	-0.269892
CG5196	intronretention_Junction_77562	intronretentionleft-Junction_77562	J001	0.087346	8.86869	0.00290103	0.0617333	10.3078	7.7559	-0.410374	chr3R	8237365	8237418	54	+	38	45	53	80	0.0163	0.0365	0.0756	0.0998
CG5196	intronretention_Junction_77562	intronretentionleft-Junction_77562	J002	0.0858973	9.00394	0.00269398	0.0587803	17.2675	19.5794	0.181279	chr3R	8237294	8237413	120	+	2297	1189	648	722	0.9837	0.9635	0.9244	0.9002
CG5196	intronretention_Junction_77562	intronretentionright-Junction_77562	J001	0.0976519	8.40313	0.00374576	0.0726352	10.2964	7.78157	-0.404005	chr3R	8237365	8237418	54	+	38	45	53	80	0.0284	0.0564	0.1082	0.1826
CG5196	intronretention_Junction_77562	intronretentionright-Junction_77562	J002	0.0961659	8.52171	0.00350935	0.0695261	15.564	17.8925	0.201142	chr3R	8237371	8237470	100	+	1300	753	437	358	0.9716	0.9436	0.8918	0.8174	-0.109798
CG5608	intronretention_Junction_77632	intronretentionleft-Junction_77632	J001	0.0984345	13.2636	0.000270606	0.0119418	6.84303	9.36617	0.452824	chr3R	8288524	8288576	53	-	24	107	33	25	0.5	0.7279	0.1919	0.2381
CG5608	intronretention_Junction_77632	intronretentionleft-Junction_77632	J002	0.0975355	13.3695	0.000255754	0.011446	10.4125	7.98038	-0.383787	chr3R	8288471	8288572	102	-	24	40	139	80	0.5	0.2721	0.8081	0.7619
CG5608	intronretention_Junction_77632	intronretentionright-Junction_77632	J001	0.0324705	28.4972	9.38354e-08	1.99967e-05	6.84399	9.41405	0.459978	chr3R	8288524	8288576	53	-	24	107	33	25	0.6316	0.6524	0.2089	0.2551
CG5608	intronretention_Junction_77632	intronretentionright-Junction_77632	J002	0.032087	28.7113	8.40112e-08	1.8282e-05	10.1283	7.8038	-0.376141	chr3R	8288529	8288640	112	-	14	57	125	73	0.3684	0.3476	0.7911	0.7449	0.40131
B52	intronretention_Junction_78429	intronretentionleft-Junction_78429	J001	0.0512389	3.91034	0.0479899	0.317672	10.0148	11.087	0.146733	chr3R	9488773	9489175	403	+	102	191	56	68	0.4163	0.3399	0.1911	0.2798
B52	intronretention_Junction_78429	intronretentionleft-Junction_78429	J002	0.0509558	3.92876	0.0474668	0.315887	13.5038	12.5083	-0.11048	chr3R	9488710	9488821	112	+	143	371	237	175	0.5837	0.6601	0.8089	0.7202
B52	intronretention_Junction_78429	intronretentionright-Junction_78429	J001	0.0226254	4.42598	0.0353959	0.271502	10.1308	10.9006	0.105661	chr3R	9488773	9489175	403	+	102	191	56	68	0.4113	0.4636	0.32	0.3105
B52	intronretention_Junction_78429	intronretentionright-Junction_78429	J002	0.0224987	4.44434	0.0350171	0.269872	12.4124	11.7325	-0.0812725	chr3R	9489128	9489248	121	+	146	221	119	151	0.5887	0.5364	0.68	0.6895	0.168492
CG9922	intronretention_Junction_78759	intronretentionleft-Junction_78759	J001	0.0643569	4.38526	0.0362509	0.275086	9.37988	10.5437	0.16874	chr3R	9861000	9861164	165	-	62	206	61	44	0.6596	0.5	0.3389	0.4
CG9922	intronretention_Junction_78759	intronretentionleft-Junction_78759	J002	0.0643479	4.38573	0.0362409	0.27506	10.976	9.82901	-0.159232	chr3R	9860932	9861048	117	-	32	206	119	66	0.3404	0.5	0.6611	0.6
CG9922	intronretention_Junction_78759	intronretentionright-Junction_78759	J001	0.026323	6.86403	0.00879478	0.123585	9.43861	10.4849	0.151672	chr3R	9861000	9861164	165	-	62	206	61	44	0.62	0.5937	0.4485	0.3894
CG9922	intronretention_Junction_78759	intronretentionright-Junction_78759	J002	0.0264292	6.84641	0.00888197	0.124104	10.3495	9.28597	-0.156436	chr3R	9861117	9861232	116	-	38	141	75	69	0.38	0.4063	0.5515	0.6106	0.191943
pan	intronretention_Junction_79649	intronretentionleft-Junction_79649	J001	0.0390493	8.50383	0.00354399	0.0699092	13.3876	12.0745	-0.148935	chr4	115241	115461	221	+	57	270	285	324	0.2426	0.2772	0.4066	0.5086
pan	intronretention_Junction_79649	intronretentionleft-Junction_79649	J002	0.0389457	8.52378	0.00350537	0.0695158	13.8892	15.1476	0.125123	chr4	115172	115289	118	+	178	704	416	313	0.7574	0.7228	0.5934	0.4914
pan	intronretention_Junction_79649	intronretentionright-Junction_79649	J001	0.0431425	7.23094	0.00716577	0.109725	13.3491	12.1091	-0.140649	chr4	115241	115461	221	+	57	270	285	324	0.4385	0.4972	0.6278	0.7232
pan	intronretention_Junction_79649	intronretentionright-Junction_79649	J002	0.0432541	7.21524	0.00722872	0.110237	11.1412	12.4196	0.15671	chr4	115414	115530	117	+	73	273	169	124	0.5615	0.5028	0.3722	0.2768	-0.213948
CG33521	intronretention_Junction_79792	intronretentionleft-Junction_79792	J001	0.12004	11.6877	0.000629142	0.0215454	3.82125	6.56363	0.780451	chr4	1212932	1212981	50	+	27	44	4	3	0.6585	0.4151	0.093	0.1304
CG33521	intronretention_Junction_79792	intronretentionleft-Junction_79792	J002	0.118733	11.7668	0.000602956	0.0209098	8.63129	6.20056	-0.477179	chr4	1212885	1212980	96	+	14	62	39	20	0.3415	0.5849	0.907	0.8696
CG33521	intronretention_Junction_79792	intronretentionright-Junction_79792	J001	0.21256	6.61563	0.0101088	0.132948	4.02115	6.32711	0.653938	chr4	1212932	1212981	50	+	27	44	4	3	0.8438	0.5176	0.1739	0.25
CG33521	intronretention_Junction_79792	intronretentionright-Junction_79792	J002	0.216436	6.53734	0.0105633	0.136407	6.97619	4.65477	-0.583731	chr4	1212934	1213030	97	+	5	41	19	9	0.1562	0.4824	0.8261	0.75	0.489901
Dyrk3	intronretention_Junction_79869	intronretentionleft-Junction_79869	J001	0.0535695	5.16788	0.0230082	0.213469	5.9908	4.11595	-0.541523	chr4	1234146	1234226	81	-	4	4	31	33	0.0851	0.08	0.1834	0.2558
Dyrk3	intronretention_Junction_79869	intronretentionleft-Junction_79869	J002	0.049726	5.34674	0.0207611	0.20153	9.30695	10.4013	0.160385	chr4	1234100	1234194	95	-	43	46	138	96	0.9149	0.92	0.8166	0.7442
Dyrk3	intronretention_Junction_79869	intronretentionright-Junction_79869	J001	0.0462926	5.53574	0.0186319	0.189259	6.14021	3.98566	-0.62347	chr4	1234146	1234226	81	-	4	4	31	33	0.0184	0.0192	0.0463	0.0635
Dyrk3	intronretention_Junction_79869	intronretentionright-Junction_79869	J002	0.0418971	5.79127	0.016106	0.175198	14.103	15.0907	0.0976528	chr4	1234179	1234299	121	-	213	204	638	487	0.9816	0.9808	0.9537	0.9365	-0.206198
pan	intronretention_Junction_80078	intronretentionleft-Junction_80078	J001	0.0695386	15.2739	9.29903e-05	0.00531194	3.15787	6.02663	0.932399	chr4	128998	129051	54	+	13	13	5	5	0.0963	0.0516	0.0088	0.0109
pan	intronretention_Junction_80078	intronretentionleft-Junction_80078	J002	0.0612243	16.3263	5.33179e-05	0.00353695	14.689	13.2004	-0.154152	chr4	128929	129046	118	+	122	239	562	453	0.9037	0.9484	0.9912	0.9891
pan	intronretention_Junction_80078	intronretentionright-Junction_80078	J001	0.049526	8.66506	0.00324369	0.0661945	3.49742	5.4516	0.640388	chr4	128998	129051	54	+	13	13	5	5	0.104	0.0812	0.0196	0.0296
pan	intronretention_Junction_80078	intronretentionright-Junction_80078	J002	0.042734	9.24028	0.00236749	0.0537079	12.6487	11.8164	-0.0982072	chr4	129004	129099	96	+	112	147	250	164	0.896	0.9188	0.9804	0.9704	0.117354
CG31999	intronretention_Junction_80462	intronretentionleft-Junction_80462	J001	0.0433493	24.0136	9.56569e-07	0.000137562	9.07924	6.7634	-0.424825	chr4	239006	239070	65	-	27	28	47	47	0.4154	0.5	0.8704	0.8868
CG31999	intronretention_Junction_80462	intronretentionleft-Junction_80462	J002	0.0441748	23.7914	1.07359e-06	0.000152788	4.35939	7.43019	0.769271	chr4	238958	239054	97	-	38	28	7	6	0.5846	0.5	0.1296	0.1132
CG31999	intronretention_Junction_80462	intronretentionright-Junction_80462	J001	0.0326538	8.03883	0.00457852	0.0832188	8.49413	7.23124	-0.232223	chr4	239006	239070	65	-	27	28	47	47	0.45	0.4308	0.7121	0.662
CG31999	intronretention_Junction_80462	intronretentionright-Junction_80462	J002	0.0329395	8.00348	0.00466874	0.0842935	6.48853	7.88107	0.280499	chr4	239023	239133	111	-	33	37	19	24	0.55	0.5692	0.2879	0.338	-0.308535
lgs	intronretention_Junction_81383	intronretentionleft-Junction_81383	J001	0.10208	12.4289	0.000422733	0.016449	2.25614	5.25641	1.22022	chr4	464109	464170	62	-	13	17	1	2	0.1074	0.0536	0.0041	0.0108
lgs	intronretention_Junction_81383	intronretentionleft-Junction_81383	J002	0.0905706	13.1784	0.000283202	0.0123388	13.5243	11.8485	-0.19086	chr4	464050	464157	108	-	108	300	242	183	0.8926	0.9464	0.9959	0.9892
lgs	intronretention_Junction_81383	intronretentionright-Junction_81383	J001	0.0945653	7.79387	0.00524239	0.0895408	2.4723	4.84712	0.97127	chr4	464109	464170	62	-	13	17	1	2	0.1711	0.0944	0.0111	0.0333
lgs	intronretention_Junction_81383	intronretentionright-Junction_81383	J002	0.0837123	8.22239	0.00413766	0.0778133	10.9359	9.62949	-0.183546	chr4	464123	464219	97	-	63	163	89	58	0.8289	0.9056	0.9889	0.9667	0.13312
CaMKI	intronretention_Junction_81403	intronretentionleft-Junction_81403	J001	0.0451736	7.66329	0.00563558	0.0938403	6.75385	5.27271	-0.357167	chr4	467373	467445	73	+	12	27	17	16	0.4	0.3333	0.68	0.6667
CaMKI	intronretention_Junction_81403	intronretentionleft-Junction_81403	J002	0.0444476	7.71952	0.0054627	0.0921179	5.10071	6.60987	0.373924	chr4	467326	467421	96	+	18	54	8	8	0.6	0.6667	0.32	0.3333
CaMKI	intronretention_Junction_81403	intronretentionright-Junction_81403	J001	0.103723	3.89665	0.0483824	0.318804	6.95964	5.14894	-0.434735	chr4	467373	467445	73	+	12	27	17	16	0.087	0.2077	0.3091	0.3333
CaMKI	intronretention_Junction_81403	intronretentionright-Junction_81403	J002	0.0988059	4.03137	0.0446616	0.305944	8.93635	10.4652	0.227843	chr4	467398	467502	105	+	126	103	38	32	0.913	0.7923	0.6909	0.6667	-0.269048
RpS3A	intronretention_Junction_81992	intronretentionleft-Junction_81992	J001	0.036762	19.6225	9.43496e-06	0.000905482	11.1007	9.18775	-0.272872	chr4	86675	86729	55	-	69	34	131	84	0.4423	0.3656	0.7751	0.7179
RpS3A	intronretention_Junction_81992	intronretentionleft-Junction_81992	J002	0.0369309	19.5611	9.74346e-06	0.000927201	8.01803	10.1014	0.333236	chr4	86620	86723	104	-	87	59	38	33	0.5577	0.6344	0.2249	0.2821
RpS3A	intronretention_Junction_81992	intronretentionright-Junction_81992	J001	0.0322543	13.4689	0.000242548	0.0110351	10.9229	9.31443	-0.229817	chr4	86675	86729	55	-	69	34	131	84	0.3209	0.2576	0.5261	0.5833
RpS3A	intronretention_Junction_81992	intronretentionright-Junction_81992	J002	0.0320525	13.5286	0.000234958	0.0107373	10.3623	11.8617	0.194958	chr4	86682	86795	114	-	146	98	118	60	0.6791	0.7424	0.4739	0.4167	-0.280194
Hk	intronretention_Junction_83236	intronretentionleft-Junction_83236	J001	0.0424368	4.77312	0.0289074	0.242567	11.1333	10.245	-0.119967	chrX	10149623	10152909	3287	-	10	159	174	161	0.137	0.2349	0.324	0.35
Hk	intronretention_Junction_83236	intronretentionleft-Junction_83236	J002	0.0419388	4.81041	0.0282884	0.239607	13.1385	13.9395	0.0853794	chrX	10149552	10149671	120	-	63	518	363	299	0.863	0.7651	0.676	0.65
Hk	intronretention_Junction_83236	intronretentionright-Junction_83236	J001	0.0437274	6.52242	0.0106523	0.137244	11.2473	10.1268	-0.151398	chrX	10149623	10152909	3287	-	10	159	174	161	0.2381	0.3495	0.4847	0.5552
Hk	intronretention_Junction_83236	intronretentionright-Junction_83236	J002	0.0435799	6.53749	0.0105624	0.136407	11.034	12.1115	0.134422	chrX	10152862	10152977	116	-	32	296	185	129	0.7619	0.6505	0.5153	0.4448	-0.193312
sky	intronretention_Junction_8352	intronretentionleft-Junction_8352	J001	0.0302016	9.32437	0.00226127	0.0519892	11.2063	9.99364	-0.165233	chr2L	20877477	20877551	75	-	13	89	280	190	0.4643	0.5633	0.7388	0.7631
sky	intronretention_Junction_8352	intronretentionleft-Junction_8352	J002	0.0308529	9.20866	0.00240873	0.0543735	8.13593	9.56938	0.234119	chr2L	20877411	20877525	115	-	15	69	99	59	0.5357	0.4367	0.2612	0.2369
sky	intronretention_Junction_8352	intronretentionright-Junction_8352	J001	0.156694	7.05519	0.00790359	0.116386	11.5923	9.45675	-0.293746	chr2L	20877477	20877551	75	-	13	89	280	190	0.3939	0.7177	0.8537	0.9005
sky	intronretention_Junction_8352	intronretentionright-Junction_8352	J002	0.160087	6.93444	0.00845517	0.1211	6.34631	8.54919	0.42987	chr2L	20877504	20877622	119	-	20	35	48	21	0.6061	0.2823	0.1463	0.0995	-0.180291
flw	intronretention_Junction_83713	intronretentionleft-Junction_83713	J001	0.0271614	7.50134	0.0061653	0.0992456	12.9538	11.8009	-0.134481	chrX	10301333	10301397	65	+	36	408	226	179	0.507	0.4219	0.6384	0.6259
flw	intronretention_Junction_83713	intronretentionleft-Junction_83713	J002	0.0271887	7.49469	0.00618813	0.0994575	11.3474	12.5276	0.142743	chrX	10301261	10301381	121	+	35	559	128	107	0.493	0.5781	0.3616	0.3741
flw	intronretention_Junction_83713	intronretentionright-Junction_83713	J001	0.0453731	4.14288	0.0418099	0.296381	12.7728	11.9189	-0.0998223	chrX	10301333	10301397	65	+	36	408	226	179	0.48	0.6201	0.729	0.7103
flw	intronretention_Junction_83713	intronretentionright-Junction_83713	J002	0.0456866	4.12271	0.0423113	0.297449	10.0092	10.9285	0.126776	chrX	10301350	10301466	117	+	39	250	84	73	0.52	0.3799	0.271	0.2897	-0.141426
cac	intronretention_Junction_85448	intronretentionleft-Junction_85448	J001	0.0903777	12.27	0.000460303	0.0173961	11.049	8.78275	-0.331166	chrX	11856136	11856261	126	-	19	144	115	79	0.157	0.3057	0.6425	0.5643
cac	intronretention_Junction_85448	intronretentionleft-Junction_85448	J002	0.0898339	12.3325	0.000445149	0.0169367	9.81289	12.0288	0.293742	chrX	11856072	11856184	113	-	102	327	64	61	0.843	0.6943	0.3575	0.4357
cac	intronretention_Junction_85448	intronretentionright-Junction_85448	J001	0.0336935	16.2626	5.51427e-05	0.00359596	10.8213	9.10183	-0.249646	chrX	11856136	11856261	126	-	19	144	115	79	0.2969	0.36	0.615	0.6752
cac	intronretention_Junction_85448	intronretentionright-Junction_85448	J002	0.0335706	16.3026	5.39884e-05	0.00356992	9.19348	10.8978	0.245354	chrX	11856214	11856317	104	-	45	256	72	38	0.7031	0.64	0.385	0.3248	-0.382026
sun	intronretention_Junction_91748	intronretentionleft-Junction_91748	J001	0.0452024	20.1347	7.21759e-06	0.00072403	10.6365	12.9132	0.279834	chrX	15742037	15742329	293	-	163	305	112	69	0.2937	0.2033	0.0768	0.0669
sun	intronretention_Junction_91748	intronretentionleft-Junction_91748	J002	0.0449559	20.2345	6.8507e-06	0.000699162	18.3025	16.2234	-0.173967	chrX	15741968	15742085	118	-	392	1195	1346	963	0.7063	0.7967	0.9232	0.9331
sun	intronretention_Junction_91748	intronretentionright-Junction_91748	J001	0.0385075	9.70068	0.001842	0.0452837	11.058	12.4739	0.173824	chrX	15742037	15742329	293	-	163	305	112	69	0.7799	0.6948	0.5258	0.4964
sun	intronretention_Junction_91748	intronretentionright-Junction_91748	J002	0.0388645	9.6325	0.00191164	0.046449	10.9016	9.35369	-0.22093	chrX	15742282	15742380	99	-	46	134	101	70	0.2201	0.3052	0.4742	0.5036	0.261987
Ranbp16	intronretention_Junction_92060	intronretentionleft-Junction_92060	J001	0.217133	5.34964	0.0207265	0.201384	12.3303	9.89143	-0.317962	chrX	15822963	15823204	242	-	29	212	155	149	0.0241	0.1094	0.2061	0.238
Ranbp16	intronretention_Junction_92060	intronretentionleft-Junction_92060	J002	0.216014	5.37609	0.0204145	0.199723	16.1169	18.5742	0.204727	chrX	15822891	15823011	121	-	1175	1725	597	477	0.9759	0.8906	0.7939	0.762
Ranbp16	intronretention_Junction_92060	intronretentionright-Junction_92060	J001	0.0880168	5.51739	0.0188284	0.190268	11.8501	10.3967	-0.188771	chrX	15822963	15823204	242	-	29	212	155	149	0.1374	0.2647	0.3717	0.4543
Ranbp16	intronretention_Junction_92060	intronretentionright-Junction_92060	J002	0.0875752	5.54171	0.0185685	0.188801	12.9226	14.3346	0.14961	chrX	15823157	15823277	121	-	182	589	262	179	0.8626	0.7353	0.6283	0.5457	-0.240981
Ranbp16	intronretention_Junction_92066	intronretentionleft-Junction_92066	J001	0.104905	6.73405	0.00945898	0.128432	12.2027	10.4756	-0.22017	chrX	15823291	15823372	82	-	24	210	183	190	0.1057	0.2303	0.3617	0.4524
Ranbp16	intronretention_Junction_92066	intronretentionleft-Junction_92066	J002	0.104427	6.76158	0.00931411	0.127308	13.3406	15.0331	0.172327	chrX	15823218	15823339	122	-	203	702	323	230	0.8943	0.7697	0.6383	0.5476
Ranbp16	intronretention_Junction_92066	intronretentionright-Junction_92066	J001	0.0396305	6.74107	0.0094218	0.128272	11.9565	10.8086	-0.145613	chrX	15823291	15823372	82	-	24	210	183	190	0.3478	0.3955	0.532	0.6271
Ranbp16	intronretention_Junction_92066	intronretentionright-Junction_92066	J002	0.0396094	6.74385	0.00940713	0.128199	11.0179	12.1556	0.141775	chrX	15823325	15823435	111	-	45	321	161	113	0.6522	0.6045	0.468	0.3729	-0.294294
Ranbp16	intronretention_Junction_92067	intronretentionleft-Junction_92067	J001	0.283583	4.64958	0.0310612	0.252823	10.8601	8.44292	-0.363219	chrX	15823299	15823372	74	-	10	119	130	91	0.0385	0.228	0.405	0.4027
Ranbp16	intronretention_Junction_92067	intronretentionleft-Junction_92067	J002	0.281763	4.67712	0.0305669	0.250154	12.0003	14.4632	0.269324	chrX	15823235	15823347	113	-	250	403	191	135	0.9615	0.772	0.595	0.5973
Ranbp16	intronretention_Junction_92067	intronretentionright-Junction_92067	J001	0.0323642	9.28376	0.00231194	0.0527972	10.4138	9.13804	-0.188541	chrX	15823299	15823372	74	-	10	119	130	91	0.1818	0.2705	0.4467	0.4461
Ranbp16	intronretention_Junction_92067	intronretentionright-Junction_92067	J002	0.0319052	9.37	0.00220566	0.0512676	11.0357	12.1567	0.139579	chrX	15823325	15823435	111	-	45	321	161	113	0.8182	0.7295	0.5533	0.5539	-0.35263
CG34015	intronretention_Junction_93016	intronretentionleft-Junction_93016	J001	0.028888	10.8521	0.00098682	0.0293248	11.1254	9.86851	-0.172959	chrX	16341731	16341803	73	-	23	84	216	171	0.6216	0.5563	0.7826	0.8066
CG34015	intronretention_Junction_93016	intronretentionleft-Junction_93016	J002	0.0297685	10.6375	0.00110814	0.0316067	7.39847	9.00844	0.284052	chrX	16341658	16341779	122	-	14	67	60	41	0.3784	0.4437	0.2174	0.1934
CG34015	intronretention_Junction_93016	intronretentionright-Junction_93016	J001	0.0692236	6.29376	0.0121164	0.147611	11.2487	9.7362	-0.208333	chrX	16341731	16341803	73	-	23	84	216	171	0.3026	0.4693	0.6034	0.6813
CG34015	intronretention_Junction_93016	intronretentionright-Junction_93016	J002	0.0693785	6.2826	0.0121929	0.148323	9.6223	11.1423	0.21159	chrX	16341756	16341877	122	-	53	95	142	80	0.6974	0.5307	0.3966	0.3187	-0.144719
RhoGAPp190	intronretention_Junction_94398	intronretentionleft-Junction_94398	J001	0.140878	8.88125	0.00288115	0.0615789	11.0032	8.6464	-0.347751	chrX	17540618	17540682	65	-	10	71	184	172	0.2632	0.5726	0.7897	0.835
RhoGAPp190	intronretention_Junction_94398	intronretentionleft-Junction_94398	J002	0.142711	8.78853	0.00303131	0.0633831	6.989	9.40156	0.427814	chrX	17540547	17540666	120	-	28	53	49	34	0.7368	0.4274	0.2103	0.165
RhoGAPp190	intronretention_Junction_94398	intronretentionright-Junction_94398	J001	0.0584105	13.3488	0.000258594	0.0115355	10.8272	8.90089	-0.28264	chrX	17540618	17540682	65	-	10	71	184	172	0.2941	0.4702	0.7216	0.7679
RhoGAPp190	intronretention_Junction_94398	intronretentionright-Junction_94398	J002	0.0593052	13.2092	0.000278583	0.0122152	7.84944	9.89333	0.333865	chrX	17540635	17540754	120	-	24	80	71	52	0.7059	0.5298	0.2784	0.2321	-0.323838
CG15814	intronretention_Junction_94659	intronretentionleft-Junction_94659	J001	0.0866663	5.67474	0.0172109	0.181226	12.6106	11.1163	-0.181961	chrX	17742794	17742850	57	-	72	297	155	141	0.5902	0.7538	0.8757	0.8545
CG15814	intronretention_Junction_94659	intronretentionleft-Junction_94659	J002	0.0878637	5.61208	0.017837	0.184698	7.37521	9.01508	0.289656	chrX	17742731	17742842	112	-	50	97	22	24	0.4098	0.2462	0.1243	0.1455
CG15814	intronretention_Junction_94659	intronretentionright-Junction_94659	J001	0.0443811	4.585	0.032253	0.258786	12.3792	11.3541	-0.124696	chrX	17742794	17742850	57	-	72	297	155	141	0.5	0.4261	0.5805	0.6812
CG15814	intronretention_Junction_94659	intronretentionright-Junction_94659	J002	0.0444093	4.58247	0.0323006	0.259066	10.8504	11.8938	0.132455	chrX	17742803	17742922	120	-	72	400	112	66	0.5	0.5739	0.4195	0.3188	-0.126706
Sh	intronretention_Junction_94864	intronretentionleft-Junction_94864	J001	0.0240027	5.43231	0.0197675	0.196097	14.101	13.3028	-0.0840612	chrX	17844125	17844642	518	-	100	548	333	279	0.4405	0.5074	0.6213	0.6092
Sh	intronretention_Junction_94864	intronretentionleft-Junction_94864	J002	0.0240282	5.42771	0.0198197	0.196324	12.6917	13.5104	0.0901921	chrX	17844052	17844173	122	-	127	532	203	179	0.5595	0.4926	0.3787	0.3908
Sh	intronretention_Junction_94864	intronretentionright-Junction_94864	J001	0.017957	33.1661	8.4615e-09	2.94926e-06	14.6333	12.7924	-0.193962	chrX	17844125	17844642	518	-	100	548	333	279	0.2208	0.2183	0.4568	0.5064
Sh	intronretention_Junction_94864	intronretentionright-Junction_94864	J002	0.0178872	33.2766	7.9938e-09	2.85892e-06	14.881	16.58	0.155966	chrX	17844595	17844715	121	-	353	1962	396	272	0.7792	0.7817	0.5432	0.4936	-0.119341
Sh	intronretention_Junction_95006	intronretentionleft-Junction_95006	J001	0.0502524	27.615	1.48025e-07	2.8025e-05	5.32177	8.70151	0.709359	chrX	17933990	17934244	255	-	35	108	10	10	0.1006	0.0767	0.0084	0.0168
Sh	intronretention_Junction_95006	intronretentionleft-Junction_95006	J002	0.0482663	28.4029	9.85184e-08	2.07357e-05	17.8582	15.6093	-0.194178	chrX	17933922	17934038	117	-	313	1301	1174	584	0.8994	0.9233	0.9916	0.9832
Sh	intronretention_Junction_95006	intronretentionright-Junction_95006	J001	0.0354388	19.5734	9.68054e-06	0.000925932	5.645	8.29541	0.555341	chrX	17933990	17934244	255	-	35	108	10	10	0.1691	0.1549	0.0292	0.051
Sh	intronretention_Junction_95006	intronretentionright-Junction_95006	J002	0.0338463	20.1259	7.25074e-06	0.000725586	14.6014	13.0414	-0.163004	chrX	17934197	17934317	121	-	172	589	332	186	0.8309	0.8451	0.9708	0.949	0.137645
CG4045	intronretention_Junction_97519	intronretentionleft-Junction_97519	J001	0.0372715	15.346	8.95105e-05	0.00514892	8.03971	9.57628	0.252322	chrX	1969172	1969238	67	-	40	116	49	28	0.8511	0.8923	0.5904	0.6087
CG4045	intronretention_Junction_97519	intronretentionleft-Junction_97519	J002	0.0400155	14.7762	0.000121054	0.006466	7.02443	4.67261	-0.588152	chrX	1969125	1969220	96	-	7	14	34	18	0.1489	0.1077	0.4096	0.3913
CG4045	intronretention_Junction_97519	intronretentionright-Junction_97519	J001	0.0505814	14.2041	0.000164015	0.00816681	7.85264	9.78056	0.31674	chrX	1969172	1969238	67	-	40	116	49	28	0.7692	0.6374	0.3577	0.3294
CG4045	intronretention_Junction_97519	intronretentionright-Junction_97519	J002	0.0508535	14.1541	0.000168434	0.00834639	9.58535	7.62138	-0.330778	chrX	1969191	1969308	118	-	12	66	88	57	0.2308	0.3626	0.6423	0.6706	0.181724
DIP1	intronretention_Junction_98699	intronretentionleft-Junction_98699	J001	0.049259	3.93027	0.0474245	0.315859	13.4925	12.4605	-0.114797	chrX	21500819	21500999	181	-	91	142	408	376	0.4505	0.5201	0.5922	0.7002
DIP1	intronretention_Junction_98699	intronretentionleft-Junction_98699	J002	0.0493504	3.92389	0.0476046	0.316203	11.7429	12.7932	0.123587	chrX	21500746	21500867	122	-	111	131	281	161	0.5495	0.4799	0.4078	0.2998
DIP1	intronretention_Junction_98699	intronretentionright-Junction_98699	J001	0.0321721	13.4764	0.000241586	0.0110157	13.7203	12.1913	-0.170467	chrX	21500819	21500999	181	-	91	142	408	376	0.4174	0.4494	0.6405	0.7176
DIP1	intronretention_Junction_98699	intronretentionright-Junction_98699	J002	0.0322422	13.4517	0.000244783	0.0110866	11.5105	13.0807	0.184499	chrX	21500952	21501061	110	-	127	174	229	148	0.5826	0.5506	0.3595	0.2824	-0.131004

## Sheet: AS MXE events
Gene	AS_event_ID	AS_structure_ID	sub_junction_ID	sub-junction_dispersion_estimate	LRT_statistic-full_vs_reduced	LRT_p_value-full_vs_reduced	BH_adjusted_p-values	DN1	TH	fitting_parameter_log2fold_change_TH_DN1	sub_junction_chr	sub_junction_start_coor	sub_junction_end_coor	sub_junction_size	sub_junction_strand	raw_count.IndexA	raw_count.IndexB	raw_count.IndexC	raw_count.IndexD	percentage_usage.IndexA	percentage_usage.IndexB	percentage_usage.IndexC	percentage_usage.IndexD	deltaPSI
NaCP60E	5_Junction_25709_Junction_25710*3_Junction_25713_Junction_25714	3_Junction_25713_Junction_25714	J001	0.0699402	11.4845	0.000701796	0.023334	6.49047	8.68617	0.420397	chr2R	20803354	20804841	1488	+	33	53	25	23	0.541	0.3557	0.1462	0.1565	0.297
NaCP60E	5_Junction_25709_Junction_25710*3_Junction_25713_Junction_25714	3_Junction_25713_Junction_25714	J002	0.0684481	11.667	0.000636172	0.0217138	11.1707	9.25391	-0.271583	chr2R	20804413	20804841	429	+	28	96	146	124	0.459	0.6443	0.8538	0.8435	-0.297
NaCP60E	5_Junction_25709_Junction_25710*3_Junction_25713_Junction_25714	5_Junction_25709_Junction_25710	J001	0.190492	1.48018	0.223746	0.615999	5.70021	6.67549	0.227858	chr2R	20802985	20803252	268	+	12	21	33	10	0.3529	0.1469	0.1701	0.0671	0.1313
NaCP60E	5_Junction_25709_Junction_25710*3_Junction_25713_Junction_25714	5_Junction_25709_Junction_25710	J002	0.184195	1.51502	0.218375	0.610324	10.89	9.94395	-0.131106	chr2R	20802985	20804293	1309	+	22	122	161	139	0.6471	0.8531	0.8299	0.9329	-0.1313
Atpalpha	5_Junction_61944_Junction_61945_Junction_61946*3_Junction_61953_Junction_61955_Junction_61961	3_Junction_61953_Junction_61955_Junction_61961	J001	0.147008	3.87422	0.0490331	0.320588	13.2408	14.101	0.0908054	chr3R	16792924	16798893	5970	+	136	543	273	265	0.4373	0.1862	0.1182	0.1243	0.1905
Atpalpha	5_Junction_61944_Junction_61945_Junction_61946*3_Junction_61953_Junction_61955_Junction_61961	3_Junction_61953_Junction_61955_Junction_61961	J002	0.0299155	4.94769	0.0261255	0.228622	11.1489	11.4578	0.0394291	chr3R	16794208	16798893	4686	+	39	263	148	119	0.1254	0.0902	0.0641	0.0558	0.04785
Atpalpha	5_Junction_61944_Junction_61945_Junction_61946*3_Junction_61953_Junction_61955_Junction_61961	3_Junction_61953_Junction_61955_Junction_61961	J003	0.145173	4.18503	0.0407824	0.292695	19.0487	16.9702	-0.166687	chr3R	16796699	16798893	2195	+	136	2110	1889	1748	0.4373	0.7236	0.8177	0.8199	-0.23835
Atpalpha	5_Junction_61944_Junction_61945_Junction_61946*3_Junction_61953_Junction_61955_Junction_61961	5_Junction_61944_Junction_61945_Junction_61946	J001	0.123587	3.45591	0.0630259	0.359926	13.0837	13.6406	0.0601393	chr3R	16792335	16792828	494	+	114	371	296	286	0.3089	0.1309	0.0903	0.0897	0.1299
Atpalpha	5_Junction_61944_Junction_61945_Junction_61946*3_Junction_61953_Junction_61955_Junction_61961	5_Junction_61944_Junction_61945_Junction_61946	J002	0.0335488	7.7552	0.0053558	0.0909867	10.7789	11.357	0.075376	chr3R	16792335	16794112	1778	+	40	205	139	128	0.1084	0.0723	0.0424	0.0402	0.04905
Atpalpha	5_Junction_61944_Junction_61945_Junction_61946*3_Junction_61953_Junction_61955_Junction_61961	5_Junction_61944_Junction_61945_Junction_61946	J003	0.114842	4.35357	0.0369314	0.278133	19.9865	17.8272	-0.164943	chr3R	16792335	16796603	4269	+	215	2259	2844	2774	0.5827	0.7968	0.8673	0.8701	-0.17895

## Sheet: Notes
See https://github.com/qqwang-berkeley/JUM/wiki/0.c-Output-files for a detailed explanation of the JUM output
Differentially spliced AS events in DN1 neurons compared to non-circadian TH neurons, in five conventionally recognized AS categories: cassette exon, A5SS (alternative 5' splice site), A3SS (alternative 3' splice site), intron retention and MXE (mutually exclusively spliced exons)
1) Each tab represents the differentially spliced AS events in each AS pattern category
2) Each spreadsheet contains the following information for each AS junction:
Gene	The gene that the AS event is associated with.
AS event ID	The AS event ID
AS structure ID	The AS structures that the specific AS event covers.
sub_junction ID	the sub_AS_junctions that each AS structure includes from the specific AS event.
	The first four columns specify the ID of the AS event, the gene it is associated with, and the basic structure of the AS event in terms of JUM definition (refer to the JUM paper for details). In JUM, each AS event will contain several AS_structures and each AS_structure contains several sub_AS_junctions.
	Each cassette exon AS event, intron retention event with intron size larger than read length, and MXE AS event has two AS structures, and each AS structure has two sub-AS-junctions. As a result each AS event will have four lines in the final output specifying the differential splicing and structure of the AS event.
	Each intron retention event with intron size smaller than the read length has one AS structure that has two sub-AS-junctions. As a result each of these small intron retention AS event will have two lines in the final output specifying the differential splicing and structure of the AS events.
	Each A5SS and A3SS AS events has one AS structure and each AS structure has several sub-AS-junctions, depending on how many alternative 5' or 3' splice sites the AS event covers. As a result each A5SS and A3SS AS event will have multiple lines in the final output specifying the differential splicing and structure of the AS event.
sub-junction_dispersion_estimate	The estimated dispersion parameter when modeling the count data as negative binomial distributions. Each sub_AS_junction receives one dispersion parameter. This is for monitoring purpose and users can ignore this information.
LRT_statistic-full_vs_reduced	The statistic calculated to perform a statistic test for differential AS between two conditions, checking whether the corresponding sub_AS_junction is differentially spliced between the two conditions under comparison. This is calculated from comparing two generalized linear models. Monitoring purpose only. Users can skip this information.
LRT_p_value-full_vs_reduced	The pvalue of the statistical test for differential AS analysis. This is to test whether the corresponding sub_AS_junction is significantly differentially spliced between the two conditions under comparison.
BH_adjusted_p-values	Corrected pvalue for differential AS analysis between conditions
DN1
TH
fitting_parameter_log2fold_change_TH_DN1	Columns 9-11 all contain intermediate information calculated during the generalized linear model fitting for differential AS analysis. Users can skip this information.
sub_junction_chr
sub_junction_start_coor
sub_junction_end_coor
sub_junction_size
sub_junction_strand	Columns 12-16 specify the chromosome coordinates, strand, size, etc. information of the specific sub_AS_junction.
raw_count.IndexA
raw_count.IndexB
raw_count.IndexC
raw_count.IndexD	The raw read counts of reads that mapped to the sub_AS_junction in each of the neuron group sample replicates. IndexA and B are DN1 neurons and IndexC and D are Th neurons.
percentage_usage.IndexA
percentage_usage.IndexB
percentage_usage.IndexC
percentage_usage.IndexD	The percentage usage of that sub_AS_junction in the AS structure in each of the neuron group sample replicates. If the sub_AS_junction is significantly differentially spliced between two neuron groups, users can detect a significant difference in the percentage usage between the two neuron groups (indexA,B - DN1 v.s. Index C,D - TH).
delta Percent spliced In (deltaPSI)	This column describes the level of changes of that significantly differentially spliced AS event between two neuron groups.
	For a cassette exon event, each AS event contains two AS_structures that include four sub_AS_junctions in total. So each cassette exon AS event will have four lines in the cassette exon output file. One deltaPSI value will be calculated for each cassette exon AS event (aka, every four lines). deltaPSI here is calculated as the difference in the ratio of exon_inclusion_isoform between DN1 and TH s…
	deltaPSI = exon_inclusion_isoform \ (exon_inclusion_isoform + exon_exclusion_isoform) (under DN1) - exon_inclusion_isoform \ (exon_inclusion_isoform + exon_exclsion_isoform) (under TH).
	For an intron retention event, each AS event contains either two AS_structures with four sub_AS_junctions (when the intron size is longer than the RNA-seq read length) and so four lines in the intron_retention output file, or one AS_Structure and two sub_AS_junctions (when the intron size is smaller than the RNA-seq read length) and so two lines in the output file . One deltaPSI value is calculat…
	deltaPSI = intron_inclusion_isoform / (intron_inclusion_isoform+intron_exclusion_isoform) (under DN1) - intron_inclusion_isoform / (intron_inclusion_isoform+intron_exclusion_isoform) (under TH)
	For an A5SS or A3SS, each AS event contains one AS structure and several sub_AS_junctions, depending on how many alternative 5'/3' splice sites are there. One deltaPSI value is calculated for EACH sub_AS_junction (so, every line). Here deltaPSI is calculated as the change in the percentage of usage for each sub_AS_junctionbetween DN1 and TH samples:
	deltaPSI = sub_AS_junction_i / (sub_AS_junction_1+sub_AS_junction_2+ ... +sub_AS_junction_i+ ...+sub_AS_junction_n) (under DN1) - sub_AS_junction_i / (sub_AS_junction_1+sub_AS_junction_2+ ... + sub_AS_junction_i+...+sub_AS_junction_n) (under TH). It is calculated this way because A5SS and A3SS events usually have more than two alternative splicing isoforms (not like cassette exon and intron reten…
