# Supplementary material for: Striking circadian neuron diversity and cycling of Drosophila alternative splicing
Source: eLife journal article supplement (doi:10.7554/elife.35618), 2018-06-04
Supplement: supp [file elife-35618-supp-v1.zip › elife_poa_e35618_Figure_3_source_data_2.xlsx]

## Sheet: AS. Cassette exon events
Gene	AS_event_ID	AS_structure_ID	sub_junction_ID	sub-junction_dispersion_estimate	LRT_statistic-full_vs_reduced	LRT_p_value-full_vs_reduced	BH_adjusted_p-values	LNd	TH	fitting_parameter_log2fold_change_TH_LNd	sub_junction_chr	sub_junction_start_coor	sub_junction_end_coor	sub_junction_length	sub_junction_strand	raw_count.IndexA	raw_count.IndexB	raw_count.IndexC	raw_count.IndexD	percentage_usage.IndexA	percentage_usage.IndexB	percentage_usage.IndexC	percentage_usage.IndexD	deltaPSI
Hsf	3_Junction_18681_Junction_18682*5_Junction_18680_Junction_18681	3_Junction_18681_Junction_18682	J001	0.185365	3.85422	0.0496211	0.536915	2.20112	2.4502	0.154659	chr2R	14018550	14018785	236	-	133	331	188	243	0.9236	0.8133	0.5311	0.7666
Hsf	3_Junction_18681_Junction_18682*5_Junction_18680_Junction_18681	3_Junction_18681_Junction_18682	J002	0.186934	3.82535	0.0504828	0.54058	1.94938	1.68707	-0.208494	chr2R	14018694	14018785	92	-	11	76	166	74	0.0764	0.1867	0.4689	0.2334
Hsf	3_Junction_18681_Junction_18682*5_Junction_18680_Junction_18681	5_Junction_18680_Junction_18681	J001	0.229172	3.40156	0.0651348	0.585105	1.97352	1.65832	-0.251043	chr2R	14018550	14018639	90	-	13	61	211	59	0.089	0.1556	0.5288	0.1954
Hsf	3_Junction_18681_Junction_18682*5_Junction_18680_Junction_18681	5_Junction_18680_Junction_18681	J002	0.227541	3.42442	0.064239	0.584178	2.17441	2.4769	0.18791	chr2R	14018550	14018785	236	-	133	331	188	243	0.911	0.8444	0.4712	0.8046	-0.287689
Pten	3_Junction_368_Junction_370*5_Junction_367_Junction_368	3_Junction_368_Junction_370	J001	0.085772	1.92641	0.165152	0.801829	1.74155	1.86409	0.0980976	chr2L	10256506	10257393	888	-	62	118	40	54	0.7126	0.5086	0.4706	0.4286
Pten	3_Junction_368_Junction_370*5_Junction_367_Junction_368	3_Junction_368_Junction_370	J002	0.0858147	1.92569	0.16523	0.801842	1.835	1.71117	-0.100802	chr2L	10257122	10257393	272	-	25	114	45	72	0.2874	0.4914	0.5294	0.5714
Pten	3_Junction_368_Junction_370*5_Junction_367_Junction_368	5_Junction_367_Junction_368	J001	0.0402628	5.8151	0.0158892	0.308858	1.95877	1.79106	-0.129136	chr2L	10256506	10256908	403	-	47	97	91	75	0.4312	0.4512	0.6947	0.5814
Pten	3_Junction_368_Junction_370*5_Junction_367_Junction_368	5_Junction_367_Junction_368	J002	0.0403074	5.81043	0.0159314	0.308942	1.71531	1.89046	0.140267	chr2L	10256506	10257393	888	-	62	118	40	54	0.5688	0.5488	0.3053	0.4186	-0.16271
CG2082	3_Junction_57261_Junction_57263*5_Junction_57259_Junction_57261	3_Junction_57261_Junction_57263	J001	0.156209	3.16968	0.0750172	0.621506	1.73417	1.52871	-0.18193	chr3R	1586683	1587366	684	-	11	54	31	98	0.2037	0.1049	0.4697	0.2279
CG2082	3_Junction_57261_Junction_57263*5_Junction_57259_Junction_57261	3_Junction_57261_Junction_57263	J002	0.154958	3.19275	0.0739653	0.620624	2.1828	2.36902	0.118111	chr3R	1587168	1587366	199	-	43	461	35	332	0.7963	0.8951	0.5303	0.7721
CG2082	3_Junction_57261_Junction_57263*5_Junction_57259_Junction_57261	5_Junction_57259_Junction_57261	J001	0.13217	4.40702	0.0357914	0.453238	2.17848	2.37986	0.127554	chr3R	1586683	1587158	476	-	51	474	36	318	0.8226	0.8977	0.5373	0.7644
CG2082	3_Junction_57261_Junction_57263*5_Junction_57259_Junction_57261	5_Junction_57259_Junction_57261	J002	0.13333	4.37344	0.0365032	0.457422	1.74528	1.51917	-0.200177	chr3R	1586683	1587366	684	-	11	54	31	98	0.1774	0.1023	0.4627	0.2356	0.137788
wry	3_Junction_6046_Junction_6068*5_Junction_6044_Junction_6046	3_Junction_6046_Junction_6068	J001	0.183423	3.83126	0.050305	0.540152	1.93197	1.67594	-0.205099	chr2L	1836652	1842897	6246	+	47	11	185	44	0.2956	0.1122	0.5745	0.3548
wry	3_Junction_6046_Junction_6068*5_Junction_6044_Junction_6046	3_Junction_6046_Junction_6068	J002	0.182812	3.84263	0.0499652	0.538695	1.90863	2.15703	0.176509	chr2L	1837406	1842897	5492	+	112	87	137	80	0.7044	0.8878	0.4255	0.6452
wry	3_Junction_6046_Junction_6068*5_Junction_6044_Junction_6046	5_Junction_6044_Junction_6046	J001	0.398915	3.35491	0.067005	0.593666	1.42023	1.77495	0.321653	chr2L	1836652	1837189	538	+	46	51	23	38	0.4946	0.8226	0.1106	0.4634
wry	3_Junction_6046_Junction_6068*5_Junction_6044_Junction_6046	5_Junction_6044_Junction_6046	J002	0.399332	3.35161	0.0671391	0.593666	1.98327	1.63312	-0.280255	chr2L	1836652	1842897	6246	+	47	11	185	44	0.5054	0.1774	0.8894	0.5366	0.252372
Gdh	3_Junction_60899_Junction_60900*5_Junction_60898_Junction_60899	3_Junction_60899_Junction_60900	J001	0.0882341	3.90506	0.048141	0.5282	2.39664	2.25097	-0.0904661	chr3R	19762367	19763143	777	-	59	472	143	281	0.6277	0.8041	0.8773	0.8673
Gdh	3_Junction_60899_Junction_60900*5_Junction_60898_Junction_60899	3_Junction_60899_Junction_60900	J002	0.0893127	3.86832	0.0492059	0.53488	1.57852	1.75011	0.148879	chr3R	19762741	19763143	403	-	35	115	20	43	0.3723	0.1959	0.1227	0.1327
Gdh	3_Junction_60899_Junction_60900*5_Junction_60898_Junction_60899	5_Junction_60898_Junction_60899	J001	0.0865028	1.41547	0.234151	0.872569	1.91451	2.00905	0.0695397	chr3R	19762367	19762701	335	-	54	209	67	81	0.4779	0.3069	0.319	0.2238
Gdh	3_Junction_60899_Junction_60900*5_Junction_60898_Junction_60899	5_Junction_60898_Junction_60899	J002	0.0857499	1.42578	0.232454	0.872569	2.36799	2.27971	-0.0548125	chr3R	19762367	19763143	777	-	59	472	143	281	0.5221	0.6931	0.681	0.7762	0.161976

## Sheet: AS A5SS events
Gene	AS_event_ID	AS_structure_ID	sub_junction_ID	sub-junction_dispersion_estimate	LRT_statistic-full_vs_reduced	LRT_p_value-full_vs_reduced	BH_adjusted_p-values	LNd	TH	fitting_parameter_log2fold_change_TH_LNd	sub_junction_chr	sub_junction_start_coor	sub_junction_end_coor	sub_junction_length	sub_junction_strand	raw_count.IndexA	raw_count.IndexB	raw_count.IndexC	raw_count.IndexD	percentage_usage.IndexA	percentage_usage.IndexB	percentage_usage.IndexC	percentage_usage.IndexD	deltaPSI
Sam-S	3_Junction_1096_Junction_1111	3_Junction_1096_Junction_1111	J001	0.186672	3.82066	0.0506243	0.54083	1.44924	1.08646	-0.415667	chr2L	108101	108586	486	+	6	8	68	23	0.3529	0.0909	0.5354	0.3833	-0.23745
Sam-S	3_Junction_1096_Junction_1111	3_Junction_1096_Junction_1111	J002	0.184996	3.85324	0.0496501	0.536915	1.4715	1.79258	0.284748	chr2L	108226	108586	361	+	11	80	59	37	0.6471	0.9091	0.4646	0.6167	0.23745
Ih	3_Junction_15323_Junction_15344	3_Junction_15323_Junction_15344	J001	0.0911436	3.87997	0.0488655	0.532275	1.90054	1.71202	-0.150715	chr2R	10163911	10164784	874	+	30	105	78	59	0.283	0.4907	0.5909	0.6413	-0.22925
Ih	3_Junction_15323_Junction_15344	3_Junction_15323_Junction_15344	J002	0.0911	3.88145	0.0488223	0.532275	1.70653	1.89529	0.151357	chr2R	10164031	10164784	754	+	76	109	54	33	0.717	0.5093	0.4091	0.3587	0.22925
CG5065	3_Junction_17354_Junction_17360_Junction_17369_Junction_17375	3_Junction_17354_Junction_17360_Junction_17369_Junction_17375	J001	0.645374	0.859498	0.353879	0.933933	2.19612	1.89725	-0.211047	chr2R	12495839	12506307	10469	+	29	236	52	185	0.0147	0.2946	0.1525	0.3109	-0.07705
CG5065	3_Junction_17354_Junction_17360_Junction_17369_Junction_17375	3_Junction_17354_Junction_17360_Junction_17369_Junction_17375	J002	0.572653	1.20496	0.272332	0.892912	2.49517	2.25357	-0.146927	chr2R	12496830	12506307	9478	+	111	456	208	265	0.0563	0.5693	0.61	0.4454	-0.2149
CG5065	3_Junction_17354_Junction_17360_Junction_17369_Junction_17375	3_Junction_17354_Junction_17360_Junction_17369_Junction_17375	J003	0.035407	6.22748	0.0125783	0.268671	1.98762	1.96681	-0.0151831	chr2R	12500078	12506307	6230	+	156	60	41	105	0.0792	0.0749	0.1202	0.1765	-0.0713
CG5065	3_Junction_17354_Junction_17360_Junction_17369_Junction_17375	3_Junction_17354_Junction_17360_Junction_17369_Junction_17375	J004	0.903522	0.996843	0.318076	0.922273	1.73025	2.93786	0.763783	chr2R	12505648	12506307	660	+	1674	49	40	40	0.8497	0.0612	0.1173	0.0672	0.3632
Sik3	3_Junction_19133_Junction_19140	3_Junction_19133_Junction_19140	J001	0.122646	3.73028	0.0534345	0.548582	1.22987	0.928943	-0.404847	chr2R	14575873	14579544	3672	+	3	8	37	11	0.2143	0.2667	0.6491	0.3929	-0.2805
Sik3	3_Junction_19133_Junction_19140	3_Junction_19133_Junction_19140	J002	0.114375	3.90323	0.0481932	0.528224	1.12414	1.37641	0.292094	chr2R	14576246	14579544	3299	+	11	22	20	17	0.7857	0.7333	0.3509	0.6071	0.2805
CG11505	3_Junction_44764_Junction_44768	3_Junction_44764_Junction_44768	J001	0.199975	3.79245	0.0514842	0.541603	1.33802	1.05295	-0.345665	chr3L	3225288	3226875	1588	+	9	7	31	22	0.2571	0.2	0.7381	0.3729	-0.32695
CG11505	3_Junction_44764_Junction_44768	3_Junction_44764_Junction_44768	J002	0.190797	3.92977	0.0474385	0.525408	1.29665	1.54813	0.255745	chr3L	3226539	3226875	337	+	26	28	11	37	0.7429	0.8	0.2619	0.6271	0.32695
Tsp66E	3_Junction_49724_Junction_49725	3_Junction_49724_Junction_49725	J001	0.0812702	13.4059	0.000250832	0.0218804	1.76657	2.1104	0.256564	chr3L	8905845	8906067	223	+	146	87	32	84	0.8588	0.7768	0.3765	0.5419	0.3586
Tsp66E	3_Junction_49724_Junction_49725	3_Junction_49724_Junction_49725	J002	0.0814317	13.3846	0.000253693	0.0219486	1.79523	1.40401	-0.354618	chr3L	8905871	8906067	197	+	24	25	53	71	0.1412	0.2232	0.6235	0.4581	-0.3586
Sap47	3_Junction_53391_Junction_53393	3_Junction_53391_Junction_53393	J001	0.0805666	4.41187	0.0356897	0.453238	2.67762	2.47685	-0.112444	chr3R	11777563	11779878	2316	+	14	624	534	689	0.3182	0.2478	0.5711	0.3971	-0.2011
Sap47	3_Junction_53391_Junction_53393	3_Junction_53391_Junction_53393	J002	0.0807189	4.40379	0.0358591	0.453285	2.75029	2.94869	0.100489	chr3R	11777572	11779878	2307	+	30	1894	401	1046	0.6818	0.7522	0.4289	0.6029	0.2011
Sap47	3_Junction_53401_Junction_53402	3_Junction_53401_Junction_53402	J001	0.0368572	14.3229	0.000153982	0.0154789	3.031	3.23103	0.0922019	chr3R	11779956	11780303	348	+	180	3161	1145	1803	0.8571	0.7908	0.5875	0.6217	0.21935
Sap47	3_Junction_53401_Junction_53402	3_Junction_53401_Junction_53402	J002	0.0349278	14.9974	0.000107662	0.0132869	2.84073	2.64548	-0.102733	chr3R	11779977	11780303	327	+	30	836	804	1097	0.1429	0.2092	0.4125	0.3783	-0.21935
Dad	3_Junction_54166_Junction_54168	3_Junction_54166_Junction_54168	J001	0.0609882	7.12397	0.007606	0.195197	1.90868	1.78086	-0.0999956	chr3R	12880084	12880772	689	+	64	40	95	78	0.8649	0.7692	0.9596	0.9398	-0.13265
Dad	3_Junction_54166_Junction_54168	3_Junction_54166_Junction_54168	J002	0.110257	5.23298	0.0221625	0.370407	0.712907	1.0943	0.618217	chr3R	12880111	12880772	662	+	10	12	4	5	0.1351	0.2308	0.0404	0.0602	0.13265
CG12746	3_Junction_55099_Junction_55102	3_Junction_55099_Junction_55102	J001	0.0970558	17.092	3.56116e-05	0.00626467	1.6879	1.27874	-0.400509	chr3R	1390746	1391808	1063	+	11	30	24	70	0.3333	0.566	0.8889	0.9211	-0.45535
CG12746	3_Junction_55099_Junction_55102	3_Junction_55099_Junction_55102	J002	0.110506	15.7692	7.15588e-05	0.0099382	0.746399	1.35958	0.86514	chr3R	1391175	1391808	634	+	22	23	3	6	0.6667	0.434	0.1111	0.0789	0.45535
CG42613	3_Junction_56476_Junction_56483	3_Junction_56476_Junction_56483	J001	0.340834	3.89338	0.0484767	0.529681	2.09082	1.71784	-0.283476	chr3R	14798881	14800711	1831	+	19	123	32	190	0.5	0.8849	0.9143	0.9694	-0.2494
CG42613	3_Junction_56476_Junction_56483	3_Junction_56476_Junction_56483	J002	0.375068	3.57421	0.0586832	0.563605	0.775396	1.24075	0.67821	chr3R	14800023	14800711	689	+	19	16	3	6	0.5	0.1151	0.0857	0.0306	0.2494
msi	3_Junction_62676_Junction_62678_Junction_62683_Junction_62686	3_Junction_62676_Junction_62678_Junction_62683_Junction_62686	J001	0.240678	0.000736525	0.978349	0.993408	1.54939	1.63867	0.0808234	chr3R	21341962	21344981	3020	+	51	16	62	13	0.1518	0.0394	0.1245	0.051	0.00785
msi	3_Junction_62676_Junction_62678_Junction_62683_Junction_62686	3_Junction_62676_Junction_62678_Junction_62683_Junction_62686	J002	0.108552	0.53412	0.46488	0.968122	2.17515	2.29437	0.0769861	chr3R	21342071	21344981	2911	+	132	259	216	108	0.3929	0.6379	0.4337	0.4235	0.0868
msi	3_Junction_62676_Junction_62678_Junction_62683_Junction_62686	3_Junction_62676_Junction_62678_Junction_62683_Junction_62686	J003	0.117866	4.68335	0.0304563	0.418032	1.77942	1.42735	-0.318069	chr3R	21344159	21344981	823	+	13	41	73	56	0.0387	0.101	0.1466	0.2196	-0.11325
msi	3_Junction_62676_Junction_62678_Junction_62683_Junction_62686	3_Junction_62676_Junction_62678_Junction_62683_Junction_62686	J004	0.0958359	0.0125551	0.910784	0.990142	2.01804	2.13457	0.0809895	chr3R	21344194	21344981	788	+	140	90	147	78	0.4167	0.2217	0.2952	0.3059	0.01865
unc80	3_Junction_64155_Junction_64156	3_Junction_64155_Junction_64156	J001	0.0593804	11.9684	0.000541099	0.0373288	1.31237	0.808271	-0.699259	chr3R	23491916	23492147	232	+	3	4	33	32	0.15	0.0354	0.2705	0.2909	-0.188
unc80	3_Junction_64155_Junction_64156	3_Junction_64155_Junction_64156	J002	0.051608	13.0204	0.000308123	0.0242704	1.70908	1.94267	0.184822	chr3R	23491967	23492147	181	+	17	109	89	78	0.85	0.9646	0.7295	0.7091	0.188
NONE	3_Junction_77265_Junction_77744	3_Junction_77265_Junction_77744	J001	0.0970045	4.71421	0.0299144	0.41274	2.76292	3.01214	0.124591	chrM	13060	13187	128	+	176	2701	32	1080	0.5131	0.7115	0.3333	0.4079	0.2417
NONE	3_Junction_77265_Junction_77744	3_Junction_77265_Junction_77744	J002	0.0963521	4.74404	0.0294	0.410385	2.92931	2.68113	-0.127719	chrM	9806	13187	3382	+	167	1095	64	1568	0.4869	0.2885	0.6667	0.5921	-0.2417
Act5C	3_Junction_98619_Junction_98621	3_Junction_98619_Junction_98621	J001	0.038521	7.94518	0.00482156	0.152828	1.96696	2.14741	0.126629	chrX	5795046	5796721	1676	+	94	229	58	119	0.5081	0.4429	0.2387	0.3107	0.2008
Act5C	3_Junction_98619_Junction_98621	3_Junction_98619_Junction_98621	J002	0.0382228	7.99497	0.00469076	0.150785	2.36847	2.2024	-0.104877	chrX	5796129	5796721	593	+	91	288	185	264	0.4919	0.5571	0.7613	0.6893	-0.2008
CG31635	5_Junction_12175_Junction_12179	5_Junction_12175_Junction_12179	J001	0.307507	3.35183	0.0671302	0.593666	0.630477	1.05825	0.747167	chr2L	6646947	6647745	799	-	11	12	1	5	0.3056	0.3636	0.02	0.1923	0.22845
CG31635	5_Junction_12175_Junction_12179	5_Junction_12175_Junction_12179	J002	0.19892	4.51693	0.0335611	0.441327	1.59327	1.35565	-0.233004	chr2L	6646947	6647919	973	-	25	21	49	21	0.6944	0.6364	0.98	0.8077	-0.22845
Aldh-III	5_Junction_25463_Junction_25464	5_Junction_25463_Junction_25464	J001	0.343862	9.13841	0.00250299	0.100072	2.88003	2.19941	-0.388968	chr2R	3355331	3355925	595	-	264	626	169	431	0.6111	0.9125	0.9769	0.9931	-0.2232
Aldh-III	5_Junction_25463_Junction_25464	5_Junction_25463_Junction_25464	J002	0.347497	9.05271	0.00262306	0.102923	0.993312	1.73037	0.80076	chr2R	3355331	3356613	1283	-	168	60	4	3	0.3889	0.0875	0.0231	0.0069	0.2232
CG17684	5_Junction_34053_Junction_34057_Junction_34062_Junction_34066_Junction_34069	5_Junction_34053_Junction_34057_Junction_34062_Junction_34066_Junction_34069	J001	0.02408	0.325132	0.56854	0.978477	1.56607	1.63151	0.0590643	chr2RHet	916757	917160	404	-	38	48	44	29	0.1792	0.2087	0.1739	0.1657	0.02415
CG17684	5_Junction_34053_Junction_34057_Junction_34062_Junction_34066_Junction_34069	5_Junction_34053_Junction_34057_Junction_34062_Junction_34066_Junction_34069	J002	0.0596021	6.05174	0.0138926	0.286406	1.28226	0.849764	-0.593552	chr2RHet	916757	918928	2172	-	4	9	21	16	0.0189	0.0391	0.083	0.0914	-0.0582
CG17684	5_Junction_34053_Junction_34057_Junction_34062_Junction_34066_Junction_34069	5_Junction_34053_Junction_34057_Junction_34062_Junction_34066_Junction_34069	J003	0.0914355	3.87388	0.0490429	0.533658	1.60989	1.92357	0.256825	chr2RHet	916757	934343	17587	-	75	90	33	48	0.3538	0.3913	0.1304	0.2743	0.1702
CG17684	5_Junction_34053_Junction_34057_Junction_34062_Junction_34066_Junction_34069	5_Junction_34053_Junction_34057_Junction_34062_Junction_34066_Junction_34069	J004	0.125076	0.597709	0.439453	0.962483	1.39004	1.64443	0.242463	chr2RHet	916757	941125	24369	-	53	23	25	23	0.25	0.1	0.0988	0.1314	0.0599
CG17684	5_Junction_34053_Junction_34057_Junction_34062_Junction_34066_Junction_34069	5_Junction_34053_Junction_34057_Junction_34062_Junction_34066_Junction_34069	J005	0.0790314	4.53926	0.033126	0.438701	1.97208	1.70563	-0.209414	chr2RHet	916757	948010	31254	-	42	60	130	59	0.1981	0.2609	0.5138	0.3371	-0.19595
NONE	5_Junction_34860_Junction_34861	5_Junction_34860_Junction_34861	J001	0.0704059	33.8696	5.8931e-09	4.78475e-06	1.00528	1.67248	0.734385	chr3L	11247752	11247776	25	-	15	26	25	19	0.5	0.7222	0.0799	0.0984	0.52195
NONE	5_Junction_34860_Junction_34861	5_Junction_34860_Junction_34861	J002	0.0667381	35.0822	3.16073e-09	2.78012e-06	1.98592	1.49209	-0.412469	chr3L	11247752	11247780	29	-	15	10	288	174	0.5	0.2778	0.9201	0.9016	-0.52195
Rbp6	5_Junction_38996_Junction_38998	5_Junction_38996_Junction_38998	J001	0.0361931	11.1641	0.000833944	0.0514753	2.196	2.43063	0.146455	chr3L	17122071	17140205	18135	-	51	476	85	321	0.7183	0.792	0.5743	0.5071	0.21445
Rbp6	5_Junction_38996_Junction_38998	5_Junction_38996_Junction_38998	J002	0.0365474	11.0687	0.000877987	0.0529551	2.16168	1.90043	-0.185834	chr3L	17122071	17158011	35941	-	20	125	63	312	0.2817	0.208	0.4257	0.4929	-0.21445
drpr	5_Junction_39006_Junction_39007	5_Junction_39006_Junction_39007	J001	0.0534837	19.1995	1.17744e-05	0.00295901	0.745243	1.34358	0.850303	chr3L	1716556	1716673	118	-	13	50	5	2	0.4483	0.4098	0.1	0.0435	0.3573
drpr	5_Junction_39006_Junction_39007	5_Junction_39006_Junction_39007	J002	0.0462045	20.492	5.98796e-06	0.00166323	1.77082	1.47654	-0.262197	chr3L	1716556	1716795	240	-	16	72	45	44	0.5517	0.5902	0.9	0.9565	-0.3573
Pdp1	5_Junction_48680_Junction_48681	5_Junction_48680_Junction_48681	J001	0.259274	4.16987	0.0411489	0.48581	2.08927	1.7042	-0.293905	chr3L	7811323	7823485	12163	-	16	46	356	89	0.1882	0.2233	0.7574	0.3436	-0.34475
Pdp1	5_Junction_48680_Junction_48681	5_Junction_48680_Junction_48681	J002	0.259208	4.17088	0.0411243	0.48581	1.89567	2.27594	0.263757	chr3L	7811323	7846281	34959	-	69	160	114	170	0.8118	0.7767	0.2426	0.6564	0.34475
PRL-1	5_Junction_4868_Junction_4870	5_Junction_4868_Junction_4870	J001	0.078603	4.31653	0.0377439	0.465405	1.53819	1.26108	-0.286573	chr2L	16250158	16251239	1082	-	9	7	123	25	0.1233	0.0603	0.252	0.1623	-0.11535
PRL-1	5_Junction_4868_Junction_4870	5_Junction_4868_Junction_4870	J002	0.0780077	4.34124	0.0371997	0.461933	2.05268	2.25566	0.136043	chr2L	16250158	16257074	6917	-	64	109	365	129	0.8767	0.9397	0.748	0.8377	0.11535
Rim	5_Junction_54751_Junction_54752	5_Junction_54751_Junction_54752	J001	0.134814	6.56904	0.0103768	0.241782	1.71466	1.96668	0.197836	chr3R	13701267	13702052	786	-	18	246	23	70	0.4186	0.2805	0.0652	0.1632	0.23535
Rim	5_Junction_54751_Junction_54752	5_Junction_54751_Junction_54752	J002	0.133126	6.63787	0.00998334	0.235736	2.57725	2.34432	-0.136658	chr3R	13701267	13702787	1521	-	25	631	330	359	0.5814	0.7195	0.9348	0.8368	-0.23535
CG1552	5_Junction_79099_Junction_79100	5_Junction_79099_Junction_79100	J001	0.0812052	4.38167	0.0363273	0.456125	2.55112	2.3338	-0.128448	chrX	10946890	10947065	176	-	106	262	159	772	0.4862	0.6469	0.713	0.8042	-0.19205
CG1552	5_Junction_79099_Junction_79100	5_Junction_79099_Junction_79100	J002	0.0819551	4.34421	0.037135	0.461673	1.98698	2.21637	0.157618	chrX	10946890	10947104	215	-	112	143	64	188	0.5138	0.3531	0.287	0.1958	0.19205

## Sheet: AS A3SS events
Gene	AS_event_ID	AS_structure_ID	sub_junction_ID	sub-junction_dispersion_estimate	LRT_statistic-full_vs_reduced	LRT_p_value-full_vs_reduced	BH_adjusted_p-values	LNd	TH	fitting_parameter_log2fold_change_TH_LNd	sub_junction_chr	sub_junction_start_coor	sub_junction_end_coor	sub_junction_length	sub_junction_strand	raw_count.IndexA	raw_count.IndexB	raw_count.IndexC	raw_count.IndexD	percentage_usage.IndexA	percentage_usage.IndexB	percentage_usage.IndexC	percentage_usage.IndexD	deltaPSI
ZAP3	3_Junction_103930_Junction_103931	3_Junction_103930_Junction_103931	J001	0.105743	9.69733	0.00184536	0.085489	1.2793	1.57442	0.299466	chrX	9969103	9969175	73	-	24	38	24	21	0.7742	0.95	0.4615	0.5526	0.35505
ZAP3	3_Junction_103930_Junction_103931	3_Junction_103930_Junction_103931	J002	0.134799	8.33127	0.00389684	0.137562	1.2794	0.831774	-0.6212	chrX	9969106	9969175	70	-	7	2	28	17	0.2258	0.05	0.5385	0.4474	-0.35505
CG17684	3_Junction_33107_Junction_34081_Junction_34087	3_Junction_33107_Junction_34081_Junction_34087	J001	0.0536712	5.11012	0.0237867	0.379258	1.83221	2.04412	0.1579	chr2RHet	1004872	1004929	58	-	100	35	166	27	0.6623	0.5645	0.4586	0.3418	0.2132
CG17684	3_Junction_33107_Junction_34081_Junction_34087	3_Junction_33107_Junction_34081_Junction_34087	J002	0.279547	0.0288523	0.865121	0.984406	1.30233	1.49884	0.202753	chr2RHet	947223	1004929	57707	-	25	14	27	28	0.1656	0.2258	0.0746	0.3544	-0.0188
CG17684	3_Junction_33107_Junction_34081_Junction_34087	3_Junction_33107_Junction_34081_Junction_34087	J003	0.0688754	5.58665	0.0180979	0.336902	1.83224	1.48199	-0.306076	chr2RHet	989108	1004929	15822	-	26	13	169	24	0.1722	0.2097	0.4669	0.3038	-0.1944
uex	3_Junction_33627_Junction_33629	3_Junction_33627_Junction_33629	J001	0.218894	4.23202	0.0396682	0.478511	0.822032	1.23717	0.589777	chr2RHet	3179299	3179585	287	-	12	15	5	9	0.2	0.2308	0.0228	0.1139	0.14705
uex	3_Junction_33627_Junction_33629	3_Junction_33627_Junction_33629	J002	0.178986	4.97081	0.0257786	0.39838	2.06256	1.7941	-0.20118	chr2RHet	3179493	3179585	93	-	48	50	214	70	0.8	0.7692	0.9772	0.8861	-0.14705
app	3_Junction_35444_Junction_35447	3_Junction_35444_Junction_35447	J001	0.108478	5.96104	0.0146254	0.29573	1.07324	0.669084	-0.68171	chr3L	12214382	12257719	43338	-	3	3	12	16	0.2	0.15	0.4615	0.5926	-0.35205
app	3_Junction_35444_Junction_35447	3_Junction_35444_Junction_35447	J002	0.0724726	7.13844	0.00754489	0.195187	1.02849	1.27191	0.306465	chr3L	12233774	12257719	23946	-	12	17	14	11	0.8	0.85	0.5385	0.4074	0.35205
fru	3_Junction_55556_Junction_55581_Junction_55594_Junction_55595_Junction_55611_Junction_55625_Junction_55636_Junction_55646_Junction_55650	3_Junction_55556_Junction_55581_Junction_55594_Junction_55595_Junction_55611_Junction_55625_Junction_55636_Junction_55646_Junction_55650	J001	0.040308	21.4386	3.6534e-06	0.00116853	1.55171	0.927796	-0.74198	chr3R	14339335	14432274	92940	-	4	4	123	15	0.0197	0.0172	0.1367	0.1056	-0.1027
fru	3_Junction_55556_Junction_55581_Junction_55594_Junction_55595_Junction_55611_Junction_55625_Junction_55636_Junction_55646_Junction_55650	3_Junction_55556_Junction_55581_Junction_55594_Junction_55595_Junction_55611_Junction_55625_Junction_55636_Junction_55646_Junction_55650	J002	0.147159	18.5672	1.64015e-05	0.00353669	1.76883	0.691392	-1.35522	chr3R	14374797	14432274	57478	-	3	1	215	15	0.0148	0.0043	0.2389	0.1056	-0.1627
fru	3_Junction_55556_Junction_55581_Junction_55594_Junction_55595_Junction_55611_Junction_55625_Junction_55636_Junction_55646_Junction_55650	3_Junction_55556_Junction_55581_Junction_55594_Junction_55595_Junction_55611_Junction_55625_Junction_55636_Junction_55646_Junction_55650	J003	0.257347	9.69604	0.00184666	0.085489	0.930395	2.17551	1.22544	chr3R	14395828	14432274	36447	-	68	83	15	15	0.335	0.3578	0.0167	0.1056	0.28525
fru	3_Junction_55556_Junction_55581_Junction_55594_Junction_55595_Junction_55611_Junction_55625_Junction_55636_Junction_55646_Junction_55650	3_Junction_55556_Junction_55581_Junction_55594_Junction_55595_Junction_55611_Junction_55625_Junction_55636_Junction_55646_Junction_55650	J004	0.0811541	0.752109	0.385809	0.945708	1.45253	1.81591	0.322124	chr3R	14397458	14432274	34817	-	39	22	97	12	0.1921	0.0948	0.1078	0.0845	0.0473
fru	3_Junction_55556_Junction_55581_Junction_55594_Junction_55595_Junction_55611_Junction_55625_Junction_55636_Junction_55646_Junction_55650	3_Junction_55556_Junction_55581_Junction_55594_Junction_55595_Junction_55611_Junction_55625_Junction_55636_Junction_55646_Junction_55650	J005	0.674727	1.63198	0.20143	0.843071	0.439803	1.37583	1.64537	chr3R	14404338	14432274	27937	-	12	10	1	6	0.0591	0.0431	0.0011	0.0423	0.0294
fru	3_Junction_55556_Junction_55581_Junction_55594_Junction_55595_Junction_55611_Junction_55625_Junction_55636_Junction_55646_Junction_55650	3_Junction_55556_Junction_55581_Junction_55594_Junction_55595_Junction_55611_Junction_55625_Junction_55636_Junction_55646_Junction_55650	J006	0.103893	2.05108	0.152099	0.789646	1.74791	1.5613	-0.162883	chr3R	14411993	14432274	20282	-	16	21	205	14	0.0788	0.0905	0.2278	0.0986	-0.07855
fru	3_Junction_55556_Junction_55581_Junction_55594_Junction_55595_Junction_55611_Junction_55625_Junction_55636_Junction_55646_Junction_55650	3_Junction_55556_Junction_55581_Junction_55594_Junction_55595_Junction_55611_Junction_55625_Junction_55636_Junction_55646_Junction_55650	J007	0.063939	2.59203	0.107403	0.709968	1.20544	1.72673	0.518481	chr3R	14420893	14432274	11382	-	31	20	49	11	0.1527	0.0862	0.0544	0.0775	0.0535
fru	3_Junction_55556_Junction_55581_Junction_55594_Junction_55595_Junction_55611_Junction_55625_Junction_55636_Junction_55646_Junction_55650	3_Junction_55556_Junction_55581_Junction_55594_Junction_55595_Junction_55611_Junction_55625_Junction_55636_Junction_55646_Junction_55650	J008	0.0748122	4.41693	0.035584	0.453063	1.6524	1.39329	-0.246071	chr3R	14426577	14432274	5698	-	11	14	162	13	0.0542	0.0603	0.18	0.0915	-0.0785
fru	3_Junction_55556_Junction_55581_Junction_55594_Junction_55595_Junction_55611_Junction_55625_Junction_55636_Junction_55646_Junction_55650	3_Junction_55556_Junction_55581_Junction_55594_Junction_55595_Junction_55611_Junction_55625_Junction_55636_Junction_55646_Junction_55650	J009	0.439454	0.145063	0.703298	0.979352	1.29101	1.82433	0.498862	chr3R	14432238	14432274	37	-	19	57	33	41	0.0936	0.2457	0.0367	0.2887	0.00695
mmd	3_Junction_86255_Junction_86260	3_Junction_86255_Junction_86260	J001	0.0278753	4.03621	0.0445337	0.507069	1.64814	1.78462	0.114775	chrX	15843909	15845181	1273	-	25	78	54	60	0.5	0.4239	0.3214	0.3	0.15125
mmd	3_Junction_86255_Junction_86260	3_Junction_86255_Junction_86260	J002	0.0277424	4.04728	0.0442426	0.505114	1.99064	1.87608	-0.0855083	chrX	15844418	15845181	764	-	25	106	114	140	0.5	0.5761	0.6786	0.7	-0.15125
PDZ-GEF	5_Junction_11961_Junction_11962	5_Junction_11961_Junction_11962	J001	0.0878275	8.02348	0.00461748	0.149501	2.11363	1.87575	-0.172259	chr2L	6330886	6331042	157	+	78	110	100	111	0.7429	0.8594	0.9346	0.9652	-0.14875
PDZ-GEF	5_Junction_11961_Junction_11962	5_Junction_11961_Junction_11962	J002	0.0964533	7.54923	0.00600356	0.17415	0.887788	1.30263	0.553135	chr2L	6330886	6331045	160	+	27	18	7	4	0.2571	0.1406	0.0654	0.0348	0.14875
CG13384	5_Junction_13749_Junction_13751	5_Junction_13749_Junction_13751	J001	0.0735307	7.20064	0.00728776	0.193998	1.34702	0.993609	-0.439023	chr2L	8384895	8384995	101	+	5	9	33	25	0.2381	0.1011	0.44	0.3521	-0.22645
CG13384	5_Junction_13749_Junction_13751	5_Junction_13749_Junction_13751	J002	0.0663019	7.73565	0.0054141	0.164212	1.52128	1.74932	0.201516	chr2L	8384895	8386215	1321	+	16	80	42	46	0.7619	0.8989	0.56	0.6479	0.22645
Phb2	5_Junction_19268_Junction_19269_Junction_19270	5_Junction_19268_Junction_19269_Junction_19270	J001	0.0696784	1.51584	0.21825	0.854903	2.18447	2.09177	-0.0625572	chr2R	14708788	14708993	206	+	28	273	146	171	0.3889	0.5858	0.6266	0.6196	-0.13575
Phb2	5_Junction_19268_Junction_19269_Junction_19270	5_Junction_19268_Junction_19269_Junction_19270	J002	0.0261943	0.26856	0.604299	0.978477	1.82695	1.75399	-0.0587924	chr2R	14708788	14708996	209	+	20	105	60	78	0.2778	0.2253	0.2575	0.2826	-0.0185
Phb2	5_Junction_19268_Junction_19269_Junction_19270	5_Junction_19268_Junction_19269_Junction_19270	J003	0.0698019	5.53707	0.0186178	0.342403	1.42948	1.7094	0.258002	chr2R	14708788	14709479	692	+	24	88	27	27	0.3333	0.1888	0.1159	0.0978	0.1542
CG8920	5_Junction_20226_Junction_20228	5_Junction_20226_Junction_20228	J001	0.0289958	6.79266	0.00915335	0.223312	1.83163	1.97417	0.108116	chr2R	16211916	16212001	86	+	87	144	31	84	0.8447	0.8421	0.7045	0.6774	0.15245
CG8920	5_Junction_20226_Junction_20228	5_Junction_20226_Junction_20228	J002	0.0297726	6.69668	0.00965926	0.230664	1.50268	1.25965	-0.25451	chr2R	16211916	16212351	436	+	16	27	13	40	0.1553	0.1579	0.2955	0.3226	-0.15245
dpr	5_Junction_20585_Junction_20586	5_Junction_20585_Junction_20586	J001	0.0665694	8.5354	0.00348306	0.12721	1.31516	1.659	0.335077	chr2R	16621444	16631681	10238	+	53	11	34	14	0.6625	0.44	0.2595	0.2642	0.2894
dpr	5_Junction_20585_Junction_20586	5_Junction_20585_Junction_20586	J002	0.0668805	8.5055	0.00354074	0.128428	1.75371	1.43214	-0.292236	chr2R	16621444	16637187	15744	+	27	14	97	39	0.3375	0.56	0.7405	0.7358	-0.2894
koi	5_Junction_24742_Junction_24743	5_Junction_24742_Junction_24743	J001	0.0507811	13.4839	0.000240615	0.0211641	2.05325	2.30201	0.164987	chr2R	2701258	2701540	283	+	104	121	325	77	0.9811	0.9453	0.8045	0.8462	0.13785
koi	5_Junction_24742_Junction_24743	5_Junction_24742_Junction_24743	J002	0.0531531	13.1546	0.000286817	0.0234679	1.43004	0.921593	-0.633854	chr2R	2701258	2702563	1306	+	2	7	79	14	0.0189	0.0547	0.1955	0.1538	-0.13785
NONE	5_Junction_37282_Junction_37283	5_Junction_37282_Junction_37283	J001	0.0830476	5.84315	0.0156378	0.306228	1.56136	1.79961	0.204883	chr3L	15028615	15031242	2628	+	44	87	43	30	0.8148	0.8529	0.5059	0.7143	0.22375
NONE	5_Junction_37282_Junction_37283	5_Junction_37282_Junction_37283	J002	0.0874928	5.61322	0.0178254	0.333004	1.43478	1.11813	-0.359749	chr3L	15028615	15032717	4103	+	10	15	42	12	0.1852	0.1471	0.4941	0.2857	-0.22375
TMS1	5_Junction_38360_Junction_38361	5_Junction_38360_Junction_38361	J001	0.0172174	41.4068	1.2363e-10	2.17485e-07	3.19451	2.93449	-0.122484	chr3L	16407593	16407892	300	+	206	1701	1883	1714	0.8273	0.8302	0.9491	0.9538	-0.1227
TMS1	5_Junction_38360_Junction_38361	5_Junction_38360_Junction_38361	J002	0.0167413	42.3018	7.82186e-11	1.65119e-07	1.90853	2.26536	0.247277	chr3L	16407593	16407901	309	+	43	348	101	83	0.1727	0.1698	0.0509	0.0462	0.1227
Nc73EF	5_Junction_38852_Junction_38853	5_Junction_38852_Junction_38853	J001	0.0250516	5.25177	0.0219244	0.369078	2.1861	2.04309	-0.0976006	chr3L	16958078	16959166	1089	+	28	177	94	297	0.4746	0.3969	0.5697	0.5801	-0.13915
Nc73EF	5_Junction_38852_Junction_38853	5_Junction_38852_Junction_38853	J002	0.0250747	5.2477	0.0219758	0.369354	2.05135	2.19385	0.0968918	chr3L	16958078	16960480	2403	+	31	269	71	215	0.5254	0.6031	0.4303	0.4199	0.13915
PP2A-B'	5_Junction_55214_Junction_55215	5_Junction_55214_Junction_55215	J001	0.054386	10.0729	0.0015047	0.0750995	1.60933	1.32963	-0.27543	chr3R	13998671	13998846	176	+	20	25	35	40	0.3774	0.5208	0.7447	0.8	-0.32325
PP2A-B'	5_Junction_55214_Junction_55215	5_Junction_55214_Junction_55215	J002	0.0564005	9.87036	0.00167963	0.0809821	1.10173	1.44672	0.393011	chr3R	13998671	14001053	2383	+	33	23	12	10	0.6226	0.4792	0.2553	0.2	0.32325
cry	5_Junction_56657_Junction_56658	5_Junction_56657_Junction_56658	J001	0.278909	10.2555	0.00136281	0.0712444	1.91845	1.15981	-0.726046	chr3R	15038204	15038279	76	+	5	1	616	69	0.0515	0.0417	0.6898	0.2828	-0.4397
cry	5_Junction_56657_Junction_56658	5_Junction_56657_Junction_56658	J002	0.279135	10.2487	0.00136783	0.0712444	1.74018	2.46261	0.500953	chr3R	15038204	15039204	1001	+	92	23	277	175	0.9485	0.9583	0.3102	0.7172	0.4397
CG11755	5_Junction_68959_Junction_68960	5_Junction_68959_Junction_68960	J001	0.172438	6.41997	0.0112844	0.253959	1.46442	1.06895	-0.454127	chr3R	4502769	4502833	65	+	11	14	40	10	0.3143	0.4	0.8889	0.5882	-0.3814
CG11755	5_Junction_68959_Junction_68960	5_Junction_68959_Junction_68960	J002	0.178778	6.24387	0.0124624	0.267358	0.889074	1.33073	0.581838	chr3R	4502769	4503993	1225	+	24	21	5	7	0.6857	0.6	0.1111	0.4118	0.3814
pan	5_Junction_74670_Junction_74671	5_Junction_74670_Junction_74671	J001	0.0448155	5.97312	0.0145256	0.294841	2.42854	2.26757	-0.0989386	chr4	115241	115461	221	+	57	270	407	318	0.75	0.7105	0.8306	0.8883	-0.1292
pan	5_Junction_74670_Junction_74671	5_Junction_74670_Junction_74671	J002	0.0456968	5.88084	0.0153065	0.302548	1.66606	1.86927	0.166039	chr4	115241	118446	3206	+	19	110	83	40	0.25	0.2895	0.1694	0.1117	0.1292
NONE	5_Junction_75073_Junction_75074	5_Junction_75073_Junction_75074	J001	0.172431	4.73986	0.0294715	0.410385	1.68013	1.37118	-0.293155	chr4	1288365	1288426	62	+	19	61	23	38	0.1827	0.3961	0.5	0.7308	-0.326
NONE	5_Junction_75073_Junction_75074	5_Junction_75073_Junction_75074	J002	0.173083	4.72493	0.0297285	0.41125	1.46912	1.77151	0.270027	chr4	1288365	1288440	76	+	85	93	23	14	0.8173	0.6039	0.5	0.2692	0.326
NONE	5_Junction_75149_Junction_75150	5_Junction_75149_Junction_75150	J001	0.029392	7.55809	0.00597413	0.17415	1.94847	1.77325	-0.135946	chr4	1307642	1307714	73	+	56	67	101	71	0.4516	0.5276	0.6966	0.6827	-0.20005
NONE	5_Junction_75149_Junction_75150	5_Junction_75149_Junction_75150	J002	0.0294428	7.54977	0.00600176	0.17415	1.6054	1.8045	0.168663	chr4	1307642	1320218	12577	+	68	60	44	33	0.5484	0.4724	0.3034	0.3173	0.20005
AstA-R1	5_Junction_95819_Junction_95820	5_Junction_95819_Junction_95820	J001	0.257256	4.11878	0.0424097	0.493722	1.598	1.07118	-0.577067	chrX	3521774	3533249	11476	+	6	7	118	14	0.0545	0.1795	0.5364	0.2188	-0.2606
AstA-R1	5_Junction_95819_Junction_95820	5_Junction_95819_Junction_95820	J002	0.257801	4.11071	0.0426125	0.494258	1.65752	2.14073	0.369072	chrX	3521774	3537524	15751	+	104	32	102	50	0.9455	0.8205	0.4636	0.7812	0.2606

## Sheet: AS intron retention events
Gene	AS_event_ID	AS_structure_ID	sub_junction_ID	sub-junction_dispersion_estimate	LRT_statistic-full_vs_reduced	LRT_p_value-full_vs_reduced	BH_adjusted_p-values	LNd	TH	fitting_parameter_log2fold_change_TH_LNd	sub_junction_chr	sub_junction_start_coor	sub_junction_end_coor	sub_junction_length	sub_junction_strand	raw_count.IndexA	raw_count.IndexB	raw_count.IndexC	raw_count.IndexD	percentage_usage.IndexA	percentage_usage.IndexB	percentage_usage.IndexC	percentage_usage.IndexD	deltaPSI
frj	intronretention_Junction_12036	intronretentionleft-Junction_12036	J001	0.0522015	13.5908	0.000227301	0.0205203	2.17727	1.89731	-0.198563	chr2L	6457916	6458085	170	+	30	120	243	121	0.3261	0.4301	0.7431	0.6541
frj	intronretention_Junction_12036	intronretentionleft-Junction_12036	J002	0.0524414	13.5406	0.000233457	0.0208825	1.79047	2.08199	0.217624	chr2L	6457869	6457964	96	+	62	159	84	64	0.6739	0.5699	0.2569	0.3459
frj	intronretention_Junction_12036	intronretentionright-Junction_12036	J001	0.115532	7.34338	0.00673102	0.185602	2.18204	1.88747	-0.209223	chr2L	6457916	6458085	170	+	30	120	243	121	0.3261	0.5505	0.81	0.7076
frj	intronretention_Junction_12036	intronretentionright-Junction_12036	J002	0.116145	7.30927	0.00685998	0.187307	1.6569	1.96595	0.246742	chr2L	6458038	6458126	89	+	62	98	57	50	0.6739	0.4495	0.19	0.2924	-0.275087
frj	intronretention_Junction_12038	intronretentionleft-Junction_12038	J001	0.045294	4.66937	0.0307051	0.420102	1.41999	1.18631	-0.259398	chr2L	6458095	6458151	57	+	12	16	38	17	0.1791	0.129	0.3304	0.2537
frj	intronretention_Junction_12038	intronretentionleft-Junction_12038	J002	0.0430145	4.82497	0.0280504	0.405678	1.77393	1.9166	0.111604	chr2L	6458050	6458143	94	+	55	108	77	50	0.8209	0.871	0.6696	0.7463
frj	intronretention_Junction_12038	intronretentionright-Junction_12038	J001	0.0462086	5.06578	0.0244027	0.384399	1.42777	1.17897	-0.276232	chr2L	6458095	6458151	57	+	12	16	38	17	0.0938	0.1391	0.2159	0.2833
frj	intronretention_Junction_12038	intronretentionright-Junction_12038	J002	0.0435916	5.22899	0.0222134	0.370407	1.93379	2.07471	0.101478	chr2L	6458104	6458200	97	+	116	99	138	43	0.9062	0.8609	0.7841	0.7167	-0.184563
gprs	intronretention_Junction_17423	intronretentionleft-Junction_17423	J001	0.0610433	10.0081	0.00155851	0.0772306	1.12392	1.46513	0.382498	chr2R	12529197	12529555	359	+	24	44	11	11	0.5	0.3411	0.1358	0.1507
gprs	intronretention_Junction_17423	intronretentionleft-Junction_17423	J002	0.0595902	10.1519	0.00144155	0.073505	1.87397	1.63511	-0.196713	chr2R	12529152	12529245	94	+	24	85	70	62	0.5	0.6589	0.8642	0.8493
gprs	intronretention_Junction_17423	intronretentionright-Junction_17423	J001	0.115122	4.79557	0.028533	0.405883	1.15166	1.43669	0.319036	chr2R	12529197	12529555	359	+	24	44	11	11	0.2449	0.419	0.088	0.1803
gprs	intronretention_Junction_17423	intronretentionright-Junction_17423	J002	0.113108	4.86487	0.0274089	0.402692	1.99686	1.77491	-0.169985	chr2R	12529508	12529604	97	+	74	61	114	50	0.7551	0.581	0.912	0.8197	0.337151
CG6805	intronretention_Junction_17801	intronretentionleft-Junction_17801	J001	0.0719352	5.79436	0.0160777	0.310567	1.19297	0.839887	-0.506296	chr2R	12894563	12894636	74	+	4	9	13	16	0.0741	0.0604	0.2364	0.1667
CG6805	intronretention_Junction_17801	intronretentionleft-Junction_17801	J002	0.0466453	7.22455	0.00719134	0.193141	1.79504	1.92563	0.101312	chr2R	12894516	12894611	96	+	50	140	42	80	0.9259	0.9396	0.7636	0.8333
CG6805	intronretention_Junction_17801	intronretentionright-Junction_17801	J001	0.167463	4.32417	0.0375748	0.463862	1.20589	0.826281	-0.545393	chr2R	12894563	12894636	74	+	4	9	13	16	0.0227	0.0647	0.2131	0.1053
CG6805	intronretention_Junction_17801	intronretentionright-Junction_17801	J002	0.127405	5.21734	0.0223628	0.371186	1.98465	2.19076	0.142546	chr2R	12894589	12894684	96	+	172	130	48	136	0.9773	0.9353	0.7869	0.8947	-0.208106
CG9945	intronretention_Junction_20471	intronretentionleft-Junction_20471	J001	0.135605	4.21352	0.0401031	0.480871	0.886314	1.22261	0.464069	chr2R	16508255	16508320	66	+	13	25	3	9	0.2131	0.0883	0.0517	0.0338
CG9945	intronretention_Junction_20471	intronretentionleft-Junction_20471	J002	0.115387	4.70413	0.0300902	0.414624	2.24305	2.04997	-0.12986	chr2R	16508207	16508303	97	+	48	258	55	257	0.7869	0.9117	0.9483	0.9662
CG9945	intronretention_Junction_20471	intronretentionright-Junction_20471	J001	0.048724	4.12276	0.0423101	0.493462	0.906396	1.20119	0.406255	chr2R	16508255	16508320	66	+	13	25	3	9	0.1008	0.105	0.05	0.0396
CG9945	intronretention_Junction_20471	intronretentionright-Junction_20471	J002	0.0363596	4.76765	0.0289994	0.408324	2.21143	2.11621	-0.0634995	chr2R	16508273	16508369	97	+	116	213	57	218	0.8992	0.895	0.95	0.9604	0.174937
yellow-c	intronretention_Junction_4427	intronretentionleft-Junction_4427	J001	0.417521	7.3031	0.00688357	0.187307	1.30228	2.10837	0.695086	chr2L	15036991	15037049	59	+	643	28	8	3	0.954	0.6222	0.2581	0.2143
yellow-c	intronretention_Junction_4427	intronretentionleft-Junction_4427	J002	0.424058	7.20076	0.00728726	0.193998	1.77746	0.935791	-0.925559	chr2L	15036943	15037039	97	+	31	17	23	11	0.046	0.3778	0.7419	0.7857
yellow-c	intronretention_Junction_4427	intronretentionright-Junction_4427	J001	0.582804	6.42905	0.0112268	0.253959	1.2423	2.1715	0.805674	chr2L	15036991	15037049	59	+	643	28	8	3	0.9442	0.4308	0.1569	0.0769
yellow-c	intronretention_Junction_4427	intronretentionright-Junction_4427	J002	0.585695	6.39915	0.0114175	0.255863	2.07639	1.14042	-0.864507	chr2L	15037002	15037098	97	+	38	37	43	36	0.0558	0.5692	0.8431	0.9231	0.490194
Rh50	intronretention_Junction_46136	intronretentionleft-Junction_46136	J001	0.278016	5.6712	0.0172457	0.326046	2.42818	2.15586	-0.171607	chr3L	4918861	4919099	239	+	42	154	221	698	0.2577	0.4438	0.8984	0.6112
Rh50	intronretention_Junction_46136	intronretentionleft-Junction_46136	J002	0.278538	5.66114	0.0173448	0.326919	2.13732	2.41028	0.173401	chr3L	4918813	4918909	97	+	121	193	25	444	0.7423	0.5562	0.1016	0.3888
Rh50	intronretention_Junction_46136	intronretentionright-Junction_46136	J001	0.47099	8.16818	0.00426315	0.14308	2.59175	1.99245	-0.379379	chr3L	4918861	4919099	239	+	42	154	221	698	0.0901	0.4529	0.9444	0.7522
Rh50	intronretention_Junction_46136	intronretentionright-Junction_46136	J002	0.471071	8.16682	0.00426636	0.14308	2.01686	2.61608	0.375297	chr3L	4919052	4919148	97	+	424	186	13	230	0.9099	0.5471	0.0556	0.2478	-0.340318
Tsp66E	intronretention_Junction_49725	intronretentionleft-Junction_49725	J001	0.0344972	18.3269	1.8606e-05	0.00381073	1.76247	1.42747	-0.30413	chr3L	8905871	8906067	197	+	24	25	53	71	0.2449	0.1712	0.5146	0.5182
Tsp66E	intronretention_Junction_49725	intronretentionleft-Junction_49725	J002	0.0345467	18.3098	1.87738e-05	0.00381073	1.73402	2.00408	0.208813	chr3L	8905823	8905919	97	+	74	121	50	66	0.7551	0.8288	0.4854	0.4818
Tsp66E	intronretention_Junction_49725	intronretentionright-Junction_49725	J001	0.0616394	14.6364	0.00013037	0.0138996	1.76834	1.42767	-0.30873	chr3L	8905871	8906067	197	+	24	25	53	71	0.3243	0.4032	0.8154	0.6893
Tsp66E	intronretention_Junction_49725	intronretentionright-Junction_49725	J002	0.0614111	14.6723	0.000127915	0.0138996	1.33154	1.69211	0.345727	chr3L	8906020	8906114	95	+	50	37	12	32	0.6757	0.5968	0.1846	0.3107	-0.33817
Pnn	intronretention_Junction_70230	intronretentionleft-Junction_70230	J001	0.104936	4.88606	0.0270744	0.402586	1.8875	1.61682	-0.223319	chr3R	5567690	5567920	231	+	27	44	135	49	0.2935	0.1888	0.5794	0.3769
Pnn	intronretention_Junction_70230	intronretentionleft-Junction_70230	J002	0.10447	4.90614	0.0267614	0.402586	1.87545	2.12956	0.183321	chr3R	5567642	5567738	97	+	65	189	98	81	0.7065	0.8112	0.4206	0.6231
Pnn	intronretention_Junction_70230	intronretentionright-Junction_70230	J001	0.0932514	4.61448	0.0317031	0.427911	1.87417	1.6298	-0.201558	chr3R	5567690	5567920	231	+	27	44	135	49	0.3699	0.3034	0.6818	0.4712
Pnn	intronretention_Junction_70230	intronretentionright-Junction_70230	J002	0.0932386	4.61504	0.0316927	0.427911	1.68421	1.92448	0.192396	chr3R	5567873	5567966	94	+	46	101	63	55	0.6301	0.6966	0.3182	0.5288	-0.254855
NONE	intronretention_Junction_75034	intronretentionleft-Junction_75034	J001	0.10696	4.15918	0.0414094	0.487808	1.71392	1.42572	-0.265613	chr4	1287111	1287167	57	+	18	24	118	11	0.4	0.4898	0.7973	0.55
NONE	intronretention_Junction_75034	intronretentionleft-Junction_75034	J002	0.108625	4.10211	0.0428297	0.496165	1.2131	1.53495	0.3395	chr4	1287071	1287159	89	+	27	25	30	9	0.6	0.5102	0.2027	0.45
NONE	intronretention_Junction_75034	intronretentionright-Junction_75034	J001	0.344808	5.3047	0.021268	0.365255	1.86608	1.28252	-0.541032	chr4	1287111	1287167	57	+	18	24	118	11	0.2169	0.3077	0.9077	0.4783
NONE	intronretention_Junction_75034	intronretentionright-Junction_75034	J002	0.344695	5.3064	0.0212472	0.365255	1.1603	1.75218	0.594659	chr4	1287120	1287199	80	+	65	54	12	12	0.7831	0.6923	0.0923	0.5217	-0.183966
RpS3A	intronretention_Junction_76859	intronretentionleft-Junction_76859	J001	0.0370043	14.673	0.000127865	0.0138996	1.99385	1.75199	-0.186567	chr4	86675	86729	55	-	69	34	126	72	0.4894	0.382	0.7368	0.7423
RpS3A	intronretention_Junction_76859	intronretentionleft-Junction_76859	J002	0.0370928	14.65	0.000129438	0.0138996	1.55025	1.82575	0.235984	chr4	86627	86723	97	-	72	55	45	25	0.5106	0.618	0.2632	0.2577
RpS3A	intronretention_Junction_76859	intronretentionright-Junction_76859	J001	0.0725442	6.23553	0.0125212	0.268075	1.97531	1.7816	-0.148904	chr4	86675	86729	55	-	69	34	126	72	0.633	0.4595	0.8182	0.75
RpS3A	intronretention_Junction_76859	intronretentionright-Junction_76859	J002	0.0722535	6.25455	0.0123875	0.267358	1.40724	1.63601	0.217319	chr4	86682	86778	97	-	40	40	28	24	0.367	0.5405	0.1818	0.25	-0.245284
roX2	intronretention_Junction_79611	intronretentionleft-Junction_79611	J001	0.148576	11.7549	0.000606827	0.0402834	1.32142	0.780021	-0.760504	chrX	11473412	11473543	132	+	3	7	24	20	0.0667	0.0745	0.5854	0.3077
roX2	intronretention_Junction_79611	intronretentionleft-Junction_79611	J002	0.127324	13.0861	0.000297494	0.0241542	1.464	1.81891	0.313162	chrX	11473383	11473460	78	+	42	87	17	45	0.9333	0.9255	0.4146	0.6923
roX2	intronretention_Junction_79611	intronretentionright-Junction_79611	J001	0.172281	6.2952	0.0121066	0.265396	1.25812	0.8361	-0.589519	chrX	11473412	11473543	132	+	3	7	24	20	0.0566	0.0273	0.2857	0.1143
roX2	intronretention_Junction_79611	intronretentionright-Junction_79611	J002	0.150937	6.99632	0.00816776	0.204776	1.92726	2.19815	0.189741	chrX	11473496	11473561	66	+	50	249	60	155	0.9434	0.9727	0.7143	0.8857	-0.472718
Sh	intronretention_Junction_88742	intronretentionleft-Junction_88742	J001	0.0359289	5.24441	0.0220174	0.369466	2.52512	2.40395	-0.0709435	chrX	17844125	17844642	518	-	100	548	270	370	0.5618	0.635	0.7781	0.7171
Sh	intronretention_Junction_88742	intronretentionleft-Junction_88742	J002	0.0363209	5.19902	0.0225997	0.371186	2.06958	2.20347	0.0904409	chrX	17844077	17844173	97	-	78	315	77	146	0.4382	0.365	0.2219	0.2829
Sh	intronretention_Junction_88742	intronretentionright-Junction_88742	J001	0.0127397	16.4121	5.09594e-05	0.00827502	2.54913	2.38843	-0.0939458	chrX	17844125	17844642	518	-	100	548	270	370	0.295	0.2926	0.4712	0.454
Sh	intronretention_Junction_88742	intronretentionright-Junction_88742	J002	0.0125519	16.6097	4.59156e-05	0.00781675	2.61665	2.76215	0.0780668	chrX	17844595	17844691	97	-	239	1325	303	445	0.705	0.7074	0.5288	0.546	-0.107119
Pfrx	intronretention_Junction_90704	intronretentionleft-Junction_90704	J001	0.118799	4.22744	0.0397754	0.479257	0.756617	1.09951	0.539229	chrX	19400270	19400514	245	+	16	22	1	5	0.4706	0.2785	0.0833	0.1389
Pfrx	intronretention_Junction_90704	intronretentionleft-Junction_90704	J002	0.0911737	4.77266	0.0289152	0.408324	1.53097	1.3397	-0.192542	chrX	19400223	19400318	96	+	18	57	11	31	0.5294	0.7215	0.9167	0.8611
Pfrx	intronretention_Junction_90704	intronretentionright-Junction_90704	J001	0.0739928	4.735	0.0295549	0.410955	0.757565	1.09617	0.533029	chrX	19400270	19400514	245	+	16	22	1	5	0.0994	0.1429	0.0204	0.0472
Pfrx	intronretention_Junction_90704	intronretentionright-Junction_90704	J002	0.0524362	5.47958	0.0192399	0.348849	2.07275	1.95956	-0.0810134	chrX	19400467	19400563	97	+	145	132	48	101	0.9006	0.8571	0.9796	0.9528	0.338947
w	intronretention_Junction_93428	intronretentionleft-Junction_93428	J001	0.0775321	9.3974	0.00217293	0.093402	1.8917	1.59067	-0.250052	chrX	2686813	2686886	74	-	32	17	163	63	0.4776	0.68	0.8274	0.8873
w	intronretention_Junction_93428	intronretentionleft-Junction_93428	J002	0.0786144	9.30491	0.00228541	0.0964898	1.18458	1.56048	0.397616	chrX	2686767	2686861	95	-	35	8	34	8	0.5224	0.32	0.1726	0.1127
w	intronretention_Junction_93428	intronretentionright-Junction_93428	J001	0.0632025	9.39408	0.00217687	0.093402	1.85136	1.62664	-0.186687	chrX	2686813	2686886	74	-	32	17	163	63	0.6667	0.6538	0.9261	0.8514
w	intronretention_Junction_93428	intronretentionright-Junction_93428	J002	0.0765293	8.37797	0.00379796	0.134975	0.925842	1.33263	0.525438	chrX	2686839	2686934	96	-	16	9	13	11	0.3333	0.3462	0.0739	0.1486	-0.194933
NONE	intronretention-Junction_34861	intronretentionshort-Junction_34861	J001	0.0563303	38.6673	5.02564e-10	7.57794e-07	2.00605	1.46942	-0.449108	chr3L	11247752	11247780	29	-	15	10	288	174	0.3125	0.5263	0.9114	0.9255
NONE	intronretention-Junction_34861	intronretentionshort-Junction_34861	J002	0.0582248	37.8664	7.57591e-10	7.99637e-07	1.00547	1.72701	0.780398	chr3L	11247741	11247792	52	-	33	9	28	14	0.6875	0.4737	0.0886	0.0745	-0.499054

## Sheet: AS MXE events
Gene	AS_event_ID	AS_structure_ID	sub_junction_ID	sub-junction_dispersion_estimate	LRT_statistic-full_vs_reduced	LRT_p_value-full_vs_reduced	BH_adjusted_p-values	LNd	TH	fitting_parameter_log2fold_change_TH_LNd	sub_junction_chr	sub_junction_start_coor	sub_junction_end_coor	sub_junction_length	sub_junction_strand	raw_count.IndexA	raw_count.IndexB	raw_count.IndexC	raw_count.IndexD	percentage_usage.IndexA	percentage_usage.IndexB	percentage_usage.IndexC	percentage_usage.IndexD	deltaPSI
Eb1	5_Junction_24664_Junction_24665*3_Junction_24668_Junction_24670	3_Junction_24668_Junction_24670	J001	0.0953286	1.30006	0.254203	0.885515	2.15106	2.03185	-0.0822566	chr2R	2641008	2642205	1198	+	22	191	119	239	0.5366	0.5701	0.5805	0.771	-0.1224
Eb1	5_Junction_24664_Junction_24665*3_Junction_24668_Junction_24670	3_Junction_24668_Junction_24670	J002	0.0958954	1.29356	0.255392	0.885858	1.79727	1.92311	0.0976389	chr2R	2641943	2642205	263	+	19	144	86	71	0.4634	0.4299	0.4195	0.229	0.1224
Eb1	5_Junction_24664_Junction_24665*3_Junction_24668_Junction_24670	5_Junction_24664_Junction_24665	J001	0.157919	4.89381	0.0269531	0.402586	2.28751	2.05278	-0.156201	chr2R	2640493	2640730	238	+	41	213	204	214	0.4767	0.7053	0.9027	0.7868	-0.25375
Eb1	5_Junction_24664_Junction_24665*3_Junction_24668_Junction_24670	5_Junction_24664_Junction_24665	J002	0.159043	4.86347	0.0274312	0.402692	1.57853	1.8305	0.213659	chr2R	2640493	2641683	1191	+	45	89	22	58	0.5233	0.2947	0.0973	0.2132	0.25375
Ca-alpha1T	5_Junction_98866_Junction_98867*3_Junction_98876_Junction_98880	3_Junction_98876_Junction_98880	J001	0.111457	5.15099	0.0232331	0.37439	1.13982	1.44521	0.342471	chrX	6012316	6017420	5105	-	15	38	15	14	0.5769	0.4318	0.1442	0.3111	0.2767
Ca-alpha1T	5_Junction_98866_Junction_98867*3_Junction_98876_Junction_98880	3_Junction_98876_Junction_98880	J002	0.106994	5.3052	0.0212619	0.365255	1.73234	1.48089	-0.226259	chrX	6014382	6017420	3039	-	11	50	89	31	0.4231	0.5682	0.8558	0.6889	-0.2767
Ca-alpha1T	5_Junction_98866_Junction_98867*3_Junction_98876_Junction_98880	5_Junction_98866_Junction_98867	J001	0.05777	0.826576	0.363265	0.942773	1.40773	1.31899	-0.0939451	chrX	6009605	6012149	2545	-	15	35	15	28	0.5357	0.3846	0.6	0.5091	-0.0944
Ca-alpha1T	5_Junction_98866_Junction_98867*3_Junction_98876_Junction_98880	5_Junction_98866_Junction_98867	J002	0.0569742	0.83439	0.361006	0.942008	1.34517	1.43119	0.0894266	chrX	6009605	6014266	4662	-	13	56	10	27	0.4643	0.6154	0.4	0.4909	0.0944

## Sheet: Notes
See https://github.com/qqwang-berkeley/JUM/wiki/0.c-Output-files for a detailed explanation of the JUM output
Differentially spliced AS events in LNd neurons compared to non-circadian TH neurons, in five conventionally recognized AS categories: cassette exon, A5SS (alternative 5' splice site), A3SS (alternative 3' splice site), intron retention and MXE (mutually exclusively spliced exons)
1) Each tab represents the differentially spliced AS events in each AS pattern category
2) Each spreadsheet contains the following information for each AS junction:
Gene	The gene that the AS event is associated with.
AS event ID	The AS event ID
AS structure ID	The AS structures that the specific AS event covers.
sub_junction ID	the sub_AS_junctions that each AS structure includes from the specific AS event.
	The first four columns specify the ID of the AS event, the gene it is associated with, and the basic structure of the AS event in terms of JUM definition (refer to the JUM paper for details). In JUM, each AS event will contain several AS_structures and each AS_structure contains several sub_AS_junctions.
	Each cassette exon AS event, intron retention event with intron size larger than read length, and MXE AS event has two AS structures, and each AS structure has two sub-AS-junctions. As a result each AS event will have four lines in the final output specifying the differential splicing and structure of the AS event.
	Each intron retention event with intron size smaller than the read length has one AS structure that has two sub-AS-junctions. As a result each of these small intron retention AS event will have two lines in the final output specifying the differential splicing and structure of the AS events.
	Each A5SS and A3SS AS events has one AS structure and each AS structure has several sub-AS-junctions, depending on how many alternative 5' or 3' splice sites the AS event covers. As a result each A5SS and A3SS AS event will have multiple lines in the final output specifying the differential splicing and structure of the AS event.
sub-junction_dispersion_estimate	The estimated dispersion parameter when modeling the count data as negative binomial distributions. Each sub_AS_junction receives one dispersion parameter. This is for monitoring purpose and users can ignore this information.
LRT_statistic-full_vs_reduced	The statistic calculated to perform a statistic test for differential AS between two conditions, checking whether the corresponding sub_AS_junction is differentially spliced between the two conditions under comparison. This is calculated from comparing two generalized linear models. Monitoring purpose only. Users can skip this information.
LRT_p_value-full_vs_reduced	The pvalue of the statistical test for differential AS analysis. This is to test whether the corresponding sub_AS_junction is significantly differentially spliced between the two conditions under comparison.
BH_adjusted_p-values	Corrected pvalue for differential AS analysis between conditions
LNd
TH
fitting_parameter_log2fold_change_TH_LNd	Columns 9-11 all contain intermediate information calculated during the generalized linear model fitting for differential AS analysis. Users can skip this information.
sub_junction_chr
sub_junction_start_coor
sub_junction_end_coor
sub_junction_size
sub_junction_strand	Columns 12-16 specify the chromosome coordinates, strand, size, etc. information of the specific sub_AS_junction.
raw_count.IndexA
raw_count.IndexB
raw_count.IndexC
raw_count.IndexD	The raw read counts of reads that mapped to the sub_AS_junction in each of the neuron group sample replicates. IndexA and B are LNd neurons and IndexC and D are Th neurons.
percentage_usage.IndexA
percentage_usage.IndexB
percentage_usage.IndexC
percentage_usage.IndexD	The percentage usage of that sub_AS_junction in the AS structure in each of the neuron group sample replicates. If the sub_AS_junction is significantly differentially spliced between two neuron groups, users can detect a significant difference in the percentage usage between the two neuron groups (indexA,B - LNd v.s. Index C,D - TH).
delta Percent spliced In (deltaPSI)	This column describes the level of changes of that significantly differentially spliced AS event between two neuron groups.
	For a cassette exon event, each AS event contains two AS_structures that include four sub_AS_junctions in total. So each cassette exon AS event will have four lines in the cassette exon output file. One deltaPSI value will be calculated for each cassette exon AS event (aka, every four lines). deltaPSI here is calculated as the difference in the ratio of exon_inclusion_isoform between LNd and TH s…
	deltaPSI = exon_inclusion_isoform \ (exon_inclusion_isoform + exon_exclusion_isoform) (under LNd) - exon_inclusion_isoform \ (exon_inclusion_isoform + exon_exclsion_isoform) (under TH).
	For an intron retention event, each AS event contains either two AS_structures with four sub_AS_junctions (when the intron size is longer than the RNA-seq read length) and so four lines in the intron_retention output file, or one AS_Structure and two sub_AS_junctions (when the intron size is smaller than the RNA-seq read length) and so two lines in the output file . One deltaPSI value is calculat…
	deltaPSI = intron_inclusion_isoform / (intron_inclusion_isoform+intron_exclusion_isoform) (under LNd) - intron_inclusion_isoform / (intron_inclusion_isoform+intron_exclusion_isoform) (under TH)
	For an A5SS or A3SS, each AS event contains one AS structure and several sub_AS_junctions, depending on how many alternative 5'/3' splice sites are there. One deltaPSI value is calculated for EACH sub_AS_junction (so, every line). Here deltaPSI is calculated as the change in the percentage of usage for each sub_AS_junctionbetween LNd and TH samples:
	deltaPSI = sub_AS_junction_i / (sub_AS_junction_1+sub_AS_junction_2+ ... +sub_AS_junction_i+ ...+sub_AS_junction_n) (under LNd) - sub_AS_junction_i / (sub_AS_junction_1+sub_AS_junction_2+ ... + sub_AS_junction_i+...+sub_AS_junction_n) (under TH). It is calculated this way because A5SS and A3SS events usually have more than two alternative splicing isoforms (not like cassette exon and intron reten…
