# Supplementary material for: Striking circadian neuron diversity and cycling of Drosophila alternative splicing
Source: eLife journal article supplement (doi:10.7554/elife.35618), 2018-06-04
Supplement: supp [file elife-35618-supp-v1.zip › elife_poa_e35618_Figure_3_source_data_3.xlsx]

## Sheet: AS Cassette exon events
Gene	AS_event_ID	AS_structure_ID	sub_junction_ID	sub-junction_dispersion_estimate	LRT_statistic-full_vs_reduced	LRT_p_value-full_vs_reduced	BH_adjusted_p-values	LNv	TH	fitting_parameter_log2fold_change_TH_LNv	sub_junction_chr	sub_junction_start_coor	sub_junction_end_coor	sub_junction_length	sub_junction_strand	raw_count.IndexA	raw_count.IndexB	raw_count.IndexC	raw_count.IndexD	percentage_usage.IndexA	percentage_usage.IndexB	percentage_usage.IndexC	percentage_usage.IndexD	deltaPSI
pog	3_Junction_11359_Junction_11362*5_Junction_11357_Junction_11359	3_Junction_11359_Junction_11362	J001	0.0871003	9.02406	0.00266448	0.0436943	5.78188	4.52259	-0.35439	chr2L	4874169	4874885	717	+	16	217	249	110	0.4103	0.5293	0.8384	0.7285
pog	3_Junction_11359_Junction_11362*5_Junction_11357_Junction_11359	3_Junction_11359_Junction_11362	J002	0.0943851	8.45389	0.00364264	0.053923	3.22583	4.42723	0.456731	chr2L	4874562	4874885	324	+	23	193	48	41	0.5897	0.4707	0.1616	0.2715
pog	3_Junction_11359_Junction_11362*5_Junction_11357_Junction_11359	5_Junction_11357_Junction_11359	J001	0.103142	5.46156	0.0194393	0.164513	3.21939	4.24092	0.397587	chr2L	4874169	4874540	372	+	18	169	48	45	0.5294	0.4378	0.1616	0.2903
pog	3_Junction_11359_Junction_11362*5_Junction_11357_Junction_11359	5_Junction_11357_Junction_11359	J002	0.0942652	5.87855	0.0153264	0.142089	5.68353	4.60581	-0.303334	chr2L	4874169	4874885	717	+	16	217	249	110	0.4706	0.5622	0.8384	0.7097	0.313739
stai	3_Junction_12397_Junction_12399*5_Junction_12396_Junction_12397	3_Junction_12397_Junction_12399	J001	0.072678	5.17997	0.0228487	0.182005	6.82789	7.92763	0.21545	chr2L	6122410	6122976	567	+	64	615	409	552	0.8421	0.9304	0.7688	0.7863
stai	3_Junction_12397_Junction_12399*5_Junction_12396_Junction_12397	3_Junction_12397_Junction_12399	J002	0.0875123	4.31635	0.0377477	0.244272	4.23589	3.2058	-0.40198	chr2L	6122853	6122976	124	+	12	46	123	150	0.1579	0.0696	0.2312	0.2137
stai	3_Junction_12397_Junction_12399*5_Junction_12396_Junction_12397	5_Junction_12396_Junction_12397	J001	0.191565	3.71243	0.0540087	0.298659	8.80661	6.90512	-0.35092	chr2L	6122410	6122696	287	+	92	239	839	1770	0.5897	0.2799	0.6723	0.7623
stai	3_Junction_12397_Junction_12399*5_Junction_12396_Junction_12397	5_Junction_12396_Junction_12397	J002	0.194448	3.65708	0.0558315	0.303994	6.43885	8.33203	0.371865	chr2L	6122410	6122976	567	+	64	615	409	552	0.4103	0.7201	0.3277	0.2377	-0.271331
Nhe3	3_Junction_12742_Junction_12744*5_Junction_12741_Junction_12742	3_Junction_12742_Junction_12744	J001	0.161971	5.6775	0.0171838	0.152374	4.16116	5.35975	0.36518	chr2L	6680542	6680945	404	-	48	137	184	86	0.6154	0.4228	0.2801	0.1398
Nhe3	3_Junction_12742_Junction_12744*5_Junction_12741_Junction_12742	3_Junction_12742_Junction_12744	J002	0.152662	5.99409	0.0143539	0.135831	6.80284	5.53043	-0.298746	chr2L	6680706	6680945	240	-	30	187	473	529	0.3846	0.5772	0.7199	0.8602
Nhe3	3_Junction_12742_Junction_12744*5_Junction_12741_Junction_12742	5_Junction_12741_Junction_12742	J001	0.197415	3.00732	0.0828892	0.370916	6.3688	5.47867	-0.217197	chr2L	6680542	6680669	128	-	26	212	351	403	0.3514	0.6074	0.6561	0.8241
Nhe3	3_Junction_12742_Junction_12744*5_Junction_12741_Junction_12742	5_Junction_12741_Junction_12742	J002	0.206574	2.88539	0.0893862	0.385737	4.3294	5.16564	0.254778	chr2L	6680542	6680945	404	-	48	137	184	86	0.6486	0.3926	0.3439	0.1759	-0.225058
NONE	3_Junction_15239_Junction_15242*5_Junction_15238_Junction_15239	3_Junction_15239_Junction_15242	J001	0.119978	7.00298	0.0081374	0.0920871	3.1518	4.27496	0.439735	chr2L	9789615	9789789	175	-	50	82	51	58	0.8197	0.8119	0.3953	0.617
NONE	3_Junction_15239_Junction_15242*5_Junction_15238_Junction_15239	3_Junction_15239_Junction_15242	J002	0.132767	6.43529	0.0111875	0.115094	3.24991	2.18541	-0.572496	chr2L	9789732	9789789	58	-	11	19	78	36	0.1803	0.1881	0.6047	0.383
NONE	3_Junction_15239_Junction_15242*5_Junction_15238_Junction_15239	5_Junction_15238_Junction_15239	J001	0.19567	1.4411	0.229961	0.600353	3.91139	3.18006	-0.298627	chr2L	9789615	9789673	59	-	35	36	114	39	0.4118	0.3051	0.6909	0.4021
NONE	3_Junction_15239_Junction_15242*5_Junction_15238_Junction_15239	5_Junction_15238_Junction_15239	J002	0.193291	1.4579	0.227264	0.597299	3.32557	4.06588	0.289967	chr2L	9789615	9789789	175	-	50	82	51	58	0.5882	0.6949	0.3091	0.5979	-0.236703
Trpm	3_Junction_16809_Junction_16811*5_Junction_16808_Junction_16809	3_Junction_16809_Junction_16811	J001	0.207426	19.2981	1.11817e-05	0.000556769	0.709684	2.12258	1.58057	chr2R	11172471	11180276	7806	-	10	18	3	2	0.7143	0.8571	0.0968	0.0571
Trpm	3_Junction_16809_Junction_16811*5_Junction_16808_Junction_16809	3_Junction_16809_Junction_16811	J002	0.175034	21.4539	3.62445e-06	0.00021119	2.39789	1.10738	-1.11462	chr2R	11174915	11180276	5362	-	4	3	28	33	0.2857	0.1429	0.9032	0.9429
Trpm	3_Junction_16809_Junction_16811*5_Junction_16808_Junction_16809	5_Junction_16808_Junction_16809	J001	0.100197	24.2313	8.54333e-07	5.99917e-05	3.06682	1.9297	-0.668369	chr2R	11172471	11174857	2387	-	10	12	49	56	0.5	0.4	0.9423	0.9655
Trpm	3_Junction_16809_Junction_16811*5_Junction_16808_Junction_16809	5_Junction_16808_Junction_16809	J002	0.150188	19.154	1.20583e-05	0.000593937	0.704802	2.13421	1.59841	chr2R	11172471	11180276	7806	-	10	18	3	2	0.5	0.6	0.0577	0.0345	-0.451322
Cbp53E	3_Junction_18561_Junction_18564*5_Junction_18560_Junction_18561	3_Junction_18561_Junction_18564	J001	0.141623	5.44722	0.0195994	0.165154	9.55821	11.0426	0.208272	chr2R	12874255	12881663	7409	+	446	4268	976	413	0.7964	0.788	0.6485	0.3755
Cbp53E	3_Junction_18561_Junction_18564*5_Junction_18560_Junction_18561	3_Junction_18561_Junction_18564	J002	0.14391	5.362	0.0205802	0.170172	9.13589	7.68628	-0.249259	chr2R	12879167	12881663	2497	+	114	1148	529	687	0.2036	0.212	0.3515	0.6245
Cbp53E	3_Junction_18561_Junction_18564*5_Junction_18560_Junction_18561	5_Junction_18560_Junction_18561	J001	0.152253	5.45248	0.0195406	0.164861	9.72665	8.15509	-0.254242	chr2R	12874255	12879154	4900	+	146	1343	664	903	0.2466	0.2394	0.4049	0.6862
Cbp53E	3_Junction_18561_Junction_18564*5_Junction_18560_Junction_18561	5_Junction_18560_Junction_18561	J002	0.150598	5.51169	0.0188898	0.16156	9.50335	11.0989	0.223907	chr2R	12874255	12881663	7409	+	446	4268	976	413	0.7534	0.7606	0.5951	0.3138	-0.303507
CG9646	3_Junction_18674_Junction_18677*5_Junction_18673_Junction_18674	3_Junction_18674_Junction_18677	J001	0.0385264	4.2325	0.0396569	0.250241	9.5334	8.65166	-0.140015	chr2R	12938669	12940772	2104	+	67	689	2101	1289	0.7128	0.6587	0.8281	0.7641
CG9646	3_Junction_18674_Junction_18677*5_Junction_18673_Junction_18674	3_Junction_18674_Junction_18677	J002	0.0407682	4.01101	0.0452039	0.269825	6.12051	7.00641	0.195024	chr2R	12940649	12940772	124	+	27	357	436	398	0.2872	0.3413	0.1719	0.2359
CG9646	3_Junction_18674_Junction_18677*5_Junction_18673_Junction_18674	5_Junction_18673_Junction_18674	J001	0.0201946	2.01262	0.155996	0.506657	4.46603	4.96864	0.153859	chr2R	12938669	12939325	657	+	12	115	234	167	0.1519	0.143	0.1002	0.1147
CG9646	3_Junction_18674_Junction_18677*5_Junction_18673_Junction_18674	5_Junction_18673_Junction_18674	J002	0.0159453	2.3721	0.123521	0.452479	9.3075	8.91821	-0.0616403	chr2R	12938669	12940772	2104	+	67	689	2101	1289	0.8481	0.857	0.8998	0.8853	0.113967
Hsf	3_Junction_19503_Junction_19504*5_Junction_19502_Junction_19503	3_Junction_19503_Junction_19504	J001	0.10336	5.43615	0.0197242	0.165695	6.26369	7.29463	0.219821	chr2R	14018550	14018785	236	-	133	331	323	420	0.9236	0.8133	0.6701	0.6965
Hsf	3_Junction_19503_Junction_19504*5_Junction_19502_Junction_19503	3_Junction_19503_Junction_19504	J002	0.114852	4.98255	0.0256042	0.194896	4.66658	3.72787	-0.324014	chr2R	14018694	14018785	92	-	11	76	159	183	0.0764	0.1867	0.3299	0.3035
Hsf	3_Junction_19503_Junction_19504*5_Junction_19502_Junction_19503	5_Junction_19502_Junction_19503	J001	0.0656115	7.92248	0.00488244	0.0666553	4.58015	3.54654	-0.368985	chr2R	14018550	14018639	90	-	13	61	120	212	0.089	0.1556	0.2709	0.3354
Hsf	3_Junction_19503_Junction_19504*5_Junction_19502_Junction_19503	5_Junction_19502_Junction_19503	J002	0.0568838	8.87372	0.00289305	0.0461708	6.25377	7.30911	0.224971	chr2R	14018550	14018785	236	-	133	331	323	420	0.911	0.8444	0.7291	0.6646	-0.251258
CG5174	3_Junction_19735_Junction_19738*5_Junction_19734_Junction_19735	3_Junction_19735_Junction_19738	J001	0.245489	4.65507	0.030962	0.21799	1.75	2.79437	0.675166	chr2R	14309058	14311630	2573	+	20	17	20	19	0.4878	0.1848	0.0784	0.0812
CG5174	3_Junction_19735_Junction_19738*5_Junction_19734_Junction_19735	3_Junction_19735_Junction_19738	J002	0.192973	5.73706	0.0166105	0.149538	5.21828	3.96205	-0.397327	chr2R	14311376	14311630	255	+	21	75	235	215	0.5122	0.8152	0.9216	0.9188
CG5174	3_Junction_19735_Junction_19738*5_Junction_19734_Junction_19735	5_Junction_19734_Junction_19735	J001	0.428125	1.61984	0.203114	0.571381	5.51078	4.54981	-0.276448	chr2R	14309058	14311372	2315	+	18	158	190	244	0.4737	0.9029	0.9048	0.9278
CG5174	3_Junction_19735_Junction_19738*5_Junction_19734_Junction_19735	5_Junction_19734_Junction_19735	J002	0.503697	1.39217	0.238039	0.607997	1.91717	2.5709	0.423294	chr2R	14309058	14311630	2573	+	20	17	20	19	0.5263	0.0971	0.0952	0.0722	-0.161145
MESK2	3_Junction_22202_Junction_22207*5_Junction_22200_Junction_22202	3_Junction_22202_Junction_22207	J001	0.022008	18.247	1.94032e-05	0.000890358	3.92097	5.06805	0.370218	chr2R	17389984	17398370	8387	+	27	193	99	83	0.4821	0.4187	0.2025	0.2123
MESK2	3_Junction_22202_Junction_22207*5_Junction_22200_Junction_22202	3_Junction_22202_Junction_22207	J002	0.0183895	20.5638	5.76776e-06	0.000318459	6.62075	5.65248	-0.228109	chr2R	17397706	17398370	665	+	29	268	390	308	0.5179	0.5813	0.7975	0.7877
MESK2	3_Junction_22202_Junction_22207*5_Junction_22200_Junction_22202	5_Junction_22200_Junction_22202	J001	0.0558436	13.2611	0.000270971	0.00737654	5.66964	4.2923	-0.401505	chr2R	17389984	17397621	7638	+	28	101	274	222	0.5091	0.3435	0.7346	0.7279
MESK2	3_Junction_22202_Junction_22207*5_Junction_22200_Junction_22202	5_Junction_22200_Junction_22202	J002	0.0597245	12.4837	0.000410523	0.0101388	3.77497	5.19094	0.45953	chr2R	17389984	17398370	8387	+	27	193	99	83	0.4909	0.6565	0.2654	0.2721	-0.199847
CG1648	3_Junction_29494_Junction_29499*5_Junction_29493_Junction_29494	3_Junction_29494_Junction_29499	J001	0.203957	23.6573	1.15107e-06	7.65129e-05	11.6159	7.50582	-0.63002	chr2R	5700169	5707343	7175	-	97	354	2437	5162	0.7951	0.6705	0.9783	0.994
CG1648	3_Junction_29494_Junction_29499*5_Junction_29493_Junction_29494	3_Junction_29494_Junction_29499	J002	0.233692	20.7518	5.22834e-06	0.000292211	2.36308	5.5304	1.22672	chr2R	5706513	5707343	831	-	25	174	54	31	0.2049	0.3295	0.0217	0.006
CG1648	3_Junction_29494_Junction_29499*5_Junction_29493_Junction_29494	5_Junction_29493_Junction_29494	J001	0.306664	14.2473	0.000160289	0.00489882	2.36589	5.49776	1.21646	chr2R	5700169	5706500	6332	-	16	190	53	31	0.1416	0.3493	0.0213	0.006
CG1648	3_Junction_29494_Junction_29499*5_Junction_29493_Junction_29494	5_Junction_29493_Junction_29494	J002	0.271071	16.0665	6.11574e-05	0.00223911	11.6542	7.46974	-0.641724	chr2R	5700169	5707343	7175	-	97	354	2437	5162	0.8584	0.6507	0.9787	0.994	0.375069
nSyb	3_Junction_40033_Junction_40041*5_Junction_40029_Junction_40033	3_Junction_40033_Junction_40041	J001	0.0885606	29.6064	5.29301e-08	5.44942e-06	8.87923	11.8235	0.413151	chr3L	1632454	1635184	2731	-	470	2544	1323	837	0.8453	0.796	0.3775	0.2226
nSyb	3_Junction_40033_Junction_40041*5_Junction_40029_Junction_40033	3_Junction_40033_Junction_40041	J002	0.0885387	29.6135	5.27352e-08	5.44942e-06	11.0444	8.13551	-0.441015	chr3L	1633505	1635184	1680	-	86	652	2182	2923	0.1547	0.204	0.6225	0.7774
nSyb	3_Junction_40033_Junction_40041*5_Junction_40029_Junction_40033	5_Junction_40029_Junction_40033	J001	0.0657623	33.3752	7.5986e-09	9.45887e-07	9.80777	7.04442	-0.477444	chr3L	1632454	1633056	603	-	89	363	1428	1668	0.1592	0.1249	0.5191	0.6659
nSyb	3_Junction_40033_Junction_40041*5_Junction_40029_Junction_40033	5_Junction_40029_Junction_40033	J002	0.0651733	33.6688	6.534e-09	8.36169e-07	8.93437	11.7666	0.397261	chr3L	1632454	1635184	2731	-	470	2544	1323	837	0.8408	0.8751	0.4809	0.3341	-0.510548
Rbp6	3_Junction_40769_Junction_40773*5_Junction_40768_Junction_40769	3_Junction_40769_Junction_40773	J001	0.472299	3.68757	0.0548193	0.300979	6.7366	4.83626	-0.47813	chr3L	17058808	17060235	1428	-	22	256	324	235	0.024	0.224	0.399	0.4159
Rbp6	3_Junction_40769_Junction_40773*5_Junction_40768_Junction_40769	3_Junction_40769_Junction_40773	J002	0.456284	3.81406	0.0508241	0.288236	7.64006	9.78181	0.356516	chr3L	17059940	17060235	296	-	895	887	488	330	0.976	0.776	0.601	0.5841
Rbp6	3_Junction_40769_Junction_40773*5_Junction_40768_Junction_40769	5_Junction_40768_Junction_40769	J001	0.381812	5.54894	0.0184918	0.159151	4.79332	6.62277	0.466411	chr3L	17058808	17059723	916	-	198	325	168	54	0.9	0.5594	0.3415	0.1869
Rbp6	3_Junction_40769_Junction_40773*5_Junction_40768_Junction_40769	5_Junction_40768_Junction_40769	J002	0.383185	5.52972	0.0186961	0.160505	6.70911	4.86118	-0.464817	chr3L	17058808	17060235	1428	-	22	256	324	235	0.1	0.4406	0.6585	0.8131	0.258069
Pten	3_Junction_419_Junction_422*5_Junction_418_Junction_419	3_Junction_419_Junction_422	J001	0.10504	1.56563	0.210843	0.577994	3.83278	4.28036	0.159339	chr2L	10256506	10257393	888	-	62	118	53	75	0.7126	0.5086	0.4309	0.4777
Pten	3_Junction_419_Junction_422*5_Junction_418_Junction_419	3_Junction_419_Junction_422	J002	0.10723	1.54032	0.21457	0.581741	4.13317	3.6847	-0.165704	chr2L	10257122	10257393	272	-	25	114	70	82	0.2874	0.4914	0.5691	0.5223
Pten	3_Junction_419_Junction_422*5_Junction_418_Junction_419	5_Junction_418_Junction_419	J001	0.0290642	9.30039	0.00229105	0.0391164	4.8195	4.0528	-0.249964	chr2L	10256506	10256908	403	-	47	97	119	124	0.4312	0.4512	0.6919	0.6231
Pten	3_Junction_419_Junction_422*5_Junction_418_Junction_419	5_Junction_418_Junction_419	J002	0.0301325	9.06989	0.00259853	0.0429145	3.67424	4.46229	0.280339	chr2L	10256506	10257393	888	-	62	118	53	75	0.5688	0.5488	0.3081	0.3769	-0.167719
Sap47	3_Junction_55869_Junction_55877*5_Junction_55867_Junction_55869	3_Junction_55869_Junction_55877	J001	0.139238	8.46106	0.00362831	0.0538285	12.265	10.5163	-0.221918	chr3R	11780927	11783311	2385	+	405	2172	2829	2883	0.8198	0.9278	0.9688	0.9796
Sap47	3_Junction_55869_Junction_55877*5_Junction_55867_Junction_55869	3_Junction_55869_Junction_55877	J002	0.154746	7.64693	0.0056869	0.0734629	3.85243	5.30555	0.461735	chr3R	11782898	11783311	414	+	89	169	91	60	0.1802	0.0722	0.0312	0.0204
Sap47	3_Junction_55869_Junction_55877*5_Junction_55867_Junction_55869	5_Junction_55867_Junction_55869	J001	0.14606	8.804	0.00300571	0.0476356	6.95182	8.89805	0.356098	chr3R	11780927	11782585	1659	+	186	1299	485	164	0.3147	0.3742	0.1463	0.0538
Sap47	3_Junction_55869_Junction_55877*5_Junction_55867_Junction_55869	5_Junction_55867_Junction_55869	J002	0.143048	8.98661	0.00271964	0.0441233	12.4136	10.3708	-0.259395	chr3R	11780927	11783311	2385	+	405	2172	2829	2883	0.6853	0.6258	0.8537	0.9462	0.283225
CG42613	3_Junction_59047_Junction_59048*5_Junction_59046_Junction_59047	3_Junction_59047_Junction_59048	J001	0.0566649	8.39369	0.00376525	0.0550793	6.26045	5.13538	-0.285794	chr3R	14800892	14801178	287	+	121	180	288	100	0.605	0.5341	0.8348	0.7407
CG42613	3_Junction_59047_Junction_59048*5_Junction_59046_Junction_59047	3_Junction_59047_Junction_59048	J002	0.0620091	7.75108	0.00536804	0.0711563	3.48933	4.59213	0.396215	chr3R	14801003	14801178	176	+	79	157	57	35	0.395	0.4659	0.1652	0.2593
CG42613	3_Junction_59047_Junction_59048*5_Junction_59046_Junction_59047	5_Junction_59046_Junction_59047	J001	0.089574	3.72493	0.0536058	0.297501	3.51303	4.46297	0.345288	chr3R	14800892	14800963	72	+	101	93	58	38	0.455	0.3407	0.1676	0.2754
CG42613	3_Junction_59047_Junction_59048*5_Junction_59046_Junction_59047	5_Junction_59046_Junction_59047	J002	0.0825707	4.01266	0.0451598	0.269679	6.20227	5.19141	-0.256672	chr3R	14800892	14801178	287	+	121	180	288	100	0.545	0.6593	0.8324	0.7246	0.236038
CASK	3_Junction_61410_Junction_61412*5_Junction_61409_Junction_61410	3_Junction_61410_Junction_61412	J001	0.0369437	19.392	1.06454e-05	0.000537887	2.67911	4.11916	0.620598	chr3R	17615482	17617251	1770	-	18	189	35	16	0.36	0.3083	0.0886	0.1111
CASK	3_Junction_61410_Junction_61412*5_Junction_61409_Junction_61410	3_Junction_61410_Junction_61412	J002	0.0281731	23.2282	1.43874e-06	9.3368e-05	6.79332	5.59291	-0.280518	chr3R	17616460	17617251	792	-	32	424	360	128	0.64	0.6917	0.9114	0.8889
CASK	3_Junction_61410_Junction_61412*5_Junction_61409_Junction_61410	5_Junction_61409_Junction_61410	J001	0.0540369	13.3416	0.000259576	0.00718216	6.69263	5.32142	-0.330764	chr3R	17615482	17616429	948	-	58	331	314	151	0.7632	0.6365	0.8997	0.9042
CASK	3_Junction_61410_Junction_61412*5_Junction_61409_Junction_61410	5_Junction_61409_Junction_61410	J002	0.0652834	11.3789	0.00074283	0.0162226	2.69594	4.07257	0.595149	chr3R	17615482	17617251	1770	-	18	189	35	16	0.2368	0.3635	0.1003	0.0958	-0.131638
MESR3	3_Junction_6550_Junction_6554*5_Junction_6549_Junction_6550	3_Junction_6550_Junction_6554	J001	0.157449	7.84474	0.00509688	0.0688279	1.85971	0.803317	-1.21104	chr2L	18617724	18649596	31873	+	2	2	22	11	0.0328	0.037	0.275	0.1864
MESR3	3_Junction_6550_Junction_6554*5_Junction_6549_Junction_6550	3_Junction_6550_Junction_6554	J002	0.083845	11.1786	0.000827482	0.0176766	3.19555	4.01265	0.32849	chr2L	18631774	18649596	17823	+	59	52	58	48	0.9672	0.963	0.725	0.8136
MESR3	3_Junction_6550_Junction_6554*5_Junction_6549_Junction_6550	5_Junction_6549_Junction_6550	J001	0.0608402	19.6724	9.192e-06	0.000476766	3.75854	4.66514	0.311748	chr2L	18617724	18631741	14018	+	136	58	70	45	0.9855	0.9667	0.7609	0.8036
MESR3	3_Junction_6550_Junction_6554*5_Junction_6549_Junction_6550	5_Junction_6549_Junction_6550	J002	0.145804	12.0932	0.000506049	0.011845	2.12649	0.697962	-1.60725	chr2L	18617724	18649596	31873	+	2	2	22	11	0.0145	0.0333	0.2391	0.1964	0.112213
Vha100-1	3_Junction_68778_Junction_68781*5_Junction_68777_Junction_68778	3_Junction_68778_Junction_68781	J001	0.148421	21.3906	3.74609e-06	0.000216435	1.92214	3.96124	1.04324	chr3R	24962421	24962796	376	+	25	145	15	13	0.5319	0.3311	0.0287	0.057
Vha100-1	3_Junction_68778_Junction_68781*5_Junction_68777_Junction_68778	3_Junction_68778_Junction_68781	J002	0.125098	24.7267	6.60642e-07	4.94326e-05	7.48734	4.98904	-0.58569	chr3R	24962632	24962796	165	+	22	293	507	215	0.4681	0.6689	0.9713	0.943
Vha100-1	3_Junction_68778_Junction_68781*5_Junction_68777_Junction_68778	5_Junction_68777_Junction_68778	J001	0.149029	21.742	3.11889e-06	0.000185683	7.92983	5.35862	-0.565428	chr3R	24962421	24962625	205	+	23	367	589	263	0.4792	0.7168	0.9752	0.9529
Vha100-1	3_Junction_68778_Junction_68781*5_Junction_68777_Junction_68778	5_Junction_68777_Junction_68778	J002	0.175559	18.8629	1.40456e-05	0.000671234	1.93886	3.9272	1.01829	chr3R	24962421	24962796	376	+	25	145	15	13	0.5208	0.2832	0.0248	0.0471	-0.248645
alph	3_Junction_69060_Junction_69062*5_Junction_69059_Junction_69060	3_Junction_69060_Junction_69062	J001	0.0778157	2.73892	0.0979308	0.401383	3.97104	4.63167	0.222018	chr3R	25423195	25423884	690	+	29	152	91	93	0.5577	0.517	0.4396	0.2879
alph	3_Junction_69060_Junction_69062*5_Junction_69059_Junction_69060	3_Junction_69060_Junction_69062	J002	0.0750728	2.82282	0.0929332	0.391824	5.10622	4.44185	-0.201097	chr3R	25423630	25423884	255	+	23	142	116	230	0.4423	0.483	0.5604	0.7121
alph	3_Junction_69060_Junction_69062*5_Junction_69059_Junction_69060	5_Junction_69059_Junction_69060	J001	0.0578313	6.52506	0.0106365	0.111154	4.3071	3.4188	-0.333226	chr3R	25423195	25423496	302	+	16	64	91	149	0.3556	0.2963	0.5	0.6157
alph	3_Junction_69060_Junction_69062*5_Junction_69059_Junction_69060	5_Junction_69059_Junction_69060	J002	0.0560286	6.69946	0.0096442	0.103656	3.86886	4.75869	0.298654	chr3R	25423195	25423884	690	+	29	152	91	93	0.6444	0.7037	0.5	0.3843	-0.174324
CG1607	3_Junction_70419_Junction_70420*5_Junction_70418_Junction_70419	3_Junction_70419_Junction_70420	J001	0.0823247	16.8572	4.02999e-05	0.00157215	5.85165	4.25909	-0.458298	chr3R	27215920	27216309	390	+	11	115	204	397	0.275	0.4406	0.7528	0.8254
CG1607	3_Junction_70419_Junction_70420*5_Junction_70418_Junction_70419	3_Junction_70419_Junction_70420	J002	0.0905212	15.6081	7.79197e-05	0.00268754	3.33934	4.94173	0.56545	chr3R	27216081	27216309	229	+	29	146	67	84	0.725	0.5594	0.2472	0.1746
CG1607	3_Junction_70419_Junction_70420*5_Junction_70418_Junction_70419	5_Junction_70418_Junction_70419	J001	0.289261	7.53742	0.00604304	0.0761946	3.14372	4.86563	0.630155	chr3R	27215920	27216018	99	+	57	103	44	82	0.8382	0.4725	0.1774	0.1712
CG1607	3_Junction_70419_Junction_70420*5_Junction_70418_Junction_70419	5_Junction_70418_Junction_70419	J002	0.272921	7.95445	0.00479693	0.0656843	5.97581	4.11406	-0.53857	chr3R	27215920	27216309	390	+	11	115	204	397	0.1618	0.5275	0.8226	0.8288	0.461717
CD98hc	3_Junction_71677_Junction_71679*5_Junction_71676_Junction_71677	3_Junction_71677_Junction_71679	J001	0.311739	4.53525	0.0332037	0.226946	4.838	6.6704	0.463362	chr3R	3800587	3800857	271	-	232	222	127	128	0.5786	0.1806	0.0897	0.0768
CD98hc	3_Junction_71677_Junction_71679*5_Junction_71676_Junction_71677	3_Junction_71677_Junction_71679	J002	0.299728	4.71477	0.0299046	0.213495	10.4865	8.39709	-0.320577	chr3R	3800781	3800857	77	-	169	1007	1289	1539	0.4214	0.8194	0.9103	0.9232
CD98hc	3_Junction_71677_Junction_71679*5_Junction_71676_Junction_71677	5_Junction_71676_Junction_71677	J001	0.356064	3.88628	0.0486821	0.280321	10.3018	8.28856	-0.313705	chr3R	3800587	3800774	188	-	138	1028	1163	1430	0.373	0.8224	0.9016	0.9178
CD98hc	3_Junction_71677_Junction_71679*5_Junction_71676_Junction_71677	5_Junction_71676_Junction_71677	J002	0.369146	3.75001	0.0528071	0.294553	4.8703	6.6323	0.445497	chr3R	3800587	3800857	271	-	232	222	127	128	0.627	0.1776	0.0984	0.0822	-0.219107
skap	3_Junction_72437_Junction_72438*5_Junction_72436_Junction_72437	3_Junction_72437_Junction_72438	J001	0.25329	3.68029	0.0550594	0.302054	2.78435	3.614	0.376257	chr3R	4766911	4767128	218	+	30	96	46	16	0.4286	0.1905	0.1318	0.0541
skap	3_Junction_72437_Junction_72438*5_Junction_72436_Junction_72437	3_Junction_72437_Junction_72438	J002	0.222951	4.12381	0.0422837	0.258637	6.85578	5.79411	-0.242734	chr3R	4767038	4767128	91	+	40	408	303	280	0.5714	0.8095	0.8682	0.9459
skap	3_Junction_72437_Junction_72438*5_Junction_72436_Junction_72437	5_Junction_72436_Junction_72437	J001	0.240721	4.29673	0.0381857	0.245348	7.55816	6.39767	-0.24049	chr3R	4766911	4767034	124	+	48	536	410	388	0.6154	0.8481	0.8991	0.9604
skap	3_Junction_72437_Junction_72438*5_Junction_72436_Junction_72437	5_Junction_72436_Junction_72437	J002	0.27541	3.80369	0.0511399	0.289062	2.76422	3.63876	0.396572	chr3R	4766911	4767128	218	+	30	96	46	16	0.3846	0.1519	0.1009	0.0396	-0.131274
Jupiter	3_Junction_75127_Junction_75132*5_Junction_75126_Junction_75127	3_Junction_75127_Junction_75132	J001	0.190065	6.44309	0.0111385	0.114849	7.06746	4.69098	-0.591301	chr3R	7417029	7418087	1059	-	20	112	900	255	0.25	0.0755	0.4813	0.43
Jupiter	3_Junction_75127_Junction_75132*5_Junction_75126_Junction_75127	3_Junction_75127_Junction_75132	J002	0.185413	6.60634	0.0101616	0.107634	7.35114	10.0056	0.444764	chr3R	7417734	7418087	354	-	60	1372	970	338	0.75	0.9245	0.5187	0.57
Jupiter	3_Junction_75127_Junction_75132*5_Junction_75126_Junction_75127	5_Junction_75126_Junction_75127	J001	0.0780186	18.4012	1.78945e-05	0.000830609	8.83967	11.4098	0.368208	chr3R	7417029	7417715	687	-	181	2205	1718	685	0.9005	0.9517	0.6562	0.7287
Jupiter	3_Junction_75127_Junction_75132*5_Junction_75126_Junction_75127	5_Junction_75126_Junction_75127	J002	0.0818885	17.5622	2.78064e-05	0.00117155	7.06872	4.71459	-0.584316	chr3R	7417029	7418087	1059	-	20	112	900	255	0.0995	0.0483	0.3438	0.2713	0.171689
B52	3_Junction_76906_Junction_76913*5_Junction_76904_Junction_76906	3_Junction_76906_Junction_76913	J001	0.0149114	75.8371	3.08064e-18	2.81221e-15	7.11366	5.11554	-0.475705	chr3R	9488773	9491173	2401	+	70	233	422	181	0.2439	0.2735	0.6862	0.6606
B52	3_Junction_76906_Junction_76913*5_Junction_76904_Junction_76906	3_Junction_76906_Junction_76913	J002	0.0142878	78.2994	8.85499e-19	9.32703e-16	5.4426	7.35883	0.435181	chr3R	9490656	9491173	518	+	217	619	193	93	0.7561	0.7265	0.3138	0.3394
B52	3_Junction_76906_Junction_76913*5_Junction_76904_Junction_76906	5_Junction_76904_Junction_76906	J001	0.119263	4.83126	0.0279481	0.204759	4.32313	5.51926	0.3524	chr3R	9488773	9489175	403	+	102	191	101	94	0.593	0.4505	0.1931	0.3418
B52	3_Junction_76906_Junction_76913*5_Junction_76904_Junction_76906	5_Junction_76904_Junction_76906	J002	0.11474	5.00956	0.0252077	0.193589	6.69862	5.44135	-0.299899	chr3R	9488773	9491173	2401	+	70	233	422	181	0.407	0.5495	0.8069	0.6582	0.338945
Caps	3_Junction_78382_Junction_78387*5_Junction_78381_Junction_78382	3_Junction_78382_Junction_78387	J001	0.0520627	6.95242	0.00837062	0.0939645	5.3	4.51406	-0.231569	chr4	1254609	1259566	4958	+	30	165	118	212	0.4688	0.6022	0.7375	0.7823
Caps	3_Junction_78382_Junction_78387*5_Junction_78381_Junction_78382	3_Junction_78382_Junction_78387	J002	0.0590429	6.33178	0.0118593	0.119817	3.23563	4.04519	0.32216	chr4	1257938	1259566	1629	+	34	109	42	59	0.5312	0.3978	0.2625	0.2177
Caps	3_Junction_78382_Junction_78387*5_Junction_78381_Junction_78382	5_Junction_78381_Junction_78382	J001	0.0850002	0.327083	0.567382	0.833925	2.87313	3.04565	0.0841282	chr4	1254609	1257730	3122	+	16	47	41	50	0.3478	0.2217	0.2579	0.1908
Caps	3_Junction_78382_Junction_78387*5_Junction_78381_Junction_78382	5_Junction_78381_Junction_78382	J002	0.0679055	0.368661	0.543735	0.82342	4.97665	4.80809	-0.04971	chr4	1254609	1259566	4958	+	30	165	118	212	0.6522	0.7783	0.7421	0.8092	0.179241
NONE	3_Junction_78620_Junction_78624*5_Junction_78619_Junction_78620	3_Junction_78620_Junction_78624	J001	0.0832716	5.93046	0.0148814	0.139378	2.27395	1.50286	-0.597495	chr4	1306446	1306601	156	+	5	7	33	28	0.1389	0.2188	0.4231	0.4667
NONE	3_Junction_78620_Junction_78624*5_Junction_78619_Junction_78620	3_Junction_78620_Junction_78624	J002	0.0636056	6.89652	0.00863636	0.0962226	2.54141	3.20553	0.334936	chr4	1306538	1306601	64	+	31	25	45	32	0.8611	0.7812	0.5769	0.5333
NONE	3_Junction_78620_Junction_78624*5_Junction_78619_Junction_78620	5_Junction_78619_Junction_78620	J001	0.0542865	22.9028	1.70405e-06	0.000107035	4.05848	5.18053	0.352163	chr4	1306446	1306510	65	+	158	93	84	59	0.9693	0.93	0.7179	0.6782
NONE	3_Junction_78620_Junction_78624*5_Junction_78619_Junction_78620	5_Junction_78619_Junction_78620	J002	0.10733	14.6252	0.000131147	0.00415694	2.77415	1.22155	-1.18333	chr4	1306446	1306601	156	+	5	7	33	28	0.0307	0.07	0.2821	0.3218	0.178612
CaMKI	3_Junction_79939_Junction_79946*5_Junction_79936_Junction_79939	3_Junction_79939_Junction_79946	J001	0.12	4.72682	0.0296957	0.212558	7.05519	5.98231	-0.237982	chr4	467861	470866	3006	+	36	342	291	539	0.3636	0.5237	0.6299	0.7834
CaMKI	3_Junction_79939_Junction_79946*5_Junction_79936_Junction_79939	3_Junction_79939_Junction_79946	J002	0.123606	4.60074	0.0319581	0.221345	5.02903	6.06668	0.270627	chr4	470594	470866	273	+	63	311	171	149	0.6364	0.4763	0.3701	0.2166
CaMKI	3_Junction_79939_Junction_79946*5_Junction_79936_Junction_79939	5_Junction_79936_Junction_79939	J001	0.058204	3.04574	0.0809492	0.365821	4.73601	5.59222	0.239749	chr4	467861	470548	2688	+	19	285	131	159	0.3455	0.4545	0.3104	0.2278
CaMKI	3_Junction_79939_Junction_79946*5_Junction_79936_Junction_79939	5_Junction_79936_Junction_79939	J002	0.0543996	3.25609	0.0711586	0.346383	6.95645	6.09926	-0.189718	chr4	467861	470866	3006	+	36	342	291	539	0.6545	0.5455	0.6896	0.7722	0.228699
Hk	3_Junction_81647_Junction_81657*5_Junction_81646_Junction_81647	3_Junction_81647_Junction_81657	J001	0.206269	2.52758	0.111872	0.429223	4.68871	4.06972	-0.204261	chrX	10149623	10152909	3287	-	10	159	113	120	0.3125	0.5618	0.6075	0.8
Hk	3_Junction_81647_Junction_81657*5_Junction_81646_Junction_81647	3_Junction_81647_Junction_81657	J002	0.21546	2.43994	0.118281	0.442924	3.34623	3.92666	0.230768	chrX	10152050	10152909	860	-	22	124	73	30	0.6875	0.4382	0.3925	0.2
Hk	3_Junction_81647_Junction_81657*5_Junction_81646_Junction_81647	5_Junction_81646_Junction_81647	J001	0.263734	7.83811	0.0051156	0.0689447	3.58215	5.10728	0.51173	chrX	10149623	10151699	2077	-	54	308	71	21	0.8438	0.6595	0.3859	0.1489
Hk	3_Junction_81647_Junction_81657*5_Junction_81646_Junction_81647	5_Junction_81646_Junction_81647	J002	0.268356	7.71585	0.00547382	0.0721395	5.19827	3.63334	-0.516734	chrX	10149623	10152909	3287	-	10	159	113	120	0.1562	0.3405	0.6141	0.8511	0.378064
Rab3-GEF	3_Junction_89070_Junction_89073*5_Junction_89069_Junction_89070	3_Junction_89070_Junction_89073	J001	0.0258565	29.9685	4.39131e-08	4.6254e-06	4.89275	3.49845	-0.48393	chrX	14997177	15003728	6552	+	12	70	223	103	0.2143	0.2756	0.6246	0.6205
Rab3-GEF	3_Junction_89070_Junction_89073*5_Junction_89069_Junction_89070	3_Junction_89070_Junction_89073	J002	0.0250981	30.5518	3.25064e-08	3.56088e-06	3.96884	5.32269	0.423436	chrX	15000482	15003728	3247	+	44	184	134	63	0.7857	0.7244	0.3754	0.3795
Rab3-GEF	3_Junction_89070_Junction_89073*5_Junction_89069_Junction_89070	5_Junction_89069_Junction_89070	J001	0.0244933	34.5657	4.1211e-09	5.53238e-07	3.99887	5.43956	0.443899	chrX	14997177	15000472	3296	+	46	204	129	66	0.7931	0.7445	0.3665	0.3905
Rab3-GEF	3_Junction_89070_Junction_89073*5_Junction_89069_Junction_89070	5_Junction_89069_Junction_89070	J002	0.0254861	33.6724	6.52206e-09	8.36169e-07	4.95067	3.45366	-0.519497	chrX	14997177	15003728	6552	+	12	70	223	103	0.2069	0.2555	0.6335	0.6095	0.316164
Ranbp16	3_Junction_90198_Junction_90203*5_Junction_90196_Junction_90198	3_Junction_90198_Junction_90203	J001	0.218945	6.56566	0.0103965	0.109592	5.44781	3.56182	-0.613062	chrX	15822963	15823372	410	-	35	80	187	123	0.5932	0.2759	0.8578	0.7736
Ranbp16	3_Junction_90198_Junction_90203*5_Junction_90196_Junction_90198	3_Junction_90198_Junction_90203	J002	0.22576	6.37387	0.0115813	0.11773	2.8231	4.55182	0.689163	chrX	15823291	15823372	82	-	24	210	31	36	0.4068	0.7241	0.1422	0.2264
Ranbp16	3_Junction_90198_Junction_90203*5_Junction_90196_Junction_90198	5_Junction_90196_Junction_90198	J001	0.163019	8.99503	0.00270715	0.0440773	2.98605	4.67998	0.648264	chrX	15822963	15823204	242	-	29	212	50	26	0.4531	0.726	0.211	0.1745
Ranbp16	3_Junction_90198_Junction_90203*5_Junction_90196_Junction_90198	5_Junction_90196_Junction_90198	J002	0.158593	9.23164	0.00237868	0.0401125	5.39781	3.60097	-0.583989	chrX	15822963	15823372	410	-	35	80	187	123	0.5469	0.274	0.789	0.8255	0.402768
Stim	3_Junction_90228_Junction_90230*5_Junction_90227_Junction_90228	3_Junction_90228_Junction_90230	J001	0.181955	1.78311	0.181767	0.543437	3.23329	2.67806	-0.271813	chrX	15830467	15831622	1156	-	13	35	51	66	0.2653	0.4217	0.4397	0.6735
Stim	3_Junction_90228_Junction_90230*5_Junction_90227_Junction_90228	3_Junction_90228_Junction_90230	J002	0.176449	1.82914	0.17623	0.534408	3.00549	3.57819	0.251631	chrX	15831064	15831622	559	-	36	48	65	32	0.7347	0.5783	0.5603	0.3265
Stim	3_Junction_90228_Junction_90230*5_Junction_90227_Junction_90228	5_Junction_90227_Junction_90228	J001	0.065086	5.1808	0.0228378	0.182005	3.47801	4.17056	0.261979	chrX	15830467	15830830	364	-	53	77	64	64	0.803	0.6875	0.5565	0.4923
Stim	3_Junction_90228_Junction_90230*5_Junction_90227_Junction_90228	5_Junction_90227_Junction_90228	J002	0.0751861	4.67019	0.0306906	0.216666	3.33256	2.60771	-0.353852	chrX	15830467	15831622	1156	-	13	35	51	66	0.197	0.3125	0.4435	0.5077	0.17227
beta-Spec	3_Junction_92540_Junction_92541*5_Junction_92539_Junction_92540	3_Junction_92540_Junction_92541	J001	0.623893	4.14138	0.0418469	0.257686	1.31954	2.13992	0.697522	chrX	17561771	17562307	537	+	10	34	9	3	0.4167	0.0518	0.0176	0.0093
beta-Spec	3_Junction_92540_Junction_92541*5_Junction_92539_Junction_92540	3_Junction_92540_Junction_92541	J002	0.499475	5.04073	0.0247581	0.191316	7.89724	6.25919	-0.335371	chrX	17562190	17562307	118	+	14	622	503	318	0.5833	0.9482	0.9824	0.9907
beta-Spec	3_Junction_92540_Junction_92541*5_Junction_92539_Junction_92540	5_Junction_92539_Junction_92540	J001	0.436882	5.4475	0.0195964	0.165154	8.12153	6.48174	-0.325369	chrX	17561771	17562138	368	+	19	673	565	343	0.6552	0.9519	0.9843	0.9913
beta-Spec	3_Junction_92540_Junction_92541*5_Junction_92539_Junction_92540	5_Junction_92539_Junction_92540	J002	0.554836	4.42348	0.0354477	0.235396	1.31277	2.15132	0.712607	chrX	17561771	17562307	537	+	10	34	9	3	0.3448	0.0481	0.0157	0.0087	-0.122633

## Sheet: AS A5SS events
Gene	AS_event_ID	AS_structure_ID	sub_junction_ID	sub-junction_dispersion_estimate	LRT_statistic-full_vs_reduced	LRT_p_value-full_vs_reduced	BH_adjusted_p-values	LNv	TH	fitting_parameter_log2fold_change_TH_LNv	sub_junction_chr	sub_junction_start_coor	sub_junction_end_coor	sub_junction_length	sub_junction_strand	raw_count.IndexA	raw_count.IndexB	raw_count.IndexC	raw_count.IndexD	percentage_usage.IndexA	percentage_usage.IndexB	percentage_usage.IndexC	percentage_usage.IndexD	deltaPSI
CG3523	3_Junction_10168_Junction_10169	3_Junction_10168_Junction_10169	J001	0.0651588	14.0338	0.00017955	0.00532161	6.72046	5.64856	-0.250676	chr2L	3056924	3059603	2680	+	86	85	566	478	0.819	0.8947	0.9642	0.9775	-0.114
CG3523	3_Junction_10168_Junction_10169	3_Junction_10168_Junction_10169	J002	0.116607	9.25918	0.00234318	0.0397585	1.48456	2.70557	0.865893	chr2L	3057110	3059603	2494	+	19	10	21	11	0.181	0.1053	0.0358	0.0225	0.114
RpL35	3_Junction_103178_Junction_103179	3_Junction_103178_Junction_103179	J001	0.0344641	36.8189	1.29629e-09	1.90862e-07	8.75714	6.45229	-0.44065	chrX	5566555	5567029	475	+	238	127	810	714	0.0327	0.0507	0.1821	0.1818	-0.14025
RpL35	3_Junction_103178_Junction_103179	3_Junction_103178_Junction_103179	J002	0.0328228	38.5788	5.2588e-10	8.78155e-08	12.6835	14.9878	0.240838	chrX	5566908	5567029	122	+	7051	2377	3638	3213	0.9673	0.9493	0.8179	0.8182	0.14025
CG4495	3_Junction_13122_Junction_13123	3_Junction_13122_Junction_13123	J001	0.21485	6.94057	0.00842622	0.0944	4.86997	3.57664	-0.445309	chr2L	7184203	7184613	411	+	15	94	150	126	0.4167	0.5371	0.7812	0.9197	-0.37355
CG4495	3_Junction_13122_Junction_13123	3_Junction_13122_Junction_13123	J002	0.23878	6.33671	0.0118264	0.1196	2.38348	3.53875	0.570168	chr2L	7184394	7184613	220	+	21	81	42	11	0.5833	0.4629	0.2188	0.0803	0.37355
CG5065	3_Junction_18120_Junction_18125_Junction_18136_Junction_18141	3_Junction_18120_Junction_18125_Junction_18136_Junction_18141	J001	0.726758	4.46109	0.0346754	0.232181	9.09392	3.38003	-1.42787	chr2R	12495839	12506307	10469	+	29	236	388	260	0.0147	0.2946	0.676	0.5778	-0.47225
CG5065	3_Junction_18120_Junction_18125_Junction_18136_Junction_18141	3_Junction_18120_Junction_18125_Junction_18136_Junction_18141	J002	0.658871	0.104145	0.74691	0.915166	7.22755	4.78754	-0.594223	chr2R	12496830	12506307	9478	+	111	456	155	152	0.0563	0.5693	0.27	0.3378	0.0089
CG5065	3_Junction_18120_Junction_18125_Junction_18136_Junction_18141	3_Junction_18120_Junction_18125_Junction_18136_Junction_18141	J003	0.0380616	3.83981	0.0500491	0.28567	3.34532	3.58062	0.0980679	chr2R	12500078	12506307	6230	+	156	60	19	24	0.0792	0.0749	0.0331	0.0533	0.03385
CG5065	3_Junction_18120_Junction_18125_Junction_18136_Junction_18141	3_Junction_18120_Junction_18125_Junction_18136_Junction_18141	J004	1.04144	2.65623	0.103145	0.411289	2.66151	8.22599	1.62795	chr2R	12505648	12506307	660	+	1674	49	12	14	0.8497	0.0612	0.0209	0.0311	0.42945
Sik3	3_Junction_19984_Junction_19992	3_Junction_19984_Junction_19992	J001	0.112375	3.82465	0.0505039	0.287308	2.06783	1.49424	-0.468711	chr2R	14575873	14579544	3672	+	3	8	25	31	0.2143	0.2667	0.463	0.5849	-0.28345
Sik3	3_Junction_19984_Junction_19992	3_Junction_19984_Junction_19992	J001	0.112375	3.82465	0.0505039	0.287308	2.06783	1.49424	-0.468711	chr2R	14575873	14579544	3672	+	3	8	25	31	0.2143	0.2667	0.463	0.5849	-0.28345
Sik3	3_Junction_19984_Junction_19992	3_Junction_19984_Junction_19992	J002	0.101433	4.05753	0.0439747	0.265848	1.98778	2.54076	0.354106	chr2R	14576246	14579544	3299	+	11	22	29	22	0.7857	0.7333	0.537	0.4151	0.28345
RIC-3	3_Junction_21666_Junction_21668	3_Junction_21666_Junction_21668	J001	0.0301025	28.0682	1.17114e-07	1.10596e-05	6.00275	4.5701	-0.393398	chr2R	16909638	16910937	1300	+	23	150	306	211	0.4894	0.4532	0.8315	0.7844	-0.33665
RIC-3	3_Junction_21666_Junction_21668	3_Junction_21666_Junction_21668	J002	0.0345005	25.3086	4.88514e-07	3.78598e-05	3.29239	4.86031	0.561912	chr2R	16910670	16910937	268	+	24	181	62	58	0.5106	0.5468	0.1685	0.2156	0.33665
14-3-3zeta	3_Junction_30493_Junction_30494_Junction_30499_Junction_30503	3_Junction_30493_Junction_30494_Junction_30499_Junction_30503	J001	0.0124537	4.65408	0.0309799	0.21799	5.25309	4.91966	-0.094607	chr2R	5987243	5991759	4517	+	34	106	185	329	0.0508	0.0597	0.0819	0.0822	-0.0268
14-3-3zeta	3_Junction_30493_Junction_30494_Junction_30499_Junction_30503	3_Junction_30493_Junction_30494_Junction_30499_Junction_30503	J002	0.0618862	2.95432	0.0856481	0.377615	8.96513	10.1934	0.185241	chr2R	5987355	5991759	4405	+	429	875	1008	1535	0.6413	0.493	0.4462	0.3838	0.15215
14-3-3zeta	3_Junction_30493_Junction_30494_Junction_30499_Junction_30503	3_Junction_30493_Junction_30494_Junction_30499_Junction_30503	J003	0.0674872	2.06526	0.150689	0.498884	9.50152	9.24477	-0.0395202	chr2R	5988602	5991759	3158	+	196	783	1044	2121	0.293	0.4411	0.4622	0.5302	-0.12915
14-3-3zeta	3_Junction_30493_Junction_30494_Junction_30499_Junction_30503	3_Junction_30493_Junction_30494_Junction_30499_Junction_30503	J004	0.233532	0.366429	0.544957	0.824177	1.63206	2.20534	0.434307	chr2R	5988930	5991759	2830	+	10	11	22	15	0.0149	0.0062	0.0097	0.0038	0.0038
Syx6	3_Junction_31628_Junction_31631	3_Junction_31628_Junction_31631	J001	0.0178927	8.36547	0.00382418	0.0557663	4.67804	3.96243	-0.239521	chr2R	7107217	7107967	751	+	21	86	158	139	0.1364	0.1632	0.2625	0.2603	-0.1116
Syx6	3_Junction_31628_Junction_31631	3_Junction_31628_Junction_31631	J002	0.0138921	9.8063	0.00173915	0.0313757	6.88512	7.41893	0.10773	chr2R	7107863	7107967	105	+	133	441	444	395	0.8636	0.8368	0.7375	0.7397	0.1116
NONE	3_Junction_35012_Junction_35016	3_Junction_35012_Junction_35016	J001	0.212383	3.37081	0.066361	0.333895	2.2529	1.34778	-0.741196	chr2RHet	2414757	2417314	2558	+	6	9	12	27	0.0545	0.1698	0.2727	0.3293	-0.18885
NONE	3_Junction_35012_Junction_35016	3_Junction_35012_Junction_35016	J002	0.147065	4.52012	0.0334985	0.22832	3.27084	4.21344	0.365338	chr2RHet	2415758	2417314	1557	+	104	44	32	55	0.9455	0.8302	0.7273	0.6707	0.18885
Pdk1	3_Junction_37641_Junction_37775	3_Junction_37641_Junction_37775	J001	0.0685957	7.2088	0.00725468	0.0856365	2.31669	1.59292	-0.540396	chr3L	129888	135456	5569	+	5	5	35	51	0.2632	0.2941	0.6364	0.6145	-0.3468
Pdk1	3_Junction_37641_Junction_37775	3_Junction_37641_Junction_37775	J002	0.0710402	7.08783	0.0077609	0.0893206	1.82113	2.55074	0.48608	chr3L	132530	135456	2927	+	14	12	20	32	0.7368	0.7059	0.3636	0.3855	0.3468
Hsc70Cb	3_Junction_38385_Junction_38387	3_Junction_38385_Junction_38387	J001	0.0413242	4.7853	0.0287037	0.208347	3.1895	2.60791	-0.290435	chr3L	14030211	14030576	366	+	15	20	51	88	0.3409	0.4167	0.5795	0.5906	-0.20625
Hsc70Cb	3_Junction_38385_Junction_38387	3_Junction_38385_Junction_38387	J002	0.0416732	4.76237	0.0290885	0.209747	2.72158	3.30446	0.279974	chr3L	14030236	14030576	341	+	29	28	37	61	0.6591	0.5833	0.4205	0.4094	0.20625
Cep135	3_Junction_39088_Junction_39089	3_Junction_39088_Junction_39089	J001	0.329318	6.40205	0.0113989	0.116481	0.629197	1.69967	1.43367	chr3L	15120384	15120564	181	+	10	12	2	1	0.4348	0.4615	0.1667	0.0161	0.35675
Cep135	3_Junction_39088_Junction_39089	3_Junction_39088_Junction_39089	J002	0.209084	8.97357	0.00273913	0.0443868	2.86601	1.88457	-0.604809	chr3L	15120509	15120564	56	+	13	14	10	61	0.5652	0.5385	0.8333	0.9839	-0.35675
Mbs	3_Junction_39744_Junction_39745	3_Junction_39744_Junction_39745	J001	0.135949	8.50308	0.00354546	0.0532908	3.34172	4.34463	0.378643	chr3L	16057417	16059121	1705	+	41	80	84	58	0.9318	0.9756	0.8155	0.6824	0.20475
Mbs	3_Junction_39744_Junction_39745	3_Junction_39744_Junction_39745	J002	0.206554	6.36699	0.0116263	0.118081	1.96128	1.0045	-0.965322	chr3L	16058534	16059121	588	+	3	2	19	27	0.0682	0.0244	0.1845	0.3176	-0.20475
mub	3_Junction_44603_Junction_44609	3_Junction_44603_Junction_44609	J001	0.250543	5.13064	0.0235071	0.185295	1.48155	2.31433	0.643486	chr3L	21868425	21900444	32020	+	22	55	7	3	0.5238	0.2582	0.1228	0.0545	0.30235
mub	3_Junction_44603_Junction_44609	3_Junction_44603_Junction_44609	J002	0.215011	5.76137	0.0163823	0.148558	4.2982	3.23275	-0.41097	chr3L	21873041	21900444	27404	+	20	158	50	52	0.4762	0.7418	0.8772	0.9455	-0.30235
Shab	3_Junction_46630_Junction_46636	3_Junction_46630_Junction_46636	J001	0.332812	3.80653	0.051053	0.288752	0.923119	1.60437	0.797421	chr3L	2948892	2954683	5792	+	11	23	2	2	0.2895	0.0875	0.0274	0.0263	0.16165
Shab	3_Junction_46630_Junction_46636	3_Junction_46630_Junction_46636	J002	0.241705	4.74864	0.0293215	0.210922	4.89916	3.89492	-0.330941	chr3L	2952107	2954683	2577	+	27	240	71	74	0.7105	0.9125	0.9726	0.9737	-0.16165
cpx	3_Junction_55592_Junction_55921	3_Junction_55592_Junction_55921	J001	0.421503	4.31376	0.0378054	0.244299	2.82569	4.16505	0.559733	chr3R	114695	120840	6146	+	41	99	29	52	0.7885	0.3626	0.089	0.2271	0.4175
cpx	3_Junction_55592_Junction_55921	3_Junction_55592_Junction_55921	J002	0.394467	4.58926	0.032173	0.222063	5.98482	4.38149	-0.449885	chr3R	117991	120840	2850	+	11	174	297	177	0.2115	0.6374	0.911	0.7729	-0.4175
Sap47	3_Junction_55845_Junction_55847	3_Junction_55845_Junction_55847	J001	0.095016	11.6219	0.000651797	0.0144887	9.19663	7.34946	-0.323466	chr3R	11777563	11779878	2316	+	14	624	1583	575	0.3182	0.2478	0.5635	0.7353	-0.3664
Sap47	3_Junction_55845_Junction_55847	3_Junction_55845_Junction_55847	J002	0.0945324	11.678	0.000632423	0.0141039	8.20459	10.0813	0.297175	chr3R	11777572	11779878	2307	+	30	1894	1226	207	0.6818	0.7522	0.4365	0.2647	0.3664
Sap47	3_Junction_55856_Junction_55857	3_Junction_55856_Junction_55857	J001	0.133969	21.5543	3.43955e-06	0.000203321	9.11418	11.8605	0.379979	chr3R	11779956	11780303	348	+	180	3161	1887	391	0.8571	0.7908	0.3722	0.1837	0.546
Sap47	3_Junction_55856_Junction_55857	3_Junction_55856_Junction_55857	J002	0.134006	21.5485	3.44993e-06	0.000203321	11.0542	8.34199	-0.406133	chr3R	11779977	11780303	327	+	30	836	3183	1737	0.1429	0.2092	0.6278	0.8163	-0.546
Xrp1	3_Junction_58948_Junction_58953	3_Junction_58948_Junction_58953	J001	0.0804577	9.03734	0.0026452	0.0434822	5.54228	4.25995	-0.379644	chr3R	14741647	14745143	3497	+	26	28	419	568	0.1294	0.1451	0.454	0.2922	-0.23585
Xrp1	3_Junction_58948_Junction_58953	3_Junction_58948_Junction_58953	J002	0.0774552	9.34562	0.00223519	0.0384093	6.92818	8.35282	0.269788	chr3R	14744347	14745143	797	+	175	165	504	1376	0.8706	0.8549	0.546	0.7078	0.23585
hdc	3_Junction_69587_Junction_69722	3_Junction_69587_Junction_69722	J001	0.172393	11.0718	0.000876514	0.0183946	3.79552	2.79662	-0.440616	chr3R	25976779	26160672	183894	+	25	22	75	91	0.7143	0.6111	0.9868	0.9286	-0.295
hdc	3_Junction_69587_Junction_69722	3_Junction_69587_Junction_69722	J002	0.318803	7.19345	0.00731702	0.0858941	0.888434	1.98642	1.16083	chr3R	26134412	26160672	26261	+	10	14	1	7	0.2857	0.3889	0.0132	0.0714	0.295
pan	3_Junction_77930_Junction_78048	3_Junction_77930_Junction_78048	J001	0.267381	6.41248	0.0113321	0.11626	2.9657	4.59146	0.630577	chr4	107792	115047	7256	+	44	291	36	15	0.6377	0.6629	0.36	0.0949	0.42285
pan	3_Junction_77930_Junction_78048	3_Junction_77930_Junction_78048	J002	0.26947	6.36596	0.011633	0.118081	5.2738	3.48497	-0.597696	chr4	113899	115047	1149	+	25	148	64	143	0.3623	0.3371	0.64	0.9051	-0.42285
NONE	3_Junction_80804_Junction_81025	3_Junction_80804_Junction_81025	J001	0.516013	3.81699	0.0507355	0.287907	1.46265	3.01412	1.04315	chrM	1044	4532	3489	+	123	21	2	5	0.6833	0.1667	0.0645	0.0568	0.36435
NONE	3_Junction_80804_Junction_81025	3_Junction_80804_Junction_81025	J002	0.507798	3.873	0.0490688	0.281955	5.10843	2.81501	-0.859737	chrM	1729	4532	2804	+	57	105	29	83	0.3167	0.8333	0.9355	0.9432	-0.36435
NONE	3_Junction_80889_Junction_80892	3_Junction_80889_Junction_80892	J001	0.218774	4.60817	0.0318199	0.220836	6.62635	4.66719	-0.505659	chrM	12841	13343	503	+	171	474	84	104	0.3519	0.1192	0.5957	0.5	-0.3123
NONE	3_Junction_80889_Junction_80892	3_Junction_80889_Junction_80892	J002	0.209994	4.79595	0.0285267	0.207553	6.2521	8.34041	0.415778	chrM	12858	13343	486	+	315	3502	57	104	0.6481	0.8808	0.4043	0.5	0.3123
fne	3_Junction_84814_Junction_84815	3_Junction_84814_Junction_84815	J001	0.0521031	5.51043	0.0189034	0.161576	7.06043	6.18702	-0.190511	chrX	12811847	12812608	762	+	49	388	440	313	0.374	0.4292	0.6627	0.5397	-0.1996
fne	3_Junction_84814_Junction_84815	3_Junction_84814_Junction_84815	J002	0.0523101	5.4912	0.0191124	0.162693	6.05491	6.92742	0.194213	chrX	12812046	12812608	563	+	82	516	224	267	0.626	0.5708	0.3373	0.4603	0.1996
futsch	3_Junction_85079_Junction_85103_Junction_85107	3_Junction_85079_Junction_85103_Junction_85107	J001	0.148678	0.908214	0.340589	0.688847	6.2426	5.8666	-0.0896215	chrX	1304154	1307449	3296	+	59	229	257	413	0.6782	0.4421	0.3473	0.4976	0.1377
futsch	3_Junction_85079_Junction_85103_Junction_85107	3_Junction_85079_Junction_85103_Junction_85107	J002	0.254033	1.45883	0.227117	0.59717	6.87472	5.59152	-0.298061	chrX	1306011	1307449	1439	+	16	265	469	399	0.1839	0.5116	0.6338	0.4807	-0.2095
futsch	3_Junction_85079_Junction_85103_Junction_85107	3_Junction_85079_Junction_85103_Junction_85107	J003	0.195748	4.1856	0.0407687	0.254123	1.66326	2.51353	0.5957	chrX	1306067	1307449	1383	+	12	24	14	18	0.1379	0.0463	0.0189	0.0217	0.0718
rdgB	3_Junction_86023_Junction_86028	3_Junction_86023_Junction_86028	J001	0.171076	5.37659	0.0204088	0.169265	1.62936	0.803064	-1.02072	chrX	13656901	13661818	4918	+	2	1	20	13	0.087	0.0222	0.2273	0.2653	-0.1917
rdgB	3_Junction_86023_Junction_86028	3_Junction_86023_Junction_86028	J002	0.0868455	7.64999	0.00567725	0.0734629	2.81766	3.41989	0.279453	chrX	13657121	13661818	4698	+	21	44	68	36	0.913	0.9778	0.7727	0.7347	0.1917
nrv3	3_Junction_8671_Junction_8682_Junction_8685_Junction_8709	3_Junction_8671_Junction_8682_Junction_8685_Junction_8709	J001	0.134405	0.832129	0.361658	0.704938	7.65238	7.28091	-0.0717891	chr2L	21380361	21382017	1657	+	57	493	365	939	0.6064	0.8272	0.8202	0.823	-0.1048
nrv3	3_Junction_8671_Junction_8682_Junction_8685_Junction_8709	3_Junction_8671_Junction_8682_Junction_8685_Junction_8709	J002	0.131071	1.89414	0.168736	0.52428	1.80027	1.08496	-0.73057	chr2L	21380600	21382017	1418	+	2	4	12	28	0.0213	0.0067	0.027	0.0245	-0.01175
nrv3	3_Junction_8671_Junction_8682_Junction_8685_Junction_8709	3_Junction_8671_Junction_8682_Junction_8685_Junction_8709	J003	0.229608	0.221479	0.637915	0.864763	3.65675	2.72338	-0.425166	chr2L	21380728	21382017	1290	+	15	25	43	144	0.1596	0.0419	0.0966	0.1262	-0.01065
nrv3	3_Junction_8671_Junction_8682_Junction_8685_Junction_8709	3_Junction_8671_Junction_8682_Junction_8685_Junction_8709	J004	0.142335	7.32621	0.0067956	0.0818401	2.1112	3.83784	0.862233	chr2L	21381832	21382017	186	+	20	74	25	30	0.2128	0.1242	0.0562	0.0263	0.12725
NONE	3_Junction_91357_Junction_91365	3_Junction_91357_Junction_91365	J001	0.0344813	7.35771	0.00667759	0.0810987	3.27504	2.53282	-0.370769	chrX	16465121	16468950	3830	+	17	10	70	103	0.2833	0.2632	0.5185	0.4882	-0.2301
NONE	3_Junction_91357_Junction_91365	3_Junction_91357_Junction_91365	J002	0.0316417	7.69643	0.00553302	0.0725203	3.27141	3.95704	0.27451	chrX	16467891	16468950	1060	+	43	28	65	108	0.7167	0.7368	0.4815	0.5118	0.2301
Ntf-2	3_Junction_96275_Junction_96276	3_Junction_96275_Junction_96276	J001	0.0970016	6.26168	0.0123377	0.122866	6.81766	5.5029	-0.309085	chrX	20907664	20909771	2108	+	62	180	443	377	0.6889	0.4945	0.7925	0.8491	-0.2291
Ntf-2	3_Junction_96275_Junction_96276	3_Junction_96275_Junction_96276	J002	0.105828	5.75984	0.0163966	0.148589	3.82635	5.0782	0.408348	chrX	20909021	20909771	751	+	28	184	116	67	0.3111	0.5055	0.2075	0.1509	0.2291
lilli	3_Junction_9857_Junction_9887_Junction_9895	3_Junction_9857_Junction_9887_Junction_9895	J001	0.0699017	3.92329	0.0476216	0.276893	5.52085	4.05969	-0.443521	chr2L	2788240	2935924	147685	+	201	24	54	117	0.1363	0.2474	0.3273	0.325	-0.1343
lilli	3_Junction_9857_Junction_9887_Junction_9895	3_Junction_9857_Junction_9887_Junction_9895	J002	0.0414682	1.2324	0.266941	0.633048	2.94047	3.3796	0.200806	chr2L	2814254	2935924	121671	+	138	13	13	25	0.0936	0.134	0.0788	0.0694	0.0397
lilli	3_Junction_9857_Junction_9887_Junction_9895	3_Junction_9857_Junction_9887_Junction_9895	J003	0.0654124	1.55797	0.211963	0.579511	6.87503	7.67916	0.159582	chr2L	2817986	2935924	117939	+	1136	60	98	218	0.7702	0.6186	0.5939	0.6056	0.09465
Nckx30C	5_Junction_15179_Junction_15180	5_Junction_15179_Junction_15180	J001	0.0260145	16.9684	3.80081e-05	0.00149984	5.32612	4.23904	-0.329347	chr2L	9727256	9732914	5659	-	18	265	129	71	0.2857	0.326	0.5708	0.6174	-0.28825
Nckx30C	5_Junction_15179_Junction_15180	5_Junction_15179_Junction_15180	J002	0.0238187	17.9946	2.21533e-05	0.000981699	4.64042	5.65559	0.285424	chr2L	9727256	9732953	5698	-	45	548	97	44	0.7143	0.674	0.4292	0.3826	0.28825
Pino	5_Junction_1721_Junction_1722	5_Junction_1721_Junction_1722	J001	0.556326	5.79355	0.0160851	0.146251	1.65583	3.70234	1.16089	chr2L	1117516	1118564	1049	-	208	46	5	3	0.9083	0.4259	0.0962	0.1429	0.54755
Pino	5_Junction_1721_Junction_1722	5_Junction_1721_Junction_1722	J002	0.595971	5.43718	0.0197125	0.165695	4.35008	1.91215	-1.18585	chr2L	1117516	1128127	10612	-	21	62	47	18	0.0917	0.5741	0.9038	0.8571	-0.54755
unc-104	5_Junction_18324_Junction_18325	5_Junction_18324_Junction_18325	J001	0.0391967	5.16758	0.0230122	0.182882	3.61063	4.27898	0.245018	chr2R	12651879	12652831	953	-	43	44	65	155	0.7288	0.6286	0.5039	0.4697	0.1919
unc-104	5_Junction_18324_Junction_18325	5_Junction_18324_Junction_18325	J002	0.0410902	5.01238	0.0251666	0.193382	3.73803	3.05247	-0.292302	chr2R	12651879	12653336	1458	-	16	26	64	175	0.2712	0.3714	0.4961	0.5303	-0.1919
HmgZ	5_Junction_22399_Junction_22401	5_Junction_22399_Junction_22401	J001	0.0137486	11.9457	0.000547737	0.0126478	7.15149	7.91585	0.146499	chr2R	17586105	17590180	4076	-	85	647	547	416	0.6746	0.7229	0.5421	0.5614	0.147
HmgZ	5_Junction_22399_Junction_22401	5_Junction_22399_Junction_22401	J002	0.0146096	11.3557	0.000752165	0.0163742	6.68611	5.85674	-0.191069	chr2R	17586105	17591826	5722	-	41	248	462	325	0.3254	0.2771	0.4579	0.4386	-0.147
Dscam1	5_Junction_26312_Junction_26313	5_Junction_26312_Junction_26313	J001	0.0811017	7.24509	0.0071095	0.0842737	2.4832	3.09132	0.316024	chr2R	3210837	3212073	1237	-	12	32	63	32	0.9231	0.9412	0.7159	0.6667	0.24085
Dscam1	5_Junction_26312_Junction_26313	5_Junction_26312_Junction_26313	J002	0.130531	5.7981	0.0160435	0.146164	1.65736	0.860828	-0.94509	chr2R	3210837	3212085	1249	-	1	2	25	16	0.0769	0.0588	0.2841	0.3333	-0.24085
Nmda1	5_Junction_33571_Junction_33572	5_Junction_33571_Junction_33572	J001	0.124357	14.1363	0.000170028	0.00509452	4.10384	5.98902	0.545345	chr2R	8766215	8766555	341	-	40	220	138	135	0.7547	0.582	0.2639	0.1577	0.45755
Nmda1	5_Junction_33571_Junction_33572	5_Junction_33571_Junction_33572	J002	0.117308	14.8828	0.000114401	0.00372087	6.94257	5.02549	-0.466205	chr2R	8766215	8766700	486	-	13	158	385	721	0.2453	0.418	0.7361	0.8423	-0.45755
MFS17	5_Junction_34691_Junction_34692_Junction_34693_Junction_34695_Junction_34697	5_Junction_34691_Junction_34692_Junction_34693_Junction_34695_Junction_34697	J001	0.035984	0.86322	0.352839	0.699363	3.45978	3.75428	0.117855	chr2RHet	1265686	1286304	20619	-	45	102	43	49	0.0974	0.075	0.0739	0.0577	0.0204
MFS17	5_Junction_34691_Junction_34692_Junction_34693_Junction_34695_Junction_34697	5_Junction_34691_Junction_34692_Junction_34693_Junction_34695_Junction_34697	J002	0.100289	0.00524089	0.942288	0.983024	2.62822	2.5512	-0.0429073	chr2RHet	1265686	1286306	20621	-	11	56	15	36	0.0238	0.0412	0.0258	0.0424	-0.0016
MFS17	5_Junction_34691_Junction_34692_Junction_34693_Junction_34695_Junction_34697	5_Junction_34691_Junction_34692_Junction_34693_Junction_34695_Junction_34697	J003	0.0539531	5.87185	0.0153849	0.142438	3.79233	5.11863	0.432674	chr2RHet	1265686	1291240	25555	-	68	264	58	55	0.1472	0.1941	0.0997	0.0648	0.0884
MFS17	5_Junction_34691_Junction_34692_Junction_34693_Junction_34695_Junction_34697	5_Junction_34691_Junction_34692_Junction_34693_Junction_34695_Junction_34697	J004	0.02396	0.00227056	0.961995	0.989082	7.78145	7.61237	-0.0316937	chr2RHet	1265686	1292102	26417	-	244	752	289	491	0.5281	0.5529	0.4966	0.5783	0.00305
MFS17	5_Junction_34691_Junction_34692_Junction_34693_Junction_34695_Junction_34697	5_Junction_34691_Junction_34692_Junction_34693_Junction_34695_Junction_34697	J005	0.0470873	4.27105	0.0387669	0.246625	6.21519	4.9314	-0.333802	chr2RHet	1265686	1293054	27369	-	94	186	177	218	0.2035	0.1368	0.3041	0.2568	-0.1103
uex	5_Junction_35230_Junction_35232	5_Junction_35230_Junction_35232	J001	0.145524	5.9771	0.0144928	0.136768	1.94238	2.91381	0.585083	chr2RHet	3169621	3171888	2268	-	18	64	17	11	0.2278	0.1481	0.0733	0.0312	0.1357
uex	5_Junction_35230_Junction_35232	5_Junction_35230_Junction_35232	J002	0.108554	7.54449	0.0060194	0.0761445	6.82506	5.68668	-0.263255	chr2RHet	3169621	3174708	5088	-	61	368	215	342	0.7722	0.8519	0.9267	0.9688	-0.1357
CG40498	5_Junction_35388_Junction_35396	5_Junction_35388_Junction_35396	J001	0.0216012	30.4369	3.44909e-08	3.74829e-06	4.57563	5.92453	0.372731	chr2RHet	54284	55763	1480	-	49	227	141	172	0.7313	0.7323	0.374	0.4205	0.33455
CG40498	5_Junction_35388_Junction_35396	5_Junction_35388_Junction_35396	J002	0.0219373	30.1088	4.08478e-08	4.33588e-06	5.39799	4.01779	-0.426019	chr2RHet	54284	77839	23556	-	18	83	236	237	0.2687	0.2677	0.626	0.5795	-0.33455
CG17684	5_Junction_35695_Junction_35698_Junction_35701_Junction_35705	5_Junction_35695_Junction_35698_Junction_35701_Junction_35705	J001	0.0231285	10.449	0.00122717	0.0239028	4.42689	3.47689	-0.348499	chr2RHet	916757	917160	404	-	38	48	80	146	0.239	0.2319	0.3941	0.4411	-0.18215
CG17684	5_Junction_35695_Junction_35698_Junction_35701_Junction_35705	5_Junction_35695_Junction_35698_Junction_35701_Junction_35705	J002	0.0757722	5.93809	0.014817	0.139061	2.40299	1.40483	-0.774435	chr2RHet	916757	918928	2172	-	4	9	23	34	0.0252	0.0435	0.1133	0.1027	-0.07365
CG17684	5_Junction_35695_Junction_35698_Junction_35701_Junction_35705	5_Junction_35695_Junction_35698_Junction_35701_Junction_35705	J003	0.0256413	26.3338	2.87219e-07	2.39811e-05	2.94213	4.61538	0.649587	chr2RHet	916757	934343	17587	-	75	90	37	51	0.4717	0.4348	0.1823	0.1541	0.28505
CG17684	5_Junction_35695_Junction_35698_Junction_35701_Junction_35705	5_Junction_35695_Junction_35698_Junction_35701_Junction_35705	J004	0.0202809	0.295509	0.586712	0.844869	3.86326	3.73258	-0.049642	chr2RHet	916757	948010	31254	-	42	60	63	100	0.2642	0.2899	0.3103	0.3021	-0.02915
CG12355	5_Junction_39242_Junction_39243	5_Junction_39242_Junction_39243	J001	0.318558	4.13452	0.042017	0.258115	5.70695	4.39442	-0.377048	chr3L	15486681	15487038	358	-	40	161	169	188	0.4124	0.5855	0.7161	0.9353	-0.32675
CG12355	5_Junction_39242_Junction_39243	5_Junction_39242_Junction_39243	J002	0.33444	3.95186	0.0468195	0.274678	3.11678	4.2568	0.449713	chr3L	15486681	15487665	985	-	57	114	67	13	0.5876	0.4145	0.2839	0.0647	0.32675
CG7971	5_Junction_40408_Junction_40410	5_Junction_40408_Junction_40410	J001	0.139232	5.85319	0.0155489	0.143471	3.80488	4.74052	0.317194	chr3L	1664021	1664088	68	-	29	281	55	54	0.6905	0.4151	0.2218	0.2298	0.327
CG7971	5_Junction_40408_Junction_40410	5_Junction_40408_Junction_40410	J002	0.131749	6.12179	0.0133526	0.129213	6.20891	5.1951	-0.257189	chr3L	1664021	1664530	510	-	13	396	193	181	0.3095	0.5849	0.7782	0.7702	-0.327
Eip75B	5_Junction_41363_Junction_41364	5_Junction_41363_Junction_41364	J001	0.0673306	9.38711	0.00218516	0.0377795	3.26644	2.53426	-0.366152	chr3L	17952720	17954103	1384	-	14	40	30	65	0.5833	0.5714	0.8333	0.8904	-0.2845
Eip75B	5_Junction_41363_Junction_41364	5_Junction_41363_Junction_41364	J002	0.0927175	7.73022	0.00543041	0.0717747	1.32561	2.1962	0.728352	chr3L	17952720	17962461	9742	-	10	30	6	8	0.4167	0.4286	0.1667	0.1096	0.2845
Pdp1	5_Junction_50955_Junction_50959	5_Junction_50955_Junction_50959	J001	0.0618328	58.6579	1.87611e-14	8.28696e-12	6.58642	3.75747	-0.809734	chr3L	7811323	7823485	12163	-	16	46	534	588	0.1882	0.2233	0.8153	0.8789	-0.64135
Pdp1	5_Junction_50955_Junction_50959	5_Junction_50955_Junction_50959	J002	0.0676312	54.345	1.68209e-13	5.75823e-11	3.3366	6.32416	0.922497	chr3L	7811323	7846281	34959	-	69	160	121	81	0.8118	0.7767	0.1847	0.1211	0.64135
Pdp1	5_Junction_51022_Junction_51025	5_Junction_51022_Junction_51025	J001	0.09563	22.9862	1.6317e-06	0.000102963	0.736147	2.55534	1.79545	chr3L	7847289	7848307	1019	-	47	61	1	1	0.2831	0.2111	0.0088	0.0161	0.23465
Pdp1	5_Junction_51022_Junction_51025	5_Junction_51022_Junction_51025	J002	0.066102	27.8561	1.30679e-07	1.21727e-05	5.79487	4.20782	-0.461703	chr3L	7847289	7848377	1089	-	119	228	113	61	0.7169	0.7889	0.9912	0.9839	-0.23465
PRL-1	5_Junction_5109_Junction_5112	5_Junction_5109_Junction_5112	J001	0.138515	8.52176	0.00350925	0.052974	4.13918	2.7019	-0.615371	chr2L	16250158	16251239	1082	-	9	7	176	399	0.1233	0.0603	0.2729	0.4409	-0.2651
PRL-1	5_Junction_5109_Junction_5112	5_Junction_5109_Junction_5112	J002	0.130373	8.9639	0.00275367	0.0445172	5.17385	6.9497	0.425711	chr2L	16250158	16257074	6917	-	64	109	469	506	0.8767	0.9397	0.7271	0.5591	0.2651
bol	5_Junction_52356_Junction_52358	5_Junction_52356_Junction_52358	J001	0.0270025	19.2685	1.13564e-05	0.000561386	3.14155	4.28261	0.447013	chr3L	9106587	9116714	10128	-	58	206	41	17	0.5133	0.5112	0.2455	0.1932	0.2929
bol	5_Junction_52356_Junction_52358	5_Junction_52356_Junction_52358	J002	0.0251766	20.1294	7.23743e-06	0.000384117	5.26441	4.20229	-0.325096	chr3L	9106587	9122995	16409	-	55	197	126	71	0.4867	0.4888	0.7545	0.8068	-0.2929
Rdl	5_Junction_52536_Junction_52537	5_Junction_52536_Junction_52537	J001	0.0829918	7.14986	0.00749697	0.0870704	3.13825	2.13432	-0.556184	chr3L	9156074	9161898	5825	-	12	49	19	36	0.12	0.1014	0.2375	0.3673	-0.1917
Rdl	5_Junction_52536_Junction_52537	5_Junction_52536_Junction_52537	J002	0.0575186	9.52187	0.00203037	0.0354163	4.47112	5.35908	0.261349	chr3L	9156074	9163736	7663	-	88	434	61	62	0.88	0.8986	0.7625	0.6327	0.1917
Rim	5_Junction_57268_Junction_57269	5_Junction_57268_Junction_57269	J001	0.0821593	4.19371	0.0405742	0.25317	4.00304	4.67594	0.22416	chr3R	13701267	13702052	786	-	18	246	91	47	0.4186	0.2805	0.2022	0.1347	0.1811
Rim	5_Junction_57268_Junction_57269	5_Junction_57268_Junction_57269	J002	0.0731915	4.56619	0.032609	0.224154	7.21679	6.51042	-0.148607	chr3R	13701267	13702787	1521	-	25	631	359	302	0.5814	0.7195	0.7978	0.8653	-0.1811
Ssdp	5_Junction_57803_Junction_57804	5_Junction_57803_Junction_57804	J001	0.0614697	6.3945	0.0114474	0.116803	2.98919	3.86211	0.369638	chr3R	14022842	14024422	1581	-	28	59	46	74	0.4746	0.343	0.218	0.1766	0.2115
Ssdp	5_Junction_57803_Junction_57804	5_Junction_57803_Junction_57804	J002	0.0503319	7.41594	0.00646484	0.0796472	5.47881	4.66307	-0.232582	chr3R	14022842	14024927	2086	-	31	113	165	345	0.5254	0.657	0.782	0.8234	-0.2115
Ada2a	5_Junction_57890_Junction_57891	5_Junction_57890_Junction_57891	J001	0.0565057	5.06862	0.0243628	0.190193	1.71211	2.39205	0.48247	chr3R	14079177	14079246	70	-	12	29	13	14	0.2727	0.2736	0.1262	0.1197	0.1502
Ada2a	5_Junction_57890_Junction_57891	5_Junction_57890_Junction_57891	J002	0.0356939	6.52879	0.0106142	0.111154	4.21743	3.72127	-0.18057	chr3R	14079177	14081037	1861	-	32	77	90	103	0.7273	0.7264	0.8738	0.8803	-0.1502
kra	5_Junction_58046_Junction_58047_Junction_58049	5_Junction_58046_Junction_58047_Junction_58049	J001	0.103477	4.35533	0.0368932	0.241182	2.54738	1.97222	-0.369194	chr3R	1425086	1425758	673	-	5	9	28	94	0.0847	0.0592	0.1451	0.2362	-0.1187
kra	5_Junction_58046_Junction_58047_Junction_58049	5_Junction_58046_Junction_58047_Junction_58049	J002	0.38364	0.386387	0.534205	0.818035	3.09848	3.36699	0.119899	chr3R	1425086	1426008	923	-	25	13	70	114	0.4237	0.0855	0.3627	0.2864	-0.06995
kra	5_Junction_58046_Junction_58047_Junction_58049	5_Junction_58046_Junction_58047_Junction_58049	J003	0.293658	1.30318	0.253634	0.620734	3.75215	5.46814	0.543333	chr3R	1425086	1426735	1650	-	29	130	95	190	0.4915	0.8553	0.4922	0.4774	0.1886
unc79	5_Junction_59289_Junction_59290	5_Junction_59289_Junction_59290	J001	0.0468965	18.4891	1.70878e-05	0.000803168	1.68505	3.05255	0.857225	chr3R	15066560	15067374	815	-	15	140	8	5	0.3488	0.3431	0.0833	0.0676	0.2705
unc79	5_Junction_59289_Junction_59290	5_Junction_59289_Junction_59290	J002	0.0357342	21.4181	3.69272e-06	0.000214256	5.15743	4.03523	-0.354003	chr3R	15066560	15068245	1686	-	28	268	88	69	0.6512	0.6569	0.9167	0.9324	-0.2705
CASK	5_Junction_61403_Junction_61404	5_Junction_61403_Junction_61404	J001	0.28445	12.5116	0.000404429	0.0100323	4.22974	6.49736	0.619284	chr3R	17613824	17614594	771	-	70	704	112	13	0.8046	0.6673	0.244	0.0605	0.5837
CASK	5_Junction_61403_Junction_61404	5_Junction_61403_Junction_61404	J002	0.285177	12.4818	0.000410942	0.0101388	7.27729	4.86376	-0.58133	chr3R	17613824	17615169	1346	-	17	351	347	202	0.1954	0.3327	0.756	0.9395	-0.5837
IA-2	5_Junction_623_Junction_625	5_Junction_623_Junction_625	J001	0.024343	15.8418	6.88652e-05	0.00244928	5.41662	6.54457	0.272904	chr2L	1034190	1042962	8773	-	44	259	327	256	0.5116	0.5088	0.3045	0.2517	0.2321
IA-2	5_Junction_623_Junction_625	5_Junction_623_Junction_625	J002	0.0229081	16.6341	4.53293e-05	0.00173864	7.53925	6.4652	-0.221726	chr2L	1034190	1046808	12619	-	42	250	747	761	0.4884	0.4912	0.6955	0.7483	-0.2321
jdp	5_Junction_69958_Junction_69959	5_Junction_69958_Junction_69959	J001	0.355872	3.96217	0.0465336	0.273628	7.09074	8.10618	0.193088	chr3R	26344295	26345328	1034	-	239	2017	314	13	0.7221	0.5773	0.4392	0.0963	0.38195
jdp	5_Junction_69958_Junction_69959	5_Junction_69958_Junction_69959	J002	0.35768	3.9433	0.0470583	0.275136	8.16932	7.1462	-0.193039	chr3R	26344295	26345367	1073	-	92	1477	401	122	0.2779	0.4227	0.5608	0.9037	-0.38195
Jupiter	5_Junction_75140_Junction_75142	5_Junction_75140_Junction_75142	J001	0.149737	7.757	0.00535047	0.0710611	7.61695	6.16065	-0.306131	chr3R	7419488	7429862	10375	-	39	433	429	482	0.3514	0.5828	0.7606	0.8623	-0.34435
Jupiter	5_Junction_75140_Junction_75142	5_Junction_75140_Junction_75142	J002	0.156292	7.45376	0.00633041	0.0785691	4.50817	5.85934	0.378198	chr3R	7419488	7445424	25937	-	72	310	135	77	0.6486	0.4172	0.2394	0.1377	0.34435
PMCA	5_Junction_79318_Junction_79319	5_Junction_79318_Junction_79319	J001	0.127622	3.95523	0.0467259	0.274355	5.40948	4.1632	-0.377798	chr4	373216	374567	1352	-	16	77	215	382	0.5926	0.3468	0.6495	0.7579	-0.234
PMCA	5_Junction_79318_Junction_79319	5_Junction_79318_Junction_79319	J002	0.135151	3.73142	0.053398	0.297228	3.73562	4.99318	0.418612	chr4	373216	374975	1760	-	11	145	116	122	0.4074	0.6532	0.3505	0.2421	0.234
CG14408	5_Junction_88819_Junction_88820	5_Junction_88819_Junction_88820	J001	0.131595	11.0873	0.000869198	0.0182825	4.83083	3.34323	-0.531028	chrX	14722064	14722692	629	-	12	110	109	103	0.0828	0.1217	0.3187	0.5309	-0.32255
CG14408	5_Junction_88819_Junction_88820	5_Junction_88819_Junction_88820	J002	0.117354	12.2751	0.000459053	0.0111086	5.7432	7.38348	0.362447	chrX	14722064	14723167	1104	-	133	794	233	91	0.9172	0.8783	0.6813	0.4691	0.32255
CG3625	5_Junction_9920_Junction_9922	5_Junction_9920_Junction_9922	J001	0.0629684	23.8764	1.02721e-06	7.03282e-05	4.63163	6.74468	0.54223	chr2L	284968	285431	464	-	66	285	209	158	0.3173	0.3687	0.1008	0.0588	0.2632
CG3625	5_Junction_9920_Junction_9922	5_Junction_9920_Junction_9922	J002	0.0578185	25.8669	3.65788e-07	2.94632e-05	10.376	8.19009	-0.341294	chr2L	284968	290811	5844	-	142	488	1864	2531	0.6827	0.6313	0.8992	0.9412	-0.2632

## Sheet: AS A3SS events
Gene	AS_event_ID	AS_structure_ID	sub_junction_ID	sub-junction_dispersion_estimate	LRT_statistic-full_vs_reduced	LRT_p_value-full_vs_reduced	BH_adjusted_p-values	LNv	TH	fitting_parameter_log2fold_change_TH_LNv	sub_junction_chr	sub_junction_start_coor	sub_junction_end_coor	sub_junction_length	sub_junction_strand	raw_count.IndexA	raw_count.IndexB	raw_count.IndexC	raw_count.IndexD	percentage_usage.IndexA	percentage_usage.IndexB	percentage_usage.IndexC	percentage_usage.IndexD	deltaPSI
CG10804	3_Junction_100329_Junction_100336	3_Junction_100329_Junction_100336	J001	0.0615334	7.02533	0.00803649	0.0913277	4.88417	5.74889	0.235169	chrX	3375377	3376057	681	-	109	345	95	108	0.872	0.8869	0.7787	0.6506	0.1648
CG10804	3_Junction_100329_Junction_100336	3_Junction_100329_Junction_100336	J002	0.0810507	5.5904	0.0180592	0.157707	3.3582	2.45384	-0.452649	chrX	3375402	3376057	656	-	16	44	27	58	0.128	0.1131	0.2213	0.3494	-0.1648
Fas2	3_Junction_101014_Junction_101021	3_Junction_101014_Junction_101021	J001	0.0628179	10.359	0.00128846	0.0247794	5.60969	4.51183	-0.314209	chrX	4030803	4035802	5000	-	35	118	235	225	0.625	0.5488	0.7993	0.8687	-0.2471
Fas2	3_Junction_101014_Junction_101021	3_Junction_101014_Junction_101021	J002	0.0752121	8.91528	0.00282795	0.0453317	2.87309	4.00439	0.478975	chrX	4033350	4035802	2453	-	21	97	59	34	0.375	0.4512	0.2007	0.1313	0.2471
elav	3_Junction_101088_Junction_101100	3_Junction_101088_Junction_101100	J001	0.103677	4.43765	0.0351546	0.23413	3.53124	4.5218	0.356722	chrX	413275	417017	3743	-	23	148	69	74	0.561	0.7437	0.4662	0.3627	0.2379
elav	3_Junction_101088_Junction_101100	3_Junction_101088_Junction_101100	J002	0.106276	4.33567	0.0373217	0.242432	4.13806	3.16752	-0.3856	chrX	415729	417017	1289	-	18	51	79	130	0.439	0.2563	0.5338	0.6373	-0.2379
Sxl	3_Junction_105087_Junction_105088	3_Junction_105087_Junction_105088	J001	0.194164	7.75308	0.00536211	0.0711467	6.54449	5.09312	-0.361731	chrX	6979987	6981645	1659	-	34	208	370	271	0.5763	0.7172	0.8747	0.961	-0.2711
Sxl	3_Junction_105087_Junction_105088	3_Junction_105087_Junction_105088	J002	0.224521	6.82687	0.00897966	0.0987215	2.54193	3.73057	0.553472	chrX	6980011	6981645	1635	-	25	82	53	11	0.4237	0.2828	0.1253	0.039	0.2711
CR44357	3_Junction_105177_Junction_105212	3_Junction_105177_Junction_105212	J001	0.352271	7.33648	0.0067569	0.081699	3.69748	6.71596	0.861053	chrX	7030527	7092488	61962	-	420	23	85	24	0.3341	0.0924	0.0331	0.0102	0.1916
CR44357	3_Junction_105177_Junction_105212	3_Junction_105177_Junction_105212	J002	0.337274	7.65744	0.00565386	0.0733822	12.3747	8.64833	-0.516897	chrX	7069550	7092488	22939	-	837	226	2486	2324	0.6659	0.9076	0.9669	0.9898	-0.1916
wun	3_Junction_29134_Junction_29135	3_Junction_29134_Junction_29135	J001	0.11289	4.44686	0.0349655	0.233325	4.56738	5.36807	0.233036	chr2R	5288653	5289912	1260	-	107	212	139	48	0.8106	0.8724	0.7316	0.5393	0.20605
wun	3_Junction_29134_Junction_29135	3_Junction_29134_Junction_29135	J002	0.134101	3.83396	0.0502241	0.286073	3.34036	2.60415	-0.359189	chr2R	5289739	5289912	174	-	25	31	51	41	0.1894	0.1276	0.2684	0.4607	-0.20605
Sin3A	3_Junction_33253_Junction_33257	3_Junction_33253_Junction_33257	J001	0.0362575	12.2074	0.000476004	0.0112962	4.57388	3.60964	-0.341561	chr2R	8464498	8466632	2135	-	32	54	126	143	0.3596	0.3273	0.6528	0.572	-0.26895
Sin3A	3_Junction_33253_Junction_33257	3_Junction_33253_Junction_33257	J002	0.0360172	12.2671	0.000461018	0.0111086	3.79541	4.75765	0.325996	chr2R	8466056	8466632	577	-	57	111	67	107	0.6404	0.6727	0.3472	0.428	0.26895
CG42321	3_Junction_33979_Junction_33980_Junction_33982	3_Junction_33979_Junction_33980_Junction_33982	J001	0.0252461	5.32122	0.0210673	0.171887	5.86118	5.30089	-0.144956	chr2R	9303462	9306490	3029	-	53	186	235	262	0.4907	0.4882	0.6695	0.6009	-0.14575
CG42321	3_Junction_33979_Junction_33980_Junction_33982	3_Junction_33979_Junction_33980_Junction_33982	J002	0.0411327	4.80363	0.0283998	0.20696	4.05826	4.96519	0.290988	chr2R	9304111	9306490	2380	-	37	171	84	114	0.3426	0.4488	0.2393	0.2615	0.1453
CG42321	3_Junction_33979_Junction_33980_Junction_33982	3_Junction_33979_Junction_33980_Junction_33982	J003	0.175895	0.0289846	0.864815	0.956942	2.87964	2.61622	-0.138408	chr2R	9305333	9306490	1158	-	18	24	32	60	0.1667	0.063	0.0912	0.1376	0.00045
CG13937	3_Junction_41931_Junction_41938	3_Junction_41931_Junction_41938	J001	0.1309	4.37845	0.0363961	0.239359	4.78307	4.02735	-0.248107	chr3L	1878039	1881127	3089	-	16	163	128	89	0.4324	0.6849	0.8	0.8396	-0.26115
CG13937	3_Junction_41931_Junction_41938	3_Junction_41931_Junction_41938	J002	0.150484	3.93769	0.0472154	0.27582	2.4931	3.18237	0.35216	chr3L	1878559	1881127	2569	-	21	75	32	17	0.5676	0.3151	0.2	0.1604	0.26115
Ank2	3_Junction_50800_Junction_50813	3_Junction_50800_Junction_50813	J001	0.0187118	9.29313	0.00230015	0.0392228	5.48572	6.04269	0.139511	chr3L	7656424	7689742	33319	-	84	185	208	298	0.866	0.881	0.7509	0.7544	0.12085
Ank2	3_Junction_50800_Junction_50813	3_Junction_50800_Junction_50813	J002	0.0266948	7.56698	0.00594474	0.0755816	3.46431	2.67936	-0.370681	chr3L	7686955	7689742	2788	-	13	25	69	97	0.134	0.119	0.2491	0.2456	-0.12085
CG40178	3_Junction_53817_Junction_53818	3_Junction_53817_Junction_53818	J001	0.149186	6.74562	0.0093978	0.101646	2.15145	1.03179	-1.06016	chr3LHet	1344239	1360664	16426	-	1	3	11	70	0.0208	0.0183	0.0866	0.1532	-0.10035
CG40178	3_Junction_53817_Junction_53818	3_Junction_53817_Junction_53818	J002	0.0905289	9.23915	0.00236895	0.040047	4.85416	5.98216	0.301444	chr3LHet	1352326	1360664	8339	-	47	161	116	387	0.9792	0.9817	0.9134	0.8468	0.10035
CG12163	3_Junction_54825_Junction_54837	3_Junction_54825_Junction_54837	J001	0.0671628	20.6627	5.47733e-06	0.000304882	8.71561	7.1582	-0.284005	chr3R	1065341	1077144	11804	-	37	412	1499	740	0.74	0.8692	0.9721	0.9699	-0.1664
CG12163	3_Junction_54825_Junction_54837	3_Junction_54825_Junction_54837	J002	0.0978771	15.6296	7.70411e-05	0.00267717	2.15576	3.70768	0.782319	chr3R	1069976	1077144	7169	-	13	62	43	23	0.26	0.1308	0.0279	0.0301	0.1664
mtd	3_Junction_55539_Junction_55649_Junction_55690	3_Junction_55539_Junction_55649_Junction_55690	J001	0.111088	12.6824	0.000369114	0.00935978	2.5827	1.26327	-1.03172	chr3R	1125295	1175188	49894	-	4	6	41	26	0.0455	0.0185	0.2092	0.1595	-0.15235
mtd	3_Junction_55539_Junction_55649_Junction_55690	3_Junction_55539_Junction_55649_Junction_55690	J002	0.218508	0.38533	0.534765	0.818343	3.21834	3.69045	0.19748	chr3R	1160782	1175188	14407	-	13	101	42	69	0.1477	0.3108	0.2143	0.4233	-0.08955
mtd	3_Junction_55539_Junction_55649_Junction_55690	3_Junction_55539_Junction_55649_Junction_55690	J003	0.114739	4.0881	0.0431861	0.261971	4.0348	5.57322	0.466013	chr3R	1162357	1175188	12832	-	71	218	113	68	0.8068	0.6708	0.5765	0.4172	0.24195
Jupiter	3_Junction_75179_Junction_75182	3_Junction_75179_Junction_75182	J001	0.0757143	4.79932	0.0284709	0.207368	4.82064	5.60659	0.217899	chr3R	7429961	7430306	346	-	43	173	201	191	0.6515	0.4626	0.3448	0.3051	0.2321
Jupiter	3_Junction_75179_Junction_75182	3_Junction_75179_Junction_75182	J002	0.0721505	4.9882	0.0255208	0.19477	6.34775	5.5621	-0.190617	chr3R	7430005	7430306	302	-	23	201	382	435	0.3485	0.5374	0.6552	0.6949	-0.2321
corto	3_Junction_76277_Junction_76568	3_Junction_76277_Junction_76568	J001	0.0733044	3.9918	0.0457222	0.271145	2.18478	1.54651	-0.498473	chr3R	863607	907269	43663	-	9	4	17	36	0.1607	0.1481	0.3617	0.3273	-0.1901
corto	3_Junction_76277_Junction_76568	3_Junction_76277_Junction_76568	J002	0.0503357	4.83741	0.0278488	0.204359	2.98522	3.49222	0.226308	chr3R	906841	907269	429	-	47	23	30	74	0.8393	0.8519	0.6383	0.6727	0.1901
NONE	3_Junction_80891_Junction_80939	3_Junction_80891_Junction_80939	J001	0.0781871	10.3529	0.00129273	0.0248266	2.78578	1.80756	-0.624033	chrM	12848	15679	2832	-	29	12	19	17	0.3222	0.3636	0.7917	0.7083	-0.4071
NONE	3_Junction_80891_Junction_80939	3_Junction_80891_Junction_80939	J002	0.0687674	11.1033	0.000861722	0.0182193	1.64898	2.56007	0.634611	chrM	13120	15679	2560	-	61	21	5	7	0.6778	0.6364	0.2083	0.2917	0.4071
mmd	3_Junction_90287_Junction_90291	3_Junction_90287_Junction_90291	J001	0.115974	11.6527	0.000641101	0.0142741	4.68987	3.30226	-0.506094	chrX	15843909	15845181	1273	-	25	78	105	103	0.5	0.4239	0.7836	0.8957	-0.3777
mmd	3_Junction_90287_Junction_90291	3_Junction_90287_Junction_90291	J002	0.128159	10.7208	0.00105935	0.0211454	2.30002	3.6189	0.653906	chrX	15844418	15845181	764	-	25	106	29	12	0.5	0.5761	0.2164	0.1043	0.3777
AstA-R1	5_Junction_100416_Junction_100417	5_Junction_100416_Junction_100417	J001	0.203996	6.19036	0.0128448	0.126172	2.51225	1.29644	-0.954428	chrX	3521774	3533249	11476	+	6	7	29	21	0.0545	0.1795	0.4394	0.3818	-0.2936
AstA-R1	5_Junction_100416_Junction_100417	5_Junction_100416_Junction_100417	J002	0.146833	8.08288	0.00446855	0.0630802	2.94599	4.19162	0.508754	chrX	3521774	3537524	15751	+	104	32	37	34	0.9455	0.8205	0.5606	0.6182	0.2936
tutl	5_Junction_10916_Junction_10917	5_Junction_10916_Junction_10917	J001	0.126811	5.57708	0.018197	0.158204	3.28498	2.45148	-0.422235	chr2L	4318708	4318905	198	+	11	38	35	66	0.5	0.4578	0.7	0.8571	-0.29965
tutl	5_Junction_10916_Junction_10917	5_Junction_10916_Junction_10917	J002	0.143867	5.05674	0.0245303	0.190422	1.75813	2.58687	0.557162	chr2L	4318708	4318946	239	+	11	45	15	11	0.5	0.5422	0.3	0.1429	0.29965
CG8920	5_Junction_21100_Junction_21102	5_Junction_21100_Junction_21102	J001	0.0310243	26.6036	2.49784e-07	2.12441e-05	3.33771	4.4276	0.407669	chr2R	16211916	16212001	86	+	87	144	39	38	0.8447	0.8421	0.5132	0.4578	0.3579
CG8920	5_Junction_21100_Junction_21102	5_Junction_21100_Junction_21102	J002	0.0420106	22.159	2.50977e-06	0.000152739	3.4264	2.07161	-0.725941	chr2R	16211916	16212351	436	+	16	27	37	45	0.1553	0.1579	0.4868	0.5422	-0.3579
MESK2	5_Junction_22212_Junction_22214_Junction_22216	5_Junction_22212_Junction_22214_Junction_22216	J001	0.168174	4.28653	0.0384155	0.245806	7.83786	6.6302	-0.241406	chr2R	17399682	17401020	1339	+	37	614	466	440	0.4512	0.6674	0.7516	0.88	-0.2565
MESK2	5_Junction_22212_Junction_22214_Junction_22216	5_Junction_22212_Junction_22214_Junction_22216	J002	0.407482	3.11634	0.0775107	0.359438	2.9578	3.91542	0.404646	chr2R	17399682	17401712	2031	+	35	113	58	14	0.4268	0.1228	0.0935	0.028	0.21405
MESK2	5_Junction_22212_Junction_22214_Junction_22216	5_Junction_22212_Junction_22214_Junction_22216	J003	0.102932	0.654072	0.418661	0.746837	3.96491	4.26965	0.10683	chr2R	17399682	17403391	3710	+	10	193	96	46	0.122	0.2098	0.1548	0.092	0.0425
Nplp1	5_Junction_25342_Junction_25345	5_Junction_25342_Junction_25345	J001	0.0537967	11.8326	0.00058204	0.0131951	3.73755	4.90714	0.392789	chr2R	20925053	20925223	171	+	15	187	111	59	0.4688	0.3175	0.15	0.1237	0.2563
Nplp1	5_Junction_25342_Junction_25345	5_Junction_25342_Junction_25345	J002	0.0436637	13.6937	0.000215179	0.00620304	7.45456	6.3698	-0.226874	chr2R	20925053	20926572	1520	+	17	402	629	418	0.5312	0.6825	0.85	0.8763	-0.2563
Ggamma1	5_Junction_28527_Junction_28529	5_Junction_28527_Junction_28529	J001	0.0756265	23.7191	1.11473e-06	7.44585e-05	7.07173	4.79503	-0.560524	chr2R	4789027	4789640	614	+	42	111	427	589	0.1634	0.1119	0.4636	0.6085	-0.3984
Ggamma1	5_Junction_28527_Junction_28529	5_Junction_28527_Junction_28529	J002	0.0734175	24.3952	7.84649e-07	5.65484e-05	6.75933	9.1655	0.439333	chr2R	4789027	4789831	805	+	215	881	494	379	0.8366	0.8881	0.5364	0.3915	0.3984
Dh44-R2	5_Junction_33056_Junction_33058	5_Junction_33056_Junction_33058	J001	0.10351	51.1589	8.51854e-13	2.4818e-10	1.59102	3.72803	1.22846	chr2R	8373543	8373763	221	+	108	74	6	6	0.9558	0.8916	0.1395	0.15	0.77895
Dh44-R2	5_Junction_33056_Junction_33058	5_Junction_33056_Junction_33058	J002	0.144233	40.357	2.11545e-10	3.81143e-08	3.65328	1.04235	-1.80935	chr2R	8373543	8374312	770	+	5	9	37	34	0.0442	0.1084	0.8605	0.85	-0.77895
Galphaq	5_Junction_33326_Junction_33327	5_Junction_33326_Junction_33327	J001	0.315721	8.29985	0.00396483	0.0573288	2.30206	4.29182	0.898666	chr2R	8505645	8505707	63	+	147	73	18	10	0.7696	0.5069	0.2278	0.0662	0.49125
Galphaq	5_Junction_33326_Junction_33327	5_Junction_33326_Junction_33327	J002	0.31808	8.24204	0.0040931	0.058811	5.34956	3.01678	-0.826413	chr2R	8505645	8505946	302	+	44	71	61	141	0.2304	0.4931	0.7722	0.9338	-0.49125
Aplip1	5_Junction_36896_Junction_36897	5_Junction_36896_Junction_36897	J001	0.216072	7.28224	0.00696396	0.0830249	6.45801	5.03366	-0.359482	chr3L	1197313	1197507	195	+	15	307	225	264	0.4054	0.7433	0.8929	0.9296	-0.3369
Aplip1	5_Junction_36896_Junction_36897	5_Junction_36896_Junction_36897	J002	0.246908	6.48329	0.0108893	0.11296	2.43742	3.55867	0.545981	chr3L	1197313	1197528	216	+	22	106	27	20	0.5946	0.2567	0.1071	0.0704	0.3369
Nc73EF	5_Junction_40668_Junction_40669	5_Junction_40668_Junction_40669	J001	0.0427207	7.963	0.00477433	0.0654694	5.26789	4.37069	-0.269367	chr3L	16958078	16959166	1089	+	28	177	186	92	0.4746	0.3969	0.62	0.7023	-0.2254
Nc73EF	5_Junction_40668_Junction_40669	5_Junction_40668_Junction_40669	J002	0.0430368	7.9155	0.00490131	0.0668463	4.14547	5.04042	0.28201	chr3L	16958078	16960480	2403	+	31	269	114	39	0.5254	0.6031	0.38	0.2977	0.2254
CG42676	5_Junction_41399_Junction_41400	5_Junction_41399_Junction_41400	J001	0.160968	7.81598	0.00517862	0.0693844	1.71451	0.797738	-1.10381	chr3L	1803567	1803793	227	+	1	2	10	29	0.0909	0.0769	0.4167	0.5179	-0.3834
CG42676	5_Junction_41399_Junction_41400	5_Junction_41399_Junction_41400	J002	0.124135	9.00847	0.00268731	0.0438376	1.76387	2.56796	0.541882	chr3L	1803567	1805008	1442	+	10	24	14	27	0.9091	0.9231	0.5833	0.4821	0.3834
Shab	5_Junction_46615_Junction_46618	5_Junction_46615_Junction_46618	J001	0.137808	26.232	3.02769e-07	2.49748e-05	1.42369	3.42405	1.26607	chr3L	2941624	2944021	2398	+	15	141	9	3	0.5769	0.7382	0.0978	0.0429	0.5872
Shab	5_Junction_46615_Junction_46618	5_Junction_46615_Junction_46618	J002	0.133001	26.9645	2.0723e-07	1.80739e-05	4.53379	2.29518	-0.98211	chr3L	2941624	2947875	6252	+	11	50	83	67	0.4231	0.2618	0.9022	0.9571	-0.5872
sif	5_Junction_48745_Junction_48747	5_Junction_48745_Junction_48747	J001	0.295535	3.84709	0.0498325	0.284909	1.19692	2.14586	0.842223	chr3L	5662182	5663950	1769	+	40	19	2	4	0.3008	0.1067	0.0227	0.0563	0.16425
sif	5_Junction_48745_Junction_48747	5_Junction_48745_Junction_48747	J002	0.241764	4.50695	0.0337574	0.229119	5.28346	3.8699	-0.449185	chr3L	5662182	5665153	2972	+	93	159	86	67	0.6992	0.8933	0.9773	0.9437	-0.16425
PVRAP	5_Junction_49163_Junction_49164	5_Junction_49163_Junction_49164	J001	0.0914314	7.31432	0.00684071	0.0822387	5.49507	4.11424	-0.417512	chr3L	6011250	6012168	919	+	12	35	301	842	0.2927	0.2011	0.4453	0.6093	-0.2804
PVRAP	5_Junction_49163_Junction_49164	5_Junction_49163_Junction_49164	J002	0.0917417	7.29205	0.00692602	0.0829656	5.07803	6.56881	0.371363	chr3L	6011250	6013158	1909	+	29	139	375	540	0.7073	0.7989	0.5547	0.3907	0.2804
CG8108	5_Junction_53484_Junction_53485	5_Junction_53484_Junction_53485	J001	0.0593651	8.58172	0.00339555	0.052031	4.04215	4.76967	0.238766	chr3L	9857902	9858156	255	+	24	94	110	200	0.96	0.94	0.7534	0.8163	0.16515
CG8108	5_Junction_53484_Junction_53485	5_Junction_53484_Junction_53485	J002	0.0962172	6.62096	0.0100786	0.107147	2.21135	1.33106	-0.732354	chr3L	9857902	9858178	277	+	1	6	36	45	0.04	0.06	0.2466	0.1837	-0.16515
cpo	5_Junction_57416_Junction_57418	5_Junction_57416_Junction_57418	J001	0.158482	14.529	0.000138017	0.00430492	0.739191	2.16601	1.55102	chr3R	13793550	13803076	9527	+	19	67	1	1	0.3958	0.25	0.0128	0.0323	0.30035
cpo	5_Junction_57416_Junction_57418	5_Junction_57416_Junction_57418	J002	0.117648	17.2209	3.32761e-05	0.00134807	4.83481	3.3109	-0.546234	chr3R	13793550	13832655	39106	+	29	201	77	30	0.6042	0.75	0.9872	0.9677	-0.30035
Nrx-1	5_Junction_62039_Junction_62040	5_Junction_62039_Junction_62040	J001	0.0454197	23.8014	1.06806e-06	7.25593e-05	3.3744	4.83515	0.51893	chr3R	18306848	18307562	715	+	36	317	50	24	0.6792	0.5601	0.2232	0.1983	0.4089
Nrx-1	5_Junction_62039_Junction_62040	5_Junction_62039_Junction_62040	J002	0.0439017	24.381	7.90428e-07	5.66666e-05	5.75515	4.28117	-0.426849	chr3R	18306848	18308567	1720	+	17	249	174	97	0.3208	0.4399	0.7768	0.8017	-0.4089
klg	5_Junction_62685_Junction_62686	5_Junction_62685_Junction_62686	J001	0.0811593	6.23455	0.0125282	0.12413	1.40111	2.09869	0.582923	chr3R	18741358	18762214	20857	+	16	19	8	7	0.5	0.4634	0.2051	0.1795	0.2894
klg	5_Junction_62685_Junction_62686	5_Junction_62685_Junction_62686	J002	0.0662043	6.95214	0.00837192	0.0939645	2.77956	2.16816	-0.358389	chr3R	18741358	18774397	33040	+	16	22	31	32	0.5	0.5366	0.7949	0.8205	-0.2894
CG31140	5_Junction_63660_Junction_63661	5_Junction_63660_Junction_63661	J001	0.0671313	18.4456	1.74825e-05	0.000817022	7.77154	5.86732	-0.405499	chr3R	19805344	19806248	905	+	42	360	359	626	0.5526	0.5106	0.8178	0.8968	-0.3257
CG31140	5_Junction_63660_Junction_63661	5_Junction_63660_Junction_63661	J002	0.072267	17.2624	3.25558e-05	0.00132675	3.89591	5.7197	0.55398	chr3R	19805344	19807446	2103	+	34	345	80	72	0.4474	0.4894	0.1822	0.1032	0.3257
slo	5_Junction_64638_Junction_64639	5_Junction_64638_Junction_64639	J001	0.260555	6.69105	0.00968982	0.104065	1.12716	2.05329	0.865245	chr3R	20521139	20521811	673	+	11	28	3	6	0.5789	0.7568	0.1	0.2857	0.475
slo	5_Junction_64638_Junction_64639	5_Junction_64638_Junction_64639	J002	0.252914	6.84378	0.00889504	0.0984639	2.40667	1.43192	-0.749093	chr3R	20521139	20525096	3958	+	8	9	27	15	0.4211	0.2432	0.9	0.7143	-0.475
Ef1alpha100E	5_Junction_70641_Junction_70642	5_Junction_70641_Junction_70642	J001	0.0430661	4.05172	0.0441263	0.266237	7.46287	6.80863	-0.132365	chr3R	27565586	27566037	452	+	47	199	882	1117	0.3561	0.4889	0.6037	0.565	-0.16185
Ef1alpha100E	5_Junction_70641_Junction_70642	5_Junction_70641_Junction_70642	J002	0.043646	4.00738	0.0453015	0.269945	6.68093	7.34124	0.135974	chr3R	27565586	27566040	455	+	85	208	579	860	0.6439	0.5111	0.3963	0.435	0.16185
CG31388	5_Junction_74841_Junction_74842	5_Junction_74841_Junction_74842	J001	0.173514	5.22676	0.0222419	0.178626	1.70666	0.863532	-0.982857	chr3R	7064331	7064531	201	+	1	5	11	12	0.0625	0.0342	0.1774	0.2308	-0.15575
CG31388	5_Junction_74841_Junction_74842	5_Junction_74841_Junction_74842	J002	0.0790054	8.59039	0.00337942	0.0519565	3.26556	3.86134	0.24177	chr3R	7064331	7064677	347	+	15	141	51	40	0.9375	0.9658	0.8226	0.7692	0.15575
NONE	5_Junction_78450_Junction_78452	5_Junction_78450_Junction_78452	J001	0.0755923	10.9667	0.000927645	0.0191587	4.93172	6.41541	0.37945	chr4	1284582	1284640	59	+	226	189	139	118	0.7661	0.6136	0.3861	0.3481	0.32275
NONE	5_Junction_78450_Junction_78452	5_Junction_78450_Junction_78452	J002	0.0772084	10.7562	0.00103933	0.0209288	6.04992	4.57119	-0.404346	chr4	1284582	1288727	4146	+	69	119	221	221	0.2339	0.3864	0.6139	0.6519	-0.32275
Tomosyn	5_Junction_84462_Junction_84464	5_Junction_84462_Junction_84464	J001	0.285911	7.774	0.00530036	0.0705341	1.16802	2.24872	0.94504	chrX	12534872	12537904	3033	+	15	28	7	3	0.5769	0.2478	0.0588	0.0448	0.36055
Tomosyn	5_Junction_84462_Junction_84464	5_Junction_84462_Junction_84464	J002	0.228032	9.26314	0.00233812	0.0397585	4.4377	3.05808	-0.537188	chrX	12534872	12542568	7697	+	11	85	112	64	0.4231	0.7522	0.9412	0.9552	-0.36055
CG6340	5_Junction_89420_Junction_89421	5_Junction_89420_Junction_89421	J001	0.252242	9.7662	0.00177749	0.0319832	2.2945	0.906598	-1.33964	chrX	15377453	15378561	1109	+	1	2	43	48	0.0417	0.0088	0.1509	0.3137	-0.20705
CG6340	5_Junction_89420_Junction_89421	5_Junction_89420_Junction_89421	J002	0.187756	12.3274	0.000446364	0.0108949	4.23643	6.20714	0.551081	chrX	15377453	15379153	1701	+	23	226	242	105	0.9583	0.9912	0.8491	0.6863	0.20705
l(1)G0196	5_Junction_96988_Junction_96989	5_Junction_96988_Junction_96989	J001	0.463998	3.72446	0.0536211	0.297501	2.30921	3.43353	0.572293	chrX	21905576	21906063	488	+	57	81	17	14	0.7808	0.2647	0.1298	0.112	0.40185
l(1)G0196	5_Junction_96988_Junction_96989	5_Junction_96988_Junction_96989	J002	0.438248	3.9291	0.0474574	0.276643	5.44215	3.96475	-0.456945	chrX	21905576	21906868	1293	+	16	225	114	111	0.2192	0.7353	0.8702	0.888	-0.40185
dnc	5_Junction_99876_Junction_99877	5_Junction_99876_Junction_99877	J001	0.131441	4.09205	0.0430854	0.261743	3.72355	2.90984	-0.355736	chrX	3150760	3152781	2022	+	30	16	125	38	0.5769	0.5	0.8621	0.7037	-0.24445
dnc	5_Junction_99876_Junction_99877	5_Junction_99876_Junction_99877	J002	0.157938	3.52774	0.0603501	0.318571	1.83082	2.62577	0.520252	chrX	3150760	3165225	14466	+	22	16	20	16	0.4231	0.5	0.1379	0.2963	0.24445

## Sheet: AS intron retention events
Gene	AS_event_ID	AS_structure_ID	sub_junction_ID	sub-junction_dispersion_estimate	LRT_statistic-full_vs_reduced	LRT_p_value-full_vs_reduced	BH_adjusted_p-values	LNv	TH	fitting_parameter_log2fold_change_TH_LNv	sub_junction_chr	sub_junction_start_coor	sub_junction_end_coor	sub_junction_length	sub_junction_strand	raw_count.IndexA	raw_count.IndexB	raw_count.IndexC	raw_count.IndexD	percentage_usage.IndexA	percentage_usage.IndexB	percentage_usage.IndexC	percentage_usage.IndexD	deltaPSI
l(1)G0334	intronretention_Junction_101951	intronretentionleft-Junction_101951	J001	0.020844	14.5799	0.00013434	0.00421908	6.82185	7.69837	0.17439	chrX	4596624	4596855	232	+	376	407	343	245	0.7705	0.8156	0.6328	0.5976
l(1)G0334	intronretention_Junction_101951	intronretentionleft-Junction_101951	J002	0.0232961	13.3314	0.000261003	0.00720547	5.74377	4.77639	-0.266075	chrX	4596576	4596672	97	+	112	92	199	165	0.2295	0.1844	0.3672	0.4024
l(1)G0334	intronretention_Junction_101951	intronretentionright-Junction_101951	J001	0.204866	6.32593	0.0118985	0.120064	6.37849	8.19509	0.361546	chrX	4596624	4596855	232	+	376	407	343	245	0.9592	0.8444	0.6806	0.643
l(1)G0334	intronretention_Junction_101951	intronretentionright-Junction_101951	J002	0.223738	5.82658	0.0157857	0.144876	4.9274	3.40526	-0.533062	chrX	4596808	4596900	93	+	16	75	161	136	0.0408	0.1556	0.3194	0.357	0.122796
Pat1	intronretention_Junction_104173	intronretentionleft-Junction_104173	J001	0.0355051	10.7343	0.00105169	0.0210936	2.42852	3.37433	0.474522	chrX	6489993	6490049	57	+	41	52	20	30	0.2867	0.2938	0.1064	0.137
Pat1	intronretention_Junction_104173	intronretentionleft-Junction_104173	J002	0.0248431	13.377	0.000254725	0.00708932	5.65169	4.93861	-0.194578	chrX	6489947	6490041	95	+	102	125	168	189	0.7133	0.7062	0.8936	0.863
Pat1	intronretention_Junction_104173	intronretentionright-Junction_104173	J001	0.0296946	11.7373	0.000612588	0.0137963	2.42956	3.37015	0.47212	chrX	6489993	6490049	57	+	41	52	20	30	0.313	0.3041	0.1258	0.1382
Pat1	intronretention_Junction_104173	intronretentionright-Junction_104173	J002	0.0213911	14.1723	0.000166809	0.00503108	5.45352	4.7572	-0.197076	chrX	6490002	6490098	97	+	90	119	139	187	0.687	0.6959	0.8742	0.8618	0.233265
frj	intronretention_Junction_12532	intronretentionleft-Junction_12532	J001	0.0311738	7.18431	0.00735437	0.0859035	5.3134	4.59961	-0.208124	chr2L	6457916	6458085	170	+	30	120	210	218	0.3261	0.427	0.5722	0.5752
frj	intronretention_Junction_12532	intronretentionleft-Junction_12532	J002	0.0312174	7.17714	0.00738385	0.0860388	4.72619	5.442	0.203458	chr2L	6457868	6457964	97	+	62	161	157	161	0.6739	0.573	0.4278	0.4248
frj	intronretention_Junction_12532	intronretentionright-Junction_12532	J001	0.109652	4.55231	0.0328743	0.225299	5.41405	4.4689	-0.276789	chr2L	6457916	6458085	170	+	30	120	210	218	0.3261	0.5505	0.7216	0.6708
frj	intronretention_Junction_12532	intronretentionright-Junction_12532	J002	0.114578	4.38107	0.0363402	0.239349	3.86199	4.78978	0.310614	chr2L	6458038	6458126	89	+	62	98	81	107	0.6739	0.4495	0.2784	0.3292	-0.183957
CG4495	intronretention_Junction_13122	intronretentionleft-Junction_13122	J001	0.089288	11.0703	0.000877213	0.0183946	4.7046	3.73914	-0.331368	chr2L	7184203	7184613	411	+	15	94	150	126	0.6	0.7344	0.9036	0.9474
CG4495	intronretention_Junction_13122	intronretentionleft-Junction_13122	J002	0.133518	8.47639	0.00359785	0.053666	1.51972	2.54545	0.744113	chr2L	7184155	7184251	97	+	10	34	16	7	0.4	0.2656	0.0964	0.0526
CG4495	intronretention_Junction_13122	intronretentionright-Junction_13122	J001	0.0902168	4.98646	0.0255464	0.19477	4.55253	3.87155	-0.233757	chr2L	7184203	7184613	411	+	15	94	150	126	0.5556	0.752	0.8824	0.8514
CG4495	intronretention_Junction_13122	intronretentionright-Junction_13122	J002	0.124613	4.01535	0.0450878	0.269679	1.94059	2.64536	0.446972	chr2L	7184566	7184661	96	+	12	31	20	22	0.4444	0.248	0.1176	0.1486	-0.162747
galectin	intronretention_Junction_13349	intronretentionleft-Junction_13349	J001	0.0349412	9.61774	0.00192707	0.0341363	4.05716	3.37418	-0.265933	chr2L	74572	74901	330	+	33	26	109	130	0.569	0.5098	0.7956	0.7647
galectin	intronretention_Junction_13349	intronretentionleft-Junction_13349	J002	0.0451722	8.28215	0.00400366	0.0577076	2.2973	3.1105	0.437209	chr2L	74525	74620	96	+	25	25	28	40	0.431	0.4902	0.2044	0.2353
galectin	intronretention_Junction_13349	intronretentionright-Junction_13349	J001	0.177788	7.61756	0.00578028	0.0741099	4.32679	3.20669	-0.432213	chr2L	74572	74901	330	+	33	26	109	130	0.7857	0.5098	0.9397	0.9155
galectin	intronretention_Junction_13349	intronretentionright-Junction_13349	J002	0.239005	5.9362	0.014833	0.139115	1.33438	2.32403	0.800462	chr2L	74854	74950	97	+	9	25	7	12	0.2143	0.4902	0.0603	0.0845	-0.176123
aPKC	intronretention_Junction_16468	intronretentionleft-Junction_16468	J001	0.17233	5.72921	0.016685	0.150011	4.70497	5.99899	0.350533	chr2R	10833595	10833653	59	-	110	181	112	190	0.9402	0.7974	0.6188	0.6032
aPKC	intronretention_Junction_16468	intronretentionleft-Junction_16468	J002	0.19334	5.19642	0.0226335	0.180817	3.90952	2.787	-0.488282	chr2R	10833547	10833643	97	-	7	46	69	125	0.0598	0.2026	0.3812	0.3968
aPKC	intronretention_Junction_16468	intronretentionright-Junction_16468	J001	0.0201456	15.4563	8.44363e-05	0.00286895	4.9318	5.74467	0.220111	chr2R	10833595	10833653	59	-	110	181	112	190	0.7971	0.8044	0.5714	0.6149
aPKC	intronretention_Junction_16468	intronretentionright-Junction_16468	J002	0.0243587	13.6832	0.000216377	0.00621142	4.19985	3.22406	-0.38146	chr2R	10833606	10833702	97	-	28	44	84	119	0.2029	0.1956	0.4286	0.3851	0.169719
CG10737	intronretention_Junction_20365	intronretentionleft-Junction_20365	J001	0.0931924	6.93947	0.0084314	0.0944	1.94712	2.79105	0.519461	chr2R	15062813	15063691	879	+	27	32	15	17	0.6429	0.5517	0.2174	0.3333
CG10737	intronretention_Junction_20365	intronretentionleft-Junction_20365	J002	0.0877474	7.2359	0.007146	0.0844993	3.14398	2.3106	-0.444327	chr2R	15062766	15062861	96	+	15	26	54	34	0.3571	0.4483	0.7826	0.6667
CG10737	intronretention_Junction_20365	intronretentionright-Junction_20365	J001	0.106685	6.67411	0.00978234	0.10473	1.98687	2.7397	0.46352	chr2R	15062813	15063691	879	+	27	32	15	17	0.8182	0.6809	0.4412	0.3617
CG10737	intronretention_Junction_20365	intronretentionright-Junction_20365	J002	0.123078	6.07331	0.0137239	0.131299	2.42339	1.62114	-0.580016	chr2R	15063644	15063740	97	+	6	15	19	30	0.1818	0.3191	0.5588	0.6383	0.318288
CG9945	intronretention_Junction_21356	intronretentionleft-Junction_21356	J001	0.2918	5.45724	0.0194874	0.164615	0.877822	1.7779	1.01817	chr2R	16508255	16508320	66	+	13	25	1	3	0.2131	0.0883	0.0079	0.0306
CG9945	intronretention_Junction_21356	intronretentionleft-Junction_21356	J002	0.193799	7.20582	0.00726677	0.0857053	5.58896	4.3582	-0.358847	chr2R	16508207	16508303	97	+	48	258	126	95	0.7869	0.9117	0.9921	0.9694
CG9945	intronretention_Junction_21356	intronretentionright-Junction_21356	J001	0.227947	5.81934	0.0158509	0.145084	0.790134	1.96944	1.31762	chr2R	16508255	16508320	66	+	13	25	1	3	0.1008	0.105	0.0045	0.0353
CG9945	intronretention_Junction_21356	intronretentionright-Junction_21356	J002	0.066063	12.5355	0.000399298	0.00992302	5.84513	5.14033	-0.185375	chr2R	16508273	16508369	97	+	116	213	221	82	0.8992	0.895	0.9955	0.9647	0.219329
Zir	intronretention_Junction_235	intronretentionleft-Junction_235	J001	0.039939	8.9136	0.00283054	0.0453317	7.37107	6.36824	-0.21098	chr2L	101619	101874	256	+	269	322	287	281	0.4432	0.4005	0.6916	0.5854
Zir	intronretention_Junction_235	intronretentionleft-Junction_235	J002	0.0398318	8.93541	0.00279695	0.0450572	6.07531	7.06807	0.218357	chr2L	101571	101667	97	+	338	482	128	199	0.5568	0.5995	0.3084	0.4146
Zir	intronretention_Junction_235	intronretentionright-Junction_235	J001	0.02751	24.4569	7.59924e-07	5.59443e-05	7.43049	6.30797	-0.236282	chr2L	101619	101874	256	+	269	322	287	281	0.7889	0.7471	0.9441	0.9243
Zir	intronretention_Junction_235	intronretentionright-Junction_235	J002	0.0368651	19.9752	7.84549e-06	0.000414781	2.54037	3.9079	0.621353	chr2L	101827	101921	95	+	72	109	17	23	0.2111	0.2529	0.0559	0.0757	-0.185037
CG12825	intronretention_Junction_27144	intronretentionleft-Junction_27144	J001	0.206324	13.659	0.000219185	0.00626575	1.15596	2.28483	0.982988	chr2R	3676863	3676924	62	+	41	40	3	2	0.82	0.8889	0.375	0.1
CG12825	intronretention_Junction_27144	intronretentionleft-Junction_27144	J002	0.283094	10.8955	0.000963976	0.0197601	2.38468	0.988822	-1.27001	chr2R	3676816	3676911	96	+	9	5	5	18	0.18	0.1111	0.625	0.9
CG12825	intronretention_Junction_27144	intronretentionright-Junction_27144	J001	0.150945	17.0211	3.69672e-05	0.00146722	1.16902	2.25606	0.948508	chr2R	3676863	3676924	62	+	41	40	3	2	0.8367	0.8889	0.3333	0.1176
CG12825	intronretention_Junction_27144	intronretentionright-Junction_27144	J002	0.224475	13.2395	0.000274113	0.00743252	2.31916	0.932119	-1.31502	chr2R	3676877	3676970	94	+	8	5	6	15	0.1633	0.1111	0.6667	0.8824	0.557501
Cul1	intronretention_Junction_27270	intronretentionleft-Junction_27270	J001	0.104095	2.85321	0.0911915	0.388974	1.73378	1.15429	-0.586911	chr2R	3808449	3808507	59	+	5	5	11	13	0.0467	0.0352	0.0965	0.1102
Cul1	intronretention_Junction_27270	intronretentionleft-Junction_27270	J002	0.0435215	4.43952	0.0351161	0.233988	4.62455	4.98024	0.106901	chr2R	3808426	3808497	72	+	102	137	103	105	0.9533	0.9648	0.9035	0.8898
Cul1	intronretention_Junction_27270	intronretentionright-Junction_27270	J001	0.152006	1.95982	0.161533	0.514462	1.72225	1.16646	-0.562152	chr2R	3808449	3808507	59	+	5	5	11	13	0.0289	0.0115	0.046	0.0436
Cul1	intronretention_Junction_27270	intronretentionright-Junction_27270	J002	0.0493205	3.95554	0.0467173	0.274355	6.46369	6.80364	0.0739495	chr2R	3808460	3808556	97	+	168	428	228	285	0.9711	0.9885	0.954	0.9564	-0.10858
CG42732	intronretention_Junction_30776	intronretentionleft-Junction_30776	J001	0.0737223	11.2983	0.000775784	0.0168082	2.46132	3.62674	0.559241	chr2R	6211823	6212693	871	-	21	163	18	18	0.5526	0.6653	0.2143	0.3103
CG42732	intronretention_Junction_30776	intronretentionleft-Junction_30776	J002	0.0754163	11.0979	0.00086424	0.0182343	4.02184	2.80119	-0.521817	chr2R	6211775	6211871	97	-	17	82	66	40	0.4474	0.3347	0.7857	0.6897
CG42732	intronretention_Junction_30776	intronretentionright-Junction_30776	J001	0.0968724	8.84876	0.00293288	0.0466433	2.56717	3.47751	0.437876	chr2R	6211823	6212693	871	-	21	163	18	18	0.75	0.8811	0.5294	0.4737
CG42732	intronretention_Junction_30776	intronretentionright-Junction_30776	J002	0.134877	6.81733	0.00902773	0.0989725	2.5617	1.52835	-0.745124	chr2R	6212646	6212741	96	-	7	22	16	20	0.25	0.1189	0.4706	0.5263	0.342129
Dh44-R2	intronretention_Junction_33056	intronretentionleft-Junction_33056	J001	0.117617	7.66611	0.00562678	0.0731695	2.06722	2.9277	0.502075	chr2R	8373543	8373763	221	+	108	74	6	6	0.7013	0.8222	0.2857	0.4615
Dh44-R2	intronretention_Junction_33056	intronretentionleft-Junction_33056	J002	0.141743	6.78019	0.00921753	0.10049	2.76692	1.80811	-0.613796	chr2R	8373495	8373591	97	+	46	16	15	7	0.2987	0.1778	0.7143	0.5385
Dh44-R2	intronretention_Junction_33056	intronretentionright-Junction_33056	J001	0.23228	4.70676	0.0300442	0.214086	2.12966	2.85271	0.421709	chr2R	8373543	8373763	221	+	108	74	6	6	0.75	0.925	0.4615	0.5
Dh44-R2	intronretention_Junction_33056	intronretentionright-Junction_33056	J002	0.279323	4.1457	0.0417404	0.257641	2.21567	1.4948	-0.567794	chr2R	8373716	8373809	94	+	36	6	7	6	0.25	0.075	0.5385	0.5	0.325422
CG6357	intronretention_Junction_34400	intronretentionleft-Junction_34400	J001	0.221813	15.2206	9.56557e-05	0.00321033	3.0723	5.16957	0.750725	chr2R	9728149	9728208	60	+	90	155	70	16	0.9091	0.847	0.4167	0.1798
CG6357	intronretention_Junction_34400	intronretentionleft-Junction_34400	J002	0.24002	14.1825	0.000165907	0.00501495	4.10721	2.19118	-0.906452	chr2R	9728104	9728197	94	+	9	28	98	73	0.0909	0.153	0.5833	0.8202
CG6357	intronretention_Junction_34400	intronretentionright-Junction_34400	J001	0.262296	18.7684	1.47589e-05	0.000701712	2.86283	5.48821	0.938895	chr2R	9728149	9728208	60	+	90	155	70	16	0.9474	0.9012	0.4118	0.1404
CG6357	intronretention_Junction_34400	intronretentionright-Junction_34400	J002	0.279921	17.7029	2.58227e-05	0.00110843	4.07822	1.83835	-1.14953	chr2R	9728161	9728257	97	+	5	17	100	98	0.0526	0.0988	0.5882	0.8596	0.488272
CG6357	intronretention_Junction_34402	intronretentionleft-Junction_34402	J001	0.491327	5.67272	0.0172308	0.152515	2.61221	4.53369	0.795415	chr2R	9728479	9728536	58	+	71	155	37	12	0.8659	0.9226	0.6607	0.1481
CG6357	intronretention_Junction_34402	intronretentionleft-Junction_34402	J002	0.540296	5.18069	0.0228393	0.182005	3.31602	1.69321	-0.969695	chr2R	9728434	9728527	94	+	11	13	19	69	0.1341	0.0774	0.3393	0.8519
CG6357	intronretention_Junction_34402	intronretentionright-Junction_34402	J001	0.305307	7.18444	0.00735384	0.0859035	2.76415	4.30874	0.64043	chr2R	9728479	9728536	58	+	71	155	37	12	0.8765	0.8424	0.5873	0.1905
CG6357	intronretention_Junction_34402	intronretentionright-Junction_34402	J002	0.343037	6.46036	0.0110307	0.114009	3.32366	1.9142	-0.796029	chr2R	9728489	9728584	96	+	10	29	26	51	0.1235	0.1576	0.4127	0.8095	0.417047
CG6357	intronretention_Junction_34405	intronretentionleft-Junction_34405	J001	0.187276	7.24225	0.00712076	0.0842737	5.13922	6.66692	0.375472	chr2R	9728822	9728884	63	+	374	349	123	59	0.8884	0.9357	0.7688	0.4958
CG6357	intronretention_Junction_34405	intronretentionleft-Junction_34405	J002	0.217738	6.29233	0.0121261	0.121638	3.91494	2.63114	-0.573304	chr2R	9728774	9728870	97	+	47	24	37	60	0.1116	0.0643	0.2312	0.5042
CG6357	intronretention_Junction_34405	intronretentionright-Junction_34405	J001	0.25806	15.9102	6.6419e-05	0.00239336	4.50772	7.43525	0.721983	chr2R	9728822	9728884	63	+	374	349	123	59	0.9868	0.9614	0.7546	0.4574
CG6357	intronretention_Junction_34405	intronretentionright-Junction_34405	J002	0.314659	13.2774	0.000268629	0.00737143	3.58306	1.48951	-1.26635	chr2R	9728837	9728924	88	+	5	14	40	70	0.0132	0.0386	0.2454	0.5426	0.18773
CG40498	intronretention_Junction_35374	intronretentionleft-Junction_35374	J001	0.0362277	17.096	3.55368e-05	0.00142699	10.6286	9.18678	-0.210323	chr2RHet	53841	53898	58	-	532	1024	1203	1507	0.5978	0.7009	0.8508	0.8611
CG40498	intronretention_Junction_35374	intronretentionleft-Junction_35374	J002	0.0377602	16.4415	5.01754e-05	0.00190319	6.23684	7.67123	0.298641	chr2RHet	53793	53889	97	-	358	437	211	243	0.4022	0.2991	0.1492	0.1389
CG40498	intronretention_Junction_35374	intronretentionright-Junction_35374	J001	0.143349	4.8862	0.0270722	0.202126	10.7433	9.07481	-0.243492	chr2RHet	53841	53898	58	-	532	1024	1203	1507	0.6296	0.8325	0.8924	0.9223
CG40498	intronretention_Junction_35374	intronretentionright-Junction_35374	J002	0.14978	4.68031	0.0305102	0.215873	5.25504	6.76376	0.364123	chr2RHet	53851	53947	97	-	313	206	145	127	0.3704	0.1675	0.1076	0.0777	-0.136189
GlcAT-P	intronretention_Junction_36406	intronretentionleft-Junction_36406	J001	0.653488	4.26071	0.0390037	0.247546	2.30496	0.923072	-1.32022	chr3L	11189975	11190253	279	-	3	9	12	13	0.0051	0.0608	0.1538	0.3333
GlcAT-P	intronretention_Junction_36406	intronretentionleft-Junction_36406	J002	0.481542	5.63103	0.0176453	0.155088	4.19258	6.59998	0.654623	chr3L	11189933	11190023	91	-	580	139	66	26	0.9949	0.9392	0.8462	0.6667
GlcAT-P	intronretention_Junction_36406	intronretentionright-Junction_36406	J001	0.248809	4.53156	0.0332752	0.227138	1.99169	1.08195	-0.880368	chr3L	11189975	11190253	279	-	3	9	12	13	0.0205	0.0698	0.1558	0.2407
GlcAT-P	intronretention_Junction_36406	intronretentionright-Junction_36406	J002	0.142812	6.76488	0.00929689	0.100928	3.88617	4.82297	0.311572	chr3L	11190206	11190301	96	-	143	120	65	41	0.9795	0.9302	0.8442	0.7593	-0.320889
CR44716	intronretention_Junction_36481	intronretentionleft-Junction_36481	J001	0.0751706	5.0474	0.024663	0.190797	2.03374	1.25534	-0.696053	chr3L	11243740	11243864	125	-	2	3	30	52	0.0741	0.12	0.3	0.2781
CR44716	intronretention_Junction_36481	intronretentionleft-Junction_36481	J002	0.0484707	6.05263	0.0138856	0.132222	3.11301	3.69307	0.246513	chr3L	11243695	11243788	94	-	25	22	70	135	0.9259	0.88	0.7	0.7219
CR44716	intronretention_Junction_36481	intronretentionright-Junction_36481	J001	0.109623	3.78951	0.0515749	0.290265	1.96531	1.30003	-0.596218	chr3L	11243740	11243864	125	-	2	3	30	52	0.25	0.1	0.4167	0.3537
CR44716	intronretention_Junction_36481	intronretentionright-Junction_36481	J002	0.0837844	4.42853	0.0353429	0.234813	2.49859	3.09235	0.307591	chr3L	11243817	11243913	97	-	6	27	42	95	0.75	0.9	0.5833	0.6463	-0.272234
CG5946	intronretention_Junction_36833	intronretentionleft-Junction_36833	J001	0.0880826	11.4583	0.000711739	0.0156434	9.62144	8.1117	-0.246247	chr3L	11810416	11810487	72	-	131	1188	965	665	0.5696	0.7519	0.896	0.9048
CG5946	intronretention_Junction_36833	intronretentionleft-Junction_36833	J002	0.0941473	10.771	0.00103103	0.0207922	4.60074	5.97916	0.378076	chr3L	11810368	11810464	97	-	99	392	112	70	0.4304	0.2481	0.104	0.0952
CG5946	intronretention_Junction_36833	intronretentionright-Junction_36833	J001	0.056178	10.194	0.001409	0.0267124	9.42265	8.30843	-0.181556	chr3L	11810416	11810487	72	-	131	1188	965	665	0.6859	0.8054	0.9053	0.9072
CG5946	intronretention_Junction_36833	intronretentionright-Junction_36833	J002	0.0627834	9.25642	0.00234672	0.0397691	4.31741	5.38082	0.31766	chr3L	11810440	11810536	97	-	60	287	101	68	0.3141	0.1946	0.0947	0.0928	-0.155504
CG9628	intronretention_Junction_38705	intronretentionleft-Junction_38705	J001	0.380434	11.438	0.000719562	0.0157396	1.75731	3.55139	1.01501	chr3L	14620595	14620654	60	+	255	112	5	1	0.9586	0.8819	0.5	0.0769
CG9628	intronretention_Junction_38705	intronretentionleft-Junction_38705	J002	0.537522	8.56961	0.0034182	0.0521218	2.8198	0.934153	-1.59386	chr3L	14620547	14620643	97	+	11	15	5	12	0.0414	0.1181	0.5	0.9231
CG9628	intronretention_Junction_38705	intronretentionright-Junction_38705	J001	0.0801079	63.1833	1.88342e-15	9.55172e-13	1.67295	3.67552	1.13555	chr3L	14620595	14620654	60	+	255	112	5	1	0.9551	0.9256	0.1724	0.0625
CG9628	intronretention_Junction_38705	intronretentionright-Junction_38705	J002	0.154606	41.4298	1.2218e-10	2.35635e-08	3.97972	0.896461	-2.15035	chr3L	14620607	14620703	97	+	12	9	24	15	0.0449	0.0744	0.8276	0.9375	0.553301
nSyb	intronretention_Junction_40029	intronretentionleft-Junction_40029	J001	0.0335094	27.6064	1.48682e-07	1.34828e-05	9.2124	7.61253	-0.275201	chr3L	1632454	1633056	603	-	89	363	1428	1668	0.6544	0.671	0.916	0.8784
nSyb	intronretention_Junction_40029	intronretentionleft-Junction_40029	J002	0.0379108	24.8575	6.17268e-07	4.6441e-05	4.36919	6.03734	0.466548	chr3L	1632406	1632502	97	-	47	178	131	231	0.3456	0.329	0.084	0.1216
nSyb	intronretention_Junction_40029	intronretentionright-Junction_40029	J001	0.12641	8.75313	0.00309071	0.0487047	9.18282	7.61526	-0.270044	chr3L	1632454	1633056	603	-	89	363	1428	1668	0.7479	0.8307	0.9681	0.9231
nSyb	intronretention_Junction_40029	intronretentionright-Junction_40029	J002	0.146644	7.64696	0.00568682	0.0734629	3.24036	4.56655	0.494951	chr3L	1633009	1633105	97	-	30	74	47	139	0.2521	0.1693	0.0319	0.0769	-0.148587
cyc	intronretention_Junction_42597	intronretentionleft-Junction_42597	J001	0.132895	7.19119	0.00732625	0.0858941	6.02276	4.86019	-0.309412	chr3L	19807350	19807405	56	-	30	262	234	147	0.5085	0.7529	0.8931	0.8963
cyc	intronretention_Junction_42597	intronretentionleft-Junction_42597	J002	0.15541	6.30952	0.0120091	0.120721	2.4326	3.42128	0.492038	chr3L	19807302	19807398	97	-	29	86	28	17	0.4915	0.2471	0.1069	0.1037
cyc	intronretention_Junction_42597	intronretentionright-Junction_42597	J001	0.140871	8.31213	0.00393813	0.0570633	6.03582	4.84751	-0.316307	chr3L	19807350	19807405	56	-	30	262	234	147	0.6522	0.8452	0.9435	0.9608
cyc	intronretention_Junction_42597	intronretentionright-Junction_42597	J002	0.185917	6.72427	0.00951099	0.102582	1.65884	2.61634	0.657372	chr3L	19807358	19807454	97	-	16	48	14	6	0.3478	0.1548	0.0565	0.0392	-0.177856
CG32432	intronretention_Junction_43654	intronretentionleft-Junction_43654	J001	0.272796	4.87667	0.0272221	0.202803	4.25592	5.9585	0.48548	chr3L	20837648	20839027	1380	-	110	898	64	12	0.3492	0.6168	0.2319	0.0745
CG32432	intronretention_Junction_43654	intronretentionleft-Junction_43654	J002	0.271946	4.891	0.0269971	0.201675	7.50453	5.59744	-0.422995	chr3L	20837601	20837696	96	-	205	558	212	149	0.6508	0.3832	0.7681	0.9255
CG32432	intronretention_Junction_43654	intronretentionright-Junction_43654	J001	0.322804	6.5372	0.0105642	0.110951	4.16888	6.06661	0.541232	chr3L	20837648	20839027	1380	-	110	898	64	12	0.7914	0.8186	0.5289	0.1348
CG32432	intronretention_Junction_43654	intronretentionright-Junction_43654	J002	0.344782	6.14283	0.0131946	0.12841	5.14929	3.33631	-0.626122	chr3L	20838980	20839076	97	-	29	199	57	77	0.2086	0.1814	0.4711	0.8652	0.382702
CG11455	intronretention_Junction_4783	intronretentionleft-Junction_4783	J001	0.123147	4.98647	0.0255463	0.19477	2.78684	3.51669	0.335586	chr2L	155429	155565	137	+	25	121	13	42	0.6579	0.4566	0.2063	0.3022
CG11455	intronretention_Junction_4783	intronretentionleft-Junction_4783	J002	0.116307	5.19727	0.0226224	0.180817	4.31222	3.54471	-0.282763	chr2L	155381	155477	97	+	13	144	50	97	0.3421	0.5434	0.7937	0.6978
CG11455	intronretention_Junction_4783	intronretentionright-Junction_4783	J001	0.197382	4.82835	0.0279955	0.204996	2.58163	3.76754	0.545339	chr2L	155429	155565	137	+	25	121	13	42	0.0988	0.1532	0.0168	0.0541
CG11455	intronretention_Junction_4783	intronretentionright-Junction_4783	J002	0.165012	5.67876	0.0171715	0.152374	9.17628	7.61466	-0.269129	chr2L	155518	155614	97	+	228	669	759	734	0.9012	0.8468	0.9832	0.9459	0.3072
CG1316	intronretention_Junction_47965	intronretentionleft-Junction_47965	J001	0.0234427	35.2052	2.9673e-09	4.06312e-07	6.83671	5.39962	-0.340443	chr3L	4285920	4286170	251	+	44	282	311	307	0.4681	0.5018	0.7954	0.8342
CG1316	intronretention_Junction_47965	intronretentionleft-Junction_47965	J002	0.0260908	32.5287	1.17445e-08	1.41067e-06	3.86731	5.43632	0.491299	chr3L	4285872	4285968	97	+	50	280	80	61	0.5319	0.4982	0.2046	0.1658
CG1316	intronretention_Junction_47965	intronretentionright-Junction_47965	J001	0.0562834	15.8875	6.72205e-05	0.00241486	6.85496	5.3447	-0.359037	chr3L	4285920	4286170	251	+	44	282	311	307	0.4731	0.4372	0.7283	0.8275
CG1316	intronretention_Junction_47965	intronretentionright-Junction_47965	J002	0.0585549	15.3446	8.95756e-05	0.00302854	4.32098	5.80662	0.426341	chr3L	4286123	4286219	97	+	49	363	116	64	0.5269	0.5628	0.2717	0.1725	-0.244871
nAChRbeta1	intronretention_Junction_48114	intronretentionleft-Junction_48114	J001	0.0727572	7.21596	0.0072258	0.0853692	6.38017	5.30293	-0.266805	chr3L	4433459	4433613	155	+	74	357	167	201	0.6066	0.5891	0.7591	0.8701
nAChRbeta1	intronretention_Junction_48114	intronretentionleft-Junction_48114	J002	0.0788405	6.73402	0.00945912	0.102229	3.54836	4.56749	0.36425	chr3L	4433411	4433507	97	+	48	249	53	30	0.3934	0.4109	0.2409	0.1299
nAChRbeta1	intronretention_Junction_48114	intronretentionright-Junction_48114	J001	0.241485	7.51348	0.00612389	0.0769142	6.83884	4.88873	-0.48429	chr3L	4433459	4433613	155	+	74	357	167	201	0.2291	0.4851	0.7106	0.8739
nAChRbeta1	intronretention_Junction_48114	intronretentionright-Junction_48114	J002	0.240367	7.547	0.00601102	0.0761445	4.15637	5.9624	0.520568	chr3L	4433566	4433662	97	+	249	379	68	29	0.7709	0.5149	0.2894	0.1261	-0.148535
CG10103	intronretention_Junction_50040	intronretentionleft-Junction_50040	J001	0.4127	4.67799	0.0305515	0.215873	2.48313	4.58999	0.886329	chr3L	6747593	6747843	251	-	195	27	18	17	0.8553	0.3971	0.1935	0.17
CG10103	intronretention_Junction_50040	intronretentionleft-Junction_50040	J002	0.428699	4.50876	0.0337217	0.229119	4.80268	2.56122	-0.907006	chr3L	6747546	6747641	96	-	33	41	75	83	0.1447	0.6029	0.8065	0.83
CG10103	intronretention_Junction_50040	intronretentionright-Junction_50040	J001	0.111803	15.7098	7.38425e-05	0.002586	2.59469	4.3935	0.759809	chr3L	6747593	6747843	251	-	195	27	18	17	0.7169	0.6136	0.2727	0.1349
CG10103	intronretention_Junction_50040	intronretentionright-Junction_50040	J002	0.117174	15.0921	0.000102389	0.00338427	4.93876	2.96159	-0.737775	chr3L	6747796	6747892	97	-	77	17	48	109	0.2831	0.3864	0.7273	0.8651	0.437742
RpL15	intronretention_Junction_53998	intronretentionleft-Junction_53998	J001	0.148607	6.55784	0.0104423	0.109821	1.97992	3.28939	0.732379	chr3LHet	2397991	2398048	58	+	61	17	10	21	0.5083	0.3469	0.2	0.0955
RpL15	intronretention_Junction_53998	intronretentionleft-Junction_53998	J002	0.129919	7.39302	0.00654774	0.0801951	4.87785	3.42833	-0.50874	chr3LHet	2397945	2398039	95	+	59	32	40	199	0.4917	0.6531	0.8	0.9045
RpL15	intronretention_Junction_53998	intronretentionright-Junction_53998	J001	0.196516	5.70234	0.0169423	0.151134	1.99248	3.27772	0.718129	chr3LHet	2397991	2398048	58	+	61	17	10	21	0.7176	0.4359	0.2564	0.175
RpL15	intronretention_Junction_53998	intronretentionright-Junction_53998	J002	0.191787	5.82777	0.0157751	0.144875	3.79575	2.4199	-0.649441	chr3LHet	2398001	2398095	95	+	24	22	29	99	0.2824	0.5641	0.7436	0.825	0.340789
dpr9	intronretention_Junction_54976	intronretentionleft-Junction_54976	J001	0.059765	12.9318	0.00032304	0.0084024	5.35659	4.31272	-0.312716	chr3R	10902008	10902756	749	-	43	34	283	346	0.6825	0.5075	0.8708	0.8586
dpr9	intronretention_Junction_54976	intronretentionleft-Junction_54976	J002	0.0807684	10.2369	0.00137659	0.0261801	2.40255	3.55854	0.56672	chr3R	10901960	10902056	97	-	20	33	42	57	0.3175	0.4925	0.1292	0.1414
dpr9	intronretention_Junction_54976	intronretentionright-Junction_54976	J001	0.0626187	20.1791	7.0518e-06	0.000378668	5.73578	3.99796	-0.520727	chr3R	10902008	10902756	749	-	43	34	283	346	0.2829	0.3953	0.7861	0.7047
dpr9	intronretention_Junction_54976	intronretentionright-Junction_54976	J002	0.0660293	19.2862	1.12517e-05	0.000558222	3.74722	5.53949	0.563932	chr3R	10902709	10902805	97	-	109	52	77	145	0.7171	0.6047	0.2139	0.2953	-0.185116
Sap47	intronretention_Junction_55857	intronretentionleft-Junction_55857	J001	0.40814	9.6706	0.0018724	0.0332972	11.0357	8.35014	-0.402311	chr3R	11779977	11780303	327	+	30	836	3183	1737	0.4762	0.8782	0.9746	0.9903
Sap47	intronretention_Junction_55857	intronretentionleft-Junction_55857	J002	0.454839	8.71185	0.00316149	0.0494336	2.79541	4.72457	0.757122	chr3R	11779929	11780025	97	+	33	116	83	17	0.5238	0.1218	0.0254	0.0097
Sap47	intronretention_Junction_55857	intronretentionright-Junction_55857	J001	0.167632	25.3418	4.80199e-07	3.75735e-05	11.1555	8.24405	-0.43633	chr3R	11779977	11780303	327	+	30	836	3183	1737	0.7317	0.898	0.9907	0.9954
Sap47	intronretention_Junction_55857	intronretentionright-Junction_55857	J002	0.21567	20.4547	6.10604e-06	0.00033444	1.79877	3.91055	1.12036	chr3R	11780256	11780352	97	+	11	95	30	8	0.2683	0.102	0.0093	0.0046	-0.200988
Sap47	intronretention_Junction_55895	intronretentionleft-Junction_55895	J001	0.0755928	6.61334	0.0101218	0.107523	5.09956	6.24272	0.291802	chr3R	11785270	11785462	193	+	101	363	183	93	0.1327	0.1658	0.0796	0.0421
Sap47	intronretention_Junction_55895	intronretentionleft-Junction_55895	J002	0.0697524	7.13815	0.00754609	0.0875666	11.6573	10.4308	-0.16038	chr3R	11785222	11785318	97	+	660	1827	2117	2114	0.8673	0.8342	0.9204	0.9579
Sap47	intronretention_Junction_55895	intronretentionright-Junction_55895	J001	0.0767882	4.08705	0.0432129	0.261971	5.19106	6.14211	0.242705	chr3R	11785270	11785462	193	+	101	363	183	93	0.0672	0.1228	0.0489	0.037
Sap47	intronretention_Junction_55895	intronretentionright-Junction_55895	J002	0.0706356	4.43076	0.0352968	0.234735	12.7305	11.7034	-0.121366	chr3R	11785415	11785511	97	+	1403	2594	3558	2422	0.9328	0.8772	0.9511	0.963	0.145219
CRMP	intronretention_Junction_57811	intronretentionleft-Junction_57811	J001	0.262942	6.92069	0.00852041	0.0953186	8.30364	6.4082	-0.373825	chr3R	1402981	1403313	333	+	37	372	878	653	0.5	0.8455	0.9554	0.9436
CRMP	intronretention_Junction_57811	intronretentionleft-Junction_57811	J002	0.301931	6.07239	0.0137311	0.131299	2.61032	4.03633	0.62882	chr3R	1402933	1403029	97	+	37	68	41	39	0.5	0.1545	0.0446	0.0564
CRMP	intronretention_Junction_57811	intronretentionright-Junction_57811	J001	0.201507	6.77097	0.00926523	0.10083	8.15128	6.55072	-0.315373	chr3R	1402981	1403313	333	+	37	372	878	653	0.5606	0.8267	0.9533	0.9171
CRMP	intronretention_Junction_57811	intronretentionright-Junction_57811	J002	0.233413	5.91407	0.0150204	0.140201	2.82503	4.09319	0.534958	chr3R	1403266	1403362	97	+	29	78	43	59	0.4394	0.1733	0.0467	0.0829	-0.182633
Atpalpha	intronretention_Junction_60662	intronretentionleft-Junction_60662	J001	0.0553011	7.88415	0.004987	0.0678124	7.39879	6.3334	-0.224308	chr3R	16792335	16792828	494	+	114	371	384	400	0.4506	0.4411	0.6144	0.7435
Atpalpha	intronretention_Junction_60662	intronretentionleft-Junction_60662	J002	0.0559949	7.79385	0.00524244	0.0699656	5.78364	6.83952	0.241918	chr3R	16792299	16792383	85	+	139	470	241	138	0.5494	0.5589	0.3856	0.2565
Atpalpha	intronretention_Junction_60662	intronretentionright-Junction_60662	J001	0.0247309	17.1981	3.36769e-05	0.00136029	7.49284	6.26024	-0.259296	chr3R	16792335	16792828	494	+	114	371	384	400	0.3738	0.2959	0.5792	0.5626
Atpalpha	intronretention_Junction_60662	intronretentionright-Junction_60662	J002	0.0241624	17.5637	2.77845e-05	0.00117155	6.81834	8.02967	0.23592	chr3R	16792781	16792877	97	+	191	883	279	311	0.6262	0.7041	0.4208	0.4374	-0.190282
Hsromega	intronretention_Junction_61083	intronretentionleft-Junction_61083	J001	0.394865	4.30305	0.0380441	0.245132	3.4459	1.99335	-0.789685	chr3R	17122866	17123530	665	+	11	15	49	75	0.0231	0.005	0.0407	0.1366
Hsromega	intronretention_Junction_61083	intronretentionleft-Junction_61083	J002	0.330458	5.1172	0.0236899	0.186118	8.96885	11.323	0.336257	chr3R	17122818	17122914	97	+	466	2973	1156	474	0.9769	0.995	0.9593	0.8634
Hsromega	intronretention_Junction_61083	intronretentionright-Junction_61083	J001	0.20246	7.08747	0.00776247	0.0893206	3.3745	2.03469	-0.729864	chr3R	17122866	17123530	665	+	11	15	49	75	0.0435	0.0185	0.1032	0.2252
Hsromega	intronretention_Junction_61083	intronretentionright-Junction_61083	J002	0.16266	8.66626	0.00324156	0.0505544	6.72025	8.53595	0.345036	chr3R	17123483	17123578	96	+	242	798	426	258	0.9565	0.9815	0.8968	0.7748	-0.131731
RpI12	intronretention_Junction_61371	intronretentionleft-Junction_61371	J001	0.133883	6.25993	0.0123499	0.122898	1.88464	2.8118	0.577204	chr3R	17603035	17603098	64	-	18	28	20	20	0.5625	0.3415	0.1724	0.1333
RpI12	intronretention_Junction_61371	intronretentionleft-Junction_61371	J002	0.105751	7.45916	0.00631143	0.0784233	4.14169	3.22508	-0.360886	chr3R	17602987	17603083	97	-	14	54	96	130	0.4375	0.6585	0.8276	0.8667
RpI12	intronretention_Junction_61371	intronretentionright-Junction_61371	J001	0.0978152	9.08632	0.00257528	0.04264	1.81647	2.91028	0.680021	chr3R	17603035	17603098	64	-	18	28	20	20	0.4091	0.2593	0.0816	0.1053
RpI12	intronretention_Junction_61371	intronretentionright-Junction_61371	J002	0.0674656	11.8214	0.000585547	0.0132527	5.07489	4.0827	-0.313854	chr3R	17603051	17603145	95	-	26	80	225	170	0.5909	0.7407	0.9184	0.8947	0.34984
sba	intronretention_Junction_63566	intronretentionleft-Junction_63566	J001	0.0805499	16.176	5.77222e-05	0.00214576	3.26992	2.21409	-0.562543	chr3R	19747502	19748616	1115	-	14	28	31	58	0.5185	0.4242	0.8611	0.9062
sba	intronretention_Junction_63566	intronretentionleft-Junction_63566	J002	0.0996929	14.1294	0.000170655	0.00510215	1.21667	2.38596	0.971625	chr3R	19747457	19747550	94	-	13	38	5	6	0.4815	0.5758	0.1389	0.0938
sba	intronretention_Junction_63566	intronretentionright-Junction_63566	J001	0.170505	5.05669	0.0245311	0.190422	3.19328	2.266	-0.494892	chr3R	19747502	19748616	1115	-	14	28	31	58	0.3182	0.5091	0.6739	0.8286
sba	intronretention_Junction_63566	intronretentionright-Junction_63566	J002	0.178696	4.8688	0.0273465	0.203175	1.84566	2.73356	0.566643	chr3R	19748569	19748661	93	-	30	27	15	12	0.6818	0.4909	0.3261	0.1714	-0.298761
slo	intronretention_Junction_64598	intronretentionleft-Junction_64598	J001	0.159703	3.86086	0.049425	0.28317	7.0494	5.78726	-0.284622	chr3R	20501040	20501353	314	+	60	422	303	268	0.4255	0.3163	0.5197	0.7635
slo	intronretention_Junction_64598	intronretentionleft-Junction_64598	J002	0.157742	3.90732	0.0480761	0.278438	6.08334	7.35158	0.273191	chr3R	20500992	20501088	97	+	81	912	280	83	0.5745	0.6837	0.4803	0.2365
slo	intronretention_Junction_64598	intronretentionright-Junction_64598	J001	0.0821055	16.5107	4.83755e-05	0.00184002	7.33329	5.54221	-0.404	chr3R	20501040	20501353	314	+	60	422	303	268	0.3141	0.3523	0.6645	0.8097
slo	intronretention_Junction_64598	intronretentionright-Junction_64598	J002	0.0814316	16.6364	4.5274e-05	0.00173864	5.2206	6.96658	0.416234	chr3R	20501306	20501402	97	+	131	776	153	63	0.6859	0.6477	0.3355	0.1903	-0.236116
CG1091	intronretention_Junction_71038	intronretentionleft-Junction_71038	J001	0.0293248	54.9585	1.23103e-13	4.32219e-11	3.83348	5.68045	0.567353	chr3R	2909613	2909668	56	-	138	180	85	54	0.8734	0.8372	0.3617	0.4091
CG1091	intronretention_Junction_71038	intronretentionleft-Junction_71038	J002	0.0343285	49.232	2.27413e-12	5.8754e-10	4.72723	2.65648	-0.831476	chr3R	2909565	2909661	97	-	20	35	150	78	0.1266	0.1628	0.6383	0.5909
CG1091	intronretention_Junction_71038	intronretentionright-Junction_71038	J001	0.0447434	66.1821	4.1112e-16	2.16518e-13	3.62634	5.96403	0.717774	chr3R	2909613	2909668	56	-	138	180	85	54	0.9452	0.9474	0.3812	0.4779
CG1091	intronretention_Junction_71038	intronretentionright-Junction_71038	J002	0.0546495	57.5002	3.37948e-14	1.32215e-11	4.22998	1.67267	-1.3385	chr3R	2909621	2909716	96	-	8	10	138	59	0.0548	0.0526	0.6188	0.5221	0.365965
CG2993	intronretention_Junction_71440	intronretentionleft-Junction_71440	J001	0.0254599	7.71118	0.00548799	0.0721989	4.10092	4.80566	0.228787	chr3R	3632492	3632632	141	-	31	258	58	81	0.6078	0.6402	0.4603	0.4154
CG2993	intronretention_Junction_71440	intronretentionleft-Junction_71440	J002	0.0269461	7.39902	0.00652593	0.0800749	4.57906	3.84319	-0.252747	chr3R	3632442	3632540	99	-	20	145	68	114	0.3922	0.3598	0.5397	0.5846
CG2993	intronretention_Junction_71440	intronretentionright-Junction_71440	J001	0.0539445	12.2546	0.000464109	0.0111086	3.8831	5.01526	0.369117	chr3R	3632492	3632632	141	-	31	258	58	81	0.7381	0.7795	0.3973	0.5159
CG2993	intronretention_Junction_71440	intronretentionright-Junction_71440	J002	0.0601239	11.2321	0.000803929	0.0173085	4.18717	3.01399	-0.474302	chr3R	3632585	3632681	97	-	11	73	88	76	0.2619	0.2205	0.6027	0.4841	0.159671
CG14463	intronretention_Junction_71699	intronretentionleft-Junction_71699	J001	0.0463112	7.90171	0.00493882	0.0672908	4.5047	3.80669	-0.242895	chr3R	3826225	3826306	82	+	23	67	132	162	0.7188	0.6091	0.8627	0.8351
CG14463	intronretention_Junction_71699	intronretentionleft-Junction_71699	J002	0.0685385	5.92465	0.0149305	0.139742	2.08285	2.94299	0.498723	chr3R	3826177	3826273	97	+	9	43	21	32	0.2812	0.3909	0.1373	0.1649
CG14463	intronretention_Junction_71699	intronretentionright-Junction_71699	J001	0.0362899	13.4433	0.000245885	0.00690511	4.6094	3.72126	-0.308787	chr3R	3826225	3826306	82	+	23	67	132	162	0.4423	0.5447	0.7857	0.7678
CG14463	intronretention_Junction_71699	intronretentionright-Junction_71699	J002	0.0442174	11.8337	0.000581673	0.0131951	2.67374	3.68031	0.460968	chr3R	3826259	3826355	97	+	29	56	36	49	0.5577	0.4553	0.2143	0.2322	-0.121501
CG9775	intronretention_Junction_72379	intronretentionleft-Junction_72379	J001	0.0733512	6.68566	0.00971916	0.104216	4.52322	5.36241	0.245531	chr3R	465279	465354	76	-	23	295	140	77	0.7931	0.5948	0.4082	0.3793
CG9775	intronretention_Junction_72379	intronretentionleft-Junction_72379	J002	0.0738489	6.65517	0.00988683	0.105519	5.33184	4.48947	-0.248087	chr3R	465231	465327	97	-	6	201	203	126	0.2069	0.4052	0.5918	0.6207
CG9775	intronretention_Junction_72379	intronretentionright-Junction_72379	J001	0.0688517	4.38399	0.0362779	0.239054	4.48171	5.41094	0.271829	chr3R	465279	465354	76	-	23	295	140	77	0.4694	0.602	0.3933	0.2917
CG9775	intronretention_Junction_72379	intronretentionright-Junction_72379	J002	0.0677704	4.4501	0.0348992	0.233223	5.68988	4.75725	-0.258269	chr3R	465307	465403	97	-	26	195	216	187	0.5306	0.398	0.6067	0.7083	0.250398
Syn	intronretention_Junction_73996	intronretentionleft-Junction_73996	J001	0.507505	5.05361	0.0245746	0.19052	5.21672	3.06255	-0.768408	chr3R	6029870	6029932	63	+	15	78	152	117	0.0349	0.269	0.4841	0.7091
Syn	intronretention_Junction_73996	intronretentionleft-Junction_73996	J002	0.480051	5.33406	0.0209126	0.171165	4.77615	7.31347	0.614708	chr3R	6029822	6029918	97	+	415	212	162	48	0.9651	0.731	0.5159	0.2909
Syn	intronretention_Junction_73996	intronretentionright-Junction_73996	J001	0.569017	4.8178	0.0281674	0.206034	5.39957	2.93959	-0.877232	chr3R	6029870	6029932	63	+	15	78	152	117	0.042	0.3959	0.6696	0.7597
Syn	intronretention_Junction_73996	intronretentionright-Junction_73996	J002	0.545658	5.01891	0.0250719	0.192979	3.79337	6.48555	0.77375	chr3R	6029885	6029981	97	+	342	119	75	37	0.958	0.6041	0.3304	0.2403	-0.495409
NONE	intronretention_Junction_78493	intronretentionleft-Junction_78493	J001	0.0334234	11.9779	0.000538351	0.0124943	4.51611	3.57527	-0.337028	chr4	1287111	1287167	57	+	18	24	311	197	0.3529	0.4706	0.679	0.7061
NONE	intronretention_Junction_78493	intronretentionleft-Junction_78493	J002	0.0387251	10.9484	0.000936828	0.0192612	3.20572	4.24613	0.4055	chr4	1287068	1287159	92	+	33	27	147	82	0.6471	0.5294	0.321	0.2939
NONE	intronretention_Junction_78493	intronretentionright-Junction_78493	J001	0.0262021	54.0064	1.99837e-13	6.67406e-11	5.0266	3.17203	-0.664174	chr4	1287111	1287167	57	+	18	24	311	197	0.2169	0.2667	0.7283	0.7577
NONE	intronretention_Junction_78493	intronretentionright-Junction_78493	J002	0.0289641	50.7025	1.07485e-12	3.00366e-10	3.23299	5.21054	0.688561	chr4	1287120	1287213	94	+	65	66	116	63	0.7831	0.7333	0.2717	0.2423	-0.237417
pan	intronretention_Junction_78555	intronretentionleft-Junction_78555	J001	0.199246	4.32009	0.0376648	0.243966	0.757545	1.54737	1.03042	chr4	128998	129051	54	+	13	13	2	1	0.194	0.13	0.0588	0.0145
pan	intronretention_Junction_78555	intronretentionleft-Junction_78555	J002	0.0989923	6.34336	0.0117821	0.119241	3.97887	3.35068	-0.247904	chr4	128959	129046	88	+	54	87	32	68	0.806	0.87	0.9412	0.9855
pan	intronretention_Junction_78555	intronretentionright-Junction_78555	J001	0.156302	3.0979	0.0783934	0.360578	0.805867	1.45353	0.850945	chr4	128998	129051	54	+	13	13	2	1	0.104	0.0812	0.04	0.013
pan	intronretention_Junction_78555	intronretentionright-Junction_78555	J002	0.0625602	4.6634	0.0308121	0.217367	4.59769	4.18147	-0.136899	chr4	129004	129099	96	+	112	147	48	76	0.896	0.9188	0.96	0.987	0.207703
CG32000	intronretention_Junction_78796	intronretentionleft-Junction_78796	J001	0.0737891	10.9279	0.000947246	0.0194462	2.68376	1.64003	-0.710535	chr4	154339	154419	81	+	5	8	38	60	0.1087	0.129	0.4634	0.3681
CG32000	intronretention_Junction_78796	intronretentionleft-Junction_78796	J002	0.057402	12.6829	0.000369016	0.00935978	3.21594	4.15047	0.368035	chr4	154295	154387	93	+	41	54	44	103	0.8913	0.871	0.5366	0.6319
CG32000	intronretention_Junction_78796	intronretentionright-Junction_78796	J001	0.0789849	9.95299	0.00160588	0.0297555	2.68374	1.64017	-0.710394	chr4	154339	154419	81	+	5	8	38	60	0.0781	0.092	0.3654	0.2691
CG32000	intronretention_Junction_78796	intronretentionright-Junction_78796	J002	0.0574011	12.1156	0.000500015	0.0117439	3.90353	4.841	0.310528	chr4	154372	154467	96	+	59	79	66	163	0.9219	0.908	0.6346	0.7309	-0.3734
dpr7	intronretention_Junction_79102	intronretentionleft-Junction_79102	J001	0.111246	6.53437	0.010581	0.111003	1.17522	1.88374	0.680676	chr4	273337	273448	112	-	20	21	4	3	0.5405	0.5833	0.25	0.1429
dpr7	intronretention_Junction_79102	intronretentionleft-Junction_79102	J002	0.105492	6.72365	0.00951428	0.102582	2.36578	1.68003	-0.493829	chr4	273291	273385	95	-	17	15	12	18	0.4595	0.4167	0.75	0.8571
dpr7	intronretention_Junction_79102	intronretentionright-Junction_79102	J001	0.130254	7.71089	0.00548887	0.0721989	1.15921	1.91173	0.721737	chr4	273337	273448	112	-	20	21	4	3	0.5714	0.7	0.2222	0.1765
dpr7	intronretention_Junction_79102	intronretentionright-Junction_79102	J002	0.131249	7.67816	0.00558931	0.0728241	2.26802	1.50414	-0.592495	chr4	273401	273492	92	-	15	9	14	14	0.4286	0.3	0.7778	0.8235	0.394298
NONE	intronretention_Junction_80167	intronretentionleft-Junction_80167	J001	0.225175	5.34348	0.0207999	0.170826	1.06698	1.93744	0.860613	chr4	599529	599610	82	-	18	18	1	6	0.2857	0.1324	0.0222	0.0444
NONE	intronretention_Junction_80167	intronretentionleft-Junction_80167	J002	0.156197	6.82557	0.0089862	0.0987215	4.71069	3.68562	-0.35403	chr4	599483	599577	95	-	45	118	44	129	0.7143	0.8676	0.9778	0.9556
NONE	intronretention_Junction_80167	intronretentionright-Junction_80167	J001	0.12921	8.75299	0.00309095	0.0487047	0.988588	2.0825	1.07488	chr4	599529	599610	82	-	18	18	1	6	0.1233	0.1029	0.0076	0.0262
NONE	intronretention_Junction_80167	intronretentionright-Junction_80167	J002	0.0504212	14.3356	0.000152944	0.00468515	5.86492	5.16298	-0.183906	chr4	599563	599650	88	-	128	157	130	223	0.8767	0.8971	0.9924	0.9738	0.274813
RpS3A	intronretention_Junction_80501	intronretentionleft-Junction_80501	J001	0.0651898	26.6368	2.45518e-07	2.10117e-05	5.98743	4.2085	-0.508631	chr4	86675	86729	55	-	69	34	212	357	0.4894	0.382	0.8314	0.8925
RpS3A	intronretention_Junction_80501	intronretentionleft-Junction_80501	J002	0.0748052	23.7604	1.09104e-06	7.35941e-05	2.72936	4.51768	0.727017	chr4	86627	86723	97	-	72	55	43	43	0.5106	0.618	0.1686	0.1075
RpS3A	intronretention_Junction_80501	intronretentionright-Junction_80501	J001	0.0971847	20.4716	6.05222e-06	0.000332823	5.97129	4.23976	-0.494061	chr4	86675	86729	55	-	69	34	212	357	0.633	0.4595	0.8983	0.9395
RpS3A	intronretention_Junction_80501	intronretentionright-Junction_80501	J002	0.120584	17.0594	3.62277e-05	0.00145048	2.0479	3.6762	0.844068	chr4	86682	86778	97	-	40	40	24	23	0.367	0.5405	0.1017	0.0605	-0.320566
unc-13	intronretention_Junction_80648	intronretentionleft-Junction_80648	J001	0.0598216	6.99638	0.00816747	0.0922748	2.99638	3.91964	0.387504	chr4	923208	923450	243	-	16	77	39	87	0.4211	0.5423	0.2229	0.2788
unc-13	intronretention_Junction_80648	intronretentionleft-Junction_80648	J002	0.0509129	7.96421	0.00477114	0.0654694	4.7294	3.87563	-0.287227	chr4	923161	923256	96	-	22	65	136	225	0.5789	0.4577	0.7771	0.7212
unc-13	intronretention_Junction_80648	intronretentionright-Junction_80648	J001	0.0596085	8.62184	0.00332156	0.0514482	2.95102	3.97634	0.43023	chr4	923208	923450	243	-	16	77	39	87	0.5333	0.6814	0.3545	0.3118
unc-13	intronretention_Junction_80648	intronretentionright-Junction_80648	J002	0.0547177	9.23403	0.00237558	0.0401096	4.07184	3.10322	-0.391914	chr4	923403	923499	97	-	14	36	71	192	0.4667	0.3186	0.6455	0.6882	0.247606
Spase25	intronretention_Junction_83216	intronretentionleft-Junction_83216	J001	0.0199565	18.9316	1.35488e-05	0.000650961	7.03167	5.8225	-0.272228	chrX	11380198	11380267	70	+	155	42	309	745	0.1881	0.155	0.3348	0.378
Spase25	intronretention_Junction_83216	intronretentionleft-Junction_83216	J002	0.0187399	19.9102	8.11676e-06	0.000427472	8.38909	9.52275	0.182863	chrX	11380150	11380246	97	+	669	229	614	1226	0.8119	0.845	0.6652	0.622
Spase25	intronretention_Junction_83216	intronretentionright-Junction_83216	J001	0.0156816	17.3953	3.03579e-05	0.00125586	6.9878	5.83619	-0.259811	chrX	11380198	11380267	70	+	155	42	309	745	0.2881	0.35	0.522	0.5141
Spase25	intronretention_Junction_83216	intronretentionright-Junction_83216	J002	0.0151689	17.8637	2.37309e-05	0.00103158	6.83391	7.93277	0.215114	chrX	11380220	11380316	97	+	383	78	283	704	0.7119	0.65	0.478	0.4859	-0.232602
CG32581	intronretention_Junction_89715	intronretentionleft-Junction_89715	J001	0.202656	19.0864	1.24931e-05	0.000609891	7.76695	4.50083	-0.787157	chrX	15691404	15691468	65	-	76	166	368	346	0.2815	0.5666	0.9558	0.9153
CG32581	intronretention_Junction_89715	intronretentionleft-Junction_89715	J002	0.210744	18.3923	1.7978e-05	0.000831663	2.66344	5.37692	1.01349	chrX	15691356	15691452	97	-	194	127	17	32	0.7185	0.4334	0.0442	0.0847
CG32581	intronretention_Junction_89715	intronretentionright-Junction_89715	J001	0.0697775	70.4542	4.71079e-17	3.07166e-14	7.78456	4.4909	-0.793611	chrX	15691404	15691468	65	-	76	166	368	346	0.4368	0.5825	0.9787	0.983
CG32581	intronretention_Junction_89715	intronretentionright-Junction_89715	J002	0.0804194	63.0352	2.0305e-15	9.92987e-13	1.48109	4.42857	1.58018	chrX	15691421	15691517	97	-	98	119	8	6	0.5632	0.4175	0.0213	0.017	-0.385303
sun	intronretention_Junction_89887	intronretentionleft-Junction_89887	J001	0.0308691	57.6881	3.0715e-14	1.237e-11	1.88711	4.20866	1.15718	chrX	15742037	15742329	293	-	163	305	8	2	0.4939	0.5241	0.0734	0.0323
sun	intronretention_Junction_89887	intronretentionleft-Junction_89887	J002	0.0295147	59.0879	1.50784e-14	6.88227e-12	6.27452	4.14229	-0.599075	chrX	15741990	15742085	96	-	167	277	101	60	0.5061	0.4759	0.9266	0.9677
sun	intronretention_Junction_89887	intronretentionright-Junction_89887	J001	0.104064	37.4452	9.40188e-10	1.46262e-07	1.92633	4.14686	1.10617	chrX	15742037	15742329	293	-	163	305	8	2	0.7799	0.6963	0.125	0.0377
sun	intronretention_Junction_89887	intronretentionright-Junction_89887	J002	0.120117	33.6179	6.70735e-09	8.50405e-07	5.4516	2.64141	-1.04537	chrX	15742282	15742378	97	-	46	133	56	51	0.2201	0.3037	0.875	0.9623	0.574858
CG3262	intronretention_Junction_9200	intronretentionleft-Junction_9200	J001	0.0682108	12.2658	0.000461335	0.0111086	2.17694	3.38937	0.638717	chr2L	22246534	22246645	112	+	27	88	22	13	0.3293	0.3438	0.1302	0.0747
CG3262	intronretention_Junction_9200	intronretentionleft-Junction_9200	J002	0.0493277	15.5219	8.15566e-05	0.00278493	5.57496	4.50469	-0.307535	chr2L	22246486	22246582	97	+	55	168	147	161	0.6707	0.6562	0.8698	0.9253
CG3262	intronretention_Junction_9200	intronretentionright-Junction_9200	J001	0.0907345	9.19761	0.00242332	0.0405654	2.21505	3.33119	0.588698	chr2L	22246534	22246645	112	+	27	88	22	13	0.3068	0.2733	0.1202	0.0583
CG3262	intronretention_Junction_9200	intronretentionright-Junction_9200	J002	0.0697662	11.2665	0.000789183	0.0170178	6.03941	4.91475	-0.297289	chr2L	22246598	22246693	96	+	61	234	161	210	0.6932	0.7267	0.8798	0.9417	0.318818
NONE	intronretention-Junction_36493	intronretentionshort-Junction_36493	J001	0.0620909	40.2773	2.20351e-10	3.91852e-08	6.02924	3.72848	-0.693391	chr3L	11247752	11247780	29	-	15	10	735	1210	0.3125	0.5263	0.9074	0.9315
NONE	intronretention-Junction_36493	intronretentionshort-Junction_36493	J002	0.0886467	30.9189	2.69039e-08	3.04458e-06	2.08902	4.83015	1.20924	chr3L	11247741	11247792	52	-	33	9	75	89	0.6875	0.4737	0.0926	0.0685	-0.500039

## Sheet: AS MXE events
Gene	AS_event_ID	AS_structure_ID	sub_junction_ID	sub-junction_dispersion_estimate	LRT_statistic-full_vs_reduced	LRT_p_value-full_vs_reduced	BH_adjusted_p-values	LNv	TH	fitting_parameter_log2fold_change_TH_LNv	sub_junction_chr	sub_junction_start_coor	sub_junction_end_coor	sub_junction_length	sub_junction_strand	raw_count.IndexA	raw_count.IndexB	raw_count.IndexC	raw_count.IndexD	percentage_usage.IndexA	percentage_usage.IndexB	percentage_usage.IndexC	percentage_usage.IndexD	deltaPSI
Gs1l	5_Junction_11024_Junction_11025*3_Junction_11026_Junction_11027	3_Junction_11026_Junction_11027	J001	0.0772631	0.258804	0.610943	0.853814	3.65141	3.77612	0.0484503	chr2L	4456075	4456384	310	-	19	62	76	124	0.2676	0.1717	0.1453	0.2095	0.04225
Gs1l	5_Junction_11024_Junction_11025*3_Junction_11026_Junction_11027	3_Junction_11026_Junction_11027	J002	0.0649417	0.283226	0.594594	0.848544	6.66756	6.53887	-0.0281181	chr2L	4456332	4456384	53	-	52	299	447	468	0.7324	0.8283	0.8547	0.7905	-0.04225
Gs1l	5_Junction_11024_Junction_11025*3_Junction_11026_Junction_11027	5_Junction_11024_Junction_11025	J001	0.035444	3.81171	0.0508955	0.28844	3.82185	4.4618	0.223353	chr2L	4455738	4455855	118	-	18	127	120	68	0.375	0.4721	0.3117	0.2787	0.12835
Gs1l	5_Junction_11024_Junction_11025*3_Junction_11026_Junction_11027	5_Junction_11024_Junction_11025	J002	0.030794	4.29113	0.0383116	0.245715	5.40773	4.82515	-0.164451	chr2L	4455738	4456112	375	-	30	142	265	176	0.625	0.5279	0.6883	0.7213	-0.12835
nAChRalpha6	5_Junction_15330_Junction_15331*3_Junction_15334_Junction_15340	3_Junction_15334_Junction_15340	J001	0.0332242	10.68	0.00108303	0.0215238	3.91012	4.72643	0.273536	chr2L	9819331	9825611	6281	-	41	343	66	23	0.7069	0.7555	0.5156	0.451	0.2479
nAChRalpha6	5_Junction_15330_Junction_15331*3_Junction_15334_Junction_15340	3_Junction_15334_Junction_15340	J002	0.0405792	9.3129	0.00227546	0.0389221	3.92463	2.99237	-0.391268	chr2L	9825341	9825611	271	-	17	111	62	28	0.2931	0.2445	0.4844	0.549	-0.2479
nAChRalpha6	5_Junction_15330_Junction_15331*3_Junction_15334_Junction_15340	5_Junction_15330_Junction_15331	J001	0.0468847	5.01295	0.0251584	0.193382	2.99919	3.59225	0.260317	chr2L	9815912	9819285	3374	-	22	180	38	10	0.6667	0.7317	0.5	0.4762	0.2111
nAChRalpha6	5_Junction_15330_Junction_15331*3_Junction_15334_Junction_15340	5_Junction_15330_Junction_15331	J002	0.0579492	4.35066	0.0369946	0.241453	3.02892	2.3556	-0.362709	chr2L	9815912	9825295	9384	-	11	66	38	11	0.3333	0.2683	0.5	0.5238	-0.2111

## Sheet: Notes
See https://github.com/qqwang-berkeley/JUM/wiki/0.c-Output-files for a detailed explanation of the JUM output
Differentially spliced AS events in LNv neurons compared to non-circadian TH neurons, in five conventionally recognized AS categories: cassette exon, A5SS (alternative 5' splice site), A3SS (alternative 3' splice site), intron retention and MXE (mutually exclusively spliced exons)
1) Each tab represents the differentially spliced AS events in each AS pattern category
2) Each spreadsheet contains the following information for each AS junction:
Gene	The gene that the AS event is associated with.
AS event ID	The AS event ID
AS structure ID	The AS structures that the specific AS event covers.
sub_junction ID	the sub_AS_junctions that each AS structure includes from the specific AS event.
	The first four columns specify the ID of the AS event, the gene it is associated with, and the basic structure of the AS event in terms of JUM definition (refer to the JUM paper for details). In JUM, each AS event will contain several AS_structures and each AS_structure contains several sub_AS_junctions.
	Each cassette exon AS event, intron retention event with intron size larger than read length, and MXE AS event has two AS structures, and each AS structure has two sub-AS-junctions. As a result each AS event will have four lines in the final output specifying the differential splicing and structure of the AS event.
	Each intron retention event with intron size smaller than the read length has one AS structure that has two sub-AS-junctions. As a result each of these small intron retention AS event will have two lines in the final output specifying the differential splicing and structure of the AS events.
	Each A5SS and A3SS AS events has one AS structure and each AS structure has several sub-AS-junctions, depending on how many alternative 5' or 3' splice sites the AS event covers. As a result each A5SS and A3SS AS event will have multiple lines in the final output specifying the differential splicing and structure of the AS event.
sub-junction_dispersion_estimate	The estimated dispersion parameter when modeling the count data as negative binomial distributions. Each sub_AS_junction receives one dispersion parameter. This is for monitoring purpose and users can ignore this information.
LRT_statistic-full_vs_reduced	The statistic calculated to perform a statistic test for differential AS between two conditions, checking whether the corresponding sub_AS_junction is differentially spliced between the two conditions under comparison. This is calculated from comparing two generalized linear models. Monitoring purpose only. Users can skip this information.
LRT_p_value-full_vs_reduced	The pvalue of the statistical test for differential AS analysis. This is to test whether the corresponding sub_AS_junction is significantly differentially spliced between the two conditions under comparison.
BH_adjusted_p-values	Corrected pvalue for differential AS analysis between conditions
LNv
TH
fitting_parameter_log2fold_change_TH_LNv	Columns 9-11 all contain intermediate information calculated during the generalized linear model fitting for differential AS analysis. Users can skip this information.
sub_junction_chr
sub_junction_start_coor
sub_junction_end_coor
sub_junction_size
sub_junction_strand	Columns 12-16 specify the chromosome coordinates, strand, size, etc. information of the specific sub_AS_junction.
raw_count.IndexA
raw_count.IndexB
raw_count.IndexC
raw_count.IndexD	The raw read counts of reads that mapped to the sub_AS_junction in each of the neuron group sample replicates. IndexA and B are LNv neurons and IndexC and D are TH neurons.
percentage_usage.IndexA
percentage_usage.IndexB
percentage_usage.IndexC
percentage_usage.IndexD	The percentage usage of that sub_AS_junction in the AS structure in each of the neuron group sample replicates. If the sub_AS_junction is significantly differentially spliced between two neuron groups, users can detect a significant difference in the percentage usage between the two neuron groups (indexA,B - LNv v.s. Index C,D - TH).
delta Percent spliced In (deltaPSI)	This column describes the level of changes of that significantly differentially spliced AS event between two neuron groups.
	For a cassette exon event, each AS event contains two AS_structures that include four sub_AS_junctions in total. So each cassette exon AS event will have four lines in the cassette exon output file. One deltaPSI value will be calculated for each cassette exon AS event (aka, every four lines). deltaPSI here is calculated as the difference in the ratio of exon_inclusion_isoform between LNv and TH s…
	deltaPSI = exon_inclusion_isoform \ (exon_inclusion_isoform + exon_exclusion_isoform) (under LNv) - exon_inclusion_isoform \ (exon_inclusion_isoform + exon_exclsion_isoform) (under TH).
	For an intron retention event, each AS event contains either two AS_structures with four sub_AS_junctions (when the intron size is longer than the RNA-seq read length) and so four lines in the intron_retention output file, or one AS_Structure and two sub_AS_junctions (when the intron size is smaller than the RNA-seq read length) and so two lines in the output file . One deltaPSI value is calculat…
	deltaPSI = intron_inclusion_isoform / (intron_inclusion_isoform+intron_exclusion_isoform) (under LNv) - intron_inclusion_isoform / (intron_inclusion_isoform+intron_exclusion_isoform) (under TH)
	For an A5SS or A3SS, each AS event contains one AS structure and several sub_AS_junctions, depending on how many alternative 5'/3' splice sites are there. One deltaPSI value is calculated for EACH sub_AS_junction (so, every line). Here deltaPSI is calculated as the change in the percentage of usage for each sub_AS_junctionbetween LNv and TH samples:
	deltaPSI = sub_AS_junction_i / (sub_AS_junction_1+sub_AS_junction_2+ ... +sub_AS_junction_i+ ...+sub_AS_junction_n) (under LNv) - sub_AS_junction_i / (sub_AS_junction_1+sub_AS_junction_2+ ... + sub_AS_junction_i+...+sub_AS_junction_n) (under TH). It is calculated this way because A5SS and A3SS events usually have more than two alternative splicing isoforms (not like cassette exon and intron reten…
