# Supplementary material for: Striking circadian neuron diversity and cycling of Drosophila alternative splicing
Source: eLife journal article supplement (doi:10.7554/elife.35618), 2018-06-04
Supplement: supp [file elife-35618-supp-v1.zip › elife_poa_e35618_Figure_3_source_data_4.xlsx]

## Sheet: AS cassette exon events
Gene	AS_event_ID	AS_structure_ID	sub_junction_ID	sub-junction_dispersion_estimate	LRT_statistic-full_vs_reduced	LRT_p_value-full_vs_reduced	BH_adjusted_p-values	DN1	LNd	fitting_parameter_log2fold_change_LNd_DN1	sub_junction_chr	sub_junction_start_coor	sub_junction_end_coor	sub_junction_size	sub_junction_strand	raw_count.DN1_A	raw_count.DN1_B	raw_count.LNd_A	raw_count.LNd_B	percentage_usage.DN1_A	percentage_usage.DN1_B	percentage_usage.LNd_A	percentage_usage.LNd_B	deltaPSI
rg	3_Junction_101565_Junction_101568*5_Junction_101563_Junction_101565	3_Junction_101565_Junction_101568	J001	0.0310026	8.40088	0.0037504	0.0455857	14.1865	12.9825	-0.515932	chrX	5070821	5080934	10114	+	205	164	124	208	0.7736	0.8542	0.6327	0.6667
rg	3_Junction_101565_Junction_101568*5_Junction_101563_Junction_101565	3_Junction_101565_Junction_101568	J002	0.0312279	8.35867	0.00383851	0.0464186	9.48103	10.9369	0.667933	chrX	5071650	5080934	9285	+	60	28	72	104	0.2264	0.1458	0.3673	0.3333
rg	3_Junction_101565_Junction_101568*5_Junction_101563_Junction_101565	5_Junction_101563_Junction_101565	J001	0.0245875	0.115874	0.733553	0.971689	5.89387	6.12145	0.13477	chrX	5070821	5071598	778	+	14	14	14	14	0.0639	0.0787	0.1014	0.0631
rg	3_Junction_101565_Junction_101568*5_Junction_101563_Junction_101565	5_Junction_101563_Junction_101565	J002	0.0229988	0.11786	0.731367	0.97056	13.6302	13.5368	-0.0400435	chrX	5070821	5080934	10114	+	205	164	124	208	0.9361	0.9213	0.8986	0.9369	-0.151185
qtc	3_Junction_11526_Junction_11528*5_Junction_11524_Junction_11526	3_Junction_11526_Junction_11528	J001	0.0205894	98.5469	3.17423e-23	4.01343e-20	13.3357	8.32288	-2.27744	chr2L	5068394	5070095	1702	+	267	233	18	25	0.3504	0.3442	0.0291	0.0553
qtc	3_Junction_11526_Junction_11528*5_Junction_11524_Junction_11526	3_Junction_11526_Junction_11528	J002	0.0203831	99.2502	2.22536e-23	2.87764e-20	15.4787	19.0211	1.47812	chr2L	5069219	5070095	877	+	495	444	601	427	0.6496	0.6558	0.9709	0.9447
qtc	3_Junction_11526_Junction_11528*5_Junction_11524_Junction_11526	5_Junction_11524_Junction_11526	J001	0.00644847	125.784	3.42925e-29	9.29116e-26	13.7127	16.1544	1.03288	chr2L	5068394	5069125	732	+	322	288	161	281	0.5467	0.5528	0.8994	0.9183
qtc	3_Junction_11526_Junction_11528*5_Junction_11524_Junction_11526	5_Junction_11524_Junction_11526	J002	0.0064764	125.553	3.85121e-29	9.52705e-26	13.0426	8.57639	-2.02644	chr2L	5068394	5070095	1702	+	267	233	18	25	0.4533	0.4472	0.1006	0.0817	-0.215289
TrissinR	3_Junction_12071_Junction_12073*5_Junction_12070_Junction_12071	3_Junction_12071_Junction_12073	J001	0.0117931	4.94828	0.0261167	0.168725	8.92097	7.93389	-0.486855	chr2L	5851826	5852991	1166	+	39	38	31	30	0.4937	0.4872	0.3605	0.3297
TrissinR	3_Junction_12071_Junction_12073*5_Junction_12070_Junction_12071	3_Junction_12071_Junction_12073	J002	0.0116927	4.9619	0.0259116	0.167896	9.03689	9.85469	0.385104	chr2L	5852898	5852991	94	+	40	40	55	61	0.5063	0.5128	0.6395	0.6703
TrissinR	3_Junction_12071_Junction_12073*5_Junction_12070_Junction_12071	5_Junction_12070_Junction_12071	J001	0.0223791	15.6564	7.59546e-05	0.00233473	7.77204	9.65778	0.91838	chr2L	5851826	5852882	1057	+	26	18	74	51	0.4	0.3214	0.7048	0.6296
TrissinR	3_Junction_12071_Junction_12073*5_Junction_12070_Junction_12071	5_Junction_12070_Junction_12071	J002	0.0225191	15.6129	7.77223e-05	0.00237623	9.43592	7.47488	-0.967889	chr2L	5851826	5852991	1166	+	39	38	31	30	0.6	0.6786	0.2952	0.3704	-0.181122
unc-104	3_Junction_18033_Junction_18034*5_Junction_18032_Junction_18033	3_Junction_18033_Junction_18034	J001	0.128268	3.91107	0.0479691	0.249716	13.8275	12.1973	-0.703911	chr2R	12641657	12643390	1734	-	178	188	120	102	0.8018	0.8952	0.7547	0.5604
unc-104	3_Junction_18033_Junction_18034*5_Junction_18032_Junction_18033	3_Junction_18033_Junction_18034	J002	0.128875	3.89456	0.0484426	0.251084	8.28893	9.94939	0.793388	chr2R	12641774	12643390	1617	-	44	22	39	80	0.1982	0.1048	0.2453	0.4396
unc-104	3_Junction_18033_Junction_18034*5_Junction_18032_Junction_18033	5_Junction_18032_Junction_18033	J001	0.106217	3.5036	0.0612355	0.288537	9.19381	10.6851	0.690255	chr2R	12641657	12641746	90	-	53	38	46	101	0.2294	0.1681	0.2771	0.4975
unc-104	3_Junction_18033_Junction_18034*5_Junction_18032_Junction_18033	5_Junction_18032_Junction_18033	J002	0.105845	3.51485	0.0608213	0.287586	13.7362	12.2843	-0.626903	chr2R	12641657	12643390	1734	-	178	188	120	102	0.7706	0.8319	0.7229	0.5025	-0.229774
Hsf	3_Junction_19254_Junction_19255*5_Junction_19253_Junction_19254	3_Junction_19254_Junction_19255	J001	0.150681	4.36584	0.0366664	0.211392	15.2197	12.9322	-0.97537	chr2R	14018550	14018785	236	-	242	134	188	243	0.8996	0.8272	0.5311	0.7666
Hsf	3_Junction_19254_Junction_19255*5_Junction_19253_Junction_19254	3_Junction_19254_Junction_19255	J002	0.150995	4.35735	0.0368497	0.212308	9.01365	11.2979	1.05108	chr2R	14018694	14018785	92	-	27	28	166	74	0.1004	0.1728	0.4689	0.2334
Hsf	3_Junction_19254_Junction_19255*5_Junction_19253_Junction_19254	5_Junction_19253_Junction_19254	J001	0.234279	1.97795	0.159607	0.495012	9.62377	11.812	0.99	chr2R	14018550	14018639	90	-	36	32	211	59	0.1295	0.1928	0.5288	0.1954
Hsf	3_Junction_19254_Junction_19255*5_Junction_19253_Junction_19254	5_Junction_19253_Junction_19254	J002	0.233968	1.98052	0.159336	0.494666	15.1929	12.9581	-0.95283	chr2R	14018550	14018785	236	-	242	134	188	243	0.8705	0.8072	0.4712	0.8046	-0.252572
CG5174	3_Junction_19495_Junction_19498*5_Junction_19494_Junction_19495	3_Junction_19495_Junction_19498	J001	0.135847	13.4942	0.000239303	0.00581616	12.3039	8.65577	-1.66723	chr2R	14311376	14311630	255	+	125	153	28	34	0.7622	0.8138	0.2	0.4533
CG5174	3_Junction_19495_Junction_19498*5_Junction_19494_Junction_19495	3_Junction_19495_Junction_19498	J002	0.136035	13.4774	0.000241449	0.00585081	8.13231	11.7895	1.70022	chr2R	14311512	14311630	119	+	39	35	112	41	0.2378	0.1862	0.8	0.5467
CG5174	3_Junction_19495_Junction_19498*5_Junction_19494_Junction_19495	5_Junction_19494_Junction_19495	J001	0.0516166	13.3013	0.000265222	0.00629289	6.63269	9.04074	1.23395	chr2R	14311376	14311472	97	+	23	32	15	42	0.1554	0.173	0.3488	0.5526
CG5174	3_Junction_19495_Junction_19498*5_Junction_19494_Junction_19495	5_Junction_19494_Junction_19495	J002	0.0506941	13.4705	0.000242343	0.00586748	11.4487	9.42808	-0.921264	chr2R	14311376	14311630	255	+	125	153	28	34	0.8446	0.827	0.6512	0.4474	-0.44633
CG5174	3_Junction_19501_Junction_19502*5_Junction_19500_Junction_19501	3_Junction_19501_Junction_19502	J001	0.1699	1.10626	0.292895	0.670042	16.1708	14.8276	-0.565529	chr2R	14311991	14312375	385	+	324	356	176	388	0.9364	0.8856	0.9119	0.7578
CG5174	3_Junction_19501_Junction_19502*5_Junction_19500_Junction_19501	3_Junction_19501_Junction_19502	J002	0.17075	1.10074	0.294105	0.671496	8.69635	10.0253	0.628265	chr2R	14312171	14312375	205	+	22	46	17	124	0.0636	0.1144	0.0881	0.2422
CG5174	3_Junction_19501_Junction_19502*5_Junction_19500_Junction_19501	5_Junction_19500_Junction_19501	J001	0.00943373	10.5348	0.0011715	0.0192867	9.98348	11.2807	0.587622	chr2R	14311991	14312110	120	+	49	66	60	115	0.1314	0.1564	0.2542	0.2286
CG5174	3_Junction_19501_Junction_19502*5_Junction_19500_Junction_19501	5_Junction_19500_Junction_19501	J002	0.00933631	10.5889	0.0011377	0.0188832	15.8822	15.1414	-0.311825	chr2R	14311991	14312375	385	+	324	356	176	388	0.8686	0.8436	0.7458	0.7714	-0.133232
cora	3_Junction_20165_Junction_20166*5_Junction_20163_Junction_20165	3_Junction_20165_Junction_20166	J001	0.046732	4.89067	0.0270022	0.172201	8.2467	9.3738	0.545584	chr2R	15124568	15125655	1088	+	26	30	45	64	0.5098	0.6977	0.7895	0.8
cora	3_Junction_20165_Junction_20166*5_Junction_20163_Junction_20165	3_Junction_20165_Junction_20166	J002	0.0481712	4.8086	0.0283181	0.177976	7.11915	5.66379	-0.831923	chr2R	15124946	15125655	710	+	25	13	12	16	0.4902	0.3023	0.2105	0.2
cora	3_Junction_20165_Junction_20166*5_Junction_20163_Junction_20165	5_Junction_20163_Junction_20165	J001	0.0778353	4.69297	0.0302863	0.186526	7.31154	5.69647	-0.914135	chr2R	15124568	15124831	264	+	30	13	12	15	0.5357	0.3023	0.2105	0.1899
cora	3_Junction_20165_Junction_20166*5_Junction_20163_Junction_20165	5_Junction_20163_Junction_20165	J002	0.0762652	4.76013	0.0291264	0.181492	8.11686	9.51616	0.677447	chr2R	15124568	15125655	1088	+	26	30	45	64	0.4643	0.6977	0.7895	0.8101	0.234578
zip	3_Junction_24926_Junction_24927*5_Junction_24924_Junction_24926	3_Junction_24926_Junction_24927	J001	0.144023	7.65631	0.00565742	0.0606196	13.0723	10.6452	-1.06935	chr2R	20878795	20879331	537	-	146	150	38	113	0.8639	0.9091	0.4578	0.729
zip	3_Junction_24926_Junction_24927*5_Junction_24924_Junction_24926	3_Junction_24926_Junction_24927	J002	0.145013	7.61153	0.00579962	0.0616096	6.75348	9.21624	1.25068	chr2R	20879221	20879331	111	-	23	15	45	42	0.1361	0.0909	0.5422	0.271
zip	3_Junction_24926_Junction_24927*5_Junction_24924_Junction_24926	5_Junction_24924_Junction_24926	J001	0.107074	3.26267	0.0708736	0.314842	11.9632	13.3061	0.583036	chr2R	20878795	20879086	292	-	164	91	117	153	0.529	0.3776	0.7548	0.5752
zip	3_Junction_24926_Junction_24927*5_Junction_24924_Junction_24926	5_Junction_24924_Junction_24926	J002	0.107131	3.26113	0.0709403	0.314963	12.526	11.1767	-0.593946	chr2R	20878795	20879331	537	-	146	150	38	113	0.471	0.6224	0.2452	0.4248	-0.233746
Nplp1	3_Junction_24970_Junction_24971*5_Junction_24969_Junction_24970	3_Junction_24970_Junction_24971	J001	0.0957183	2.2488	0.133718	0.449825	16.3327	14.8422	-0.627197	chr2R	20925053	20926572	1520	+	339	435	299	159	0.9288	0.9315	0.8038	0.9191
Nplp1	3_Junction_24970_Junction_24971*5_Junction_24969_Junction_24970	3_Junction_24970_Junction_24971	J002	0.0965179	2.23064	0.135298	0.452573	7.92722	9.53436	0.781574	chr2R	20925487	20926572	1086	+	26	32	73	14	0.0712	0.0685	0.1962	0.0809
Nplp1	3_Junction_24970_Junction_24971*5_Junction_24969_Junction_24970	5_Junction_24969_Junction_24970	J001	0.00883975	23.4137	1.30643e-06	7.69062e-05	9.24919	11.2317	0.909289	chr2R	20925053	20925223	171	+	49	50	98	53	0.1263	0.1031	0.2469	0.25
Nplp1	3_Junction_24970_Junction_24971*5_Junction_24969_Junction_24970	5_Junction_24969_Junction_24970	J002	0.00873401	23.5489	1.21779e-06	7.2782e-05	16.0533	15.0222	-0.434001	chr2R	20925053	20926572	1520	+	339	435	299	159	0.8737	0.8969	0.7531	0.75	-0.160262
stmA	3_Junction_27754_Junction_27756*5_Junction_27753_Junction_27754	3_Junction_27754_Junction_27756	J001	0.0435444	14.8775	0.000114726	0.00323297	13.0283	11.0648	-0.861574	chr2R	4619316	4619663	348	-	118	105	107	100	0.8252	0.7447	0.5487	0.4405
stmA	3_Junction_27754_Junction_27756*5_Junction_27753_Junction_27754	3_Junction_27754_Junction_27756	J002	0.0436686	14.8454	0.000116693	0.00327713	8.91548	11.0785	1.00032	chr2R	4619468	4619663	196	-	25	36	88	127	0.1748	0.2553	0.4513	0.5595
stmA	3_Junction_27754_Junction_27756*5_Junction_27753_Junction_27754	5_Junction_27753_Junction_27754	J001	0.103806	4.22863	0.0397476	0.222503	7.14252	8.73311	0.807538	chr2R	4619316	4619425	110	-	13	22	31	66	0.0992	0.1732	0.2246	0.3976
stmA	3_Junction_27754_Junction_27756*5_Junction_27753_Junction_27754	5_Junction_27753_Junction_27754	J002	0.102985	4.25656	0.0390991	0.220325	12.7929	11.3061	-0.652089	chr2R	4619316	4619663	348	-	118	105	107	100	0.9008	0.8268	0.7754	0.6024	-0.292917
shrb	3_Junction_28297_Junction_28300*5_Junction_28296_Junction_28297	3_Junction_28297_Junction_28300	J001	0.0263136	12.4004	0.000429238	0.00898541	11.3731	12.7561	0.606392	chr2R	5030741	5031123	383	-	80	113	50	215	0.5031	0.6011	0.8065	0.7624
shrb	3_Junction_28297_Junction_28300*5_Junction_28296_Junction_28297	3_Junction_28297_Junction_28300	J002	0.026478	12.3534	0.000440193	0.00913075	10.6121	8.94898	-0.774266	chr2R	5030900	5031123	224	-	79	75	12	67	0.4969	0.3989	0.1935	0.2376
shrb	3_Junction_28297_Junction_28300*5_Junction_28296_Junction_28297	5_Junction_28296_Junction_28297	J001	0.0721104	2.91771	0.0876124	0.354872	10.8987	9.61054	-0.590025	chr2R	5030741	5030896	156	-	86	80	32	65	0.5181	0.4145	0.3902	0.2321
shrb	3_Junction_28297_Junction_28300*5_Junction_28296_Junction_28297	5_Junction_28296_Junction_28297	J002	0.0719179	2.92487	0.0872244	0.354109	11.4297	12.6665	0.542369	chr2R	5030741	5031123	383	-	80	113	50	215	0.4819	0.5855	0.6098	0.7679	0.20167
CG1648	3_Junction_28955_Junction_28958*5_Junction_28954_Junction_28955	3_Junction_28955_Junction_28958	J001	0.00994945	28.7134	8.39201e-08	7.15916e-06	16.8282	15.3651	-0.613678	chr2R	5700169	5707343	7175	-	198	223	674	508	0.8285	0.8383	0.6247	0.6675
CG1648	3_Junction_28955_Junction_28958*5_Junction_28954_Junction_28955	3_Junction_28955_Junction_28958	J002	0.00996789	28.6823	8.52785e-08	7.2636e-06	11.3749	13.4026	0.884373	chr2R	5706513	5707343	831	-	41	43	405	253	0.1715	0.1617	0.3753	0.3325
CG1648	3_Junction_28955_Junction_28958*5_Junction_28954_Junction_28955	5_Junction_28954_Junction_28955	J001	0.00532607	28.1733	1.10923e-07	9.0678e-06	11.5155	13.2507	0.756676	chr2R	5700169	5706500	6332	-	39	54	344	262	0.1646	0.1949	0.3379	0.3403
CG1648	3_Junction_28955_Junction_28958*5_Junction_28954_Junction_28955	5_Junction_28954_Junction_28955	J002	0.00530834	28.214	1.08617e-07	8.93062e-06	16.6163	15.5502	-0.447195	chr2R	5700169	5707343	7175	-	198	223	674	508	0.8354	0.8051	0.6621	0.6597	-0.21944
CG2269	3_Junction_29589_Junction_29590*5_Junction_29588_Junction_29589	3_Junction_29589_Junction_29590	J001	0.186345	0.389333	0.53265	0.870642	12.4241	12.7535	0.143082	chr2R	5978304	5980647	2344	+	136	157	88	139	0.208	0.2069	0.1618	0.4399
CG2269	3_Junction_29589_Junction_29590*5_Junction_29588_Junction_29589	3_Junction_29589_Junction_29590	J002	0.186074	0.38989	0.532357	0.870613	16.9828	16.6507	-0.138737	chr2R	5979501	5980647	1147	+	518	602	456	177	0.792	0.7931	0.8382	0.5601
CG2269	3_Junction_29589_Junction_29590*5_Junction_29588_Junction_29589	5_Junction_29588_Junction_29589	J001	0.0735187	7.78615	0.00526482	0.0578266	15.5417	13.7671	-0.752274	chr2R	5978304	5979260	957	+	438	485	136	93	0.7631	0.7555	0.6071	0.4009
CG2269	3_Junction_29589_Junction_29590*5_Junction_29588_Junction_29589	5_Junction_29588_Junction_29589	J002	0.0736348	7.7748	0.00529801	0.0580811	11.6879	13.5021	0.788419	chr2R	5978304	5980647	2344	+	136	157	88	139	0.2369	0.2445	0.3929	0.5991	0.109259
CG41378	3_Junction_33829_Junction_33895*5_Junction_33826_Junction_33829	3_Junction_33829_Junction_33895	J001	0.188152	12.6238	0.000380868	0.00828057	12.59	8.3154	-1.95905	chr2RHet	1545716	1621472	75757	-	87	75	53	49	0.8788	0.8523	0.2208	0.5326
CG41378	3_Junction_33829_Junction_33895*5_Junction_33826_Junction_33829	3_Junction_33829_Junction_33895	J002	0.188058	12.6295	0.000379708	0.00826166	6.90968	11.1396	2.04893	chr2RHet	1606048	1621472	15425	-	12	13	187	43	0.1212	0.1477	0.7792	0.4674
CG41378	3_Junction_33829_Junction_33895*5_Junction_33826_Junction_33829	5_Junction_33826_Junction_33829	J001	0.0165831	0.258329	0.611271	0.916187	12.6994	12.8571	0.0683084	chr2RHet	1545716	1605711	59996	-	146	174	111	116	0.6266	0.6988	0.6768	0.703
CG41378	3_Junction_33829_Junction_33895*5_Junction_33826_Junction_33829	5_Junction_33826_Junction_33829	J002	0.016685	0.257403	0.61191	0.916399	10.454	10.2522	-0.0920768	chr2RHet	1545716	1621472	75757	-	87	75	53	49	0.3734	0.3012	0.3232	0.297	-0.127394
CG5946	3_Junction_35834_Junction_35836*5_Junction_35832_Junction_35834	3_Junction_35834_Junction_35836	J001	0.0156321	16.6408	4.51691e-05	0.00151176	17.8256	16.6049	-0.509112	chr3L	11810416	11811186	771	-	735	758	204	495	0.8429	0.8653	0.6846	0.7444
CG5946	3_Junction_35834_Junction_35836*5_Junction_35832_Junction_35834	3_Junction_35834_Junction_35836	J002	0.0156908	16.5952	4.62691e-05	0.00154132	11.8025	13.3688	0.680686	chr3L	11810752	11811186	435	-	137	118	94	170	0.1571	0.1347	0.3154	0.2556
CG5946	3_Junction_35834_Junction_35836*5_Junction_35832_Junction_35834	5_Junction_35832_Junction_35834	J001	0.0234158	36.9183	1.23183e-09	1.75212e-07	15.2044	17.5914	0.999743	chr3L	11810416	11810487	72	-	309	287	404	658	0.296	0.2746	0.6645	0.5707
CG5946	3_Junction_35834_Junction_35836*5_Junction_35832_Junction_35834	5_Junction_35832_Junction_35834	J002	0.0234101	36.9263	1.22678e-09	1.74937e-07	18.3868	16.0409	-0.978647	chr3L	11810416	11811186	771	-	735	758	204	495	0.704	0.7254	0.3355	0.4293	-0.304684
Nc73EF	3_Junction_39641_Junction_39642*5_Junction_39640_Junction_39641	3_Junction_39641_Junction_39642	J001	0.0355025	2.34531	0.12566	0.435452	14.2708	13.4062	-0.369378	chr3L	16958078	16960480	2403	+	301	220	71	215	0.7798	0.7383	0.732	0.6143
Nc73EF	3_Junction_39641_Junction_39642*5_Junction_39640_Junction_39641	3_Junction_39641_Junction_39642	J002	0.0357009	2.33311	0.126649	0.437246	10.4613	11.4407	0.439811	chr3L	16959458	16960480	1023	+	85	78	26	135	0.2202	0.2617	0.268	0.3857
Nc73EF	3_Junction_39641_Junction_39642*5_Junction_39640_Junction_39641	5_Junction_39640_Junction_39641	J001	0.00511098	28.8144	7.96587e-08	6.89854e-06	12.8989	14.2672	0.586409	chr3L	16958078	16959166	1089	+	189	131	94	297	0.3857	0.3732	0.5697	0.5801
Nc73EF	3_Junction_39641_Junction_39642*5_Junction_39640_Junction_39641	5_Junction_39640_Junction_39641	J002	0.00510762	28.8237	7.92748e-08	6.88626e-06	14.5427	13.2335	-0.559066	chr3L	16958078	16960480	2403	+	301	220	71	215	0.6143	0.6268	0.4303	0.4199	-0.166134
CG42674	3_Junction_41976_Junction_41982*5_Junction_41973_Junction_41976	3_Junction_41976_Junction_41982	J001	0.0181293	13.7393	0.000210014	0.00524085	9.67644	11.3008	0.73907	chr3L	20162163	20178061	15899	-	18	18	363	86	0.5294	0.4286	0.7304	0.7748
CG42674	3_Junction_41976_Junction_41982*5_Junction_41973_Junction_41976	3_Junction_41976_Junction_41982	J002	0.0183408	13.6837	0.000216324	0.00538181	10.0171	8.04171	-0.948263	chr3L	20175769	20178061	2293	-	16	24	134	25	0.4706	0.5714	0.2696	0.2252
CG42674	3_Junction_41976_Junction_41982*5_Junction_41973_Junction_41976	5_Junction_41973_Junction_41976	J001	0.0381816	0.494899	0.48175	0.835802	11.5958	11.0092	-0.261126	chr3L	20162163	20175724	13562	-	32	24	359	130	0.64	0.5714	0.4972	0.6019
CG42674	3_Junction_41976_Junction_41982*5_Junction_41973_Junction_41976	5_Junction_41973_Junction_41976	J002	0.0381941	0.49478	0.481803	0.835816	10.1947	10.8077	0.278576	chr3L	20162163	20178061	15899	-	18	18	363	86	0.36	0.4286	0.5028	0.3981	0.117729
CG10508	3_Junction_42898_Junction_42901*5_Junction_42897_Junction_42898	3_Junction_42898_Junction_42901	J001	0.138859	1.62941	0.201784	0.558465	11.7567	12.7819	0.447724	chr3L	21207476	21208471	996	+	137	72	103	167	0.3806	0.2236	0.3527	0.5719
CG10508	3_Junction_42898_Junction_42901*5_Junction_42897_Junction_42898	3_Junction_42898_Junction_42901	J002	0.138718	1.63098	0.201567	0.558061	14.5777	13.554	-0.436314	chr3L	21208212	21208471	260	+	223	250	189	125	0.6194	0.7764	0.6473	0.4281
CG10508	3_Junction_42898_Junction_42901*5_Junction_42897_Junction_42898	5_Junction_42897_Junction_42898	J001	0.124163	5.93147	0.0148728	0.11753	11.103	8.97917	-0.980655	chr3L	21207476	21207710	235	+	77	117	31	37	0.3598	0.619	0.2313	0.1814
CG10508	3_Junction_42898_Junction_42901*5_Junction_42897_Junction_42898	5_Junction_42897_Junction_42898	J002	0.123898	5.94297	0.0147761	0.117026	11.2265	13.3274	0.918121	chr3L	21207476	21208471	996	+	137	72	103	167	0.6402	0.381	0.7687	0.8186	0.174487
Eip63E	3_Junction_46153_Junction_46155*5_Junction_46152_Junction_46153	3_Junction_46153_Junction_46155	J001	0.412287	2.98397	0.0840929	0.34756	7.98788	6.0225	-1.06691	chr3L	3578480	3593327	14848	+	34	15	22	10	0.9714	0.6522	0.55	0.4167
Eip63E	3_Junction_46153_Junction_46155*5_Junction_46152_Junction_46153	3_Junction_46153_Junction_46155	J002	0.417229	2.95719	0.0854962	0.35066	4.10882	5.92592	1.22852	chr3L	3588080	3593327	5248	+	1	8	18	14	0.0286	0.3478	0.45	0.5833
Eip63E	3_Junction_46153_Junction_46155*5_Junction_46152_Junction_46153	5_Junction_46152_Junction_46153	J001	0.147063	4.26238	0.0389652	0.219996	4.07115	5.74059	1.14618	chr3L	3578480	3588040	9561	+	4	6	13	15	0.1053	0.2857	0.3714	0.6
Eip63E	3_Junction_46153_Junction_46155*5_Junction_46152_Junction_46153	5_Junction_46152_Junction_46153	J002	0.143432	4.33163	0.0374103	0.214203	7.73434	6.20861	-0.828904	chr3L	3578480	3593327	14848	+	34	15	22	10	0.8947	0.7143	0.6286	0.4	-0.358766
lark	3_Junction_49427_Junction_49429*5_Junction_49425_Junction_49427	3_Junction_49427_Junction_49429	J001	0.189213	1.70449	0.191702	0.544819	11.0027	12.5398	0.677828	chr3L	7332717	7333974	1258	+	66	72	173	94	0.3626	0.4286	0.7555	0.4332
lark	3_Junction_49427_Junction_49429*5_Junction_49425_Junction_49427	3_Junction_49427_Junction_49429	J002	0.18928	1.70392	0.191777	0.544895	12.3733	10.8369	-0.679859	chr3L	7333870	7333974	105	+	116	96	56	123	0.6374	0.5714	0.2445	0.5668
lark	3_Junction_49427_Junction_49429*5_Junction_49425_Junction_49427	5_Junction_49425_Junction_49427	J001	0.00884434	12.3029	0.000452255	0.00929959	10.4439	8.96959	-0.687999	chr3L	7332717	7332966	250	+	53	57	61	37	0.4454	0.4419	0.2607	0.2824
lark	3_Junction_49427_Junction_49429*5_Junction_49425_Junction_49427	5_Junction_49425_Junction_49427	J002	0.00876433	12.3457	0.000442009	0.00916174	11.1719	12.2271	0.465829	chr3L	7332717	7333974	1258	+	66	72	173	94	0.5546	0.5581	0.7393	0.7176	0.18289
Rbp	3_Junction_54406_Junction_54407*5_Junction_54405_Junction_54406	3_Junction_54406_Junction_54407	J001	0.00978437	9.33824	0.00224421	0.0312785	10.7616	11.7442	0.43803	chr3R	11219220	11224833	5614	+	90	60	113	78	0.5028	0.4724	0.6348	0.6724
Rbp	3_Junction_54406_Junction_54407*5_Junction_54405_Junction_54406	3_Junction_54406_Junction_54407	J002	0.00982127	9.32425	0.00226141	0.031437	10.8931	9.75542	-0.519918	chr3R	11222099	11224833	2735	+	89	67	65	38	0.4972	0.5276	0.3652	0.3276
Rbp	3_Junction_54406_Junction_54407*5_Junction_54405_Junction_54406	5_Junction_54405_Junction_54406	J001	0.337088	2.92482	0.0872268	0.354109	11.1148	8.879	-1.03414	chr3R	11219220	11222030	2811	+	116	85	11	62	0.5631	0.5862	0.0887	0.4429
Rbp	3_Junction_54406_Junction_54407*5_Junction_54405_Junction_54406	5_Junction_54405_Junction_54406	J002	0.336761	2.92745	0.0870851	0.353819	10.1716	12.4502	1.01565	chr3R	11219220	11224833	5614	+	90	60	113	78	0.4369	0.4138	0.9113	0.5571	0.223991
Sap47	3_Junction_54751_Junction_54761*5_Junction_54749_Junction_54751	3_Junction_54751_Junction_54761	J001	0.0610294	17.5334	2.823e-05	0.00102046	19.8555	22.5101	1.09617	chr3R	11780927	11783311	2385	+	1019	1127	2480	1797	0.7743	0.8442	0.9635	0.9379
Sap47	3_Junction_54751_Junction_54761*5_Junction_54749_Junction_54751	3_Junction_54751_Junction_54761	J002	0.0611397	17.5034	2.86791e-05	0.00103284	14.7976	12.013	-1.19704	chr3R	11782898	11783311	414	+	297	208	94	119	0.2257	0.1558	0.0365	0.0621
Sap47	3_Junction_54751_Junction_54761*5_Junction_54749_Junction_54751	5_Junction_54749_Junction_54751	J001	0.0586764	0.612742	0.433757	0.802761	18.5683	17.9879	-0.241122	chr3R	11780927	11782585	1659	+	528	574	688	990	0.3413	0.3374	0.2172	0.3552
Sap47	3_Junction_54751_Junction_54761*5_Junction_54749_Junction_54751	5_Junction_54749_Junction_54751	J002	0.05866	0.612909	0.433695	0.802761	20.8938	21.4694	0.237669	chr3R	11780927	11783311	2385	+	1019	1127	2480	1797	0.6587	0.6626	0.7828	0.6448	0.117841
CG31550	3_Junction_55657_Junction_55659*5_Junction_55655_Junction_55657	3_Junction_55657_Junction_55659	J001	0.0614878	12.815	0.000343854	0.00768546	9.64292	7.47543	-1.0647	chr3R	1312606	1313555	950	+	46	23	31	44	0.902	0.7419	0.5167	0.44
CG31550	3_Junction_55657_Junction_55659*5_Junction_55655_Junction_55657	3_Junction_55657_Junction_55659	J002	0.0621323	12.7354	0.000358791	0.00792782	5.20026	7.76857	1.46534	chr3R	1312899	1313555	657	+	5	8	29	56	0.098	0.2581	0.4833	0.56
CG31550	3_Junction_55657_Junction_55659*5_Junction_55655_Junction_55657	5_Junction_55655_Junction_55657	J001	0.0984871	1.0218	0.312093	0.691154	7.62392	8.39141	0.387368	chr3R	1312606	1312771	166	+	17	26	32	50	0.2698	0.5306	0.5079	0.5319
CG31550	3_Junction_55657_Junction_55659*5_Junction_55655_Junction_55657	5_Junction_55655_Junction_55657	J002	0.0983252	1.02313	0.311778	0.6909	8.90822	8.15304	-0.370392	chr3R	1312606	1313555	950	+	46	23	31	44	0.7302	0.4694	0.4921	0.4681	-0.224845
CASK	3_Junction_60336_Junction_60338*5_Junction_60335_Junction_60336	3_Junction_60336_Junction_60338	J001	0.0202578	2.90016	0.0885708	0.356514	14.48	13.7861	-0.29553	chr3R	17613824	17615169	1346	-	369	284	55	218	0.6554	0.7172	0.6322	0.5677
CASK	3_Junction_60336_Junction_60338*5_Junction_60335_Junction_60336	3_Junction_60336_Junction_60338	J002	0.020313	2.89378	0.0889221	0.357326	11.9177	12.6935	0.338584	chr3R	17614649	17615169	521	-	194	112	32	166	0.3446	0.2828	0.3678	0.4323
CASK	3_Junction_60336_Junction_60338*5_Junction_60335_Junction_60336	5_Junction_60335_Junction_60336	J001	0.0720994	7.42273	0.00644052	0.0662651	14.5386	16.201	0.700634	chr3R	17613824	17614594	771	-	305	271	220	390	0.4525	0.4883	0.8	0.6414
CASK	3_Junction_60336_Junction_60338*5_Junction_60335_Junction_60336	5_Junction_60335_Junction_60336	J002	0.0721286	7.41998	0.00645034	0.0663422	14.9485	13.2697	-0.715347	chr3R	17613824	17615169	1346	-	369	284	55	218	0.5475	0.5117	0.2	0.3586	-0.195048
Nf1	3_Junction_64842_Junction_64844*5_Junction_64841_Junction_64842	3_Junction_64842_Junction_64844	J001	0.0448611	7.34593	0.00672148	0.0683925	11.0944	9.61043	-0.677837	chr3R	21817567	21818528	962	+	147	138	14	47	0.5465	0.575	0.2333	0.4052
Nf1	3_Junction_64842_Junction_64844*5_Junction_64841_Junction_64842	3_Junction_64842_Junction_64844	J002	0.04486	7.34604	0.00672106	0.0683925	10.3136	11.75	0.643916	chr3R	21818211	21818528	318	+	122	102	46	69	0.4535	0.425	0.7667	0.5948
Nf1	3_Junction_64842_Junction_64844*5_Junction_64841_Junction_64842	5_Junction_64841_Junction_64842	J001	0.105629	3.96829	0.0463649	0.244695	11.816	13.335	0.660221	chr3R	21817567	21818120	554	+	179	175	87	94	0.5491	0.5591	0.8614	0.6667
Nf1	3_Junction_64842_Junction_64844*5_Junction_64841_Junction_64842	5_Junction_64841_Junction_64842	J002	0.105822	3.96232	0.0465295	0.245265	11.1061	9.55826	-0.707477	chr3R	21817567	21818528	962	+	147	138	14	47	0.4509	0.4409	0.1386	0.3333	-0.170804
tau	3_Junction_65995_Junction_65997*5_Junction_65994_Junction_65995	3_Junction_65995_Junction_65997	J001	0.0129341	29.3746	5.96553e-08	5.32007e-06	16.3187	15.1049	-0.510317	chr3R	23469695	23470945	1251	-	409	307	188	423	0.9512	0.9564	0.821	0.8528
tau	3_Junction_65995_Junction_65997*5_Junction_65994_Junction_65995	3_Junction_65995_Junction_65997	J002	0.0132398	29.0851	6.92668e-08	6.10073e-06	6.76668	9.65872	1.45178	chr3R	23470144	23470945	802	-	21	14	41	73	0.0488	0.0436	0.179	0.1472
tau	3_Junction_65995_Junction_65997*5_Junction_65994_Junction_65995	5_Junction_65994_Junction_65995	J001	0.0168881	32.6785	1.08732e-08	1.21305e-06	5.88828	9.23952	1.7586	chr3R	23469695	23470125	431	-	14	10	38	64	0.0331	0.0315	0.1681	0.1314
tau	3_Junction_65995_Junction_65997*5_Junction_65994_Junction_65995	5_Junction_65994_Junction_65995	J002	0.01645	33.0538	8.96454e-09	1.02011e-06	16.412	15.0068	-0.590799	chr3R	23469695	23470945	1251	-	409	307	188	423	0.9669	0.9685	0.8319	0.8686	-0.194593
CG1607	3_Junction_69242_Junction_69243*5_Junction_69241_Junction_69242	3_Junction_69242_Junction_69243	J001	0.0650167	1.32964	0.24887	0.619096	10.3788	9.71352	-0.306595	chr3R	27215920	27216309	390	+	99	86	43	28	0.3852	0.4503	0.3981	0.2314
CG1607	3_Junction_69242_Junction_69243*5_Junction_69241_Junction_69242	3_Junction_69242_Junction_69243	J002	0.0648224	1.33281	0.248307	0.61837	11.4797	12.1123	0.2787	chr3R	27216081	27216309	229	+	158	105	65	93	0.6148	0.5497	0.6019	0.7686
CG1607	3_Junction_69242_Junction_69243*5_Junction_69241_Junction_69242	5_Junction_69241_Junction_69242	J001	0.00986934	20.4887	5.99832e-06	0.000279201	10.4328	11.9258	0.666969	chr3R	27215920	27216018	99	+	79	80	106	64	0.4438	0.4819	0.7114	0.6957
CG1607	3_Junction_69242_Junction_69243*5_Junction_69241_Junction_69242	5_Junction_69241_Junction_69242	J002	0.0099077	20.4565	6.1003e-06	0.000282975	10.9078	9.10345	-0.833698	chr3R	27215920	27216309	390	+	99	86	43	28	0.5562	0.5181	0.2886	0.3043	-0.12985
CG8481	3_Junction_72313_Junction_72315*5_Junction_72312_Junction_72313	3_Junction_72313_Junction_72315	J001	0.0152492	5.78426	0.0161703	0.124088	10.7325	10.0141	-0.327716	chr3R	5593862	5594643	782	+	62	80	39	82	0.8611	0.8602	0.75	0.7257
CG8481	3_Junction_72313_Junction_72315*5_Junction_72312_Junction_72313	3_Junction_72313_Junction_72315	J002	0.0159545	5.70403	0.016926	0.127859	5.5843	7.06756	0.853398	chr3R	5594560	5594643	84	+	10	13	13	31	0.1389	0.1398	0.25	0.2743
CG8481	3_Junction_72313_Junction_72315*5_Junction_72312_Junction_72313	5_Junction_72312_Junction_72313	J001	0.35148	1.67088	0.196141	0.550801	7.42456	9.68686	1.11181	chr3R	5593862	5594465	604	+	19	18	95	25	0.2346	0.1837	0.709	0.2336
CG8481	3_Junction_72313_Junction_72315*5_Junction_72312_Junction_72313	5_Junction_72312_Junction_72313	J002	0.350945	1.67333	0.195813	0.550547	11.5504	9.20368	-1.0725	chr3R	5593862	5594643	782	+	62	80	39	82	0.7654	0.8163	0.291	0.7664	-0.271265
CG4848	3_Junction_74645_Junction_74646*5_Junction_74644_Junction_74645	3_Junction_74645_Junction_74646	J001	0.072383	6.68826	0.00970499	0.0883496	9.34342	11.0026	0.762279	chr3R	8041675	8042601	927	-	58	50	65	70	0.4715	0.6329	0.7471	0.8434
CG4848	3_Junction_74645_Junction_74646*5_Junction_74644_Junction_74645	3_Junction_74645_Junction_74646	J002	0.0729669	6.64819	0.00992566	0.0897838	8.86881	7.04687	-0.924518	chr3R	8042408	8042601	194	-	65	29	22	13	0.5285	0.3671	0.2529	0.1566
CG4848	3_Junction_74645_Junction_74646*5_Junction_74644_Junction_74645	5_Junction_74644_Junction_74645	J001	0.0242377	0.0737931	0.785892	0.991309	7.4747	7.28769	-0.0982366	chr3R	8041675	8042353	679	-	29	16	21	30	0.3333	0.2424	0.2442	0.3
CG4848	3_Junction_74645_Junction_74646*5_Junction_74644_Junction_74645	5_Junction_74644_Junction_74645	J002	0.0236353	0.0748857	0.784352	0.991188	10.0878	10.2168	0.0592524	chr3R	8041675	8042601	927	-	58	50	65	70	0.6667	0.7576	0.7558	0.7	0.156713
Caps	3_Junction_77149_Junction_77151*5_Junction_77148_Junction_77149	3_Junction_77149_Junction_77151	J001	0.0711874	0.528307	0.46732	0.824354	9.12504	9.50054	0.177706	chr4	1254609	1259566	4958	+	28	34	53	86	0.4444	0.5574	0.6709	0.5
Caps	3_Junction_77149_Junction_77151*5_Junction_77148_Junction_77149	3_Junction_77149_Junction_77151	J002	0.0713347	0.527653	0.467595	0.824507	9.08948	8.70721	-0.184155	chr4	1257938	1259566	1629	+	35	27	26	86	0.5556	0.4426	0.3291	0.5
Caps	3_Junction_77149_Junction_77151*5_Junction_77148_Junction_77149	5_Junction_77148_Junction_77149	J001	0.0197589	4.06209	0.0438563	0.236834	9.16116	8.1733	-0.481372	chr4	1254609	1257730	3122	+	24	44	35	46	0.4615	0.5641	0.3977	0.3485
Caps	3_Junction_77149_Junction_77151*5_Junction_77148_Junction_77149	5_Junction_77148_Junction_77149	J002	0.0196295	4.07523	0.0435162	0.235733	8.86412	9.76365	0.425845	chr4	1254609	1259566	4958	+	28	34	53	86	0.5385	0.4359	0.6023	0.6515	0.10688
CaMKI	3_Junction_78569_Junction_78573*5_Junction_78566_Junction_78569	3_Junction_78569_Junction_78573	J001	0.0052239	29.9099	4.52606e-08	4.1873e-06	15.7321	14.5659	-0.492257	chr4	467861	470866	3006	+	411	343	125	287	0.7111	0.7206	0.5165	0.5456
CaMKI	3_Junction_78569_Junction_78573*5_Junction_78566_Junction_78569	3_Junction_78569_Junction_78573	J002	0.00523731	29.8713	4.61704e-08	4.25763e-06	12.6107	14.0907	0.636122	chr4	470594	470866	273	+	167	133	117	239	0.2889	0.2794	0.4835	0.4544
CaMKI	3_Junction_78569_Junction_78573*5_Junction_78566_Junction_78569	5_Junction_78566_Junction_78569	J001	0.00466708	60.4015	7.73525e-15	3.72977e-12	11.7411	13.9371	0.95101	chr4	467861	470548	2688	+	117	100	111	251	0.2216	0.2257	0.4703	0.4665
CaMKI	3_Junction_78569_Junction_78573*5_Junction_78566_Junction_78569	5_Junction_78566_Junction_78569	J002	0.00465157	60.4961	7.37246e-15	3.58522e-12	15.9349	14.3693	-0.660918	chr4	467861	470866	3006	+	411	343	125	287	0.7784	0.7743	0.5297	0.5335	-0.231688
CG8671	3_Junction_8446_Junction_8452*5_Junction_8445_Junction_8446	3_Junction_8446_Junction_8452	J001	0.0556251	10.6302	0.00111254	0.0185794	6.27561	8.61329	1.22964	chr2L	21275806	21281130	5325	+	10	13	18	89	0.1099	0.2281	0.3913	0.4684
CG8671	3_Junction_8446_Junction_8452*5_Junction_8445_Junction_8446	3_Junction_8446_Junction_8452	J002	0.0549788	10.7156	0.00106234	0.0178935	11.1634	9.20937	-0.89772	chr2L	21280447	21281130	684	+	81	44	28	101	0.8901	0.7719	0.6087	0.5316
CG8671	3_Junction_8446_Junction_8452*5_Junction_8445_Junction_8446	5_Junction_8445_Junction_8446	J001	0.200539	5.75294	0.0164611	0.125615	9.65597	7.02082	-1.31195	chr2L	21275806	21279882	4077	+	39	42	25	27	0.7959	0.7636	0.5814	0.2328
CG8671	3_Junction_8446_Junction_8452*5_Junction_8445_Junction_8446	5_Junction_8445_Junction_8446	J002	0.200689	5.74912	0.0164969	0.125787	6.12998	8.748	1.3797	chr2L	21275806	21281130	5325	+	10	13	18	89	0.2041	0.2364	0.4186	0.7672	0.227712
Ranbp16	3_Junction_88815_Junction_88820*5_Junction_88814_Junction_88815	3_Junction_88815_Junction_88820	J001	0.0589277	15.0167	0.000106562	0.0030443	11.1903	13.4784	0.999054	chrX	15822963	15823372	410	-	68	131	125	149	0.2709	0.4081	0.7267	0.645
Ranbp16	3_Junction_88815_Junction_88820*5_Junction_88814_Junction_88815	3_Junction_88815_Junction_88820	J002	0.0589258	15.0171	0.000106539	0.0030443	13.2003	10.8979	-1.01053	chrX	15823291	15823372	82	-	183	190	47	82	0.7291	0.5919	0.2733	0.355
Ranbp16	3_Junction_88815_Junction_88820*5_Junction_88814_Junction_88815	5_Junction_88814_Junction_88815	J001	0.0540923	4.42497	0.0354168	0.206824	13.0878	11.9521	-0.493956	chrX	15822963	15823204	242	-	155	149	92	115	0.6951	0.5321	0.424	0.4356
Ranbp16	3_Junction_88815_Junction_88820*5_Junction_88814_Junction_88815	5_Junction_88814_Junction_88815	J002	0.0541009	4.42436	0.0354293	0.206824	11.7545	12.8956	0.497918	chrX	15822963	15823372	410	-	68	131	125	149	0.3049	0.4679	0.576	0.5644	0.228955
mmd	3_Junction_88906_Junction_88912*5_Junction_88905_Junction_88906	3_Junction_88906_Junction_88912	J001	0.0851602	13.5527	0.000231957	0.00568865	12.1798	9.53144	-1.19464	chrX	15843909	15845181	1273	-	124	74	54	60	0.7949	0.6016	0.3214	0.3
mmd	3_Junction_88906_Junction_88912*5_Junction_88905_Junction_88906	3_Junction_88906_Junction_88912	J002	0.0851109	13.5595	0.00023112	0.00567301	9.41783	12.0698	1.19991	chrX	15844418	15845181	764	-	32	49	114	140	0.2051	0.3984	0.6786	0.7
mmd	3_Junction_88906_Junction_88912*5_Junction_88905_Junction_88906	5_Junction_88905_Junction_88906	J001	0.153158	2.27577	0.13141	0.4455	8.71426	10.2182	0.708239	chrX	15843909	15844386	478	-	34	43	31	98	0.2152	0.3675	0.3647	0.6203
mmd	3_Junction_88906_Junction_88912*5_Junction_88905_Junction_88906	5_Junction_88905_Junction_88906	J002	0.152828	2.28038	0.13102	0.444946	11.5927	10.0909	-0.676541	chrX	15843909	15845181	1273	-	124	74	54	60	0.7848	0.6325	0.6353	0.3797	-0.312858
Nup153	3_Junction_90033_Junction_90035*5_Junction_90032_Junction_90033	3_Junction_90033_Junction_90035	J001	0.0203771	0.858369	0.354196	0.732996	7.7417	8.11395	0.188706	chrX	16500041	16501964	1924	+	41	39	18	24	0.6949	0.65	0.7826	0.7273
Nup153	3_Junction_90033_Junction_90035*5_Junction_90032_Junction_90033	3_Junction_90033_Junction_90035	J002	0.0213104	0.849602	0.356665	0.734862	5.86738	5.27442	-0.369283	chrX	16501032	16501964	933	+	18	21	5	9	0.3051	0.35	0.2174	0.2727
Nup153	3_Junction_90033_Junction_90035*5_Junction_90032_Junction_90033	5_Junction_90032_Junction_90033	J001	0.0219511	12.1941	0.000479407	0.00974868	5.92785	3.23319	-1.98277	chrX	16500041	16500893	853	+	24	23	1	3	0.3692	0.371	0.0526	0.1111
Nup153	3_Junction_90033_Junction_90035*5_Junction_90032_Junction_90033	5_Junction_90032_Junction_90033	J002	0.0208037	12.3187	0.000448432	0.009241	7.29958	8.57882	0.6489	chrX	16500041	16501964	1924	+	41	39	18	24	0.6308	0.629	0.9474	0.8889	0.226406
RhoGAPp190	3_Junction_91077_Junction_91079*5_Junction_91076_Junction_91077	3_Junction_91077_Junction_91079	J001	0.0772171	5.36137	0.0205876	0.14526	7.11176	8.58653	0.752598	chrX	17538841	17540551	1711	-	73	30	14	17	0.6134	0.4688	0.9333	0.7391
RhoGAPp190	3_Junction_91077_Junction_91079*5_Junction_91076_Junction_91077	3_Junction_91077_Junction_91079	J002	0.0782543	5.33156	0.0209426	0.146836	6.49179	4.73068	-1.09799	chrX	17540045	17540551	507	-	46	34	1	6	0.3866	0.5312	0.0667	0.2609
RhoGAPp190	3_Junction_91077_Junction_91079*5_Junction_91076_Junction_91077	5_Junction_91076_Junction_91077	J001	0.0832339	2.17754	0.140038	0.460787	5.11733	3.93997	-0.855593	chrX	17538841	17539918	1078	-	21	19	3	2	0.2234	0.3878	0.1765	0.1053
RhoGAPp190	3_Junction_91077_Junction_91079*5_Junction_91076_Junction_91077	5_Junction_91076_Junction_91077	J002	0.0801002	2.21039	0.137084	0.456025	7.40711	8.26898	0.43955	chrX	17538841	17540551	1711	-	73	30	14	17	0.7766	0.6122	0.8235	0.8947	0.287452
Ntf-2	3_Junction_94827_Junction_94829*5_Junction_94826_Junction_94827	3_Junction_94827_Junction_94829	J001	0.102551	1.03234	0.309611	0.688579	14.0393	14.9126	0.370672	chrX	20907664	20909771	2108	+	242	188	134	371	0.6127	0.6573	0.6321	0.8208
Ntf-2	3_Junction_94827_Junction_94829*5_Junction_94826_Junction_94827	3_Junction_94827_Junction_94829	J002	0.102732	1.03058	0.310022	0.689062	12.2163	11.3298	-0.390751	chrX	20909021	20909771	751	+	153	98	78	81	0.3873	0.3427	0.3679	0.1792
Ntf-2	3_Junction_94827_Junction_94829*5_Junction_94826_Junction_94827	5_Junction_94826_Junction_94827	J001	0.0093782	12.6456	0.000376442	0.0082189	9.37331	7.65085	-0.847077	chrX	20907664	20908635	972	+	57	42	14	37	0.1906	0.1826	0.0946	0.0907
Ntf-2	3_Junction_94827_Junction_94829*5_Junction_94826_Junction_94827	5_Junction_94826_Junction_94827	J002	0.00916299	12.7592	0.000354269	0.00786762	14.1492	14.86	0.301645	chrX	20907664	20909771	2108	+	242	188	134	371	0.8094	0.8174	0.9054	0.9093	0.121521

## Sheet: AS A5SS events
Gene	AS_event_ID	AS_structure_ID	sub_junction_ID	sub-junction_dispersion_estimate	LRT_statistic-full_vs_reduced	LRT_p_value-full_vs_reduced	BH_adjusted_p-values	DN1	LNd	fitting_parameter_log2fold_change_LNd_DN1	sub_junction_chr	sub_junction_start_coor	sub_junction_end_coor	sub_junction_size	sub_junction_strand	raw_count.DN1_A	raw_count.DN1_B	raw_count.LNd_A	raw_count.LNd_B	percentage_usage.DN1_A	percentage_usage.DN1_B	percentage_usage.LNd_A	percentage_usage.LNd_B	deltaPSI
bi	3_Junction_100496_Junction_100497	3_Junction_100496_Junction_100497	J001	0.0384719	5.15801	0.0231394	0.156678	7.56335	8.90609	0.669626	chrX	4321385	4322229	845	+	7	5	235	74	0.5	0.5	0.7276	0.8132	-0.2704
bi	3_Junction_100496_Junction_100497	3_Junction_100496_Junction_100497	J002	0.0390294	5.14039	0.0233754	0.157806	7.56331	5.95051	-0.892368	chrX	4321572	4322229	658	+	7	5	88	17	0.5	0.5	0.2724	0.1868	0.2704
SK	3_Junction_101840_Junction_101908	3_Junction_101840_Junction_101908	J001	0.145241	10.5117	0.00118622	0.0194666	7.84058	4.58481	-1.92247	chrX	5247037	5270079	23043	+	44	33	4	7	0.5432	0.5323	0.0556	0.2414	0.38925
SK	3_Junction_101840_Junction_101908	3_Junction_101840_Junction_101908	J002	0.143532	10.6081	0.00112593	0.018748	7.41423	10.5234	1.50202	chrX	5259946	5270079	10134	+	37	29	68	22	0.4568	0.4677	0.9444	0.7586	-0.38925
Act5C	3_Junction_102439_Junction_102441	3_Junction_102439_Junction_102441	J001	0.0157591	39.8423	2.75314e-10	4.77993e-08	13.9313	11.6131	-1.00504	chrX	5795046	5796721	1676	+	201	222	58	119	0.6018	0.5904	0.2387	0.3107	0.3214
Act5C	3_Junction_102439_Junction_102441	3_Junction_102439_Junction_102441	J002	0.0157402	39.8755	2.7068e-10	4.73873e-08	12.6321	14.7922	0.924693	chrX	5796129	5796721	593	+	133	154	185	264	0.3982	0.4096	0.7613	0.6893	-0.3214
CG9650	3_Junction_104161_Junction_104219	3_Junction_104161_Junction_104219	J001	0.0867593	4.08337	0.0433072	0.23503	8.82122	7.48107	-0.671481	chrX	6983174	7066966	83793	+	51	44	21	19	0.75	0.5867	0.5122	0.3455	0.2395
CG9650	3_Junction_104161_Junction_104219	3_Junction_104161_Junction_104219	J002	0.0871442	4.07051	0.0436382	0.236172	6.94239	8.31639	0.710958	chrX	7029861	7066966	37106	+	17	31	20	36	0.25	0.4133	0.4878	0.6545	-0.2395
Tbh	3_Junction_104862_Junction_104867	3_Junction_104862_Junction_104867	J001	0.398888	4.27579	0.038659	0.218784	6.43345	3.38769	-2.13244	chrX	7889766	7893302	3537	+	21	31	1	4	0.3088	0.4844	0.0137	0.2	0.28975
Tbh	3_Junction_104862_Junction_104867	3_Junction_104862_Junction_104867	J002	0.392889	4.33067	0.0374314	0.214259	7.51139	11.0351	1.68206	chrX	7889826	7893302	3477	+	47	33	72	16	0.6912	0.5156	0.9863	0.8	-0.28975
Sam-S	3_Junction_1145_Junction_1160_Junction_1181	3_Junction_1145_Junction_1160_Junction_1181	J001	0.0929632	9.35262	0.00222667	0.0311663	5.78997	9.73002	2.04847	chr2L	108101	108586	486	+	13	14	68	23	0.1008	0.1892	0.5152	0.3382	-0.2817
Sam-S	3_Junction_1145_Junction_1160_Junction_1181	3_Junction_1145_Junction_1160_Junction_1181	J002	0.0184723	4.83077	0.0279562	0.176324	10.161	9.69199	-0.216983	chr2L	108226	108586	361	+	84	46	59	37	0.6512	0.6216	0.447	0.5441	0.14085
Sam-S	3_Junction_1145_Junction_1160_Junction_1181	3_Junction_1145_Junction_1160_Junction_1181	J003	0.0880588	6.24741	0.0124375	0.104082	7.08903	4.41898	-1.65022	chr2L	108346	108586	241	+	32	14	5	8	0.2481	0.1892	0.0379	0.1176	0.1409
igl	3_Junction_16521_Junction_16530	3_Junction_16521_Junction_16530	J001	0.173864	4.95443	0.026024	0.168279	9.93519	7.47339	-1.20161	chr2R	11043720	11068016	24297	+	58	66	15	31	0.1742	0.1833	0.0246	0.0954	0.11875
igl	3_Junction_16521_Junction_16530	3_Junction_16521_Junction_16530	J002	0.172739	4.98369	0.0255873	0.166584	14.9517	17.4518	1.04832	chr2R	11052605	11068016	15412	+	275	294	594	294	0.8258	0.8167	0.9754	0.9046	-0.11875
Arf51F	3_Junction_16704_Junction_16706	3_Junction_16704_Junction_16706	J001	0.0398725	4.54264	0.0330606	0.198047	9.27844	10.4428	0.540187	chr2R	11210217	11210952	736	+	20	35	95	123	0.2857	0.3125	0.5398	0.4073	-0.17445
Arf51F	3_Junction_16704_Junction_16706	3_Junction_16704_Junction_16706	J002	0.0397993	4.5482	0.0329534	0.197675	11.9424	10.8762	-0.473612	chr2R	11210246	11210952	707	+	50	77	81	179	0.7143	0.6875	0.4602	0.5927	0.17445
CG5065	3_Junction_17878_Junction_17883_Junction_17891_Junction_17897	3_Junction_17878_Junction_17883_Junction_17891_Junction_17897	J001	0.154506	0.0272879	0.868794	1	14.5256	11.8687	-1.14519	chr2R	12495839	12506307	10469	+	251	184	52	185	0.3247	0.1724	0.1525	0.3109	0.01685
CG5065	3_Junction_17878_Junction_17883_Junction_17891_Junction_17897	3_Junction_17878_Junction_17883_Junction_17891_Junction_17897	J002	0.138537	5.86446	0.0154496	0.120515	14.3543	14.4604	0.0450993	chr2R	12496830	12506307	9478	+	249	166	208	265	0.3221	0.1556	0.61	0.4454	-0.28885
CG5065	3_Junction_17878_Junction_17883_Junction_17891_Junction_17897	3_Junction_17878_Junction_17883_Junction_17891_Junction_17897	J003	0.0301244	39.222	3.78258e-10	6.29291e-08	7.58953	10.4267	1.36676	chr2R	12500078	12506307	6230	+	18	30	41	105	0.0233	0.0281	0.1202	0.1765	-0.12265
CG5065	3_Junction_17878_Junction_17883_Junction_17891_Junction_17897	3_Junction_17878_Junction_17883_Junction_17891_Junction_17897	J004	0.19915	11.2543	0.000794367	0.0144123	17.3343	8.77561	-3.74333	chr2R	12505648	12506307	660	+	255	687	40	40	0.3299	0.6439	0.1173	0.0672	0.39465
Pkc53E	3_Junction_18248_Junction_18258	3_Junction_18248_Junction_18258	J001	0.0338586	9.50905	0.00204461	0.0292219	7.85603	9.29156	0.703295	chr2R	12812295	12813849	1555	+	27	30	42	48	0.4655	0.6122	0.8077	0.7869	-0.25845
Pkc53E	3_Junction_18248_Junction_18258	3_Junction_18248_Junction_18258	J002	0.03475	9.39633	0.00217421	0.0305787	7.45991	5.55985	-1.07648	chr2R	12813250	12813849	600	+	31	19	10	13	0.5345	0.3878	0.1923	0.2131	0.25845
Sik3	3_Junction_19729_Junction_19733_Junction_19745	3_Junction_19729_Junction_19733_Junction_19745	J001	0.0228336	2.49811	0.113983	0.41221	4.52924	5.6379	0.738016	chr2R	14576055	14579544	3490	+	7	8	12	11	0.2258	0.186	0.3429	0.3333	-0.1322
Sik3	3_Junction_19729_Junction_19733_Junction_19745	3_Junction_19729_Junction_19733_Junction_19745	J002	0.0204337	2.91624	0.0876922	0.354932	5.91312	6.83311	0.525759	chr2R	14576246	14579544	3299	+	11	17	20	17	0.3548	0.3953	0.5714	0.5152	-0.16825
Sik3	3_Junction_19729_Junction_19733_Junction_19745	3_Junction_19729_Junction_19733_Junction_19745	J003	0.0263406	12.6222	0.00038119	0.00828125	6.16265	3.52518	-1.85284	chr2R	14578411	14579544	1134	+	13	18	3	5	0.4194	0.4186	0.0857	0.1515	0.3004
CG10737	3_Junction_20117_Junction_20120	3_Junction_20117_Junction_20120	J001	0.151593	8.06617	0.00450994	0.0518913	16.0923	13.6433	-1.03653	chr2R	15064248	15065322	1075	+	574	533	98	132	0.9243	0.978	0.8167	0.7811	0.15225
CG10737	3_Junction_20117_Junction_20120	3_Junction_20117_Junction_20120	J002	0.153129	7.99686	0.00468586	0.0534186	6.72209	9.19013	1.2556	chr2R	15065078	15065322	245	+	47	12	22	37	0.0757	0.022	0.1833	0.2189	-0.15225
ITP	3_Junction_24354_Junction_24357	3_Junction_24354_Junction_24357	J001	0.299726	57.5214	3.34328e-14	1.3491e-11	12.247	25.4662	5.51935	chr2R	20443094	20445551	2458	+	13	23	50440	6620	0.1477	0.1825	0.9986	0.9913	-0.82985
ITP	3_Junction_24354_Junction_24357	3_Junction_24354_Junction_24357	J002	0.30059	57.3602	3.62868e-14	1.43376e-11	17.667	5.34992	-5.75139	chr2R	20445222	20445551	330	+	75	103	70	58	0.8523	0.8175	0.0014	0.0087	0.82985
bin3	3_Junction_25021_Junction_25041	3_Junction_25021_Junction_25041	J001	0.0347253	4.65023	0.0310494	0.189857	5.68788	4.10943	-1.08394	chr2R	2102256	2120769	18514	+	15	11	5	6	0.3947	0.3548	0.125	0.25	0.18725
bin3	3_Junction_25021_Junction_25041	3_Junction_25021_Junction_25041	J002	0.0321847	4.76962	0.0289662	0.180831	6.95514	7.94135	0.516146	chr2R	2108781	2120769	11989	+	23	20	35	18	0.6053	0.6452	0.875	0.75	-0.18725
CG2269	3_Junction_29579_Junction_29581	3_Junction_29579_Junction_29581	J001	0.0119078	14.1691	0.000167088	0.00434895	9.75178	7.84528	-0.924802	chr2R	5975109	5978046	2938	+	81	76	22	16	0.225	0.2027	0.1146	0.0829	0.1151
CG2269	3_Junction_29579_Junction_29581	3_Junction_29579_Junction_29581	J002	0.0116965	14.2766	0.000157818	0.00416675	14.0244	14.9486	0.3923	chr2R	5975273	5978046	2774	+	279	299	170	177	0.775	0.7973	0.8854	0.9171	-0.1151
Galphao	3_Junction_30038_Junction_30047	3_Junction_30038_Junction_30047	J001	0.0152113	10.5255	0.00117741	0.0193581	11.2833	10.0243	-0.569909	chr2R	6327136	6335702	8567	+	114	98	26	72	0.623	0.5506	0.3824	0.3956	0.1978
Galphao	3_Junction_30038_Junction_30047	3_Junction_30038_Junction_30047	J002	0.0152142	10.5244	0.00117807	0.0193612	10.1761	11.4134	0.557992	chr2R	6333129	6335702	2574	+	69	80	42	110	0.377	0.4494	0.6176	0.6044	-0.1978
CG6329	3_Junction_33409_Junction_33410_Junction_33411_Junction_33415_Junction_33420	3_Junction_33409_Junction_33410_Junction_33411_Junction_33415_Junction_33420	J001	0.0365879	1.57711	0.209178	0.569123	13.2339	13.9438	0.30417	chr2R	9713986	9717143	3158	+	144	167	181	196	0.309	0.4165	0.4142	0.4828	-0.08575
CG6329	3_Junction_33409_Junction_33410_Junction_33411_Junction_33415_Junction_33420	3_Junction_33409_Junction_33410_Junction_33411_Junction_33415_Junction_33420	J002	0.0411321	4.00524	0.0453592	0.24158	12.1367	10.7064	-0.635359	chr2R	9714022	9717143	3122	+	132	95	86	50	0.2833	0.2369	0.1968	0.1232	0.1001
CG6329	3_Junction_33409_Junction_33410_Junction_33411_Junction_33415_Junction_33420	3_Junction_33409_Junction_33410_Junction_33411_Junction_33415_Junction_33420	J003	0.0093997	0.758709	0.383733	0.760288	10.0665	10.4725	0.18576	chr2R	9714090	9717143	3054	+	69	50	65	68	0.1481	0.1247	0.1487	0.1675	-0.0217
CG6329	3_Junction_33409_Junction_33410_Junction_33411_Junction_33415_Junction_33420	3_Junction_33409_Junction_33410_Junction_33411_Junction_33415_Junction_33420	J004	0.00585508	0.0126635	0.910402	1	10.8278	10.8319	0.00185728	chr2R	9714542	9717143	2602	+	82	69	75	74	0.176	0.1721	0.1716	0.1823	-0.0029
CG6329	3_Junction_33409_Junction_33410_Junction_33411_Junction_33415_Junction_33420	3_Junction_33409_Junction_33410_Junction_33411_Junction_33415_Junction_33420	J005	0.0498699	0.216186	0.641962	0.931961	7.93492	7.52362	-0.211089	chr2R	9714914	9717143	2230	+	39	20	30	18	0.0837	0.0499	0.0686	0.0443	0.01035
CG33155	3_Junction_33585_Junction_33587	3_Junction_33585_Junction_33587	J001	0.0302486	5.36708	0.0205203	0.144964	11.6586	12.7702	0.48597	chr2R	9841950	9842420	471	+	126	112	103	116	0.2698	0.3111	0.4952	0.3803	-0.1473
CG33155	3_Junction_33585_Junction_33587	3_Junction_33585_Junction_33587	J002	0.0301855	5.37605	0.0204151	0.14458	14.6672	13.6415	-0.43674	chr2R	9842149	9842420	272	+	341	248	105	189	0.7302	0.6889	0.5048	0.6197	0.1473
A2bp1	3_Junction_34984_Junction_34985	3_Junction_34984_Junction_34985	J001	0.137159	3.90073	0.0482651	0.25056	8.31533	9.91446	0.764134	chr3L	10509262	10511060	1799	+	40	24	67	44	0.8	0.6154	0.9437	0.8462	-0.18725
A2bp1	3_Junction_34984_Junction_34985	3_Junction_34984_Junction_34985	J002	0.142415	3.80344	0.0511475	0.259186	5.87053	4.05491	-1.23764	chr3L	10509277	10511060	1784	+	10	15	4	8	0.2	0.3846	0.0563	0.1538	0.18725
kuz	3_Junction_3731_Junction_3734	3_Junction_3731_Junction_3734	J001	0.0191124	4.00705	0.0453103	0.241365	7.43471	8.55645	0.566901	chr2L	13550293	13551140	848	+	19	26	59	14	0.2235	0.26	0.4014	0.3111	-0.1145
kuz	3_Junction_3731_Junction_3734	3_Junction_3731_Junction_3734	J002	0.0187998	4.04125	0.0444009	0.238576	10.848	10.0559	-0.360538	chr2L	13550420	13551140	721	+	66	74	88	31	0.7765	0.74	0.5986	0.6889	0.1145
p130CAS	3_Junction_39597_Junction_39806	3_Junction_39597_Junction_39806	J001	0.205176	4.07333	0.0435653	0.235913	6.04621	3.96615	-1.41288	chr3L	168850	172059	3210	+	35	12	1	6	0.5072	0.3158	0.037	0.2308	0.2776
p130CAS	3_Junction_39597_Junction_39806	3_Junction_39597_Junction_39806	J002	0.201348	4.12491	0.0422563	0.231179	6.72036	8.76223	1.05113	chr3L	171868	172059	192	+	34	26	26	20	0.4928	0.6842	0.963	0.7692	-0.2776
Pka-R1	3_Junction_42506_Junction_42508_Junction_42522	3_Junction_42506_Junction_42508_Junction_42522	J001	0.0954295	0.284152	0.593992	0.906865	10.2133	9.14487	-0.498841	chr3L	20812569	20825944	13376	+	79	64	47	24	0.5163	0.4156	0.5165	0.2927	0.06135
Pka-R1	3_Junction_42506_Junction_42508_Junction_42522	3_Junction_42506_Junction_42508_Junction_42522	J002	0.137164	0.320937	0.571045	0.893788	9.83307	8.25119	-0.758268	chr3L	20813826	20825944	12119	+	57	68	19	39	0.3725	0.4416	0.2088	0.4756	0.06485
Pka-R1	3_Junction_42506_Junction_42508_Junction_42522	3_Junction_42506_Junction_42508_Junction_42522	J003	0.0168161	7.73934	0.00540305	0.0587347	6.48359	7.58253	0.593277	chr3L	20825700	20825944	245	+	17	22	25	19	0.1111	0.1429	0.2747	0.2317	-0.1262
CG11486	3_Junction_45616_Junction_45618_Junction_45629	3_Junction_45616_Junction_45618_Junction_45629	J001	0.106299	4.82679	0.0280208	0.176615	9.85936	7.18909	-1.31638	chr3L	3071189	3073079	1891	+	42	41	25	34	0.4719	0.5775	0.1773	0.3656	0.25325
CG11486	3_Junction_45616_Junction_45618_Junction_45629	3_Junction_45616_Junction_45618_Junction_45629	J002	0.0393887	0.155293	0.693528	0.956604	6.96271	6.27999	-0.381116	chr3L	3071307	3073079	1773	+	21	10	27	13	0.236	0.1408	0.1915	0.1398	0.02275
CG11486	3_Junction_45616_Junction_45618_Junction_45629	3_Junction_45616_Junction_45618_Junction_45629	J003	0.035446	11.7589	0.00060552	0.0115595	8.07251	9.79109	0.828119	chr3L	3072841	3073079	239	+	26	20	89	46	0.2921	0.2817	0.6312	0.4946	-0.276
sif	3_Junction_47624_Junction_47644	3_Junction_47624_Junction_47644	J001	0.0415274	5.96892	0.0145602	0.115736	9.46867	8.04538	-0.691038	chr3L	5652781	5660920	8140	+	59	54	18	35	0.4574	0.5192	0.2169	0.35	0.20485
sif	3_Junction_47624_Junction_47644	3_Junction_47624_Junction_47644	J002	0.0412782	5.99154	0.0143746	0.114746	9.63337	10.9074	0.583246	chr3L	5659136	5660920	1785	+	70	50	65	65	0.5426	0.4808	0.7831	0.65	-0.20485
sif	3_Junction_47677_Junction_47703	3_Junction_47677_Junction_47703	J001	0.0208039	3.96063	0.0465764	0.245466	11.5078	10.7482	-0.339551	chr3L	5670048	5697023	26976	+	145	93	55	59	0.7474	0.6889	0.6395	0.5566	0.1201
sif	3_Junction_47677_Junction_47703	3_Junction_47677_Junction_47703	J002	0.0210306	3.93621	0.0472572	0.247655	8.5356	9.50333	0.463902	chr3L	5692124	5697023	4900	+	49	42	31	47	0.2526	0.3111	0.3605	0.4434	-0.1201
nmo	3_Junction_50026_Junction_50029	3_Junction_50026_Junction_50029	J001	0.0311558	30.6668	3.06358e-08	2.98474e-06	8.28048	4.26495	-2.3793	chr3L	7972273	7973498	1226	+	46	30	4	7	0.1673	0.1271	0.0128	0.0294	0.1261
nmo	3_Junction_50026_Junction_50029	3_Junction_50026_Junction_50029	J002	0.0298922	31.2952	2.2163e-08	2.268e-06	13.8694	15.7405	0.792162	chr3L	7972780	7973498	719	+	229	206	308	231	0.8327	0.8729	0.9872	0.9706	-0.1261
Tsp66E	3_Junction_50913_Junction_50914	3_Junction_50913_Junction_50914	J001	0.0705867	4.60192	0.0319362	0.193605	10.0107	8.64166	-0.648191	chr3L	8905845	8906067	223	+	35	42	32	84	0.6364	0.75	0.3765	0.5419	0.234
Tsp66E	3_Junction_50913_Junction_50914	3_Junction_50913_Junction_50914	J002	0.0707133	4.59635	0.03204	0.193906	7.5462	8.98269	0.71535	chr3L	8905871	8906067	197	+	20	14	53	71	0.3636	0.25	0.6235	0.4581	-0.234
CG34356	3_Junction_52504_Junction_52512	3_Junction_52504_Junction_52512	J001	0.0593799	10.3029	0.00132821	0.0212458	10.9613	9.23591	-0.794661	chr3L	9951040	9954735	3696	+	131	81	34	32	0.8912	0.871	0.7391	0.5424	0.24035
CG34356	3_Junction_52504_Junction_52512	3_Junction_52504_Junction_52512	J002	0.0612341	10.0988	0.00148365	0.0231149	5.31261	7.56109	1.28564	chr3L	9953979	9954735	757	+	16	12	12	27	0.1088	0.129	0.2609	0.4576	-0.24035
CG42389	3_Junction_5292_Junction_5293	3_Junction_5292_Junction_5293	J001	0.0223961	8.98342	0.0027244	0.0359069	9.02265	9.80936	0.370883	chr2L	16652912	16657497	4586	+	84	64	28	34	0.8155	0.8312	0.9655	0.9714	-0.1451
CG42389	3_Junction_5292_Junction_5293	3_Junction_5292_Junction_5293	J002	0.0250983	8.81642	0.00298532	0.0384985	5.01324	2.34253	-2.38311	chr2L	16657429	16657497	69	+	19	13	1	1	0.1845	0.1688	0.0345	0.0286	0.1451
grp	3_Junction_5302_Junction_5310	3_Junction_5302_Junction_5310	J001	0.0403769	6.91733	0.00853641	0.0806804	4.68222	6.53507	1.1564	chr2L	16680276	16690900	10625	+	5	4	30	29	0.1613	0.0952	0.2778	0.3816	-0.20145
grp	3_Junction_5302_Junction_5310	3_Junction_5302_Junction_5310	J002	0.0391958	6.99938	0.00815381	0.078076	9.89431	8.72698	-0.552869	chr2L	16685941	16690900	4960	+	26	38	78	47	0.8387	0.9048	0.7222	0.6184	0.20145
Sap47	3_Junction_54739_Junction_54740	3_Junction_54739_Junction_54740	J001	0.00477567	30.1869	3.92358e-08	3.71448e-06	21.3936	20.4215	-0.401496	chr3R	11779956	11780303	348	+	1682	1218	1145	1803	0.7339	0.7377	0.5875	0.6217	0.1312
Sap47	3_Junction_54739_Junction_54740	3_Junction_54739_Junction_54740	J002	0.0047778	30.176	3.94564e-08	3.72915e-06	17.833	18.932	0.456469	chr3R	11779977	11780303	327	+	610	433	804	1097	0.2661	0.2623	0.4125	0.3783	-0.1312
cpo	3_Junction_56220_Junction_56227	3_Junction_56220_Junction_56227	J001	0.0644917	28.3681	1.00303e-07	8.31917e-06	9.21431	11.9136	1.22766	chr3R	13747191	13763242	16052	+	50	34	130	82	0.7246	0.5965	0.9848	0.9535	-0.3086
cpo	3_Junction_56220_Junction_56227	3_Junction_56220_Junction_56227	J002	0.0679586	27.5833	1.50472e-07	1.17763e-05	7.25282	2.91871	-3.03975	chr3R	13757886	13763242	5357	+	19	23	2	4	0.2754	0.4035	0.0152	0.0465	0.3086
CG12746	3_Junction_56481_Junction_56484	3_Junction_56481_Junction_56484	J001	0.292	5.0521	0.0245961	0.162673	7.47677	9.99689	1.22835	chr3R	1390746	1391808	1063	+	54	13	24	70	0.7606	0.3333	0.8889	0.9211	-0.35805
CG12746	3_Junction_56481_Junction_56484	3_Junction_56481_Junction_56484	J002	0.295875	4.99754	0.0253834	0.165967	6.44687	4.09954	-1.53871	chr3R	1391175	1391808	634	+	17	26	3	6	0.2394	0.6667	0.1111	0.0789	0.35805
PP2A-B'	3_Junction_56587_Junction_56589	3_Junction_56587_Junction_56589	J001	0.099457	4.4737	0.0344204	0.203261	8.38264	6.62731	-0.917078	chr3R	13993589	13995377	1789	+	22	31	24	20	0.7097	0.8158	0.3871	0.625	0.2567
PP2A-B'	3_Junction_56587_Junction_56589	3_Junction_56587_Junction_56589	J002	0.100154	4.45185	0.0348635	0.204666	5.23758	7.12038	1.10191	chr3R	13993928	13995377	1450	+	9	7	38	12	0.2903	0.1842	0.6129	0.375	-0.2567
CG43732	3_Junction_57926_Junction_57933	3_Junction_57926_Junction_57933	J001	0.0292947	19.6516	9.29255e-06	0.000400241	10.4903	11.9284	0.641937	chr3R	14798881	14800711	1831	+	77	63	32	190	0.7476	0.7975	0.9143	0.9694	-0.1693
CG43732	3_Junction_57926_Junction_57933	3_Junction_57926_Junction_57933	J002	0.0317911	18.9341	1.3531e-05	0.000547563	6.93563	3.70486	-2.13133	chr3R	14800023	14800711	689	+	26	16	3	6	0.2524	0.2025	0.0857	0.0306	0.1693
CG31221	3_Junction_58257_Junction_58260	3_Junction_58257_Junction_58260	J001	0.0851711	10.1463	0.00144593	0.0226699	14.704	12.7158	-0.851045	chr3R	15238486	15241353	2868	+	228	223	114	174	0.9661	0.9781	0.8143	0.911	0.10945
CG31221	3_Junction_58257_Junction_58260	3_Junction_58257_Junction_58260	J002	0.0875014	9.9636	0.00159666	0.0242771	4.44188	7.04799	1.61133	chr3R	15238828	15241353	2526	+	8	5	26	17	0.0339	0.0219	0.1857	0.089	-0.10945
CG5621	3_Junction_59535_Junction_59536	3_Junction_59535_Junction_59536	J001	0.183035	9.31446	0.00227353	0.0315504	6.9601	10.3638	1.67141	chr3R	16733083	16733653	571	+	17	21	89	36	0.1298	0.3818	0.7479	0.6545	-0.4454
CG5621	3_Junction_59535_Junction_59536	3_Junction_59535_Junction_59536	J002	0.182974	9.31724	0.00227008	0.0315257	10.8645	7.45205	-1.63639	chr3R	16733356	16733653	298	+	114	34	30	19	0.8702	0.6182	0.2521	0.3455	0.4454
Atpalpha	3_Junction_59616_Junction_59624	3_Junction_59616_Junction_59624	J001	0.0873039	7.18733	0.00734202	0.0729548	15.0259	17.2209	0.920716	chr3R	16792924	16798893	5970	+	273	265	221	853	0.1263	0.1316	0.2317	0.4196	-0.1967
Atpalpha	3_Junction_59616_Junction_59624	3_Junction_59616_Junction_59624	J002	0.0872529	7.19147	0.00732509	0.0728374	21.6467	19.47	-0.89962	chr3R	16796699	16798893	2195	+	1889	1748	733	1180	0.8737	0.8684	0.7683	0.5804	0.1967
Nrx-1	3_Junction_60969_Junction_60971	3_Junction_60969_Junction_60971	J001	0.0137752	37.8107	7.79542e-10	1.15504e-07	9.70928	6.50057	-1.62367	chr3R	18305442	18306516	1075	+	48	58	14	20	0.378	0.4143	0.0959	0.1274	0.2845
Nrx-1	3_Junction_60969_Junction_60971	3_Junction_60969_Junction_60971	J002	0.0134926	38.1264	6.63057e-10	1.00335e-07	11.0248	12.8196	0.789241	chr3R	18305487	18306516	1030	+	79	82	132	137	0.622	0.5857	0.9041	0.8726	-0.2845
CG31140	3_Junction_62673_Junction_62674	3_Junction_62673_Junction_62674	J001	0.00975893	22.0191	2.69954e-06	0.000143013	13.2879	14.5234	0.527473	chr3R	19803837	19804670	834	+	304	221	97	187	0.6482	0.6122	0.8362	0.8095	-0.19265
CG31140	3_Junction_62673_Junction_62674	3_Junction_62673_Junction_62674	J002	0.00981657	21.9595	2.78466e-06	0.000146296	11.5048	9.61101	-0.860248	chr3R	19803933	19804670	738	+	165	140	19	44	0.3518	0.3878	0.1638	0.1905	0.19265
msi	3_Junction_64494_Junction_64498_Junction_64500_Junction_64503	3_Junction_64494_Junction_64498_Junction_64500_Junction_64503	J001	0.0143978	16.378	5.18837e-05	0.00168784	14.133	12.7316	-0.601663	chr3R	21342071	21344981	2911	+	171	147	216	108	0.7037	0.6391	0.4854	0.4426	0.2074
msi	3_Junction_64494_Junction_64498_Junction_64500_Junction_64503	3_Junction_64494_Junction_64498_Junction_64500_Junction_64503	J002	0.0246145	14.2195	0.000162678	0.0042595	6.97598	3.60321	-2.24061	chr3R	21344116	21344981	866	+	18	14	9	2	0.0741	0.0609	0.0202	0.0082	0.0533
msi	3_Junction_64494_Junction_64498_Junction_64500_Junction_64503	3_Junction_64494_Junction_64498_Junction_64500_Junction_64503	J003	0.0324025	10.5182	0.00118203	0.0194095	7.38792	9.67223	1.12419	chr3R	21344159	21344981	823	+	16	21	73	56	0.0658	0.0913	0.164	0.2295	-0.1182
msi	3_Junction_64494_Junction_64498_Junction_64500_Junction_64503	3_Junction_64494_Junction_64498_Junction_64500_Junction_64503	J004	0.0119583	13.4791	0.000241237	0.00584817	9.86812	11.481	0.729995	chr3R	21344194	21344981	788	+	38	48	147	78	0.1564	0.2087	0.3303	0.3197	-0.14245
scrib	3_Junction_65157_Junction_65159_Junction_65163	3_Junction_65157_Junction_65159_Junction_65163	J001	0.390425	1.13707	0.286272	0.662977	4.41615	6.1857	1.14851	chr3R	22362223	22363091	869	+	5	4	31	10	0.0893	0.0625	0.4133	0.073	-0.16725
scrib	3_Junction_65157_Junction_65159_Junction_65163	3_Junction_65157_Junction_65159_Junction_65163	J002	0.0490762	13.1878	0.000281778	0.0066031	6.66457	8.59428	1.00032	chr3R	22362253	22363091	839	+	12	12	33	82	0.2143	0.1875	0.44	0.5985	-0.31835
scrib	3_Junction_65157_Junction_65159_Junction_65163	3_Junction_65157_Junction_65159_Junction_65163	J003	0.113008	15.0577	0.000104273	0.00299533	10.4462	6.5241	-1.94967	chr3R	22362323	22363091	769	+	39	48	11	45	0.6964	0.75	0.1467	0.3285	0.4856
unc80	3_Junction_66030_Junction_66031	3_Junction_66030_Junction_66031	J001	0.0188474	10.7893	0.00102088	0.0174325	7.64974	9.32628	0.825434	chr3R	23491916	23492147	232	+	32	42	33	32	0.1147	0.1603	0.2705	0.2909	-0.1432
unc80	3_Junction_66030_Junction_66031	3_Junction_66030_Junction_66031	J002	0.0184934	10.891	0.000966331	0.0167269	13.4111	12.3889	-0.441972	chr3R	23491967	23492147	181	+	247	220	89	78	0.8853	0.8397	0.7295	0.7091	0.1432
Vha100-1	3_Junction_67634_Junction_67637	3_Junction_67634_Junction_67637	J001	0.0347556	3.94728	0.0469471	0.246734	12.3893	11.5067	-0.387722	chr3R	24959151	24960769	1619	+	136	114	65	119	0.8344	0.8769	0.8025	0.7041	0.10235
Vha100-1	3_Junction_67634_Junction_67637	3_Junction_67634_Junction_67637	J002	0.0356604	3.88084	0.0488401	0.252142	7.0075	8.27196	0.653642	chr3R	24960320	24960769	450	+	27	16	16	50	0.1656	0.1231	0.1975	0.2959	-0.10235
kay	3_Junction_68045_Junction_68048	3_Junction_68045_Junction_68048	J001	0.036212	17.2019	3.361e-05	0.00117392	5.26953	7.31522	1.18477	chr3R	25599543	25617113	17571	+	16	11	18	17	0.4706	0.3548	0.9	0.85	-0.4623
kay	3_Junction_68045_Junction_68048	3_Junction_68045_Junction_68048	J002	0.0374529	17.0449	3.65072e-05	0.00126347	6.08674	3.15934	-2.14808	chr3R	25608869	25617113	8245	+	18	20	2	3	0.5294	0.6452	0.1	0.15	0.4623
RhoGAP100F	3_Junction_69601_Junction_69602	3_Junction_69601_Junction_69602	J001	0.0617501	7.60188	0.00583074	0.061843	5.97982	7.88304	1.03908	chr3R	27663626	27665600	1975	+	21	25	11	24	0.1826	0.3049	0.4583	0.5854	-0.2781
RhoGAP100F	3_Junction_69601_Junction_69602	3_Junction_69601_Junction_69602	J002	0.0607611	7.67843	0.00558848	0.0600363	9.20838	7.51564	-0.839008	chr3R	27663749	27665600	1852	+	94	57	13	17	0.8174	0.6951	0.5417	0.4146	0.2781
CG34384	3_Junction_70270_Junction_70275	3_Junction_70270_Junction_70275	J001	0.0200842	24.9627	5.84495e-07	3.84116e-05	10.0723	8.5237	-0.734224	chr3R	3644655	3662422	17768	+	74	59	25	39	0.925	0.9365	0.6098	0.65	0.30085
CG34384	3_Junction_70270_Junction_70275	3_Junction_70270_Junction_70275	J002	0.0214115	24.5399	7.27885e-07	4.67432e-05	3.6465	6.99786	2.21498	chr3R	3648039	3662422	14384	+	6	4	16	21	0.075	0.0635	0.3902	0.35	-0.30085
pros	3_Junction_73651_Junction_73664_Junction_73676_Junction_73681	3_Junction_73651_Junction_73664_Junction_73676_Junction_73681	J001	0.0343484	0.45394	0.50047	0.850779	11.1541	12.3746	0.538148	chr3R	7155678	7165378	9701	+	48	41	340	52	0.2727	0.3037	0.3807	0.2723	-0.0383
pros	3_Junction_73651_Junction_73664_Junction_73676_Junction_73681	3_Junction_73651_Junction_73664_Junction_73676_Junction_73681	J002	0.0110371	10.3789	0.00127463	0.020603	12.2652	11.2049	-0.467747	chr3R	7159275	7165378	6104	+	67	58	242	45	0.3807	0.4296	0.271	0.2356	0.15185
pros	3_Junction_73651_Junction_73664_Junction_73676_Junction_73681	3_Junction_73651_Junction_73664_Junction_73676_Junction_73681	J003	0.0813411	1.26944	0.259872	0.633096	10.6038	11.5967	0.444183	chr3R	7161344	7165378	4035	+	50	26	238	81	0.2841	0.1926	0.2665	0.4241	-0.10695
pros	3_Junction_73651_Junction_73664_Junction_73676_Junction_73681	3_Junction_73651_Junction_73664_Junction_73676_Junction_73681	J004	0.0148062	0.221964	0.637548	0.92962	6.85958	7.45013	0.315508	chr3R	7162787	7165378	2592	+	11	10	73	13	0.0625	0.0741	0.0817	0.0681	-0.0066
pros	3_Junction_73730_Junction_73962	3_Junction_73730_Junction_73962	J001	0.0542488	6.93093	0.00847178	0.0802295	6.73618	4.74163	-1.22677	chr3R	7218930	7471660	252731	+	18	45	8	1	0.375	0.5114	0.2162	0.0769	0.29665
pros	3_Junction_73730_Junction_73962	3_Junction_73730_Junction_73962	J002	0.0532417	6.98626	0.00821376	0.0785204	7.09668	8.6603	0.796676	chr3R	7433868	7471660	37793	+	30	43	29	12	0.625	0.4886	0.7838	0.9231	-0.29665
toy	3_Junction_76578_Junction_76580	3_Junction_76578_Junction_76580	J001	0.0136504	7.57285	0.00592541	0.0625776	14.6694	15.5308	0.363697	chr4	1019319	1024782	5464	+	225	135	387	423	0.4989	0.418	0.5899	0.5883	-0.13065
toy	3_Junction_76578_Junction_76580	3_Junction_76578_Junction_76580	J002	0.013657	7.57013	0.00593434	0.0626315	15.1753	14.2952	-0.372695	chr4	1019331	1024782	5452	+	226	188	269	296	0.5011	0.582	0.4101	0.4117	0.13065
spir	3_Junction_7708_Junction_7709	3_Junction_7708_Junction_7709	J001	0.274971	4.63026	0.0314127	0.191523	8.21608	11.3568	1.46684	chr2L	20340112	20343597	3486	+	29	43	21	153	0.1526	0.3613	0.4667	0.7846	-0.3687
spir	3_Junction_7708_Junction_7709	3_Junction_7708_Junction_7709	J002	0.274732	4.63418	0.0313411	0.191209	11.7972	8.63912	-1.4532	chr2L	20342481	20343597	1117	+	161	76	24	42	0.8474	0.6387	0.5333	0.2154	0.3687
CG32850	3_Junction_77857_Junction_77862	3_Junction_77857_Junction_77862	J001	0.112517	3.99054	0.0457564	0.242887	8.06155	6.53962	-0.806134	chr4	335583	337017	1435	+	37	28	16	16	0.4933	0.2478	0.1538	0.1667	0.2103
CG32850	3_Junction_77857_Junction_77862	3_Junction_77857_Junction_77862	J002	0.111337	4.02401	0.0448571	0.239871	10.0832	11.508	0.6426	chr4	335805	337017	1213	+	38	85	88	80	0.5067	0.7522	0.8462	0.8333	-0.2103
Tomosyn	3_Junction_83178_Junction_83186_Junction_83187	3_Junction_83178_Junction_83186_Junction_83187	J001	0.34936	0.235299	0.627622	0.925029	9.82989	9.99087	0.0745088	chrX	12538800	12545141	6342	+	67	54	32	78	0.4408	0.5294	0.1768	0.629	0.0822
Tomosyn	3_Junction_83178_Junction_83186_Junction_83187	3_Junction_83178_Junction_83186_Junction_83187	J002	0.0601778	4.83343	0.027913	0.176216	8.63535	7.67366	-0.481416	chrX	12542816	12545141	2326	+	59	24	25	22	0.3882	0.2353	0.1381	0.1774	0.154
Tomosyn	3_Junction_83178_Junction_83186_Junction_83187	3_Junction_83178_Junction_83186_Junction_83187	J003	0.389191	1.20339	0.272646	0.647485	7.25413	11.5607	2.05119	chrX	12543083	12545141	2059	+	26	24	124	24	0.1711	0.2353	0.6851	0.1935	-0.2361
fne	3_Junction_83553_Junction_83554	3_Junction_83553_Junction_83554	J001	0.0738196	11.1424	0.000843762	0.0150541	15.2671	12.7896	-1.05705	chrX	12836880	12837117	238	+	241	181	171	194	0.713	0.6606	0.2799	0.4543	0.3197
fne	3_Junction_83553_Junction_83554	3_Junction_83553_Junction_83554	J002	0.0737982	11.1454	0.00084239	0.015039	12.6002	15.0812	1.06072	chrX	12836889	12837117	229	+	97	93	440	233	0.287	0.3394	0.7201	0.5457	-0.3197
gce	3_Junction_87877_Junction_87881	3_Junction_87877_Junction_87881	J001	0.068811	16.3525	5.25862e-05	0.00170581	9.35378	6.55515	-1.42616	chrX	15191969	15199860	7892	+	87	49	13	11	0.719	0.8167	0.2407	0.4231	0.43595
gce	3_Junction_87877_Junction_87881	3_Junction_87877_Junction_87881	J002	0.0693204	16.2749	5.4784e-05	0.00176403	6.23902	9.1014	1.48635	chrX	15193616	15199860	6245	+	34	11	41	15	0.281	0.1833	0.7593	0.5769	-0.43595
NONE	3_Junction_91477_Junction_91494	3_Junction_91477_Junction_91494	J001	0.0219943	5.27604	0.0216209	0.149619	5.11484	6.4826	0.831784	chrX	17831609	17864127	32519	+	10	15	10	16	0.2222	0.2778	0.4545	0.4706	-0.21255
NONE	3_Junction_91477_Junction_91494	3_Junction_91477_Junction_91494	J002	0.0211483	5.32961	0.0209661	0.146957	7.85456	6.85743	-0.525282	chrX	17837408	17864127	26720	+	35	39	12	18	0.7778	0.7222	0.5455	0.5294	0.21255
Mnt	3_Junction_99417_Junction_99425_Junction_99428	3_Junction_99417_Junction_99425_Junction_99428	J001	0.0157408	16.2819	5.45838e-05	0.00175966	7.70857	9.3044	0.784792	chrX	3577482	3586984	9503	+	31	35	32	43	0.2627	0.2174	0.4571	0.5181	-0.24755
Mnt	3_Junction_99417_Junction_99425_Junction_99428	3_Junction_99417_Junction_99425_Junction_99428	J002	0.0381747	5.10707	0.0238285	0.159653	10.7365	8.97161	-0.819629	chrX	3582528	3586984	4457	+	66	111	29	38	0.5593	0.6894	0.4143	0.4578	0.1883
Mnt	3_Junction_99417_Junction_99425_Junction_99428	3_Junction_99417_Junction_99425_Junction_99428	J003	0.216097	0.930313	0.334782	0.714669	6.08555	4.57011	-0.97797	chrX	3583515	3586984	3470	+	21	15	9	2	0.178	0.0932	0.1286	0.0241	0.05925
tlk	3_Junction_99511_Junction_99512	3_Junction_99511_Junction_99512	J001	0.0177241	54.0283	1.97618e-13	6.61404e-11	8.46203	11.5399	1.42631	chrX	3614355	3615407	1053	+	26	27	162	67	0.321	0.3293	0.8265	0.7614	-0.4688
tlk	3_Junction_99511_Junction_99512	3_Junction_99511_Junction_99512	J002	0.0179343	53.7284	2.30209e-13	7.61523e-11	10.7077	7.08915	-1.7579	chrX	3614546	3615407	862	+	55	55	34	21	0.679	0.6707	0.1735	0.2386	0.4688
Cda5	5_Junction_10143_Junction_10144	5_Junction_10143_Junction_10144	J001	0.0235445	21.4418	3.64726e-06	0.000184461	7.72665	5.12533	-1.49302	chr2L	33270	33843	574	-	33	53	4	8	0.7333	0.6709	0.2667	0.2286	0.45445
Cda5	5_Junction_10143_Junction_10144	5_Junction_10143_Junction_10144	J002	0.0238366	21.3648	3.79671e-06	0.000191086	5.61532	8.03148	1.33512	chr2L	33270	34556	1287	-	12	26	11	27	0.2667	0.3291	0.7333	0.7714	-0.45445
RpL36	5_Junction_101788_Junction_101790_Junction_101791_Junction_101792_Junction_101794	5_Junction_101788_Junction_101790_Junction_101791_Junction_101792_Junction_101794	J001	0.0653445	0.282586	0.595011	0.907463	6.53685	6.09043	-0.256325	chrX	522911	523322	412	-	17	10	23	13	0.0136	0.0068	0.01	0.0058	0.0023
RpL36	5_Junction_101788_Junction_101790_Junction_101791_Junction_101792_Junction_101794	5_Junction_101788_Junction_101790_Junction_101791_Junction_101792_Junction_101794	J002	0.00952736	1.60199	0.205622	0.563433	7.47136	8.29805	0.42038	chrX	522911	523357	447	-	17	21	41	44	0.0136	0.0142	0.0178	0.0196	-0.0048
RpL36	5_Junction_101788_Junction_101790_Junction_101791_Junction_101792_Junction_101794	5_Junction_101788_Junction_101790_Junction_101791_Junction_101792_Junction_101794	J003	0.00523297	73.5568	9.77806e-18	8.06293e-15	18.594	20.1897	0.660967	chrX	522911	523359	449	-	507	635	1477	1500	0.4046	0.4299	0.6427	0.669	-0.2386
RpL36	5_Junction_101788_Junction_101790_Junction_101791_Junction_101792_Junction_101794	5_Junction_101788_Junction_101790_Junction_101791_Junction_101792_Junction_101794	J004	0.0509782	0.0225235	0.880703	1	6.58015	6.66849	0.0492692	chrX	522911	523379	469	-	10	17	17	31	0.008	0.0115	0.0074	0.0138	-0.00085
RpL36	5_Junction_101788_Junction_101790_Junction_101791_Junction_101792_Junction_101794	5_Junction_101788_Junction_101790_Junction_101791_Junction_101792_Junction_101794	J005	0.00581717	71.8008	2.38052e-17	1.80593e-14	19.5261	17.5774	-0.808986	chrX	522911	523413	503	-	702	794	740	654	0.5603	0.5376	0.322	0.2917	0.2421
CG42492	5_Junction_102155_Junction_102156	5_Junction_102155_Junction_102156	J001	0.0296496	17.9627	2.25277e-05	0.000838849	7.12145	9.53385	1.20071	chrX	5523057	5523416	360	-	32	25	32	44	0.0766	0.0804	0.2991	0.1991	-0.1706
CG42492	5_Junction_102155_Junction_102156	5_Junction_102155_Junction_102156	J002	0.0291351	18.1525	2.03897e-05	0.000773926	14.8834	13.2954	-0.676757	chrX	5523057	5523428	372	-	386	286	75	177	0.9234	0.9196	0.7009	0.8009	0.1706
CHES-1-like	5_Junction_104598_Junction_104599	5_Junction_104598_Junction_104599	J001	0.0239123	31.9688	1.56667e-08	1.66927e-06	9.33105	7.65914	-0.822841	chrX	7584029	7590508	6480	-	45	48	27	25	0.9574	0.9796	0.6	0.6098	0.3636
CHES-1-like	5_Junction_104598_Junction_104599	5_Junction_104598_Junction_104599	J002	0.0259176	31.376	2.12595e-08	2.18735e-06	2.17573	6.51326	3.52022	chrX	7584029	7598809	14781	-	2	1	18	16	0.0426	0.0204	0.4	0.3902	-0.3636
CG18624	5_Junction_104705_Junction_104706	5_Junction_104705_Junction_104706	J001	0.058456	14.1071	0.000172692	0.00445602	6.75666	9.16497	1.22454	chrX	7787523	7787619	97	-	26	13	25	65	0.1204	0.073	0.4098	0.279	-0.2477
CG18624	5_Junction_104705_Junction_104706	5_Junction_104705_Junction_104706	J002	0.0577193	14.2279	0.000161953	0.00424642	13.5882	11.6162	-0.856997	chrX	7787523	7787781	259	-	190	165	36	168	0.8796	0.927	0.5902	0.721	0.2477
Opa1	5_Junction_15789_Junction_15790	5_Junction_15789_Junction_15790	J001	0.176013	4.33505	0.0373353	0.21399	7.28849	9.15033	0.930542	chr2R	10119469	10120219	751	-	26	22	39	44	0.1985	0.1746	0.65	0.3121	-0.2945
Opa1	5_Junction_15789_Junction_15790	5_Junction_15789_Junction_15790	J002	0.175112	4.35411	0.0369198	0.21259	11.7813	9.90902	-0.843766	chr2R	10119469	10120228	760	-	105	104	21	97	0.8015	0.8254	0.35	0.6879	0.2945
lolal	5_Junction_19311_Junction_19317	5_Junction_19311_Junction_19317	J001	0.0508508	9.05761	0.00261604	0.0348905	3.53152	5.87851	1.67918	chr2R	14043670	14045188	1519	-	1	5	24	11	0.0303	0.1613	0.381	0.3056	-0.2475
lolal	5_Junction_19311_Junction_19317	5_Junction_19311_Junction_19317	J002	0.0472847	9.31025	0.00227876	0.0316076	8.85675	7.42911	-0.715795	chr2R	14043670	14045445	1776	-	32	26	39	25	0.9697	0.8387	0.619	0.6944	0.2475
yki	5_Junction_23995_Junction_23996	5_Junction_23995_Junction_23996	J001	0.116698	3.97284	0.0462398	0.244462	9.49029	8.001	-0.723568	chr2R	19953836	19954082	247	-	48	47	12	54	0.4248	0.4052	0.1143	0.2919	0.2119
yki	5_Junction_23995_Junction_23996	5_Junction_23995_Junction_23996	J002	0.116046	3.99032	0.0457624	0.242887	10.5753	12.023	0.644896	chr2R	19953836	19954684	849	-	65	69	93	131	0.5752	0.5948	0.8857	0.7081	-0.2119
CG42568	5_Junction_24106_Junction_24107	5_Junction_24106_Junction_24107	J001	0.0243717	7.09252	0.00774064	0.0754918	8.19747	9.54331	0.649867	chr2R	20046608	20046666	59	-	24	33	55	54	0.24	0.3028	0.5	0.4091	-0.18315
CG42568	5_Junction_24106_Junction_24107	5_Junction_24106_Junction_24107	J002	0.0241907	7.12097	0.00761876	0.0747129	11.2081	10.1003	-0.501449	chr2R	20046608	20046670	63	-	76	76	55	78	0.76	0.6972	0.5	0.5909	0.18315
Vha16-1	5_Junction_25172_Junction_25173_Junction_25174	5_Junction_25172_Junction_25173_Junction_25174	J001	0.139485	5.06899	0.0243575	0.16175	5.44682	8.88506	1.86075	chr2R	2519645	2519809	165	-	12	11	52	18	0.0755	0.0679	0.3444	0.1374	-0.1692
Vha16-1	5_Junction_25172_Junction_25173_Junction_25174	5_Junction_25172_Junction_25173_Junction_25174	J002	0.0603557	0.225202	0.635104	0.928445	9.28058	8.72433	-0.266746	chr2R	2519645	2519827	183	-	57	39	32	41	0.3585	0.2407	0.2119	0.313	0.03715
Vha16-1	5_Junction_25172_Junction_25173_Junction_25174	5_Junction_25172_Junction_25173_Junction_25174	J003	0.0496043	2.35997	0.124485	0.432934	11.6931	10.7595	-0.416452	chr2R	2519645	2520498	854	-	90	112	67	72	0.566	0.6914	0.4437	0.5496	0.13205
CG18812	5_Junction_26604_Junction_26605	5_Junction_26604_Junction_26605	J001	0.149729	7.97512	0.00474247	0.0537408	9.22917	11.5324	1.05241	chr2R	3607501	3609537	2037	-	55	50	56	109	0.3143	0.3049	0.8358	0.5707	-0.39365
CG18812	5_Junction_26604_Junction_26605	5_Junction_26604_Junction_26605	J002	0.149624	7.97985	0.00473008	0.0537085	11.7727	9.47081	-1.0444	chr2R	3607501	3613192	5692	-	120	114	11	82	0.6857	0.6951	0.1642	0.4293	0.39365
CG17977	5_Junction_26974_Junction_26975	5_Junction_26974_Junction_26975	J001	0.0267891	8.41926	0.00371267	0.0451946	10.6339	11.5269	0.399675	chr2R	3954798	3954846	49	-	105	91	71	60	0.8607	0.8053	0.9467	0.9524	-0.11655
CG17977	5_Junction_26974_Junction_26975	5_Junction_26974_Junction_26975	J002	0.0289393	8.2256	0.00413035	0.048827	6.02664	3.79272	-1.54321	chr2R	3954798	3954911	114	-	17	22	4	3	0.1393	0.1947	0.0533	0.0476	0.11655
CG13954	5_Junction_28538_Junction_28539_Junction_28540	5_Junction_28538_Junction_28539_Junction_28540	J001	0.135483	0.249542	0.617397	0.919351	10.6652	11.4398	0.346902	chr2R	5238678	5238912	235	-	74	61	99	86	0.1869	0.2103	0.1554	0.3675	-0.06285
CG13954	5_Junction_28538_Junction_28539_Junction_28540	5_Junction_28538_Junction_28539_Junction_28540	J002	0.106164	0.395877	0.529226	0.868849	12.5075	14.372	0.800614	chr2R	5238678	5238944	267	-	156	85	332	72	0.3939	0.2931	0.5212	0.3077	-0.07095
CG13954	5_Junction_28538_Junction_28539_Junction_28540	5_Junction_28538_Junction_28539_Junction_28540	J003	0.0139201	7.79238	0.00524672	0.0578084	13.4009	12.9489	-0.194664	chr2R	5238678	5238965	288	-	166	144	206	76	0.4192	0.4966	0.3234	0.3248	0.1338
Pka-R2	5_Junction_29244_Junction_29247	5_Junction_29244_Junction_29247	J001	0.224384	8.09073	0.00444922	0.0512568	8.95738	12.0907	1.42808	chr2R	5887420	5888328	909	-	68	24	109	85	0.2742	0.1491	0.8074	0.509	-0.44655
Pka-R2	5_Junction_29244_Junction_29247	5_Junction_29244_Junction_29247	J002	0.224175	8.09773	0.00443207	0.0511128	12.9896	9.83469	-1.40495	chr2R	5887420	5892660	5241	-	180	137	26	82	0.7258	0.8509	0.1926	0.491	0.44655
Pka-R2	5_Junction_29266_Junction_29267	5_Junction_29266_Junction_29267	J001	0.0554117	5.83828	0.0156812	0.121858	5.6553	3.8323	-1.28639	chr2R	5911707	5913332	1626	-	19	12	1	7	0.2969	0.2034	0.0303	0.1228	0.1736
Pka-R2	5_Junction_29266_Junction_29267	5_Junction_29266_Junction_29267	J002	0.0503133	6.05362	0.0138778	0.112065	8.58358	9.64877	0.508535	chr2R	5911707	5913353	1647	-	45	47	32	50	0.7031	0.7966	0.9697	0.8772	-0.1736
lola	5_Junction_30325_Junction_30327	5_Junction_30325_Junction_30327	J001	0.0547032	8.38648	0.00378023	0.0458698	9.90557	7.80291	-1.0178	chr2R	6421473	6422353	881	-	33	49	35	39	0.193	0.2168	0.0573	0.1102	0.12115
lola	5_Junction_30325_Junction_30327	5_Junction_30325_Junction_30327	J002	0.0541605	8.45355	0.00364331	0.0445984	14.3175	16.0494	0.730939	chr2R	6421473	6428848	7376	-	138	177	576	315	0.807	0.7832	0.9427	0.8898	-0.12115
bun	5_Junction_3090_Junction_3093	5_Junction_3090_Junction_3093	J001	0.233514	6.69121	0.00968892	0.0882598	7.38903	10.2785	1.40367	chr2L	12477166	12498523	21358	-	23	19	77	60	0.2473	0.3519	0.875	0.5825	-0.42915
bun	5_Junction_3090_Junction_3093	5_Junction_3090_Junction_3093	J002	0.233885	6.68185	0.00973995	0.0885544	10.0464	7.16203	-1.41725	chr2L	12477166	12536273	59108	-	70	35	11	43	0.7527	0.6481	0.125	0.4175	0.42915
MFS17	5_Junction_33749_Junction_33751_Junction_33752_Junction_33753	5_Junction_33749_Junction_33751_Junction_33752_Junction_33753	J001	0.0122923	9.68786	0.0018549	0.0272075	9.1765	9.82202	0.303308	chr2RHet	1265686	1286304	20619	-	57	48	36	57	0.0426	0.036	0.0646	0.0828	-0.0344
MFS17	5_Junction_33749_Junction_33751_Junction_33752_Junction_33753	5_Junction_33749_Junction_33751_Junction_33752_Junction_33753	J002	0.102778	1.27635	0.258579	0.631377	11.5868	11.581	-0.00256734	chr2RHet	1265686	1291240	25555	-	73	146	53	113	0.0546	0.1094	0.0952	0.1642	-0.0477
MFS17	5_Junction_33749_Junction_33751_Junction_33752_Junction_33753	5_Junction_33749_Junction_33751_Junction_33752_Junction_33753	J003	0.0865027	7.72473	0.00544696	0.0590428	19.1919	16.3298	-1.19154	chr2RHet	1265686	1292102	26417	-	1104	993	244	425	0.8257	0.7444	0.4381	0.6177	0.25715
MFS17	5_Junction_33749_Junction_33751_Junction_33752_Junction_33753	5_Junction_33749_Junction_33751_Junction_33752_Junction_33753	J004	0.213176	2.87043	0.090221	0.360232	11.9879	14.1978	0.953552	chr2RHet	1265686	1293054	27369	-	103	147	224	93	0.077	0.1102	0.4022	0.1352	-0.1751
NONE	5_Junction_34205_Junction_34207	5_Junction_34205_Junction_34207	J001	0.0327798	34.2527	4.83995e-09	5.9477e-07	6.60519	2.4354	-3.23488	chr2RHet	3080082	3080149	68	-	12	15	2	3	0.6316	0.6522	0.08	0.0577	0.57305
NONE	5_Junction_34205_Junction_34207	5_Junction_34205_Junction_34207	J002	0.0300537	35.0199	3.26356e-09	4.19157e-07	5.18981	7.70567	1.4399	chr2RHet	3080082	3085749	5668	-	7	8	23	49	0.3684	0.3478	0.92	0.9423	-0.57305
CG17684	5_Junction_34526_Junction_34528	5_Junction_34526_Junction_34528	J001	0.0210525	4.21352	0.040103	0.223876	9.60252	8.89484	-0.335858	chr2RHet	862303	1004929	142627	-	24	22	128	36	0.8889	0.9167	0.7574	0.7826	0.1328
CG17684	5_Junction_34526_Junction_34528	5_Junction_34526_Junction_34528	J002	0.0221322	4.16694	0.0412202	0.227921	4.02407	5.65508	1.13096	chr2RHet	862303	869248	6946	-	3	2	41	10	0.1111	0.0833	0.2426	0.2174	-0.1328
CG17684	5_Junction_34678_Junction_34681_Junction_34685_Junction_34689_Junction_34693	5_Junction_34678_Junction_34681_Junction_34685_Junction_34689_Junction_34693	J001	0.0149878	30.8733	2.75435e-08	2.7126e-06	11.6861	9.4154	-1.0323	chr2RHet	916757	917160	404	-	84	163	44	29	0.3871	0.4579	0.1739	0.1657	0.2527
CG17684	5_Junction_34678_Junction_34681_Junction_34685_Junction_34689_Junction_34693	5_Junction_34678_Junction_34681_Junction_34685_Junction_34689_Junction_34693	J002	0.0388198	4.12695	0.0422054	0.231034	4.97333	7.43039	1.44082	chr2RHet	916757	918928	2172	-	13	10	21	16	0.0599	0.0281	0.083	0.0914	-0.0432
CG17684	5_Junction_34678_Junction_34681_Junction_34685_Junction_34689_Junction_34693	5_Junction_34678_Junction_34681_Junction_34685_Junction_34689_Junction_34693	J003	0.153481	0.330496	0.565367	0.890991	8.72527	9.65488	0.442354	chr2RHet	916757	934343	17587	-	21	73	33	48	0.0968	0.2051	0.1304	0.2743	-0.0514
CG17684	5_Junction_34678_Junction_34681_Junction_34685_Junction_34689_Junction_34693	5_Junction_34678_Junction_34681_Junction_34685_Junction_34689_Junction_34693	J004	0.2093	0.0398521	0.84177	1	7.85148	8.19613	0.173717	chr2RHet	916757	941125	24369	-	51	23	25	23	0.235	0.0646	0.0988	0.1314	0.0347
CG17684	5_Junction_34678_Junction_34681_Junction_34685_Junction_34689_Junction_34693	5_Junction_34678_Junction_34681_Junction_34685_Junction_34689_Junction_34693	J005	0.0600334	5.58369	0.0181285	0.134216	9.76683	12.6723	1.29916	chr2RHet	916757	948010	31254	-	48	87	130	59	0.2212	0.2444	0.5138	0.3371	-0.19265
CG32085	5_Junction_35714_Junction_35715	5_Junction_35714_Junction_35715	J001	0.0357808	11.8669	0.00057139	0.0110692	6.67725	8.29101	0.843917	chr3L	11668765	11673050	4286	-	26	22	28	21	0.5417	0.5238	0.9333	0.7778	-0.3228
CG32085	5_Junction_35714_Junction_35715	5_Junction_35714_Junction_35715	J002	0.0377843	11.6545	0.000640468	0.0121106	6.33857	3.90332	-1.63354	chr3L	11668765	11673142	4378	-	22	20	2	6	0.4583	0.4762	0.0667	0.2222	0.3228
CG5946	5_Junction_35840_Junction_35841	5_Junction_35840_Junction_35841	J001	0.244187	6.41684	0.0113043	0.0976067	10.8613	8.00231	-1.35248	chr3L	11812007	11812919	913	-	59	95	10	53	0.3224	0.4948	0.0418	0.1715	0.30195
CG5946	5_Junction_35840_Junction_35841	5_Junction_35840_Junction_35841	J002	0.243309	6.43801	0.0111704	0.0969773	11.9516	14.907	1.2703	chr3L	11812007	11814932	2926	-	124	97	229	256	0.6776	0.5052	0.9582	0.8285	-0.30195
CG10960	5_Junction_36585_Junction_36587	5_Junction_36585_Junction_36587	J001	0.0191315	28.3239	1.02623e-07	8.47448e-06	9.2447	6.37155	-1.47842	chr3L	12820682	12824981	4300	-	32	19	26	32	0.6154	0.5135	0.1757	0.2092	0.372
CG10960	5_Junction_36585_Junction_36587	5_Junction_36585_Junction_36587	J002	0.0186642	28.5921	8.93479e-08	7.54712e-06	8.38191	10.5766	1.03438	chr3L	12820682	12828410	7729	-	20	18	122	121	0.3846	0.4865	0.8243	0.7908	-0.372
pHCl	5_Junction_38541_Junction_38542	5_Junction_38541_Junction_38542	J001	0.192637	5.61435	0.017814	0.132579	10.9403	8.68077	-1.05195	chr3L	15853126	15856182	3057	-	84	32	69	24	0.8	0.6531	0.5036	0.2222	0.36365
pHCl	5_Junction_38541_Junction_38542	5_Junction_38541_Junction_38542	J002	0.192742	5.61161	0.0178419	0.132699	7.63626	9.88012	1.09158	chr3L	15853126	15857066	3941	-	21	17	68	84	0.2	0.3469	0.4964	0.7778	-0.36365
CG7971	5_Junction_39386_Junction_39388	5_Junction_39386_Junction_39388	J001	0.00889174	22.6504	1.94324e-06	0.000108185	14.0508	12.6221	-0.614175	chr3L	1664021	1664088	68	-	223	190	96	158	0.5718	0.5588	0.3951	0.3405	0.1975
CG7971	5_Junction_39386_Junction_39388	5_Junction_39386_Junction_39388	J002	0.0088851	22.661	1.93251e-06	0.000107817	13.1639	14.5174	0.578354	chr3L	1664021	1664530	510	-	167	150	147	306	0.4282	0.4412	0.6049	0.6595	-0.1975
Rbp6	5_Junction_39784_Junction_39785	5_Junction_39784_Junction_39785	J001	0.0120426	41.0548	1.4802e-10	2.7795e-08	16.1858	14.2436	-0.819589	chr3L	17122071	17140205	18135	-	476	349	85	321	0.8081	0.7843	0.5743	0.5071	0.2555
Rbp6	5_Junction_39784_Junction_39785	5_Junction_39784_Junction_39785	J002	0.0120816	40.9597	1.55404e-10	2.87079e-08	11.576	13.9409	1.02555	chr3L	17122071	17158011	35941	-	113	96	63	312	0.1919	0.2157	0.4257	0.4929	-0.2555
drpr	5_Junction_39792_Junction_39793	5_Junction_39792_Junction_39793	J001	0.0533169	34.0944	5.25029e-09	6.43806e-07	8.00665	3.77972	-2.628	chr3L	1716556	1716673	118	-	44	37	5	2	0.5238	0.6607	0.1	0.0435	0.5205
drpr	5_Junction_39792_Junction_39793	5_Junction_39792_Junction_39793	J002	0.0523909	34.3893	4.51201e-09	5.60524e-07	7.09259	10.2044	1.52706	chr3L	1716556	1716795	240	-	40	19	45	44	0.4762	0.3393	0.9	0.9565	-0.5205
CG13937	5_Junction_40887_Junction_40888	5_Junction_40887_Junction_40888	J001	0.0840368	14.3092	0.000155108	0.00411046	8.30202	11.0247	1.27591	chr3L	1878039	1878354	316	-	23	26	97	114	0.1855	0.2549	0.708	0.5205	-0.39405
CG13937	5_Junction_40887_Junction_40888	5_Junction_40887_Junction_40888	J002	0.0839775	14.3175	0.000154425	0.0040981	12.2933	9.64297	-1.19199	chr3L	1878039	1881127	3089	-	101	76	40	105	0.8145	0.7451	0.292	0.4795	0.39405
unc-13-4A	5_Junction_49392_Junction_49394	5_Junction_49392_Junction_49394	J001	0.016506	46.8707	7.58268e-12	1.85164e-09	11.5576	13.597	0.886695	chr3L	7305330	7305838	509	-	134	88	190	88	0.6473	0.6769	0.9548	0.9167	-0.27365
unc-13-4A	5_Junction_49392_Junction_49394	5_Junction_49392_Junction_49394	J002	0.0169821	46.302	1.0136e-11	2.42314e-09	9.46934	5.2085	-2.2918	chr3L	7305330	7306040	711	-	73	42	9	8	0.3527	0.3231	0.0452	0.0833	0.27365
PRL-1	5_Junction_5099_Junction_5100_Junction_5101	5_Junction_5099_Junction_5100_Junction_5101	J001	0.0497813	2.24856	0.133739	0.449832	9.78713	9.27047	-0.242467	chr2L	16250158	16251239	1082	-	29	30	123	25	0.3295	0.2479	0.2269	0.1429	0.1038
PRL-1	5_Junction_5099_Junction_5100_Junction_5101	5_Junction_5099_Junction_5100_Junction_5101	J002	0.0128046	5.07402	0.024287	0.161564	8.45571	7.0703	-0.710679	chr2L	16250158	16251622	1465	-	16	22	54	21	0.1818	0.1818	0.0996	0.12	0.072
PRL-1	5_Junction_5099_Junction_5100_Junction_5101	5_Junction_5099_Junction_5100_Junction_5101	J003	0.0220216	7.22242	0.00719987	0.0720329	11.8652	13.0858	0.53128	chr2L	16250158	16257074	6917	-	43	69	365	129	0.4886	0.5702	0.6734	0.7371	-0.17585
Rdl	5_Junction_51513_Junction_51514_Junction_51521	5_Junction_51513_Junction_51514_Junction_51521	J001	0.0117113	20.9239	4.77905e-06	0.000231416	7.11963	9.08662	0.989996	chr3L	9171879	9172283	405	-	23	18	54	35	0.0561	0.0466	0.153	0.1316	-0.09095
Rdl	5_Junction_51513_Junction_51514_Junction_51521	5_Junction_51513_Junction_51514_Junction_51521	J002	0.0351801	1.71952	0.189755	0.542482	8.73401	8.8506	0.0564351	chr3L	9171879	9172392	514	-	47	26	48	33	0.1146	0.0674	0.136	0.1241	-0.03905
Rdl	5_Junction_51513_Junction_51514_Junction_51521	5_Junction_51513_Junction_51514_Junction_51521	J003	0.027266	9.20847	0.00240898	0.0329639	16.0929	14.42	-0.705678	chr3L	9171879	9175145	3267	-	340	342	251	198	0.8293	0.886	0.711	0.7444	0.12995
CG40228	5_Junction_52911_Junction_52912_Junction_52913_Junction_52914	5_Junction_52911_Junction_52912_Junction_52913_Junction_52914	J001	0.0108168	36.6813	1.39109e-09	1.93624e-07	17.5906	15.3075	-0.955934	chr3LHet	2190418	2190547	130	-	279	622	378	288	0.6855	0.6761	0.4051	0.466	0.24525
CG40228	5_Junction_52911_Junction_52912_Junction_52913_Junction_52914	5_Junction_52911_Junction_52912_Junction_52913_Junction_52914	J002	0.037332	5.12039	0.0236463	0.158787	5.40518	7.27625	1.07723	chr3LHet	2190418	2190555	138	-	9	9	35	18	0.0221	0.0098	0.0375	0.0291	-0.01735
CG40228	5_Junction_52911_Junction_52912_Junction_52913_Junction_52914	5_Junction_52911_Junction_52912_Junction_52913_Junction_52914	J003	0.0113165	18.5661	1.64111e-05	0.000641306	13.4546	14.6242	0.498634	chr3LHet	2190418	2190560	143	-	71	199	334	204	0.1744	0.2163	0.358	0.3301	-0.1487
CG40228	5_Junction_52911_Junction_52912_Junction_52913_Junction_52914	5_Junction_52911_Junction_52912_Junction_52913_Junction_52914	J004	0.00970079	13.8754	0.000195339	0.00493306	11.1926	12.555	0.59946	chr3LHet	2190418	2190562	145	-	48	90	186	108	0.1179	0.0978	0.1994	0.1748	-0.07925
Ada2a	5_Junction_56740_Junction_56741	5_Junction_56740_Junction_56741	J001	0.0232043	19.798	8.60717e-06	0.000375266	10.5134	8.28581	-1.05332	chr3R	14079177	14079246	70	-	58	49	49	32	0.537	0.4188	0.2025	0.2092	0.27205
Ada2a	5_Junction_56740_Junction_56741	5_Junction_56740_Junction_56741	J002	0.0229766	19.9138	8.10155e-06	0.00035736	10.8585	12.63	0.781759	chr3R	14079177	14081037	1861	-	50	68	193	121	0.463	0.5812	0.7975	0.7908	-0.27205
kra	5_Junction_56911_Junction_56912_Junction_56913	5_Junction_56911_Junction_56912_Junction_56913	J001	0.174421	0.860891	0.35349	0.732269	4.37533	5.1728	0.555163	chr3R	1425086	1425758	673	-	3	4	10	29	0.0476	0.0571	0.0518	0.1676	-0.05735
kra	5_Junction_56911_Junction_56912_Junction_56913	5_Junction_56911_Junction_56912_Junction_56913	J002	0.0184803	6.49061	0.0108446	0.0952641	5.1029	6.55189	0.878697	chr3R	1425086	1426008	923	-	3	7	36	29	0.0476	0.1	0.1865	0.1676	-0.10325
kra	5_Junction_56911_Junction_56912_Junction_56913	5_Junction_56911_Junction_56912_Junction_56913	J003	0.0445656	6.15275	0.0131208	0.107876	12.0745	10.7089	-0.606984	chr3R	1425086	1426735	1650	-	57	59	147	115	0.9048	0.8429	0.7617	0.6647	0.16065
fru	5_Junction_56930_Junction_56931	5_Junction_56930_Junction_56931	J001	0.0270377	11.4746	0.000705541	0.0130547	8.31259	7.093	-0.62779	chr3R	14261512	14339171	77660	-	42	27	21	20	0.9333	0.871	0.6364	0.6452	0.26135
fru	5_Junction_56930_Junction_56931	5_Junction_56930_Junction_56931	J002	0.0297098	11.2084	0.00081427	0.0146421	3.21009	5.63015	1.82409	chr3R	14261512	14340772	79261	-	3	4	12	11	0.0667	0.129	0.3636	0.3548	-0.26135
IA-2	5_Junction_590_Junction_591	5_Junction_590_Junction_591	J001	0.0336962	5.43828	0.0197	0.141745	17.9748	16.887	-0.453309	chr2L	1034190	1042962	8773	-	887	717	314	392	0.764	0.6861	0.5461	0.6232	0.1404
IA-2	5_Junction_590_Junction_591	5_Junction_590_Junction_591	J002	0.0337209	5.4346	0.0197416	0.141913	14.6487	15.776	0.475619	chr2L	1034190	1046808	12619	-	274	328	261	237	0.236	0.3139	0.4539	0.3768	-0.1404
CG13624	5_Junction_63556_Junction_63557	5_Junction_63556_Junction_63557	J001	0.127187	4.04533	0.0442937	0.23827	8.1827	6.26161	-1.02512	chr3R	20388664	20397011	8348	-	38	24	14	18	0.623	0.4898	0.1818	0.4091	0.26095
CG13624	5_Junction_63556_Junction_63557	5_Junction_63556_Junction_63557	J002	0.126342	4.06714	0.0437253	0.236374	7.50294	9.37422	0.924168	chr3R	20388664	20402184	13521	-	23	25	63	26	0.377	0.5102	0.8182	0.5909	-0.26095
Lerp	5_Junction_65354_Junction_65355	5_Junction_65354_Junction_65355	J001	0.0114244	7.90561	0.00492817	0.0553162	10.6436	11.4621	0.366573	chr3R	22669297	22669375	79	-	91	88	51	96	0.65	0.6567	0.8226	0.7869	-0.1514
Lerp	5_Junction_65354_Junction_65355	5_Junction_65354_Junction_65355	J002	0.0116472	7.85693	0.00506264	0.0564359	8.68636	7.29496	-0.703797	chr3R	22669297	22669468	172	-	49	46	11	26	0.35	0.3433	0.1774	0.2131	0.1514
CG6330	5_Junction_65472_Junction_65473	5_Junction_65472_Junction_65473	J001	0.171229	12.068	0.000512935	0.0102473	7.06798	10.9799	1.89181	chr3R	22777620	22778724	1105	-	15	28	15	158	0.0482	0.1041	0.2885	0.5544	-0.3453
CG6330	5_Junction_65472_Junction_65473	5_Junction_65472_Junction_65473	J002	0.170482	12.1171	0.000499612	0.0100447	14.9405	10.9853	-1.71314	chr3R	22777620	22782240	4621	-	296	241	37	127	0.9518	0.8959	0.7115	0.4456	0.3453
CG17544	5_Junction_6975_Junction_6976_Junction_6977	5_Junction_6975_Junction_6976_Junction_6977	J001	0.0553203	0.0459103	0.830339	1	5.73392	5.82111	0.0529505	chr2L	19393656	19398333	4678	-	6	8	17	30	0.1818	0.3333	0.2179	0.3191	-0.01095
CG17544	5_Junction_6975_Junction_6976_Junction_6977	5_Junction_6975_Junction_6976_Junction_6977	J002	0.0487136	6.95207	0.00837224	0.0795118	5.17874	7.21659	1.1916	chr2L	19393656	19398345	4690	-	5	6	41	37	0.1515	0.25	0.5256	0.3936	-0.25885
CG17544	5_Junction_6975_Junction_6976_Junction_6977	5_Junction_6975_Junction_6976_Junction_6977	J003	0.0513097	7.03001	0.0080155	0.0773018	7.85188	5.85384	-1.09856	chr2L	19393656	19398349	4694	-	22	10	20	27	0.6667	0.4167	0.2564	0.2872	0.2699
CG9821	5_Junction_71130_Junction_71132	5_Junction_71130_Junction_71132	J001	0.128376	7.50435	0.00615501	0.0642454	22.7368	20.0733	-1.09952	chr3R	4644985	4645648	664	-	2584	2037	924	1544	0.9403	0.9297	0.6652	0.8549	0.17495
CG9821	5_Junction_71130_Junction_71132	5_Junction_71130_Junction_71132	J002	0.128485	7.49812	0.00617633	0.0643852	13.5037	16.1723	1.1299	chr3R	4644985	4646032	1048	-	164	154	465	262	0.0597	0.0703	0.3348	0.1451	-0.17495
pum	5_Junction_71578_Junction_71580_Junction_71582_Junction_71584	5_Junction_71578_Junction_71580_Junction_71582_Junction_71584	J001	0.136541	9.63196	0.0019122	0.0278257	3.7802	7.55242	2.3952	chr3R	5060386	5062326	1941	-	4	4	23	39	0.0139	0.0201	0.0676	0.1733	-0.10345
pum	5_Junction_71578_Junction_71580_Junction_71582_Junction_71584	5_Junction_71578_Junction_71580_Junction_71582_Junction_71584	J002	0.055922	3.27725	0.0702464	0.312809	14.6944	13.7696	-0.39349	chr3R	5060386	5062530	2145	-	235	168	264	144	0.816	0.8442	0.7765	0.64	0.12185
pum	5_Junction_71578_Junction_71580_Junction_71582_Junction_71584	5_Junction_71578_Junction_71580_Junction_71582_Junction_71584	J003	0.0251507	0.0199575	0.887656	1	5.87024	5.49916	-0.227867	chr3R	5060386	5062634	2249	-	10	12	15	12	0.0347	0.0603	0.0441	0.0533	-0.0012
pum	5_Junction_71578_Junction_71580_Junction_71582_Junction_71584	5_Junction_71578_Junction_71580_Junction_71582_Junction_71584	J004	0.0396827	0.207612	0.648646	0.935109	8.21314	7.93774	-0.138391	chr3R	5060386	5063335	2950	-	39	15	38	30	0.1354	0.0754	0.1118	0.1333	-0.01715
CG16779	5_Junction_71890_Junction_71891	5_Junction_71890_Junction_71891	J001	0.0260424	6.05489	0.0138678	0.112016	7.26753	5.95017	-0.737564	chr3R	5292353	5293074	722	-	38	17	11	12	0.6441	0.5862	0.44	0.3243	0.233
CG16779	5_Junction_71890_Junction_71891	5_Junction_71890_Junction_71891	J002	0.0261443	6.04642	0.0139345	0.112331	5.96372	7.27966	0.735919	chr3R	5292353	5293700	1348	-	21	12	14	25	0.3559	0.4138	0.56	0.6757	-0.233
NONE	5_Junction_79481_Junction_79482_Junction_79484	5_Junction_79481_Junction_79482_Junction_79484	J001	0.0134896	53.5265	2.55127e-13	8.3425e-11	21.6459	24.5329	1.18971	chrM	12828	12926	99	-	853	14028	151	1944	0.3718	0.3147	0.6681	0.6517	-0.31665
NONE	5_Junction_79481_Junction_79482_Junction_79484	5_Junction_79481_Junction_79482_Junction_79484	J002	0.0671037	0.00464106	0.945686	1	17.0714	16.2114	-0.359628	chrM	12828	12959	132	-	124	3859	22	165	0.0541	0.0866	0.0973	0.0553	-0.00595
NONE	5_Junction_79481_Junction_79482_Junction_79484	5_Junction_79481_Junction_79482_Junction_79484	J003	0.0105581	67.9194	1.70318e-16	1.16754e-13	23.8645	21.719	-0.884302	chrM	12828	13251	424	-	1317	26686	53	874	0.5741	0.5987	0.2345	0.293	0.32265
NONE	5_Junction_79608_Junction_79609	5_Junction_79608_Junction_79609	J001	0.288243	5.2575	0.0218524	0.150616	4.547	7.09603	1.56068	chrM	14011	14317	307	-	5	6	32	21	0.0431	0.0469	0.4638	0.1235	-0.24865
NONE	5_Junction_79608_Junction_79609	5_Junction_79608_Junction_79609	J002	0.284978	5.30953	0.0212091	0.147993	13.1887	10.3676	-1.24567	chrM	14011	15348	1338	-	111	122	37	149	0.9569	0.9531	0.5362	0.8765	0.24865
Smr	5_Junction_83302_Junction_83308	5_Junction_83302_Junction_83308	J001	0.0162059	52.4663	4.37695e-13	1.39907e-10	4.43678	8.84922	2.52953	chrX	12625939	12626383	445	-	8	7	45	26	0.0471	0.0551	0.3488	0.3881	-0.31735
Smr	5_Junction_83302_Junction_83308	5_Junction_83302_Junction_83308	J002	0.0156637	53.0743	3.21173e-13	1.04422e-10	12.5889	10.6572	-0.854711	chrX	12625939	12636350	10412	-	162	120	84	41	0.9529	0.9449	0.6512	0.6119	0.31735
para	5_Junction_89856_Junction_89857	5_Junction_89856_Junction_89857	J001	0.0672513	5.66722	0.0172848	0.129846	7.46861	9.04049	0.783453	chrX	16392929	16394538	1610	-	46	50	15	29	0.3898	0.5556	0.6818	0.7838	-0.2601
para	5_Junction_89856_Junction_89857	5_Junction_89856_Junction_89857	J002	0.0673912	5.65994	0.0173568	0.130197	7.84565	6.13196	-0.930431	chrX	16392929	16398021	5093	-	72	40	7	8	0.6102	0.4444	0.3182	0.2162	0.2601
arm	5_Junction_91579_Junction_91580	5_Junction_91579_Junction_91580	J001	0.0406001	10.0161	0.00155181	0.0238166	9.78449	11.5686	0.807608	chrX	1786152	1787434	1283	-	47	74	44	131	0.0829	0.1396	0.2378	0.262	-0.13865
arm	5_Junction_91579_Junction_91580	5_Junction_91579_Junction_91580	J002	0.0403894	10.0588	0.00151622	0.0234297	16.6747	15.1549	-0.638196	chrX	1786152	1788539	2388	-	520	456	141	369	0.9171	0.8604	0.7622	0.738	0.13865
kis	5_Junction_9262_Junction_9263	5_Junction_9262_Junction_9263	J001	0.431972	4.78705	0.0286745	0.179521	12.9994	8.82278	-1.88798	chr2L	228281	229171	891	-	122	76	41	80	0.9606	0.9268	0.3504	0.8421	0.34745
kis	5_Junction_9262_Junction_9263	5_Junction_9262_Junction_9263	J002	0.43377	4.76853	0.0289845	0.180925	4.80838	8.49341	2.09163	chr2L	228281	230536	2256	-	5	6	76	15	0.0394	0.0732	0.6496	0.1579	-0.34745
Rab5	5_Junction_9424_Junction_9425_Junction_9428	5_Junction_9424_Junction_9425_Junction_9428	J001	0.0637082	7.89101	0.00496812	0.0556439	10.3845	8.61102	-0.834543	chr2L	2361585	2364593	3009	-	46	55	28	70	0.4182	0.55	0.1818	0.28	0.2532
Rab5	5_Junction_9424_Junction_9425_Junction_9428	5_Junction_9424_Junction_9425_Junction_9428	J002	0.127477	12.3274	0.000446367	0.0092185	6.88092	11.2055	2.09402	chr2L	2361585	2364639	3055	-	18	13	105	106	0.1636	0.13	0.6818	0.424	-0.4061
Rab5	5_Junction_9424_Junction_9425_Junction_9428	5_Junction_9424_Junction_9425_Junction_9428	J003	0.110167	2.33199	0.12674	0.437338	9.52847	8.44348	-0.520964	chr2L	2361585	2364888	3304	-	46	32	21	74	0.4182	0.32	0.1364	0.296	0.1529

## Sheet: AS A3SS events
Gene	AS_event_ID	AS_structure_ID	sub_junction_ID	sub-junction_dispersion_estimate	LRT_statistic-full_vs_reduced	LRT_p_value-full_vs_reduced	BH_adjusted_p-values	DN1	LNd	fitting_parameter_log2fold_change_LNd_DN1	sub_junction_chr	sub_junction_start_coor	sub_junction_end_coor	sub_junction_size	sub_junction_strand	raw_count.DN1_A	raw_count.DN1_B	raw_count.LNd_A	raw_count.LNd_B	percentage_usage.DN1_A	percentage_usage.DN1_B	percentage_usage.LNd_A	percentage_usage.LNd_B	deltaPSI
Sxl	3_Junction_104148_Junction_104149	3_Junction_104148_Junction_104149	J001	0.0298353	10.0627	0.00151303	0.0234214	14.4222	13.1498	-0.543993	chrX	6979987	6981645	1659	-	236	191	113	213	0.9077	0.8489	0.7533	0.7245	0.1394
Sxl	3_Junction_104148_Junction_104149	3_Junction_104148_Junction_104149	J002	0.0303287	9.95205	0.0016067	0.0243907	8.07658	9.84038	0.84896	chrX	6980011	6981645	1635	-	24	34	37	81	0.0923	0.1511	0.2467	0.2755	-0.1394
CG33223	3_Junction_106338_Junction_106503	3_Junction_106338_Junction_106503	J001	0.0226295	39.8406	2.75554e-10	4.77993e-08	7.94071	2.95358	-3.35972	chrX	8370986	8513836	142851	-	37	45	3	1	0.4253	0.3689	0.0316	0.0435	0.35955
CG33223	3_Junction_106338_Junction_106503	3_Junction_106338_Junction_106503	J002	0.0218087	40.32	2.15587e-10	3.86949e-08	9.24934	11.3162	0.946868	chrX	8472924	8513836	40913	-	50	77	92	22	0.5747	0.6311	0.9684	0.9565	-0.35955
CG3714	3_Junction_10676_Junction_10678	3_Junction_10676_Junction_10678	J001	0.0410289	12.6728	0.000371007	0.00812423	6.33934	8.28318	1.03049	chr2L	4190824	4193308	2485	-	10	14	38	49	0.3125	0.4118	0.7917	0.6712	-0.3693
CG3714	3_Junction_10676_Junction_10678	3_Junction_10676_Junction_10678	J002	0.0417764	12.5741	0.000391132	0.00842006	7.82523	5.72773	-1.16146	chr2L	4192968	4193308	341	-	22	20	10	24	0.6875	0.5882	0.2083	0.3288	0.3693
ZAP3	3_Junction_108217_Junction_108218	3_Junction_108217_Junction_108218	J001	0.0375652	23.9313	9.98356e-07	6.13428e-05	8.71274	6.54388	-1.12548	chrX	9969103	9969175	73	-	35	23	24	21	0.9722	0.8846	0.4615	0.5526	0.42135
ZAP3	3_Junction_108217_Junction_108218	3_Junction_108217_Junction_108218	J002	0.0391349	23.606	1.1822e-06	7.10513e-05	2.85515	6.58614	2.74396	chrX	9969106	9969175	70	-	1	3	28	17	0.0278	0.1154	0.5385	0.4474	-0.42135
tkv	3_Junction_11623_Junction_11624_Junction_11627_Junction_11635_Junction_11672	3_Junction_11623_Junction_11624_Junction_11627_Junction_11635_Junction_11672	J001	0.0698503	2.44795	0.117678	0.418733	5.38507	4.7662	-0.41148	chr2L	5186515	5228765	42251	-	13	21	6	4	0.0691	0.1329	0.0368	0.0615	0.05185
tkv	3_Junction_11623_Junction_11624_Junction_11627_Junction_11635_Junction_11672	3_Junction_11623_Junction_11624_Junction_11627_Junction_11635_Junction_11672	J002	0.531677	0.660747	0.416296	0.789798	5.34184	4.35362	-0.680816	chr2L	5187380	5228765	41386	-	12	21	1	8	0.0638	0.1329	0.0061	0.1231	0.03375
tkv	3_Junction_11623_Junction_11624_Junction_11627_Junction_11635_Junction_11672	3_Junction_11623_Junction_11624_Junction_11627_Junction_11635_Junction_11672	J003	0.23963	0.892363	0.344838	0.724261	10.1268	13.2671	1.38963	chr2L	5187734	5228765	41032	-	114	80	139	34	0.6064	0.5063	0.8528	0.5231	-0.1316
tkv	3_Junction_11623_Junction_11624_Junction_11627_Junction_11635_Junction_11672	3_Junction_11623_Junction_11624_Junction_11627_Junction_11635_Junction_11672	J004	0.0352965	5.38508	0.0203096	0.144216	4.44431	3.12149	-1.11516	chr2L	5199064	5228765	29702	-	10	12	2	2	0.0532	0.0759	0.0123	0.0308	0.043
tkv	3_Junction_11623_Junction_11624_Junction_11627_Junction_11635_Junction_11672	3_Junction_11623_Junction_11624_Junction_11627_Junction_11635_Junction_11672	J005	0.138918	0.0644983	0.799522	0.995705	6.843	7.60672	0.406	chr2L	5219107	5228765	9659	-	39	24	15	17	0.2074	0.1519	0.092	0.2615	0.0029
Nckx30C	3_Junction_15160_Junction_15164	3_Junction_15160_Junction_15164	J001	0.0301164	17.8762	2.35748e-05	0.000873266	8.85199	10.8965	0.949304	chr2L	9722942	9727026	4085	-	50	31	74	75	0.3788	0.3605	0.7551	0.6356	-0.3257
Nckx30C	3_Junction_15160_Junction_15164	3_Junction_15160_Junction_15164	J002	0.0301925	17.8495	2.39081e-05	0.000884072	10.475	8.33697	-1.0105	chr2L	9722954	9727026	4073	-	82	55	24	43	0.6212	0.6395	0.2449	0.3644	0.3257
CG8963	3_Junction_18366_Junction_18367	3_Junction_18366_Junction_18367	J001	0.438342	5.14224	0.0233505	0.157675	9.74499	6.68576	-1.53673	chr2R	12906826	12906936	111	-	38	37	10	47	0.8636	0.9737	0.2703	0.7231	0.42195
CG8963	3_Junction_18366_Junction_18367	3_Junction_18366_Junction_18367	J002	0.442393	5.10452	0.0238636	0.159794	3.77667	6.46951	1.81253	chr2R	12906854	12906936	83	-	6	1	27	18	0.1364	0.0263	0.7297	0.2769	-0.42195
sbb	3_Junction_19405_Junction_19415	3_Junction_19405_Junction_19415	J001	0.0397413	3.86836	0.0492044	0.252967	9.89316	8.94031	-0.449267	chr2R	14177355	14243003	65649	-	71	65	30	37	0.7978	0.8228	0.5769	0.74	0.15185
sbb	3_Junction_19405_Junction_19415	3_Junction_19405_Junction_19415	J002	0.0410755	3.80294	0.0511626	0.259235	5.84312	7.15937	0.744206	chr2R	14193640	14243003	49364	-	18	14	22	13	0.2022	0.1772	0.4231	0.26	-0.15185
CG30116	3_Junction_19551_Junction_19555	3_Junction_19551_Junction_19555	J001	0.0535401	6.55561	0.0104554	0.093183	13.9224	12.6066	-0.566141	chr2R	14345103	14348069	2967	-	314	210	55	146	0.9155	0.8714	0.6962	0.8066	0.14205
CG30116	3_Junction_19551_Junction_19555	3_Junction_19551_Junction_19555	J002	0.0543046	6.49152	0.010839	0.0952298	7.19599	8.84982	0.835513	chr2R	14345975	14348069	2095	-	29	31	24	35	0.0845	0.1286	0.3038	0.1934	-0.14205
Ars2	3_Junction_23466_Junction_23467	3_Junction_23466_Junction_23467	J001	0.0210317	6.46147	0.0110239	0.0962834	11.5516	12.6503	0.481271	chr2R	1968539	1969239	701	-	150	101	57	149	0.3464	0.2806	0.4222	0.4853	-0.14025
Ars2	3_Junction_23466_Junction_23467	3_Junction_23466_Junction_23467	J002	0.0209796	6.47363	0.0109487	0.0958972	14.1442	13.1488	-0.426199	chr2R	1968920	1969239	320	-	283	259	78	158	0.6536	0.7194	0.5778	0.5147	0.14025
mim	3_Junction_25270_Junction_25318_Junction_25593	3_Junction_25270_Junction_25318_Junction_25593	J001	0.019376	9.1289	0.00251603	0.0340277	6.10943	3.69204	-1.67676	chr2R	2586533	2845821	259289	-	31	23	2	3	0.2844	0.2644	0.0645	0.1	0.19215
mim	3_Junction_25270_Junction_25318_Junction_25593	3_Junction_25270_Junction_25318_Junction_25593	J002	0.0180753	5.77759	0.0162318	0.124429	7.88287	9.00047	0.550936	chr2R	2624558	2845821	221264	-	56	49	24	21	0.5138	0.5632	0.7742	0.7	-0.1986
mim	3_Junction_25270_Junction_25318_Junction_25593	3_Junction_25270_Junction_25318_Junction_25593	J003	0.0206542	0.0142878	0.904854	1	5.2232	5.23811	0.00969379	chr2R	2839052	2845821	6770	-	22	15	5	6	0.2018	0.1724	0.1613	0.2	0.00645
Dscam1	3_Junction_25885_Junction_25886	3_Junction_25885_Junction_25886	J001	0.0199823	16.2624	5.51485e-05	0.00177276	6.04585	8.31532	1.21695	chr2R	3213869	3216792	2924	-	29	20	15	24	0.2248	0.1695	0.5	0.4898	-0.29775
Dscam1	3_Junction_25885_Junction_25886	3_Junction_25885_Junction_25886	J002	0.0193979	16.4269	5.05637e-05	0.00165341	10.0057	8.38618	-0.771218	chr2R	3214289	3216792	2504	-	100	98	15	25	0.7752	0.8305	0.5	0.5102	0.29775
Dscam1	3_Junction_26053_Junction_26057_Junction_26066	3_Junction_26053_Junction_26057_Junction_26066	J001	0.022446	27.0614	1.97092e-07	1.47358e-05	7.44306	4.4636	-1.80501	chr2R	3250699	3255891	5193	-	27	22	5	9	0.7105	0.6875	0.1852	0.2093	0.50175
Dscam1	3_Junction_26053_Junction_26057_Junction_26066	3_Junction_26053_Junction_26057_Junction_26066	J002	0.0344341	1.95614	0.161927	0.498845	4.60812	5.63332	0.678524	chr2R	3250995	3255891	4897	-	6	9	10	14	0.1579	0.2812	0.3704	0.3256	-0.12845
Dscam1	3_Junction_26053_Junction_26057_Junction_26066	3_Junction_26053_Junction_26057_Junction_26066	J003	0.0357726	18.1164	2.07808e-05	0.000786671	3.02078	6.31796	2.41993	chr2R	3254132	3255891	1760	-	5	1	12	20	0.1316	0.0312	0.4444	0.4651	-0.37335
Aldh-III	3_Junction_26166_Junction_26170	3_Junction_26166_Junction_26170	J001	0.0197754	50.315	1.30944e-12	3.67012e-10	19.1982	16.9435	-0.937527	chr2R	3354555	3354986	432	-	1185	1337	241	418	0.9472	0.9646	0.8033	0.7992	0.15465
Aldh-III	3_Junction_26166_Junction_26170	3_Junction_26166_Junction_26170	J002	0.0199477	50.0049	1.53359e-12	4.27729e-10	8.86769	12.2316	1.53289	chr2R	3354821	3354986	166	-	66	49	59	105	0.0528	0.0354	0.1967	0.2008	-0.15465
Mob2	3_Junction_35624_Junction_35634	3_Junction_35624_Junction_35634	J001	0.0375211	7.02459	0.00803978	0.0773616	12.2962	11.1901	-0.487912	chr3L	11520442	11554992	34551	-	91	61	111	152	0.9479	0.8841	0.7655	0.8216	0.12245
Mob2	3_Junction_35624_Junction_35634	3_Junction_35624_Junction_35634	J002	0.038766	6.91455	0.00854973	0.0807526	5.26363	7.13744	1.09415	chr3L	11547218	11554992	7775	-	5	8	34	33	0.0521	0.1159	0.2345	0.1784	-0.12245
app	3_Junction_36133_Junction_36136	3_Junction_36133_Junction_36136	J001	0.0339356	4.09186	0.0430901	0.234209	5.29596	6.47873	0.711449	chr3L	12214382	12257719	43338	-	10	15	12	16	0.2632	0.3571	0.4615	0.5926	-0.2169
app	3_Junction_36133_Junction_36136	3_Junction_36133_Junction_36136	J002	0.0330949	4.12637	0.0422199	0.23109	7.24692	6.22916	-0.562836	chr3L	12233774	12257719	23946	-	28	27	14	11	0.7368	0.6429	0.5385	0.4074	0.2169
pHCl	3_Junction_38534_Junction_38538	3_Junction_38534_Junction_38538	J001	0.0346655	6.51261	0.0107112	0.0946231	12.9844	11.7352	-0.544806	chr3L	15845797	15852910	7114	-	142	127	112	95	0.5941	0.7095	0.4392	0.4922	0.1861
pHCl	3_Junction_38534_Junction_38538	3_Junction_38534_Junction_38538	J002	0.0346953	6.50832	0.0107371	0.0947	10.9993	12.2915	0.571216	chr3L	15851251	15852910	1660	-	97	52	143	98	0.4059	0.2905	0.5608	0.5078	-0.1861
tra	3_Junction_39321_Junction_39322	3_Junction_39321_Junction_39322	J001	0.179932	7.3716	0.00662618	0.0676416	8.7601	6.21506	-1.33605	chr3L	16583855	16584102	248	-	30	16	30	19	0.8333	0.6957	0.4762	0.2088	0.422
tra	3_Junction_39321_Junction_39322	3_Junction_39321_Junction_39322	J002	0.179531	7.38459	0.00657849	0.0672786	5.45742	8.0006	1.41823	chr3L	16584030	16584102	73	-	6	7	33	72	0.1667	0.3043	0.5238	0.7912	-0.422
CG14182	3_Junction_41763_Junction_41868	3_Junction_41763_Junction_41868	J001	0.0257307	12.6708	0.000371416	0.00812787	6.06066	3.52573	-1.79262	chr3L	19972892	20016781	43890	-	33	15	3	2	0.55	0.5	0.1579	0.1333	0.3794
CG14182	3_Junction_41763_Junction_41868	3_Junction_41763_Junction_41868	J002	0.0250923	12.7417	0.000357596	0.0079137	5.74661	7.43135	0.946459	chr3L	20009236	20016781	7546	-	27	15	16	13	0.45	0.5	0.8421	0.8667	-0.3794
dikar	3_Junction_48906_Junction_48907	3_Junction_48906_Junction_48907	J001	0.0111765	8.59881	0.00336384	0.0420827	8.55615	9.73421	0.56181	chr3L	6730772	6731802	1031	-	61	47	23	49	0.4207	0.4234	0.6053	0.6282	-0.1947
dikar	3_Junction_48906_Junction_48907	3_Junction_48906_Junction_48907	J002	0.0111621	8.60234	0.00335731	0.0420381	9.50335	8.26808	-0.595949	chr3L	6731198	6731802	605	-	84	64	15	29	0.5793	0.5766	0.3947	0.3718	0.1947
Pdp1	3_Junction_49876_Junction_49881	3_Junction_49876_Junction_49881	J001	0.0221451	108.883	1.72138e-25	2.96792e-22	5.39682	10.543	2.66615	chr3L	7824927	7825652	726	-	18	21	55	17	0.1385	0.1654	0.9483	0.9444	-0.7944
Pdp1	3_Junction_49876_Junction_49881	3_Junction_49876_Junction_49881	J002	0.0217794	109.523	1.24645e-25	2.28772e-22	10.1385	3.30958	-4.06499	chr3L	7825021	7825652	632	-	112	106	3	1	0.8615	0.8346	0.0517	0.0556	0.7944
GstO2	3_Junction_50593_Junction_50595	3_Junction_50593_Junction_50595	J001	0.0291738	6.64846	0.00992416	0.0897838	9.77799	8.39348	-0.662162	chr3L	8515418	8516499	1082	-	81	82	25	19	0.2355	0.179	0.1269	0.0876	0.1
GstO2	3_Junction_50593_Junction_50595	3_Junction_50593_Junction_50595	J002	0.028893	6.69026	0.00969411	0.0882929	14.2929	15.2681	0.412867	chr3L	8516321	8516499	179	-	263	376	172	198	0.7645	0.821	0.8731	0.9124	-0.1
Bet3	3_Junction_51895_Junction_51896	3_Junction_51895_Junction_51896	J001	0.0226099	10.2955	0.00133352	0.0213187	10.9656	9.75574	-0.552318	chr3L	9432660	9435222	2563	-	82	90	33	66	0.8454	0.8411	0.7174	0.6055	0.1818
Bet3	3_Junction_51895_Junction_51896	3_Junction_51895_Junction_51896	J002	0.0233648	10.1331	0.00145632	0.0227711	6.09484	8.0193	1.04016	chr3L	9435066	9435222	157	-	15	17	13	43	0.1546	0.1589	0.2826	0.3945	-0.1818
CG40178	3_Junction_52772_Junction_52779	3_Junction_52772_Junction_52779	J001	0.0413884	8.89743	0.00285572	0.0372014	10.6872	12.2165	0.678933	chr3LHet	1360849	1396240	35392	-	90	91	92	85	0.687	0.5796	0.8679	0.8019	-0.2016
CG40178	3_Junction_52772_Junction_52779	3_Junction_52772_Junction_52779	J002	0.041833	8.83547	0.00295432	0.0381891	9.08705	7.16123	-0.96796	chr3LHet	1390876	1396240	5365	-	41	66	14	21	0.313	0.4204	0.1321	0.1981	0.2016
CG42788	3_Junction_53898_Junction_53917_Junction_53927_Junction_53929	3_Junction_53898_Junction_53917_Junction_53927_Junction_53929	J001	0.0181581	14.3685	0.000150292	0.00402153	5.91937	7.1804	0.709652	chr3R	10894011	10938137	44127	-	17	19	18	15	0.0837	0.0731	0.2609	0.1948	-0.14945
CG42788	3_Junction_53898_Junction_53917_Junction_53927_Junction_53929	3_Junction_53898_Junction_53917_Junction_53927_Junction_53929	J002	0.124389	13.2546	0.000271913	0.00641153	6.04093	8.87289	1.49241	chr3R	10905253	10938137	32885	-	21	17	20	42	0.1034	0.0654	0.2899	0.5455	-0.3333
CG42788	3_Junction_53898_Junction_53917_Junction_53927_Junction_53929	3_Junction_53898_Junction_53917_Junction_53927_Junction_53929	J003	0.147723	12.6132	0.000383031	0.00830923	12.7623	7.96904	-2.20716	chr3R	10916188	10938137	21950	-	144	211	28	13	0.7094	0.8115	0.4058	0.1688	0.47315
CG42788	3_Junction_53898_Junction_53917_Junction_53927_Junction_53929	3_Junction_53898_Junction_53917_Junction_53927_Junction_53929	J004	0.0915736	0.0289568	0.864879	1	5.75918	4.33924	-0.952016	chr3R	10917083	10938137	21055	-	21	13	3	7	0.1034	0.05	0.0435	0.0909	0.0095
mtd	3_Junction_54547_Junction_54584	3_Junction_54547_Junction_54584	J001	0.00502585	25.9822	3.4458e-07	2.39677e-05	13.3963	11.9621	-0.622323	chr3R	1160782	1175188	14407	-	262	185	55	104	0.5137	0.5096	0.3216	0.323	0.18935
mtd	3_Junction_54547_Junction_54584	3_Junction_54547_Junction_54584	J002	0.00501873	25.9982	3.41737e-07	2.38196e-05	13.2362	14.4344	0.511977	chr3R	1162357	1175188	12832	-	248	178	116	218	0.4863	0.4904	0.6784	0.677	-0.18935
fru	3_Junction_56906_Junction_56915	3_Junction_56906_Junction_56915	J001	0.0278578	18.3192	1.86814e-05	0.000718187	6.42778	3.26788	-2.24078	chr3R	14248904	14256552	7649	-	21	26	1	4	0.3684	0.4407	0.0476	0.0889	0.3363
fru	3_Junction_56906_Junction_56915	3_Junction_56906_Junction_56915	J002	0.0264359	18.5799	1.6293e-05	0.000638447	7.43439	9.05515	0.808353	chr3R	14252888	14256552	3665	-	36	33	20	41	0.6316	0.5593	0.9524	0.9111	-0.3363
Stat92E	3_Junction_59056_Junction_59057	3_Junction_59056_Junction_59057	J001	0.0262183	47.5411	5.38627e-12	1.35006e-09	9.64639	6.29286	-1.71262	chr3R	16363678	16364941	1264	-	52	49	16	16	0.8387	0.8033	0.3137	0.2192	0.55455
Stat92E	3_Junction_59056_Junction_59057	3_Junction_59056_Junction_59057	J002	0.0263277	47.4572	5.62182e-12	1.39681e-09	5.48537	9.1964	1.98548	chr3R	16364437	16364941	505	-	10	12	35	57	0.1613	0.1967	0.6863	0.7808	-0.55455
CG31064	3_Junction_65673_Junction_65677	3_Junction_65673_Junction_65677	J001	0.0174009	7.63581	0.00572207	0.0611167	5.89297	7.53358	0.911319	chr3R	23056387	23058193	1807	-	11	12	23	36	0.1209	0.1765	0.3067	0.288	-0.14865
CG31064	3_Junction_65673_Junction_65677	3_Junction_65673_Junction_65677	J002	0.0167957	7.72833	0.00543611	0.0589702	10.9768	10.1054	-0.395616	chr3R	23057921	23058193	273	-	80	56	52	89	0.8791	0.8235	0.6933	0.712	0.14865
mura	3_Junction_72009_Junction_72011	3_Junction_72009_Junction_72011	J001	0.0156853	22.8654	1.73749e-06	9.89569e-05	8.09384	4.78397	-1.91016	chr3R	5367731	5372518	4788	-	42	30	7	7	0.1409	0.1415	0.0252	0.0473	0.10495
mura	3_Junction_72009_Junction_72011	3_Junction_72009_Junction_72011	J002	0.014908	23.2716	1.4066e-06	8.22521e-05	13.8234	14.9225	0.467011	chr3R	5368646	5372518	3873	-	256	182	271	141	0.8591	0.8585	0.9748	0.9527	-0.10495
FoxP	3_Junction_72231_Junction_72232_Junction_72233	3_Junction_72231_Junction_72232_Junction_72233	J001	0.0331308	1.6927	0.193245	0.546801	9.53553	9.34912	-0.0877626	chr3R	5551897	5553710	1814	-	70	66	50	14	0.2147	0.3056	0.3425	0.35	-0.0861
FoxP	3_Junction_72231_Junction_72232_Junction_72233	3_Junction_72231_Junction_72232_Junction_72233	J002	0.223043	7.85453	0.00506936	0.0564381	12.2233	6.19943	-2.92641	chr3R	5551911	5553710	1800	-	201	119	10	12	0.6166	0.5509	0.0685	0.3	0.3995
FoxP	3_Junction_72231_Junction_72232_Junction_72233	3_Junction_72231_Junction_72232_Junction_72233	J003	0.0777774	13.045	0.000304088	0.00702464	8.12619	10.9381	1.32472	chr3R	5552735	5553710	976	-	55	31	86	14	0.1687	0.1435	0.589	0.35	-0.3134
Arl4	3_Junction_77547_Junction_77549	3_Junction_77547_Junction_77549	J001	0.0119813	14.2306	0.000161718	0.00424608	9.67437	7.87581	-0.873192	chr4	199462	199561	100	-	31	42	35	46	0.301	0.2428	0.1301	0.1271	0.1433
Arl4	3_Junction_77547_Junction_77549	3_Junction_77547_Junction_77549	J002	0.0117374	14.3481	0.000151929	0.00404481	13.0132	13.9551	0.404089	chr4	199506	199561	56	-	72	131	234	316	0.699	0.7572	0.8699	0.8729	-0.1433
dpr7	3_Junction_77739_Junction_77740	3_Junction_77739_Junction_77740	J001	0.0543139	4.65515	0.0309605	0.189481	7.4675	5.67958	-1.00637	chr4	273509	273825	317	-	11	17	30	10	0.2821	0.4474	0.1508	0.2273	0.1757
dpr7	3_Junction_77739_Junction_77740	3_Junction_77739_Junction_77740	J002	0.0527174	4.74387	0.0294028	0.182637	9.05202	10.4259	0.640285	chr4	273639	273825	187	-	28	21	169	34	0.7179	0.5526	0.8492	0.7727	-0.1757
NONE	3_Junction_79425_Junction_79588_Junction_79590_Junction_79592	3_Junction_79425_Junction_79588_Junction_79590_Junction_79592	J001	0.043547	10.8882	0.000967793	0.016742	8.40502	10.2725	0.884507	chrM	11413	14616	3204	-	71	26	10	89	0.0276	0.0495	0.102	0.1092	-0.06705
NONE	3_Junction_79425_Junction_79588_Junction_79590_Junction_79592	3_Junction_79425_Junction_79588_Junction_79590_Junction_79592	J002	0.186634	0.447739	0.503411	0.852431	18.8985	16.4471	-1.02081	chrM	13350	14616	1267	-	2037	343	47	619	0.792	0.6533	0.4796	0.7595	0.1031
NONE	3_Junction_79425_Junction_79588_Junction_79590_Junction_79592	3_Junction_79425_Junction_79588_Junction_79590_Junction_79592	J003	0.241088	0.0078498	0.929401	1	14.1164	11.4494	-1.15647	chrM	13424	14616	1193	-	442	142	39	99	0.1719	0.2705	0.398	0.1215	-0.03855
NONE	3_Junction_79425_Junction_79588_Junction_79590_Junction_79592	3_Junction_79425_Junction_79588_Junction_79590_Junction_79592	J004	0.164434	0.0563974	0.812283	0.999779	5.79198	4.37717	-0.943686	chrM	13459	14616	1158	-	22	14	2	8	0.0086	0.0267	0.0204	0.0098	0.00255
CR44894	3_Junction_80053_Junction_80078_Junction_80095	3_Junction_80053_Junction_80078_Junction_80095	J001	0.499521	4.62476	0.0315137	0.191911	7.98065	3.65028	-2.72461	chrX	10003720	10045146	41427	-	29	29	4	5	0.1835	0.4143	0.0086	0.1064	0.2414
CR44894	3_Junction_80053_Junction_80078_Junction_80095	3_Junction_80053_Junction_80078_Junction_80095	J002	0.626256	1.05145	0.305174	0.683277	10.5324	8.39265	-1.00905	chrX	10029196	10045146	15951	-	114	27	38	27	0.7215	0.3857	0.0815	0.5745	0.2256
CR44894	3_Junction_80053_Junction_80078_Junction_80095	3_Junction_80053_Junction_80078_Junction_80095	J003	0.654856	3.70903	0.0541188	0.268433	6.12386	14.9864	4.15532	chrX	10041451	10045146	3696	-	15	14	424	15	0.0949	0.2	0.9099	0.3191	-0.46705
CG1637	3_Junction_81413_Junction_81422	3_Junction_81413_Junction_81422	J001	0.00839171	14.2342	0.000161413	0.00424004	11.7054	12.7313	0.448435	chrX	10766072	10771446	5375	-	115	92	81	182	0.5838	0.5644	0.7364	0.7552	-0.1717
CG1637	3_Junction_81413_Junction_81422	3_Junction_81413_Junction_81422	J002	0.00846029	14.1868	0.000165526	0.0043263	10.7323	9.26064	-0.679832	chrX	10770029	10771446	1418	-	82	71	29	59	0.4162	0.4356	0.2636	0.2448	0.1717
Rbp1-like	3_Junction_84073_Junction_84097	3_Junction_84073_Junction_84097	J001	0.131454	9.56425	0.00198403	0.0286438	12.8777	10.0678	-1.24884	chrX	13275076	13278331	3256	-	261	163	21	63	0.3325	0.2753	0.0421	0.123	0.22135
Rbp1-like	3_Junction_84073_Junction_84097	3_Junction_84073_Junction_84097	J002	0.131193	9.58189	0.00196506	0.0284205	15.6552	18.4511	1.16736	chrX	13277656	13278331	676	-	524	429	478	449	0.6675	0.7247	0.9579	0.877	-0.22135
Cngl	3_Junction_88003_Junction_88004	3_Junction_88003_Junction_88004	J001	0.02449	7.7727	0.00530417	0.0580942	5.36496	3.19741	-1.66975	chrX	15289140	15290430	1291	-	17	12	1	4	0.1589	0.1714	0.04	0.0471	0.1216
Cngl	3_Junction_88003_Junction_88004	3_Junction_88003_Junction_88004	J002	0.0218537	7.97419	0.0047449	0.0537572	9.79856	10.5196	0.33109	chrX	15289224	15290430	1207	-	90	58	24	81	0.8411	0.8286	0.96	0.9529	-0.1216
Cngl	3_Junction_88021_Junction_88032	3_Junction_88021_Junction_88032	J001	0.0425679	14.8958	0.000113613	0.00320648	5.99138	7.90878	1.04529	chrX	15296988	15304863	7876	-	28	13	15	25	0.5185	0.3939	0.9375	0.8333	-0.4292
Cngl	3_Junction_88021_Junction_88032	3_Junction_88021_Junction_88032	J002	0.043941	14.7478	0.000122894	0.00340257	6.29581	3.58611	-1.8763	chrX	15302606	15304863	2258	-	26	20	1	5	0.4815	0.6061	0.0625	0.1667	0.4292
mmd	3_Junction_88949_Junction_88957_Junction_88962	3_Junction_88949_Junction_88957_Junction_88962	J001	0.104007	1.63943	0.200404	0.556295	15.7459	12.788	-1.25928	chrX	15852623	15856017	3395	-	245	168	128	334	0.8566	0.8276	0.6368	0.8227	0.11235
mmd	3_Junction_88949_Junction_88957_Junction_88962	3_Junction_88949_Junction_88957_Junction_88962	J002	0.189806	0.00495876	0.943861	1	10.0275	8.00137	-0.973374	chrX	15854945	15856017	1073	-	39	34	55	34	0.1364	0.1675	0.2736	0.0837	-0.0267
mmd	3_Junction_88949_Junction_88957_Junction_88962	3_Junction_88949_Junction_88957_Junction_88962	J003	0.0180726	35.6264	2.39028e-09	3.18501e-07	2.72724	6.51983	2.84588	chrX	15855958	15856017	60	-	2	1	18	38	0.007	0.0049	0.0896	0.0936	-0.08565
if	3_Junction_90220_Junction_90339	3_Junction_90220_Junction_90339	J001	0.120449	4.42067	0.0355061	0.207029	6.37643	4.17425	-1.44066	chrX	16655108	16827820	172713	-	37	88	2	1	0.4868	0.6984	0.2	0.25	0.3676
if	3_Junction_90220_Junction_90339	3_Junction_90220_Junction_90339	J002	0.121263	4.40711	0.0357895	0.208191	5.16351	7.25567	1.22232	chrX	16762327	16827820	65494	-	39	38	8	3	0.5132	0.3016	0.8	0.75	-0.3676
kis	3_Junction_9263_Junction_9367	3_Junction_9263_Junction_9367	J001	0.185446	9.88542	0.00166594	0.0250692	4.87951	8.36492	1.97942	chr2L	228281	230536	2256	-	5	6	76	15	0.2174	0.1765	0.8352	0.5357	-0.4885
kis	3_Junction_9263_Junction_9367	3_Junction_9263_Junction_9367	J002	0.186713	9.83229	0.00171474	0.0256477	8.57043	5.06904	-1.95275	chr2L	229977	230536	560	-	18	28	15	13	0.7826	0.8235	0.1648	0.4643	0.4885
Syt1	3_Junction_9709_Junction_9711	3_Junction_9709_Junction_9711	J001	0.0195232	9.46701	0.002092	0.0296829	15.0066	13.827	-0.501026	chr2L	2787162	2792193	5032	-	348	276	132	185	0.5686	0.552	0.443	0.3504	0.1636
Syt1	3_Junction_9709_Junction_9711	3_Junction_9709_Junction_9711	J002	0.0195205	9.46809	0.00209077	0.0296803	14.1777	15.3393	0.491851	chr2L	2787168	2792193	5026	-	264	224	166	343	0.4314	0.448	0.557	0.6496	-0.1636
rg	5_Junction_101426_Junction_101430_Junction_101431	5_Junction_101426_Junction_101430_Junction_101431	J001	0.107116	3.84697	0.049836	0.254946	13.5299	11.6323	-0.82487	chrX	4982724	5036453	53730	+	184	348	80	29	0.6917	0.7682	0.625	0.3766	0.22915
rg	5_Junction_101426_Junction_101430_Junction_101431	5_Junction_101426_Junction_101430_Junction_101431	J002	0.0204761	2.6064	0.106433	0.395894	9.63539	9.6796	0.0206434	chrX	4982724	5067499	84776	+	68	95	36	28	0.2556	0.2097	0.2812	0.3636	-0.08975
rg	5_Junction_101426_Junction_101430_Junction_101431	5_Junction_101426_Junction_101430_Junction_101431	J003	0.190325	5.81223	0.0159151	0.122942	4.59633	7.542	1.76061	chrX	4982724	5070891	88168	+	14	10	12	20	0.0526	0.0221	0.0938	0.2597	-0.1394
SK	5_Junction_101839_Junction_101840	5_Junction_101839_Junction_101840	J001	0.146712	15.8977	6.68604e-05	0.00209596	7.61006	10.9967	1.61364	chrX	5247037	5249978	2942	+	55	14	27	106	0.5556	0.2979	0.871	0.9381	-0.4778
SK	5_Junction_101839_Junction_101840	5_Junction_101839_Junction_101840	J002	0.14817	15.7778	7.12339e-05	0.00220992	8.00135	4.47087	-2.0864	chrX	5247037	5270079	23043	+	44	33	4	7	0.4444	0.7021	0.129	0.0619	0.4778
Plc21C	5_Junction_10226_Junction_10227	5_Junction_10226_Junction_10227	J001	0.0460262	3.8239	0.0505265	0.257221	6.60948	7.89044	0.680521	chr2L	344489	344553	65	+	31	22	10	30	0.3263	0.2316	0.3704	0.5263	-0.1694
Plc21C	5_Junction_10226_Junction_10227	5_Junction_10226_Junction_10227	J002	0.0451964	3.86749	0.0492302	0.252985	9.33612	8.23497	-0.533617	chr2L	344489	344574	86	+	64	73	17	27	0.6737	0.7684	0.6296	0.4737	0.1694
l(1)G0255	5_Junction_103398_Junction_103399	5_Junction_103398_Junction_103399	J001	0.156578	5.41325	0.0199845	0.14299	6.30371	4.1824	-1.39275	chrX	6572649	6572788	140	+	15	21	7	3	0.1531	0.236	0.0909	0.0203	0.13895
l(1)G0255	5_Junction_103398_Junction_103399	5_Junction_103398_Junction_103399	J002	0.151779	5.53768	0.0186112	0.136459	10.3839	12.3428	0.871732	chrX	6572649	6573857	1209	+	83	68	70	145	0.8469	0.764	0.9091	0.9797	-0.13895
CG11266	5_Junction_12998_Junction_13001_Junction_13002	5_Junction_12998_Junction_13001_Junction_13002	J001	0.00974739	25.6231	4.15042e-07	2.83149e-05	14.1042	13.3136	-0.338288	chr2L	7033018	7034197	1180	+	141	154	258	158	0.8393	0.8603	0.6386	0.6723	0.19435
CG11266	5_Junction_12998_Junction_13001_Junction_13002	5_Junction_12998_Junction_13001_Junction_13002	J002	0.0620627	13.3225	0.000262246	0.00623528	6.50394	10.7479	2.09777	chr2L	7033018	7035073	2056	+	12	13	134	47	0.0714	0.0726	0.3317	0.2	-0.19385
CG11266	5_Junction_12998_Junction_13001_Junction_13002	5_Junction_12998_Junction_13001_Junction_13002	J003	0.218736	0.0722966	0.788022	0.991674	6.68743	6.12391	-0.320777	chr2L	7033018	7035405	2388	+	15	12	12	30	0.0893	0.067	0.0297	0.1277	-0.00055
CG13384	5_Junction_14263_Junction_14265	5_Junction_14263_Junction_14265	J001	0.0653886	7.76324	0.00533202	0.0582967	6.4855	8.39973	1.00509	chr2L	8384895	8384995	101	+	13	25	33	25	0.1121	0.2174	0.44	0.3521	-0.2313
CG13384	5_Junction_14263_Junction_14265	5_Junction_14263_Junction_14265	J002	0.0642766	7.85438	0.00506977	0.0564381	11.2238	9.5909	-0.74476	chr2L	8384895	8386215	1321	+	103	90	42	46	0.8879	0.7826	0.56	0.6479	0.2313
Gpb5	5_Junction_15584_Junction_15585	5_Junction_15584_Junction_15585	J001	0.129273	4.52434	0.0334159	0.199273	12.3156	13.9462	0.702919	chr2LHet	167315	167374	60	+	88	45	306	390	0.8224	0.8182	0.9684	0.9028	-0.1153
Gpb5	5_Junction_15584_Junction_15585	5_Junction_15584_Junction_15585	J002	0.131432	4.46988	0.0344974	0.203485	7.62321	5.88618	-0.961843	chr2LHet	167315	167382	68	+	19	10	10	42	0.1776	0.1818	0.0316	0.0972	0.1153
CG10737	5_Junction_20116_Junction_20117	5_Junction_20116_Junction_20117	J001	0.0102889	76.722	1.96794e-18	1.71641e-15	8.02353	11.8366	1.77558	chr2R	15064248	15064444	197	+	49	48	47	81	0.0787	0.0826	0.3241	0.3803	-0.27155
CG10737	5_Junction_20116_Junction_20117	5_Junction_20116_Junction_20117	J002	0.0101418	77.2606	1.49828e-18	1.3975e-15	15.8975	13.8222	-0.878224	chr2R	15064248	15065322	1075	+	574	533	98	132	0.9213	0.9174	0.6759	0.6197	0.27155
ITP	5_Junction_24353_Junction_24354	5_Junction_24353_Junction_24354	J001	0.281531	55.5142	9.27843e-14	3.23874e-11	16.4242	5.06066	-5.4214	chr2R	20443094	20443805	712	+	74	38	82	42	0.8506	0.623	0.0016	0.0063	0.73285
ITP	5_Junction_24353_Junction_24354	5_Junction_24353_Junction_24354	J002	0.280413	55.7287	8.31956e-14	2.94011e-11	12.7047	24.9814	5.12066	chr2R	20443094	20445551	2458	+	13	23	50440	6620	0.1494	0.377	0.9984	0.9937	-0.73285
kuz	5_Junction_3759_Junction_3761_Junction_3771_Junction_3779	5_Junction_3759_Junction_3761_Junction_3771_Junction_3779	J001	0.0737471	7.06341	0.0078674	0.0764054	7.68876	5.13981	-1.464	chr2L	13599251	13605478	6228	+	37	27	8	8	0.2372	0.1957	0.043	0.1231	0.1334
kuz	5_Junction_3759_Junction_3761_Junction_3771_Junction_3779	5_Junction_3759_Junction_3761_Junction_3771_Junction_3779	J002	0.0811052	2.34075	0.126029	0.43612	9.67901	8.95309	-0.343569	chr2L	13599251	13611343	12093	+	51	72	44	20	0.3269	0.5217	0.2366	0.3077	0.15215
kuz	5_Junction_3759_Junction_3761_Junction_3771_Junction_3779	5_Junction_3759_Junction_3761_Junction_3771_Junction_3779	J003	0.169831	0.192881	0.660529	0.939246	7.84949	7.43552	-0.213656	chr2L	13599251	13643327	44077	+	49	20	22	17	0.3141	0.1449	0.1183	0.2615	0.0396
kuz	5_Junction_3759_Junction_3761_Junction_3771_Junction_3779	5_Junction_3759_Junction_3761_Junction_3771_Junction_3779	J004	0.140445	8.74419	0.0031059	0.0396729	6.32237	11.4414	2.51125	chr2L	13599251	13780452	181202	+	19	19	112	20	0.1218	0.1377	0.6022	0.3077	-0.3252
fz	5_Junction_37661_Junction_37667_Junction_37669_Junction_37670_Junction_37681	5_Junction_37661_Junction_37667_Junction_37669_Junction_37670_Junction_37681	J001	0.115108	0.501676	0.478765	0.833444	7.83945	6.92845	-0.478871	chr3L	14284264	14284324	61	+	35	25	16	22	0.2349	0.2525	0.1088	0.2821	0.04825
fz	5_Junction_37661_Junction_37667_Junction_37669_Junction_37670_Junction_37681	5_Junction_37661_Junction_37667_Junction_37669_Junction_37670_Junction_37681	J002	0.0226238	5.38769	0.0202793	0.144085	6.24981	7.95264	0.916281	chr3L	14284264	14295135	10872	+	20	13	31	23	0.1342	0.1313	0.2109	0.2949	-0.12015
fz	5_Junction_37661_Junction_37667_Junction_37669_Junction_37670_Junction_37681	5_Junction_37661_Junction_37667_Junction_37669_Junction_37670_Junction_37681	J003	0.0219898	2.00401	0.156884	0.490106	6.09466	4.99956	-0.685286	chr3L	14284264	14298238	13975	+	19	12	9	8	0.1275	0.1212	0.0612	0.1026	0.04245
fz	5_Junction_37661_Junction_37667_Junction_37669_Junction_37670_Junction_37681	5_Junction_37661_Junction_37667_Junction_37669_Junction_37670_Junction_37681	J004	0.0208125	1.51504	0.218371	0.581897	6.99971	6.17069	-0.464432	chr3L	14284264	14301972	17709	+	24	20	16	12	0.1611	0.202	0.1088	0.1538	0.05025
fz	5_Junction_37661_Junction_37667_Junction_37669_Junction_37670_Junction_37681	5_Junction_37661_Junction_37667_Junction_37669_Junction_37670_Junction_37681	J005	0.229752	0.00140746	0.970073	1	8.64869	9.77935	0.537608	chr3L	14284264	14355515	71252	+	51	29	75	13	0.3423	0.2929	0.5102	0.1667	-0.02085
ome	5_Junction_37810_Junction_37811	5_Junction_37810_Junction_37811	J001	0.0262401	4.06468	0.043789	0.236629	10.7087	9.75793	-0.435645	chr3L	14721684	14793505	71822	+	129	95	33	36	0.5837	0.5163	0.4648	0.3529	0.14115
ome	5_Junction_37810_Junction_37811	5_Junction_37810_Junction_37811	J002	0.0262466	4.06402	0.0438061	0.236676	10.058	10.985	0.421122	chr3L	14721684	14801064	79381	+	92	89	38	66	0.4163	0.4837	0.5352	0.6471	-0.14115
NONE	5_Junction_38060_Junction_38061	5_Junction_38060_Junction_38061	J001	0.0971923	18.7639	1.47938e-05	0.000590682	10.7552	7.67527	-1.47139	chr3L	15028615	15031242	2628	+	75	29	43	30	0.9615	0.9667	0.5059	0.7143	0.354
NONE	5_Junction_38060_Junction_38061	5_Junction_38060_Junction_38061	J002	0.0993701	18.5192	1.68202e-05	0.000655115	2.97568	6.98101	2.83514	chr3L	15028615	15032717	4103	+	3	1	42	12	0.0385	0.0333	0.4941	0.2857	-0.354
Mbs	5_Junction_38736_Junction_38738	5_Junction_38736_Junction_38738	J001	0.0360137	15.6862	7.47689e-05	0.00230202	6.57316	3.52454	-2.08787	chr3L	16057417	16058146	730	+	22	15	2	6	0.22	0.1765	0.0183	0.0625	0.15785
Mbs	5_Junction_38736_Junction_38738	5_Junction_38736_Junction_38738	J002	0.0326159	16.2818	5.45864e-05	0.00175966	10.6323	11.9697	0.595673	chr3L	16057417	16059121	1705	+	78	70	107	90	0.78	0.8235	0.9817	0.9375	-0.15785
CG17698	5_Junction_44691_Junction_44692	5_Junction_44691_Junction_44692	J001	0.0177134	13.325	0.00026189	0.00622942	10.5079	9.3722	-0.52545	chr3L	23731284	23733259	1976	+	70	56	45	57	0.9091	0.8615	0.6818	0.6786	0.2051
CG17698	5_Junction_44691_Junction_44692	5_Junction_44691_Junction_44692	J002	0.0185397	13.1434	0.000288529	0.0067391	4.90762	7.18378	1.35509	chr3L	23731284	23739288	8005	+	7	9	21	27	0.0909	0.1385	0.3182	0.3214	-0.2051
Gug	5_Junction_50551_Junction_50552	5_Junction_50551_Junction_50552	J001	0.0195871	9.59056	0.00195581	0.028301	6.69595	4.60359	-1.30198	chr3L	8463583	8463853	271	+	32	24	2	8	0.2991	0.2927	0.0625	0.1356	0.19685
Gug	5_Junction_50551_Junction_50552	5_Junction_50551_Junction_50552	J002	0.0186182	9.71319	0.0018295	0.0269253	9.14244	10.1481	0.4701	chr3L	8463583	8464250	668	+	75	58	30	51	0.7009	0.7073	0.9375	0.8644	-0.19685
NONE	5_Junction_5237_Junction_5238	5_Junction_5237_Junction_5238	J001	0.199835	10.4333	0.00123766	0.0201255	7.46894	10.7994	1.59826	chr2L	1648924	1650012	1089	+	50	30	36	58	0.6173	0.3371	0.8571	0.9508	-0.42675
NONE	5_Junction_5237_Junction_5238	5_Junction_5237_Junction_5238	J002	0.200968	10.3865	0.00126941	0.020542	7.90542	4.61928	-1.93082	chr2L	1648924	1650015	1092	+	31	59	6	3	0.3827	0.6629	0.1429	0.0492	0.42675
CG42389	5_Junction_5278_Junction_5279	5_Junction_5278_Junction_5279	J001	0.0768895	22.8075	1.79062e-06	0.000101374	3.87963	7.26712	2.16343	chr2L	16559944	16597209	37266	+	7	4	13	31	0.175	0.1333	0.619	0.8378	-0.57425
CG42389	5_Junction_5278_Junction_5279	5_Junction_5278_Junction_5279	J002	0.0756086	23.0097	1.6119e-06	9.23587e-05	7.77233	4.64483	-1.84483	chr2L	16559944	16652741	92798	+	33	26	8	6	0.825	0.8667	0.381	0.1622	0.57425
Tm1	5_Junction_54250_Junction_54253	5_Junction_54250_Junction_54253	J001	0.109786	4.78391	0.0287268	0.17979	8.58146	10.3005	0.810632	chr3R	11128944	11129361	418	+	21	22	78	141	0.1296	0.1236	0.212	0.4196	-0.1892
Tm1	5_Junction_54250_Junction_54253	5_Junction_54250_Junction_54253	J002	0.109435	4.79754	0.0285005	0.178688	14.8452	13.1821	-0.709345	chr3R	11128944	11133751	4808	+	141	156	290	195	0.8704	0.8764	0.788	0.5804	0.1892
PP2A-B'	5_Junction_56622_Junction_56623	5_Junction_56622_Junction_56623	J001	0.166143	5.52251	0.0187733	0.137276	9.21576	6.87674	-1.18282	chr3R	14002770	14003623	854	+	40	31	16	36	0.4938	0.3647	0.0808	0.2368	0.27045
PP2A-B'	5_Junction_56622_Junction_56623	5_Junction_56622_Junction_56623	J002	0.164919	5.55817	0.0183947	0.135366	10.1703	12.5099	1.04222	chr3R	14002770	14004326	1557	+	41	54	182	116	0.5062	0.6353	0.9192	0.7632	-0.27045
VAChT	5_Junction_57723_Junction_57724	5_Junction_57723_Junction_57724	J001	0.0135203	11.1003	0.00086314	0.0152976	11.7139	10.5611	-0.515363	chr3R	14531828	14538145	6318	+	155	129	32	66	0.7452	0.6935	0.5424	0.5197	0.1883
VAChT	5_Junction_57723_Junction_57724	5_Junction_57723_Junction_57724	J002	0.0136458	11.0532	0.000885352	0.0156344	8.75116	10.2139	0.68835	chr3R	14531828	14549708	17881	+	53	57	27	61	0.2548	0.3065	0.4576	0.4803	-0.1883
CG42322	5_Junction_59303_Junction_59304	5_Junction_59303_Junction_59304	J001	0.120963	10.4625	0.00121825	0.0198724	11.2316	13.9219	1.1704	chr3R	16576076	16576408	333	+	189	88	113	123	0.1851	0.1241	0.6141	0.3727	-0.3388
CG42322	5_Junction_59303_Junction_59304	5_Junction_59303_Junction_59304	J002	0.120763	10.4788	0.00120751	0.0197368	16.8709	14.1963	-1.12633	chr3R	16576076	16578066	1991	+	832	621	71	207	0.8149	0.8759	0.3859	0.6273	0.3388
EF-G2	5_Junction_61122_Junction_61123	5_Junction_61122_Junction_61123	J001	0.0229446	5.8102	0.0159335	0.122974	6.85935	7.77104	0.481597	chr3R	18441462	18441522	61	+	22	28	18	25	0.6471	0.6512	0.8571	0.8621	-0.21045
EF-G2	5_Junction_61122_Junction_61123	5_Junction_61122_Junction_61123	J002	0.0247751	5.71834	0.0167886	0.127276	5.34467	3.64806	-1.2467	chr3R	18441462	18441527	66	+	12	15	3	4	0.3529	0.3488	0.1429	0.1379	0.21045
klg	5_Junction_61653_Junction_61654	5_Junction_61653_Junction_61654	J001	0.0317811	27.3876	1.66498e-07	1.27137e-05	4.41359	7.87435	2.06411	chr3R	18741358	18762214	20857	+	6	5	41	27	0.0732	0.0581	0.3228	0.4286	-0.31005
klg	5_Junction_61653_Junction_61654	5_Junction_61653_Junction_61654	J002	0.0308896	27.7167	1.40445e-07	1.11294e-05	11.6743	9.71718	-0.885686	chr3R	18741358	18774397	33040	+	76	81	86	36	0.9268	0.9419	0.6772	0.5714	0.31005
CG31140	5_Junction_62679_Junction_62680	5_Junction_62679_Junction_62680	J001	0.0185706	59.5418	1.19722e-14	5.44946e-12	16.2769	13.6712	-1.10196	chr3R	19805344	19806248	905	+	378	327	152	238	0.9043	0.8862	0.6179	0.5421	0.31525
CG31140	5_Junction_62679_Junction_62680	5_Junction_62679_Junction_62680	J002	0.0186629	59.3353	1.32973e-14	5.86494e-12	9.19652	12.6695	1.56605	chr3R	19805344	19807446	2103	+	40	42	94	201	0.0957	0.1138	0.3821	0.4579	-0.31525
Hrb98DE	5_Junction_66588_Junction_66589	5_Junction_66588_Junction_66589	J001	0.0141138	26.3435	2.85783e-07	2.04274e-05	15.9145	17.5376	0.678535	chr3R	24429420	24429781	362	+	361	387	489	491	0.4262	0.449	0.6996	0.6335	-0.22895
Hrb98DE	5_Junction_66588_Junction_66589	5_Junction_66588_Junction_66589	J002	0.014118	26.3369	2.86755e-07	2.04711e-05	16.768	15.0918	-0.703834	chr3R	24429420	24431182	1763	+	486	475	210	284	0.5738	0.551	0.3004	0.3665	0.22895
faf	5_Junction_69541_Junction_69542	5_Junction_69541_Junction_69542	J001	0.0208737	4.6423	0.0311932	0.190511	8.01284	6.83953	-0.615277	chr3R	27613919	27614380	462	+	45	23	11	24	0.4639	0.371	0.2683	0.2637	0.15145
faf	5_Junction_69541_Junction_69542	5_Junction_69541_Junction_69542	J002	0.0205009	4.67928	0.0305286	0.187458	8.88164	9.75655	0.414094	chr3R	27613919	27615217	1299	+	52	39	30	67	0.5361	0.629	0.7317	0.7363	-0.15145
Rbp1	5_Junction_73262_Junction_73263	5_Junction_73262_Junction_73263	J001	0.0147376	10.9249	0.000948781	0.0164934	14.8352	13.7583	-0.457944	chr3R	6610645	6611123	479	+	353	254	82	236	0.6815	0.6195	0.4659	0.5043	0.1654
Rbp1	5_Junction_73262_Junction_73263	5_Junction_73262_Junction_73263	J002	0.0147561	10.9153	0.00095375	0.0165499	12.7134	13.8694	0.497195	chr3R	6610645	6611878	1234	+	165	156	94	232	0.3185	0.3805	0.5341	0.4957	-0.1654
NONE	5_Junction_77208_Junction_77210	5_Junction_77208_Junction_77210	J001	0.171855	4.59657	0.0320359	0.193906	11.6378	14.072	1.05416	chr4	1284582	1284640	59	+	37	66	471	189	0.4933	0.569	0.8937	0.6974	-0.2644
NONE	5_Junction_77208_Junction_77210	5_Junction_77208_Junction_77210	J002	0.172464	4.58159	0.0323173	0.19499	11.0946	8.67697	-1.12298	chr4	1284582	1288727	4146	+	38	50	56	82	0.5067	0.431	0.1063	0.3026	0.2644
CkIIbeta	5_Junction_82203_Junction_82208	5_Junction_82203_Junction_82208	J001	0.0233638	8.03312	0.00459297	0.0526019	11.8046	10.4822	-0.591151	chrX	11689219	11689632	414	+	128	128	40	68	0.3855	0.4116	0.199	0.2857	0.1562
CkIIbeta	5_Junction_82203_Junction_82208	5_Junction_82203_Junction_82208	J002	0.0232711	8.0554	0.00453681	0.0521477	13.1646	14.2843	0.479034	chrX	11689219	11694024	4806	+	204	183	161	170	0.6145	0.5884	0.801	0.7143	-0.1562
CG32645	5_Junction_83459_Junction_83464_Junction_83465	5_Junction_83459_Junction_83464_Junction_83465	J001	0.0782615	4.33547	0.0373262	0.21399	6.94271	4.48479	-1.52303	chrX	12784261	12784668	408	+	36	22	4	6	0.2791	0.1774	0.0548	0.1364	0.13265
CG32645	5_Junction_83459_Junction_83464_Junction_83465	5_Junction_83459_Junction_83464_Junction_83465	J002	0.0127598	4.7329	0.0295909	0.183331	8.34943	9.14883	0.387913	chrX	12784261	13037864	253604	+	48	47	36	25	0.3721	0.379	0.4932	0.5682	-0.15515
CG32645	5_Junction_83459_Junction_83464_Junction_83465	5_Junction_83459_Junction_83464_Junction_83465	J003	0.0479036	0.0228271	0.879907	1	8.52159	8.43514	-0.0424995	chrX	12784261	13041242	256982	+	45	55	33	13	0.3488	0.4435	0.4521	0.2955	0.02235
rdgB	5_Junction_84641_Junction_84642	5_Junction_84641_Junction_84642	J001	0.0201963	20.834	5.00861e-06	0.000239475	9.571	11.6977	0.964291	chrX	13668011	13669464	1454	+	55	53	86	95	0.0873	0.1265	0.273	0.2493	-0.15425
rdgB	5_Junction_84641_Junction_84642	5_Junction_84641_Junction_84642	J002	0.0200501	20.9419	4.73421e-06	0.000230224	16.7132	15.1906	-0.639213	chrX	13668011	13670004	1994	+	575	366	229	286	0.9127	0.8735	0.727	0.7507	0.15425
dpr8	5_Junction_86136_Junction_86138_Junction_86139	5_Junction_86136_Junction_86138_Junction_86139	J001	0.123013	11.2756	0.000785318	0.0142846	9.00138	15.5245	2.87675	chrX	14299309	14309694	10386	+	41	38	516	23	0.2092	0.181	0.7147	0.4423	-0.3834
dpr8	5_Junction_86136_Junction_86138_Junction_86139	5_Junction_86136_Junction_86138_Junction_86139	J002	0.348593	0.0480184	0.826548	1	6.73653	6.13264	-0.342851	chrX	14299309	14541847	242539	+	15	20	19	10	0.0765	0.0952	0.0263	0.1923	-0.02345
dpr8	5_Junction_86136_Junction_86138_Junction_86139	5_Junction_86136_Junction_86138_Junction_86139	J003	0.0162818	59.6388	1.13968e-14	5.25343e-12	13.2073	12.0437	-0.505203	chrX	14299309	14788295	488987	+	140	152	187	19	0.7143	0.7238	0.259	0.3654	0.40685
l(1)G0136	5_Junction_88266_Junction_88267	5_Junction_88266_Junction_88267	J001	0.0894348	5.48983	0.0191274	0.138972	7.57548	5.81202	-0.98182	chrX	15629207	15629275	69	+	17	16	10	32	0.1771	0.1441	0.0331	0.0833	0.1024
l(1)G0136	5_Junction_88266_Junction_88267	5_Junction_88266_Junction_88267	J002	0.0875459	5.57064	0.018264	0.134922	12.7695	14.2419	0.631634	chrX	15629207	15629278	72	+	79	95	292	352	0.8229	0.8559	0.9669	0.9167	-0.1024
CG4829	5_Junction_90286_Junction_90287	5_Junction_90286_Junction_90287	J001	0.41925	5.7857	0.016157	0.124057	10.1842	5.92364	-2.1779	chrX	16717239	16717618	380	+	31	24	25	36	0.9118	0.8276	0.1488	0.6102	0.4902
CG4829	5_Junction_90286_Junction_90287	5_Junction_90286_Junction_90287	J002	0.417863	5.80278	0.0160009	0.123394	5.0118	9.10281	2.24818	chrX	16717239	16717888	650	+	3	5	143	23	0.0882	0.1724	0.8512	0.3898	-0.4902
kek5	5_Junction_93143_Junction_93148_Junction_93150_Junction_93153_Junction_93163_Junction_93166_Junction_93167_Junction_93172_Junction_93176_Junction_93179_Junction_93180_Junction_93182_Junction_93183_Junction_93185_Junction_93186_Junction_93187_Junction_93189_Junction_93190_Junction_93191_Junction_93193_Junction_93196_Junction_93198_Junction_93204_Junction_93205_Junction_93212_Junction_93221_Junctio…	5_Junction_93143_Junction_93148_Junction_93150_Junction_93153_Junction_93163_Junction_93166_Junction_93167_Junction_93172_Junction_93176_Junction_93179_Junction_93180_Junction_93182_Junction_93183_Junction_93185_Junction_93186_Junction_93187_Junction_93189_Junction_93190_Junction_93191_Junction_93193_Junction_93196_Junction_93198_Junction_93204_Junction_93205_Junction_93212_Junction_93221_Junctio…	J001	0.00753893	1.09783	0.294744	0.672065	9.06802	10.4823	0.658312	chrX	19287450	19287485	36	+	50	47	92	22	0.0096	0.0101	0.0124	0.011	-0.00185
sgg	5_Junction_96211_Junction_96212	5_Junction_96211_Junction_96212	J001	0.0862828	8.44938	0.00365168	0.0446625	5.8197	8.08612	1.2376	chrX	2567651	2568628	978	+	11	11	37	33	0.0493	0.0598	0.2701	0.1341	-0.14755
sgg	5_Junction_96211_Junction_96212	5_Junction_96211_Junction_96212	J002	0.0851027	8.53708	0.00347983	0.043214	14.4819	12.5688	-0.820653	chrX	2567651	2571132	3482	+	212	173	100	213	0.9507	0.9402	0.7299	0.8659	0.14755
AstA-R1	5_Junction_99377_Junction_99378	5_Junction_99377_Junction_99378	J001	0.198561	7.02793	0.00802481	0.0773222	6.14212	9.68736	1.81909	chrX	3521774	3533249	11476	+	10	10	118	14	0.1031	0.0667	0.5364	0.2188	-0.2927
AstA-R1	5_Junction_99377_Junction_99378	5_Junction_99377_Junction_99378	J002	0.197872	7.05037	0.00792489	0.0766507	13.5443	9.90445	-1.61118	chrX	3521774	3537524	15751	+	87	140	102	50	0.8969	0.9333	0.4636	0.7812	0.2927
Mnt	5_Junction_99436_Junction_99437_Junction_99440	5_Junction_99436_Junction_99437_Junction_99440	J001	0.0420312	6.88193	0.00870714	0.0817913	9.1578	7.06789	-1.05171	chrX	3587965	3592149	4185	+	56	63	15	16	0.3916	0.5207	0.2727	0.2078	0.2159
Mnt	5_Junction_99436_Junction_99437_Junction_99440	5_Junction_99436_Junction_99437_Junction_99440	J002	0.0422059	12.8637	0.000335024	0.00754924	4.76003	7.58131	1.66553	chrX	3587965	3592371	4407	+	12	10	20	17	0.0839	0.0826	0.3636	0.2208	-0.20895
Mnt	5_Junction_99436_Junction_99437_Junction_99440	5_Junction_99436_Junction_99437_Junction_99440	J003	0.0859486	0.00809519	0.928308	1	9.20814	9.02967	-0.0851387	chrX	3587965	3592776	4812	+	75	48	20	44	0.5245	0.3967	0.3636	0.5714	-0.0069

## Sheet: AS inron retention events
Gene	AS_event_ID	AS_structure_ID	sub_junction_ID	sub-junction_dispersion_estimate	LRT_statistic-full_vs_reduced	LRT_p_value-full_vs_reduced	BH_adjusted_p-values	DN1	LNd	fitting_parameter_log2fold_change_LNd_DN1	sub_junction_chr	sub_junction_start_coor	sub_junction_end_coor	sub_junction_size	sub_junction_strand	raw_count.DN1_A	raw_count.DN1_B	raw_count.LNd_A	raw_count.LNd_B	percentage_usage.DN1_A	percentage_usage.DN1_B	percentage_usage.LNd_A	percentage_usage.LNd_B	deltaPSI
l(1)G0334	intronretention_Junction_100955	intronretentionleft-Junction_100955	J001	0.0501846	9.47901	0.00207836	0.0295705	17.3126	18.9557	0.682996	chrX	4598550	4598619	70	+	369	425	842	1312	0.5371	0.6334	0.8337	0.7532
l(1)G0334	intronretention_Junction_100955	intronretentionleft-Junction_100955	J002	0.0502249	9.47182	0.00208652	0.0296422	16.0834	14.399	-0.710574	chrX	4598477	4598598	122	+	318	246	168	430	0.4629	0.3666	0.1663	0.2468
l(1)G0334	intronretention_Junction_100955	intronretentionright-Junction_100955	J001	0.0383459	11.1397	0.000845011	0.0150669	17.3485	18.9193	0.652913	chrX	4598550	4598619	70	+	369	425	842	1312	0.4725	0.547	0.7732	0.6848
l(1)G0334	intronretention_Junction_100955	intronretentionright-Junction_100955	J002	0.0383636	11.1348	0.000847218	0.0150921	17.1787	15.5787	-0.670069	chrX	4598572	4598691	120	+	412	352	247	604	0.5275	0.453	0.2268	0.3152	0.238947
Ca-alpha1T	intronretention_Junction_102730	intronretentionleft-Junction_102730	J001	0.0811905	5.09978	0.0239288	0.160005	9.05443	10.7298	0.776935	chrX	6017631	6017725	95	-	55	38	113	0	0.7857	0.6552	0.9187	INF
Ca-alpha1T	intronretention_Junction_102730	intronretentionleft-Junction_102730	J002	0.0860388	4.89131	0.0269921	0.172201	6.37416	4.10663	-1.49183	chrX	6017583	6017679	97	-	15	20	10	0	0.2143	0.3448	0.0813	INF
Ca-alpha1T	intronretention_Junction_102730	intronretentionright-Junction_102730	J001	0.0195666	18.1323	2.06071e-05	0.000781133	8.74907	10.8761	0.989919	chrX	6017631	6017725	95	-	55	38	113	0	0.3438	0.38	0.689	INF
Ca-alpha1T	intronretention_Junction_102730	intronretentionright-Junction_102730	J002	0.0195866	18.1214	2.07264e-05	0.000785131	10.5393	8.30187	-1.05711	chrX	6017678	6017792	115	-	105	62	51	0	0.6562	0.62	0.311	INF	0.333949
CG33123	intronretention_Junction_10315	intronretentionleft-Junction_10315	J001	0.0266181	9.98498	0.00157822	0.0240965	8.22806	9.70166	0.708659	chr2L	3511026	3511086	61	-	45	27	39	56	0.4206	0.4909	0.7647	0.6588
CG33123	intronretention_Junction_10315	intronretentionleft-Junction_10315	J002	0.0268304	9.94723	0.00161092	0.0244483	8.86724	7.2028	-0.840293	chr2L	3510958	3511074	117	-	62	28	12	29	0.5794	0.5091	0.2353	0.3412
CG33123	intronretention_Junction_10315	intronretentionright-Junction_10315	J001	0.0166702	4.16834	0.0411862	0.227818	8.58406	9.33167	0.359282	chr2L	3511026	3511086	61	-	45	27	39	56	0.6338	0.5745	0.7647	0.7467
CG33123	intronretention_Junction_10315	intronretentionright-Junction_10315	J002	0.0171584	4.13372	0.0420368	0.230443	7.31953	6.19909	-0.618679	chr2L	3511039	3511145	107	-	26	20	12	19	0.3662	0.4255	0.2353	0.2533	0.229582
Pink1	intronretention_Junction_103411	intronretentionleft-Junction_103411	J001	0.0253461	4.69245	0.0302955	0.18653	10.8879	9.87268	-0.463112	chrX	6578103	6578159	57	+	116	63	38	59	0.6304	0.525	0.4524	0.4069
Pink1	intronretention_Junction_103411	intronretentionleft-Junction_103411	J002	0.0253623	4.69044	0.0303309	0.186687	9.78866	10.8118	0.467836	chrX	6578034	6578151	118	+	68	57	46	86	0.3696	0.475	0.5476	0.5931
Pink1	intronretention_Junction_103411	intronretentionright-Junction_103411	J001	0.020235	4.34306	0.0371601	0.213436	10.8433	9.91963	-0.421299	chrX	6578103	6578159	57	+	116	63	38	59	0.58	0.4846	0.3838	0.4126
Pink1	intronretention_Junction_103411	intronretentionright-Junction_103411	J002	0.0202136	4.34584	0.0370995	0.21326	10.3308	11.2169	0.399729	chrX	6578112	6578229	118	+	84	67	61	84	0.42	0.5154	0.6162	0.5874	-0.125012
tutl	intronretention_Junction_10749	intronretentionleft-Junction_10749	J001	0.157502	9.53193	0.00201928	0.0289616	12.4527	9.45126	-1.35136	chr2L	4308426	4308774	349	+	123	99	29	86	0.5721	0.6111	0.1047	0.2966
tutl	intronretention_Junction_10749	intronretentionleft-Junction_10749	J002	0.157219	9.54782	0.00200187	0.0288193	11.2571	14.2637	1.30469	chr2L	4308361	4308474	114	+	92	63	248	204	0.4279	0.3889	0.8953	0.7034
tutl	intronretention_Junction_10749	intronretentionright-Junction_10749	J001	0.0888996	9.53777	0.00201286	0.0288982	12.0689	9.82328	-1.0099	chr2L	4308426	4308774	349	+	123	99	29	86	0.5256	0.547	0.1472	0.3071
tutl	intronretention_Junction_10749	intronretentionright-Junction_10749	J002	0.0887263	9.554	0.00199515	0.0287836	11.6008	13.7993	0.954117	chr2L	4308727	4308838	112	+	111	82	168	194	0.4744	0.453	0.8528	0.6929	-0.270092
CG17162	intronretention_Junction_108362	intronretentionleft-Junction_108362	J001	0.251199	7.32972	0.00678235	0.0688853	4.36506	7.05464	1.67167	chrXHet	66048	66120	73	-	8	3	24	27	0.1111	0.0395	0.6	0.2647
CG17162	intronretention_Junction_108362	intronretentionleft-Junction_108362	J002	0.248053	7.40339	0.0065101	0.0668481	11.2181	8.38011	-1.32368	chrXHet	66000	66096	97	-	64	73	16	75	0.8889	0.9605	0.4	0.7353
CG17162	intronretention_Junction_108362	intronretentionright-Junction_108362	J001	0.0575488	18.5716	1.63641e-05	0.000639908	4.21179	7.28074	1.90796	chrXHet	66048	66120	73	-	8	3	24	27	0.1231	0.0652	0.5581	0.3971
CG17162	intronretention_Junction_108362	intronretentionright-Junction_108362	J002	0.0558802	18.8432	1.41916e-05	0.000570645	9.88714	7.62927	-1.09845	chrXHet	66073	66167	95	-	57	43	19	41	0.8769	0.9348	0.4419	0.6029	0.254183
CG15440	intronretention_Junction_10865	intronretentionleft-Junction_10865	J001	0.0401278	14.8837	0.000114349	0.00322404	6.82994	4.16784	-1.69908	chr2L	4454265	4454325	61	-	30	48	0	6	0.6818	0.7619	INF	0.2143
CG15440	intronretention_Junction_10865	intronretentionleft-Junction_10865	J002	0.0419172	14.6261	0.000131089	0.00356593	4.50985	7.06824	1.57262	chr2L	4454200	4454313	114	-	14	15	0	22	0.3182	0.2381	INF	0.7857
CG15440	intronretention_Junction_10865	intronretentionright-Junction_10865	J001	0.300239	4.06226	0.0438518	0.236834	6.75921	4.12507	-1.69336	chr2L	4454265	4454325	61	-	30	48	0	6	0.4225	0.7385	INF	0.1277
CG15440	intronretention_Junction_10865	intronretentionright-Junction_10865	J002	0.299653	4.06938	0.0436673	0.236218	5.90255	8.66021	1.47159	chr2L	4454278	4454399	122	-	41	17	0	41	0.5775	0.2615	INF	0.8723	-0.389514
CG31650	intronretention_Junction_11464	intronretentionleft-Junction_11464	J001	0.00478807	7.78673	0.00526313	0.0578266	15.3503	14.7214	-0.265677	chr2L	5041539	5041687	149	-	255	197	270	358	0.573	0.5427	0.4592	0.4729
CG31650	intronretention_Junction_11464	intronretentionleft-Junction_11464	J002	0.00478796	7.78683	0.00526284	0.0578266	14.5436	15.186	0.271742	chr2L	5041469	5041587	119	-	190	166	318	399	0.427	0.4573	0.5408	0.5271
CG31650	intronretention_Junction_11464	intronretentionright-Junction_11464	J001	0.0120945	15.034	0.000105589	0.00302351	15.5593	14.517	-0.440322	chr2L	5041539	5041687	149	-	255	197	270	358	0.8388	0.8528	0.7337	0.6858
CG31650	intronretention_Junction_11464	intronretentionright-Junction_11464	J002	0.0121734	14.9775	0.000108798	0.00309148	9.95088	11.549	0.721828	chr2L	5041640	5041758	119	-	49	34	98	164	0.1612	0.1472	0.2663	0.3142	-0.115061
CG31650	intronretention_Junction_11470	intronretentionleft-Junction_11470	J001	0.00739867	38.9363	4.37854e-10	7.01762e-08	15.9638	14.3223	-0.693009	chr2L	5042890	5042959	70	-	184	199	482	252	0.6073	0.6611	0.403	0.3883
CG31650	intronretention_Junction_11470	intronretentionleft-Junction_11470	J002	0.00739434	38.9504	4.34718e-10	6.98842e-08	14.0692	15.7462	0.709281	chr2L	5042822	5042938	117	-	119	102	714	397	0.3927	0.3389	0.597	0.6117
CG31650	intronretention_Junction_11470	intronretentionright-Junction_11470	J001	0.00484817	50.6984	1.07706e-12	3.03373e-10	15.9596	14.295	-0.702817	chr2L	5042890	5042959	70	-	184	199	482	252	0.6389	0.6746	0.413	0.4158
CG31650	intronretention_Junction_11470	intronretentionright-Junction_11470	J002	0.00484607	50.7096	1.07096e-12	3.03157e-10	13.7339	15.5067	0.751712	chr2L	5042912	5043031	120	-	104	96	685	354	0.3611	0.3254	0.587	0.5842	-0.222927
CG3476	intronretention_Junction_12986	intronretentionleft-Junction_12986	J001	0.0942615	7.49412	0.00619007	0.0644577	10.6052	8.65894	-0.911446	chr2L	7028666	7028725	60	+	90	78	27	35	0.7563	0.8764	0.45	0.6034
CG3476	intronretention_Junction_12986	intronretentionleft-Junction_12986	J002	0.0953992	7.42889	0.00641848	0.0661107	6.3902	8.48371	1.1005	chr2L	7028593	7028714	122	+	29	11	33	23	0.2437	0.1236	0.55	0.3966
CG3476	intronretention_Junction_12986	intronretentionright-Junction_12986	J001	0.0156513	12.338	0.000443841	0.00918633	10.19	9.0363	-0.539997	chr2L	7028666	7028725	60	+	90	78	27	35	0.8491	0.8387	0.6	0.6481
CG3476	intronretention_Junction_12986	intronretentionright-Junction_12986	J002	0.0162908	12.1991	0.000478119	0.00973642	5.50396	7.54857	1.15761	chr2L	7028678	7028792	115	+	16	15	18	19	0.1509	0.1613	0.4	0.3519	-0.307984
CG11266	intronretention_Junction_12995	intronretentionleft-Junction_12995	J001	0.0126106	33.6398	6.63206e-09	7.82872e-07	11.9333	9.64794	-1.03206	chr2L	7032839	7032902	64	+	89	75	70	61	0.4785	0.5515	0.2389	0.2186
CG11266	intronretention_Junction_12995	intronretentionleft-Junction_12995	J002	0.0125297	33.7552	6.25031e-09	7.47109e-07	11.7935	13.6124	0.789087	chr2L	7032771	7032887	117	+	97	61	223	218	0.5215	0.4485	0.7611	0.7814
CG11266	intronretention_Junction_12995	intronretentionright-Junction_12995	J001	0.00816876	23.9733	9.76827e-07	6.01583e-05	11.7288	9.82572	-0.859242	chr2L	7032839	7032902	64	+	89	75	70	61	0.289	0.3304	0.1542	0.151
CG11266	intronretention_Junction_12995	intronretentionright-Junction_12995	J002	0.00809238	24.0804	9.23973e-07	5.7769e-05	14.4418	15.5483	0.467589	chr2L	7032855	7032974	120	+	219	152	384	343	0.711	0.6696	0.8458	0.849	-0.139351
CG4495	intronretention_Junction_13086	intronretentionleft-Junction_13086	J001	0.0582121	5.02585	0.0249717	0.164256	14.5211	13.1284	-0.595149	chr2L	7183986	7184041	56	+	199	198	138	213	0.7804	0.7557	0.5055	0.6719
CG4495	intronretention_Junction_13086	intronretentionleft-Junction_13086	J002	0.0583289	5.01709	0.0250983	0.164879	10.5731	12.0426	0.65446	chr2L	7183919	7184034	116	+	56	64	135	104	0.2196	0.2443	0.4945	0.3281
CG4495	intronretention_Junction_13086	intronretentionright-Junction_13086	J001	0.0133172	25.6461	4.10122e-07	2.80129e-05	14.5695	13.0808	-0.636246	chr2L	7183986	7184041	56	+	199	198	138	213	0.8223	0.8426	0.5872	0.6474
CG4495	intronretention_Junction_13086	intronretentionright-Junction_13086	J002	0.013405	25.5528	4.30434e-07	2.92947e-05	9.33022	11.4793	0.980994	chr2L	7183994	7184102	109	+	43	37	97	116	0.1777	0.1574	0.4128	0.3526	-0.232551
ico	intronretention_Junction_13121	intronretentionleft-Junction_13121	J001	0.0196409	17.9892	2.22159e-05	0.000831362	14.5513	13.1221	-0.610718	chr2L	7220677	7220740	64	-	226	251	100	198	0.8828	0.8901	0.7634	0.6828
ico	intronretention_Junction_13121	intronretentionleft-Junction_13121	J002	0.0200074	17.783	2.47588e-05	0.000912372	7.96648	10.1985	1.06962	chr2L	7220612	7220725	114	-	30	31	31	92	0.1172	0.1099	0.2366	0.3172
ico	intronretention_Junction_13121	intronretentionright-Junction_13121	J001	0.00826174	18.0626	2.13763e-05	0.000804396	14.3849	13.2993	-0.463813	chr2L	7220677	7220740	64	-	226	251	100	198	0.7584	0.7819	0.625	0.5893
ico	intronretention_Junction_13121	intronretentionright-Junction_13121	J002	0.00831562	18.0026	2.20601e-05	0.000827393	10.3723	11.9319	0.697162	chr2L	7220693	7220811	119	-	72	70	60	138	0.2416	0.2181	0.375	0.4107	-0.207958
CG8498	intronretention_Junction_13922	intronretentionleft-Junction_13922	J001	0.0208314	6.48184	0.0108982	0.0955495	14.9856	15.9792	0.418335	chr2L	8162063	8162121	59	-	241	203	393	418	0.3838	0.4274	0.5857	0.5024
CG8498	intronretention_Junction_13922	intronretentionleft-Junction_13922	J002	0.0208302	6.48216	0.0108963	0.0955495	16.3198	15.3373	-0.412736	chr2L	8161993	8162111	119	-	387	272	278	414	0.6162	0.5726	0.4143	0.4976
CG8498	intronretention_Junction_13922	intronretentionright-Junction_13922	J001	0.0125228	4.09688	0.0429625	0.233833	15.1748	15.7831	0.256114	chr2L	8162063	8162121	59	-	241	203	393	418	0.6025	0.6744	0.7211	0.7194
CG8498	intronretention_Junction_13922	intronretentionright-Junction_13922	J002	0.0125589	4.08822	0.0431831	0.234557	13.2976	12.5628	-0.317558	chr2L	8162074	8162195	122	-	159	98	152	163	0.3975	0.3256	0.2789	0.2806	0.11856
CG8372	intronretention_Junction_14027	intronretentionleft-Junction_14027	J001	0.0126891	7.1438	0.00752236	0.0740177	12.2737	11.3396	-0.41145	chr2L	8212692	8212765	74	-	174	139	32	105	0.5043	0.4618	0.3077	0.3723
CG8372	intronretention_Junction_14027	intronretentionleft-Junction_14027	J002	0.0126633	7.15164	0.00748955	0.0738149	12.493	13.3246	0.359483	chr2L	8212625	8212740	116	-	171	162	72	177	0.4957	0.5382	0.6923	0.6277
CG8372	intronretention_Junction_14027	intronretentionright-Junction_14027	J001	0.0612229	18.6906	1.53738e-05	0.000610838	13.0259	10.5335	-1.09997	chr2L	8212692	8212765	74	-	174	139	32	105	0.8571	0.8528	0.4	0.5932
CG8372	intronretention_Junction_14027	intronretentionright-Junction_14027	J002	0.061615	18.6009	1.61147e-05	0.00063364	7.5039	10.2814	1.34492	chr2L	8212718	8212819	102	-	29	24	48	72	0.1429	0.1472	0.6	0.4068	-0.192898
CG33129	intronretention_Junction_1421	intronretentionleft-Junction_1421	J001	0.017642	12.5078	0.000405262	0.00863604	17.3704	16.0999	-0.531066	chr2L	10965719	10965790	72	-	522	465	330	439	0.5294	0.5172	0.3137	0.3913
CG33129	intronretention_Junction_1421	intronretentionleft-Junction_1421	J002	0.0176369	12.511	0.000404556	0.00862421	17.0492	18.2891	0.516238	chr2L	10965649	10965767	119	-	464	434	722	683	0.4706	0.4828	0.6863	0.6087
CG33129	intronretention_Junction_1421	intronretentionright-Junction_1421	J001	0.0060475	17.3348	3.13398e-05	0.00110892	17.0821	16.3808	-0.293126	chr2L	10965719	10965790	72	-	522	465	330	439	0.8985	0.8994	0.8209	0.8085
CG33129	intronretention_Junction_1421	intronretentionright-Junction_1421	J002	0.00611537	17.2516	3.27426e-05	0.00115068	9.79788	11.3956	0.724704	chr2L	10965743	10965861	119	-	59	52	72	104	0.1015	0.1006	0.1791	0.1915	-0.168406
Dh31	intronretention_Junction_14368	intronretentionleft-Junction_14368	J001	0.0587555	4.09207	0.0430848	0.234203	12.1243	13.5514	0.617715	chr2L	8506706	8506791	86	-	250	436	0	125	0.2572	0.3577	INF	0.5187
Dh31	intronretention_Junction_14368	intronretentionleft-Junction_14368	J002	0.0586613	4.09797	0.0429348	0.233744	14.7074	13.3086	-0.596632	chr2L	8506633	8506754	122	-	722	783	0	116	0.7428	0.6423	INF	0.4813
Dh31	intronretention_Junction_14368	intronretentionright-Junction_14368	J001	0.0689118	6.50934	0.0107309	0.0946601	11.8602	13.8062	0.84266	chr2L	8506706	8506791	86	-	250	436	0	125	0.2864	0.4048	INF	0.6443
Dh31	intronretention_Junction_14368	intronretentionright-Junction_14368	J002	0.0688296	6.51635	0.0106887	0.0945812	13.8358	11.8928	-0.840994	chr2L	8506744	8506846	103	-	623	641	0	69	0.7136	0.5952	INF	0.3557	0.207652
Eaat1	intronretention_Junction_14867	intronretentionleft-Junction_14867	J001	0.0160451	8.43233	0.00368607	0.0449478	14.4586	13.446	-0.432065	chr2L	9340640	9340698	59	+	160	172	45	453	0.8466	0.8776	0.7895	0.7318
Eaat1	intronretention_Junction_14867	intronretentionleft-Junction_14867	J002	0.0162885	8.35212	0.00385238	0.0464934	8.52631	10.1606	0.773569	chr2L	9340570	9340688	119	+	29	24	12	166	0.1534	0.1224	0.2105	0.2682
Eaat1	intronretention_Junction_14867	intronretentionright-Junction_14867	J001	0.0130379	7.55337	0.0059898	0.0629924	14.3554	13.5639	-0.337676	chr2L	9340640	9340698	59	+	160	172	45	453	0.8	0.8113	0.6338	0.7078
Eaat1	intronretention_Junction_14867	intronretentionright-Junction_14867	J002	0.0131661	7.52029	0.00610077	0.0638432	9.68659	10.8688	0.541035	chr2L	9340651	9340770	120	+	40	40	26	187	0.2	0.1887	0.3662	0.2922	-0.16165
Nckx30C	intronretention_Junction_15143	intronretentionleft-Junction_15143	J001	0.0102537	5.47683	0.0192702	0.1396	15.3743	14.7679	-0.256094	chr2L	9718006	9718264	259	-	412	344	107	292	0.8443	0.8152	0.7698	0.7449
Nckx30C	intronretention_Junction_15143	intronretentionleft-Junction_15143	J002	0.010361	5.44415	0.019634	0.141479	10.1179	11.1182	0.453221	chr2L	9717942	9718054	113	-	76	78	32	100	0.1557	0.1848	0.2302	0.2551
Nckx30C	intronretention_Junction_15143	intronretentionright-Junction_15143	J001	0.00910974	20.6241	5.58891e-06	0.000262154	15.661	14.4884	-0.495239	chr2L	9718006	9718264	259	-	412	344	107	292	0.7067	0.7122	0.4931	0.5562
Nckx30C	intronretention_Junction_15143	intronretentionright-Junction_15143	J002	0.00913165	20.5938	5.67799e-06	0.000265238	12.6425	14.024	0.593879	chr2L	9718217	9718334	118	-	171	139	110	233	0.2933	0.2878	0.5069	0.4438	-0.170731
FKBP59	intronretention_Junction_15393	intronretentionleft-Junction_15393	J001	0.0162988	4.15327	0.0415542	0.229033	13.4321	12.7089	-0.311917	chr2L	9888787	9888845	59	+	314	220	39	136	0.7476	0.6875	0.6094	0.6126
FKBP59	intronretention_Junction_15393	intronretentionleft-Junction_15393	J002	0.0163831	4.14026	0.0418748	0.229973	10.3418	11.2416	0.40572	chr2L	9888714	9888835	122	+	106	100	25	86	0.2524	0.3125	0.3906	0.3874
FKBP59	intronretention_Junction_15393	intronretentionright-Junction_15393	J001	0.018094	83.0082	8.17144e-20	8.45328e-17	14.722	11.4482	-1.4142	chr2L	9888787	9888845	59	+	314	220	39	136	0.8464	0.8209	0.312	0.3931
FKBP59	intronretention_Junction_15393	intronretentionright-Junction_15393	J002	0.0181547	82.8267	8.95734e-20	9.10081e-17	9.42247	13.2205	1.6972	chr2L	9888798	9888915	118	+	57	48	86	210	0.1536	0.1791	0.688	0.6069	-0.340646
Gpb5	intronretention_Junction_15584	intronretentionleft-Junction_15584	J001	0.0771103	25.9281	3.54377e-07	2.45591e-05	11.4266	14.8702	1.4865	chr2LHet	167315	167374	60	+	88	45	306	390	0.2493	0.2446	0.6538	0.8108
Gpb5	intronretention_Junction_15584	intronretentionleft-Junction_15584	J002	0.0771453	25.9173	3.56361e-07	2.46366e-05	15.1417	11.7058	-1.47767	chr2LHet	167267	167363	97	+	265	139	162	91	0.7507	0.7554	0.3462	0.1892
Gpb5	intronretention_Junction_15584	intronretentionright-Junction_15584	J001	0.0318502	33.3589	7.66283e-09	8.91599e-07	11.8482	14.4391	1.11751	chr2LHet	167315	167374	60	+	88	45	306	390	0.4944	0.4128	0.8524	0.7927
Gpb5	intronretention_Junction_15584	intronretentionright-Junction_15584	J002	0.0320005	33.2435	8.13106e-09	9.44148e-07	12.3566	9.44008	-1.31476	chr2LHet	167327	167440	114	+	90	64	53	102	0.5056	0.5872	0.1476	0.2073	0.438094
CG8331	intronretention_Junction_15719	intronretentionleft-Junction_15719	J001	0.00932712	15.0154	0.000106637	0.0030443	20.519	19.5488	-0.401351	chr2R	10060188	10060250	63	+	1728	1542	621	949	0.5314	0.5804	0.4318	0.4047
CG8331	intronretention_Junction_15719	intronretentionleft-Junction_15719	J002	0.0093271	15.0154	0.000106635	0.0030443	19.7471	20.713	0.399414	chr2R	10060115	10060236	122	+	1524	1115	817	1396	0.4686	0.4196	0.5682	0.5953
CG8331	intronretention_Junction_15719	intronretentionright-Junction_15719	J001	0.00931524	14.1386	0.000169819	0.0043959	20.4919	19.5759	-0.378909	chr2R	10060188	10060250	63	+	1728	1542	621	949	0.7155	0.7551	0.6235	0.6079
CG8331	intronretention_Junction_15719	intronretentionright-Junction_15719	J002	0.00932088	14.1312	0.00017049	0.00440925	16.9468	17.9454	0.416117	chr2R	10060203	10060323	121	+	687	500	375	612	0.2845	0.2449	0.3765	0.3921	-0.131834
Trs31	intronretention_Junction_16204	intronretentionleft-Junction_16204	J001	0.023033	7.55584	0.00598159	0.0629516	15.0899	14.0536	-0.439522	chr2R	10644683	10644744	62	-	288	323	145	206	0.7721	0.8346	0.6938	0.654
Trs31	intronretention_Junction_16204	intronretentionleft-Junction_16204	J002	0.0231492	7.52786	0.00607521	0.063646	10.3731	11.6583	0.576304	chr2R	10644613	10644731	119	-	85	64	64	109	0.2279	0.1654	0.3062	0.346
Trs31	intronretention_Junction_16204	intronretentionright-Junction_16204	J001	0.0173784	6.79387	0.00914712	0.0845975	15.0287	14.1127	-0.388479	chr2R	10644683	10644744	62	-	288	323	145	206	0.6682	0.7242	0.5351	0.5954
Trs31	intronretention_Junction_16204	intronretentionright-Junction_16204	J002	0.0174134	6.78383	0.00919874	0.084923	12.2022	13.2323	0.446625	chr2R	10644697	10644818	122	-	143	123	126	140	0.3318	0.2758	0.4649	0.4046	-0.152945
Trpm	intronretention_Junction_16621	intronretentionleft-Junction_16621	J001	0.00916456	28.3416	1.01686e-07	8.41628e-06	10.7594	8.3298	-1.14283	chr2R	11153342	11153448	107	-	143	154	14	19	0.4497	0.4768	0.1842	0.2021
Trpm	intronretention_Junction_16621	intronretentionleft-Junction_16621	J002	0.00912621	28.3821	9.95822e-08	8.27143e-06	11.2248	12.8444	0.710584	chr2R	11153270	11153390	121	-	175	169	62	75	0.5503	0.5232	0.8158	0.7979
Trpm	intronretention_Junction_16621	intronretentionright-Junction_16621	J001	0.200132	6.99619	0.00816836	0.0781758	11.1935	7.96343	-1.52097	chr2R	11153342	11153448	107	-	143	154	14	19	0.6272	0.7586	0.1489	0.4318
Trpm	intronretention_Junction_16621	intronretentionright-Junction_16621	J002	0.200349	6.98923	0.00820016	0.0784338	8.65085	11.9024	1.49377	chr2R	11153401	11153510	110	-	85	49	80	25	0.3728	0.2414	0.8511	0.5682	-0.259705
Trpm	intronretention_Junction_16633	intronretentionleft-Junction_16633	J001	0.171487	3.8829	0.0487801	0.251984	12.3021	9.64515	-1.19481	chr2R	11157262	11157801	540	-	193	150	39	29	0.3876	0.3247	0.0765	0.2458
Trpm	intronretention_Junction_16633	intronretentionleft-Junction_16633	J002	0.171143	3.89051	0.0485597	0.25147	14.305	16.9877	1.1289	chr2R	11157199	11157310	112	-	305	312	471	89	0.6124	0.6753	0.9235	0.7542
Trpm	intronretention_Junction_16633	intronretentionright-Junction_16633	J001	0.122027	4.98993	0.0254953	0.166259	12.1086	9.81775	-1.02986	chr2R	11157262	11157801	540	-	193	150	39	29	0.8319	0.8065	0.4286	0.725
Trpm	intronretention_Junction_16633	intronretentionright-Junction_16633	J002	0.122895	4.95725	0.0259815	0.168117	7.45843	9.80619	1.14964	chr2R	11157754	11157850	97	-	39	36	52	11	0.1681	0.1935	0.5714	0.275	-0.183204
Trpm	intronretention_Junction_16682	intronretentionleft-Junction_16682	J001	0.162179	4.45563	0.0347863	0.204403	11.8222	9.45035	-1.07585	chr2R	11194659	11196699	2041	-	232	205	17	29	0.5421	0.5994	0.1518	0.4203
Trpm	intronretention_Junction_16682	intronretentionleft-Junction_16682	J002	0.162172	4.45581	0.0347827	0.204403	10.9128	13.2927	1.04361	chr2R	11194589	11194707	119	-	196	137	95	40	0.4579	0.4006	0.8482	0.5797
Trpm	intronretention_Junction_16682	intronretentionright-Junction_16682	J001	0.0417331	11.7664	0.000603086	0.0115379	11.5752	9.69521	-0.852098	chr2R	11194659	11196699	2041	-	232	205	17	29	0.7009	0.7678	0.3617	0.5179
Trpm	intronretention_Junction_16682	intronretentionright-Junction_16682	J002	0.0420317	11.7139	0.000620353	0.0118008	8.43548	10.4672	0.958305	chr2R	11196652	11196766	115	-	99	62	30	27	0.2991	0.2322	0.6383	0.4821	-0.262926
Csl4	intronretention_Junction_1672	intronretentionleft-Junction_1672	J001	0.0110264	6.51467	0.0106988	0.0945971	10.958	10.004	-0.433886	chr2L	11123257	11123310	54	-	124	126	18	56	0.5962	0.63	0.4865	0.448
Csl4	intronretention_Junction_1672	intronretentionleft-Junction_1672	J002	0.0110728	6.503	0.0107692	0.0948171	9.50384	10.5322	0.474479	chr2L	11123192	11123305	114	-	84	74	19	69	0.4038	0.37	0.5135	0.552
Csl4	intronretention_Junction_1672	intronretentionright-Junction_1672	J001	0.0225401	5.01923	0.0250673	0.164752	10.9481	9.98429	-0.438517	chr2L	11123257	11123310	54	-	124	126	18	56	0.7607	0.7	0.6429	0.5437
Csl4	intronretention_Junction_1672	intronretentionright-Junction_1672	J002	0.0228636	4.9783	0.0256673	0.166883	7.94581	9.16136	0.595883	chr2L	11123263	11123379	117	-	39	54	10	47	0.2393	0.3	0.3571	0.4563	-0.144764
Iap2	intronretention_Junction_17105	intronretentionleft-Junction_17105	J001	0.00960188	6.94177	0.00842059	0.079891	11.8614	11.0035	-0.380873	chr2R	11821324	11821702	379	-	141	159	18	95	0.6104	0.6187	0.4186	0.4922
Iap2	intronretention_Junction_17105	intronretentionleft-Junction_17105	J002	0.00963591	6.93222	0.00846566	0.0802116	10.3489	11.2911	0.424506	chr2R	11821261	11821372	112	-	90	98	25	98	0.3896	0.3813	0.5814	0.5078
Iap2	intronretention_Junction_17105	intronretentionright-Junction_17105	J001	0.00829142	16.6173	4.57313e-05	0.00152608	12.1264	10.7537	-0.609516	chr2R	11821324	11821702	379	-	141	159	18	95	0.4732	0.469	0.2466	0.3045
Iap2	intronretention_Junction_17105	intronretentionright-Junction_17105	J002	0.00826162	16.6441	4.50902e-05	0.00151001	12.5132	13.6081	0.472347	chr2R	11821655	11821773	119	-	157	180	55	217	0.5268	0.531	0.7534	0.6955	-0.155933
NONE	intronretention_Junction_17302	intronretentionleft-Junction_17302	J001	0.202552	12.328	0.000446216	0.0092185	6.58837	2.76053	-2.84757	chr2R	11958977	11959046	70	+	15	40	2	1	0.3191	0.6452	0.0392	0.05
NONE	intronretention_Junction_17302	intronretentionleft-Junction_17302	J002	0.199914	12.4395	0.000420344	0.00886417	6.43721	10.1232	1.85106	chr2R	11958910	11959025	116	+	32	22	49	19	0.6809	0.3548	0.9608	0.95
NONE	intronretention_Junction_17302	intronretentionright-Junction_17302	J001	0.183015	17.6661	2.63278e-05	0.000963947	7.29762	2.42439	-3.62439	chr2R	11958977	11959046	70	+	15	40	2	1	0.3488	0.625	0.0167	0.0667
NONE	intronretention_Junction_17302	intronretentionright-Junction_17302	J002	0.179287	17.9375	2.28282e-05	0.000848369	7.05598	11.5847	2.16764	chr2R	11958999	11959116	118	+	28	24	118	14	0.6512	0.375	0.9833	0.9333	-0.311935
CG8441	intronretention_Junction_17440	intronretentionleft-Junction_17440	J001	0.0155518	5.75179	0.0164718	0.125663	8.51641	9.62579	0.530701	chr2R	12073256	12073315	60	-	19	22	110	59	0.3393	0.44	0.5729	0.5413
CG8441	intronretention_Junction_17440	intronretentionleft-Junction_17440	J002	0.0155817	5.74743	0.0165128	0.125831	9.90067	8.84055	-0.500814	chr2R	12073196	12073304	109	-	37	28	82	50	0.6607	0.56	0.4271	0.4587
CG8441	intronretention_Junction_17440	intronretentionright-Junction_17440	J001	0.0171741	10.755	0.00104	0.0176162	8.4536	9.69938	0.59592	chr2R	12073256	12073315	60	-	19	22	110	59	0.5588	0.5789	0.7914	0.831
CG8441	intronretention_Junction_17440	intronretentionright-Junction_17440	J002	0.0177952	10.6525	0.0010992	0.0183947	7.64909	5.71679	-1.0778	chr2R	12073268	12073379	112	-	15	16	29	12	0.4412	0.4211	0.2086	0.169	0.192201
unc-104	intronretention_Junction_18042	intronretentionleft-Junction_18042	J001	0.0201604	8.12115	0.00437519	0.0508238	14.3771	13.3441	-0.441224	chr2R	12644668	12644736	69	-	256	239	114	174	0.7688	0.7331	0.5588	0.6444
unc-104	intronretention_Junction_18042	intronretentionleft-Junction_18042	J002	0.0202442	8.09782	0.00443186	0.0511128	10.7324	11.9654	0.54853	chr2R	12644601	12644716	116	-	77	87	90	96	0.2312	0.2669	0.4412	0.3556
unc-104	intronretention_Junction_18042	intronretentionright-Junction_18042	J001	0.0161318	11.6422	0.000644717	0.0121667	14.4195	13.3024	-0.477139	chr2R	12644668	12644736	69	-	256	239	114	174	0.7758	0.7685	0.5672	0.6517
unc-104	intronretention_Junction_18042	intronretentionright-Junction_18042	J002	0.0162165	11.6035	0.000658275	0.0123733	10.3902	11.8102	0.635496	chr2R	12644689	12644809	121	-	74	72	87	93	0.2242	0.2315	0.4328	0.3483	-0.179202
unc-104	intronretention_Junction_18045	intronretentionleft-Junction_18045	J001	0.00455244	16.5042	4.85418e-05	0.00160111	17.8775	17.1132	-0.318426	chr2R	12645192	12645251	60	-	1142	948	196	382	0.7196	0.7085	0.5816	0.6161
unc-104	intronretention_Junction_18045	intronretentionleft-Junction_18045	J002	0.00456063	16.4871	4.89828e-05	0.00161209	14.7252	15.6886	0.406465	chr2R	12645119	12645240	122	-	445	390	141	238	0.2804	0.2915	0.4184	0.3839
unc-104	intronretention_Junction_18045	intronretentionright-Junction_18045	J001	0.0126237	40.8337	1.65749e-10	3.03826e-08	18.3429	16.6295	-0.713901	chr2R	12645192	12645251	60	-	1142	948	196	382	0.8839	0.8918	0.6667	0.7304
unc-104	intronretention_Junction_18045	intronretentionright-Junction_18045	J002	0.0126842	40.6977	1.77697e-10	3.23017e-08	11.333	13.6858	1.02437	chr2R	12645204	12645322	119	-	150	115	98	141	0.1161	0.1082	0.3333	0.2696	-0.178676
Pkc53E	intronretention_Junction_18258	intronretentionleft-Junction_18258	J001	0.020016	8.11493	0.00439021	0.0508779	7.28372	5.7113	-0.890347	chr2R	12813250	12813849	600	+	31	19	10	13	0.5636	0.5	0.2632	0.3023
Pkc53E	intronretention_Junction_18258	intronretentionleft-Junction_18258	J002	0.0196705	8.15717	0.00428912	0.0501104	6.88717	8.17234	0.669306	chr2R	12813204	12813298	95	+	24	19	28	30	0.4364	0.5	0.7368	0.6977
Pkc53E	intronretention_Junction_18258	intronretentionright-Junction_18258	J001	0.015972	13.4373	0.000246667	0.00594435	7.67923	5.38122	-1.30277	chr2R	12813250	12813849	600	+	31	19	10	13	0.2183	0.1845	0.0671	0.0802
Pkc53E	intronretention_Junction_18258	intronretentionright-Junction_18258	J002	0.0152091	13.6584	0.000219259	0.00544293	11.8674	12.7974	0.405745	chr2R	12813802	12813898	97	+	111	84	139	149	0.7817	0.8155	0.9329	0.9198	-0.10914
CG8963	intronretention_Junction_18367	intronretentionleft-Junction_18367	J001	0.0633721	12.4638	0.000414921	0.00878266	3.71997	6.5488	1.90493	chr2R	12906854	12906936	83	-	6	1	27	18	0.0779	0.0156	0.2935	0.2022
CG8963	intronretention_Junction_18367	intronretentionleft-Junction_18367	J002	0.0594314	12.8524	0.000337049	0.00757988	11.4072	9.64105	-0.802913	chr2R	12906789	12906902	114	-	71	63	65	71	0.9221	0.9844	0.7065	0.7978
CG8963	intronretention_Junction_18367	intronretentionright-Junction_18367	J001	0.132368	4.72124	0.0297922	0.184268	4.15185	5.95659	1.21336	chr2R	12906854	12906936	83	-	6	1	27	18	0.375	0.0588	0.5294	0.5625
CG8963	intronretention_Junction_18367	intronretentionright-Junction_18367	J002	0.131046	4.74646	0.0293586	0.18257	7.24685	5.5698	-0.958142	chr2R	12906889	12906957	69	-	10	16	24	14	0.625	0.9412	0.4706	0.4375	0.163025
CG42239	intronretention_Junction_18814	intronretentionleft-Junction_18814	J001	0.0125402	17.5826	2.75101e-05	0.00100066	15.4876	14.1473	-0.567295	chr2R	13460538	13460606	69	+	351	351	208	128	0.6536	0.702	0.4664	0.5141
CG42239	intronretention_Junction_18814	intronretentionleft-Junction_18814	J002	0.012555	17.5676	2.77278e-05	0.00100589	12.9591	14.4146	0.623008	chr2R	13460465	13460586	122	+	186	149	238	121	0.3464	0.298	0.5336	0.4859
CG42239	intronretention_Junction_18814	intronretentionright-Junction_18814	J001	0.0201266	5.97722	0.0144919	0.115385	15.2548	14.404	-0.360029	chr2R	13460538	13460606	69	+	351	351	208	128	0.6855	0.7581	0.61	0.5818
CG42239	intronretention_Junction_18814	intronretentionright-Junction_18814	J002	0.0201723	5.96715	0.0145749	0.115803	12.0406	13.0069	0.420237	chr2R	13460559	13460676	118	+	161	112	133	92	0.3145	0.2419	0.39	0.4182	-0.170894
sbb	intronretention_Junction_19432	intronretentionleft-Junction_19432	J001	0.00849879	43.6406	3.94567e-11	8.40813e-09	13.1233	10.8861	-0.982681	chr2R	14243560	14244641	1082	-	191	163	71	58	0.4569	0.4895	0.232	0.2
sbb	intronretention_Junction_19432	intronretentionleft-Junction_19432	J002	0.00846853	43.7252	3.77883e-11	8.17506e-09	13.4977	15.1912	0.719899	chr2R	14243498	14243608	111	-	227	170	235	232	0.5431	0.5105	0.768	0.8
sbb	intronretention_Junction_19432	intronretentionright-Junction_19432	J001	0.0432039	6.58166	0.0103035	0.0922047	12.7188	11.3446	-0.602856	chr2R	14243560	14244641	1082	-	191	163	71	58	0.3963	0.5397	0.271	0.2816
sbb	intronretention_Junction_19432	intronretentionright-Junction_19432	J002	0.0431469	6.58891	0.0102616	0.0919193	13.3056	14.6065	0.555103	chr2R	14244594	14244712	119	-	291	139	191	148	0.6037	0.4603	0.729	0.7184	-0.169728
Phb2	intronretention_Junction_19859	intronretentionleft-Junction_19859	J001	0.0162552	8.89615	0.00285772	0.0372158	14.1936	13.0983	-0.469001	chr2R	14708788	14708993	206	+	211	179	146	171	0.3071	0.3442	0.2351	0.1861
Phb2	intronretention_Junction_19859	intronretentionleft-Junction_19859	J002	0.0162213	8.91124	0.0028342	0.0369942	16.7066	17.6397	0.389234	chr2R	14708717	14708836	120	+	476	341	475	748	0.6929	0.6558	0.7649	0.8139
Phb2	intronretention_Junction_19859	intronretentionright-Junction_19859	J001	0.00501047	55.9436	7.45807e-14	2.69427e-11	14.5872	12.6924	-0.811708	chr2R	14708788	14708993	206	+	211	179	146	171	0.5894	0.6109	0.3419	0.3308
Phb2	intronretention_Junction_19859	intronretentionright-Junction_19859	J002	0.00500446	55.976	7.33594e-14	2.69286e-11	13.2258	14.9964	0.754471	chr2R	14708946	14709058	113	+	147	114	281	346	0.4106	0.3891	0.6581	0.6692	-0.119146
Jheh2	intronretention_Junction_19912	intronretentionleft-Junction_19912	J001	0.0206169	6.56864	0.0103791	0.0927355	13.6853	12.5826	-0.475216	chr2R	14744196	14744387	192	-	207	185	0	265	0.7089	0.752	INF	0.5675
Jheh2	intronretention_Junction_19912	intronretentionleft-Junction_19912	J002	0.0207734	6.53078	0.0106024	0.0941538	10.4255	11.7203	0.579832	chr2R	14744121	14744244	124	-	85	61	0	202	0.2911	0.248	INF	0.4325
Jheh2	intronretention_Junction_19912	intronretentionright-Junction_19912	J001	0.0189199	6.8072	0.00907909	0.0841598	13.6332	12.6443	-0.426151	chr2R	14744196	14744387	192	-	207	185	0	265	0.8519	0.8296	INF	0.7124
Jheh2	intronretention_Junction_19912	intronretentionright-Junction_19912	J002	0.0193753	6.70133	0.00963409	0.0878728	8.32854	9.83058	0.718714	chr2R	14744340	14744453	114	-	36	38	0	107	0.1481	0.1704	INF	0.2876	-0.179581
Fak	intronretention_Junction_20348	intronretentionleft-Junction_20348	J001	0.0683139	10.0552	0.0015192	0.0234631	11.2212	9.26843	-0.895507	chr2R	15319067	15319130	64	-	77	74	24	85	0.6754	0.7327	0.2892	0.467
Fak	intronretention_Junction_20348	intronretentionleft-Junction_20348	J002	0.0683859	10.0473	0.00152573	0.0235384	8.5339	10.5354	0.940921	chr2R	15319001	15319115	115	-	37	27	59	97	0.3246	0.2673	0.7108	0.533
Fak	intronretention_Junction_20348	intronretentionright-Junction_20348	J001	0.0615224	12.8484	0.000337761	0.00758989	11.2524	9.24327	-0.921342	chr2R	15319067	15319130	64	-	77	74	24	85	0.8851	0.7789	0.4528	0.5629
Fak	intronretention_Junction_20348	intronretentionright-Junction_20348	J002	0.0622639	12.7489	0.000356211	0.00789228	6.60717	8.90925	1.18507	chr2R	15319083	15319201	119	-	10	21	29	66	0.1149	0.2211	0.5472	0.4371	-0.335249
CG17337	intronretention_Junction_20677	intronretentionleft-Junction_20677	J001	0.0362518	10.0255	0.00154388	0.0237346	13.7296	12.1297	-0.69163	chr2R	1587493	1587546	54	+	182	185	94	126	0.5353	0.6424	0.323	0.3975
CG17337	intronretention_Junction_20677	intronretentionleft-Junction_20677	J002	0.0362375	10.0288	0.00154111	0.0236985	12.5418	14.12	0.678518	chr2R	1587420	1587541	122	+	158	103	197	191	0.4647	0.3576	0.677	0.6025
CG17337	intronretention_Junction_20677	intronretentionright-Junction_20677	J001	0.0731495	10.5711	0.00114872	0.0190107	14.1074	11.7663	-1.01255	chr2R	1587493	1587546	54	+	182	185	94	126	0.5652	0.6607	0.2298	0.3761
CG17337	intronretention_Junction_20677	intronretentionright-Junction_20677	J002	0.073093	10.5786	0.00114407	0.0189613	12.5652	14.8849	0.992936	chr2R	1587499	1587619	121	+	140	95	315	209	0.4348	0.3393	0.7702	0.6239	-0.233768
RIC-3	intronretention_Junction_21441	intronretentionleft-Junction_21441	J001	0.0196324	4.51413	0.0336159	0.200026	10.257	10.9107	0.296369	chr2R	16911091	16911165	75	+	57	41	72	130	0.7808	0.7455	0.8471	0.8904
RIC-3	intronretention_Junction_21441	intronretentionleft-Junction_21441	J002	0.0207419	4.42935	0.0353259	0.206444	6.81294	5.48487	-0.777256	chr2R	16911045	16911139	95	+	16	14	13	16	0.2192	0.2545	0.1529	0.1096
RIC-3	intronretention_Junction_21441	intronretentionright-Junction_21441	J001	0.0321625	5.02803	0.0249403	0.164133	10.0266	11.138	0.504087	chr2R	16911091	16911165	75	+	57	41	72	130	0.4191	0.5541	0.6792	0.628
RIC-3	intronretention_Junction_21441	intronretentionright-Junction_21441	J002	0.0322874	5.0146	0.0251344	0.164983	10.4082	9.22664	-0.548993	chr2R	16911118	16911219	102	+	79	33	34	77	0.5809	0.4459	0.3208	0.372	0.173546
RpL29	intronretention_Junction_21723	intronretentionleft-Junction_21723	J001	0.0106136	55.0727	1.16153e-13	3.95734e-11	23.8374	22.0215	-0.748399	chr2R	17181379	17181557	179	+	4422	4699	1007	1991	0.9367	0.9459	0.816	0.8436
RpL29	intronretention_Junction_21723	intronretentionleft-Junction_21723	J002	0.0106331	54.9881	1.2126e-13	4.10674e-11	14.1839	16.4662	0.962395	chr2R	17181306	17181427	122	+	299	269	227	369	0.0633	0.0541	0.184	0.1564
RpL29	intronretention_Junction_21723	intronretentionright-Junction_21723	J001	0.00991857	25.1595	5.27802e-07	3.51232e-05	23.5632	22.2957	-0.522374	chr2R	17181379	17181557	179	+	4422	4699	1007	1991	0.5306	0.5826	0.3664	0.3904
RpL29	intronretention_Junction_21723	intronretentionright-Junction_21723	J002	0.00991855	25.1595	5.27794e-07	3.51232e-05	22.7461	24.0083	0.519976	chr2R	17181510	17181630	121	+	3912	3367	1741	3109	0.4694	0.4174	0.6336	0.6096	-0.186724
CG31922	intronretention_Junction_2173	intronretentionleft-Junction_2173	J001	0.0133275	5.67426	0.0172156	0.129498	8.41497	9.42261	0.485239	chr2L	1170363	1170417	55	+	18	21	89	76	0.4091	0.4884	0.6138	0.6333
CG31922	intronretention_Junction_2173	intronretentionleft-Junction_2173	J002	0.0134318	5.66098	0.0173465	0.130155	9.02404	7.93136	-0.537622	chr2L	1170296	1170411	116	+	26	22	56	44	0.5909	0.5116	0.3862	0.3667
CG31922	intronretention_Junction_2173	intronretentionright-Junction_2173	J001	0.0148472	4.14491	0.0417598	0.229611	8.45612	9.38442	0.446958	chr2L	1170363	1170417	55	+	18	21	89	76	0.375	0.4468	0.5817	0.5352
CG31922	intronretention_Junction_2173	intronretentionright-Junction_2173	J002	0.0148831	4.14141	0.0418463	0.229908	9.53616	8.6314	-0.432466	chr2L	1170370	1170487	118	+	30	26	64	66	0.625	0.5532	0.4183	0.4648	0.143424
CG4887	intronretention_Junction_2196	intronretentionleft-Junction_2196	J001	0.0222108	9.26432	0.00233662	0.0321917	12.1109	10.8464	-0.560927	chr2L	1174987	1175045	59	+	98	103	89	73	0.5414	0.6205	0.4218	0.3527
CG4887	intronretention_Junction_2196	intronretentionleft-Junction_2196	J002	0.0221942	9.26893	0.00233074	0.0321625	11.0423	12.2877	0.550244	chr2L	1174914	1175035	122	+	83	63	122	134	0.4586	0.3795	0.5782	0.6473
CG4887	intronretention_Junction_2196	intronretentionright-Junction_2196	J001	0.0692052	5.68055	0.017154	0.129247	12.2368	10.7641	-0.653072	chr2L	1174987	1175045	59	+	98	103	89	73	0.6853	0.7863	0.5894	0.432
CG4887	intronretention_Junction_2196	intronretentionright-Junction_2196	J002	0.0693923	5.668	0.0172771	0.129806	8.97583	10.5225	0.720709	chr2L	1174998	1175116	119	+	45	28	62	96	0.3147	0.2137	0.4106	0.568	-0.198812
CG10306	intronretention_Junction_22093	intronretentionleft-Junction_22093	J001	0.099049	7.75168	0.00536626	0.0585472	9.29117	6.73138	-1.29842	chr2R	17572951	17573016	66	+	46	59	0	36	0.3802	0.5514	INF	0.1374
CG10306	intronretention_Junction_22093	intronretentionleft-Junction_22093	J002	0.097937	7.83092	0.005136	0.0569525	9.70951	12.1071	1.07953	chr2R	17572884	17572999	116	+	75	48	0	226	0.6198	0.4486	INF	0.8626
CG10306	intronretention_Junction_22093	intronretentionright-Junction_22093	J001	0.0350755	11.3936	0.000736971	0.01355	8.97389	7.11294	-0.939594	chr2R	17572951	17573016	66	+	46	59	0	36	0.7188	0.7867	INF	0.4138
CG10306	intronretention_Junction_22093	intronretentionright-Junction_22093	J002	0.0360647	11.213	0.000812245	0.0146202	5.87435	8.04075	1.18186	chr2R	17572969	17573078	110	+	18	16	0	51	0.2812	0.2133	INF	0.5862	-0.290289
qkr58E-3	intronretention_Junction_22482	intronretentionleft-Junction_22482	J001	0.0231326	5.57176	0.0182524	0.134854	12.222	11.2028	-0.449799	chr2R	18297901	18298042	142	-	130	137	55	92	0.4676	0.5708	0.3767	0.3651
qkr58E-3	intronretention_Junction_22482	intronretentionleft-Junction_22482	J002	0.0231089	5.57581	0.0182102	0.134612	11.98	12.9475	0.421141	chr2R	18297830	18297949	120	-	148	103	91	160	0.5324	0.4292	0.6233	0.6349
qkr58E-3	intronretention_Junction_22482	intronretentionright-Junction_22482	J001	0.0163962	8.45986	0.00363071	0.0444959	12.2795	11.1482	-0.499313	chr2R	18297901	18298042	142	-	130	137	55	92	0.4815	0.5547	0.3333	0.377
qkr58E-3	intronretention_Junction_22482	intronretentionright-Junction_22482	J002	0.0163722	8.46762	0.00361524	0.0443694	12.0377	13.0848	0.455086	chr2R	18297995	18298111	117	-	140	110	110	152	0.5185	0.4453	0.6667	0.623	-0.129933
robo	intronretention_Junction_22694	intronretentionleft-Junction_22694	J001	0.0340651	9.10275	0.00255225	0.0342894	8.17009	6.57692	-0.839623	chr2R	18584988	18585048	61	-	47	37	0	28	0.7966	0.74	INF	0.4516
robo	intronretention_Junction_22694	intronretentionleft-Junction_22694	J002	0.0356578	8.90162	0.00284918	0.0371388	5.08868	7.06515	1.16997	chr2R	18584920	18585036	117	-	12	13	0	34	0.2034	0.26	INF	0.5484
robo	intronretention_Junction_22694	intronretentionright-Junction_22694	J001	0.0277171	7.2766	0.00698586	0.0703929	8.12727	6.63261	-0.787089	chr2R	18584988	18585048	61	-	47	37	0	28	0.662	0.6066	INF	0.3636
robo	intronretention_Junction_22694	intronretentionright-Junction_22694	J002	0.0279511	7.24585	0.00710649	0.0713118	6.60677	8.11117	0.793438	chr2R	18585001	18585114	114	-	24	24	0	49	0.338	0.3934	INF	0.6364	-0.28088
l(2)k09913	intronretention_Junction_23013	intronretentionleft-Junction_23013	J001	0.0163658	8.7133	0.00315898	0.0401018	16.1017	15.0452	-0.444559	chr2R	18958411	18958486	76	+	333	389	144	417	0.7433	0.7749	0.6698	0.5974
l(2)k09913	intronretention_Junction_23013	intronretentionleft-Junction_23013	J002	0.0164089	8.69485	0.0031911	0.0404155	12.1816	13.4271	0.539361	chr2R	18958342	18958459	118	+	115	113	71	281	0.2567	0.2251	0.3302	0.4026
l(2)k09913	intronretention_Junction_23013	intronretentionright-Junction_23013	J001	0.0209547	15.7167	7.35723e-05	0.00227379	16.2865	14.8557	-0.60214	chr2R	18958411	18958486	76	+	333	389	144	417	0.7367	0.789	0.5275	0.5957
l(2)k09913	intronretention_Junction_23013	intronretentionright-Junction_23013	J002	0.0209917	15.6951	7.44185e-05	0.00229371	12.2752	13.8784	0.691622	chr2R	18958439	18958556	118	+	119	104	129	283	0.2633	0.211	0.4725	0.4043	-0.192767
CG3530	intronretention_Junction_23157	intronretentionleft-Junction_23157	J001	0.101704	9.08008	0.00258409	0.0346142	19.7296	17.5002	-0.925413	chr2R	19277181	19277240	60	-	2052	2353	104	450	0.6502	0.7242	0.2543	0.4582
CG3530	intronretention_Junction_23157	intronretentionleft-Junction_23157	J002	0.101723	9.07843	0.00258642	0.0346258	16.9429	19.174	0.927704	chr2R	19277111	19277229	119	-	1104	896	305	532	0.3498	0.2758	0.7457	0.5418
CG3530	intronretention_Junction_23157	intronretentionright-Junction_23157	J001	0.0900538	9.54981	0.00199971	0.028819	19.6899	17.5412	-0.891901	chr2R	19277181	19277240	60	-	2052	2353	104	450	0.6105	0.6803	0.2337	0.4171
CG3530	intronretention_Junction_23157	intronretentionright-Junction_23157	J002	0.0900648	9.54869	0.00200093	0.0288193	17.561	19.71	0.891931	chr2R	19277193	19277314	122	-	1309	1106	341	629	0.3895	0.3197	0.7663	0.5829	-0.290938
CG5554	intronretention_Junction_23507	intronretentionleft-Junction_23507	J001	0.0121793	4.77127	0.0289385	0.180717	12.4637	11.7193	-0.326141	chr2R	19732854	19733056	203	+	142	130	34	156	0.5318	0.5936	0.4416	0.4483
CG5554	intronretention_Junction_23507	intronretentionleft-Junction_23507	J002	0.0121825	4.77057	0.0289502	0.180751	11.6565	12.4061	0.328781	chr2R	19732784	19732902	119	+	125	89	43	192	0.4682	0.4064	0.5584	0.5517
CG5554	intronretention_Junction_23507	intronretentionright-Junction_23507	J001	0.0442983	4.20437	0.04032	0.22469	12.5392	11.5625	-0.428223	chr2R	19732854	19733056	203	+	142	130	34	156	0.5145	0.6103	0.3301	0.4444
CG5554	intronretention_Junction_23507	intronretentionright-Junction_23507	J002	0.0442875	4.20513	0.040302	0.224612	11.7547	12.7251	0.42399	chr2R	19733009	19733127	119	+	134	83	69	195	0.4855	0.3897	0.6699	0.5556	-0.132204
Ca-P60A	intronretention_Junction_23652	intronretentionleft-Junction_23652	J001	0.0663793	8.15846	0.00428606	0.0500851	14.8912	13.2499	-0.699636	chr2R	19816954	19817021	68	-	351	307	49	216	0.7405	0.7812	0.4083	0.5983
Ca-P60A	intronretention_Junction_23652	intronretentionleft-Junction_23652	J002	0.0665137	8.14441	0.00431942	0.0503301	11.0457	12.7432	0.746848	chr2R	19816886	19817002	117	-	123	86	71	145	0.2595	0.2188	0.5917	0.4017
Ca-P60A	intronretention_Junction_23652	intronretentionright-Junction_23652	J001	0.0488737	4.7456	0.0293734	0.182611	14.7815	13.3685	-0.602212	chr2R	19816954	19817021	68	-	351	307	49	216	0.7565	0.6792	0.6282	0.4887
Ca-P60A	intronretention_Junction_23652	intronretentionright-Junction_23652	J002	0.0489565	4.73797	0.0295039	0.183062	11.6889	13.1562	0.639332	chr2R	19816974	19817090	117	-	113	145	29	226	0.2435	0.3208	0.3718	0.5113	-0.235878
Tal	intronretention_Junction_23675	intronretentionleft-Junction_23675	J001	0.0142852	6.36619	0.0116315	0.0995183	14.3584	13.4537	-0.386199	chr2R	19828703	19828761	59	+	163	197	0	456	0.7799	0.7817	INF	0.6561
Tal	intronretention_Junction_23675	intronretentionleft-Junction_23675	J002	0.014435	6.32033	0.0119361	0.100942	10.163	11.3941	0.555395	chr2R	19828631	19828751	121	+	46	55	0	239	0.2201	0.2183	INF	0.3439
Tal	intronretention_Junction_23675	intronretentionright-Junction_23675	J001	0.0158978	10.4761	0.00120932	0.019744	14.4918	13.311	-0.504162	chr2R	19828703	19828761	59	+	163	197	0	456	0.8232	0.8277	INF	0.6686
Tal	intronretention_Junction_23675	intronretentionright-Junction_23675	J002	0.0161006	10.3852	0.00127032	0.0205486	9.39943	11.08	0.770479	chr2R	19828714	19828833	120	+	35	41	0	226	0.1768	0.1723	INF	0.3314	-0.17508
CG3907	intronretention_Junction_23829	intronretentionleft-Junction_23829	J001	0.0166041	6.12102	0.0133583	0.108936	18.9593	18.163	-0.330538	chr2R	19907844	19907905	62	-	1054	890	451	684	0.6709	0.7283	0.6103	0.5729
CG3907	intronretention_Junction_23829	intronretentionleft-Junction_23829	J002	0.0166139	6.11781	0.0133827	0.109057	16.0605	16.9006	0.351584	chr2R	19907772	19907892	121	-	517	332	288	510	0.3291	0.2717	0.3897	0.4271
CG3907	intronretention_Junction_23829	intronretentionright-Junction_23829	J001	0.00284711	14.9158	0.000112417	0.00317745	18.834	18.292	-0.224967	chr2R	19907844	19907905	62	-	1054	890	451	684	0.7739	0.778	0.6949	0.7001
CG3907	intronretention_Junction_23829	intronretentionright-Junction_23829	J002	0.00285243	14.9014	0.000113279	0.00319863	14.5553	15.4051	0.359157	chr2R	19907858	19907975	118	-	308	254	198	293	0.2261	0.222	0.3051	0.2999	-0.111304
sei	intronretention_Junction_23929	intronretentionleft-Junction_23929	J001	0.014695	6.34188	0.011792	0.100273	12.6849	13.4511	0.33047	chr2R	19939692	19939916	225	+	109	91	187	256	0.7315	0.6547	0.813	0.8
sei	intronretention_Junction_23929	intronretentionleft-Junction_23929	J002	0.0148983	6.29783	0.0120886	0.101897	10.044	8.8742	-0.550794	chr2R	19939624	19939740	117	+	40	48	43	64	0.2685	0.3453	0.187	0.2
sei	intronretention_Junction_23929	intronretentionright-Junction_23929	J001	0.0304601	5.82837	0.0157697	0.122165	12.5236	13.6162	0.471266	chr2R	19939692	19939916	225	+	109	91	187	256	0.3949	0.4333	0.6339	0.5246
sei	intronretention_Junction_23929	intronretentionright-Junction_23929	J002	0.0304664	5.82741	0.0157784	0.122175	13.7042	12.6155	-0.46905	chr2R	19939869	19939987	119	+	167	119	108	232	0.6051	0.5667	0.3661	0.4754	0.159686
RpL12	intronretention_Junction_23971	intronretentionleft-Junction_23971	J001	0.012058	7.12408	0.00760554	0.0746319	26.4951	25.786	-0.291714	chr2R	19948272	19948334	63	+	9562	10230	2692	6048	0.6253	0.6515	0.5072	0.5669
RpL12	intronretention_Junction_23971	intronretentionleft-Junction_23971	J002	0.0120584	7.12384	0.00760656	0.0746319	24.4848	25.1977	0.293413	chr2R	19948199	19948320	122	+	5731	5472	2616	4620	0.3747	0.3485	0.4928	0.4331
RpL12	intronretention_Junction_23971	intronretentionright-Junction_23971	J001	0.00521722	15.593	7.85437e-05	0.0023933	26.4971	25.7871	-0.292103	chr2R	19948272	19948334	63	+	9562	10230	2692	6048	0.7154	0.7402	0.6275	0.6494
RpL12	intronretention_Junction_23971	intronretentionright-Junction_23971	J002	0.00521777	15.5915	7.86091e-05	0.0023933	23.0297	23.7636	0.302316	chr2R	19948287	19948408	122	+	3804	3590	1598	3265	0.2846	0.2598	0.3725	0.3506	-0.103548
IA-2	intronretention_Junction_248	intronretentionleft-Junction_248	J001	0.013853	12.3406	0.000443211	0.00918064	19.4762	18.4122	-0.441211	chr2L	1016076	1016137	62	-	1079	886	688	659	0.7127	0.7547	0.5733	0.6188
IA-2	intronretention_Junction_248	intronretentionleft-Junction_248	J002	0.0138617	12.3338	0.000444839	0.00919695	15.9898	17.1305	0.477197	chr2L	1016006	1016124	119	-	435	288	512	406	0.2873	0.2453	0.4267	0.3812
IA-2	intronretention_Junction_248	intronretentionright-Junction_248	J001	0.0161677	10.6857	0.00107966	0.0181173	19.4549	18.4351	-0.422896	chr2L	1016076	1016137	62	-	1079	886	688	659	0.577	0.6448	0.4784	0.4408
IA-2	intronretention_Junction_248	intronretentionright-Junction_248	J002	0.016169	10.6849	0.00108014	0.0181181	17.9287	18.9584	0.427583	chr2L	1016090	1016211	122	-	791	488	750	836	0.423	0.3552	0.5216	0.5592	-0.150863
Nplp1	intronretention_Junction_24967	intronretentionleft-Junction_24967	J001	0.0827269	4.25144	0.0392171	0.220771	13.8911	12.1827	-0.737495	chr2R	20924235	20924370	136	+	159	185	120	123	0.6737	0.74	0.3987	0.6
Nplp1	intronretention_Junction_24967	intronretentionleft-Junction_24967	J002	0.0828009	4.24794	0.039298	0.221138	10.9291	12.6624	0.764064	chr2R	20924170	20924283	114	+	77	65	181	82	0.3263	0.26	0.6013	0.4
Nplp1	intronretention_Junction_24967	intronretentionright-Junction_24967	J001	0.0449852	4.78828	0.028654	0.179472	13.6928	12.3679	-0.571888	chr2R	20924235	20924370	136	+	159	185	120	123	0.636	0.6777	0.411	0.5591
Nplp1	intronretention_Junction_24967	intronretentionright-Junction_24967	J002	0.0450179	4.78527	0.0287041	0.179668	11.5031	12.8619	0.594483	chr2R	20924323	20924442	120	+	91	88	172	97	0.364	0.3223	0.589	0.4409	-0.186296
ubl	intronretention_Junction_25421	intronretentionleft-Junction_25421	J001	0.0106625	4.38999	0.0361506	0.209563	15.7247	15.147	-0.243287	chr2R	2697640	2697704	65	-	534	524	162	170	0.652	0.6987	0.6022	0.5763
ubl	intronretention_Junction_25421	intronretentionleft-Junction_25421	J002	0.0106814	4.38475	0.0362619	0.209985	13.2307	13.9	0.286853	chr2R	2697572	2697688	117	-	285	226	107	125	0.348	0.3013	0.3978	0.4237
ubl	intronretention_Junction_25421	intronretentionright-Junction_25421	J001	0.0072699	7.43095	0.00641115	0.0660705	15.7328	15.1281	-0.254689	chr2R	2697640	2697704	65	-	534	524	162	170	0.7796	0.8025	0.6923	0.7143
ubl	intronretention_Junction_25421	intronretentionright-Junction_25421	J002	0.00731563	7.40817	0.00649283	0.0666948	11.2611	12.2106	0.418804	chr2R	2697657	2697774	118	-	151	129	72	68	0.2204	0.1975	0.3077	0.2857	-0.101627
Tsp42Ee	intronretention_Junction_25673	intronretentionleft-Junction_25673	J001	0.00739793	21.0375	4.50382e-06	0.00022014	18.269	17.2713	-0.415248	chr2R	2905131	2905193	63	+	585	616	251	980	0.7708	0.7847	0.6152	0.6586
Tsp42Ee	intronretention_Junction_25673	intronretentionleft-Junction_25673	J002	0.00741213	21.0106	4.56747e-06	0.000222838	13.9509	15.215	0.536134	chr2R	2905064	2905179	116	+	174	169	157	508	0.2292	0.2153	0.3848	0.3414
Tsp42Ee	intronretention_Junction_25673	intronretentionright-Junction_25673	J001	0.0193441	5.34538	0.0207772	0.146094	18.113	17.3976	-0.297731	chr2R	2905131	2905193	63	+	585	616	251	980	0.7267	0.7171	0.5666	0.6538
Tsp42Ee	intronretention_Junction_25673	intronretentionright-Junction_25673	J002	0.0193612	5.34149	0.0208237	0.146218	14.8318	15.6015	0.324709	chr2R	2905146	2905262	117	+	220	243	192	519	0.2733	0.2829	0.4334	0.3462	-0.145073
CG30491	intronretention_Junction_26500	intronretentionleft-Junction_26500	J001	0.031206	6.35285	0.0117193	0.0999238	9.14606	7.86853	-0.627816	chr2R	3543396	3543447	52	+	45	46	0	59	0.7258	0.7797	INF	0.5175
CG30491	intronretention_Junction_26500	intronretentionleft-Junction_26500	J002	0.0321761	6.2468	0.0124418	0.104091	6.0665	7.67513	0.881487	chr2R	3543337	3543444	108	+	17	13	0	55	0.2742	0.2203	INF	0.4825
CG30491	intronretention_Junction_26500	intronretentionright-Junction_26500	J001	0.0253813	4.4585	0.0347279	0.204165	9.02353	8.00654	-0.499362	chr2R	3543396	3543447	52	+	45	46	0	59	0.7258	0.697	INF	0.5221
CG30491	intronretention_Junction_26500	intronretentionright-Junction_26500	J002	0.0260226	4.40175	0.0359022	0.208569	6.50407	7.76219	0.674252	chr2R	3543400	3543507	108	+	17	20	0	54	0.2742	0.303	INF	0.4779	-0.224759
rnh1	intronretention_Junction_26793	intronretentionleft-Junction_26793	J001	0.0239781	10.3716	0.00127967	0.0206786	11.0245	9.719	-0.595844	chr2R	3819351	3819402	52	-	88	95	48	42	0.7213	0.7851	0.5783	0.4884
rnh1	intronretention_Junction_26793	intronretentionleft-Junction_26793	J002	0.0242771	10.305	0.00132672	0.0212339	7.62189	9.26252	0.809614	chr2R	3819293	3819399	107	-	34	26	35	44	0.2787	0.2149	0.4217	0.5116
rnh1	intronretention_Junction_26793	intronretentionright-Junction_26793	J001	0.0455168	10.2755	0.00134812	0.0214977	11.2658	9.51465	-0.799223	chr2R	3819351	3819402	52	-	88	95	48	42	0.8381	0.7917	0.4898	0.6462
rnh1	intronretention_Junction_26793	intronretentionright-Junction_26793	J002	0.0460674	10.1935	0.00140935	0.0222249	6.88423	8.98115	1.06671	chr2R	3819355	3819456	102	-	17	25	50	23	0.1619	0.2083	0.5102	0.3538	-0.268778
Lpin	intronretention_Junction_27220	intronretentionleft-Junction_27220	J001	0.0280045	36.7366	1.35218e-09	1.89494e-07	9.78759	6.59027	-1.60974	chr2R	4027876	4028017	142	-	132	90	0	18	0.8627	0.8257	INF	0.2903
Lpin	intronretention_Junction_27220	intronretentionleft-Junction_27220	J002	0.0292888	35.9146	2.06156e-09	2.79278e-07	5.17567	9.01836	2.09922	chr2R	4027825	4027924	100	-	21	19	0	44	0.1373	0.1743	INF	0.7097
Lpin	intronretention_Junction_27220	intronretentionright-Junction_27220	J001	0.0593271	12.5302	0.000400417	0.00856807	9.21546	7.01758	-1.10624	chr2R	4027876	4028017	142	-	132	90	0	18	0.9041	0.8411	INF	0.4865
Lpin	intronretention_Junction_27220	intronretentionright-Junction_27220	J002	0.0631895	12.0906	0.00050676	0.0101418	4.28214	7.15147	1.78575	chr2R	4027970	4028062	93	-	14	17	0	19	0.0959	0.1589	INF	0.5135	-0.53013
Acsl	intronretention_Junction_27697	intronretentionleft-Junction_27697	J001	0.0203411	12.6297	0.000379668	0.00826166	11.835	13.2537	0.616901	chr2R	4567991	4568052	62	+	130	111	0	304	0.5963	0.5441	INF	0.7917
Acsl	intronretention_Junction_27697	intronretentionleft-Junction_27697	J002	0.0205468	12.5378	0.000398794	0.00853978	10.9227	9.12889	-0.828261	chr2R	4567924	4568039	116	+	88	93	0	80	0.4037	0.4559	INF	0.2083
Acsl	intronretention_Junction_27697	intronretentionright-Junction_27697	J001	0.0230793	10.7741	0.00102932	0.0175031	11.7883	13.2874	0.65196	chr2R	4567991	4568052	62	+	130	111	0	304	0.5	0.4387	INF	0.7021
Acsl	intronretention_Junction_27697	intronretentionright-Junction_27697	J002	0.023146	10.7493	0.00104318	0.0176648	12.2093	10.5815	-0.723632	chr2R	4568005	4568116	112	+	130	142	0	129	0.5	0.5613	INF	0.2979	0.245406
CG17486	intronretention_Junction_28377	intronretentionleft-Junction_28377	J001	0.340325	5.69986	0.0169663	0.128062	4.21639	7.74051	2.14384	chr2R	507701	507764	64	+	5	2	72	11	0.0365	0.0169	0.3711	0.1019
CG17486	intronretention_Junction_28377	intronretentionleft-Junction_28377	J002	0.337723	5.73761	0.0166053	0.126313	14.3993	10.3518	-1.77033	chr2R	507655	507749	95	+	132	116	122	97	0.9635	0.9831	0.6289	0.8981
CG17486	intronretention_Junction_28377	intronretentionright-Junction_28377	J001	0.531853	4.49874	0.0339198	0.201286	4.0969	7.92532	2.33048	chr2R	507701	507764	64	+	5	2	72	11	0.045	0.0247	0.6372	0.1134
CG17486	intronretention_Junction_28377	intronretentionright-Junction_28377	J002	0.529426	4.51757	0.0335484	0.199836	13.18	8.60455	-2.0719	chr2R	507717	507815	99	+	106	79	41	86	0.955	0.9753	0.3628	0.8866	0.166178
CG33774	intronretention_Junction_28581	intronretentionleft-Junction_28581	J001	0.0345594	8.74	0.00311304	0.0397359	17.2902	15.8545	-0.600593	chr2R	5287373	5287451	79	-	509	502	340	320	0.705	0.7832	0.5239	0.6015
CG33774	intronretention_Junction_28581	intronretentionleft-Junction_28581	J002	0.0345886	8.73333	0.00312446	0.0398418	13.6326	15.131	0.636678	chr2R	5287300	5287421	122	-	213	139	309	212	0.295	0.2168	0.4761	0.3985
CG33774	intronretention_Junction_28581	intronretentionright-Junction_28581	J001	0.15126	6.90795	0.00858134	0.0809296	18.039	15.1233	-1.2202	chr2R	5287373	5287451	79	-	509	502	340	320	0.7574	0.8581	0.3644	0.6154
CG33774	intronretention_Junction_28581	intronretentionright-Junction_28581	J002	0.151304	6.90597	0.00859086	0.0809664	13.123	16.035	1.23599	chr2R	5287404	5287524	121	-	163	83	593	200	0.2426	0.1419	0.6356	0.3846	-0.2788
cbx	intronretention_Junction_29020	intronretentionleft-Junction_29020	J001	0.0255147	14.3537	0.000151482	0.00403947	15.4297	13.9181	-0.640584	chr2R	5752574	5752627	54	-	251	238	193	275	0.7515	0.8264	0.5643	0.6057
cbx	intronretention_Junction_29020	intronretentionleft-Junction_29020	J002	0.0255791	14.326	0.000153729	0.00408726	11.0403	12.7682	0.760081	chr2R	5752501	5752622	122	-	83	50	149	179	0.2485	0.1736	0.4357	0.3943
cbx	intronretention_Junction_29020	intronretentionright-Junction_29020	J001	0.015114	10.1587	0.00143622	0.0225549	15.1807	14.1628	-0.431313	chr2R	5752574	5752627	54	-	251	238	193	275	0.7151	0.7677	0.6206	0.5729
cbx	intronretention_Junction_29020	intronretentionright-Junction_29020	J002	0.0151589	10.1375	0.00145285	0.0227406	11.6539	12.8715	0.531879	chr2R	5752580	5752701	122	-	100	72	118	205	0.2849	0.2323	0.3794	0.4271	-0.201294
CG1513	intronretention_Junction_29049	intronretentionleft-Junction_29049	J001	0.00838639	17.2633	3.25414e-05	0.00114432	14.7134	13.6969	-0.432614	chr2R	5772213	5772269	57	-	230	278	110	238	0.7823	0.8012	0.6145	0.6538
CG1513	intronretention_Junction_29049	intronretentionleft-Junction_29049	J002	0.00844648	17.2041	3.35715e-05	0.00117329	10.2686	11.8078	0.689966	chr2R	5772144	5772261	118	-	64	69	69	126	0.2177	0.1988	0.3855	0.3462
CG1513	intronretention_Junction_29049	intronretentionright-Junction_29049	J001	0.0408121	4.96974	0.0257945	0.167442	14.7612	13.6245	-0.483879	chr2R	5772213	5772269	57	-	230	278	110	238	0.7188	0.8225	0.6358	0.6214
CG1513	intronretention_Junction_29049	intronretentionright-Junction_29049	J002	0.0409388	4.95708	0.0259841	0.168117	10.6529	11.9056	0.558175	chr2R	5772222	5772341	120	-	90	60	63	145	0.2812	0.1775	0.3642	0.3786	-0.179938
trsn	intronretention_Junction_30118	intronretentionleft-Junction_30118	J001	0.0121518	5.83575	0.0157037	0.121912	12.9848	12.2177	-0.333163	chr2R	6367102	6367163	62	-	131	150	111	123	0.6517	0.7143	0.5522	0.5748
trsn	intronretention_Junction_30118	intronretentionleft-Junction_30118	J002	0.012206	5.82178	0.0158289	0.122483	10.4461	11.3862	0.422521	chr2R	6367032	6367150	119	-	70	60	90	91	0.3483	0.2857	0.4478	0.4252
trsn	intronretention_Junction_30118	intronretentionright-Junction_30118	J001	0.0464035	4.92872	0.0264139	0.170173	13.2154	12.0214	-0.518509	chr2R	6367102	6367163	62	-	131	150	111	123	0.8618	0.8523	0.6607	0.7885
trsn	intronretention_Junction_30118	intronretentionright-Junction_30118	J002	0.0468731	4.89261	0.0269719	0.172197	7.61674	9.10756	0.73856	chr2R	6367116	6367221	106	-	21	26	57	33	0.1382	0.1477	0.3393	0.2115	-0.148738
CG7712	intronretention_Junction_30629	intronretentionleft-Junction_30629	J001	0.0161365	7.79703	0.00523321	0.0577154	21.0944	20.1886	-0.374304	chr2R	6785092	6785167	76	-	1051	1265	1524	1454	0.7867	0.8372	0.7142	0.7245
CG7712	intronretention_Junction_30629	intronretentionleft-Junction_30629	J002	0.016149	7.7916	0.00524896	0.0578219	15.9397	16.9291	0.41421	chr2R	6785022	6785140	119	-	285	246	610	553	0.2133	0.1628	0.2858	0.2755
CG7712	intronretention_Junction_30629	intronretentionright-Junction_30629	J001	0.0704171	5.34851	0.02074	0.145937	21.4101	19.8793	-0.632581	chr2R	6785092	6785167	76	-	1051	1265	1524	1454	0.8693	0.8902	0.8132	0.6753
CG7712	intronretention_Junction_30629	intronretentionright-Junction_30629	J002	0.0704677	5.34478	0.0207844	0.146122	14.4666	16.0272	0.658302	chr2R	6785120	6785241	122	-	158	156	350	699	0.1307	0.1098	0.1868	0.3247	-0.155739
san	intronretention_Junction_31014	intronretentionleft-Junction_31014	J001	0.0165638	6.01644	0.0141732	0.113659	14.1399	13.3608	-0.333182	chr2R	7248787	7249018	232	+	299	216	98	165	0.8059	0.834	0.7538	0.6846
san	intronretention_Junction_31014	intronretentionleft-Junction_31014	J002	0.0167717	5.9703	0.0145488	0.115725	9.26566	10.4107	0.531614	chr2R	7248723	7248835	113	+	72	43	32	76	0.1941	0.166	0.2462	0.3154
san	intronretention_Junction_31014	intronretentionright-Junction_31014	J001	0.00831682	8.62414	0.00331737	0.0416387	14.1382	13.3725	-0.327445	chr2R	7248787	7249018	232	+	299	216	98	165	0.6953	0.7036	0.5475	0.6022
san	intronretention_Junction_31014	intronretentionright-Junction_31014	J002	0.00835288	8.60573	0.00335107	0.0419784	11.3428	12.3222	0.43119	chr2R	7248971	7249086	116	+	131	91	81	109	0.3047	0.2964	0.4525	0.3978	-0.138438
Npc1a	intronretention_Junction_313	intronretentionleft-Junction_313	J001	0.0183956	5.71481	0.0168223	0.127374	10.9661	11.7077	0.329923	chr2L	10214991	10215056	66	-	48	66	73	209	0.6575	0.7253	0.8488	0.8069
Npc1a	intronretention_Junction_313	intronretentionleft-Junction_313	J002	0.0189056	5.65587	0.0173971	0.130471	8.40345	7.20279	-0.614069	chr2L	10214926	10215039	114	-	25	25	13	50	0.3425	0.2747	0.1512	0.1931
Npc1a	intronretention_Junction_313	intronretentionright-Junction_313	J001	0.0187814	17.9718	2.24207e-05	0.00083541	10.4687	12.2189	0.779044	chr2L	10214991	10215056	66	-	48	66	73	209	0.2667	0.3529	0.5448	0.5679
Npc1a	intronretention_Junction_313	intronretentionright-Junction_313	J002	0.018756	17.9876	2.22352e-05	0.000831362	13.049	11.4316	-0.707006	chr2L	10215009	10215128	120	-	132	121	61	159	0.7333	0.6471	0.4552	0.4321	0.225566
RpS11	intronretention_Junction_31947	intronretentionleft-Junction_31947	J001	0.0162187	3.91836	0.0477614	0.249182	24.9533	24.293	-0.271819	chr2R	8087544	8087619	76	-	4708	5040	2766	4491	0.6848	0.7306	0.6548	0.6016
RpS11	intronretention_Junction_31947	intronretentionleft-Junction_31947	J002	0.0162204	3.91797	0.0477727	0.249182	21.827	22.4961	0.27594	chr2R	8087473	8087592	120	-	2167	1858	1458	2974	0.3152	0.2694	0.3452	0.3984
RpS11	intronretention_Junction_31947	intronretentionright-Junction_31947	J001	0.0075608	24.1961	8.70066e-07	5.46467e-05	25.1713	24.0753	-0.451192	chr2R	8087544	8087619	76	-	4708	5040	2766	4491	0.5781	0.6177	0.4594	0.4317
RpS11	intronretention_Junction_31947	intronretentionright-Junction_31947	J002	0.00756088	24.1959	8.70168e-07	5.46467e-05	23.7594	24.8585	0.452516	chr2R	8087572	8087693	122	-	3436	3119	3255	5911	0.4219	0.3823	0.5406	0.5683	-0.127079
ClC-b	intronretention_Junction_32391	intronretentionleft-Junction_32391	J001	0.0117904	8.54838	0.0034583	0.0430091	14.6487	13.7905	-0.365218	chr2R	8462482	8462545	64	+	345	271	131	152	0.7248	0.7425	0.5721	0.6414
ClC-b	intronretention_Junction_32391	intronretentionleft-Junction_32391	J002	0.0118434	8.52516	0.0035027	0.0433246	11.2872	12.3729	0.47804	chr2R	8462409	8462530	122	+	131	94	98	85	0.2752	0.2575	0.4279	0.3586
ClC-b	intronretention_Junction_32391	intronretentionright-Junction_32391	J001	0.0097197	10.9553	0.000933387	0.0162855	14.6789	13.7575	-0.39208	chr2R	8462482	8462545	64	+	345	271	131	152	0.6673	0.7021	0.5198	0.5672
ClC-b	intronretention_Junction_32391	intronretentionright-Junction_32391	J002	0.00974531	10.9382	0.000942008	0.0164057	12.106	13.1907	0.470783	chr2R	8462498	8462615	118	+	172	115	121	116	0.3327	0.2979	0.4802	0.4328	-0.146055
CR30055	intronretention_Junction_32411	intronretentionleft-Junction_32411	J001	0.00652225	7.05305	0.00791306	0.0766183	12.732	11.9793	-0.328219	chr2R	8477844	8477942	99	+	157	144	74	119	0.5627	0.5878	0.4568	0.4612
CR30055	intronretention_Junction_32411	intronretentionleft-Junction_32411	J002	0.00652685	7.05093	0.00792242	0.0766507	11.7358	12.5163	0.341691	chr2R	8477773	8477892	120	+	122	101	88	139	0.4373	0.4122	0.5432	0.5388
CR30055	intronretention_Junction_32411	intronretentionright-Junction_32411	J001	0.123196	12.6149	0.000382683	0.00830734	13.9889	10.7526	-1.41386	chr2R	8477844	8477942	99	+	157	144	74	119	0.797	0.8471	0.2902	0.536
CR30055	intronretention_Junction_32411	intronretentionright-Junction_32411	J002	0.12328	12.6071	0.00038429	0.00832066	9.04709	12.303	1.47792	chr2R	8477895	8478014	120	+	40	26	181	103	0.203	0.1529	0.7098	0.464	-0.239072
ZnT49B	intronretention_Junction_32527	intronretentionleft-Junction_32527	J001	0.0180191	5.61041	0.0178541	0.132738	14.6246	13.9151	-0.301746	chr2R	8542728	8542787	60	+	272	191	194	189	0.8662	0.8414	0.7951	0.7354
ZnT49B	intronretention_Junction_32527	intronretentionleft-Junction_32527	J002	0.0182392	5.56908	0.0182804	0.13499	8.86835	9.97645	0.522435	chr2R	8542662	8542776	115	+	42	36	50	68	0.1338	0.1586	0.2049	0.2646
ZnT49B	intronretention_Junction_32527	intronretentionright-Junction_32527	J001	0.0151467	10.5948	0.00113409	0.0188398	14.811	13.727	-0.461061	chr2R	8542728	8542787	60	+	272	191	194	189	0.5075	0.5473	0.4017	0.3369
ZnT49B	intronretention_Junction_32527	intronretentionright-Junction_32527	J002	0.015137	10.6	0.00113087	0.0188019	14.4808	15.5205	0.439377	chr2R	8542740	8542861	122	+	264	158	289	372	0.4925	0.4527	0.5983	0.6631	-0.151119
ox	intronretention_Junction_32600	intronretentionleft-Junction_32600	J001	0.0364261	36.5115	1.51765e-09	2.09587e-07	23.5598	20.6409	-1.20396	chr2R	8644736	8644801	66	-	2873	2991	1042	1836	0.869	0.8923	0.521	0.6346
ox	intronretention_Junction_32600	intronretentionleft-Junction_32600	J002	0.0364384	36.4996	1.527e-09	2.10367e-07	16.5653	19.5471	1.24008	chr2R	8644665	8644784	120	-	433	361	958	1057	0.131	0.1077	0.479	0.3654
ox	intronretention_Junction_32600	intronretentionright-Junction_32600	J001	0.0516454	4.54876	0.0329426	0.197631	22.7179	21.4808	-0.510219	chr2R	8644736	8644801	66	-	2873	2991	1042	1836	0.7028	0.7654	0.5123	0.6456
ox	intronretention_Junction_32600	intronretentionright-Junction_32600	J002	0.051654	4.54801	0.032957	0.197676	19.1428	20.387	0.514956	chr2R	8644754	8644875	122	-	1215	917	992	1008	0.2972	0.2346	0.4877	0.3544	-0.2586
CG6145	intronretention_Junction_33200	intronretentionleft-Junction_33200	J001	0.0752155	7.03657	0.0079862	0.0770874	7.42511	9.16013	0.863316	chr2R	9426360	9426475	116	-	11	17	34	128	0.3667	0.6296	0.7556	0.8153
CG6145	intronretention_Junction_33200	intronretentionleft-Junction_33200	J002	0.0772365	6.91615	0.00854208	0.0807072	7.465	5.48947	-1.12319	chr2R	9426295	9426408	114	-	19	10	11	29	0.6333	0.3704	0.2444	0.1847
CG6145	intronretention_Junction_33200	intronretentionright-Junction_33200	J001	0.0177267	6.14157	0.013204	0.10829	7.7288	8.87822	0.570836	chr2R	9426360	9426475	116	-	11	17	34	128	0.3667	0.4857	0.6415	0.6368
CG6145	intronretention_Junction_33200	intronretentionright-Junction_33200	J002	0.0179353	6.11929	0.0133715	0.109007	8.52092	7.28564	-0.627909	chr2R	9426428	9426536	109	-	19	18	19	73	0.6333	0.5143	0.3585	0.3632	0.242752
shot	intronretention_Junction_33478	intronretentionleft-Junction_33478	J001	0.0307191	9.93329	0.00162316	0.0245881	9.90548	11.5115	0.726224	chr2R	9753000	9753260	261	-	99	70	0	139	0.476	0.5556	INF	0.7722
shot	intronretention_Junction_33478	intronretentionleft-Junction_33478	J002	0.0309407	9.88198	0.00166905	0.0251095	9.80561	7.90666	-0.918626	chr2R	9752952	9753048	97	-	109	56	0	41	0.524	0.4444	INF	0.2278
shot	intronretention_Junction_33478	intronretentionright-Junction_33478	J001	0.0163527	4.00167	0.0454551	0.24191	10.3379	11.1508	0.366936	chr2R	9753000	9753260	261	-	99	70	0	139	0.5	0.5303	INF	0.6526
shot	intronretention_Junction_33478	intronretentionright-Junction_33478	J002	0.0164448	3.98778	0.0458314	0.243064	10.1774	9.24734	-0.433649	chr2R	9753213	9753323	111	-	99	62	0	74	0.5	0.4697	INF	0.3474	0.199836
CG40191	intronretention_Junction_34297	intronretentionleft-Junction_34297	J001	0.0412116	4.36908	0.0365967	0.21116	11.8593	10.73	-0.502979	chr2RHet	391474	391802	329	+	82	88	69	109	0.5942	0.6769	0.4035	0.5266
CG40191	intronretention_Junction_34297	intronretentionleft-Junction_34297	J002	0.0412415	4.36673	0.0366473	0.211336	10.0588	11.2258	0.528402	chr2RHet	391403	391522	120	+	56	42	102	98	0.4058	0.3231	0.5965	0.4734
CG40191	intronretention_Junction_34297	intronretentionright-Junction_34297	J001	0.0335344	5.26121	0.0218059	0.150405	11.8467	10.7422	-0.491948	chr2RHet	391474	391802	329	+	82	88	69	109	0.5857	0.7154	0.4964	0.4619
CG40191	intronretention_Junction_34297	intronretentionright-Junction_34297	J002	0.033588	5.25531	0.0218799	0.150751	9.87012	11.0363	0.530878	chr2RHet	391755	391875	121	+	58	35	70	127	0.4143	0.2846	0.5036	0.5381	-0.169523
CG9205	intronretention_Junction_34852	intronretentionleft-Junction_34852	J001	0.0192224	14.1431	0.000169418	0.00438801	15.0611	13.5993	-0.621451	chr3L	1035956	1036030	75	+	427	360	67	181	0.5412	0.6091	0.4036	0.3448
CG9205	intronretention_Junction_34852	intronretentionleft-Junction_34852	J002	0.0192227	14.1429	0.000169435	0.00438801	14.0686	15.5003	0.60615	chr3L	1035886	1036004	119	+	362	231	99	344	0.4588	0.3909	0.5964	0.6552
CG9205	intronretention_Junction_34852	intronretentionright-Junction_34852	J001	0.00806714	36.6618	1.40509e-09	1.94988e-07	15.1219	13.5773	-0.656546	chr3L	1035956	1036030	75	+	427	360	67	181	0.7806	0.7982	0.5877	0.5403
CG9205	intronretention_Junction_34852	intronretentionright-Junction_34852	J002	0.00811646	36.5401	1.49557e-09	2.0704e-07	10.7371	12.8613	0.936702	chr3L	1035983	1036090	108	+	120	91	47	154	0.2194	0.2018	0.4123	0.4597	-0.208242
A2bp1	intronretention_Junction_35062	intronretentionleft-Junction_35062	J001	0.0410037	6.94068	0.0084257	0.0799262	14.3417	13.0322	-0.560519	chr3L	10583490	10583619	130	+	281	254	67	184	0.5091	0.5462	0.268	0.3957
A2bp1	intronretention_Junction_35062	intronretentionleft-Junction_35062	J002	0.0409853	6.94334	0.00841319	0.0798475	13.9709	15.2538	0.543938	chr3L	10583425	10583538	114	+	271	211	183	281	0.4909	0.4538	0.732	0.6043
A2bp1	intronretention_Junction_35062	intronretentionright-Junction_35062	J001	0.0119609	4.70085	0.0301478	0.185922	14.0427	13.3724	-0.286777	chr3L	10583490	10583619	130	+	281	254	67	184	0.4645	0.5121	0.3583	0.4098
A2bp1	intronretention_Junction_35062	intronretentionright-Junction_35062	J002	0.0119524	4.70296	0.0301107	0.185774	14.2149	14.8437	0.266786	chr3L	10583572	10583681	110	+	324	242	120	265	0.5355	0.4879	0.6417	0.5902	-0.123452
CG32068	intronretention_Junction_35112	intronretentionleft-Junction_35112	J001	0.0278706	4.47317	0.034431	0.203293	13.4138	12.5237	-0.384467	chr3L	10656668	10656748	81	+	110	125	135	222	0.7692	0.8065	0.6193	0.7115
CG32068	intronretention_Junction_35112	intronretentionleft-Junction_35112	J002	0.0280271	4.4568	0.0347626	0.204348	9.14991	10.2684	0.521679	chr3L	10656601	10656716	116	+	33	30	83	90	0.2308	0.1935	0.3807	0.2885
CG32068	intronretention_Junction_35112	intronretentionright-Junction_35112	J001	0.0232732	4.45953	0.034707	0.204148	13.4232	12.5143	-0.392603	chr3L	10656668	10656748	81	+	110	125	135	222	0.4453	0.5144	0.3184	0.3915
CG32068	intronretention_Junction_35112	intronretentionright-Junction_35112	J002	0.0232434	4.46394	0.0346175	0.203937	13.6724	14.5317	0.366085	chr3L	10656701	10656816	116	+	137	118	289	345	0.5547	0.4856	0.6816	0.6085	-0.12328
Atg12	intronretention_Junction_36031	intronretentionleft-Junction_36031	J001	0.0156462	12.5387	0.000398603	0.00853889	15.0661	13.8823	-0.502514	chr3L	12130395	12130451	57	+	463	353	70	191	0.546	0.6139	0.3825	0.4134
Atg12	intronretention_Junction_36031	intronretentionleft-Junction_36031	J002	0.0156492	12.537	0.00039898	0.00854053	14.0318	15.2062	0.497895	chr3L	12130323	12130443	121	+	385	222	113	271	0.454	0.3861	0.6175	0.5866
Atg12	intronretention_Junction_36031	intronretentionright-Junction_36031	J001	0.0641848	3.87714	0.0489477	0.252468	15.01	13.893	-0.474252	chr3L	12130395	12130451	57	+	463	353	70	191	0.5565	0.6698	0.359	0.5
Atg12	intronretention_Junction_36031	intronretentionright-Junction_36031	J002	0.0642065	3.87598	0.0489817	0.252517	13.5732	14.6943	0.477482	chr3L	12130404	12130521	118	+	369	174	125	191	0.4435	0.3302	0.641	0.5	-0.165985
CG32103	intronretention_Junction_36245	intronretentionleft-Junction_36245	J001	0.0476843	5.73113	0.0166668	0.126607	12.186	10.8654	-0.58522	chr3L	12398036	12398100	65	-	76	88	88	122	0.8	0.7857	0.6875	0.5398
CG32103	intronretention_Junction_36245	intronretentionleft-Junction_36245	J002	0.0479468	5.70765	0.0168912	0.127698	8.01432	9.54378	0.741959	chr3L	12397963	12398084	122	-	19	24	40	104	0.2	0.2143	0.3125	0.4602
CG32103	intronretention_Junction_36245	intronretentionright-Junction_36245	J001	0.041128	9.81294	0.00173288	0.025851	12.3554	10.7001	-0.733706	chr3L	12398036	12398100	65	-	76	88	88	122	0.7451	0.704	0.5466	0.4136
CG32103	intronretention_Junction_36245	intronretentionright-Junction_36245	J002	0.0411809	9.80343	0.00174187	0.0259579	9.30639	11.0801	0.814481	chr3L	12398053	12398173	121	-	26	37	73	173	0.2549	0.296	0.4534	0.5864	-0.237564
tral	intronretention_Junction_36346	intronretentionleft-Junction_36346	J001	0.0269925	5.54288	0.018556	0.136146	12.1936	11.1557	-0.458435	chr3L	12512170	12512242	73	+	147	159	40	87	0.6025	0.6463	0.396	0.5179
tral	intronretention_Junction_36346	intronretentionleft-Junction_36346	J002	0.0270475	5.53552	0.0186342	0.13654	10.5253	11.6094	0.485465	chr3L	12512103	12512218	116	+	97	87	61	81	0.3975	0.3537	0.604	0.4821
tral	intronretention_Junction_36346	intronretentionright-Junction_36346	J001	0.200123	4.46264	0.0346439	0.203965	12.9283	10.4171	-1.11075	chr3L	12512170	12512242	73	+	147	159	40	87	0.5194	0.631	0.1389	0.3973
tral	intronretention_Junction_36346	intronretentionright-Junction_36346	J002	0.199946	4.46639	0.0345679	0.203751	11.9134	14.4408	1.08955	chr3L	12512195	12512312	118	+	136	93	248	132	0.4806	0.369	0.8611	0.6027	-0.225628
CG32333	intronretention_Junction_36658	intronretentionleft-Junction_36658	J001	0.00872632	41.9691	9.27289e-11	1.81306e-08	14.5451	12.7468	-0.770244	chr3L	1294038	1294091	54	+	465	232	32	158	0.722	0.7412	0.4051	0.4647
CG32333	intronretention_Junction_36658	intronretentionleft-Junction_36658	J002	0.00876155	41.8817	9.69657e-11	1.8894e-08	11.2692	13.3799	0.921622	chr3L	1293966	1294086	121	+	179	81	47	182	0.278	0.2588	0.5949	0.5353
CG32333	intronretention_Junction_36658	intronretentionright-Junction_36658	J001	0.0488586	4.10736	0.0426969	0.232761	14.1504	13.0001	-0.492963	chr3L	1294038	1294091	54	+	465	232	32	158	0.7143	0.8084	0.6667	0.5704
CG32333	intronretention_Junction_36658	intronretentionright-Junction_36658	J002	0.0490114	4.09637	0.0429754	0.233857	10.605	11.8365	0.549473	chr3L	1294044	1294165	122	+	186	55	16	119	0.2857	0.1916	0.3333	0.4296	-0.254804
CG11267	intronretention_Junction_36689	intronretentionleft-Junction_36689	J001	0.0528337	6.43878	0.0111655	0.0969773	17.7629	16.3908	-0.57262	chr3L	13009618	13009685	68	+	886	745	164	438	0.5426	0.6245	0.31	0.4415
CG11267	intronretention_Junction_36689	intronretentionleft-Junction_36689	J002	0.0528349	6.43864	0.0111664	0.0969773	16.6451	18.015	0.571077	chr3L	13009546	13009666	121	+	747	448	365	554	0.4574	0.3755	0.69	0.5585
CG11267	intronretention_Junction_36689	intronretentionright-Junction_36689	J001	0.00632933	4.32582	0.0375384	0.214548	17.3276	16.8801	-0.186706	chr3L	13009618	13009685	68	+	886	745	164	438	0.6496	0.6785	0.5795	0.6083
CG11267	intronretention_Junction_36689	intronretentionright-Junction_36689	J002	0.00633696	4.3226	0.0376095	0.214803	14.9961	15.5176	0.219901	chr3L	13009638	13009752	115	+	478	353	119	282	0.3504	0.3215	0.4205	0.3917	-0.152355
stv	intronretention_Junction_36939	intronretentionleft-Junction_36939	J001	0.0112981	8.16665	0.00426675	0.0499107	9.21502	7.81062	-0.69014	chr3L	13473702	13474131	430	+	67	58	18	22	0.3102	0.3473	0.1875	0.1947
stv	intronretention_Junction_36939	intronretentionleft-Junction_36939	J002	0.0111295	8.21036	0.00416518	0.0491233	11.4896	12.306	0.358965	chr3L	13473637	13473750	114	+	149	109	78	91	0.6898	0.6527	0.8125	0.8053
stv	intronretention_Junction_36939	intronretentionright-Junction_36939	J001	0.0270474	4.48825	0.0341285	0.202125	9.10687	7.91981	-0.58308	chr3L	13473702	13474131	430	+	67	58	18	22	0.482	0.4203	0.24	0.3548
stv	intronretention_Junction_36939	intronretentionright-Junction_36939	J002	0.0268285	4.50807	0.0337353	0.2006	9.7248	10.7102	0.451751	chr3L	13474084	13474184	101	+	72	80	57	40	0.518	0.5797	0.76	0.6452	-0.103009
nSyb	intronretention_Junction_39039	intronretentionleft-Junction_39039	J001	0.0108112	13.4877	0.000240138	0.00582897	19.6669	18.7309	-0.387903	chr3L	1635459	1635532	74	-	1441	1050	341	1010	0.6062	0.6148	0.4361	0.4975
nSyb	intronretention_Junction_39039	intronretentionleft-Junction_39039	J002	0.0108129	13.4858	0.000240374	0.00583222	18.1106	19.0626	0.395121	chr3L	1635386	1635507	122	-	936	658	441	1020	0.3938	0.3852	0.5639	0.5025
nSyb	intronretention_Junction_39039	intronretentionright-Junction_39039	J001	0.0206926	3.90093	0.0482593	0.250559	19.6059	18.7785	-0.342845	chr3L	1635459	1635532	74	-	1441	1050	341	1010	0.8137	0.8184	0.7821	0.7063
nSyb	intronretention_Junction_39039	intronretentionright-Junction_39039	J002	0.020723	3.89549	0.0484159	0.250977	14.4717	15.3877	0.38728	chr3L	1635485	1635606	122	-	330	233	95	420	0.1863	0.1816	0.2179	0.2937	-0.136106
TMS1	intronretention_Junction_39137	intronretentionleft-Junction_39137	J001	0.0244655	7.29155	0.00692797	0.0699326	19.5543	18.4482	-0.458584	chr3L	16407078	16407136	59	+	942	835	714	848	0.6165	0.6734	0.4542	0.5364
TMS1	intronretention_Junction_39137	intronretentionleft-Junction_39137	J002	0.0244686	7.29068	0.00693131	0.0699487	17.4951	18.6146	0.465427	chr3L	16407007	16407126	120	+	586	405	858	733	0.3835	0.3266	0.5458	0.4636
TMS1	intronretention_Junction_39137	intronretentionright-Junction_39137	J001	0.0346724	9.99736	0.00156765	0.0239963	19.7813	18.223	-0.646082	chr3L	16407078	16407136	59	+	942	835	714	848	0.7072	0.7422	0.4685	0.586
TMS1	intronretention_Junction_39137	intronretentionright-Junction_39137	J002	0.0346806	9.99509	0.00156958	0.0240131	16.4275	18.012	0.66091	chr3L	16407089	16407209	121	+	390	290	810	599	0.2928	0.2578	0.5315	0.414	-0.174075
Su(P)	intronretention_Junction_39356	intronretentionleft-Junction_39356	J001	0.019876	31.1882	2.34184e-08	2.38361e-06	17.7162	15.6203	-0.876504	chr3L	16603929	16603990	62	-	574	507	361	286	0.7694	0.7959	0.4738	0.5586
Su(P)	intronretention_Junction_39356	intronretentionleft-Junction_39356	J002	0.0198933	31.165	2.36999e-08	2.40795e-06	13.3367	15.6011	0.961745	chr3L	16603858	16603977	120	-	172	130	401	226	0.2306	0.2041	0.5262	0.4414
Su(P)	intronretention_Junction_39356	intronretentionright-Junction_39356	J001	0.0110619	27.0513	1.98131e-07	1.47941e-05	17.3945	15.9227	-0.615445	chr3L	16603929	16603990	62	-	574	507	361	286	0.6106	0.6706	0.4252	0.4327
Su(P)	intronretention_Junction_39356	intronretentionright-Junction_39356	J002	0.011064	27.047	1.98563e-07	1.48069e-05	15.4251	16.9323	0.631877	chr3L	16603943	16604061	119	-	366	249	488	375	0.3894	0.3294	0.5748	0.5673	-0.238593
TSG101	intronretention_Junction_39550	intronretentionleft-Junction_39550	J001	0.0336175	4.42701	0.0353745	0.206685	12.3887	13.3325	0.408305	chr3L	16836132	16836201	70	+	130	95	147	202	0.5702	0.546	0.7577	0.6495
TSG101	intronretention_Junction_39550	intronretentionleft-Junction_39550	J002	0.033726	4.41664	0.03559	0.207391	11.6097	10.5788	-0.461281	chr3L	16836066	16836180	115	+	98	79	47	109	0.4298	0.454	0.2423	0.3505
TSG101	intronretention_Junction_39550	intronretentionright-Junction_39550	J001	0.00772893	19.4429	1.03651e-05	0.000438798	12.3206	13.4025	0.468035	chr3L	16836132	16836201	70	+	130	95	147	202	0.625	0.6169	0.8077	0.7953
TSG101	intronretention_Junction_39550	intronretentionright-Junction_39550	J002	0.00781374	19.3627	1.081e-05	0.00045125	10.71	8.93073	-0.827335	chr3L	16836154	16836267	114	+	78	59	35	52	0.375	0.3831	0.1923	0.2047	0.182917
scaf6	intronretention_Junction_39689	intronretentionleft-Junction_39689	J001	0.0678224	6.75131	0.00936791	0.0861215	13.4999	12.0036	-0.648567	chr3L	17030973	17031029	57	-	188	162	57	164	0.821	0.8901	0.5938	0.7289
scaf6	intronretention_Junction_39689	intronretentionleft-Junction_39689	J002	0.0683478	6.71218	0.00957566	0.0876051	7.9385	9.6189	0.815456	chr3L	17030909	17031021	113	-	41	20	39	61	0.179	0.1099	0.4062	0.2711
scaf6	intronretention_Junction_39689	intronretentionright-Junction_39689	J001	0.0471498	5.78625	0.016152	0.124055	13.3361	12.1733	-0.503886	chr3L	17030973	17031029	57	-	188	162	57	164	0.8704	0.81	0.6264	0.7387
scaf6	intronretention_Junction_39689	intronretentionright-Junction_39689	J002	0.0475941	5.74886	0.0164993	0.125789	8.09391	9.49739	0.680143	chr3L	17030982	17031102	121	-	28	38	34	58	0.1296	0.19	0.3736	0.2613	-0.224957
drpr	intronretention_Junction_39792	intronretentionleft-Junction_39792	J001	0.027309	34.5436	4.16818e-09	5.22373e-07	7.1316	2.40547	-3.55961	chr3L	1716556	1716673	118	-	44	37	0	2	0.6984	0.6981	INF	0.0556
drpr	intronretention_Junction_39792	intronretentionleft-Junction_39792	J002	0.0277644	34.3644	4.57013e-09	5.66005e-07	5.0816	8.02436	1.67333	chr3L	1716509	1716604	96	-	19	16	0	34	0.3016	0.3019	INF	0.9444
drpr	intronretention_Junction_39792	intronretentionright-Junction_39792	J001	0.0281814	39.9857	2.55831e-10	4.50651e-08	7.37837	2.30243	-3.82144	chr3L	1716556	1716673	118	-	44	37	0	2	0.6984	0.7115	INF	0.0465
drpr	intronretention_Junction_39792	intronretentionright-Junction_39792	J002	0.0284817	39.8416	2.75415e-10	4.77993e-08	5.21526	8.28111	1.71391	chr3L	1716626	1716708	83	-	19	15	0	41	0.3016	0.2885	INF	0.9535	-0.514377
CG12024	intronretention_Junction_40563	intronretentionleft-Junction_40563	J001	0.0446361	5.58421	0.0181231	0.134212	10.6644	9.42523	-0.57135	chr3L	1857403	1857463	61	+	106	91	21	51	0.5856	0.7054	0.3818	0.4766
CG12024	intronretention_Junction_40563	intronretentionleft-Junction_40563	J002	0.044763	5.5741	0.018228	0.134708	8.89966	10.1798	0.600923	chr3L	1857337	1857451	115	+	75	38	34	56	0.4144	0.2946	0.6182	0.5234
CG12024	intronretention_Junction_40563	intronretentionright-Junction_40563	J001	0.0226286	6.89324	0.00865221	0.0813963	10.5946	9.51561	-0.497272	chr3L	1857403	1857463	61	+	106	91	21	51	0.6974	0.728	0.4468	0.5795
CG12024	intronretention_Junction_40563	intronretentionright-Junction_40563	J002	0.0229231	6.85402	0.00884422	0.0826153	7.86046	9.17102	0.643808	chr3L	1857416	1857536	121	+	46	34	26	37	0.3026	0.272	0.5532	0.4205	-0.205908
RhoBTB	intronretention_Junction_42180	intronretentionleft-Junction_42180	J001	0.0222835	3.93877	0.0471852	0.247412	12.2643	11.475	-0.347257	chr3L	20373448	20373511	64	+	121	151	60	98	0.761	0.755	0.7059	0.5939
RhoBTB	intronretention_Junction_42180	intronretentionleft-Junction_42180	J002	0.022544	3.90867	0.0480377	0.249892	8.65804	9.69323	0.49295	chr3L	20373377	20373496	120	+	38	49	25	67	0.239	0.245	0.2941	0.4061
RhoBTB	intronretention_Junction_42180	intronretentionright-Junction_42180	J001	0.0139889	3.99457	0.0456472	0.242637	12.193	11.5447	-0.28517	chr3L	20373448	20373511	64	+	121	151	60	98	0.7202	0.7784	0.6452	0.649
RhoBTB	intronretention_Junction_42180	intronretentionright-Junction_42180	J002	0.0141681	3.97087	0.0462937	0.244589	8.67877	9.61832	0.44787	chr3L	20373464	20373583	120	+	47	43	33	53	0.2798	0.2216	0.3548	0.351	-0.125381
Psn	intronretention_Junction_42258	intronretentionleft-Junction_42258	J001	0.0173347	6.30192	0.0120607	0.101692	11.379	12.2656	0.390378	chr3L	20427402	20427646	245	+	66	110	94	141	0.5	0.5556	0.6395	0.7085
Psn	intronretention_Junction_42258	intronretentionleft-Junction_42258	J002	0.0174122	6.28567	0.0121718	0.102464	10.9304	9.89974	-0.469655	chr3L	20427332	20427450	119	+	66	88	53	58	0.5	0.4444	0.3605	0.2915
Psn	intronretention_Junction_42258	intronretentionright-Junction_42258	J001	0.0682996	3.88262	0.0487884	0.251984	11.2588	12.4069	0.505542	chr3L	20427402	20427646	245	+	66	110	94	141	0.4962	0.6707	0.7966	0.7306
Psn	intronretention_Junction_42258	intronretentionright-Junction_42258	J002	0.0686246	3.86812	0.0492116	0.252981	9.99255	8.75873	-0.582883	chr3L	20427599	20427705	107	+	67	54	24	52	0.5038	0.3293	0.2034	0.2694	0.171647
CG10508	intronretention_Junction_42890	intronretentionleft-Junction_42890	J001	0.00901254	8.78963	0.00302947	0.0388741	11.0115	11.8792	0.385088	chr3L	21206057	21206227	171	+	77	83	70	140	0.5461	0.5724	0.7143	0.7071
CG10508	intronretention_Junction_42890	intronretentionleft-Junction_42890	J002	0.00908631	8.7627	0.00307454	0.0393572	10.2443	9.071	-0.548303	chr3L	21205996	21206105	110	+	64	62	28	58	0.4539	0.4276	0.2857	0.2929
CG10508	intronretention_Junction_42890	intronretentionright-Junction_42890	J001	0.0237607	11.5225	0.000687589	0.0128029	10.8324	12.0476	0.539495	chr3L	21206057	21206227	171	+	77	83	70	140	0.621	0.7034	0.875	0.8333
CG10508	intronretention_Junction_42890	intronretentionright-Junction_42890	J002	0.0244024	11.3723	0.00074549	0.0136826	8.7366	6.88866	-0.94628	chr3L	21206180	21206293	114	+	47	35	10	28	0.379	0.2966	0.125	0.1667	0.198466
CG9391	intronretention_Junction_42949	intronretentionleft-Junction_42949	J001	0.00941589	27.0978	1.93421e-07	1.45186e-05	17.54	16.333	-0.504036	chr3L	21260635	21260685	51	-	655	595	244	455	0.8653	0.8598	0.6912	0.7398
CG9391	intronretention_Junction_42949	intronretentionleft-Junction_42949	J002	0.00946562	27.0091	2.02497e-07	1.50607e-05	11.3254	13.1401	0.793432	chr3L	21260565	21260683	119	-	102	97	109	160	0.1347	0.1402	0.3088	0.2602
CG9391	intronretention_Junction_42949	intronretentionright-Junction_42949	J001	0.0288314	5.41647	0.0199476	0.142823	17.4341	16.4274	-0.420404	chr3L	21260635	21260685	51	-	655	595	244	455	0.8851	0.8763	0.8356	0.7621
CG9391	intronretention_Junction_42949	intronretentionright-Junction_42949	J002	0.0290122	5.38738	0.0202829	0.144092	10.7067	11.9436	0.550542	chr3L	21260638	21260753	116	-	85	84	48	142	0.1149	0.1237	0.1644	0.2379	-0.167563
CG11307	intronretention_Junction_43309	intronretentionleft-Junction_43309	J001	0.0471513	13.461	0.000243577	0.00588733	10.4814	8.36408	-0.999981	chr3L	21612717	21612772	56	+	129	88	0	46	0.8776	0.8148	INF	0.5055
CG11307	intronretention_Junction_43309	intronretentionleft-Junction_43309	J002	0.0489661	13.1223	0.0002918	0.00680153	5.62272	8.29819	1.46388	chr3L	21612655	21612765	111	+	18	20	0	45	0.1224	0.1852	INF	0.4945
CG11307	intronretention_Junction_43309	intronretentionright-Junction_43309	J001	0.0128743	8.4092	0.00373328	0.0454163	10.1648	8.80184	-0.641282	chr3L	21612717	21612772	56	+	129	88	0	46	0.4725	0.4583	INF	0.2805
CG11307	intronretention_Junction_43309	intronretentionright-Junction_43309	J002	0.0127967	8.43575	0.00367916	0.0448923	10.5904	11.6603	0.478399	chr3L	21612725	21612846	122	+	144	104	0	118	0.5275	0.5417	INF	0.7195	-0.209101
Adhr	intronretention_Junction_4357	intronretentionleft-Junction_4357	J001	0.0142993	19.409	1.05511e-05	0.000444179	21.2563	19.6715	-0.655078	chr2L	14615643	14616301	659	+	665	933	25	4722	0.7688	0.8078	0.625	0.5991
Adhr	intronretention_Junction_4357	intronretentionleft-Junction_4357	J002	0.0143049	19.4024	1.05871e-05	0.000444887	16.5937	18.2815	0.703373	chr2L	14615570	14615691	122	+	200	222	15	3160	0.2312	0.1922	0.375	0.4009
Adhr	intronretention_Junction_4357	intronretentionright-Junction_4357	J001	0.15264	4.75296	0.029248	0.182031	21.1437	19.7681	-0.568615	chr2L	14615643	14616301	659	+	665	933	25	4722	0.472	0.6187	0.1592	0.3638
Adhr	intronretention_Junction_4357	intronretentionright-Junction_4357	J002	0.152629	4.75326	0.0292429	0.182018	20.3966	21.7723	0.568088	chr2L	14616254	14616375	122	+	744	575	132	8257	0.528	0.3813	0.8408	0.6362	-0.257337
E(bx)	intronretention_Junction_44657	intronretentionleft-Junction_44657	J001	0.0191278	4.96363	0.0258858	0.167805	7.60246	6.12512	-0.80959	chr3L	236427	236861	435	-	69	51	0	13	0.3855	0.3469	INF	0.1912
E(bx)	intronretention_Junction_44657	intronretentionleft-Junction_44657	J002	0.0187474	5.00342	0.0252973	0.165529	9.18848	10.1218	0.436075	chr3L	236357	236475	119	-	110	96	0	55	0.6145	0.6531	INF	0.8088
E(bx)	intronretention_Junction_44657	intronretentionright-Junction_44657	J001	0.0497254	14.3501	0.000151773	0.00404281	8.0424	5.69795	-1.28972	chr3L	236427	236861	435	-	69	51	0	13	0.8519	0.7727	INF	0.3514
E(bx)	intronretention_Junction_44657	intronretentionright-Junction_44657	J002	0.0527383	13.9183	0.000190935	0.0048455	4.42941	7.19704	1.70029	chr3L	236814	236904	91	-	12	15	0	24	0.1481	0.2273	INF	0.6486	-0.196731
CG1317	intronretention_Junction_44674	intronretentionleft-Junction_44674	J001	0.00552224	18.6269	1.58958e-05	0.00062807	16.3757	15.4386	-0.393436	chr3L	2368425	2368628	204	-	435	438	149	409	0.6601	0.6909	0.5321	0.536
CG1317	intronretention_Junction_44674	intronretentionleft-Junction_44674	J002	0.00553052	18.6104	1.60343e-05	0.000631789	13.8634	14.9679	0.46913	chr3L	2368354	2368473	120	-	224	196	131	354	0.3399	0.3091	0.4679	0.464
CG1317	intronretention_Junction_44674	intronretentionright-Junction_44674	J001	0.00620319	6.02849	0.0140768	0.113125	16.1846	15.624	-0.235369	chr3L	2368425	2368628	204	-	435	438	149	409	0.5816	0.6169	0.5034	0.5223
CG1317	intronretention_Junction_44674	intronretentionright-Junction_44674	J002	0.00620753	6.02587	0.0140977	0.113245	14.7989	15.4043	0.255602	chr3L	2368581	2368699	119	-	313	272	147	374	0.4184	0.3831	0.4966	0.4777	-0.111155
CG17698	intronretention_Junction_44708	intronretentionleft-Junction_44708	J001	0.00848855	19.1749	1.19271e-05	0.000491394	16.2788	15.2098	-0.44934	chr3L	23741160	23741238	79	+	361	304	332	294	0.7023	0.7204	0.5734	0.525
CG17698	intronretention_Junction_44708	intronretentionleft-Junction_44708	J002	0.00850107	19.1562	1.20446e-05	0.000495516	13.2177	14.4808	0.53961	chr3L	23741091	23741208	118	+	153	118	247	266	0.2977	0.2796	0.4266	0.475
CG17698	intronretention_Junction_44708	intronretentionright-Junction_44708	J001	0.0180055	22.152	2.51893e-06	0.000135207	16.5647	14.9457	-0.68053	chr3L	23741160	23741238	79	+	361	304	332	294	0.6516	0.6741	0.4643	0.3843
CG17698	intronretention_Junction_44708	intronretentionright-Junction_44708	J002	0.0180076	22.1498	2.5218e-06	0.000135234	14.2587	15.9211	0.702077	chr3L	23741191	23741311	121	+	193	147	383	471	0.3484	0.3259	0.5357	0.6157	-0.207302
miple	intronretention_Junction_45284	intronretentionleft-Junction_45284	J001	0.0120999	29.4892	5.62305e-08	5.05426e-06	21.763	23.2519	0.613833	chr3L	268459	268561	103	+	1192	1167	4386	4170	0.464	0.5266	0.6896	0.7115
miple	intronretention_Junction_45284	intronretentionleft-Junction_45284	J002	0.0121015	29.4853	5.63427e-08	5.05636e-06	21.8301	20.3167	-0.62495	chr3L	268386	268507	122	+	1377	1049	1974	1691	0.536	0.4734	0.3104	0.2885
miple	intronretention_Junction_45284	intronretentionright-Junction_45284	J001	0.0217564	5.60224	0.0179375	0.133219	22.0559	22.9603	0.372877	chr3L	268459	268561	103	+	1192	1167	4386	4170	0.656	0.706	0.8051	0.753
miple	intronretention_Junction_45284	intronretentionright-Junction_45284	J002	0.0217633	5.60055	0.0179548	0.133261	19.3983	18.4666	-0.386325	chr3L	268514	268634	121	+	625	486	1062	1368	0.344	0.294	0.1949	0.247	0.181344
CG11537	intronretention_Junction_45699	intronretentionleft-Junction_45699	J001	0.0616488	9.37293	0.00220213	0.0308988	13.1194	11.2777	-0.805741	chr3L	3130178	3130237	60	-	223	138	60	87	0.8814	0.7931	0.5556	0.6591
CG11537	intronretention_Junction_45699	intronretentionleft-Junction_45699	J002	0.0621047	9.31872	0.00226824	0.0315155	7.84748	9.91852	1.00106	chr3L	3130115	3130226	112	-	30	36	48	45	0.1186	0.2069	0.4444	0.3409
CG11537	intronretention_Junction_45699	intronretentionright-Junction_45699	J001	0.0847714	12.7831	0.00034977	0.00779814	13.4875	10.9232	-1.12258	chr3L	3130178	3130237	60	-	223	138	60	87	0.7743	0.8519	0.3727	0.5577
CG11537	intronretention_Junction_45699	intronretentionright-Junction_45699	J002	0.0849833	12.7558	0.00035491	0.0078757	8.94905	11.5939	1.21343	chr3L	3130190	3130307	118	-	65	24	101	69	0.2257	0.1481	0.6273	0.4423	-0.339155
NDUFS3	intronretention_Junction_45732	intronretentionleft-Junction_45732	J001	0.00697169	7.77425	0.00529962	0.0580876	16.0855	16.7435	0.275459	chr3L	3159215	3159272	58	-	394	367	262	597	0.463	0.5097	0.5809	0.5841
NDUFS3	intronretention_Junction_45732	intronretentionleft-Junction_45732	J002	0.0069736	7.7727	0.00530417	0.0580942	16.2825	15.6002	-0.286424	chr3L	3159145	3159263	119	-	457	353	189	425	0.537	0.4903	0.4191	0.4159
NDUFS3	intronretention_Junction_45732	intronretentionright-Junction_45732	J001	0.0210128	6.44457	0.0111292	0.0968307	15.9769	16.8323	0.358149	chr3L	3159215	3159272	58	-	394	367	262	597	0.5621	0.5863	0.7443	0.6678
NDUFS3	intronretention_Junction_45732	intronretentionright-Junction_45732	J002	0.0210369	6.43863	0.0111665	0.0969773	14.9514	14.038	-0.387657	chr3L	3159225	3159344	120	-	307	259	90	297	0.4379	0.4137	0.2557	0.3322	0.110895
Utx	intronretention_Junction_459	intronretentionleft-Junction_459	J001	0.0303586	5.502	0.0189947	0.138379	8.61645	7.55171	-0.535249	chr2L	10274105	10274163	59	-	78	67	0	27	0.8211	0.859	INF	0.6279
Utx	intronretention_Junction_459	intronretentionleft-Junction_459	J002	0.0333387	5.31259	0.0211719	0.147891	4.49023	6.2042	1.10498	chr2L	10274039	10274153	115	-	17	11	0	16	0.1789	0.141	INF	0.3721
Utx	intronretention_Junction_459	intronretentionright-Junction_459	J001	0.0294007	8.09078	0.00444911	0.0512568	8.87484	7.31479	-0.784613	chr2L	10274105	10274163	59	-	78	67	0	27	0.6555	0.7204	INF	0.403
Utx	intronretention_Junction_459	intronretentionright-Junction_459	J002	0.0299842	8.00883	0.00465499	0.053141	6.69088	8.38711	0.883935	chr2L	10274116	10274235	120	-	41	26	0	40	0.3445	0.2796	INF	0.597	-0.283579
CG12006	intronretention_Junction_46300	intronretentionleft-Junction_46300	J001	0.010199	4.60498	0.0318791	0.193454	12.712	12.0359	-0.294745	chr3L	3813360	3813449	90	+	196	137	56	124	0.6068	0.6432	0.549	0.498
CG12006	intronretention_Junction_46300	intronretentionleft-Junction_46300	J002	0.0102289	4.59763	0.0320162	0.193831	11.0825	11.8443	0.337916	chr3L	3813294	3813408	115	+	127	76	46	125	0.3932	0.3568	0.451	0.502
CG12006	intronretention_Junction_46300	intronretentionright-Junction_46300	J001	0.00662304	10.5514	0.00116098	0.0191465	12.8329	11.932	-0.392676	chr3L	3813360	3813449	90	+	196	137	56	124	0.6384	0.6256	0.4828	0.4921
CG12006	intronretention_Junction_46300	intronretentionright-Junction_46300	J002	0.00664023	10.5401	0.00116814	0.0192426	11.0488	12.0775	0.455458	chr3L	3813402	3813522	121	+	111	82	60	128	0.3616	0.3744	0.5172	0.5079	-0.120714
yellow-c	intronretention_Junction_4635	intronretentionleft-Junction_4635	J001	0.0115573	11.4835	0.000702184	0.0130125	10.5103	8.24223	-1.07359	chr2L	15036991	15037049	59	+	366	425	8	3	0.4026	0.4386	0.1905	0.1667
yellow-c	intronretention_Junction_4635	intronretentionleft-Junction_4635	J002	0.0115393	11.4875	0.000700667	0.0129919	11.5193	13.0157	0.6537	chr2L	15036933	15037039	107	+	543	544	34	15	0.5974	0.5614	0.8095	0.8333
yellow-c	intronretention_Junction_4635	intronretentionright-Junction_4635	J001	0.0079473	115.466	6.22166e-27	1.36152e-23	12.5279	6.53525	-2.8674	chr2L	15036991	15037049	59	+	366	425	8	3	0.5422	0.5607	0.0696	0.0517
yellow-c	intronretention_Junction_4635	intronretentionright-Junction_4635	J002	0.0079456	115.474	6.19766e-27	1.36152e-23	11.8313	15.0067	1.36531	chr2L	15037002	15037115	114	+	309	333	107	55	0.4578	0.4393	0.9304	0.9483	-0.266063
CG10863	intronretention_Junction_46419	intronretentionleft-Junction_46419	J001	0.0176194	5.73831	0.0165987	0.126293	15.4471	14.5758	-0.368178	chr3L	3941569	3941624	56	-	321	268	68	454	0.8147	0.7592	0.701	0.6706
CG10863	intronretention_Junction_46419	intronretentionleft-Junction_46419	J002	0.0177015	5.7185	0.0167871	0.127276	11.0735	12.1713	0.485425	chr3L	3941502	3941617	116	-	73	85	29	223	0.1853	0.2408	0.299	0.3294
CG10863	intronretention_Junction_46419	intronretentionright-Junction_46419	J001	0.0151218	7.52994	0.0060682	0.0636129	15.465	14.568	-0.37899	chr3L	3941569	3941624	56	-	321	268	68	454	0.8127	0.7592	0.6733	0.6676
CG10863	intronretention_Junction_46419	intronretentionright-Junction_46419	J002	0.0151945	7.50542	0.00615136	0.0642309	11.1083	12.2663	0.511371	chr3L	3941577	3941693	117	-	74	85	33	226	0.1873	0.2408	0.3267	0.3324	-0.135962
Teh2	intronretention_Junction_46671	intronretentionleft-Junction_46671	J001	0.00917622	29.3889	5.9215e-08	5.2891e-06	14.4294	13.0546	-0.588062	chr3L	4179587	4180729	1143	-	238	237	119	158	0.7987	0.8345	0.6103	0.6008
Teh2	intronretention_Junction_46671	intronretentionleft-Junction_46671	J002	0.00925364	29.2697	6.29727e-08	5.60713e-06	9.54226	11.6387	0.9517	chr3L	4179520	4179635	116	-	60	47	76	105	0.2013	0.1655	0.3897	0.3992
Teh2	intronretention_Junction_46671	intronretentionright-Junction_46671	J001	0.00623324	18.0669	2.13282e-05	0.000803118	14.3018	13.1758	-0.481653	chr3L	4179587	4180729	1143	-	238	237	119	158	0.5277	0.5656	0.3864	0.3882
Teh2	intronretention_Junction_46671	intronretentionright-Junction_46671	J002	0.00623002	18.0719	2.12713e-05	0.000801506	13.6664	14.7296	0.452527	chr3L	4180682	4180800	119	-	213	182	189	249	0.4723	0.4344	0.6136	0.6118	-0.177924
nAChRbeta1	intronretention_Junction_46951	intronretentionleft-Junction_46951	J001	0.00616977	12.3634	0.000437843	0.00910277	15.804	15.1423	-0.278616	chr3L	4429502	4429564	63	+	328	289	241	355	0.8586	0.8475	0.7627	0.7569
nAChRbeta1	intronretention_Junction_46951	intronretentionleft-Junction_46951	J002	0.00623103	12.312	0.000450066	0.00926461	9.9664	11.299	0.603674	chr3L	4429433	4429550	118	+	54	52	75	114	0.1414	0.1525	0.2373	0.2431
nAChRbeta1	intronretention_Junction_46951	intronretentionright-Junction_46951	J001	0.0839499	10.2337	0.001379	0.0218555	16.715	14.2415	-1.04195	chr3L	4429502	4429564	63	+	328	289	241	355	0.4932	0.5568	0.1589	0.2993
nAChRbeta1	intronretention_Junction_46951	intronretentionright-Junction_46951	J002	0.0839012	10.2394	0.00137471	0.0218178	16.3919	18.8476	1.02275	chr3L	4429517	4429633	117	+	337	230	1276	831	0.5068	0.4432	0.8411	0.7007	-0.26893
Ubp64E	intronretention_Junction_47800	intronretentionleft-Junction_47800	J001	0.0097462	3.89722	0.048366	0.250832	13.5773	13.0183	-0.240357	chr3L	5753901	5753958	58	+	297	197	32	187	0.7462	0.719	0.6154	0.6561
Ubp64E	intronretention_Junction_47800	intronretentionleft-Junction_47800	J002	0.00982749	3.88252	0.0487914	0.251984	10.251	11.0463	0.359972	chr3L	5753828	5753949	122	+	101	77	20	98	0.2538	0.281	0.3846	0.3439
Ubp64E	intronretention_Junction_47800	intronretentionright-Junction_47800	J001	0.0167765	19.7845	8.66825e-06	0.00037764	13.9922	12.5592	-0.6165	chr3L	5753901	5753958	58	+	297	197	32	187	0.8071	0.8419	0.5517	0.6318
Ubp64E	intronretention_Junction_47800	intronretentionright-Junction_47800	J002	0.0169582	19.6717	9.19524e-06	0.000397857	9.07057	11.0461	0.911437	chr3L	5753911	5754030	120	+	71	37	26	109	0.1929	0.1581	0.4483	0.3682	-0.190914
dikar	intronretention_Junction_48907	intronretentionleft-Junction_48907	J001	0.0144663	14.0473	0.000178272	0.00456694	9.75141	8.03227	-0.829912	chr3L	6731198	6731802	605	-	84	64	15	29	0.4884	0.5203	0.2273	0.3021
dikar	intronretention_Junction_48907	intronretentionleft-Junction_48907	J002	0.0143692	14.0843	0.000174796	0.00449814	9.72298	11.0865	0.621725	chr3L	6731130	6731246	117	-	88	59	51	67	0.5116	0.4797	0.7727	0.6979
dikar	intronretention_Junction_48907	intronretentionright-Junction_48907	J001	0.014759	19.9156	8.0936e-06	0.00035736	9.87525	7.91817	-0.945091	chr3L	6731198	6731802	605	-	84	64	15	29	0.6222	0.6154	0.2679	0.3537
dikar	intronretention_Junction_48907	intronretentionright-Junction_48907	J002	0.0147587	19.9158	8.09307e-06	0.00035736	8.40778	10.2346	0.865804	chr3L	6731755	6731864	110	-	51	40	41	53	0.3778	0.3846	0.7321	0.6463	-0.217251
akirin	intronretention_Junction_49489	intronretentionleft-Junction_49489	J001	0.00750397	33.0885	8.80576e-09	1.00607e-06	15.8126	14.4131	-0.590939	chr3L	7365619	7365679	61	+	363	363	132	285	0.7118	0.7469	0.5057	0.5278
akirin	intronretention_Junction_49489	intronretentionleft-Junction_49489	J002	0.00752163	33.0425	9.01682e-09	1.02401e-06	12.4506	14.1506	0.731236	chr3L	7365547	7365667	121	+	147	123	129	255	0.2882	0.2531	0.4943	0.4722
akirin	intronretention_Junction_49489	intronretentionright-Junction_49489	J001	0.0192133	26.8496	2.19925e-07	1.61877e-05	15.9262	14.2801	-0.695163	chr3L	7365619	7365679	61	+	363	363	132	285	0.9144	0.8875	0.6839	0.7422
akirin	intronretention_Junction_49489	intronretentionright-Junction_49489	J002	0.019396	26.6905	2.38791e-07	1.73076e-05	8.72628	11.171	1.13312	chr3L	7365632	7365751	120	+	34	46	61	99	0.0856	0.1125	0.3161	0.2578	-0.246831
GstO2	intronretention_Junction_50595	intronretentionleft-Junction_50595	J001	0.0279127	4.2141	0.0400893	0.223821	15.1503	14.4093	-0.31368	chr3L	8516321	8516499	179	-	263	376	172	198	0.9007	0.94	0.8687	0.8571
GstO2	intronretention_Junction_50595	intronretentionleft-Junction_50595	J002	0.0285493	4.15775	0.0414444	0.22876	7.21518	8.46185	0.636257	chr3L	8516260	8516369	110	-	29	24	26	33	0.0993	0.06	0.1313	0.1429
GstO2	intronretention_Junction_50595	intronretentionright-Junction_50595	J001	0.010344	7.05471	0.00790572	0.0765767	15.0725	14.4643	-0.257461	chr3L	8516321	8516499	179	-	263	376	172	198	0.8709	0.8724	0.8152	0.7734
GstO2	intronretention_Junction_50595	intronretentionright-Junction_50595	J002	0.0105184	6.99955	0.00815301	0.078076	8.81229	10.0126	0.566215	chr3L	8516452	8516566	115	-	39	55	39	58	0.1291	0.1276	0.1848	0.2266	-0.105038
Tsp66E	intronretention_Junction_50914	intronretentionleft-Junction_50914	J001	0.0120887	8.45931	0.0036318	0.0444959	7.55829	8.96863	0.702326	chr3L	8905871	8906067	197	+	20	14	53	71	0.2817	0.2295	0.4454	0.4277
Tsp66E	intronretention_Junction_50914	intronretentionleft-Junction_50914	J002	0.0119708	8.48568	0.00357952	0.0440164	10.7523	9.75761	-0.455451	chr3L	8905814	8905919	106	+	51	47	66	95	0.7183	0.7705	0.5546	0.5723
Tsp66E	intronretention_Junction_50914	intronretentionright-Junction_50914	J001	0.0129039	21.9031	2.86772e-06	0.00014983	7.13667	9.43589	1.14652	chr3L	8905871	8906067	197	+	20	14	53	71	0.2174	0.1609	0.4569	0.4522
Tsp66E	intronretention_Junction_50914	intronretentionright-Junction_50914	J002	0.012745	22.002	2.72373e-06	0.000143892	11.5268	10.0029	-0.687956	chr3L	8906020	8906136	117	+	72	73	63	86	0.7826	0.8391	0.5431	0.5478	0.164309
Dhpr	intronretention_Junction_51268	intronretentionleft-Junction_51268	J001	0.0140684	10.7385	0.00104927	0.0177152	14.8355	13.7794	-0.449023	chr3L	9127990	9128085	96	+	247	192	175	248	0.5538	0.6316	0.4268	0.4374
Dhpr	intronretention_Junction_51268	intronretentionleft-Junction_51268	J002	0.0140677	10.7389	0.00104904	0.0177152	13.6403	14.7057	0.453587	chr3L	9127918	9128038	121	+	199	112	235	319	0.4462	0.3684	0.5732	0.5626
Dhpr	intronretention_Junction_51268	intronretentionright-Junction_51268	J001	0.00553841	25.4349	4.57571e-07	3.07735e-05	14.902	13.7142	-0.505024	chr3L	9127990	9128085	96	+	247	192	175	248	0.6382	0.669	0.4642	0.4751
Dhpr	intronretention_Junction_51268	intronretentionright-Junction_51268	J002	0.0055432	25.4239	4.60181e-07	3.09125e-05	12.788	14.1214	0.5723	chr3L	9128038	9128157	120	+	140	95	202	274	0.3618	0.331	0.5358	0.5249	-0.160935
Fdxh	intronretention_Junction_51758	intronretentionleft-Junction_51758	J001	0.0138623	4.21605	0.0400432	0.223652	14.185	13.5773	-0.259499	chr3L	9363802	9363863	62	-	308	220	104	173	0.7213	0.7774	0.6624	0.6504
Fdxh	intronretention_Junction_51758	intronretentionleft-Junction_51758	J002	0.013949	4.20092	0.0404021	0.225007	10.6518	11.4527	0.358727	chr3L	9363730	9363850	121	-	119	63	53	93	0.2787	0.2226	0.3376	0.3496
Fdxh	intronretention_Junction_51758	intronretentionright-Junction_51758	J001	0.0401973	5.53023	0.0186907	0.13683	14.3927	13.3606	-0.440752	chr3L	9363802	9363863	62	-	308	220	104	173	0.9194	0.9402	0.8889	0.8122
Fdxh	intronretention_Junction_51758	intronretentionright-Junction_51758	J002	0.0412586	5.43305	0.0197591	0.142021	6.49648	8.06348	0.8314	chr3L	9363816	9363916	101	-	27	14	13	40	0.0806	0.0598	0.1111	0.1878	-0.121015
CG4080	intronretention_Junction_51799	intronretentionleft-Junction_51799	J001	0.132961	7.78727	0.00526156	0.0578266	8.23962	5.48615	-1.51994	chr3L	9383525	9383665	141	-	62	70	10	0	0.6889	0.8434	0.2857	INF
CG4080	intronretention_Junction_51799	intronretentionleft-Junction_51799	J002	0.135406	7.68395	0.00557142	0.0599125	5.16884	7.97984	1.59333	chr3L	9383457	9383573	117	-	28	13	25	0	0.3111	0.1566	0.7143	INF
CG4080	intronretention_Junction_51799	intronretentionright-Junction_51799	J001	0.050638	5.13406	0.0234607	0.158045	7.54263	5.94986	-0.88202	chr3L	9383525	9383665	141	-	62	70	10	0	0.6813	0.7778	0.4167	INF
CG4080	intronretention_Junction_51799	intronretentionright-Junction_51799	J002	0.0523743	5.05862	0.0245037	0.162388	5.05032	6.83957	1.07308	chr3L	9383618	9383737	120	-	29	20	14	0	0.3187	0.2222	0.5833	INF	-0.396228
Cdk5alpha	intronretention_Junction_519	intronretentionleft-Junction_519	J001	0.0336185	16.4434	5.01235e-05	0.00164312	18.9472	17.0282	-0.798102	chr2L	10308753	10308811	59	-	628	505	569	827	0.6775	0.7123	0.3768	0.4905
Cdk5alpha	intronretention_Junction_519	intronretentionleft-Junction_519	J002	0.0336193	16.443	5.01337e-05	0.00164312	16.1172	18.0557	0.809072	chr2L	10308680	10308801	122	-	299	204	941	859	0.3225	0.2877	0.6232	0.5095
Cdk5alpha	intronretention_Junction_519	intronretentionright-Junction_519	J001	0.00293632	23.0575	1.57224e-06	9.04509e-05	18.381	17.5941	-0.327224	chr2L	10308753	10308811	59	-	628	505	569	827	0.6085	0.5865	0.4847	0.4803
Cdk5alpha	intronretention_Junction_519	intronretentionright-Junction_519	J002	0.0029368	23.0552	1.57419e-06	9.04712e-05	17.0043	17.8393	0.347937	chr2L	10308764	10308879	116	-	404	356	605	895	0.3915	0.4135	0.5153	0.5197	-0.178277
CG42268	intronretention_Junction_52256	intronretentionleft-Junction_52256	J001	0.0458811	5.13872	0.0233979	0.157883	13.8454	12.6151	-0.529592	chr3L	9728389	9728770	382	-	273	202	63	152	0.3719	0.3328	0.1603	0.2603
CG42268	intronretention_Junction_52256	intronretentionleft-Junction_52256	J002	0.045813	5.14544	0.0233076	0.157516	15.9134	17.0799	0.488209	chr3L	9728320	9728437	118	-	461	405	330	432	0.6281	0.6672	0.8397	0.7397
CG42268	intronretention_Junction_52256	intronretentionright-Junction_52256	J001	0.162786	4.98426	0.0255789	0.166575	14.3356	12.1166	-0.955743	chr3L	9728389	9728770	382	-	273	202	63	152	0.8835	0.8145	0.4468	0.7273
CG42268	intronretention_Junction_52256	intronretentionright-Junction_52256	J002	0.163324	4.96899	0.0258057	0.167459	8.7246	10.9333	1.02753	chr3L	9728723	9728813	91	-	36	46	78	57	0.1165	0.1855	0.5532	0.2727	-0.1465
CG8177	intronretention_Junction_52317	intronretentionleft-Junction_52317	J001	0.0181801	4.24056	0.0394691	0.221663	17.2822	16.6056	-0.28256	chr3L	9777991	9778050	60	+	711	539	258	446	0.5715	0.6486	0.4943	0.518
CG8177	intronretention_Junction_52317	intronretentionleft-Junction_52317	J002	0.0181857	4.23945	0.0394951	0.221722	15.8142	16.5069	0.290409	chr3L	9777918	9778039	122	+	533	292	264	415	0.4285	0.3514	0.5057	0.482
CG8177	intronretention_Junction_52317	intronretentionright-Junction_52317	J001	0.0738606	5.50776	0.0189323	0.13813	17.7749	16.109	-0.695699	chr3L	9777991	9778050	60	+	711	539	258	446	0.6124	0.6432	0.3101	0.4967
CG8177	intronretention_Junction_52317	intronretentionright-Junction_52317	J002	0.0738625	5.50762	0.0189338	0.13813	15.9901	17.6568	0.69642	chr3L	9778003	9778121	119	+	450	299	574	452	0.3876	0.3568	0.6899	0.5033	-0.160813
CG8177	intronretention_Junction_52318	intronretentionleft-Junction_52318	J001	0.0135785	19.4678	1.02308e-05	0.000434403	17.8438	16.6129	-0.513346	chr3L	9778280	9778340	61	+	402	361	683	593	0.8553	0.8454	0.732	0.6777
CG8177	intronretention_Junction_52318	intronretentionleft-Junction_52318	J002	0.0136096	19.4358	1.0404e-05	0.000439464	11.9344	13.5417	0.696869	chr3L	9778209	9778328	120	+	68	66	250	282	0.1447	0.1546	0.268	0.3223
CG8177	intronretention_Junction_52318	intronretentionright-Junction_52318	J001	0.00676948	10.5843	0.0011405	0.0189211	17.5528	16.8881	-0.277224	chr3L	9778280	9778340	61	+	402	361	683	593	0.7657	0.7882	0.6969	0.6678
CG8177	intronretention_Junction_52318	intronretentionright-Junction_52318	J002	0.00678558	10.5688	0.00115014	0.0190286	13.2911	14.2034	0.390164	chr3L	9778293	9778404	112	+	123	97	297	295	0.2343	0.2118	0.3031	0.3322	-0.152359
CG6912	intronretention_Junction_53973	intronretentionleft-Junction_53973	J001	0.00945312	6.59781	0.0102104	0.0916142	14.9907	14.3137	-0.286904	chr3R	10962114	10962192	79	-	259	174	271	240	0.7057	0.6566	0.593	0.5634
CG6912	intronretention_Junction_53973	intronretentionleft-Junction_53973	J002	0.00947469	6.58833	0.0102649	0.0919321	12.3916	13.2067	0.352948	chr3R	10962044	10962162	119	-	108	91	186	186	0.2943	0.3434	0.407	0.4366
CG6912	intronretention_Junction_53973	intronretentionright-Junction_53973	J001	0.0058831	5.65104	0.017445	0.130722	14.9105	14.3798	-0.224915	chr3R	10962114	10962192	79	-	259	174	271	240	0.7077	0.677	0.6049	0.6154
CG6912	intronretention_Junction_53973	intronretentionright-Junction_53973	J002	0.00590197	5.64192	0.017536	0.131162	12.1543	12.8658	0.309456	chr3R	10962145	10962255	111	-	107	83	177	150	0.2923	0.323	0.3951	0.3846	-0.101151
GlyS	intronretention_Junction_53994	intronretentionleft-Junction_53994	J001	0.0740552	5.302	0.0213009	0.148288	13.3024	11.9017	-0.608473	chr3R	10968586	10968679	94	-	166	128	69	170	0.8469	0.8889	0.6161	0.7763
GlyS	intronretention_Junction_53994	intronretentionleft-Junction_53994	J002	0.0746917	5.26775	0.0217241	0.150053	7.48917	9.0704	0.78703	chr3R	10968514	10968634	121	-	30	16	43	49	0.1531	0.1111	0.3839	0.2237
GlyS	intronretention_Junction_53994	intronretentionright-Junction_53994	J001	0.0109488	7.33457	0.00676408	0.0687366	13.0367	12.2197	-0.354717	chr3R	10968586	10968679	94	-	166	128	69	170	0.7155	0.7485	0.633	0.5842
GlyS	intronretention_Junction_53994	intronretentionright-Junction_53994	J002	0.0110311	7.30581	0.00687321	0.0695474	9.81717	10.9233	0.504779	chr3R	10968632	10968746	115	-	66	43	40	121	0.2845	0.2515	0.367	0.4158	-0.182066
CG31301	intronretention_Junction_54307	intronretentionleft-Junction_54307	J001	0.0392987	9.25504	0.00234848	0.0323069	5.48234	3.096	-1.84328	chr3R	11172405	11172514	110	+	13	11	0	6	0.3333	0.3793	INF	0.0833
CG31301	intronretention_Junction_54307	intronretentionleft-Junction_54307	J002	0.0347356	9.70642	0.00183625	0.0269897	6.97967	8.2334	0.64951	chr3R	11172357	11172453	97	+	26	18	0	66	0.6667	0.6207	INF	0.9167
CG31301	intronretention_Junction_54307	intronretentionright-Junction_54307	J001	0.0392676	6.63571	0.00999544	0.0902572	5.27453	3.23195	-1.57852	chr3R	11172405	11172514	110	+	13	11	0	6	0.2826	0.3333	INF	0.087
CG31301	intronretention_Junction_54307	intronretentionright-Junction_54307	J002	0.0345918	6.96674	0.00830386	0.0791265	7.33136	8.37114	0.530014	chr3R	11172467	11172580	114	+	33	22	0	63	0.7174	0.6667	INF	0.913	-0.153676
CG6171	intronretention_Junction_54333	intronretentionleft-Junction_54333	J001	0.0282506	6.73252	0.0094671	0.0868089	11.132	9.86048	-0.578177	chr3R	11188819	11188872	54	-	119	72	32	67	0.4798	0.439	0.2353	0.3384
CG6171	intronretention_Junction_54333	intronretentionleft-Junction_54333	J002	0.028134	6.75135	0.00936769	0.0861215	11.6191	12.7504	0.494841	chr3R	11188760	11188867	108	-	129	92	104	131	0.5202	0.561	0.7647	0.6616
CG6171	intronretention_Junction_54333	intronretentionright-Junction_54333	J001	0.0127984	13.6131	0.000224615	0.00555648	11.1884	9.83321	-0.616034	chr3R	11188819	11188872	54	-	119	72	32	67	0.6879	0.6545	0.4923	0.4295
CG6171	intronretention_Junction_54333	intronretentionright-Junction_54333	J002	0.0128621	13.581	0.000228489	0.00563273	8.91932	10.4564	0.717825	chr3R	11188825	11188921	97	-	54	38	33	89	0.3121	0.3455	0.5077	0.5705	-0.163838
CG14868	intronretention_Junction_54352	intronretentionleft-Junction_54352	J001	0.00928906	4.41354	0.0356548	0.207619	13.8185	13.3199	-0.213653	chr3R	11194735	11194786	52	-	198	198	126	175	0.8148	0.8285	0.7283	0.7609
CG14868	intronretention_Junction_54352	intronretentionleft-Junction_54352	J002	0.00942839	4.38757	0.0362019	0.209716	8.88945	9.8169	0.438381	chr3R	11194662	11194783	122	-	45	41	47	55	0.1852	0.1715	0.2717	0.2391
CG14868	intronretention_Junction_54352	intronretentionright-Junction_54352	J001	0.00812968	19.2185	1.16577e-05	0.00048169	14.0578	13.0816	-0.418357	chr3R	11194735	11194786	52	-	198	198	126	175	0.8534	0.8646	0.7119	0.7028
CG14868	intronretention_Junction_54352	intronretentionright-Junction_54352	J002	0.0082507	19.1119	1.23273e-05	0.000505684	8.27264	10.2106	0.921707	chr3R	11194739	11194854	116	-	34	31	51	74	0.1466	0.1354	0.2881	0.2972	-0.154988
tweek	intronretention_Junction_5471	intronretentionleft-Junction_5471	J001	0.020939	19.6523	9.2893e-06	0.000400241	9.29196	7.07193	-1.11325	chr2L	16894943	16894999	57	+	112	59	0	24	0.7368	0.7564	INF	0.3478
tweek	intronretention_Junction_5471	intronretentionleft-Junction_5471	J002	0.0214961	19.4237	1.047e-05	0.000441924	6.31951	8.80277	1.29648	chr2L	16894873	16894991	119	+	40	19	0	45	0.2632	0.2436	INF	0.6522
tweek	intronretention_Junction_5471	intronretentionright-Junction_5471	J001	0.0532833	8.53562	0.00348262	0.043214	8.95058	7.28948	-0.834441	chr2L	16894943	16894999	57	+	112	59	0	24	0.896	0.831	INF	0.5714
tweek	intronretention_Junction_5471	intronretentionright-Junction_5471	J002	0.0577832	8.1673	0.00426523	0.0499045	4.20626	6.54703	1.51263	chr2L	16894952	16895073	122	+	13	12	0	18	0.104	0.169	INF	0.4286	-0.39131
CG6006	intronretention_Junction_54965	intronretentionleft-Junction_54965	J001	0.0318873	11.052	0.000885897	0.0156391	6.17879	4.04677	-1.42629	chr3R	11984017	11984641	625	+	10	18	5	7	0.5	0.6207	0.2273	0.1892
CG6006	intronretention_Junction_54965	intronretentionleft-Junction_54965	J002	0.0305694	11.1907	0.000822104	0.0147324	5.47741	7.13453	0.956151	chr3R	11983970	11984065	96	+	10	11	17	30	0.5	0.3793	0.7727	0.8108
CG6006	intronretention_Junction_54965	intronretentionright-Junction_54965	J001	0.114152	8.33313	0.00389285	0.0467479	6.40992	3.89792	-1.67866	chr3R	11984017	11984641	625	+	10	18	5	7	0.1351	0.3158	0.037	0.0556
CG6006	intronretention_Junction_54965	intronretentionright-Junction_54965	J002	0.109737	8.55977	0.00343673	0.0428196	10.064	12.1044	0.914111	chr3R	11984594	11984675	82	+	64	39	130	119	0.8649	0.6842	0.963	0.9444	-0.152993
CG14898	intronretention_Junction_55219	intronretentionleft-Junction_55219	J001	0.0239366	13.1852	0.000282174	0.00660965	10.7575	12.3071	0.686758	chr3R	12307769	12307824	56	-	68	79	94	143	0.3269	0.397	0.6395	0.5586
CG14898	intronretention_Junction_55219	intronretentionleft-Junction_55219	J002	0.0239253	13.1894	0.000281538	0.00660018	12.5951	11.0798	-0.667303	chr3R	12307696	12307817	122	-	140	120	53	113	0.6731	0.603	0.3605	0.4414
CG14898	intronretention_Junction_55219	intronretentionright-Junction_55219	J001	0.0454988	5.96327	0.014607	0.115993	10.8923	12.1717	0.566915	chr3R	12307769	12307824	56	-	68	79	94	143	0.3469	0.4093	0.6528	0.5144
CG14898	intronretention_Junction_55219	intronretentionright-Junction_55219	J002	0.0454839	5.96478	0.0145944	0.11591	12.4957	11.2319	-0.556163	chr3R	12307777	12307892	116	-	128	114	50	135	0.6531	0.5907	0.3472	0.4856	0.194055
CG42342	intronretention_Junction_55257	intronretentionleft-Junction_55257	J001	0.022554	9.77308	0.00177086	0.0262866	11.3889	9.99677	-0.629632	chr3R	12391723	12391923	201	+	166	130	20	52	0.686	0.6075	0.4651	0.4094
CG42342	intronretention_Junction_55257	intronretentionleft-Junction_55257	J002	0.022633	9.75215	0.00179113	0.0265114	9.47035	10.9344	0.671812	chr3R	12391660	12391771	112	+	76	84	23	75	0.314	0.3925	0.5349	0.5906
CG42342	intronretention_Junction_55257	intronretentionright-Junction_55257	J001	0.0140349	9.78254	0.00176177	0.0261859	11.2956	10.1054	-0.538093	chr3R	12391723	12391923	201	+	166	130	20	52	0.6721	0.7065	0.5556	0.4643
CG42342	intronretention_Junction_55257	intronretentionright-Junction_55257	J002	0.014163	9.73994	0.00180307	0.0266327	8.83537	10.2452	0.661953	chr3R	12391876	12391989	114	+	81	54	16	60	0.3279	0.2935	0.4444	0.5357	-0.190974
cpx	intronretention_Junction_55318	intronretentionleft-Junction_55318	J001	0.0151867	12.283	0.000457092	0.00936833	17.635	16.5353	-0.458931	chr3R	124307	125510	1204	+	983	733	182	382	0.4804	0.5524	0.3454	0.3666
cpx	intronretention_Junction_55318	intronretentionleft-Junction_55318	J002	0.0151848	12.2844	0.000456756	0.00936833	17.4802	18.552	0.445685	chr3R	124235	124355	121	+	1063	594	345	660	0.5196	0.4476	0.6546	0.6334
cpx	intronretention_Junction_55318	intronretentionright-Junction_55318	J001	0.024925	12.0254	0.000524797	0.0104076	17.775	16.3878	-0.578901	chr3R	124307	125510	1204	+	983	733	182	382	0.6031	0.5713	0.3377	0.4356
cpx	intronretention_Junction_55318	intronretentionright-Junction_55318	J002	0.0249267	12.0247	0.000525004	0.0104081	16.5457	17.9291	0.576943	chr3R	125463	125580	118	+	647	550	357	495	0.3969	0.4287	0.6623	0.5644	-0.150559
Irc	intronretention_Junction_55480	intronretentionleft-Junction_55480	J001	0.0848439	6.04587	0.0139388	0.11235	15.3253	13.9893	-0.566212	chr3R	12832415	12832470	56	+	233	240	40	506	0.5132	0.5085	0.1826	0.3541
Irc	intronretention_Junction_55480	intronretentionleft-Junction_55480	J002	0.0848004	6.04865	0.013917	0.112253	15.1797	16.508	0.557962	chr3R	12832345	12832463	119	+	221	232	179	923	0.4868	0.4915	0.8174	0.6459
Irc	intronretention_Junction_55480	intronretentionright-Junction_55480	J001	0.026857	3.98736	0.0458428	0.243064	15.0361	14.318	-0.30422	chr3R	12832415	12832470	56	+	233	240	40	506	0.5601	0.6283	0.4082	0.5
Irc	intronretention_Junction_55480	intronretentionright-Junction_55480	J002	0.0268683	3.9862	0.0458743	0.243096	13.7312	14.4637	0.312073	chr3R	12832423	12832543	121	+	183	142	58	506	0.4399	0.3717	0.5918	0.5	-0.175377
RpL35A	intronretention_Junction_55568	intronretentionleft-Junction_55568	J001	0.018048	38.8183	4.65156e-10	7.37214e-08	24.4379	22.3293	-0.868729	chr3R	1291453	1291520	68	-	3466	3474	1900	3143	0.8153	0.8574	0.6219	0.5857
RpL35A	intronretention_Junction_55568	intronretentionleft-Junction_55568	J002	0.018052	38.81	4.67133e-10	7.38291e-08	18.712	20.8822	0.898208	chr3R	1291380	1291501	122	-	785	578	1155	2223	0.1847	0.1426	0.3781	0.4143
RpL35A	intronretention_Junction_55568	intronretentionright-Junction_55568	J001	0.0128401	10.9897	0.000916183	0.0160493	23.8563	22.9105	-0.389631	chr3R	1291453	1291520	68	-	3466	3474	1900	3143	0.4918	0.555	0.3776	0.4034
RpL35A	intronretention_Junction_55568	intronretentionright-Junction_55568	J002	0.0128398	10.99	0.000916054	0.0160493	23.5212	24.4633	0.387989	chr3R	1291473	1291594	122	-	3581	2785	3132	4648	0.5082	0.445	0.6224	0.5966	-0.164852
Prx3	intronretention_Junction_55807	intronretentionleft-Junction_55807	J001	0.065427	5.41058	0.0200151	0.143119	13.0464	11.7119	-0.581805	chr3R	13371773	13371903	131	-	208	184	30	131	0.5098	0.5662	0.24	0.3958
Prx3	intronretention_Junction_55807	intronretentionleft-Junction_55807	J002	0.0653919	5.41298	0.0199876	0.142994	12.5559	13.8724	0.56679	chr3R	13371704	13371821	118	-	200	141	95	200	0.4902	0.4338	0.76	0.6042
Prx3	intronretention_Junction_55807	intronretentionright-Junction_55807	J001	0.0157366	12.0164	0.00052734	0.0104471	12.9557	11.8859	-0.465991	chr3R	13371773	13371903	131	-	208	184	30	131	0.8739	0.8364	0.6818	0.7043
Prx3	intronretention_Junction_55807	intronretentionright-Junction_55807	J002	0.0161066	11.8911	0.000564022	0.0109845	7.43539	9.25951	0.905158	chr3R	13371856	13371969	114	-	30	36	14	55	0.1261	0.1636	0.3182	0.2957	-0.214688
cpo	intronretention_Junction_56319	intronretentionleft-Junction_56319	J001	0.0206445	8.953	0.00277015	0.0363248	10.1666	9.06733	-0.514433	chr3R	13836680	13836817	138	+	85	72	26	41	0.8416	0.7912	0.5778	0.6508
cpo	intronretention_Junction_56319	intronretentionleft-Junction_56319	J002	0.0213586	8.84515	0.00293869	0.0380351	5.94004	7.66408	0.950713	chr3R	13836639	13836728	90	+	16	19	19	22	0.1584	0.2088	0.4222	0.3492
cpo	intronretention_Junction_56319	intronretentionright-Junction_56319	J001	0.0446539	12.7476	0.000356465	0.00789482	10.692	8.56833	-0.994962	chr3R	13836680	13836817	138	+	85	72	26	41	0.4645	0.5414	0.1733	0.2789
cpo	intronretention_Junction_56319	intronretentionright-Junction_56319	J002	0.04445	12.7905	0.000348384	0.00777029	10.704	12.618	0.846193	chr3R	13836770	13836887	118	+	98	61	124	106	0.5355	0.4586	0.8267	0.7211	-0.252185
Rim2	intronretention_Junction_5643	intronretentionleft-Junction_5643	J001	0.0320871	6.33707	0.011824	0.100386	12.2161	11.0729	-0.505273	chr2L	1718151	1718225	75	-	123	151	30	113	0.5279	0.5741	0.3	0.4232
Rim2	intronretention_Junction_5643	intronretentionleft-Junction_5643	J002	0.032069	6.33953	0.0118076	0.100331	11.5065	12.6243	0.489986	chr2L	1718080	1718199	120	-	110	112	70	154	0.4721	0.4259	0.7	0.5768
Rim2	intronretention_Junction_5643	intronretentionright-Junction_5643	J001	0.0214547	9.41967	0.0021467	0.0302778	12.2429	11.0677	-0.519326	chr2L	1718151	1718225	75	-	123	151	30	113	0.691	0.7056	0.4286	0.5512
Rim2	intronretention_Junction_5643	intronretentionright-Junction_5643	J002	0.0215747	9.39101	0.00218052	0.0306421	9.53373	10.8828	0.618835	chr2L	1718178	1718289	112	-	55	63	40	92	0.309	0.2944	0.5714	0.4488	-0.180612
Rheb	intronretention_Junction_56542	intronretentionleft-Junction_56542	J001	0.00769908	13.8156	0.000201655	0.00506336	14.0588	13.071	-0.423332	chr3R	1394993	1395120	128	+	194	181	109	214	0.6532	0.6487	0.4698	0.5169
Rheb	intronretention_Junction_56542	intronretentionleft-Junction_56542	J002	0.00771172	13.804	0.000202901	0.00508567	11.9752	13.1018	0.489845	chr3R	1394928	1395041	114	+	103	98	123	200	0.3468	0.3513	0.5302	0.4831
Rheb	intronretention_Junction_56542	intronretentionright-Junction_56542	J001	0.00691067	19.8104	8.55145e-06	0.000373122	14.1664	12.967	-0.514064	chr3R	1394993	1395120	128	+	194	181	109	214	0.5706	0.5764	0.3746	0.4163
Rheb	intronretention_Junction_56542	intronretentionright-Junction_56542	J002	0.00690696	19.8161	8.52608e-06	0.000372301	13.1675	14.3393	0.501136	chr3R	1395073	1395190	118	+	146	133	182	300	0.4294	0.4236	0.6254	0.5837	-0.157119
Cbp20	intronretention_Junction_56573	intronretentionleft-Junction_56573	J001	0.0482101	6.75954	0.00932477	0.0858636	13.2913	11.7866	-0.654355	chr3R	13990498	13990552	55	+	197	169	51	133	0.8312	0.8622	0.7612	0.6157
Cbp20	intronretention_Junction_56573	intronretentionleft-Junction_56573	J002	0.0488569	6.6857	0.00971893	0.0884482	7.92537	9.72382	0.871083	chr3R	13990442	13990546	105	+	40	27	16	83	0.1688	0.1378	0.2388	0.3843
Cbp20	intronretention_Junction_56573	intronretentionright-Junction_56573	J001	0.0158218	4.64324	0.0311762	0.190448	12.8756	12.2341	-0.278837	chr3R	13990498	13990552	55	+	197	169	51	133	0.8174	0.8492	0.6986	0.76
Cbp20	intronretention_Junction_56573	intronretentionright-Junction_56573	J002	0.0161832	4.60164	0.0319414	0.193605	7.86143	8.95317	0.539137	chr3R	13990505	13990625	121	+	44	30	22	42	0.1826	0.1508	0.3014	0.24	-0.180159
CG14312	intronretention_Junction_56774	intronretentionleft-Junction_56774	J001	0.0245886	7.75129	0.00536741	0.0585486	12.2823	11.2008	-0.477029	chr3R	14109079	14109135	57	-	185	149	51	68	0.7708	0.8232	0.68	0.5913
CG14312	intronretention_Junction_56774	intronretentionleft-Junction_56774	J002	0.0249574	7.68417	0.00557073	0.0599125	8.06782	9.51508	0.701559	chr3R	14109013	14109127	115	-	55	32	24	47	0.2292	0.1768	0.32	0.4087
CG14312	intronretention_Junction_56774	intronretentionright-Junction_56774	J001	0.0239247	8.5764	0.00340548	0.042521	12.2838	11.1992	-0.478443	chr3R	14109079	14109135	57	-	185	149	51	68	0.794	0.8563	0.6375	0.68
CG14312	intronretention_Junction_56774	intronretentionright-Junction_56774	J002	0.0243834	8.49422	0.00356277	0.0438699	7.57007	9.12244	0.769819	chr3R	14109088	14109203	116	-	48	25	29	32	0.206	0.1437	0.3625	0.32	-0.206346
l(3)05822	intronretention_Junction_56780	intronretentionleft-Junction_56780	J001	0.0286038	4.11246	0.0425684	0.232261	8.71691	9.52248	0.384424	chr3R	14115742	14115800	59	-	39	32	0	118	0.7091	0.6667	INF	0.8429
l(3)05822	intronretention_Junction_56780	intronretentionleft-Junction_56780	J002	0.0307184	3.96906	0.0463437	0.244682	6.51142	5.17904	-0.805834	chr3R	14115687	14115790	104	-	16	16	0	22	0.2909	0.3333	INF	0.1571
l(3)05822	intronretention_Junction_56780	intronretentionright-Junction_56780	J001	0.0202928	9.75663	0.00178678	0.0264539	8.40776	9.89108	0.707596	chr3R	14115742	14115800	59	-	39	32	0	118	0.3861	0.4103	INF	0.6484
l(3)05822	intronretention_Junction_56780	intronretentionright-Junction_56780	J002	0.020341	9.74325	0.00179982	0.0265986	9.66408	8.12632	-0.741959	chr3R	14115753	14115873	121	-	62	46	0	64	0.6139	0.5897	INF	0.3516	0.241552
Gfrl	intronretention_Junction_58991	intronretentionleft-Junction_58991	J001	0.0382335	13.6038	0.000225733	0.00557445	7.58993	3.79386	-2.40325	chr3R	16225689	16226899	1211	-	123	128	0	2	0.4473	0.5356	INF	0.0714
Gfrl	intronretention_Junction_58991	intronretentionleft-Junction_58991	J002	0.0381717	13.6116	0.000224793	0.00555848	7.68956	10.1329	1.18072	chr3R	16225618	16225737	120	-	152	111	0	26	0.5527	0.4644	INF	0.9286
Gfrl	intronretention_Junction_58991	intronretentionright-Junction_58991	J001	0.036617	26.0604	3.30906e-07	2.31867e-05	8.18766	3.4439	-3.01055	chr3R	16225689	16226899	1211	-	123	128	0	2	0.6212	0.6995	INF	0.0667
Gfrl	intronretention_Junction_58991	intronretentionright-Junction_58991	J002	0.0370266	25.9493	3.50507e-07	2.43205e-05	6.37284	9.70258	1.69302	chr3R	16226852	16226969	118	-	75	55	0	28	0.3788	0.3005	INF	0.9333	-0.357687
Stat92E	intronretention_Junction_59057	intronretentionleft-Junction_59057	J001	0.0296242	23.3356	1.36059e-06	7.97257e-05	5.06949	8.13825	1.73859	chr3R	16364437	16364941	505	-	10	12	0	57	0.1639	0.1765	INF	0.6196
Stat92E	intronretention_Junction_59057	intronretentionleft-Junction_59057	J002	0.028633	23.7423	1.10138e-06	6.67359e-05	9.26248	6.84496	-1.22237	chr3R	16364390	16364485	96	-	51	56	0	35	0.8361	0.8235	INF	0.3804
Stat92E	intronretention_Junction_59057	intronretentionright-Junction_59057	J001	0.0384718	4.63646	0.0312994	0.191016	5.77723	7.23809	0.825978	chr3R	16364437	16364941	505	-	10	12	0	57	0.3226	0.25	INF	0.5135
Stat92E	intronretention_Junction_59057	intronretentionright-Junction_59057	J002	0.0376022	4.69645	0.030225	0.186297	8.33443	7.1004	-0.63464	chr3R	16364894	16364990	97	-	21	36	0	54	0.6774	0.75	INF	0.4865	0.271743
pre-mod(mdg4)-J	intronretention_Junction_60124	intronretentionleft-Junction_60124	J001	0.0207176	12.4625	0.000415208	0.00878545	15.5449	14.2926	-0.529584	chr3R	17183480	17183725	246	-	418	286	144	240	0.7398	0.8034	0.6128	0.5797
pre-mod(mdg4)-J	intronretention_Junction_60124	intronretentionleft-Junction_60124	J002	0.0207843	12.4324	0.000421953	0.00888523	11.5685	13.0153	0.631785	chr3R	17183408	17183528	121	-	147	70	91	174	0.2602	0.1966	0.3872	0.4203
pre-mod(mdg4)-J	intronretention_Junction_60124	intronretentionright-Junction_60124	J001	0.0131447	3.91691	0.0478026	0.249196	15.1942	14.646	-0.231793	chr3R	17183480	17183725	246	-	418	286	144	240	0.8548	0.8148	0.7784	0.7619
pre-mod(mdg4)-J	intronretention_Junction_60124	intronretentionright-Junction_60124	J002	0.0132829	3.89244	0.048504	0.251342	9.80125	10.6772	0.401272	chr3R	17183678	17183796	119	-	71	65	41	75	0.1452	0.1852	0.2216	0.2381	-0.162015
nAChRbeta2	intronretention_Junction_63480	intronretentionleft-Junction_63480	J001	0.0225347	15.7912	7.07297e-05	0.00220148	14.1084	15.6806	0.665055	chr3R	20335969	20336622	654	-	146	143	373	527	0.357	0.44	0.6521	0.5975
nAChRbeta2	intronretention_Junction_63480	intronretentionleft-Junction_63480	J002	0.0225436	15.786	7.09272e-05	0.00220521	15.544	13.9631	-0.669509	chr3R	20335896	20336017	122	-	263	182	199	355	0.643	0.56	0.3479	0.4025
nAChRbeta2	intronretention_Junction_63480	intronretentionright-Junction_63480	J001	0.0389768	17.9786	2.23407e-05	0.00083352	13.842	15.953	0.893111	chr3R	20335969	20336622	654	-	146	143	373	527	0.452	0.5813	0.8144	0.7739
nAChRbeta2	intronretention_Junction_63480	intronretentionright-Junction_63480	J002	0.0390578	17.9461	2.27249e-05	0.000845084	13.6801	11.4311	-0.978331	chr3R	20336575	20336694	120	-	177	103	85	154	0.548	0.4187	0.1856	0.2261	0.24658
CG13624	intronretention_Junction_63552	intronretentionleft-Junction_63552	J001	0.0466685	5.40012	0.0201353	0.143582	15.1062	13.7437	-0.578694	chr3R	20386039	20386102	64	-	184	207	247	239	0.6643	0.761	0.4862	0.5901
CG13624	intronretention_Junction_63552	intronretentionleft-Junction_63552	J002	0.0467062	5.3963	0.0201794	0.143752	12.0092	13.4237	0.613388	chr3R	20385968	20386087	120	-	93	65	261	166	0.3357	0.239	0.5138	0.4099
CG13624	intronretention_Junction_63552	intronretentionright-Junction_63552	J001	0.0181764	11.5562	0.000675238	0.0126212	14.9476	13.8829	-0.452223	chr3R	20386039	20386102	64	-	184	207	247	239	0.8889	0.9039	0.753	0.8074
CG13624	intronretention_Junction_63552	intronretentionright-Junction_63552	J002	0.0184011	11.4779	0.000704304	0.0130403	7.99327	9.79572	0.870185	chr3R	20386055	20386175	121	-	23	22	81	57	0.1111	0.0961	0.247	0.1926	-0.190372
slo	intronretention_Junction_63691	intronretentionleft-Junction_63691	J001	0.0047749	42.5739	6.80613e-11	1.39298e-08	15.5945	14.1808	-0.598004	chr3R	20500291	20500490	200	+	349	262	156	276	0.683	0.6823	0.4522	0.4767
slo	intronretention_Junction_63691	intronretentionleft-Junction_63691	J002	0.00478047	42.5489	6.89368e-11	1.40584e-08	13.0003	14.6368	0.69948	chr3R	20500221	20500339	119	+	162	122	189	303	0.317	0.3177	0.5478	0.5233
slo	intronretention_Junction_63691	intronretentionright-Junction_63691	J001	0.0788512	6.2877	0.0121579	0.10239	15.7939	13.9509	-0.779777	chr3R	20500291	20500490	200	+	349	262	156	276	0.5629	0.5848	0.24	0.4195
slo	intronretention_Junction_63691	intronretentionright-Junction_63691	J002	0.0788245	6.28973	0.012144	0.102318	14.7896	16.6239	0.771335	chr3R	20500443	20500563	121	+	271	186	494	382	0.4371	0.4152	0.76	0.5805	-0.216402
slo	intronretention_Junction_63692	intronretentionleft-Junction_63692	J001	0.0556377	10.1599	0.0014353	0.0225468	16.7091	14.7337	-0.830602	chr3R	20500603	20500887	285	+	471	347	237	274	0.7983	0.7214	0.4447	0.5781
slo	intronretention_Junction_63692	intronretentionleft-Junction_63692	J002	0.0556785	10.1529	0.00144071	0.0225943	12.7668	14.79	0.865329	chr3R	20500534	20500651	118	+	119	134	296	200	0.2017	0.2786	0.5553	0.4219
slo	intronretention_Junction_63692	intronretentionright-Junction_63692	J001	0.00360259	76.7126	1.97735e-18	1.71641e-15	16.565	14.8486	-0.721703	chr3R	20500603	20500887	285	+	471	347	237	274	0.6551	0.6699	0.41	0.4083
slo	intronretention_Junction_63692	intronretentionright-Junction_63692	J002	0.00360382	76.699	1.99102e-18	1.71641e-15	14.2743	16.1137	0.776278	chr3R	20500840	20500958	119	+	248	171	341	397	0.3449	0.3301	0.59	0.5917	-0.254257
slo	intronretention_Junction_63694	intronretentionleft-Junction_63694	J001	0.0351433	4.18262	0.0408405	0.226504	16.2433	15.2913	-0.40005	chr3R	20501040	20501353	314	+	363	285	324	331	0.4696	0.5053	0.4091	0.2969
slo	intronretention_Junction_63694	intronretentionleft-Junction_63694	J002	0.0351298	4.18411	0.0408046	0.226415	16.4376	17.3734	0.390803	chr3R	20500970	20501088	119	+	410	279	468	784	0.5304	0.4947	0.5909	0.7031
slo	intronretention_Junction_63694	intronretentionright-Junction_63694	J001	0.00956942	60.6309	6.88449e-15	3.43602e-12	16.8479	14.6759	-0.913091	chr3R	20501040	20501353	314	+	363	285	324	331	0.5902	0.5769	0.3124	0.2682
slo	intronretention_Junction_63694	intronretentionright-Junction_63694	J002	0.0095621	60.6669	6.75968e-15	3.40359e-12	15.6813	17.7352	0.858805	chr3R	20501306	20501427	122	+	252	209	713	903	0.4098	0.4231	0.6876	0.7318	-0.171767
slo	intronretention_Junction_63737	intronretentionleft-Junction_63737	J001	0.0160126	8.13452	0.00434302	0.0505534	10.4741	9.15989	-0.610755	chr3R	20521139	20521811	673	+	180	124	10	30	0.3956	0.4526	0.2222	0.2703
slo	intronretention_Junction_63737	intronretentionleft-Junction_63737	J002	0.0159517	8.14801	0.00431085	0.0502508	11.5295	12.5441	0.444976	chr3R	20521067	20521187	121	+	275	150	35	81	0.6044	0.5474	0.7778	0.7297
slo	intronretention_Junction_63737	intronretentionright-Junction_63737	J001	0.236961	12.4917	0.000408768	0.00869787	11.9134	7.7436	-1.95164	chr3R	20521139	20521811	673	+	180	124	10	30	0.9045	0.8986	0.1887	0.5769
slo	intronretention_Junction_63737	intronretentionright-Junction_63737	J002	0.238766	12.4077	0.000427567	0.00896033	5.52181	9.57869	2.143	chr3R	20521764	20521853	90	+	19	14	43	22	0.0955	0.1014	0.8113	0.4231	-0.235551
Pde11	intronretention_Junction_6374	intronretentionleft-Junction_6374	J001	0.159452	5.23345	0.0221566	0.152038	9.21926	7.0464	-1.0925	chr2L	18535128	18535183	56	-	65	72	13	14	0.6311	0.8372	0.3023	0.5
Pde11	intronretention_Junction_6374	intronretentionleft-Junction_6374	J002	0.160317	5.21093	0.0224453	0.153384	6.40989	8.59738	1.14501	chr2L	18535058	18535176	119	-	38	14	30	14	0.3689	0.1628	0.6977	0.5
Pde11	intronretention_Junction_6374	intronretentionright-Junction_6374	J001	0.0561417	11.3012	0.000774579	0.0141299	9.12526	7.10688	-1.01527	chr2L	18535128	18535183	56	-	65	72	13	14	0.6701	0.8	0.4333	0.3415
Pde11	intronretention_Junction_6374	intronretentionright-Junction_6374	J002	0.0568464	11.2194	0.000809449	0.0145744	6.27279	8.43445	1.14355	chr2L	18535136	18535256	121	-	32	18	17	27	0.3299	0.2	0.5667	0.6585	-0.351289
slo	intronretention_Junction_63767	intronretentionleft-Junction_63767	J001	0.0166042	9.41762	0.0021491	0.0303042	11.0432	9.89656	-0.52175	chr3R	20532395	20532497	103	+	211	155	0	52	0.8406	0.8378	INF	0.642
slo	intronretention_Junction_63767	intronretentionleft-Junction_63767	J002	0.0173376	9.25737	0.0023455	0.0322816	6.23722	8.18611	1.04091	chr3R	20532336	20532443	108	+	40	30	0	29	0.1594	0.1622	INF	0.358
slo	intronretention_Junction_63767	intronretentionright-Junction_63767	J001	0.0132772	4.19198	0.0406157	0.225697	10.8889	10.069	-0.372898	chr3R	20532395	20532497	103	+	211	155	0	52	0.7251	0.7143	INF	0.5778
slo	intronretention_Junction_63767	intronretentionright-Junction_63767	J002	0.0135211	4.1606	0.0413747	0.228487	8.00671	9.12679	0.548628	chr3R	20532450	20532571	122	+	80	62	0	38	0.2749	0.2857	INF	0.4222	-0.195522
bai	intronretention_Junction_64058	intronretentionleft-Junction_64058	J001	0.0463085	8.2349	0.00410924	0.0486583	15.8372	14.3236	-0.639289	chr3R	20865543	20865606	64	+	353	360	124	300	0.459	0.597	0.2838	0.3356
bai	intronretention_Junction_64058	intronretentionleft-Junction_64058	J002	0.0462907	8.23782	0.00410263	0.0486004	15.5002	16.9919	0.625154	chr3R	20865472	20865591	120	+	416	243	313	594	0.541	0.403	0.7162	0.6644
bai	intronretention_Junction_64058	intronretentionright-Junction_64058	J001	0.0116401	13.5666	0.000230241	0.00565938	15.644	14.5435	-0.464709	chr3R	20865543	20865606	64	+	353	360	124	300	0.5456	0.6061	0.4013	0.4249
bai	intronretention_Junction_64058	intronretentionright-Junction_64058	J002	0.0116404	13.5664	0.000230273	0.00565938	14.5923	15.6896	0.46316	chr3R	20865559	20865678	120	+	294	234	185	406	0.4544	0.3939	0.5987	0.5751	-0.16603
bai	intronretention_Junction_64060	intronretentionleft-Junction_64060	J001	0.0162139	10.7809	0.00102553	0.0174752	17.7768	16.7175	-0.44172	chr3R	20865870	20865932	63	+	528	513	409	573	0.6875	0.7555	0.5712	0.5823
bai	intronretention_Junction_64060	intronretentionleft-Junction_64060	J002	0.0162277	10.7732	0.0010298	0.0175059	14.5037	15.652	0.484939	chr3R	20865802	20865918	117	+	240	166	307	411	0.3125	0.2445	0.4288	0.4177
bai	intronretention_Junction_64060	intronretentionright-Junction_64060	J001	0.0126208	20.7892	5.12711e-06	0.000243707	17.909	16.5852	-0.55206	chr3R	20865870	20865932	63	+	528	513	409	573	0.7154	0.7623	0.5375	0.5776
bai	intronretention_Junction_64060	intronretentionright-Junction_64060	J002	0.012632	20.7744	5.1668e-06	0.000245388	14.3286	15.7961	0.619912	chr3R	20865885	20866005	121	+	210	160	352	419	0.2846	0.2377	0.4625	0.4224	-0.179975
CG11790	intronretention_Junction_64076	intronretentionleft-Junction_64076	J001	0.0759617	4.29355	0.0382571	0.217172	13.3878	14.5424	0.49263	chr3R	20874071	20874162	92	+	132	134	172	420	0.7213	0.7929	0.9247	0.8451
CG11790	intronretention_Junction_64076	intronretentionleft-Junction_64076	J002	0.0765804	4.26743	0.0388496	0.21955	9.68397	8.40915	-0.610638	chr3R	20874001	20874119	119	+	51	35	14	77	0.2787	0.2071	0.0753	0.1549
CG11790	intronretention_Junction_64076	intronretentionright-Junction_64076	J001	0.0149221	5.88685	0.0152543	0.119417	13.6501	14.2962	0.27565	chr3R	20874071	20874162	92	+	132	134	172	420	0.7416	0.7882	0.8731	0.8417
CG11790	intronretention_Junction_64076	intronretentionright-Junction_64076	J002	0.0151817	5.83838	0.0156802	0.121858	9.79842	8.71408	-0.514652	chr3R	20874115	20874225	111	+	46	36	25	79	0.2584	0.2118	0.1269	0.1583	0.157127
CG11790	intronretention_Junction_64077	intronretentionleft-Junction_64077	J001	0.0098872	7.71801	0.00546727	0.0591502	15.4346	14.6013	-0.352074	chr3R	20874325	20874385	61	+	300	247	135	404	0.6198	0.5981	0.5273	0.4687
CG11790	intronretention_Junction_64077	intronretentionleft-Junction_64077	J002	0.00989279	7.7147	0.00547729	0.0592024	13.9224	14.8007	0.373196	chr3R	20874252	20874373	122	+	184	166	121	458	0.3802	0.4019	0.4727	0.5313
CG11790	intronretention_Junction_64077	intronretentionright-Junction_64077	J001	0.00583629	6.44864	0.0111037	0.0966895	15.2981	14.7628	-0.226155	chr3R	20874325	20874385	61	+	300	247	135	404	0.7576	0.7695	0.6716	0.6871
CG11790	intronretention_Junction_64077	intronretentionright-Junction_64077	J002	0.00587008	6.43212	0.0112075	0.097085	11.3831	12.2273	0.371874	chr3R	20874338	20874456	119	+	96	74	66	184	0.2424	0.2305	0.3284	0.3129	-0.10947
gro	intronretention_Junction_64861	intronretentionleft-Junction_64861	J001	0.0686213	6.71747	0.00954731	0.0874036	11.0473	9.21571	-0.842784	chr3R	21867986	21868715	730	+	31	53	123	26	0.3229	0.53	0.2085	0.1898
gro	intronretention_Junction_64861	intronretentionleft-Junction_64861	J002	0.0682867	6.7443	0.00940477	0.0863906	11.905	13.6273	0.746462	chr3R	21867917	21868034	118	+	65	47	467	111	0.6771	0.47	0.7915	0.8102
gro	intronretention_Junction_64861	intronretentionright-Junction_64861	J001	0.0633993	4.23812	0.0395258	0.221787	10.695	9.54565	-0.528606	chr3R	21867986	21868715	730	+	31	53	123	26	0.3163	0.4015	0.2505	0.1444
gro	intronretention_Junction_64861	intronretentionright-Junction_64861	J002	0.0631292	4.25191	0.0392062	0.220753	12.4676	13.5358	0.461179	chr3R	21868668	21868785	118	+	67	79	368	154	0.6837	0.5985	0.7495	0.8556	-0.134267
gpp	intronretention_Junction_65132	intronretentionleft-Junction_65132	J001	0.0607404	9.78188	0.0017624	0.0261884	10.8058	8.95704	-0.857898	chr3R	2232813	2233198	386	+	52	37	92	35	0.4815	0.4458	0.2606	0.1464
gpp	intronretention_Junction_65132	intronretentionleft-Junction_65132	J002	0.0604705	9.81575	0.00173024	0.0258275	11.2572	12.98	0.754757	chr3R	2232745	2232861	117	+	56	46	261	204	0.5185	0.5542	0.7394	0.8536
gpp	intronretention_Junction_65132	intronretentionright-Junction_65132	J001	0.0326209	6.861	0.00880974	0.0824286	10.4842	9.22388	-0.584891	chr3R	2232813	2233198	386	+	52	37	92	35	0.4602	0.4512	0.3172	0.216
gpp	intronretention_Junction_65132	intronretentionright-Junction_65132	J002	0.0324579	6.88266	0.00870361	0.0817717	11.045	12.1608	0.493616	chr3R	2233151	2233255	105	+	61	45	198	127	0.5398	0.5488	0.6828	0.784	-0.167079
CG5938	intronretention_Junction_65750	intronretentionleft-Junction_65750	J001	0.0187215	5.56506	0.0183224	0.13516	13.414	12.5994	-0.351647	chr3R	23101507	23102013	507	+	212	136	76	180	0.7285	0.7273	0.5468	0.6429
CG5938	intronretention_Junction_65750	intronretentionleft-Junction_65750	J002	0.0188177	5.54817	0.0185	0.135889	10.2048	11.2016	0.450547	chr3R	23101440	23101555	116	+	79	51	63	100	0.2715	0.2727	0.4532	0.3571
CG5938	intronretention_Junction_65750	intronretentionright-Junction_65750	J001	0.0084465	7.76573	0.00532468	0.0582277	13.3634	12.6828	-0.293721	chr3R	23101507	23102013	507	+	212	136	76	180	0.8123	0.8095	0.7103	0.6977
CG5938	intronretention_Junction_65750	intronretentionright-Junction_65750	J002	0.00856945	7.72117	0.00545771	0.0590918	8.71372	9.94377	0.582192	chr3R	23101966	23102074	109	+	49	32	31	78	0.1877	0.1905	0.2897	0.3023	-0.147341
CG5514	intronretention_Junction_66206	intronretentionleft-Junction_66206	J001	0.0291182	9.41146	0.00215634	0.0303761	6.51597	3.94002	-1.70452	chr3R	23765369	23765427	59	+	49	43	0	4	0.3984	0.4674	INF	0.1143
CG5514	intronretention_Junction_66206	intronretentionleft-Junction_66206	J002	0.0285655	9.4705	0.00208802	0.0296487	7.26635	8.82008	0.783783	chr3R	23765299	23765417	119	+	74	49	0	31	0.6016	0.5326	INF	0.8857
CG5514	intronretention_Junction_66206	intronretentionright-Junction_66206	J001	0.116154	3.94511	0.0470079	0.246894	6.09966	4.20556	-1.25654	chr3R	23765369	23765427	59	+	49	43	0	4	0.4414	0.6324	INF	0.1818
CG5514	intronretention_Junction_66206	intronretentionright-Junction_66206	J002	0.115979	3.94861	0.0469102	0.246632	5.90772	7.63406	0.954536	chr3R	23765380	23765499	120	+	62	25	0	18	0.5586	0.3676	INF	0.8182	-0.240721
Atg14	intronretention_Junction_67605	intronretentionleft-Junction_67605	J001	0.0699762	6.34672	0.0117599	0.100155	12.5122	11.0991	-0.622669	chr3R	24943618	24943679	62	+	122	109	34	160	0.8243	0.8516	0.5231	0.7143
Atg14	intronretention_Junction_67605	intronretentionleft-Junction_67605	J002	0.0705696	6.30917	0.0120115	0.101367	7.44666	9.04213	0.795706	chr3R	24943550	24943666	117	+	26	19	31	64	0.1757	0.1484	0.4769	0.2857
Atg14	intronretention_Junction_67605	intronretentionright-Junction_67605	J001	0.0114614	8.86545	0.00290619	0.0376746	12.321	11.3936	-0.408077	chr3R	24943618	24943679	62	+	122	109	34	160	0.7052	0.6855	0.4928	0.5594
Atg14	intronretention_Junction_67605	intronretentionright-Junction_67605	J002	0.0115308	8.84254	0.00294289	0.0380722	9.66874	10.8303	0.532056	chr3R	24943632	24943753	122	+	51	50	35	126	0.2948	0.3145	0.5072	0.4406	-0.214141
Vha100-1	intronretention_Junction_67640	intronretentionleft-Junction_67640	J001	0.0155166	33.7763	6.1826e-09	7.42388e-07	16.5344	14.5615	-0.830511	chr3R	24962421	24962625	205	+	607	600	126	191	0.5626	0.6342	0.3316	0.3167
Vha100-1	intronretention_Junction_67640	intronretentionleft-Junction_67640	J002	0.015517	33.7757	6.18472e-09	7.42388e-07	15.1642	17.0905	0.807899	chr3R	24962351	24962469	119	+	472	346	254	412	0.4374	0.3658	0.6684	0.6833
Vha100-1	intronretention_Junction_67640	intronretentionright-Junction_67640	J001	0.0175072	7.04308	0.00795723	0.0769055	15.8942	15.1958	-0.29393	chr3R	24962421	24962625	205	+	607	600	126	191	0.9382	0.9539	0.9065	0.8802
Vha100-1	intronretention_Junction_67640	intronretentionright-Junction_67640	J002	0.0181471	6.93113	0.00847081	0.0802295	6.82831	8.40185	0.815459	chr3R	24962578	24962669	92	+	40	29	13	26	0.0618	0.0461	0.0935	0.1198	-0.266783
Vha100-1	intronretention_Junction_67643	intronretentionleft-Junction_67643	J001	0.0127626	18.3933	1.79691e-05	0.000693614	15.7194	14.7962	-0.389356	chr3R	24962632	24962796	165	+	546	582	121	163	0.9479	0.9557	0.8462	0.8763
Vha100-1	intronretention_Junction_67643	intronretentionleft-Junction_67643	J002	0.0132457	18.1584	2.03268e-05	0.000772051	6.38006	8.82451	1.27237	chr3R	24962586	24962680	95	+	30	27	22	23	0.0521	0.0443	0.1538	0.1237
Vha100-1	intronretention_Junction_67643	intronretentionright-Junction_67643	J001	0.0557005	5.9841	0.0144354	0.115084	16.0271	14.5003	-0.643941	chr3R	24962632	24962796	165	+	546	582	121	163	0.6424	0.6306	0.5171	0.3453
Vha100-1	intronretention_Junction_67643	intronretentionright-Junction_67643	J002	0.0557216	5.98194	0.0144531	0.115173	14.1237	15.6572	0.648666	chr3R	24962749	24962863	115	+	304	341	113	309	0.3576	0.3694	0.4829	0.6547	-0.215568
Cnx99A	intronretention_Junction_67763	intronretentionleft-Junction_67763	J001	0.0962894	5.64109	0.0175443	0.131191	20.5896	18.9139	-0.693598	chr3R	25141891	25141957	67	-	1811	1429	311	1145	0.862	0.8446	0.5554	0.7588
Cnx99A	intronretention_Junction_67763	intronretentionleft-Junction_67763	J002	0.096364	5.63685	0.0175868	0.131386	14.4944	16.1838	0.712148	chr3R	25141818	25141939	122	-	290	263	249	364	0.138	0.1554	0.4446	0.2412
Cnx99A	intronretention_Junction_67763	intronretentionright-Junction_67763	J001	0.0610706	14.9477	0.000110532	0.00313134	20.8744	18.6328	-0.927881	chr3R	25141891	25141957	67	-	1811	1429	311	1145	0.7853	0.7891	0.3912	0.5666
Cnx99A	intronretention_Junction_67763	intronretentionright-Junction_67763	J002	0.0610894	14.9432	0.000110794	0.00313625	16.3326	18.5926	0.941829	chr3R	25141910	25142030	121	-	495	382	484	876	0.2147	0.2109	0.6088	0.4334	-0.304321
Spase12	intronretention_Junction_67859	intronretentionleft-Junction_67859	J001	0.0194466	9.51759	0.00203512	0.0291154	18.5983	17.5043	-0.454834	chr3R	25316475	25316530	56	-	960	917	365	500	0.564	0.6476	0.4403	0.457
Spase12	intronretention_Junction_67859	intronretentionleft-Junction_67859	J002	0.019449	9.51655	0.00203627	0.0291246	17.1212	18.2234	0.458869	chr3R	25316404	25316523	120	-	742	499	464	594	0.436	0.3524	0.5597	0.543
Spase12	intronretention_Junction_67859	intronretentionright-Junction_67859	J001	0.0120612	18.8388	1.42243e-05	0.000571553	18.6635	17.4378	-0.509592	chr3R	25316475	25316530	56	-	960	917	365	500	0.6862	0.7383	0.5313	0.5543
Spase12	intronretention_Junction_67859	intronretentionright-Junction_67859	J002	0.0120693	18.8283	1.43033e-05	0.000573916	15.5288	16.8466	0.552445	chr3R	25316483	25316604	122	-	439	325	322	402	0.3138	0.2617	0.4687	0.4457	-0.161879
Gycalpha99B	intronretention_Junction_67974	intronretentionleft-Junction_67974	J001	0.0339534	10.0557	0.00151875	0.0234624	17.9503	19.3571	0.583809	chr3R	25511069	25511130	62	+	853	777	565	859	0.563	0.5913	0.8071	0.7164
Gycalpha99B	intronretention_Junction_67974	intronretentionleft-Junction_67974	J002	0.0339698	10.0513	0.00152244	0.023494	16.8727	15.4235	-0.607679	chr3R	25510996	25511117	122	+	662	537	135	340	0.437	0.4087	0.1929	0.2836
Gycalpha99B	intronretention_Junction_67974	intronretentionright-Junction_67974	J001	0.0175573	3.87139	0.0491159	0.252823	18.3396	18.967	0.260357	chr3R	25511069	25511130	62	+	853	777	565	859	0.6551	0.6497	0.7677	0.7035
Gycalpha99B	intronretention_Junction_67974	intronretentionright-Junction_67974	J002	0.0175733	3.86837	0.0492044	0.252967	16.1623	15.4863	-0.283986	chr3R	25511083	25511203	121	+	449	419	171	362	0.3449	0.3503	0.2323	0.2965	0.158147
Zip99C	intronretention_Junction_68139	intronretentionleft-Junction_68139	J001	0.0101815	5.17354	0.0229335	0.15571	10.1265	9.27462	-0.397329	chr3R	25690718	25690777	60	-	80	71	24	50	0.5926	0.5726	0.4444	0.4425
Zip99C	intronretention_Junction_68139	intronretentionleft-Junction_68139	J002	0.0102018	5.16995	0.0229808	0.155938	9.09649	9.97432	0.411967	chr3R	25690650	25690766	117	-	55	53	30	63	0.4074	0.4274	0.5556	0.5575
Zip99C	intronretention_Junction_68139	intronretentionright-Junction_68139	J001	0.0728996	3.87395	0.049041	0.252674	10.3752	8.99298	-0.645465	chr3R	25690718	25690777	60	-	80	71	24	50	0.4571	0.3944	0.1714	0.3247
Zip99C	intronretention_Junction_68139	intronretentionright-Junction_68139	J002	0.0726144	3.88619	0.0486847	0.251828	11.3672	12.6724	0.572672	chr3R	25690730	25690851	122	-	95	109	116	104	0.5429	0.6056	0.8286	0.6753	-0.140478
Ddc	intronretention_Junction_6824	intronretentionleft-Junction_6824	J001	0.0837074	10.7777	0.00102731	0.0174897	13.734	11.3371	-1.04319	chr2L	19119241	19119317	77	-	144	183	58	144	0.4675	0.4906	0.1245	0.2544
Ddc	intronretention_Junction_6824	intronretentionleft-Junction_6824	J002	0.0835808	10.7928	0.00101897	0.0174102	13.9914	16.3411	0.992046	chr2L	19119175	19119289	115	-	164	190	408	422	0.5325	0.5094	0.8755	0.7456
Ddc	intronretention_Junction_6824	intronretentionright-Junction_6824	J001	0.0480344	12.8823	0.000331713	0.0074984	13.5451	11.5278	-0.877651	chr2L	19119241	19119317	77	-	144	183	58	144	0.5125	0.5446	0.1946	0.3137
Ddc	intronretention_Junction_6824	intronretentionright-Junction_6824	J002	0.0479717	12.8968	0.000329149	0.00745526	13.1273	15.0739	0.829637	chr2L	19119270	19119387	118	-	137	153	240	315	0.4875	0.4554	0.8054	0.6863	-0.21295
Mgat2	intronretention_Junction_68304	intronretentionleft-Junction_68304	J001	0.0185444	8.33473	0.00388943	0.0467311	13.2129	12.27	-0.408632	chr3R	25842316	25842380	65	-	249	262	0	156	0.9121	0.9066	INF	0.7959
Mgat2	intronretention_Junction_68304	intronretentionleft-Junction_68304	J002	0.0195652	8.11505	0.00438992	0.0508779	6.24518	8.17082	1.02868	chr3R	25842263	25842364	102	-	24	27	0	40	0.0879	0.0934	INF	0.2041
Mgat2	intronretention_Junction_68304	intronretentionright-Junction_68304	J001	0.0234333	8.68121	0.00321508	0.0406417	13.3953	12.0602	-0.578837	chr3R	25842316	25842380	65	-	249	262	0	156	0.7523	0.7964	INF	0.5821
Mgat2	intronretention_Junction_68304	intronretentionright-Junction_68304	J002	0.0237097	8.6061	0.00335038	0.0419784	9.38674	11.0233	0.751094	chr3R	25842333	25842453	121	-	82	67	0	112	0.2477	0.2036	INF	0.4179	-0.212188
CG17568	intronretention_Junction_6863	intronretentionleft-Junction_6863	J001	0.171881	4.27378	0.0387048	0.218946	11.8226	9.76865	-0.927075	chr2L	19179983	19180040	58	-	161	102	29	58	0.8256	0.887	0.4462	0.7532
CG17568	intronretention_Junction_6863	intronretentionleft-Junction_6863	J002	0.173297	4.24364	0.0393976	0.221415	6.63782	8.68767	1.06074	chr2L	19179924	19180031	108	-	34	13	36	19	0.1744	0.113	0.5538	0.2468
CG17568	intronretention_Junction_6863	intronretentionright-Junction_6863	J001	0.143492	4.62985	0.0314203	0.191544	11.816	9.77701	-0.920309	chr2L	19179983	19180040	58	-	161	102	29	58	0.8519	0.8031	0.4203	0.716
CG17568	intronretention_Junction_6863	intronretentionright-Junction_6863	J002	0.144521	4.60113	0.0319509	0.193605	7.01126	9.08082	1.0455	chr2L	19179993	19180097	105	-	28	25	40	23	0.1481	0.1969	0.5797	0.284	-0.297177
CG42740	intronretention_Junction_68699	intronretentionleft-Junction_68699	J001	0.0207731	28.134	1.13202e-07	9.22762e-06	20.5108	18.6392	-0.774972	chr3R	26244745	26244814	70	-	1639	1227	546	840	0.7941	0.8433	0.5909	0.5945
CG42740	intronretention_Junction_68699	intronretentionleft-Junction_68699	J002	0.0207892	28.114	1.14375e-07	9.27008e-06	15.3513	17.3373	0.831928	chr3R	26244675	26244793	119	-	425	228	378	573	0.2059	0.1567	0.4091	0.4055
CG42740	intronretention_Junction_68699	intronretentionright-Junction_68699	J001	0.0304661	5.79556	0.0160667	0.123708	20.0793	19.0689	-0.418317	chr3R	26244745	26244814	70	-	1639	1227	546	840	0.6021	0.6909	0.4671	0.5316
CG42740	intronretention_Junction_68699	intronretentionright-Junction_68699	J002	0.0304707	5.79473	0.0160742	0.123708	18.0728	19.0917	0.422889	chr3R	26244767	26244887	121	-	1083	549	623	740	0.3979	0.3091	0.5329	0.4684	-0.194997
dj-1beta	intronretention_Junction_68928	intronretentionleft-Junction_68928	J001	0.0185684	11.9559	0.000544754	0.0107063	13.6705	12.3154	-0.585232	chr3R	26633006	26633068	63	+	123	108	139	232	0.5802	0.6171	0.4427	0.3671
dj-1beta	intronretention_Junction_68928	intronretentionleft-Junction_68928	J002	0.0185554	11.962	0.000542975	0.0106788	12.3472	13.6989	0.583496	chr3R	26632933	26633054	122	+	89	67	175	400	0.4198	0.3829	0.5573	0.6329
dj-1beta	intronretention_Junction_68928	intronretentionright-Junction_68928	J001	0.00709803	15.4002	8.69803e-05	0.00259242	13.5166	12.4746	-0.449919	chr3R	26633006	26633068	63	+	123	108	139	232	0.7235	0.7013	0.556	0.5346
dj-1beta	intronretention_Junction_68928	intronretentionright-Junction_68928	J002	0.00712014	15.3797	8.79269e-05	0.00260583	10.5328	11.9021	0.611076	chr3R	26633021	26633141	121	+	47	46	111	202	0.2765	0.2987	0.444	0.4654	-0.179177
CG12071	intronretention_Junction_68961	intronretentionleft-Junction_68961	J001	0.0147615	7.71809	0.00546703	0.0591502	13.2539	12.1797	-0.46574	chr3R	26703719	26703867	149	-	254	279	60	73	0.2943	0.3514	0.2222	0.2033
CG12071	intronretention_Junction_68961	intronretentionleft-Junction_68961	J002	0.0147291	7.73029	0.00543019	0.0589259	15.7621	16.6291	0.363421	chr3R	26703648	26703767	120	-	609	515	210	286	0.7057	0.6486	0.7778	0.7967
CG12071	intronretention_Junction_68961	intronretentionright-Junction_68961	J001	0.0377412	20.8062	5.08191e-06	0.000242517	13.9475	11.521	-1.05272	chr3R	26703719	26703867	149	-	254	279	60	73	0.3562	0.4745	0.1399	0.1674
CG12071	intronretention_Junction_68961	intronretentionright-Junction_68961	J002	0.0376872	20.8321	5.01355e-06	0.000239509	15.132	17.3688	0.937569	chr3R	26703820	26703941	122	-	459	309	369	363	0.6438	0.5255	0.8601	0.8326	-0.125037
lap	intronretention_Junction_69989	intronretentionleft-Junction_69989	J001	0.00718769	5.57784	0.0181892	0.134474	13.4409	12.8276	-0.264258	chr3R	3017400	3017456	57	+	374	270	47	99	0.751	0.75	0.6714	0.6387
lap	intronretention_Junction_69989	intronretentionleft-Junction_69989	J002	0.00725474	5.55809	0.0183955	0.135366	9.86122	10.8213	0.438439	chr3R	3017327	3017448	122	+	124	90	23	56	0.249	0.25	0.3286	0.3613
lap	intronretention_Junction_69989	intronretentionright-Junction_69989	J001	0.0276654	19.3952	1.06274e-05	0.000445591	14.014	12.2238	-0.771976	chr3R	3017400	3017456	57	+	374	270	47	99	0.7991	0.8599	0.5663	0.5858
lap	intronretention_Junction_69989	intronretentionright-Junction_69989	J002	0.0278933	19.2899	1.123e-05	0.000466731	9.00675	11.1984	1.01008	chr3R	3017409	3017526	118	+	94	44	36	70	0.2009	0.1401	0.4337	0.4142	-0.208339
CG2993	intronretention_Junction_70251	intronretentionleft-Junction_70251	J001	0.00941298	10.0351	0.00153587	0.0236459	14.3262	13.4548	-0.372085	chr3R	3632492	3632632	141	-	220	211	166	162	0.6414	0.6656	0.5443	0.4909
CG2993	intronretention_Junction_70251	intronretentionleft-Junction_70251	J002	0.00943009	10.0242	0.00154497	0.0237386	12.1977	13.1902	0.430457	chr3R	3632427	3632540	114	-	123	106	139	168	0.3586	0.3344	0.4557	0.5091
CG2993	intronretention_Junction_70251	intronretentionright-Junction_70251	J001	0.00911499	19.8894	8.20551e-06	0.000361074	14.493	13.2887	-0.514251	chr3R	3632492	3632632	141	-	220	211	166	162	0.7509	0.7404	0.5372	0.5891
CG2993	intronretention_Junction_70251	intronretentionright-Junction_70251	J002	0.00914916	19.8489	8.38131e-06	0.000367675	10.9216	12.4903	0.692694	chr3R	3632585	3632689	105	-	73	74	143	113	0.2491	0.2596	0.4628	0.4109	-0.166132
CG9667	intronretention_Junction_70636	intronretentionleft-Junction_70636	J001	0.032577	4.52046	0.0334918	0.199614	11.5047	10.6171	-0.397481	chr3R	3951665	3951725	61	-	73	58	122	65	0.7228	0.7073	0.6162	0.4924
CG9667	intronretention_Junction_70636	intronretentionleft-Junction_70636	J002	0.0327251	4.50798	0.0337371	0.2006	8.62648	9.65982	0.492748	chr3R	3951596	3951713	118	-	28	24	76	67	0.2772	0.2927	0.3838	0.5076
CG9667	intronretention_Junction_70636	intronretentionright-Junction_70636	J001	0.0114704	14.9471	0.000110566	0.00313134	11.6296	10.4293	-0.538048	chr3R	3951665	3951725	61	-	73	58	122	65	0.8202	0.8056	0.5922	0.619
CG9667	intronretention_Junction_70636	intronretentionright-Junction_70636	J002	0.0116067	14.887	0.000114147	0.00321994	7.17375	9.13892	0.986031	chr3R	3951678	3951782	105	-	16	14	84	40	0.1798	0.1944	0.4078	0.381	-0.208784
RpA-70	intronretention_Junction_70706	intronretentionleft-Junction_70706	J001	0.129739	5.4118	0.020001	0.143037	12.5201	10.7421	-0.786472	chr3R	4088395	4088473	79	-	231	206	13	80	0.5022	0.5738	0.1444	0.3587
RpA-70	intronretention_Junction_70706	intronretentionleft-Junction_70706	J002	0.129689	5.41358	0.0199807	0.142981	12.0413	13.815	0.766867	chr3R	4088325	4088443	119	-	229	153	77	143	0.4978	0.4262	0.8556	0.6413
RpA-70	intronretention_Junction_70706	intronretentionright-Junction_70706	J001	0.0683795	9.33977	0.00224234	0.0312785	12.5499	10.7505	-0.795647	chr3R	4088395	4088473	79	-	231	206	13	80	0.7241	0.7031	0.2826	0.5063
RpA-70	intronretention_Junction_70706	intronretentionright-Junction_70706	J002	0.0686166	9.31604	0.00227156	0.0315386	9.61754	11.4699	0.841735	chr3R	4088426	4088535	110	-	88	87	33	78	0.2759	0.2969	0.7174	0.4937	-0.255972
CG11753	intronretention_Junction_70918	intronretentionleft-Junction_70918	J001	0.00951993	5.86116	0.0154786	0.120675	12.5908	11.8579	-0.320304	chr3R	4479007	4479076	70	+	142	166	52	124	0.6256	0.6535	0.4906	0.5415
CG11753	intronretention_Junction_70918	intronretentionleft-Junction_70918	J002	0.00955473	5.85164	0.0155626	0.121189	10.6971	11.5529	0.382658	chr3R	4478935	4479055	121	+	85	88	54	105	0.3744	0.3465	0.5094	0.4585
CG11753	intronretention_Junction_70918	intronretentionright-Junction_70918	J001	0.0415783	4.02076	0.0449435	0.240097	12.7512	11.6625	-0.476035	chr3R	4479007	4479076	70	+	142	166	52	124	0.673	0.7793	0.619	0.5463
CG11753	intronretention_Junction_70918	intronretentionright-Junction_70918	J002	0.0417528	4.00741	0.0453007	0.241337	9.55523	10.7572	0.552209	chr3R	4479029	4479148	120	+	69	47	32	103	0.327	0.2207	0.381	0.4537	-0.14046
CG9775	intronretention_Junction_71109	intronretentionleft-Junction_71109	J001	0.0189821	8.87922	0.00288434	0.0374853	19.1305	18.0693	-0.440459	chr3R	464131	464264	134	-	952	881	456	784	0.6611	0.7163	0.5779	0.5161
CG9775	intronretention_Junction_71109	intronretentionleft-Junction_71109	J002	0.0189894	8.8761	0.00288928	0.0375199	16.3837	17.4825	0.458839	chr3R	464063	464179	117	-	488	349	333	735	0.3389	0.2837	0.4221	0.4839
CG9775	intronretention_Junction_71109	intronretentionright-Junction_71109	J001	0.00211643	26.4755	2.66904e-07	1.91985e-05	18.9871	18.2286	-0.314796	chr3R	464131	464264	134	-	952	881	456	784	0.4956	0.5092	0.3976	0.3988
CG9775	intronretention_Junction_71109	intronretentionright-Junction_71109	J002	0.00211598	26.4791	2.66407e-07	1.9187e-05	18.9537	19.6594	0.29235	chr3R	464217	464337	121	-	969	849	691	1182	0.5044	0.4908	0.6024	0.6012	-0.110288
CG8369	intronretention_Junction_71151	intronretentionleft-Junction_71151	J001	0.0160663	15.8392	6.89599e-05	0.00215465	23.004	21.5107	-0.615792	chr3R	4648388	4648444	57	+	2888	2808	116	3602	0.7578	0.7943	0.6554	0.5914
CG8369	intronretention_Junction_71151	intronretentionleft-Junction_71151	J002	0.0160714	15.8344	6.91358e-05	0.00215827	18.6519	20.1928	0.638253	chr3R	4648315	4648436	122	+	923	727	61	2489	0.2422	0.2057	0.3446	0.4086
CG8369	intronretention_Junction_71151	intronretentionright-Junction_71151	J001	0.0206028	20.8018	5.09355e-06	0.000242517	23.1927	21.3176	-0.77324	chr3R	4648388	4648444	57	+	2888	2808	116	3602	0.7562	0.8034	0.6073	0.5435
CG8369	intronretention_Junction_71151	intronretentionright-Junction_71151	J002	0.0206074	20.7974	5.10531e-06	0.000242874	18.7629	20.6765	0.792118	chr3R	4648397	4648517	121	+	931	687	75	3026	0.2438	0.1966	0.3927	0.4565	-0.209355
Karybeta3	intronretention_Junction_71242	intronretentionleft-Junction_71242	J001	0.0180143	18.3267	1.86084e-05	0.000715865	10.2853	11.8847	0.716208	chr3R	479058	479172	115	+	68	45	0	264	0.5484	0.5556	INF	0.8224
Karybeta3	intronretention_Junction_71242	intronretentionleft-Junction_71242	J002	0.0184305	18.0795	2.11869e-05	0.000798854	9.64325	7.38425	-1.11258	chr3R	478988	479106	119	+	56	36	0	57	0.4516	0.4444	INF	0.1776
Karybeta3	intronretention_Junction_71242	intronretentionright-Junction_71242	J001	0.0281587	8.32579	0.00390861	0.0468502	10.5413	11.5657	0.458818	chr3R	479058	479172	115	+	68	45	0	264	0.7816	0.7377	INF	0.9135
Karybeta3	intronretention_Junction_71242	intronretentionright-Junction_71242	J002	0.0304336	7.98131	0.00472628	0.0536856	7.08894	5.16032	-1.13549	chr3R	479125	479228	104	+	19	16	0	25	0.2184	0.2623	INF	0.0865	0.293285
CG8121	intronretention_Junction_71698	intronretentionleft-Junction_71698	J001	0.176413	4.15361	0.0415459	0.229024	9.52683	7.09496	-1.2116	chr3R	5161751	5161878	128	+	0	60	24	44	INF	0.8108	0.32	0.5641
CG8121	intronretention_Junction_71698	intronretentionleft-Junction_71698	J002	0.17698	4.14194	0.0418332	0.229865	5.50275	7.94167	1.35991	chr3R	5161682	5161799	118	+	0	14	51	34	INF	0.1892	0.68	0.4359
CG8121	intronretention_Junction_71698	intronretentionright-Junction_71698	J001	0.106322	6.48795	0.0108608	0.0953635	9.45817	7.14347	-1.15337	chr3R	5161751	5161878	128	+	0	60	24	44	INF	0.8219	0.3582	0.5432
CG8121	intronretention_Junction_71698	intronretentionright-Junction_71698	J002	0.106983	6.45681	0.0110528	0.0964524	5.27211	7.74836	1.40831	chr3R	5161831	5161952	122	+	0	13	43	37	INF	0.1781	0.6418	0.4568	-0.396656
CG16789	intronretention_Junction_72064	intronretentionleft-Junction_72064	J001	0.132346	4.57615	0.03242	0.195441	8.77626	10.6863	0.891151	chr3R	5394676	5394731	56	+	39	34	83	62	0.3223	0.3469	0.7545	0.4844
CG16789	intronretention_Junction_72064	intronretentionleft-Junction_72064	J002	0.132342	4.57625	0.032418	0.195441	10.9158	9.00791	-0.882985	chr3R	5394613	5394724	112	+	82	64	27	66	0.6777	0.6531	0.2455	0.5156
CG16789	intronretention_Junction_72064	intronretentionright-Junction_72064	J001	0.0373218	9.87236	0.0016778	0.0252078	8.83359	10.5903	0.820003	chr3R	5394676	5394731	56	+	39	34	83	62	0.2847	0.3208	0.6194	0.4806
CG16789	intronretention_Junction_72064	intronretentionright-Junction_72064	J002	0.0372471	9.88614	0.00166529	0.0250661	11.4664	9.81804	-0.746747	chr3R	5394684	5394802	119	+	98	72	51	67	0.7153	0.6792	0.3806	0.5194	0.227697
CG16817	intronretention_Junction_72178	intronretentionleft-Junction_72178	J001	0.0161568	33.5989	6.77321e-09	7.97195e-07	16.788	14.8321	-0.821931	chr3R	5504370	5504440	71	+	444	428	195	320	0.6218	0.6959	0.3869	0.3734
CG16817	intronretention_Junction_72178	intronretentionleft-Junction_72178	J002	0.0161582	33.5965	6.78142e-09	7.97195e-07	14.5375	16.5166	0.833245	chr3R	5504303	5504418	116	+	270	187	309	537	0.3782	0.3041	0.6131	0.6266
CG16817	intronretention_Junction_72178	intronretentionright-Junction_72178	J001	0.00371798	5.94077	0.0147946	0.117118	16.0405	15.582	-0.192598	chr3R	5504370	5504440	71	+	444	428	195	320	0.6568	0.6636	0.5909	0.5872
CG16817	intronretention_Junction_72178	intronretentionright-Junction_72178	J002	0.00372535	5.93509	0.0148423	0.117371	13.7727	14.3612	0.250774	chr3R	5504393	5504512	120	+	232	217	135	225	0.3432	0.3364	0.4091	0.4128	-0.191427
Syn	intronretention_Junction_72809	intronretentionleft-Junction_72809	J001	0.0963164	6.05833	0.0138408	0.111829	11.5423	9.24379	-1.04985	chr3R	6029870	6029932	63	+	100	87	24	72	0.2725	0.3222	0.1832	0.0772
Syn	intronretention_Junction_72809	intronretentionleft-Junction_72809	J002	0.0959199	6.0824	0.0136535	0.110646	14.444	16.6541	0.930442	chr3R	6029799	6029918	120	+	267	183	107	861	0.7275	0.6778	0.8168	0.9228
Syn	intronretention_Junction_72809	intronretentionright-Junction_72809	J001	0.114159	7.95846	0.00478632	0.0540118	11.7865	9.01291	-1.2678	chr3R	6029870	6029932	63	+	100	87	24	72	0.3077	0.3919	0.1791	0.0717
Syn	intronretention_Junction_72809	intronretentionright-Junction_72809	J002	0.113721	7.98782	0.00470932	0.0535464	13.9255	16.6407	1.14555	chr3R	6029885	6030000	116	+	225	135	110	932	0.6923	0.6081	0.8209	0.9283	-0.122771
CG42795	intronretention_Junction_72850	intronretentionleft-Junction_72850	J001	0.0278914	11.8974	0.000562122	0.0109569	9.89272	8.49383	-0.665986	chr3R	6065219	6065338	120	+	103	106	35	0	0.9035	0.8833	0.6364	INF
CG42795	intronretention_Junction_72850	intronretentionleft-Junction_72850	J002	0.030295	11.5138	0.000690811	0.012849	4.37927	6.86815	1.56001	chr3R	6065195	6065267	73	+	11	14	20	0	0.0965	0.1167	0.3636	INF
CG42795	intronretention_Junction_72850	intronretentionright-Junction_72850	J001	0.0310006	6.73173	0.00947124	0.086833	10.069	8.34773	-0.819418	chr3R	6065219	6065338	120	+	103	106	35	0	0.4537	0.5327	0.2672	INF
CG42795	intronretention_Junction_72850	intronretentionright-Junction_72850	J002	0.0308752	6.7503	0.00937318	0.0861533	10.1582	11.6508	0.671304	chr3R	6065291	6065412	122	+	124	93	96	0	0.5463	0.4673	0.7328	INF	-0.233425
Gel	intronretention_Junction_73325	intronretentionleft-Junction_73325	J001	0.246587	5.76551	0.0163438	0.124954	17.1497	15.204	-0.815841	chr3R	66436	66598	163	+	308	317	19	1015	0.4798	0.624	0.0823	0.3022
Gel	intronretention_Junction_73325	intronretentionleft-Junction_73325	J002	0.246511	5.76718	0.0163282	0.124869	16.4734	18.4239	0.812823	chr3R	66364	66484	121	+	334	191	212	2344	0.5202	0.376	0.9177	0.6978
Gel	intronretention_Junction_73325	intronretentionright-Junction_73325	J001	0.448447	4.48978	0.0340981	0.201987	17.2886	15.0643	-0.932689	chr3R	66436	66598	163	+	308	317	19	1015	0.6051	0.7092	0.0567	0.4009
Gel	intronretention_Junction_73325	intronretentionright-Junction_73325	J002	0.448385	4.49038	0.0340862	0.201937	15.0427	17.2664	0.932598	chr3R	66551	66671	121	+	201	130	316	1517	0.3949	0.2908	0.9433	0.5991	-0.309665
CG6621	intronretention_Junction_73419	intronretentionleft-Junction_73419	J001	0.211333	4.31109	0.0378646	0.215654	8.77619	10.9197	0.996366	chr3R	6717113	6717234	122	-	21	33	112	97	0.3443	0.541	0.875	0.6467
CG6621	intronretention_Junction_73419	intronretentionleft-Junction_73419	J002	0.212297	4.29399	0.0382473	0.217138	9.39428	7.27443	-1.05361	chr3R	6717041	6717161	121	-	40	28	16	53	0.6557	0.459	0.125	0.3533
CG6621	intronretention_Junction_73419	intronretentionright-Junction_73419	J001	0.0373289	5.25305	0.0219083	0.150891	9.29235	10.3244	0.479592	chr3R	6717113	6717234	122	-	21	33	112	97	0.5676	0.75	0.8421	0.822
CG6621	intronretention_Junction_73419	intronretentionright-Junction_73419	J002	0.0389635	5.14905	0.0232591	0.157319	7.24615	5.74698	-0.848661	chr3R	6717187	6717301	115	-	16	11	21	21	0.4324	0.25	0.1579	0.178	0.293934
Nf-YB	intronretention_Junction_7375	intronretentionleft-Junction_7375	J001	0.0164413	4.0381	0.0444838	0.238661	9.12136	10.0019	0.412833	chr2L	19736208	19736271	64	+	53	47	37	65	0.3419	0.3013	0.4933	0.4088
Nf-YB	intronretention_Junction_7375	intronretentionleft-Junction_7375	J002	0.0163166	4.05191	0.0441213	0.237724	11.4879	10.7672	-0.322146	chr2L	19736140	19736256	117	+	102	109	38	94	0.6581	0.6987	0.5067	0.5912
Nf-YB	intronretention_Junction_7375	intronretentionright-Junction_7375	J001	0.0151474	10.7966	0.00101686	0.0173848	8.87706	10.2578	0.647595	chr2L	19736208	19736271	64	+	53	47	37	65	0.3419	0.3357	0.6066	0.5078
Nf-YB	intronretention_Junction_7375	intronretentionright-Junction_7375	J002	0.0150641	10.8218	0.00100313	0.0171964	10.9577	9.72205	-0.564444	chr2L	19736224	19736345	122	+	102	93	24	63	0.6581	0.6643	0.3934	0.4922	0.135775
CG17360	intronretention_Junction_74190	intronretentionleft-Junction_74190	J001	0.0134976	21.4481	3.6353e-06	0.000184019	14.1639	12.9549	-0.518253	chr3R	7608092	7608152	61	-	266	236	70	174	0.9141	0.8872	0.7216	0.75
CG17360	intronretention_Junction_74190	intronretentionleft-Junction_74190	J002	0.0138252	21.2266	4.08059e-06	0.00020189	7.23918	9.60265	1.17018	chr3R	7608039	7608140	102	-	25	30	27	58	0.0859	0.1128	0.2784	0.25
CG17360	intronretention_Junction_74190	intronretentionright-Junction_74190	J001	0.0226281	6.25885	0.0123575	0.103657	14.0325	13.0668	-0.413977	chr3R	7608092	7608152	61	-	266	236	70	174	0.553	0.6327	0.4094	0.469
CG17360	intronretention_Junction_74190	intronretentionright-Junction_74190	J002	0.0226381	6.2568	0.0123717	0.103724	12.8066	13.7853	0.420869	chr3R	7608105	7608225	121	-	215	137	101	197	0.447	0.3673	0.5906	0.531	-0.176085
CG5608	intronretention_Junction_74850	intronretentionleft-Junction_74850	J001	0.0832057	18.3312	1.85643e-05	0.000714652	7.81221	10.8373	1.43817	chr3R	8288524	8288576	53	-	33	25	59	87	0.1919	0.2381	0.7662	0.5686
CG5608	intronretention_Junction_74850	intronretentionleft-Junction_74850	J002	0.0830161	18.3644	1.82435e-05	0.000703654	11.8813	8.93878	-1.34512	chr3R	8288471	8288572	102	-	139	80	18	66	0.8081	0.7619	0.2338	0.4314
CG5608	intronretention_Junction_74850	intronretentionright-Junction_74850	J001	0.0194136	25.9149	3.56803e-07	2.46372e-05	8.11535	10.5042	1.13419	chr3R	8288524	8288576	53	-	33	25	59	87	0.2089	0.2551	0.5043	0.5839
CG5608	intronretention_Junction_74850	intronretentionright-Junction_74850	J002	0.0193026	25.9965	3.42033e-07	2.38196e-05	11.907	9.93812	-0.885612	chr3R	8288529	8288640	112	-	125	73	58	62	0.7911	0.7449	0.4957	0.4161	0.295064
CG7381	intronretention_Junction_75138	intronretentionleft-Junction_75138	J001	0.01815	6.11668	0.0133912	0.109095	8.94514	7.68889	-0.623557	chr3R	8794005	8794065	61	-	85	43	0	36	0.5449	0.5584	INF	0.3462
CG7381	intronretention_Junction_75138	intronretentionleft-Junction_75138	J002	0.0181254	6.12071	0.0133607	0.10894	8.35909	9.50028	0.549378	chr3R	8793933	8794053	121	-	71	34	0	68	0.4551	0.4416	INF	0.6538
CG7381	intronretention_Junction_75138	intronretentionright-Junction_75138	J001	0.0498847	7.58507	0.00588537	0.0622532	9.14486	7.39393	-0.87239	chr3R	8794005	8794065	61	-	85	43	0	36	0.7798	0.6825	INF	0.4286
CG7381	intronretention_Junction_75138	intronretentionright-Junction_75138	J002	0.0509793	7.473	0.00626311	0.0650223	6.21609	8.16926	1.04473	chr3R	8794018	8794138	121	-	24	20	0	48	0.2202	0.3175	INF	0.5714	-0.220918
CG9922	intronretention_Junction_76001	intronretentionleft-Junction_76001	J001	0.0134761	8.52712	0.00349892	0.0433155	10.8949	11.9919	0.486968	chr3R	9861000	9861164	165	-	61	44	146	166	0.3389	0.4	0.4983	0.5479
CG9922	intronretention_Junction_76001	intronretentionleft-Junction_76001	J002	0.0134649	8.53127	0.00349096	0.0432546	12.7288	11.7228	-0.439716	chr3R	9860932	9861048	117	-	119	66	147	137	0.6611	0.6	0.5017	0.4521
CG9922	intronretention_Junction_76001	intronretentionright-Junction_76001	J001	0.0108634	8.30137	0.00396152	0.047303	10.9444	11.9384	0.441218	chr3R	9861000	9861164	165	-	61	44	146	166	0.4485	0.3894	0.5551	0.5907
CG9922	intronretention_Junction_76001	intronretentionright-Junction_76001	J002	0.0108742	8.29746	0.00397006	0.047385	11.9829	10.9946	-0.438193	chr3R	9861117	9861232	116	-	75	69	117	115	0.5515	0.6106	0.4449	0.4093	0.134101
spen	intronretention_Junction_7630	intronretentionleft-Junction_7630	J001	0.0213752	9.8709	0.00167914	0.0252145	18.5728	17.4663	-0.460073	chr2L	201061	201125	65	+	821	671	327	800	0.7637	0.7489	0.5609	0.6515
spen	intronretention_Junction_7630	intronretentionleft-Junction_7630	J002	0.0213939	9.86332	0.00168607	0.025295	14.6663	15.8519	0.50001	chr2L	200989	201109	121	+	254	225	256	428	0.2363	0.2511	0.4391	0.3485
spen	intronretention_Junction_7630	intronretentionright-Junction_7630	J001	0.00850427	72.2711	1.87574e-17	1.50316e-14	19.0078	17.0504	-0.813981	chr2L	201061	201125	65	+	821	671	327	800	0.8517	0.8472	0.5747	0.6245
spen	intronretention_Junction_7630	intronretentionright-Junction_7630	J002	0.00851902	72.1813	1.96311e-17	1.55132e-14	13.0722	15.579	1.06631	chr2L	201078	201198	121	+	143	121	242	481	0.1483	0.1528	0.4253	0.3755	-0.234683
Zyx	intronretention_Junction_76726	intronretentionleft-Junction_76726	J001	0.0888799	7.44895	0.00634735	0.065627	17.8172	15.6793	-0.893738	chr4	1078379	1078431	53	-	624	469	258	464	0.5407	0.5563	0.1925	0.3659
Zyx	intronretention_Junction_76726	intronretentionleft-Junction_76726	J002	0.0888549	7.45099	0.00634014	0.0655876	17.1519	19.2828	0.885604	chr4	1078313	1078427	115	-	530	374	1082	804	0.4593	0.4437	0.8075	0.6341
Zyx	intronretention_Junction_76726	intronretentionright-Junction_76726	J001	0.0275368	4.25812	0.0390632	0.220256	17.1805	16.3162	-0.36123	chr4	1078379	1078431	53	-	624	469	258	464	0.5915	0.6187	0.4243	0.5333
Zyx	intronretention_Junction_76726	intronretentionright-Junction_76726	J002	0.0275421	4.25738	0.0390801	0.220256	15.7292	16.6033	0.366471	chr4	1078384	1078505	122	-	431	289	350	406	0.4085	0.3813	0.5757	0.4667	-0.189079
CG11155	intronretention_Junction_76886	intronretentionleft-Junction_76886	J001	0.0209283	12.0116	0.000528693	0.0104702	12.7815	11.3784	-0.615028	chr4	1152584	1152709	126	+	144	134	110	55	0.4126	0.4685	0.2872	0.2209
CG11155	intronretention_Junction_76886	intronretentionleft-Junction_76886	J002	0.0208742	12.0339	0.000522405	0.0103907	13.5974	14.8311	0.525052	chr4	1152520	1152632	113	+	205	152	273	194	0.5874	0.5315	0.7128	0.7791
CG11155	intronretention_Junction_76886	intronretentionright-Junction_76886	J001	0.0153111	9.02694	0.0026603	0.0353322	12.571	11.5599	-0.443214	chr4	1152584	1152709	126	+	144	134	110	55	0.6857	0.6321	0.5189	0.4545
CG11155	intronretention_Junction_76886	intronretentionright-Junction_76886	J002	0.0153561	9.01233	0.00268164	0.0355327	10.4458	11.5786	0.507952	chr4	1152662	1152773	112	+	66	78	102	66	0.3143	0.3679	0.4811	0.5455	-0.156856
Rad23	intronretention_Junction_77850	intronretentionleft-Junction_77850	J001	0.0156471	19.5702	9.69706e-06	0.00041515	16.9313	15.4656	-0.614413	chr4	330259	330318	60	+	715	621	172	247	0.5983	0.6578	0.3927	0.4403
Rad23	intronretention_Junction_77850	intronretentionleft-Junction_77850	J002	0.0156518	19.5653	9.72214e-06	0.00041591	15.1527	16.6362	0.623008	chr4	330186	330307	122	+	480	323	266	314	0.4017	0.3422	0.6073	0.5597
Rad23	intronretention_Junction_77850	intronretentionright-Junction_77850	J001	0.00915948	6.72096	0.00952864	0.0872888	16.5233	15.8703	-0.273704	chr4	330259	330318	60	+	715	621	172	247	0.7037	0.7437	0.6347	0.6253
Rad23	intronretention_Junction_77850	intronretentionright-Junction_77850	J002	0.00917992	6.7111	0.00958146	0.0876175	13.2568	14.0595	0.343638	chr4	330271	330384	114	+	301	214	99	148	0.2963	0.2563	0.3653	0.3747	-0.172767
Pur-alpha	intronretention_Junction_78748	intronretentionleft-Junction_78748	J001	0.0109376	14.4393	0.000144749	0.00389397	14.4439	13.4637	-0.418253	chr4	581037	581095	59	+	122	136	348	195	0.8299	0.8718	0.7175	0.6915
Pur-alpha	intronretention_Junction_78748	intronretentionleft-Junction_78748	J002	0.0110429	14.3802	0.000149362	0.00400293	8.77651	10.4838	0.799251	chr4	580973	581085	113	+	25	20	137	87	0.1701	0.1282	0.2825	0.3085
Pur-alpha	intronretention_Junction_78748	intronretentionright-Junction_78748	J001	0.0193861	16.2793	5.46565e-05	0.00176092	14.7049	13.2365	-0.626578	chr4	581037	581095	59	+	122	136	348	195	0.8841	0.85	0.6591	0.7196
Pur-alpha	intronretention_Junction_78748	intronretentionright-Junction_78748	J002	0.0194918	16.2283	5.61476e-05	0.00180081	8.66982	10.7862	0.987979	chr4	581048	581159	112	+	16	24	180	76	0.1159	0.15	0.3409	0.2804	-0.21801
CG1909	intronretention_Junction_78821	intronretentionleft-Junction_78821	J001	0.0876328	11.232	0.000803983	0.014522	9.25924	6.67767	-1.31304	chr4	607719	607773	55	+	57	42	10	25	0.2969	0.3529	0.0521	0.133
CG1909	intronretention_Junction_78821	intronretentionleft-Junction_78821	J002	0.0866784	11.328	0.000763481	0.0139633	11.6398	13.9599	1.00545	chr4	607654	607767	114	+	135	77	182	163	0.7031	0.6471	0.9479	0.867
CG1909	intronretention_Junction_78821	intronretentionright-Junction_78821	J001	0.0250007	9.68003	0.00186281	0.0273096	8.76782	7.15187	-0.819378	chr4	607719	607773	55	+	57	42	10	25	0.5429	0.5385	0.2174	0.3521
CG1909	intronretention_Junction_78821	intronretentionright-Junction_78821	J002	0.0248081	9.71193	0.00183075	0.0269367	8.28621	9.68992	0.674264	chr4	607726	607832	107	+	48	36	36	46	0.4571	0.4615	0.7826	0.6479	-0.178885
CHIP	intronretention_Junction_792	intronretentionleft-Junction_792	J001	0.0279988	10.9399	0.00094114	0.0163956	13.3931	11.7771	-0.702295	chr2L	10438442	10438589	148	+	84	90	190	176	0.6043	0.566	0.3177	0.4131
CHIP	intronretention_Junction_792	intronretentionleft-Junction_792	J002	0.0279655	10.9499	0.000936095	0.0163277	12.2744	13.8524	0.680894	chr2L	10438376	10438490	115	+	55	69	408	250	0.3957	0.434	0.6823	0.5869
CHIP	intronretention_Junction_792	intronretentionright-Junction_792	J001	0.0239512	5.9	0.0151409	0.118939	13.0916	12.0683	-0.444622	chr2L	10438442	10438589	148	+	84	90	190	176	0.497	0.596	0.4213	0.3644
CHIP	intronretention_Junction_792	intronretentionright-Junction_792	J002	0.0239256	5.90462	0.0151012	0.118709	12.4742	13.4741	0.431909	chr2L	10438542	10438661	120	+	85	61	261	307	0.503	0.404	0.5787	0.6356	-0.161397
sky	intronretention_Junction_8103	intronretentionleft-Junction_8103	J001	0.0149124	7.29187	0.00692675	0.0699326	12.388	11.3639	-0.450517	chr2L	20877477	20877551	75	-	280	190	0	99	0.7388	0.7631	INF	0.5858
sky	intronretention_Junction_8103	intronretentionleft-Junction_8103	J002	0.015146	7.22844	0.00717576	0.0718296	8.92523	10.2933	0.640624	chr2L	20877411	20877525	115	-	99	59	0	70	0.2612	0.2369	INF	0.4142
sky	intronretention_Junction_8103	intronretentionright-Junction_8103	J001	0.0440242	5.50729	0.0189374	0.138139	12.4339	11.1735	-0.555327	chr2L	20877477	20877551	75	-	280	190	0	99	0.8537	0.9005	INF	0.7226
sky	intronretention_Junction_8103	intronretentionright-Junction_8103	J002	0.0454594	5.39112	0.0202395	0.144	6.62282	8.33252	0.894787	chr2L	20877504	20877622	119	-	48	21	0	38	0.1463	0.0995	INF	0.2774	-0.20146
X11Lbeta	intronretention_Junction_81130	intronretentionleft-Junction_81130	J001	0.0216156	13.9161	0.000191153	0.00484888	6.46116	4.04118	-1.59272	chrX	10523393	10524220	828	+	20	22	3	6	0.4878	0.4783	0.15	0.15
X11Lbeta	intronretention_Junction_81130	intronretentionleft-Junction_81130	J002	0.0207793	14.0491	0.000178096	0.00456654	6.63978	8.15933	0.799139	chrX	10523346	10523441	96	+	21	24	17	34	0.5122	0.5217	0.85	0.85
X11Lbeta	intronretention_Junction_81130	intronretentionright-Junction_81130	J001	0.0673369	11.2063	0.000815197	0.0146501	6.56742	3.96346	-1.71454	chrX	10523393	10524220	828	+	20	22	3	6	0.1136	0.2095	0.0265	0.0361
X11Lbeta	intronretention_Junction_81130	intronretentionright-Junction_81130	J002	0.0647222	11.4491	0.000715292	0.0132093	11.6807	13.3446	0.723946	chrX	10524173	10524277	105	+	156	83	110	160	0.8864	0.7905	0.9735	0.9639	-0.109494
Drak	intronretention_Junction_81943	intronretentionleft-Junction_81943	J001	0.0251156	5.06596	0.0244002	0.16191	11.5218	10.4781	-0.468114	chrX	11387418	11387739	322	+	132	154	33	55	0.5097	0.5923	0.3548	0.4331
Drak	intronretention_Junction_81943	intronretentionleft-Junction_81943	J002	0.0251179	5.06566	0.0244044	0.16191	10.8278	11.8447	0.452447	chrX	11387347	11387466	120	+	127	106	60	72	0.4903	0.4077	0.6452	0.5669
Drak	intronretention_Junction_81943	intronretentionright-Junction_81943	J001	0.073425	4.62828	0.0314491	0.191662	11.7426	10.2596	-0.665335	chrX	11387418	11387739	322	+	132	154	33	55	0.4177	0.5923	0.2519	0.3354
Drak	intronretention_Junction_81943	intronretentionright-Junction_81943	J002	0.0733488	4.63237	0.0313742	0.191329	11.7095	13.1546	0.62951	chrX	11387692	11387806	115	+	184	106	98	109	0.5823	0.4077	0.7481	0.6646	-0.156454
roX2	intronretention_Junction_82005	intronretentionleft-Junction_82005	J001	0.0114739	5.22823	0.0222232	0.152378	11.5983	12.1987	0.263976	chrX	11473157	11473417	261	+	158	111	67	97	0.7596	0.74	0.859	0.8435
roX2	intronretention_Junction_82005	intronretentionleft-Junction_82005	J002	0.0117751	5.18728	0.0227528	0.154852	8.18199	6.93625	-0.647416	chrX	11473106	11473205	100	+	50	39	11	18	0.2404	0.26	0.141	0.1565
roX2	intronretention_Junction_82005	intronretentionright-Junction_82005	J001	0.0935759	4.51737	0.0335523	0.199836	11.161	12.6381	0.649648	chrX	11473157	11473417	261	+	158	111	67	97	0.4922	0.4051	0.7882	0.5879
roX2	intronretention_Junction_82005	intronretentionright-Junction_82005	J002	0.0936022	4.51634	0.0335726	0.199894	11.8267	10.3362	-0.667388	chrX	11473370	11473463	94	+	163	163	18	68	0.5078	0.5949	0.2118	0.4121	0.223731
cac	intronretention_Junction_82478	intronretentionleft-Junction_82478	J001	0.011613	8.7314	0.00312777	0.0398568	10.7024	9.48878	-0.558634	chrX	11858292	11858657	366	-	71	58	49	61	0.4581	0.4113	0.2649	0.305
cac	intronretention_Junction_82478	intronretentionleft-Junction_82478	J002	0.0115252	8.76259	0.00307472	0.0393572	11.5464	12.4751	0.407446	chrX	11858219	11858340	122	-	84	83	136	139	0.5419	0.5887	0.7351	0.695
cac	intronretention_Junction_82478	intronretentionright-Junction_82478	J001	0.0111181	6.64053	0.00996845	0.090085	10.5614	9.62453	-0.431174	chrX	11858292	11858657	366	-	71	58	49	61	0.6174	0.5979	0.4804	0.4326
cac	intronretention_Junction_82478	intronretentionright-Junction_82478	J002	0.0111364	6.63616	0.00999292	0.0902488	9.19324	10.1947	0.467271	chrX	11858610	11858726	117	-	44	39	53	80	0.3826	0.4021	0.5196	0.5674	-0.127633
futsch	intronretention_Junction_83797	intronretentionleft-Junction_83797	J001	0.0281029	5.23606	0.0221233	0.151889	9.65933	8.45641	-0.575853	chrX	1308718	1321707	12990	+	79	79	17	29	0.3762	0.4759	0.2394	0.2871
futsch	intronretention_Junction_83797	intronretentionleft-Junction_83797	J002	0.027946	5.25264	0.0219135	0.150891	10.6351	11.6314	0.445367	chrX	1308646	1308766	121	+	131	87	54	72	0.6238	0.5241	0.7606	0.7129
futsch	intronretention_Junction_83797	intronretentionright-Junction_83797	J001	0.024618	8.71247	0.00316041	0.0401111	9.69262	8.42569	-0.606515	chrX	1308718	1321707	12990	+	79	79	17	29	0.7822	0.7524	0.4595	0.6042
futsch	intronretention_Junction_83797	intronretentionright-Junction_83797	J002	0.0252869	8.62256	0.00332024	0.0416564	6.32155	8.00144	0.899652	chrX	1321660	1321777	118	+	22	26	20	19	0.2178	0.2476	0.5405	0.3958	-0.161748
REG	intronretention_Junction_83830	intronretentionleft-Junction_83830	J001	0.00652419	20.8918	4.85972e-06	0.000234506	12.7141	11.3652	-0.591649	chrX	13106991	13107187	197	+	101	139	71	128	0.5976	0.6017	0.408	0.3914
REG	intronretention_Junction_83830	intronretentionleft-Junction_83830	J002	0.00652106	20.8961	4.84886e-06	0.000234198	11.374	12.7209	0.590698	chrX	13106920	13107039	120	+	68	92	103	199	0.4024	0.3983	0.592	0.6086
REG	intronretention_Junction_83830	intronretentionright-Junction_83830	J001	0.0304971	4.30237	0.0380592	0.216414	12.5218	11.5505	-0.425991	chrX	13106991	13107187	197	+	101	139	71	128	0.6966	0.7853	0.6455	0.5766
REG	intronretention_Junction_83830	intronretentionright-Junction_83830	J002	0.0306927	4.28258	0.0385049	0.218165	9.0555	10.2107	0.540336	chrX	13107140	13107259	120	+	44	38	39	94	0.3034	0.2147	0.3545	0.4234	-0.176768
Graf	intronretention_Junction_88285	intronretentionleft-Junction_88285	J001	0.0341594	12.5883	0.000388178	0.00837548	5.91949	2.73732	-2.4867	chrX	15648448	15648517	70	-	33	32	2	0	0.569	0.64	0.1053	INF
Graf	intronretention_Junction_88285	intronretentionleft-Junction_88285	J002	0.0342603	12.5784	0.000390223	0.00840367	4.96682	7.09055	1.26511	chrX	15648389	15648496	108	-	25	18	17	0	0.431	0.36	0.8947	INF
Graf	intronretention_Junction_88285	intronretentionright-Junction_88285	J001	0.0270812	20.1819	7.04167e-06	0.000319497	6.46631	2.45925	-3.12755	chrX	15648448	15648517	70	-	33	32	2	0	0.55	0.5818	0.0645	INF
Graf	intronretention_Junction_88285	intronretentionright-Junction_88285	J002	0.0265804	20.2864	6.66715e-06	0.000304447	5.81309	7.99421	1.19532	chrX	15648470	15648578	109	-	27	23	29	0	0.45	0.4182	0.9355	INF	-0.371629
UBL3	intronretention_Junction_88533	intronretentionleft-Junction_88533	J001	0.00823451	21.9696	2.77006e-06	0.000145789	19.1393	18.018	-0.465409	chrX	15744743	15745119	377	-	1051	918	496	617	0.5765	0.6262	0.4429	0.4364
UBL3	intronretention_Junction_88533	intronretentionleft-Junction_88533	J002	0.00823524	21.9679	2.77244e-06	0.000145789	17.7272	18.8612	0.471114	chrX	15744672	15744791	120	-	772	548	624	797	0.4235	0.3738	0.5571	0.5636
UBL3	intronretention_Junction_88533	intronretentionright-Junction_88533	J001	0.020513	4.73406	0.0295709	0.183267	18.9948	18.1676	-0.343337	chrX	15744743	15745119	377	-	1051	918	496	617	0.5362	0.5866	0.4092	0.4866
UBL3	intronretention_Junction_88533	intronretentionright-Junction_88533	J002	0.0205133	4.73398	0.0295723	0.183267	18.1515	18.9789	0.343443	chrX	15745072	15745193	122	-	909	647	716	651	0.4638	0.4134	0.5908	0.5134	-0.125106
shi	intronretention_Junction_88700	intronretentionleft-Junction_88700	J001	0.0366871	5.67956	0.0171637	0.129278	5.6701	3.84776	-1.28274	chrX	15786614	15786859	246	+	0	16	7	8	INF	0.3333	0.1228	0.129
shi	intronretention_Junction_88700	intronretentionleft-Junction_88700	J002	0.0326249	5.93026	0.014883	0.117595	7.47017	8.49113	0.516327	chrX	15786571	15786662	92	+	0	32	50	54	INF	0.6667	0.8772	0.871
shi	intronretention_Junction_88700	intronretentionright-Junction_88700	J001	0.0382614	6.26624	0.012306	0.103347	5.6672	3.85119	-1.27814	chrX	15786614	15786859	246	+	0	16	7	8	INF	0.5161	0.2	0.2105
shi	intronretention_Junction_88700	intronretentionright-Junction_88700	J002	0.0351043	6.45527	0.0110624	0.0965129	5.51232	6.85515	0.783148	chrX	15786812	15786907	96	+	0	15	28	30	INF	0.4839	0.8	0.7895	-0.169314
shi	intronretention_Junction_88712	intronretentionleft-Junction_88712	J001	0.0305116	7.17359	0.00739844	0.0732723	15.8218	14.6922	-0.476416	chrX	15790337	15790397	61	+	354	278	167	364	0.6667	0.7316	0.4827	0.5769
shi	intronretention_Junction_88712	intronretentionleft-Junction_88712	J002	0.0305395	7.16809	0.00742118	0.073408	13.0166	14.2027	0.508128	chrX	15790268	15790385	118	+	177	102	179	267	0.3333	0.2684	0.5173	0.4231
shi	intronretention_Junction_88712	intronretentionright-Junction_88712	J001	0.0120326	8.99583	0.00270596	0.0357697	15.6926	14.8385	-0.360164	chrX	15790337	15790397	61	+	354	278	167	364	0.6568	0.6967	0.517	0.5705
shi	intronretention_Junction_88712	intronretentionright-Junction_88712	J002	0.0120498	8.98699	0.00271908	0.0358534	13.2163	14.1724	0.409133	chrX	15790350	15790469	120	+	185	121	156	274	0.3432	0.3033	0.483	0.4295	-0.157212
Ranbp16	intronretention_Junction_88820	intronretentionleft-Junction_88820	J001	0.0274218	13.7974	0.000203622	0.00509975	12.9125	11.1813	-0.759441	chrX	15823291	15823372	82	-	183	190	47	82	0.3617	0.4645	0.2	0.2141
Ranbp16	intronretention_Junction_88820	intronretentionleft-Junction_88820	J002	0.0273644	13.8202	0.000201158	0.0050531	14.1233	15.6552	0.648011	chrX	15823218	15823339	122	-	323	219	188	301	0.6383	0.5355	0.8	0.7859
Ranbp16	intronretention_Junction_88820	intronretentionright-Junction_88820	J001	0.0221169	23.1532	1.49595e-06	8.67638e-05	13.0729	11.0284	-0.897066	chrX	15823291	15823372	82	-	183	190	47	82	0.532	0.6271	0.2956	0.2908
Ranbp16	intronretention_Junction_88820	intronretentionright-Junction_88820	J002	0.0221011	23.1652	1.48662e-06	8.63103e-05	12.0115	13.9362	0.83175	chrX	15823325	15823435	111	-	161	113	112	200	0.468	0.3729	0.7044	0.7092	-0.181125
CG34015	intronretention_Junction_89763	intronretentionleft-Junction_89763	J001	0.00888926	11.6408	0.000645215	0.012168	13.1169	12.2489	-0.376506	chrX	16341731	16341803	73	-	216	171	84	97	0.7826	0.8066	0.6562	0.6424
CG34015	intronretention_Junction_89763	intronretentionleft-Junction_89763	J002	0.00900294	11.5842	0.000665146	0.0124777	8.82212	10.2495	0.670311	chrX	16341658	16341779	122	-	60	41	44	54	0.2174	0.1934	0.3438	0.3576
CG34015	intronretention_Junction_89763	intronretentionright-Junction_89763	J001	0.0330366	8.81405	0.0029892	0.0385137	13.4176	11.9737	-0.626384	chrX	16341731	16341803	73	-	216	171	84	97	0.6034	0.6813	0.3818	0.4826
CG34015	intronretention_Junction_89763	intronretentionright-Junction_89763	J002	0.0330589	8.80934	0.00299693	0.0385761	11.5447	13.0158	0.642501	chrX	16341756	16341877	122	-	142	80	136	104	0.3966	0.3187	0.6182	0.5174	-0.201894
CG9125	intronretention_Junction_90267	intronretentionleft-Junction_90267	J001	0.0320972	3.96038	0.0465831	0.245479	9.26777	8.08538	-0.576065	chrX	16696502	16696588	87	-	0	50	64	39	INF	0.7353	0.5	0.5821
CG9125	intronretention_Junction_90267	intronretentionleft-Junction_90267	J002	0.0324133	3.93864	0.047189	0.247412	6.3542	7.80596	0.781724	chrX	16696433	16696550	118	-	0	18	64	28	INF	0.2647	0.5	0.4179
CG9125	intronretention_Junction_90267	intronretentionright-Junction_90267	J001	0.0180262	9.43919	0.00212397	0.0300324	9.4184	7.88033	-0.750857	chrX	16696502	16696588	87	-	0	50	64	39	INF	0.7143	0.4354	0.4535
CG9125	intronretention_Junction_90267	intronretentionright-Junction_90267	J002	0.0180252	9.43942	0.00212371	0.0300324	6.76461	8.57834	0.937173	chrX	16696541	16696647	107	-	0	20	83	47	INF	0.2857	0.5646	0.5465	-0.24547
Adar	intronretention_Junction_90324	intronretentionleft-Junction_90324	J001	0.0103744	26.1166	3.21406e-07	2.26045e-05	11.5408	9.47703	-0.939025	chrX	1674277	1674362	86	+	114	94	57	29	0.5112	0.5434	0.2522	0.2959
Adar	intronretention_Junction_90324	intronretentionleft-Junction_90324	J002	0.0103264	26.1744	3.11933e-07	2.20583e-05	11.2051	12.8628	0.727366	chrX	1674210	1674325	116	+	109	79	169	69	0.4888	0.4566	0.7478	0.7041
Adar	intronretention_Junction_90324	intronretentionright-Junction_90324	J001	0.0323311	4.53698	0.0331701	0.198389	11.124	9.95651	-0.53018	chrX	1674277	1674362	86	+	114	94	57	29	0.5846	0.6667	0.4101	0.5273
Adar	intronretention_Junction_90324	intronretentionright-Junction_90324	J002	0.0323898	4.53113	0.0332837	0.198902	9.56416	10.7659	0.551933	chrX	1674315	1674431	117	+	81	47	82	26	0.4154	0.3333	0.5899	0.4727	-0.191668
CG15814	intronretention_Junction_91333	intronretentionleft-Junction_91333	J001	0.0214078	6.55839	0.0104391	0.093067	14.0374	13.1641	-0.374137	chrX	17742794	17742850	57	-	155	141	176	233	0.8757	0.8545	0.7928	0.7281
CG15814	intronretention_Junction_91333	intronretentionleft-Junction_91333	J002	0.0216995	6.50571	0.0107529	0.0947373	8.10988	9.46823	0.658422	chrX	17742731	17742842	112	-	22	24	46	87	0.1243	0.1455	0.2072	0.2719
CG15814	intronretention_Junction_91333	intronretentionright-Junction_91333	J001	0.022011	12.3985	0.000429678	0.00898801	14.2968	12.9083	-0.594924	chrX	17742794	17742850	57	-	155	141	176	233	0.5805	0.6812	0.4356	0.4088
CG15814	intronretention_Junction_91333	intronretentionright-Junction_91333	J002	0.0220064	12.4005	0.000429224	0.00898541	12.5521	13.9656	0.608284	chrX	17742803	17742922	120	-	112	66	228	337	0.4195	0.3188	0.5644	0.5912	-0.200484
nAChRalpha7	intronretention_Junction_92957	intronretentionleft-Junction_92957	J001	0.00888642	11.6381	0.000646155	0.0121776	19.5989	18.7984	-0.33171	chrX	19223753	19223821	69	-	1163	929	586	946	0.7237	0.7634	0.6294	0.644
nAChRalpha7	intronretention_Junction_92957	intronretentionleft-Junction_92957	J002	0.00889471	11.6293	0.000649224	0.0122274	15.9415	16.8473	0.379247	chrX	19223680	19223801	122	-	444	288	345	523	0.2763	0.2366	0.3706	0.356
nAChRalpha7	intronretention_Junction_92957	intronretentionright-Junction_92957	J001	0.020718	9.35216	0.00222723	0.0311664	19.7542	18.6407	-0.461447	chrX	19223753	19223821	69	-	1163	929	586	946	0.7206	0.7321	0.5347	0.6248
nAChRalpha7	intronretention_Junction_92957	intronretentionright-Junction_92957	J002	0.0207271	9.3484	0.0022318	0.0311813	16.3747	17.533	0.483662	chrX	19223774	19223895	122	-	451	340	510	568	0.2794	0.2679	0.4653	0.3752	-0.145351
CG17065	intronretention_Junction_94421	intronretentionleft-Junction_94421	J001	0.0125407	4.92661	0.0264462	0.170293	14.4675	15.099	0.267334	chrX	20126107	20126156	50	-	316	266	109	333	0.6019	0.5496	0.7032	0.6594
CG17065	intronretention_Junction_94421	intronretentionleft-Junction_94421	J002	0.0125627	4.92121	0.0265289	0.170521	13.4405	12.7192	-0.311053	chrX	20126034	20126155	122	-	209	218	46	172	0.3981	0.4504	0.2968	0.3406
CG17065	intronretention_Junction_94421	intronretentionright-Junction_94421	J001	0.00644952	7.08963	0.00775314	0.0755878	14.5141	15.0854	0.241794	chrX	20126107	20126156	50	-	316	266	109	333	0.6681	0.6873	0.7569	0.7726
CG17065	intronretention_Junction_94421	intronretentionright-Junction_94421	J002	0.00648779	7.06864	0.0078445	0.0762465	12.0334	11.1421	-0.39437	chrX	20126109	20126224	116	-	157	121	35	98	0.3319	0.3127	0.2431	0.2274	0.111455
Syt1	intronretention_Junction_9679	intronretentionleft-Junction_9679	J001	0.0199155	186.712	1.65942e-42	1.5736e-38	13.8763	5.89104	-3.82176	chr2L	2772450	2785077	12628	-	464	377	8	4	0.1524	0.1764	0.006	0.002
Syt1	intronretention_Junction_9679	intronretentionleft-Junction_9679	J002	0.0198162	187.316	1.22539e-42	1.39442e-38	19.506	24.1991	1.93665	chr2L	2772380	2772498	119	-	2580	1760	1336	2044	0.8476	0.8236	0.994	0.998
Syt1	intronretention_Junction_9679	intronretentionright-Junction_9679	J001	0.14651	26.9884	2.0468e-07	1.52032e-05	12.3809	7.12605	-2.47953	chr2L	2772450	2785077	12628	-	464	377	8	4	0.6237	0.6568	0.127	0.0263
Syt1	intronretention_Junction_9679	intronretentionright-Junction_9679	J002	0.146596	26.9748	2.06123e-07	1.52507e-05	10.5218	15.8019	2.28526	chr2L	2785030	2785145	116	-	280	197	55	148	0.3763	0.3432	0.873	0.9737	-0.146788
RpS21	intronretention_Junction_9790	intronretentionleft-Junction_9790	J001	0.00288368	63.4578	1.63842e-15	9.05061e-13	23.4547	22.3077	-0.472714	chr2L	2856568	2856629	62	+	4422	4028	1067	2086	0.4807	0.5057	0.3401	0.3361
RpS21	intronretention_Junction_9790	intronretentionleft-Junction_9790	J002	0.00288352	63.4608	1.6359e-15	9.05061e-13	23.5506	24.6573	0.45573	chr2L	2856496	2856616	121	+	4778	3937	2070	4120	0.5193	0.4943	0.6599	0.6639
RpS21	intronretention_Junction_9790	intronretentionright-Junction_9790	J001	0.0278163	71.8413	2.33215e-17	1.80107e-14	24.6627	21.087	-1.47381	chr2L	2856568	2856629	62	+	4422	4028	1067	2086	0.8563	0.8402	0.3638	0.4658
RpS21	intronretention_Junction_9790	intronretentionright-Junction_9790	J002	0.0278198	71.8326	2.34247e-17	1.80107e-14	18.6559	22.2713	1.49479	chr2L	2856582	2856704	123	+	742	766	1866	2392	0.1437	0.1598	0.6362	0.5342	-0.225119
RpS25	intronretention-Junction_73555	intronretentionshort-Junction_73555	J001	0.00630667	33.6654	6.54532e-09	7.74239e-07	14.6075	13.0282	-0.675034	chr3R	7041517	7041540	24	-	357	291	35	188	0.5312	0.5043	0.2893	0.3107
RpS25	intronretention-Junction_73555	intronretentionshort-Junction_73555	J002	0.00630056	33.6839	6.48337e-09	7.70114e-07	14.3607	15.732	0.579298	chr3R	7041503	7041555	53	-	315	286	86	417	0.4688	0.4957	0.7107	0.6893	-0.217791

## Sheet: AS MXE events
Gene	AS_event_ID	AS_structure_ID	sub_junction_ID	sub-junction_dispersion_estimate	LRT_statistic-full_vs_reduced	LRT_p_value-full_vs_reduced	BH_adjusted_p-values	DN1	LNd	fitting_parameter_log2fold_change_LNd_DN1	sub_junction_chr	sub_junction_start_coor	sub_junction_end_coor	sub_junction_size	sub_junction_strand	raw_count.DN1_A	raw_count.DN1_B	raw_count.LNd_A	raw_count.LNd_B	percentage_usage.DN1_A	percentage_usage.DN1_B	percentage_usage.LNd_A	percentage_usage.LNd_B	deltaPSI
Gs1l	5_Junction_10867_Junction_10868*3_Junction_10869_Junction_10870	3_Junction_10869_Junction_10870	J001	0.0709464	2.31118	0.128447	0.440202	7.7313	8.89266	0.576516	chr2L	4456075	4456384	310	-	21	26	24	73	0.0938	0.1421	0.1472	0.258	-0.08465
Gs1l	5_Junction_10867_Junction_10868*3_Junction_10869_Junction_10870	3_Junction_10869_Junction_10870	J002	0.070255	2.33069	0.126845	0.437495	14.1399	13.1344	-0.430579	chr2L	4456332	4456384	53	-	203	157	139	210	0.9062	0.8579	0.8528	0.742	0.08465
Gs1l	5_Junction_10867_Junction_10868*3_Junction_10869_Junction_10870	5_Junction_10867_Junction_10868	J001	0.00877339	6.3191	0.0119445	0.100966	9.79273	10.7344	0.43104	chr2L	4455738	4455855	118	-	65	60	38	91	0.3299	0.3571	0.475	0.4691	-0.12855
Gs1l	5_Junction_10867_Junction_10868*3_Junction_10869_Junction_10870	5_Junction_10867_Junction_10868	J002	0.00872743	6.33248	0.0118546	0.100565	11.8737	11.1039	-0.341315	chr2L	4455738	4456112	375	-	132	108	42	103	0.6701	0.6429	0.525	0.5309	0.12855

## Sheet: Notes
See https://github.com/qqwang-berkeley/JUM/wiki/0.c-Output-files for a detailed explanation of the JUM output
Differentially spliced AS events in DN1 neurons compared to LNd neurons, in five conventionally recognized AS categories: cassette exon, A5SS (alternative 5' splice site), A3SS (alternative 3' splice site), intron retention and MXE (mutually exclusively spliced exons)
1) Each tab represents the differentially spliced AS events in each AS pattern category
2) Each spreadsheet contains the following information for each AS junction:
Gene	The gene that the AS event is associated with.
AS event ID	The AS event ID
AS structure ID	The AS structures that the specific AS event covers.
sub_junction ID	the sub_AS_junctions that each AS structure includes from the specific AS event.
	The first four columns specify the ID of the AS event, the gene it is associated with, and the basic structure of the AS event in terms of JUM definition (refer to the JUM paper for details). In JUM, each AS event will contain several AS_structures and each AS_structure contains several sub_AS_junctions.
	Each cassette exon AS event, intron retention event with intron size larger than read length, and MXE AS event has two AS structures, and each AS structure has two sub-AS-junctions. As a result each AS event will have four lines in the final output specifying the differential splicing and structure of the AS event.
	Each intron retention event with intron size smaller than the read length has one AS structure that has two sub-AS-junctions. As a result each of these small intron retention AS event will have two lines in the final output specifying the differential splicing and structure of the AS events.
	Each A5SS and A3SS AS events has one AS structure and each AS structure has several sub-AS-junctions, depending on how many alternative 5' or 3' splice sites the AS event covers. As a result each A5SS and A3SS AS event will have multiple lines in the final output specifying the differential splicing and structure of the AS event.
sub-junction_dispersion_estimate	The estimated dispersion parameter when modeling the count data as negative binomial distributions. Each sub_AS_junction receives one dispersion parameter. This is for monitoring purpose and users can ignore this information.
LRT_statistic-full_vs_reduced	The statistic calculated to perform a statistic test for differential AS between two conditions, checking whether the corresponding sub_AS_junction is differentially spliced between the two conditions under comparison. This is calculated from comparing two generalized linear models. Monitoring purpose only. Users can skip this information.
LRT_p_value-full_vs_reduced	The pvalue of the statistical test for differential AS analysis. This is to test whether the corresponding sub_AS_junction is significantly differentially spliced between the two conditions under comparison.
BH_adjusted_p-values	Corrected pvalue for differential AS analysis between conditions
DN1
LNd
fitting_parameter_log2fold_change_LNd_DN1	Columns 9-11 all contain intermediate information calculated during the generalized linear model fitting for differential AS analysis. Users can skip this information.
sub_junction_chr
sub_junction_start_coor
sub_junction_end_coor
sub_junction_size
sub_junction_strand	Columns 12-16 specify the chromosome coordinates, strand, size, etc. information of the specific sub_AS_junction.
raw_count.DN1_A
raw_count.DN1_B
raw_count.LNd_A
raw_count.LNd_B	The raw read counts of reads that mapped to the sub_AS_junction in each of the neuron group sample replicates.
percentage_usage.DN1_A
percentage_usage.DN1_B
percentage_usage.LNd_A
percentage_usage.LNd_B	The percentage usage of that sub_AS_junction in the AS structure in each of the neuron group sample replicates. If the sub_AS_junction is significantly differentially spliced between two neuron groups, users can detect a significant difference in the percentage usage between the two neuron groups
delta Percent spliced In (deltaPSI)	This column describes the level of changes of that significantly differentially spliced AS event between two neuron groups.
	For a cassette exon event, each AS event contains two AS_structures that include four sub_AS_junctions in total. So each cassette exon AS event will have four lines in the cassette exon output file. One deltaPSI value will be calculated for each cassette exon AS event (aka, every four lines). deltaPSI here is calculated as the difference in the ratio of exon_inclusion_isoform between DN1 and LNd …
	deltaPSI = exon_inclusion_isoform \ (exon_inclusion_isoform + exon_exclusion_isoform) (under DN1) - exon_inclusion_isoform \ (exon_inclusion_isoform + exon_exclsion_isoform) (under LNd).
	For an intron retention event, each AS event contains either two AS_structures with four sub_AS_junctions (when the intron size is longer than the RNA-seq read length) and so four lines in the intron_retention output file, or one AS_Structure and two sub_AS_junctions (when the intron size is smaller than the RNA-seq read length) and so two lines in the output file . One deltaPSI value is calculat…
	deltaPSI = intron_inclusion_isoform / (intron_inclusion_isoform+intron_exclusion_isoform) (under DN1) - intron_inclusion_isoform / (intron_inclusion_isoform+intron_exclusion_isoform) (under LNd)
	For an A5SS or A3SS, each AS event contains one AS structure and several sub_AS_junctions, depending on how many alternative 5'/3' splice sites are there. One deltaPSI value is calculated for EACH sub_AS_junction (so, every line). Here deltaPSI is calculated as the change in the percentage of usage for each sub_AS_junctionbetween DN1 and LNd samples:
	deltaPSI = sub_AS_junction_i / (sub_AS_junction_1+sub_AS_junction_2+ ... +sub_AS_junction_i+ ...+sub_AS_junction_n) (under DN1) - sub_AS_junction_i / (sub_AS_junction_1+sub_AS_junction_2+ ... + sub_AS_junction_i+...+sub_AS_junction_n) (under LNd). It is calculated this way because A5SS and A3SS events usually have more than two alternative splicing isoforms (not like cassette exon and intron rete…
