# Supplementary material for: Striking circadian neuron diversity and cycling of Drosophila alternative splicing
Source: eLife journal article supplement (doi:10.7554/elife.35618), 2018-06-04
Supplement: supp [file elife-35618-supp-v1.zip › elife_poa_e35618_Figure_3_source_data_5.xlsx]

## Sheet: AS cassette exon events
Gene	AS_event_ID	AS_structure_ID	sub_junction_ID	sub-junction_dispersion_estimate	LRT_statistic-full_vs_reduced	LRT_p_value-full_vs_reduced	BH_adjusted_p-values	LNd	LNv	fitting_parameter_log2fold_change_LNv_LNd	sub_junction_chr	sub_junction_start_coor	sub_junction_end_coor	sub_junction_size	sub_junction_strand	raw_count.LNd_A	raw_count.LNd_B	raw_count.LNv_A	raw_count.LNv_B	percentage_usage.LNd_A	percentage_usage.LNd_B	percentage_usage.LNv_A	percentage_usage.LNv_B	deltaPSI
Trf2	3_Junction_102362_Junction_102608*5_Junction_102361_Junction_102362	3_Junction_102362_Junction_102608	J001	0.0526736	19.2444	1.15008e-05	0.000409478	0.847752	1.46784	2.23083	chrX	8304722	8317215	12494	+	1	4	95	39	0.0385	0.0741	0.4545	0.3305
Trf2	3_Junction_102362_Junction_102608*5_Junction_102361_Junction_102362	3_Junction_102362_Junction_102608	J002	0.0520514	19.3536	1.08612e-05	0.000393215	1.96687	1.61636	-1.18405	chrX	8312459	8317215	4757	+	25	50	114	79	0.9615	0.9259	0.5455	0.6695
Trf2	3_Junction_102362_Junction_102608*5_Junction_102361_Junction_102362	5_Junction_102361_Junction_102362	J001	0.0407586	30.5769	3.20893e-08	2.33198e-06	2.61522	2.32114	-0.980285	chrX	8304722	8312382	7661	+	142	240	673	179	0.993	0.9836	0.8763	0.8211
Trf2	3_Junction_102362_Junction_102608*5_Junction_102361_Junction_102362	5_Junction_102361_Junction_102362	J002	0.0406124	30.6276	3.12617e-08	2.28015e-06	0.800225	1.52085	2.59852	chrX	8304722	8317215	12494	+	1	4	95	39	0.007	0.0164	0.1237	0.1789	0.109733
pog	3_Junction_10978_Junction_10979*5_Junction_10977_Junction_10978	3_Junction_10978_Junction_10979	J001	0.0602935	15.0334	0.000105623	0.00260293	1.90505	2.22312	1.06603	chr2L	4874169	4874885	717	+	46	95	249	110	0.4035	0.5	0.8384	0.7285
pog	3_Junction_10978_Junction_10979*5_Junction_10977_Junction_10978	3_Junction_10978_Junction_10979	J002	0.0596095	15.1759	9.79459e-05	0.00244705	1.96359	1.61541	-1.17626	chr2L	4874562	4874885	324	+	68	95	48	41	0.5965	0.5	0.1616	0.2715
pog	3_Junction_10978_Junction_10979*5_Junction_10977_Junction_10978	5_Junction_10977_Junction_10978	J001	0.0978635	6.8133	0.00904816	0.0844269	1.89279	1.60797	-0.963589	chr2L	4874169	4874540	372	+	63	68	48	45	0.578	0.4172	0.1616	0.2903
pog	3_Junction_10978_Junction_10979*5_Junction_10977_Junction_10978	5_Junction_10977_Junction_10978	J002	0.0987608	6.75879	0.0093287	0.0860366	1.93135	2.19778	0.892859	chr2L	4874169	4874885	717	+	46	95	249	110	0.422	0.5828	0.8384	0.7097	0.32743
CG4495	3_Junction_12669_Junction_12670*5_Junction_12667_Junction_12669	3_Junction_12669_Junction_12670	J001	0.215705	9.41865	0.00214789	0.0285506	1.74487	2.13228	1.30247	chr2L	7184203	7184613	411	+	25	78	150	126	0.2809	0.5306	0.7812	0.9197
CG4495	3_Junction_12669_Junction_12670*5_Junction_12667_Junction_12669	3_Junction_12669_Junction_12670	J002	0.215063	9.44377	0.00211867	0.0282331	1.84294	1.44149	-1.36591	chr2L	7184394	7184613	220	+	64	69	42	11	0.7191	0.4694	0.2188	0.0803
CG4495	3_Junction_12669_Junction_12670*5_Junction_12667_Junction_12669	5_Junction_12667_Junction_12669	J001	0.276768	7.04336	0.00795596	0.0769772	1.88756	1.51314	-1.26993	chr2L	7184203	7184384	182	+	67	77	52	12	0.7283	0.4968	0.2574	0.087
CG4495	3_Junction_12669_Junction_12670*5_Junction_12667_Junction_12669	5_Junction_12667_Junction_12669	J002	0.277575	7.02459	0.00803977	0.077507	1.75482	2.12251	1.23612	chr2L	7184203	7184613	411	+	25	78	150	126	0.2717	0.5032	0.7426	0.913	0.47596
Opa1	3_Junction_15204_Junction_15205*5_Junction_15203_Junction_15204	3_Junction_15204_Junction_15205	J001	0.030224	4.24754	0.0393072	0.240014	1.81536	1.95063	0.455348	chr2R	10121847	10122196	350	-	58	68	77	105	0.2397	0.3417	0.399	0.443
Opa1	3_Junction_15204_Junction_15205*5_Junction_15203_Junction_15204	3_Junction_15204_Junction_15205	J002	0.0307212	4.19511	0.0405407	0.245566	2.20455	2.08586	-0.397129	chr2R	10122064	10122196	133	-	184	131	116	132	0.7603	0.6583	0.601	0.557
Opa1	3_Junction_15204_Junction_15205*5_Junction_15203_Junction_15204	5_Junction_15203_Junction_15204	J001	0.0394893	2.63553	0.104497	0.459657	1.93746	1.83269	-0.352635	chr2R	10121847	10121946	100	-	90	73	45	100	0.6081	0.5177	0.3689	0.4878
Opa1	3_Junction_15204_Junction_15205*5_Junction_15203_Junction_15204	5_Junction_15203_Junction_15204	J002	0.0394763	2.63614	0.104457	0.459656	1.83057	1.93543	0.352976	chr2R	10121847	10122196	350	-	58	68	77	105	0.3919	0.4823	0.6311	0.5122	0.105202
CG9646	3_Junction_17812_Junction_17813*5_Junction_17811_Junction_17812	3_Junction_17812_Junction_17813	J001	0.0242397	12.5789	0.000390119	0.0074052	2.81424	2.99643	0.605988	chr2R	12938669	12940772	2104	+	345	401	2101	1289	0.6425	0.6256	0.8281	0.7641
CG9646	3_Junction_17812_Junction_17813*5_Junction_17811_Junction_17812	3_Junction_17812_Junction_17813	J002	0.0241068	12.6419	0.000377196	0.00719417	2.57804	2.38237	-0.652188	chr2R	12940649	12940772	124	+	192	240	436	398	0.3575	0.3744	0.1719	0.2359
CG9646	3_Junction_17812_Junction_17813*5_Junction_17811_Junction_17812	5_Junction_17811_Junction_17812	J001	0.0097432	22.2322	2.41582e-06	0.000112392	2.26579	2.04867	-0.726346	chr2R	12938669	12939325	657	+	82	119	234	167	0.192	0.2288	0.1002	0.1147
CG9646	3_Junction_17812_Junction_17813*5_Junction_17811_Junction_17812	5_Junction_17811_Junction_17812	J002	0.00976274	22.2016	2.45473e-06	0.000113907	2.83322	2.9767	0.477217	chr2R	12938669	12940772	2104	+	345	401	2101	1289	0.808	0.7712	0.8998	0.8853	0.184241
CG5174	3_Junction_18801_Junction_18803*5_Junction_18800_Junction_18801	3_Junction_18801_Junction_18803	J001	0.134019	6.53434	0.0105811	0.0936822	1.76533	2.09188	1.09804	chr2R	14311376	14311630	255	+	28	34	235	215	0.2	0.4533	0.6871	0.6178
CG5174	3_Junction_18801_Junction_18803*5_Junction_18800_Junction_18801	3_Junction_18801_Junction_18803	J002	0.133515	6.55723	0.0104459	0.0928978	2.14012	1.81721	-1.08436	chr2R	14311512	14311630	119	+	112	41	107	133	0.8	0.5467	0.3129	0.3822
CG5174	3_Junction_18801_Junction_18803*5_Junction_18800_Junction_18801	5_Junction_18800_Junction_18801	J001	0.0859025	4.37047	0.0365668	0.228322	1.78808	1.54784	-0.815815	chr2R	14311376	14311472	97	+	15	42	56	89	0.3488	0.5526	0.1924	0.2928
CG5174	3_Junction_18801_Junction_18803*5_Junction_18800_Junction_18801	5_Junction_18800_Junction_18801	J002	0.0867754	4.33299	0.0373806	0.231372	1.81719	2.03925	0.746579	chr2R	14311376	14311630	255	+	28	34	235	215	0.6512	0.4474	0.8076	0.7072	0.3056
CG5174	3_Junction_18806_Junction_18807*5_Junction_18805_Junction_18806	3_Junction_18806_Junction_18807	J001	0.134646	3.34934	0.067232	0.347179	2.49504	2.77163	0.920993	chr2R	14311991	14312375	385	+	176	388	622	658	0.9119	0.7578	0.9382	0.9373
CG5174	3_Junction_18806_Junction_18807*5_Junction_18805_Junction_18806	3_Junction_18806_Junction_18807	J002	0.133746	3.37178	0.0663223	0.344402	1.90514	1.60365	-1.01989	chr2R	14312171	14312375	205	+	17	124	41	44	0.0881	0.2422	0.0618	0.0627
CG5174	3_Junction_18806_Junction_18807*5_Junction_18805_Junction_18806	5_Junction_18805_Junction_18806	J001	0.0102134	37.0732	1.13775e-09	1.25166e-07	2.0355	1.71405	-1.08263	chr2R	14311991	14312110	120	+	60	115	53	72	0.2542	0.2286	0.0785	0.0986
CG5174	3_Junction_18806_Junction_18807*5_Junction_18805_Junction_18806	5_Junction_18805_Junction_18806	J002	0.0103834	36.7377	1.35142e-09	1.47046e-07	2.54484	2.71903	0.579991	chr2R	14311991	14312375	385	+	176	388	622	658	0.7458	0.7714	0.9215	0.9014	0.202186
bl	3_Junction_20332_Junction_20338*5_Junction_20330_Junction_20332	3_Junction_20332_Junction_20338	J001	0.0176281	11.1747	0.000829189	0.0135557	2.12125	2.25422	0.444644	chr2R	16475249	16483060	7812	+	123	151	177	164	0.6949	0.7626	0.8762	0.8586
bl	3_Junction_20332_Junction_20338*5_Junction_20330_Junction_20332	3_Junction_20332_Junction_20338	J002	0.0171598	11.3286	0.000763236	0.0126646	1.69033	1.44843	-0.826132	chr2R	16477172	16483060	5889	+	54	47	25	27	0.3051	0.2374	0.1238	0.1414
bl	3_Junction_20332_Junction_20338*5_Junction_20330_Junction_20332	5_Junction_20330_Junction_20332	J001	0.111096	2.16813	0.140897	0.550862	1.70609	1.54928	-0.533577	chr2R	16475249	16477120	1872	+	59	47	19	48	0.3242	0.2374	0.0969	0.2264
bl	3_Junction_20332_Junction_20338*5_Junction_20330_Junction_20332	5_Junction_20330_Junction_20332	J002	0.112398	2.14715	0.142835	0.554843	2.11844	2.25876	0.469175	chr2R	16475249	16483060	7812	+	123	151	177	164	0.6758	0.7626	0.9031	0.7736	0.174792
RIC-3	3_Junction_20700_Junction_20702*5_Junction_20699_Junction_20700	3_Junction_20700_Junction_20702	J001	0.0105532	43.8628	3.52224e-11	5.31324e-09	2.21053	2.41944	0.697401	chr2R	16911091	16911479	389	+	102	253	277	188	0.7234	0.6838	0.9172	0.9126
RIC-3	3_Junction_20700_Junction_20702*5_Junction_20699_Junction_20700	3_Junction_20700_Junction_20702	J002	0.0101932	44.547	2.48319e-11	3.80348e-09	1.85507	1.39679	-1.56113	chr2R	16911259	16911479	221	+	39	117	25	18	0.2766	0.3162	0.0828	0.0874
RIC-3	3_Junction_20700_Junction_20702*5_Junction_20699_Junction_20700	5_Junction_20699_Junction_20700	J001	0.0275848	24.362	7.98293e-07	4.17208e-05	1.94367	1.60475	-1.14565	chr2R	16911091	16911165	75	+	72	130	33	34	0.4138	0.3394	0.1065	0.1532
RIC-3	3_Junction_20700_Junction_20702*5_Junction_20699_Junction_20700	5_Junction_20699_Junction_20700	J002	0.0281307	24.0296	9.48652e-07	4.88102e-05	2.19026	2.44337	0.844918	chr2R	16911091	16911479	389	+	102	253	277	188	0.5862	0.6606	0.8935	0.8468	0.312663
brp	3_Junction_27811_Junction_27814*5_Junction_27809_Junction_27811	3_Junction_27811_Junction_27814	J001	0.0234841	30.648	3.09345e-08	2.27294e-06	1.37691	0.746486	-2.31736	chr2R	5416132	5417593	1462	+	27	33	4	3	0.6279	0.6346	0.1379	0.1034
brp	3_Junction_27811_Junction_27814*5_Junction_27809_Junction_27811	3_Junction_27811_Junction_27814	J002	0.022033	31.1558	2.38123e-08	1.82366e-06	1.15503	1.53609	1.32794	chr2R	5416508	5417593	1086	+	16	19	25	26	0.3721	0.3654	0.8621	0.8966
brp	3_Junction_27811_Junction_27814*5_Junction_27809_Junction_27811	5_Junction_27809_Junction_27811	J001	0.0488165	20.9812	4.63803e-06	0.000194426	1.24989	1.60259	1.21868	chr2R	5416132	5416474	343	+	15	32	21	35	0.3571	0.4923	0.84	0.9211
brp	3_Junction_27811_Junction_27814*5_Junction_27809_Junction_27811	5_Junction_27809_Junction_27811	J002	0.0543283	20.0276	7.63307e-06	0.000294553	1.34744	0.773155	-2.10778	chr2R	5416132	5417593	1462	+	27	33	4	3	0.6429	0.5077	0.16	0.0789	-0.36575
CG1648	3_Junction_28063_Junction_28067*5_Junction_28062_Junction_28063	3_Junction_28063_Junction_28067	J001	0.163686	37.2522	1.03799e-09	1.14825e-07	2.75832	3.57786	2.72458	chr2R	5700169	5707343	7175	-	674	508	2437	5162	0.6247	0.6675	0.9783	0.994
CG1648	3_Junction_28063_Junction_28067*5_Junction_28062_Junction_28063	3_Junction_28063_Junction_28067	J002	0.162905	37.4257	9.49627e-10	1.0623e-07	2.50219	1.65549	-2.84038	chr2R	5706513	5707343	831	-	405	253	54	31	0.3753	0.3325	0.0217	0.006
CG1648	3_Junction_28063_Junction_28067*5_Junction_28062_Junction_28063	5_Junction_28062_Junction_28063	J001	0.155504	38.2035	6.37393e-10	7.55463e-08	2.47681	1.64256	-2.79975	chr2R	5700169	5706500	6332	-	344	262	53	31	0.3379	0.3403	0.0213	0.006
CG1648	3_Junction_28063_Junction_28067*5_Junction_28062_Junction_28063	5_Junction_28062_Junction_28063	J002	0.156208	38.0365	6.94333e-10	8.13269e-08	2.76609	3.57008	2.67286	chr2R	5700169	5707343	7175	-	674	508	2437	5162	0.6621	0.6597	0.9787	0.994	0.487923
CG2269	3_Junction_28690_Junction_28692*5_Junction_28689_Junction_28690	3_Junction_28690_Junction_28692	J001	0.190723	6.14837	0.0131533	0.110978	2.38996	2.04665	-1.1476	chr2R	5978304	5980647	2344	+	88	139	221	251	0.1618	0.4399	0.0668	0.0779
CG2269	3_Junction_28690_Junction_28692*5_Junction_28689_Junction_28690	3_Junction_28690_Junction_28692	J002	0.191172	6.13417	0.0132594	0.11159	2.81708	3.15411	1.12075	chr2R	5979501	5980647	1147	+	456	177	3085	2973	0.8382	0.5601	0.9332	0.9221
CG2269	3_Junction_28690_Junction_28692*5_Junction_28689_Junction_28690	5_Junction_28689_Junction_28690	J001	0.0782521	22.8063	1.79176e-06	8.63861e-05	2.43767	2.8691	1.43649	chr2R	5978304	5979260	957	+	136	93	1502	2107	0.6071	0.4009	0.8717	0.8936
CG2269	3_Junction_28690_Junction_28692*5_Junction_28689_Junction_28690	5_Junction_28689_Junction_28690	J002	0.0783241	22.7865	1.81029e-06	8.70687e-05	2.4436	1.99289	-1.50677	chr2R	5978304	5980647	2344	+	88	139	221	251	0.3929	0.5991	0.1283	0.1064	-0.188108
A2bp1	3_Junction_33989_Junction_33996*5_Junction_33987_Junction_33989	3_Junction_33989_Junction_33996	J001	0.0283893	15.1965	9.68822e-05	0.00242352	1.25456	0.66126	-2.24331	chr3L	10573429	10580725	7297	+	22	27	2	3	0.2716	0.2547	0.0299	0.0909
A2bp1	3_Junction_33989_Junction_33996*5_Junction_33987_Junction_33989	3_Junction_33989_Junction_33996	J002	0.0196815	16.8449	4.05631e-05	0.00117227	1.6897	1.84666	0.530509	chr3L	10578639	10580725	2087	+	59	79	65	30	0.7284	0.7453	0.9701	0.9091
A2bp1	3_Junction_33989_Junction_33996*5_Junction_33987_Junction_33989	5_Junction_33987_Junction_33989	J001	0.028903	18.851	1.41336e-05	0.000486899	1.24459	1.5262	0.976451	chr3L	10573429	10577914	4486	+	25	23	28	17	0.5319	0.46	0.9333	0.85
A2bp1	3_Junction_33989_Junction_33996*5_Junction_33987_Junction_33989	5_Junction_33987_Junction_33989	J002	0.0371621	17.4845	2.89653e-05	0.000896978	1.25478	0.661242	-2.24418	chr3L	10573429	10580725	7297	+	22	27	2	3	0.4681	0.54	0.0667	0.15	-0.167898
CG5946	3_Junction_34767_Junction_34769*5_Junction_34765_Junction_34767	3_Junction_34767_Junction_34769	J001	0.0113195	15.3934	8.72926e-05	0.00222842	2.52616	2.37653	-0.498837	chr3L	11810416	11811186	771	-	204	495	211	237	0.6846	0.7444	0.5567	0.5537
CG5946	3_Junction_34767_Junction_34769*5_Junction_34765_Junction_34767	3_Junction_34767_Junction_34769	J002	0.0114186	15.2969	9.18664e-05	0.00232728	2.10098	2.28064	0.600704	chr3L	11810752	11811186	435	-	94	170	168	191	0.3154	0.2556	0.4433	0.4463
CG5946	3_Junction_34767_Junction_34769*5_Junction_34765_Junction_34767	5_Junction_34765_Junction_34767	J001	0.0494464	5.96256	0.0146128	0.120005	2.72861	2.92026	0.637607	chr3L	11810416	11810487	72	-	404	658	965	665	0.6645	0.5707	0.8206	0.7373
CG5946	3_Junction_34767_Junction_34769*5_Junction_34765_Junction_34767	5_Junction_34765_Junction_34767	J002	0.0493424	5.97459	0.0145134	0.119369	2.55157	2.35304	-0.661858	chr3L	11810416	11811186	771	-	204	495	211	237	0.3355	0.4293	0.1794	0.2627	-0.14546
Rbp6	3_Junction_38555_Junction_38557*5_Junction_38554_Junction_38555	3_Junction_38555_Junction_38557	J001	0.00728011	13.6081	0.00022521	0.00469077	2.32744	2.4555	0.427158	chr3L	17058808	17060235	1428	-	201	227	324	235	0.3083	0.2677	0.399	0.4159
Rbp6	3_Junction_38555_Junction_38557*5_Junction_38554_Junction_38555	3_Junction_38555_Junction_38557	J002	0.00724656	13.6523	0.000219967	0.00459118	2.7276	2.62177	-0.352281	chr3L	17059940	17060235	296	-	451	621	488	330	0.6917	0.7323	0.601	0.5841
Rbp6	3_Junction_38555_Junction_38557*5_Junction_38554_Junction_38555	5_Junction_38554_Junction_38555	J001	0.0858588	6.00013	0.0143049	0.118149	2.3029	2.10205	-0.671446	chr3L	17058808	17059723	916	-	198	237	168	54	0.4962	0.5108	0.3415	0.1869
Rbp6	3_Junction_38555_Junction_38557*5_Junction_38554_Junction_38555	5_Junction_38554_Junction_38555	J002	0.0856474	6.01371	0.0141952	0.117528	2.29517	2.49109	0.653494	chr3L	17058808	17060235	1428	-	201	227	324	235	0.5038	0.4892	0.6585	0.8131	0.132285
Dyrk2	3_Junction_4071_Junction_4076*5_Junction_4070_Junction_4071	3_Junction_4071_Junction_4076	J001	0.0178389	18.5459	1.65858e-05	0.000553429	0.646521	1.406	2.83411	chr2L	14197867	14222015	24149	-	1	1	22	153	0.0476	0.0333	0.2895	0.3312
Dyrk2	3_Junction_4071_Junction_4076*5_Junction_4070_Junction_4071	3_Junction_4071_Junction_4076	J002	0.01794	18.5242	1.6776e-05	0.000556966	1.93164	1.71159	-0.742312	chr2L	14217069	14222015	4947	-	20	29	54	309	0.9524	0.9667	0.7105	0.6688
Dyrk2	3_Junction_4071_Junction_4076*5_Junction_4070_Junction_4071	5_Junction_4070_Junction_4071	J001	0.0153075	26.1087	3.22727e-07	1.8051e-05	1.95514	1.72709	-0.768778	chr2L	14197867	14217025	19159	-	37	22	42	291	0.9737	0.9565	0.6562	0.6554
Dyrk2	3_Junction_4071_Junction_4076*5_Junction_4070_Junction_4071	5_Junction_4070_Junction_4071	J002	0.015267	26.1222	3.20472e-07	1.80261e-05	0.605801	1.45818	3.19132	chr2L	14197867	14222015	24149	-	1	1	22	153	0.0263	0.0435	0.3438	0.3446	0.176578
CG10508	3_Junction_41623_Junction_41626*5_Junction_41622_Junction_41623	3_Junction_41623_Junction_41626	J001	0.244728	9.93393	0.0016226	0.0232943	2.10545	1.64342	-1.55665	chr3L	21207476	21208471	996	+	103	167	64	12	0.3527	0.5719	0.1322	0.0355
CG10508	3_Junction_41623_Junction_41626*5_Junction_41622_Junction_41623	3_Junction_41623_Junction_41626	J002	0.245676	9.89789	0.00165469	0.0236653	2.15935	2.61062	1.50559	chr3L	21208212	21208471	260	+	189	125	420	326	0.6473	0.4281	0.8678	0.9645
CG10508	3_Junction_41623_Junction_41626*5_Junction_41622_Junction_41623	5_Junction_41622_Junction_41623	J001	0.0360905	53.9816	2.0238e-13	4.47755e-11	1.52858	2.05519	1.77995	chr3L	21207476	21207710	235	+	31	37	157	54	0.2313	0.1814	0.7104	0.8182
CG10508	3_Junction_41623_Junction_41626*5_Junction_41622_Junction_41623	5_Junction_41622_Junction_41623	J002	0.0364132	53.66	2.38365e-13	5.15904e-11	2.12201	1.61838	-1.69726	chr3L	21207476	21208471	996	+	103	167	64	12	0.7687	0.8186	0.2896	0.1818	-0.348014
srpk79D	3_Junction_42506_Junction_42509*5_Junction_42505_Junction_42506	3_Junction_42506_Junction_42509	J001	0.387783	2.89045	0.0891061	0.418265	1.05264	1.38596	1.18054	chr3L	22273036	22274330	1295	+	1	7	65	51	0.0345	0.3889	0.461	0.6
srpk79D	3_Junction_42506_Junction_42509*5_Junction_42505_Junction_42506	3_Junction_42506_Junction_42509	J002	0.384262	2.91131	0.0879602	0.415093	1.68753	1.37153	-1.08248	chr3L	22273417	22274330	914	+	28	11	76	34	0.9655	0.6111	0.539	0.4
srpk79D	3_Junction_42506_Junction_42509*5_Junction_42505_Junction_42506	5_Junction_42505_Junction_42506	J001	0.0374765	11.888	0.000564959	0.00999953	2.07201	1.86312	-0.701566	chr3L	22273036	22273257	222	+	32	70	152	176	0.9697	0.9091	0.7005	0.7753
srpk79D	3_Junction_42506_Junction_42509*5_Junction_42505_Junction_42506	5_Junction_42505_Junction_42506	J002	0.0380607	11.8125	0.000588359	0.0102857	1.00352	1.42664	1.50121	chr3L	22273036	22274330	1295	+	1	7	65	51	0.0303	0.0909	0.2995	0.2247	0.160653
nAChRalpha4	3_Junction_43117_Junction_43125*5_Junction_43115_Junction_43117	3_Junction_43117_Junction_43125	J001	0.113233	4.69297	0.0302862	0.199693	1.55147	1.29817	-0.874834	chr3L	23220647	23255806	35160	+	38	23	17	27	0.6786	0.4107	0.2329	0.3034
nAChRalpha4	3_Junction_43117_Junction_43125*5_Junction_43115_Junction_43117	3_Junction_43117_Junction_43125	J002	0.111085	4.76297	0.0290784	0.194168	1.48644	1.71685	0.785299	chr3L	23232117	23255806	23690	+	18	33	56	62	0.3214	0.5893	0.7671	0.6966
nAChRalpha4	3_Junction_43117_Junction_43125*5_Junction_43115_Junction_43117	5_Junction_43115_Junction_43117	J001	0.0589646	4.13314	0.0420513	0.252054	1.35313	1.54561	0.663197	chr3L	23220647	23231935	11289	+	17	23	23	52	0.3091	0.5	0.575	0.6582
nAChRalpha4	3_Junction_43117_Junction_43125*5_Junction_43115_Junction_43117	5_Junction_43115_Junction_43117	J002	0.0592661	4.11939	0.0423943	0.253283	1.52374	1.32666	-0.680485	chr3L	23220647	23255806	35160	+	38	23	17	27	0.6909	0.5	0.425	0.3418	-0.221557
Fife	3_Junction_43973_Junction_43978*5_Junction_43972_Junction_43973	3_Junction_43973_Junction_43978	J001	0.170828	11.7847	0.000597183	0.0103778	1.28349	1.78295	1.71231	chr3L	2689938	2711350	21413	-	35	14	23	71	0.2692	0.1007	0.575	0.7396
Fife	3_Junction_43973_Junction_43978*5_Junction_43972_Junction_43973	3_Junction_43973_Junction_43978	J002	0.170198	11.8228	0.000585106	0.0102549	1.93045	1.45139	-1.62633	chr3L	2697926	2711350	13425	-	95	125	17	25	0.7308	0.8993	0.425	0.2604
Fife	3_Junction_43973_Junction_43978*5_Junction_43972_Junction_43973	5_Junction_43972_Junction_43973	J001	0.0296294	74.8181	5.16144e-18	2.09744e-15	2.0941	1.54621	-1.85	chr3L	2689938	2697694	7757	-	263	159	14	27	0.8826	0.9191	0.3784	0.2755
Fife	3_Junction_43973_Junction_43978*5_Junction_43972_Junction_43973	5_Junction_43972_Junction_43973	J002	0.0292434	75.3852	3.87282e-18	1.67642e-15	1.18501	1.89432	2.43521	chr3L	2689938	2711350	21413	-	35	14	23	71	0.1174	0.0809	0.6216	0.7245	0.433562
CG15270	3_Junction_4538_Junction_4539*5_Junction_4537_Junction_4538	3_Junction_4538_Junction_4539	J001	0.03145	13.775	0.000206062	0.00435112	1.40765	1.08186	-1.14944	chr2L	15092641	15093417	777	+	24	17	10	17	0.75	0.6538	0.2778	0.3542
CG15270	3_Junction_4538_Junction_4539*5_Junction_4537_Junction_4538	3_Junction_4538_Junction_4539	J002	0.0314132	13.7805	0.000205463	0.00434307	1.05033	1.38855	1.19788	chr2L	15093036	15093417	382	+	8	9	26	31	0.25	0.3462	0.7222	0.6458
CG15270	3_Junction_4538_Junction_4539*5_Junction_4537_Junction_4538	5_Junction_4537_Junction_4538	J001	0.0267966	3.52642	0.0603981	0.325009	1.23422	1.38005	0.509711	chr2L	15092641	15092897	257	+	23	10	17	29	0.4894	0.3704	0.6296	0.6304
CG15270	3_Junction_4538_Junction_4539*5_Junction_4537_Junction_4538	5_Junction_4537_Junction_4538	J002	0.0282147	3.47209	0.0624125	0.331031	1.32507	1.16182	-0.57535	chr2L	15092641	15093417	777	+	24	17	10	17	0.5106	0.6296	0.3704	0.3696	-0.249564
lark	3_Junction_47918_Junction_47920*5_Junction_47916_Junction_47918	3_Junction_47918_Junction_47920	J001	0.222171	1.08257	0.298123	0.805776	2.19992	2.04735	-0.510666	chr3L	7332717	7333974	1258	+	173	94	118	150	0.7555	0.4332	0.344	0.5085
lark	3_Junction_47918_Junction_47920*5_Junction_47916_Junction_47918	3_Junction_47918_Junction_47920	J002	0.222207	1.08241	0.29816	0.805776	2.04432	2.19693	0.510862	chr3L	7333870	7333974	105	+	56	123	225	145	0.2445	0.5668	0.656	0.4915
lark	3_Junction_47918_Junction_47920*5_Junction_47916_Junction_47918	5_Junction_47916_Junction_47918	J001	0.00668686	11.1748	0.000829174	0.0135557	1.75207	1.91582	0.552122	chr3L	7332717	7332966	250	+	61	37	83	104	0.2607	0.2824	0.4129	0.4094
lark	3_Junction_47918_Junction_47920*5_Junction_47916_Junction_47918	5_Junction_47916_Junction_47918	J002	0.00688679	11.0468	0.000888401	0.014347	2.1807	2.07029	-0.369532	chr3L	7332717	7333974	1258	+	173	94	118	150	0.7393	0.7176	0.5871	0.5906	-0.156848
nmo	3_Junction_48560_Junction_48562*5_Junction_48559_Junction_48560	3_Junction_48560_Junction_48562	J001	0.0274216	6.995	0.00817378	0.0783012	2.63113	2.48872	-0.474417	chr3L	8040700	8042967	2268	+	223	281	648	368	0.6299	0.7356	0.5307	0.5227
nmo	3_Junction_48560_Junction_48562*5_Junction_48559_Junction_48560	3_Junction_48560_Junction_48562	J002	0.0275168	6.97407	0.00826994	0.07884	2.28999	2.44003	0.500615	chr3L	8041543	8042967	1425	+	131	101	573	336	0.3701	0.2644	0.4693	0.4773
nmo	3_Junction_48560_Junction_48562*5_Junction_48559_Junction_48560	5_Junction_48559_Junction_48560	J001	0.0666924	0.332004	0.564481	0.997143	1.99772	2.03763	0.133846	chr3L	8040700	8041168	469	+	74	59	158	165	0.2492	0.1735	0.196	0.3096
nmo	3_Junction_48560_Junction_48562*5_Junction_48559_Junction_48560	5_Junction_48559_Junction_48560	J002	0.0666778	0.332069	0.564443	0.997143	2.57854	2.54202	-0.12167	chr3L	8040700	8042967	2268	+	223	281	648	368	0.7508	0.8265	0.804	0.6904	-0.132418
mtd	3_Junction_52302_Junction_52587*5_Junction_52301_Junction_52302	3_Junction_52302_Junction_52587	J001	0.0288915	9.81573	0.00173026	0.0244001	1.66606	1.86842	0.684031	chr3R	1100809	1118360	17552	-	38	51	69	80	0.4043	0.3806	0.5656	0.6897
mtd	3_Junction_52302_Junction_52587*5_Junction_52301_Junction_52302	3_Junction_52302_Junction_52587	J002	0.0288866	9.81677	0.00172928	0.0244001	1.8577	1.65334	-0.691122	chr3R	1117801	1118360	560	-	56	83	53	36	0.5957	0.6194	0.4344	0.3103
mtd	3_Junction_52302_Junction_52587*5_Junction_52301_Junction_52302	5_Junction_52301_Junction_52302	J001	0.257965	0.846702	0.357487	0.869532	1.85979	1.61292	-0.83562	chr3R	1100809	1117710	16902	-	16	126	33	45	0.2963	0.7119	0.3235	0.36
mtd	3_Junction_52302_Junction_52587*5_Junction_52301_Junction_52302	5_Junction_52301_Junction_52302	J002	0.257975	0.846668	0.357497	0.869532	1.6453	1.8913	0.83157	chr3R	1100809	1118360	17552	-	38	51	69	80	0.7037	0.2881	0.6765	0.64	0.200224
gish	3_Junction_53334_Junction_53338*5_Junction_53333_Junction_53334	3_Junction_53334_Junction_53338	J001	0.0309585	11.8362	0.000580889	0.010208	1.50809	1.19677	-1.08346	chr3R	12124272	12126965	2694	+	10	42	18	17	0.3704	0.2234	0.1006	0.0863
gish	3_Junction_53334_Junction_53338*5_Junction_53333_Junction_53334	3_Junction_53334_Junction_53338	J002	0.0292007	12.1369	0.000494344	0.00893833	2.00268	2.15929	0.524625	chr3R	12125411	12126965	1555	+	17	146	161	180	0.6296	0.7766	0.8994	0.9137
gish	3_Junction_53334_Junction_53338*5_Junction_53333_Junction_53334	5_Junction_53333_Junction_53334	J001	0.0161997	12.4854	0.000410151	0.00771714	1.9035	2.03829	0.45263	chr3R	12124272	12125311	1040	+	20	111	118	140	0.6667	0.7255	0.8676	0.8917
gish	3_Junction_53334_Junction_53338*5_Junction_53333_Junction_53334	5_Junction_53333_Junction_53334	J002	0.0175099	12.1394	0.000493686	0.00893833	1.50588	1.19635	-1.07734	chr3R	12124272	12126965	2694	+	10	42	18	17	0.3333	0.2745	0.1324	0.1083	-0.121092
Gdh	3_Junction_60509_Junction_60510*5_Junction_60508_Junction_60509	3_Junction_60509_Junction_60510	J001	0.0154579	5.38185	0.0203473	0.151914	2.40532	2.32738	-0.260034	chr3R	19762367	19763143	777	-	143	281	347	140	0.8773	0.8673	0.8146	0.7609
Gdh	3_Junction_60509_Junction_60510*5_Junction_60508_Junction_60509	3_Junction_60509_Junction_60510	J002	0.0150634	5.4468	0.0196042	0.148003	1.58298	1.72871	0.495099	chr3R	19762741	19763143	403	-	20	43	79	44	0.1227	0.1327	0.1854	0.2391
Gdh	3_Junction_60509_Junction_60510*5_Junction_60508_Junction_60509	5_Junction_60508_Junction_60509	J001	0.0270767	4.19803	0.0404709	0.245314	1.96496	2.09717	0.443345	chr3R	19762367	19762701	335	-	67	81	206	93	0.319	0.2238	0.3725	0.3991
Gdh	3_Junction_60509_Junction_60510*5_Junction_60508_Junction_60509	5_Junction_60508_Junction_60509	J002	0.0272328	4.1787	0.0409352	0.2473	2.42487	2.30995	-0.383396	chr3R	19762367	19763143	777	-	143	281	347	140	0.681	0.7762	0.6275	0.6009	-0.13055
wry	3_Junction_6098_Junction_6120*5_Junction_6097_Junction_6098	3_Junction_6098_Junction_6120	J001	0.0965538	6.38001	0.0115413	0.0998867	2.09488	1.80066	-0.98877	chr2L	1836652	1842897	6246	+	185	44	56	85	0.5745	0.3548	0.1818	0.2443
wry	3_Junction_6098_Junction_6120*5_Junction_6097_Junction_6098	3_Junction_6098_Junction_6120	J002	0.0973556	6.33049	0.011868	0.102069	2.08035	2.36364	0.946859	chr2L	1837406	1842897	5492	+	137	80	252	263	0.4255	0.6452	0.8182	0.7557
wry	3_Junction_6098_Junction_6120*5_Junction_6097_Junction_6098	5_Junction_6097_Junction_6098	J001	0.301074	4.34349	0.0371508	0.230522	1.60748	2.02042	1.39398	chr2L	1836652	1837189	538	+	23	38	106	164	0.1106	0.4634	0.6543	0.6586
wry	3_Junction_6098_Junction_6120*5_Junction_6097_Junction_6098	5_Junction_6097_Junction_6098	J002	0.301688	4.33495	0.0373376	0.231177	2.15246	1.74243	-1.37826	chr2L	1836652	1842897	6246	+	185	44	56	85	0.8894	0.5366	0.3457	0.3414	-0.253278
Vha100-1	3_Junction_65548_Junction_65550*5_Junction_65547_Junction_65548	3_Junction_65548_Junction_65550	J001	0.0415951	50.0925	1.46669e-12	2.70415e-10	1.85715	1.18873	-2.29683	chr3R	24962421	24962796	376	+	74	73	15	13	0.3795	0.3093	0.0287	0.057
Vha100-1	3_Junction_65548_Junction_65550*5_Junction_65547_Junction_65548	3_Junction_65548_Junction_65550	J002	0.0423339	49.4547	2.03004e-12	3.65635e-10	2.14384	2.58497	1.47204	chr3R	24962632	24962796	165	+	121	163	507	215	0.6205	0.6907	0.9713	0.943
Vha100-1	3_Junction_65548_Junction_65550*5_Junction_65547_Junction_65548	5_Junction_65547_Junction_65548	J001	0.0516999	45.1972	1.78164e-11	2.83808e-09	2.19257	2.65649	1.54722	chr3R	24962421	24962625	205	+	126	191	589	263	0.63	0.7235	0.9752	0.9529
Vha100-1	3_Junction_65548_Junction_65550*5_Junction_65547_Junction_65548	5_Junction_65547_Junction_65548	J002	0.0510663	45.6258	1.43142e-11	2.29858e-09	1.85701	1.18913	-2.29495	chr3R	24962421	24962796	376	+	74	73	15	13	0.37	0.2765	0.0248	0.0471	-0.180756
CG1607	3_Junction_67087_Junction_67088*5_Junction_67086_Junction_67087	3_Junction_67087_Junction_67088	J001	0.0777427	23.7797	1.08014e-06	5.445e-05	1.77937	2.24322	1.55678	chr3R	27215920	27216309	390	+	43	28	204	397	0.3981	0.2314	0.7528	0.8254
CG1607	3_Junction_67087_Junction_67088*5_Junction_67086_Junction_67087	3_Junction_67087_Junction_67088	J002	0.0768049	24.0306	9.48184e-07	4.88102e-05	2.13101	1.65726	-1.59516	chr3R	27216081	27216309	229	+	65	93	67	84	0.6019	0.7686	0.2472	0.1746
CG1607	3_Junction_67087_Junction_67088*5_Junction_67086_Junction_67087	5_Junction_67086_Junction_67087	J001	0.00752615	138.803	4.86461e-32	8.07201e-29	2.15182	1.5827	-1.9186	chr3R	27215920	27216018	99	+	106	64	44	82	0.7114	0.6957	0.1774	0.1712
CG1607	3_Junction_67087_Junction_67088*5_Junction_67086_Junction_67087	5_Junction_67086_Junction_67087	J002	0.00776686	137.093	1.15041e-31	1.63621e-28	1.77792	2.24887	1.58056	chr3R	27215920	27216309	390	+	43	28	204	397	0.2886	0.3043	0.8226	0.8288	0.500242
hth	3_Junction_70905_Junction_70907*5_Junction_70904_Junction_70905	3_Junction_70905_Junction_70907	J001	0.0159762	6.77613	0.0092385	0.0856144	1.84628	1.96745	0.407582	chr3R	6439522	6464344	24823	-	74	47	80	135	0.6116	0.5165	0.7273	0.7181
hth	3_Junction_70905_Junction_70907*5_Junction_70904_Junction_70905	3_Junction_70905_Junction_70907	J002	0.0159133	6.78821	0.0091762	0.0851429	1.72694	1.56256	-0.558797	chr3R	6444405	6464344	19940	-	47	44	30	53	0.3884	0.4835	0.2727	0.2819
hth	3_Junction_70905_Junction_70907*5_Junction_70904_Junction_70905	5_Junction_70904_Junction_70905	J001	0.0302544	15.1259	0.000100574	0.00250329	1.68363	1.38437	-1.02474	chr3R	6439522	6444376	4855	-	51	41	12	37	0.408	0.4659	0.1304	0.2151
hth	3_Junction_70905_Junction_70907*5_Junction_70904_Junction_70905	5_Junction_70904_Junction_70905	J002	0.0302009	15.1405	9.98012e-05	0.00248877	1.79847	2.01405	0.725253	chr3R	6439522	6464344	24823	-	74	47	80	135	0.592	0.5341	0.8696	0.7849	0.234722
Jupiter	3_Junction_71647_Junction_71652*5_Junction_71646_Junction_71647	3_Junction_71647_Junction_71652	J001	0.0129345	110.879	6.2907e-26	4.81771e-23	2.11519	2.59515	1.60183	chr3R	7417029	7418087	1059	-	33	134	900	255	0.0889	0.11	0.4813	0.43
Jupiter	3_Junction_71647_Junction_71652*5_Junction_71646_Junction_71647	3_Junction_71647_Junction_71652	J002	0.0130042	110.426	7.90309e-26	5.80532e-23	3.04708	2.64716	-1.33046	chr3R	7417734	7418087	354	-	338	1084	970	338	0.9111	0.89	0.5187	0.57
Jupiter	3_Junction_71647_Junction_71652*5_Junction_71646_Junction_71647	5_Junction_71646_Junction_71647	J001	0.0335409	49.0808	2.45627e-12	4.3669e-10	3.30643	2.89604	-1.3644	chr3R	7417029	7417715	687	-	671	1831	1718	685	0.9531	0.9318	0.6562	0.7287
Jupiter	3_Junction_71647_Junction_71652*5_Junction_71646_Junction_71647	5_Junction_71646_Junction_71647	J002	0.0332585	49.4468	2.03824e-12	3.65635e-10	2.13337	2.58193	1.49695	chr3R	7417029	7418087	1059	-	33	134	900	255	0.0469	0.0682	0.3438	0.2713	0.187374
CG4848	3_Junction_72380_Junction_72381*5_Junction_72378_Junction_72380	3_Junction_72380_Junction_72381	J001	0.0435155	11.18	0.000826834	0.0135394	1.8054	1.967	0.543915	chr3R	8041675	8042601	927	-	65	70	110	58	0.7471	0.8434	0.9402	0.9667
CG4848	3_Junction_72380_Junction_72381*5_Junction_72378_Junction_72380	3_Junction_72380_Junction_72381	J002	0.0674489	9.09676	0.00256063	0.0326422	1.23368	0.767667	-1.73138	chr3R	8042408	8042601	194	-	22	13	7	2	0.2529	0.1566	0.0598	0.0333
CG4848	3_Junction_72380_Junction_72381*5_Junction_72378_Junction_72380	5_Junction_72378_Junction_72380	J001	0.0245772	6.26288	0.0123293	0.105288	1.41448	1.15382	-0.914205	chr3R	8041675	8042353	679	-	21	30	14	12	0.2442	0.3	0.1129	0.1714
CG4848	3_Junction_72380_Junction_72381*5_Junction_72378_Junction_72380	5_Junction_72378_Junction_72380	J002	0.0215109	6.64548	0.00994077	0.0899076	1.82584	1.94435	0.398914	chr3R	8041675	8042601	927	-	65	70	110	58	0.7558	0.7	0.8871	0.8286	0.211965
sqd	3_Junction_73351_Junction_73354*5_Junction_73349_Junction_73351	3_Junction_73351_Junction_73354	J001	0.183816	7.19149	0.00732501	0.07217	1.99736	2.31186	1.05229	chr3R	9462247	9468019	5773	-	68	70	305	275	0.1257	0.1182	0.2824	0.6044
sqd	3_Junction_73351_Junction_73354*5_Junction_73349_Junction_73351	3_Junction_73351_Junction_73354	J002	0.183294	7.21136	0.00724437	0.0717304	2.85248	2.54559	-1.02156	chr3R	9462800	9468019	5220	-	473	522	775	180	0.8743	0.8818	0.7176	0.3956
sqd	3_Junction_73351_Junction_73354*5_Junction_73349_Junction_73351	5_Junction_73349_Junction_73351	J001	0.222278	4.4705	0.0344849	0.219097	2.74941	2.48118	-0.89325	chr3R	9462247	9462691	445	-	258	479	707	155	0.7914	0.8725	0.6986	0.3605
sqd	3_Junction_73351_Junction_73354*5_Junction_73349_Junction_73351	5_Junction_73349_Junction_73351	J002	0.22314	4.45368	0.0348261	0.220235	2.01781	2.29131	0.915065	chr3R	9462247	9468019	5773	-	68	70	305	275	0.2086	0.1275	0.3014	0.6395	0.235515
Caps	3_Junction_74882_Junction_74886*5_Junction_74881_Junction_74882	3_Junction_74882_Junction_74886	J001	0.0530504	5.0987	0.0239437	0.169186	1.93397	2.12926	0.654894	chr4	1254609	1259566	4958	+	53	86	118	212	0.6709	0.5	0.7375	0.7823
Caps	3_Junction_74882_Junction_74886*5_Junction_74881_Junction_74882	3_Junction_74882_Junction_74886	J002	0.0524882	5.14555	0.023306	0.165858	1.84681	1.62622	-0.746653	chr4	1257938	1259566	1629	+	26	86	42	59	0.3291	0.5	0.2625	0.2177
Caps	3_Junction_74882_Junction_74886*5_Junction_74881_Junction_74882	5_Junction_74881_Junction_74882	J001	0.0208008	7.08677	0.00776551	0.0756122	1.73349	1.54997	-0.623995	chr4	1254609	1257730	3122	+	35	46	41	50	0.3977	0.3485	0.2579	0.1908
Caps	3_Junction_74882_Junction_74886*5_Junction_74881_Junction_74882	5_Junction_74881_Junction_74882	J002	0.021126	7.02489	0.00803844	0.077507	1.96694	2.09554	0.431225	chr4	1254609	1259566	4958	+	53	86	118	212	0.6023	0.6515	0.7421	0.8092	0.194047
Caps	3_Junction_74892_Junction_74894*5_Junction_74891_Junction_74892	3_Junction_74892_Junction_74894	J001	0.19879	4.71217	0.0299499	0.19793	1.83409	2.13775	1.01947	chr4	1265819	1268380	2562	+	49	74	98	205	0.3952	0.4	0.5799	0.8577
Caps	3_Junction_74892_Junction_74894*5_Junction_74891_Junction_74892	3_Junction_74892_Junction_74894	J002	0.198149	4.72648	0.0297016	0.196811	2.01146	1.7046	-1.03403	chr4	1266305	1268380	2076	+	75	111	71	34	0.6048	0.6	0.4201	0.1423
Caps	3_Junction_74892_Junction_74894*5_Junction_74891_Junction_74892	5_Junction_74891_Junction_74892	J001	0.18779	4.69	0.0303386	0.199968	1.95812	1.64134	-1.06965	chr4	1265819	1266136	318	+	51	113	59	31	0.51	0.6043	0.3758	0.1314
Caps	3_Junction_74892_Junction_74894*5_Junction_74891_Junction_74892	5_Junction_74891_Junction_74892	J002	0.188594	4.6713	0.0306707	0.201291	1.83045	2.14142	1.04403	chr4	1265819	1268380	2562	+	49	74	98	205	0.49	0.3957	0.6242	0.8686	0.330381
NONE	3_Junction_75112_Junction_75116*5_Junction_75111_Junction_75112	3_Junction_75112_Junction_75116	J001	0.0290656	14.7148	0.000125062	0.00297518	0.879309	1.33606	1.65347	chr4	1306446	1306601	156	+	8	1	33	28	0.16	0.0526	0.4231	0.4667
NONE	3_Junction_75112_Junction_75116*5_Junction_75111_Junction_75112	3_Junction_75112_Junction_75116	J002	0.0217132	15.9887	6.372e-05	0.00172156	1.65007	1.43422	-0.738485	chr4	1306538	1306601	64	+	42	18	45	32	0.84	0.9474	0.5769	0.5333
NONE	3_Junction_75112_Junction_75116*5_Junction_75111_Junction_75112	5_Junction_75111_Junction_75112	J001	0.0179996	32.4908	1.19761e-08	1.01909e-06	2.01134	1.81112	-0.673458	chr4	1306446	1306510	65	+	149	36	84	59	0.949	0.973	0.7179	0.6782
NONE	3_Junction_75112_Junction_75116*5_Junction_75111_Junction_75112	5_Junction_75111_Junction_75112	J002	0.023855	29.5605	5.41977e-08	3.6707e-06	0.780206	1.44769	2.42659	chr4	1306446	1306601	156	+	8	1	33	28	0.051	0.027	0.2821	0.3218	0.190307
CaMKI	3_Junction_76385_Junction_76389*5_Junction_76382_Junction_76385	3_Junction_76385_Junction_76389	J001	0.0680074	4.10879	0.042661	0.254331	2.38462	2.54973	0.55037	chr4	467861	470866	3006	+	125	287	291	539	0.5165	0.5456	0.6299	0.7834
CaMKI	3_Junction_76385_Junction_76389*5_Junction_76382_Junction_76385	3_Junction_76385_Junction_76389	J002	0.0683043	4.09214	0.0430832	0.255581	2.32014	2.14913	-0.571444	chr4	470594	470866	273	+	117	239	171	149	0.4835	0.4544	0.3701	0.2166
CaMKI	3_Junction_76385_Junction_76389*5_Junction_76382_Junction_76385	5_Junction_76382_Junction_76385	J001	0.0238629	13.3952	0.00025227	0.00514145	2.31728	2.1117	-0.687186	chr4	467861	470548	2688	+	111	251	131	159	0.4703	0.4665	0.3104	0.2278
CaMKI	3_Junction_76385_Junction_76389*5_Junction_76382_Junction_76385	5_Junction_76382_Junction_76385	J002	0.0237147	13.465	0.000243061	0.00498995	2.37357	2.56004	0.621594	chr4	467861	470866	3006	+	125	287	291	539	0.5297	0.5335	0.6896	0.7722	0.201806
Hk	3_Junction_78041_Junction_78050*5_Junction_78040_Junction_78041	3_Junction_78041_Junction_78050	J001	0.0930839	1.35201	0.244927	0.733243	1.88708	1.97593	0.298653	chrX	10149623	10152909	3287	-	43	78	113	120	0.5658	0.6	0.6075	0.8
Hk	3_Junction_78041_Junction_78050*5_Junction_78040_Junction_78041	3_Junction_78041_Junction_78050	J002	0.092821	1.355	0.244406	0.732585	1.73429	1.63877	-0.324	chrX	10152050	10152909	860	-	33	52	73	30	0.4342	0.4	0.3925	0.2
Hk	3_Junction_78041_Junction_78050*5_Junction_78040_Junction_78041	5_Junction_78040_Junction_78041	J001	0.189244	3.89231	0.0485078	0.27809	1.95927	1.6856	-0.923265	chrX	10149623	10151699	2077	-	38	136	71	21	0.4691	0.6355	0.3859	0.1489
Hk	3_Junction_78041_Junction_78050*5_Junction_78040_Junction_78041	5_Junction_78040_Junction_78041	J002	0.189597	3.88565	0.0487003	0.278541	1.79684	2.0673	0.909265	chrX	10149623	10152909	3287	-	43	78	113	120	0.5309	0.3645	0.6141	0.8511	0.235509
bif	3_Junction_79771_Junction_79773*5_Junction_79769_Junction_79771	3_Junction_79771_Junction_79773	J001	0.0803313	0.178201	0.672924	1	1.58015	1.54905	-0.106222	chrX	11583576	11587578	4003	+	32	41	49	19	0.7273	0.5125	0.5269	0.6129
bif	3_Junction_79771_Junction_79773*5_Junction_79769_Junction_79771	3_Junction_79771_Junction_79773	J002	0.0818318	0.176367	0.674514	1	1.43591	1.46962	0.116055	chrX	11587210	11587578	369	+	12	39	44	12	0.2727	0.4875	0.4731	0.3871
bif	3_Junction_79771_Junction_79773*5_Junction_79769_Junction_79771	5_Junction_79769_Junction_79771	J001	0.107474	8.44801	0.00365443	0.0427036	1.07573	1.43468	1.26495	chrX	11583576	11586830	3255	+	9	7	36	36	0.2195	0.1458	0.4235	0.6545
bif	3_Junction_79771_Junction_79773*5_Junction_79769_Junction_79771	5_Junction_79769_Junction_79771	J002	0.101871	8.76136	0.00307679	0.0373112	1.70999	1.42145	-0.985816	chrX	11583576	11587578	4003	+	32	41	49	19	0.7805	0.8542	0.5765	0.3455	-0.205805
Nhe2	3_Junction_8076_Junction_8077*5_Junction_8075_Junction_8076	3_Junction_8076_Junction_8077	J001	0.00505185	10.512	0.00118602	0.0180828	2.27149	2.16997	-0.339289	chr2L	21122389	21124133	1745	+	129	218	148	167	0.6262	0.6319	0.5121	0.5
Nhe2	3_Junction_8076_Junction_8077*5_Junction_8075_Junction_8076	3_Junction_8076_Junction_8077	J002	0.00501014	10.549	0.0011625	0.0177923	2.04125	2.15993	0.397428	chr2L	21122927	21124133	1207	+	77	127	141	167	0.3738	0.3681	0.4879	0.5
Nhe2	3_Junction_8076_Junction_8077*5_Junction_8075_Junction_8076	5_Junction_8075_Junction_8076	J001	0.00690958	9.12916	0.00251567	0.032252	2.1037	2.21197	0.36219	chr2L	21122389	21122911	523	+	77	158	160	187	0.3738	0.4202	0.5195	0.5282
Nhe2	3_Junction_8076_Junction_8077*5_Junction_8075_Junction_8076	5_Junction_8075_Junction_8076	J002	0.00693201	9.11475	0.00253557	0.0324266	2.27163	2.17052	-0.337919	chr2L	21122389	21124133	1745	+	129	218	148	167	0.6262	0.5798	0.4805	0.4718	-0.119536
CG8671	3_Junction_8251_Junction_8256*5_Junction_8250_Junction_8251	3_Junction_8251_Junction_8256	J001	0.0115166	18.1912	1.998e-05	0.000647952	1.79789	1.99317	0.657142	chr2L	21275806	21281130	5325	+	18	89	122	100	0.3913	0.4684	0.7011	0.6803
CG8671	3_Junction_8251_Junction_8256*5_Junction_8250_Junction_8251	3_Junction_8251_Junction_8256	J002	0.011442	18.2393	1.94821e-05	0.000632834	1.87765	1.64623	-0.78247	chr2L	21280447	21281130	684	+	28	101	52	47	0.6087	0.5316	0.2989	0.3197
CG8671	3_Junction_8251_Junction_8256*5_Junction_8250_Junction_8251	5_Junction_8250_Junction_8251	J001	0.254652	0.187677	0.664857	1	1.57677	1.57172	-0.017217	chr2L	21275806	21279882	4077	+	25	27	35	70	0.5814	0.2328	0.2229	0.4118
CG8671	3_Junction_8251_Junction_8256*5_Junction_8250_Junction_8251	5_Junction_8250_Junction_8251	J002	0.254639	0.187685	0.664851	1	1.89916	1.90401	0.01632	chr2L	21275806	21281130	5325	+	18	89	122	100	0.4186	0.7672	0.7771	0.5882	0.190451
Rab3-GEF	3_Junction_85263_Junction_85265*5_Junction_85262_Junction_85263	3_Junction_85263_Junction_85265	J001	0.0837656	8.33055	0.00389838	0.0449322	1.87292	2.17018	0.997136	chrX	14997177	15003728	6552	+	68	62	223	103	0.4224	0.2288	0.6246	0.6205
Rab3-GEF	3_Junction_85263_Junction_85265*5_Junction_85262_Junction_85263	3_Junction_85263_Junction_85265	J002	0.084018	8.30778	0.00394756	0.0453833	2.24605	1.95258	-0.982857	chrX	15000482	15003728	3247	+	93	209	134	63	0.5776	0.7712	0.3754	0.3795
Rab3-GEF	3_Junction_85263_Junction_85265*5_Junction_85262_Junction_85263	5_Junction_85262_Junction_85263	J001	0.137248	5.3918	0.0202316	0.151221	2.2752	1.95848	-1.06042	chrX	14997177	15000472	3296	+	83	246	129	66	0.5497	0.7987	0.3665	0.3905
Rab3-GEF	3_Junction_85263_Junction_85265*5_Junction_85262_Junction_85263	5_Junction_85262_Junction_85263	J002	0.136813	5.4081	0.0200436	0.150144	1.86211	2.18143	1.07117	chrX	14997177	15003728	6552	+	68	62	223	103	0.4503	0.2013	0.6335	0.6095	0.252101
Ranbp16	3_Junction_86317_Junction_86322*5_Junction_86315_Junction_86317	3_Junction_86317_Junction_86322	J001	0.0464534	4.34453	0.037128	0.230522	2.09324	2.24671	0.513304	chrX	15822963	15823372	410	-	125	149	187	123	0.7267	0.645	0.8578	0.7736
Ranbp16	3_Junction_86317_Junction_86322*5_Junction_86315_Junction_86317	3_Junction_86317_Junction_86322	J002	0.0456812	4.40217	0.0358933	0.225318	1.77309	1.58242	-0.647099	chrX	15823291	15823372	82	-	47	82	31	36	0.2733	0.355	0.1422	0.2264
Ranbp16	3_Junction_86317_Junction_86322*5_Junction_86315_Junction_86317	5_Junction_86315_Junction_86317	J001	0.00798558	32.0474	1.50459e-08	1.2329e-06	1.95304	1.65676	-1.0002	chrX	15822963	15823204	242	-	92	115	50	26	0.424	0.4356	0.211	0.1745
Ranbp16	3_Junction_86317_Junction_86322*5_Junction_86315_Junction_86317	5_Junction_86315_Junction_86317	J002	0.00824076	31.6361	1.85943e-08	1.46924e-06	2.07366	2.26219	0.630593	chrX	15822963	15823372	410	-	125	149	187	123	0.576	0.5644	0.789	0.8255	0.229253
Stim	3_Junction_86349_Junction_86351*5_Junction_86348_Junction_86349	3_Junction_86349_Junction_86351	J001	0.23702	1.46153	0.226688	0.708376	1.37374	1.60933	0.80906	chrX	15830467	15831622	1156	-	15	16	51	66	0.5172	0.2025	0.4397	0.6735
Stim	3_Junction_86349_Junction_86351*5_Junction_86348_Junction_86349	3_Junction_86349_Junction_86351	J002	0.236343	1.46552	0.226054	0.707799	1.7717	1.54373	-0.77455	chrX	15831064	15831622	559	-	14	63	65	32	0.4828	0.7975	0.5603	0.3265
Stim	3_Junction_86349_Junction_86351*5_Junction_86348_Junction_86349	5_Junction_86348_Junction_86349	J001	0.0884218	5.70224	0.0169433	0.133349	1.9407	1.68233	-0.871962	chrX	15830467	15830830	364	-	30	94	64	64	0.6667	0.8545	0.5565	0.4923
Stim	3_Junction_86349_Junction_86351*5_Junction_86348_Junction_86349	5_Junction_86348_Junction_86349	J002	0.0889057	5.6766	0.0171927	0.134515	1.3425	1.64068	1.02423	chrX	15830467	15831622	1156	-	15	16	51	66	0.3333	0.1455	0.4435	0.5077	0.172009
Arp2	3_Junction_87400_Junction_87404*5_Junction_87399_Junction_87400	3_Junction_87400_Junction_87404	J001	0.0906144	0.438557	0.50782	0.972198	1.79626	1.83182	0.119969	chrX	16444498	16446371	1874	-	13	88	104	50	0.3421	0.5641	0.6082	0.4854
Arp2	3_Junction_87400_Junction_87404*5_Junction_87399_Junction_87400	3_Junction_87400_Junction_87404	J002	0.0906356	0.438504	0.507846	0.972198	1.75502	1.71853	-0.123485	chrX	16445522	16446371	850	-	25	68	67	53	0.6579	0.4359	0.3918	0.5146
Arp2	3_Junction_87400_Junction_87404*5_Junction_87399_Junction_87400	5_Junction_87399_Junction_87400	J001	0.0166313	4.08996	0.0431387	0.255648	1.6474	1.51923	-0.437245	chrX	16444498	16445506	1009	-	15	63	49	21	0.5357	0.4172	0.3203	0.2958
Arp2	3_Junction_87400_Junction_87404*5_Junction_87399_Junction_87400	5_Junction_87399_Junction_87400	J002	0.0165464	4.09678	0.0429648	0.255378	1.75998	1.85646	0.325562	chrX	16444498	16446371	1874	-	13	88	104	50	0.4643	0.5828	0.6797	0.7042	0.114422
beta-Spec	3_Junction_88574_Junction_88575*5_Junction_88573_Junction_88574	3_Junction_88574_Junction_88575	J001	0.157018	21.4418	3.64734e-06	0.000158545	1.8552	1.09477	-2.62674	chrX	17561771	17562307	537	+	27	227	9	3	0.1414	0.3295	0.0176	0.0093
beta-Spec	3_Junction_88574_Junction_88575*5_Junction_88573_Junction_88574	3_Junction_88574_Junction_88575	J002	0.157774	21.3558	3.81471e-06	0.000163704	2.23618	2.89455	2.19362	chrX	17562190	17562307	118	+	164	462	503	318	0.8586	0.6705	0.9824	0.9907
beta-Spec	3_Junction_88574_Junction_88575*5_Junction_88573_Junction_88574	5_Junction_88573_Junction_88574	J001	0.183047	19.6454	9.32287e-06	0.000346171	2.24178	2.92992	2.29255	chrX	17561771	17562138	368	+	179	444	565	343	0.8689	0.6617	0.9843	0.9913
beta-Spec	3_Junction_88574_Junction_88575*5_Junction_88573_Junction_88574	5_Junction_88573_Junction_88574	J002	0.182241	19.7197	8.96733e-06	0.000333752	1.86417	1.08717	-2.68442	chrX	17561771	17562307	537	+	27	227	9	3	0.1311	0.3383	0.0157	0.0087	-0.130226
CG2991	3_Junction_9592_Junction_9595*5_Junction_9591_Junction_9592	3_Junction_9592_Junction_9595	J001	0.10648	6.42719	0.0112386	0.0980648	0.826252	1.23319	1.49801	chr2L	2857576	2864967	7392	+	4	5	20	21	0.2	0.1042	0.5405	0.35
CG2991	3_Junction_9592_Junction_9595*5_Junction_9591_Junction_9592	3_Junction_9592_Junction_9595	J002	0.0804501	7.57147	0.00592995	0.0620577	1.59201	1.35373	-0.819512	chr2L	2859714	2864967	5254	+	16	43	17	39	0.8	0.8958	0.4595	0.65
CG2991	3_Junction_9592_Junction_9595*5_Junction_9591_Junction_9592	5_Junction_9591_Junction_9592	J001	0.0231262	13.2693	0.000269784	0.00543169	1.45724	1.22366	-0.81358	chr2L	2857576	2859623	2048	+	20	25	17	22	0.8333	0.8333	0.4595	0.5116
CG2991	3_Junction_9592_Junction_9595*5_Junction_9591_Junction_9592	5_Junction_9591_Junction_9592	J002	0.03417	11.9118	0.000557796	0.00990233	0.814217	1.24526	1.58768	chr2L	2857576	2864967	7392	+	4	5	20	21	0.1667	0.1667	0.5405	0.4884	0.228987

## Sheet: AS A5SS events
Gene	AS_event_ID	AS_structure_ID	sub_junction_ID	sub-junction_dispersion_estimate	LRT_statistic-full_vs_reduced	LRT_p_value-full_vs_reduced	BH_adjusted_p-values	LNd	LNv	fitting_parameter_log2fold_change_LNv_LNd	sub_junction_chr	sub_junction_start_coor	sub_junction_end_coor	sub_junction_size	sub_junction_strand	raw_count.LNd_A	raw_count.LNd_B	raw_count.LNv_A	raw_count.LNv_B	percentage_usage.LNd_A	percentage_usage.LNd_B	percentage_usage.LNv_A	percentage_usage.LNv_B	deltaPSI
Shaw	3_Junction_10241_Junction_10244	3_Junction_10241_Junction_10244	J001	0.124274	30.019	4.27826e-08	2.99961e-06	0.776722	1.5087	2.65015	chr2L	3723764	3726677	2914	+	3	4	60	27	0.1364	0.1429	0.9375	0.7941	-0.72615
Shaw	3_Junction_10241_Junction_10244	3_Junction_10241_Junction_10244	J002	0.139708	27.8773	1.29256e-07	8.04295e-06	1.50126	0.682703	-3.00873	chr2L	3725196	3726677	1482	+	19	24	4	7	0.8636	0.8571	0.0625	0.2059	0.72615
Sam-S	3_Junction_1142_Junction_1158_Junction_1176	3_Junction_1142_Junction_1158_Junction_1176	J001	0.0673527	8.3659	0.00382327	0.0442867	1.74273	1.31097	-1.48023	chr2L	108101	108586	486	+	68	23	21	27	0.5152	0.3382	0.1489	0.2143	0.2451
Sam-S	3_Junction_1142_Junction_1158_Junction_1176	3_Junction_1142_Junction_1158_Junction_1176	J002	0.0145771	5.75772	0.0164164	0.130753	1.77229	1.84785	0.25498	chr2L	108226	108586	361	+	59	37	89	81	0.447	0.5441	0.6312	0.6429	-0.1415
Sam-S	3_Junction_1142_Junction_1158_Junction_1176	3_Junction_1142_Junction_1158_Junction_1176	J003	0.123363	3.2814	0.0700693	0.356742	0.953106	1.32841	1.34776	chr2L	108346	108586	241	+	5	8	31	18	0.0379	0.1176	0.2199	0.1429	-0.10365
Ih	3_Junction_15334_Junction_15337	3_Junction_15334_Junction_15337	J001	0.0840239	4.87808	0.0271999	0.184848	2.01896	2.20344	0.617638	chr2R	10179886	10184204	4319	+	123	130	135	124	0.6406	0.7345	0.8084	0.9051	-0.1692
Ih	3_Junction_15334_Junction_15337	3_Junction_15334_Junction_15337	J002	0.0827512	4.93682	0.0262904	0.180702	1.68033	1.463	-0.742072	chr2R	10181693	10184204	2512	+	69	47	32	13	0.3594	0.2655	0.1916	0.0949	0.1692
Atf6	3_Junction_15426_Junction_15439	3_Junction_15426_Junction_15439	J001	0.129838	6.30655	0.0120293	0.103022	1.16366	0.721282	-1.671	chr2R	1032363	1040292	7930	+	14	10	1	9	0.4375	0.3704	0.0357	0.1731	0.29955
Atf6	3_Junction_15426_Junction_15439	3_Junction_15426_Junction_15439	J002	0.0538682	9.27806	0.00231915	0.0302614	1.32007	1.49506	0.605152	chr2R	1036661	1040292	3632	+	18	17	27	43	0.5625	0.6296	0.9643	0.8269	-0.29955
CG43729	3_Junction_16209_Junction_16221	3_Junction_16209_Junction_16221	J001	0.13699	9.33585	0.00224714	0.0294569	1.66846	2.06782	1.34553	chr2R	11311910	11340360	28451	+	40	36	104	181	0.2837	0.5538	0.7591	0.8341	-0.37785
CG43729	3_Junction_16209_Junction_16221	3_Junction_16209_Junction_16221	J002	0.136701	9.35388	0.00222514	0.0292574	1.88584	1.47005	-1.41207	chr2R	11314132	11340360	26229	+	101	29	33	36	0.7163	0.4462	0.2409	0.1659	0.37785
CG5065	3_Junction_17278_Junction_17282_Junction_17291_Junction_17297	3_Junction_17278_Junction_17282_Junction_17291_Junction_17297	J001	0.108039	13.0385	0.000305156	0.00606414	1.96925	2.63982	2.23982	chr2R	12495839	12506307	10469	+	52	185	388	260	0.1525	0.3109	0.676	0.5778	-0.3952
CG5065	3_Junction_17278_Junction_17282_Junction_17291_Junction_17297	3_Junction_17278_Junction_17282_Junction_17291_Junction_17297	J002	0.063945	6.32991	0.0118719	0.102069	2.25655	2.31041	0.179869	chr2R	12496830	12506307	9478	+	208	265	155	152	0.61	0.4454	0.27	0.3378	0.2238
CG5065	3_Junction_17278_Junction_17282_Junction_17291_Junction_17297	3_Junction_17278_Junction_17282_Junction_17291_Junction_17297	J003	0.0442162	15.3567	8.9003e-05	0.00226049	1.75683	1.46652	-0.989025	chr2R	12500078	12506307	6230	+	41	105	19	24	0.1202	0.1765	0.0331	0.0533	0.10515
CG5065	3_Junction_17278_Junction_17282_Junction_17291_Junction_17297	3_Junction_17278_Junction_17282_Junction_17291_Junction_17297	J004	0.0560161	10.4871	0.00120213	0.0182864	1.49318	1.25827	-0.815129	chr2R	12505648	12506307	660	+	40	40	12	14	0.1173	0.0672	0.0209	0.0311	0.06625
RIC-3	3_Junction_20696_Junction_20698	3_Junction_20696_Junction_20698	J001	0.0250178	23.6183	1.17463e-06	5.86194e-05	2.14461	2.40122	0.857083	chr2R	16909638	16910937	1300	+	140	127	306	211	0.5858	0.5	0.8315	0.7844	-0.26505
RIC-3	3_Junction_20696_Junction_20698	3_Junction_20696_Junction_20698	J002	0.0246622	23.8729	1.02908e-06	5.22733e-05	2.07608	1.76748	-1.03786	chr2R	16910670	16910937	268	+	99	127	62	58	0.4142	0.5	0.1685	0.2156	0.26505
Galphao	3_Junction_29120_Junction_29130	3_Junction_29120_Junction_29130	J001	0.00703135	19.454	1.03051e-05	0.000374444	1.83373	2.02402	0.639714	chr2R	6327136	6335702	8567	+	26	72	142	145	0.3824	0.3956	0.6121	0.6067	-0.2204
Galphao	3_Junction_29120_Junction_29130	3_Junction_29120_Junction_29130	J002	0.00700415	19.4816	1.01571e-05	0.000371097	2.02312	1.83287	-0.639619	chr2R	6333129	6335702	2574	+	42	110	90	94	0.6176	0.6044	0.3879	0.3933	0.2204
CG7220	3_Junction_29532_Junction_29538	3_Junction_29532_Junction_29538	J001	0.0307621	8.46892	0.00361267	0.0422901	2.2139	2.05123	-0.544441	chr2R	6619301	6624160	4860	+	62	157	212	107	0.747	0.7476	0.6074	0.4931	0.19705
CG7220	3_Junction_29532_Junction_29538	3_Junction_29532_Junction_29538	J002	0.0303385	8.55058	0.00345412	0.0408181	1.7448	1.93516	0.641728	chr2R	6623560	6624160	601	+	21	53	137	110	0.253	0.2524	0.3926	0.5069	-0.19705
qvr	3_Junction_30357_Junction_30358	3_Junction_30357_Junction_30358	J001	0.0997474	5.14795	0.0232738	0.165745	1.40082	1.63417	0.799782	chr2R	7332920	7334659	1740	+	45	16	29	40	0.1875	0.1127	0.2636	0.4545	-0.20895
qvr	3_Junction_30357_Junction_30358	3_Junction_30357_Junction_30358	J002	0.0999916	5.13788	0.0234092	0.166412	2.1122	1.91253	-0.669844	chr2R	7333694	7334659	966	+	195	126	81	48	0.8125	0.8873	0.7364	0.5455	0.20895
CG6329	3_Junction_32406_Junction_32407_Junction_32408_Junction_32412_Junction_32416_Junction_32420	3_Junction_32406_Junction_32407_Junction_32408_Junction_32412_Junction_32416_Junction_32420	J001	0.0540192	5.3976	0.0201645	0.150893	2.27314	2.59944	1.08801	chr2R	9713986	9717143	3158	+	181	196	254	552	0.3892	0.47	0.5546	0.69	-0.1927
CG6329	3_Junction_32406_Junction_32407_Junction_32408_Junction_32412_Junction_32416_Junction_32420	3_Junction_32406_Junction_32407_Junction_32408_Junction_32412_Junction_32416_Junction_32420	J002	0.0407694	0.282975	0.594758	1	1.82814	1.90929	0.273268	chr2R	9714022	9717143	3122	+	86	50	69	91	0.1849	0.1199	0.1507	0.1138	0.02015
CG6329	3_Junction_32406_Junction_32407_Junction_32408_Junction_32412_Junction_32416_Junction_32420	3_Junction_32406_Junction_32407_Junction_32408_Junction_32412_Junction_32416_Junction_32420	J003	0.061589	1.46131	0.226722	0.708376	1.82425	1.7979	-0.0888964	chr2R	9714090	9717143	3054	+	65	68	64	58	0.1398	0.1631	0.1397	0.0725	0.04535
CG6329	3_Junction_32406_Junction_32407_Junction_32408_Junction_32412_Junction_32416_Junction_32420	3_Junction_32406_Junction_32407_Junction_32408_Junction_32412_Junction_32416_Junction_32420	J004	0.0114793	11.8202	0.000585905	0.0102549	1.87179	1.76494	-0.360436	chr2R	9714542	9717143	2602	+	75	74	49	65	0.1613	0.1775	0.107	0.0812	0.0753
CG6329	3_Junction_32406_Junction_32407_Junction_32408_Junction_32412_Junction_32416_Junction_32420	3_Junction_32406_Junction_32407_Junction_32408_Junction_32412_Junction_32416_Junction_32420	J005	0.0172185	1.64509	0.199629	0.663966	1.38992	1.39862	0.0301157	chr2R	9714914	9717143	2230	+	30	18	18	30	0.0645	0.0432	0.0393	0.0375	0.01545
CG6329	3_Junction_32406_Junction_32407_Junction_32408_Junction_32412_Junction_32416_Junction_32420	3_Junction_32406_Junction_32407_Junction_32408_Junction_32412_Junction_32416_Junction_32420	J006	0.112033	9.56644	0.00198167	0.0269529	1.29872	0.701515	-2.22929	chr2R	9716824	9717143	320	+	28	11	4	4	0.0602	0.0264	0.0087	0.005	0.03645
Mbs	3_Junction_37569_Junction_37570	3_Junction_37569_Junction_37570	J001	0.0788876	26.8534	2.19486e-07	1.29086e-05	2.09045	1.7673	-1.08659	chr3L	16057417	16059121	1705	+	107	90	84	58	0.9907	0.989	0.8155	0.6824	0.2409
Mbs	3_Junction_37569_Junction_37570	3_Junction_37569_Junction_37570	J002	0.113731	22.1357	2.54042e-06	0.00011602	0.351149	1.28398	3.87251	chr3L	16058534	16059121	588	+	1	1	19	27	0.0093	0.011	0.1845	0.3176	-0.2409
Pka-R1	3_Junction_41233_Junction_41236_Junction_41251	3_Junction_41233_Junction_41236_Junction_41251	J001	0.0836145	12.8933	0.000329768	0.0064376	1.81289	1.33022	-1.6501	chr3L	20812569	20825944	13376	+	47	24	28	48	0.5165	0.2927	0.1022	0.125	0.291
Pka-R1	3_Junction_41233_Junction_41236_Junction_41251	3_Junction_41233_Junction_41236_Junction_41251	J002	0.130349	4.64654	0.0311162	0.203477	1.73993	2.044	1.0235	chr3L	20813826	20825944	12119	+	19	39	176	230	0.2088	0.4756	0.6423	0.599	-0.27845
Pka-R1	3_Junction_41233_Junction_41236_Junction_41251	3_Junction_41233_Junction_41236_Junction_41251	J003	0.00895967	0.0748551	0.784395	1	1.61393	1.686	0.244906	chr3L	20825700	20825944	245	+	25	19	70	106	0.2747	0.2317	0.2555	0.276	-0.01255
CG17698	3_Junction_43359_Junction_43364	3_Junction_43359_Junction_43364	J001	0.0477402	14.5037	0.000139886	0.00324013	1.48715	1.82404	1.1451	chr3L	23731284	23739288	8005	+	21	27	62	103	0.1448	0.1125	0.2995	0.4328	-0.2375
CG17698	3_Junction_43359_Junction_43364	3_Junction_43359_Junction_43364	J002	0.0485048	14.3254	0.000153776	0.00348747	2.32615	2.05868	-0.894361	chr3L	23734184	23739288	5105	+	124	213	145	135	0.8552	0.8875	0.7005	0.5672	0.2375
CG11486	3_Junction_44265_Junction_44268_Junction_44275_Junction_44276_Junction_44278	3_Junction_44265_Junction_44268_Junction_44275_Junction_44276_Junction_44278	J001	0.138478	1.14918	0.283721	0.785518	1.66869	1.4264	-0.828704	chr3L	3071189	3073079	1891	+	25	34	33	47	0.0984	0.2576	0.1162	0.0794	0.0802
CG11486	3_Junction_44265_Junction_44268_Junction_44275_Junction_44276_Junction_44278	3_Junction_44265_Junction_44268_Junction_44275_Junction_44276_Junction_44278	J002	0.0277994	9.1467	0.00249168	0.0320092	1.4973	1.06685	-1.51256	chr3L	3071307	3073079	1773	+	27	13	15	18	0.1063	0.0985	0.0528	0.0304	0.0608
CG11486	3_Junction_44265_Junction_44268_Junction_44275_Junction_44276_Junction_44278	3_Junction_44265_Junction_44268_Junction_44275_Junction_44276_Junction_44278	J003	0.0111193	12.8237	0.000342257	0.00663585	1.82274	2.0301	0.697157	chr3L	3072677	3073079	403	+	57	29	98	236	0.2244	0.2197	0.3451	0.3986	-0.1498
CG11486	3_Junction_44265_Junction_44268_Junction_44275_Junction_44276_Junction_44278	3_Junction_44265_Junction_44268_Junction_44275_Junction_44276_Junction_44278	J004	0.126278	0.000406741	0.983909	1	1.69856	1.60609	-0.314181	chr3L	3072686	3073079	394	+	56	10	41	83	0.2205	0.0758	0.1444	0.1402	0.00585
CG11486	3_Junction_44265_Junction_44268_Junction_44275_Junction_44276_Junction_44278	3_Junction_44265_Junction_44268_Junction_44275_Junction_44276_Junction_44278	J005	0.00535832	0.00372391	0.95134	1	2.01665	1.99398	-0.0760619	chr3L	3072841	3073079	239	+	89	46	97	208	0.3504	0.3485	0.3415	0.3514	0.003
CG15270	3_Junction_4541_Junction_4542	3_Junction_4541_Junction_4542	J001	0.201954	5.29652	0.0213681	0.156831	1.70858	1.40502	-1.03783	chr2L	15093683	15094677	995	+	49	34	42	16	0.8596	0.7907	0.6462	0.2963	0.3539
CG15270	3_Junction_4541_Junction_4542	3_Junction_4541_Junction_4542	J002	0.213248	5.06544	0.0244076	0.171068	1.05619	1.40745	1.24193	chr2L	15094232	15094677	446	+	8	9	23	38	0.1404	0.2093	0.3538	0.7037	-0.3539
CG42540	3_Junction_45633_Junction_45644	3_Junction_45633_Junction_45644	J001	0.0342888	5.85549	0.0155285	0.125642	1.16398	0.822507	-1.26718	chr3L	4563896	4577915	14020	+	17	14	5	5	0.2742	0.2373	0.0877	0.119	0.1524
CG42540	3_Junction_45633_Junction_45644	3_Junction_45633_Junction_45644	J002	0.0194203	6.9106	0.00856862	0.0808618	1.60794	1.7129	0.356494	chr3L	4575758	4577915	2158	+	45	45	52	37	0.7258	0.7627	0.9123	0.881	-0.1524
hipk	3_Junction_46069_Junction_46073	3_Junction_46069_Junction_46073	J001	0.05568	4.47131	0.0344685	0.219067	1.71891	1.54863	-0.579206	chr3L	543277	547480	4204	+	71	28	27	47	0.5299	0.7	0.4426	0.3431	0.2221
hipk	3_Junction_46069_Junction_46073	3_Junction_46069_Junction_46073	J002	0.0556544	4.47261	0.0344423	0.21904	1.59724	1.76261	0.561144	chr3L	546198	547480	1283	+	63	12	34	90	0.4701	0.3	0.5574	0.6569	-0.2221
CG34356	3_Junction_50857_Junction_50867	3_Junction_50857_Junction_50867	J001	0.0725686	11.335	0.000760598	0.0126314	1.54136	1.81493	0.928594	chr3L	9951040	9954735	3696	+	34	32	98	30	0.7391	0.5424	0.9159	0.9091	-0.27175
CG34356	3_Junction_50857_Junction_50867	3_Junction_50857_Junction_50867	J002	0.0890088	9.97162	0.00158972	0.0229214	1.32799	0.83863	-1.78218	chr3L	9953979	9954735	757	+	12	27	9	3	0.2609	0.4576	0.0841	0.0909	0.27175
Sap47	3_Junction_53008_Junction_53009	3_Junction_53008_Junction_53009	J001	0.10751	8.98855	0.00271676	0.0340656	3.25465	2.99715	-0.856058	chr3R	11779956	11780303	348	+	1145	1803	1887	391	0.5875	0.6217	0.3722	0.1837	0.32665
Sap47	3_Junction_53008_Junction_53009	3_Junction_53008_Junction_53009	J002	0.107639	8.97791	0.00273263	0.0341142	3.06244	3.32002	0.856249	chr3R	11779977	11780303	327	+	804	1097	3183	1737	0.4125	0.3783	0.6278	0.8163	-0.32665
cpo	3_Junction_54531_Junction_54534	3_Junction_54531_Junction_54534	J001	0.0146458	10.0373	0.00153403	0.0223286	1.89628	1.72731	-0.570141	chr3R	13837435	13838868	1434	+	38	72	107	38	0.6032	0.6923	0.4632	0.4318	0.20025
cpo	3_Junction_54531_Junction_54534	3_Junction_54531_Junction_54534	J002	0.0146515	10.0355	0.00153549	0.0223335	1.61305	1.80503	0.650562	chr3R	13837872	13838868	997	+	25	32	124	50	0.3968	0.3077	0.5368	0.5682	-0.20025
CG5621	3_Junction_57596_Junction_57597	3_Junction_57596_Junction_57597	J001	0.0230605	15.6554	7.59952e-05	0.00199896	1.61524	1.33188	-0.974693	chr3R	16733083	16733653	571	+	89	36	12	15	0.7479	0.6545	0.3636	0.375	0.3319
CG5621	3_Junction_57596_Junction_57597	3_Junction_57596_Junction_57597	J002	0.0248231	15.2013	9.66356e-05	0.00242039	1.22836	1.55497	1.1321	chr3R	16733356	16733653	298	+	30	19	21	25	0.2521	0.3455	0.6364	0.625	-0.3319
CG31140	3_Junction_60566_Junction_60567	3_Junction_60566_Junction_60567	J001	0.0335659	9.07895	0.00258568	0.0328565	2.29744	2.12483	-0.576964	chr3R	19803837	19804670	834	+	97	187	195	166	0.8362	0.8095	0.6964	0.5887	0.1803
CG31140	3_Junction_60566_Junction_60567	3_Junction_60566_Junction_60567	J002	0.0329534	9.19815	0.0024226	0.0313239	1.64909	1.86683	0.736303	chr3R	19803933	19804670	738	+	19	44	85	116	0.1638	0.1905	0.3036	0.4113	-0.1803
CG11791	3_Junction_61813_Junction_61814	3_Junction_61813_Junction_61814	J001	0.151634	6.76873	0.00927689	0.0857781	2.01955	1.76747	-0.848395	chr3R	20877278	20878203	926	+	24	163	79	41	0.96	0.9702	0.8876	0.7069	0.16785
CG11791	3_Junction_61813_Junction_61814	3_Junction_61813_Junction_61814	J002	0.220259	5.17123	0.022964	0.164599	0.62716	1.12965	1.94631	chr3R	20877656	20878203	548	+	1	5	10	17	0.04	0.0298	0.1124	0.2931	-0.16785
CG11873	3_Junction_65481_Junction_65486	3_Junction_65481_Junction_65486	J001	0.0567175	7.50401	0.00615619	0.0637784	1.65619	1.43433	-0.758865	chr3R	24890334	24922952	32619	+	62	31	24	27	0.8378	0.7561	0.4528	0.6279	0.2566
CG11873	3_Junction_65481_Junction_65486	3_Junction_65481_Junction_65486	J002	0.0666707	6.79202	0.00915664	0.085001	1.06449	1.38865	1.14671	chr3R	24914569	24922952	8384	+	12	10	29	16	0.1622	0.2439	0.5472	0.3721	-0.2566
kay	3_Junction_65946_Junction_65949	3_Junction_65946_Junction_65949	J001	0.0313124	13.8238	0.000200773	0.00428028	1.35669	1.10074	-0.904539	chr3R	25599543	25617113	17571	+	18	17	16	13	0.9	0.85	0.4848	0.4643	0.40045
kay	3_Junction_65946_Junction_65949	3_Junction_65946_Junction_65949	J002	0.0545857	11.7957	0.000593685	0.0103582	0.613783	1.14051	2.04367	chr3R	25608869	25617113	8245	+	2	3	17	15	0.1	0.15	0.5152	0.5357	-0.40045
hdc	3_Junction_66314_Junction_66434	3_Junction_66314_Junction_66434	J001	0.424611	10.9369	0.000942676	0.0150164	1.26282	1.92685	2.26966	chr3R	25976779	26160672	183894	+	26	10	75	91	0.619	0.2128	0.9868	0.9286	-0.5418
hdc	3_Junction_66314_Junction_66434	3_Junction_66314_Junction_66434	J002	0.453384	10.3443	0.00129878	0.019437	1.44244	0.69013	-2.77545	chr3R	26134412	26160672	26261	+	16	37	1	7	0.381	0.7872	0.0132	0.0714	0.5418
pros	3_Junction_71411_Junction_71423_Junction_71434_Junction_71441	3_Junction_71411_Junction_71423_Junction_71434_Junction_71441	J001	0.0594061	1.35804	0.243877	0.731942	1.91697	1.71421	-0.684126	chr3R	7155678	7165378	9701	+	340	52	25	19	0.3807	0.2723	0.2941	0.1845	0.0872
pros	3_Junction_71411_Junction_71423_Junction_71434_Junction_71441	3_Junction_71411_Junction_71423_Junction_71434_Junction_71441	J002	0.0264332	4.25646	0.0391013	0.239344	1.7869	1.92391	0.461604	chr3R	7159275	7165378	6104	+	242	45	27	46	0.271	0.2356	0.3176	0.4466	-0.1288
pros	3_Junction_71411_Junction_71423_Junction_71434_Junction_71441	3_Junction_71411_Junction_71423_Junction_71434_Junction_71441	J003	0.0632258	0.193859	0.659724	1	1.83478	1.81335	-0.0722477	chr3R	7161344	7165378	4035	+	238	81	26	30	0.2665	0.4241	0.3059	0.2913	0.0467
pros	3_Junction_71411_Junction_71423_Junction_71434_Junction_71441	3_Junction_71411_Junction_71423_Junction_71434_Junction_71441	J004	0.0148675	0.00851206	0.926491	1	1.2861	1.25921	-0.0943583	chr3R	7162787	7165378	2592	+	73	13	7	8	0.0817	0.0681	0.0824	0.0777	-0.00515
beat-Vb	3_Junction_72845_Junction_72847	3_Junction_72845_Junction_72847	J001	0.035186	5.62855	0.0176702	0.137457	1.18503	0.862151	-1.1883	chr3R	8741865	8744164	2300	+	18	18	8	2	0.2222	0.2222	0.1194	0.0465	0.13925
beat-Vb	3_Junction_72845_Junction_72847	3_Junction_72845_Junction_72847	J002	0.0210797	6.49843	0.010797	0.0950022	1.70864	1.80578	0.328477	chr3R	8742126	8744164	2039	+	63	63	59	41	0.7778	0.7778	0.8806	0.9535	-0.13925
B52	3_Junction_73433_Junction_73438	3_Junction_73433_Junction_73438	J001	0.0145121	32.9125	9.64007e-09	8.41899e-07	2.16702	2.43131	0.882459	chr3R	9488773	9491173	2401	+	89	163	422	181	0.4341	0.3575	0.6862	0.6606	-0.2776
B52	3_Junction_73433_Junction_73438	3_Junction_73433_Junction_73438	J002	0.0145339	32.8758	9.82374e-09	8.54193e-07	2.37985	2.10597	-0.915134	chr3R	9490656	9491173	518	+	116	293	193	93	0.5659	0.6425	0.3138	0.3394	0.2776
toy	3_Junction_74294_Junction_74296	3_Junction_74294_Junction_74296	J001	0.0496719	5.92267	0.0149473	0.12213	2.6751	2.49071	-0.614142	chr4	1019319	1024782	5464	+	387	423	345	376	0.5899	0.5883	0.3215	0.4706	0.19305
toy	3_Junction_74294_Junction_74296	3_Junction_74294_Junction_74296	J002	0.0496864	5.92102	0.0149613	0.122149	2.51909	2.70298	0.612378	chr4	1019331	1024782	5452	+	269	296	728	423	0.4101	0.4117	0.6785	0.5294	-0.19305
pan	3_Junction_74439_Junction_74559	3_Junction_74439_Junction_74559	J001	0.235683	9.51479	0.00203823	0.0274968	2.11491	1.62112	-1.66414	chr4	107792	115047	7256	+	152	246	36	15	0.6909	0.7365	0.36	0.0949	0.48625
pan	3_Junction_74439_Junction_74559	3_Junction_74439_Junction_74559	J002	0.234574	9.55714	0.00199174	0.0270344	1.71043	2.19833	1.63996	chr4	113899	115047	1149	+	68	88	64	143	0.3091	0.2635	0.64	0.9051	-0.48625
dlg1	3_Junction_79441_Junction_79454	3_Junction_79441_Junction_79454	J001	0.0420637	5.32952	0.0209672	0.154916	2.39898	2.27838	-0.402467	chrX	11263832	11267848	4017	+	371	93	155	274	0.7405	0.8532	0.6352	0.6402	0.15915
dlg1	3_Junction_79441_Junction_79454	3_Junction_79441_Junction_79454	J002	0.041561	5.37329	0.0204473	0.152289	1.89923	2.03399	0.452568	chrX	11267122	11267848	727	+	130	16	89	154	0.2595	0.1468	0.3648	0.3598	-0.15915
Tomosyn	3_Junction_80788_Junction_80794	3_Junction_80788_Junction_80794	J001	0.18604	6.62476	0.0100571	0.0905207	1.77757	1.38548	-1.33886	chrX	12538800	12545141	6342	+	32	78	16	34	0.5614	0.78	0.1778	0.3864	0.3886
Tomosyn	3_Junction_80788_Junction_80794	3_Junction_80788_Junction_80794	J002	0.186059	6.62417	0.0100604	0.0905207	1.40685	1.79713	1.33094	chrX	12542816	12545141	2326	+	25	22	74	54	0.4386	0.22	0.8222	0.6136	-0.3886
rad	3_Junction_81263_Junction_81265	3_Junction_81263_Junction_81265	J001	0.0358344	10.9857	0.000918196	0.0147123	1.34942	1.50652	0.542222	chrX	12967115	12968446	1332	+	15	25	26	41	0.6	0.6944	0.963	0.8913	-0.27995
rad	3_Junction_81263_Junction_81265	3_Junction_81263_Junction_81265	J002	0.0967334	7.83173	0.00513369	0.0553449	1.08499	0.576844	-2.0083	chrX	12967121	12968446	1326	+	10	11	1	5	0.4	0.3056	0.037	0.1087	0.27995
CG1640	3_Junction_81631_Junction_81658	3_Junction_81631_Junction_81658	J001	0.0695783	4.09487	0.0430136	0.25553	1.43836	1.25611	-0.63417	chrX	13265400	13267894	2495	+	11	20	37	20	0.7857	0.7407	0.5968	0.4082	0.2607
CG1640	3_Junction_81631_Junction_81658	3_Junction_81631_Junction_81658	J002	0.0790178	3.85719	0.0495333	0.282205	0.977835	1.22635	0.897657	chrX	13266679	13267894	1216	+	3	7	25	29	0.2143	0.2593	0.4032	0.5918	-0.2607
dpr8	3_Junction_83702_Junction_83705	3_Junction_83702_Junction_83705	J001	0.0140557	4.21688	0.0400238	0.243122	1.46501	1.59378	0.440825	chrX	14216948	14249494	32547	+	13	38	33	52	0.5	0.4578	0.6226	0.6341	-0.14945
dpr8	3_Junction_83702_Junction_83705	3_Junction_83702_Junction_83705	J002	0.0144249	4.17983	0.0409079	0.24721	1.51998	1.37171	-0.51093	chrX	14218891	14249494	30604	+	13	45	20	30	0.5	0.5422	0.3774	0.3659	0.14945
Nup153	3_Junction_87484_Junction_87485	3_Junction_87484_Junction_87485	J001	0.0222597	5.70264	0.0169395	0.133349	1.48405	1.32271	-0.558135	chrX	16500041	16501964	1924	+	18	24	36	20	0.7826	0.7273	0.5	0.5714	0.21925
Nup153	3_Junction_87484_Junction_87485	3_Junction_87484_Junction_87485	J002	0.027662	5.32721	0.020995	0.155061	1.03432	1.28607	0.899496	chrX	16501032	16501964	933	+	5	9	36	15	0.2174	0.2727	0.5	0.4286	-0.21925
NONE	3_Junction_87804_Junction_87807	3_Junction_87804_Junction_87807	J001	0.0626854	10.6328	0.00111099	0.0171888	0.658955	1.2109	2.09908	chrX	16794185	16800250	6066	+	6	4	10	12	0.0517	0.1	0.2941	0.3	-0.2212
NONE	3_Junction_87804_Junction_87807	3_Junction_87804_Junction_87807	J002	0.0244518	15.2501	9.41697e-05	0.00237055	1.7175	1.56897	-0.504964	chrX	16795756	16800250	4495	+	110	36	24	28	0.9483	0.9	0.7059	0.7	0.2212
f	3_Junction_88092_Junction_88166	3_Junction_88092_Junction_88166	J001	0.127874	11.0716	0.000876615	0.0142027	1.94049	2.36284	1.41338	chrX	17174518	17339702	165185	+	199	86	101	190	0.6317	0.835	0.9528	0.9548	-0.22045
f	3_Junction_88092_Junction_88166	3_Junction_88092_Junction_88166	J002	0.126645	11.16	0.000835805	0.0136526	1.60745	1.0845	-1.82507	chrX	17303241	17339702	36462	+	116	17	5	9	0.3683	0.165	0.0472	0.0452	0.22045
NONE	3_Junction_88922_Junction_88940	3_Junction_88922_Junction_88940	J001	0.0566855	5.87023	0.015399	0.124721	1.13509	0.786283	-1.30664	chrX	17831609	17864127	32519	+	10	16	4	6	0.4545	0.4706	0.1333	0.25	0.2709
NONE	3_Junction_88922_Junction_88940	3_Junction_88922_Junction_88940	J002	0.0340566	7.00785	0.00811529	0.0780636	1.1921	1.37537	0.6425	chrX	17837408	17864127	26720	+	12	18	26	18	0.5455	0.5294	0.8667	0.75	-0.2709
Hers	3_Junction_91612_Junction_91628	3_Junction_91612_Junction_91628	J001	0.329453	6.91131	0.0085652	0.0808618	1.65555	1.21418	-1.52485	chrX	19766477	19794647	28171	+	11	38	41	11	0.9167	0.8261	0.5325	0.1642	0.52305
Hers	3_Junction_91612_Junction_91628	3_Junction_91612_Junction_91628	J002	0.333182	6.85153	0.00885656	0.0830969	0.959713	1.42788	1.66799	chrX	19787990	19794647	6658	+	1	8	36	56	0.0833	0.1739	0.4675	0.8358	-0.52305
slgA	3_Junction_92474_Junction_92495	3_Junction_92474_Junction_92495	J001	0.0241966	5.60031	0.0179573	0.138969	1.76937	1.63831	-0.444192	chrX	21255063	21298810	43748	+	42	57	64	34	0.7241	0.7703	0.6214	0.5152	0.1789
slgA	3_Junction_92474_Junction_92495	3_Junction_92474_Junction_92495	J002	0.0255553	5.47136	0.0193306	0.146632	1.30461	1.49818	0.669851	chrX	21293206	21298810	5605	+	16	17	39	32	0.2759	0.2297	0.3786	0.4848	-0.1789
lilli	3_Junction_9513_Junction_9544_Junction_9549	3_Junction_9513_Junction_9544_Junction_9549	J001	0.0995437	2.15881	0.141754	0.552432	1.50032	1.89544	1.34039	chr2L	2788240	2935924	147685	+	38	20	54	117	0.1254	0.2985	0.3273	0.325	-0.1142
lilli	3_Junction_9513_Junction_9544_Junction_9549	3_Junction_9513_Junction_9544_Junction_9549	J002	0.0134481	8.27578	0.00401774	0.0460572	1.48627	1.26789	-0.757622	chr2L	2814254	2935924	121671	+	46	10	13	25	0.1518	0.1493	0.0788	0.0694	0.07645
lilli	3_Junction_9513_Junction_9544_Junction_9549	3_Junction_9513_Junction_9544_Junction_9549	J003	0.0497742	0.44674	0.503887	0.970767	2.12434	2.15933	0.117069	chr2L	2817986	2935924	117939	+	219	37	98	218	0.7228	0.5522	0.5939	0.6056	0.03775
Plc21C	3_Junction_9820_Junction_9841	3_Junction_9820_Junction_9841	J001	0.0899905	9.71316	0.00182953	0.0253688	1.4005	0.975914	-1.51309	chr2L	306389	317741	11353	+	14	23	11	11	0.5185	0.4792	0.2391	0.1009	0.32885
Plc21C	3_Junction_9820_Junction_9841	3_Junction_9820_Junction_9841	J002	0.0773204	10.7347	0.00105145	0.0163822	1.4125	1.7052	1.00053	chr2L	310605	317741	7137	+	13	25	35	98	0.4815	0.5208	0.7609	0.8991	-0.32885
RpL17	5_Junction_100112_Junction_100114	5_Junction_100112_Junction_100114	J001	0.0922998	4.52	0.0335009	0.214976	2.08992	1.91611	-0.583214	chrX	6637181	6638140	960	-	79	131	94	93	0.5232	0.309	0.1858	0.2319	0.20725
RpL17	5_Junction_100112_Junction_100114	5_Junction_100112_Junction_100114	J002	0.0926072	4.50652	0.0337659	0.215911	2.33746	2.50225	0.549548	chrX	6637181	6638227	1047	-	72	293	412	308	0.4768	0.691	0.8142	0.7681	-0.20725
Lim1	5_Junction_103038_Junction_103039	5_Junction_103038_Junction_103039	J001	0.0126236	12.3835	0.000433154	0.00805318	1.74742	1.89191	0.487379	chrX	8662975	8679215	16241	-	51	31	131	75	0.6375	0.6458	0.8452	0.8242	-0.19305
Lim1	5_Junction_103038_Junction_103039	5_Junction_103038_Junction_103039	J002	0.0140343	11.9827	0.000536954	0.00959637	1.50275	1.19845	-1.05917	chrX	8662975	8681641	18667	-	29	17	24	16	0.3625	0.3542	0.1548	0.1758	0.19305
Moe	5_Junction_103250_Junction_103251	5_Junction_103250_Junction_103251	J001	0.0107692	4.43475	0.0352145	0.222177	1.38833	1.56053	0.592022	chrX	8774433	8791870	17438	-	12	14	40	90	0.2182	0.175	0.292	0.3082	-0.1035
Moe	5_Junction_103250_Junction_103251	5_Junction_103250_Junction_103251	J002	0.0108207	4.42804	0.035353	0.222698	1.99924	1.91404	-0.286195	chrX	8774433	8792215	17783	-	43	66	97	202	0.7818	0.825	0.708	0.6918	0.1035
NONE	5_Junction_104002_Junction_104003	5_Junction_104002_Junction_104003	J001	0.0169881	60.4022	7.73283e-15	2.026e-12	0.833914	1.7996	3.41354	chrX	9513	17949	8437	-	1	2	266	215	0.0385	0.0571	0.641	0.5923	-0.56885
NONE	5_Junction_104002_Junction_104003	5_Junction_104002_Junction_104003	J002	0.0167497	60.6323	6.87943e-15	1.82644e-12	2.05665	1.5916	-1.56954	chrX	9513	18005	8493	-	25	33	149	148	0.9615	0.9429	0.359	0.4077	0.56885
chic	5_Junction_11781_Junction_11793	5_Junction_11781_Junction_11793	J001	0.0535047	4.1115	0.0425925	0.254001	2.78756	2.64141	-0.486445	chr2L	5979704	5979938	235	-	554	256	824	504	0.8576	0.7734	0.7324	0.652	0.1233
chic	5_Junction_11781_Junction_11793	5_Junction_11781_Junction_11793	J002	0.0537394	4.09477	0.043016	0.25553	2.11141	2.26948	0.528507	chr2L	5979704	5980949	1246	-	92	75	301	269	0.1424	0.2266	0.2676	0.348	-0.1233
Nckx30C	5_Junction_14599_Junction_14600	5_Junction_14599_Junction_14600	J001	0.0210463	5.78799	0.016136	0.129199	1.9831	2.1272	0.48299	chr2L	9727256	9732914	5659	-	60	185	129	71	0.4959	0.4022	0.5708	0.6174	-0.14505
Nckx30C	5_Junction_14599_Junction_14600	5_Junction_14599_Junction_14600	J002	0.0211233	5.7726	0.016278	0.129963	2.12246	1.97748	-0.48597	chr2L	9727256	9732953	5698	-	61	275	97	44	0.5041	0.5978	0.4292	0.3826	0.14505
sbb	5_Junction_18742_Junction_18743	5_Junction_18742_Junction_18743	J001	0.0333012	10.2242	0.00138614	0.0204905	1.20341	0.736692	-1.74935	chr2R	14243560	14244595	1036	-	17	13	4	5	0.1932	0.1831	0.0606	0.045	0.13535
sbb	5_Junction_18742_Junction_18743	5_Junction_18742_Junction_18743	J002	0.0180211	12.2486	0.000465601	0.00850554	1.81556	1.92143	0.356538	chr2R	14243560	14244641	1082	-	71	58	62	106	0.8068	0.8169	0.9394	0.955	-0.13535
hts	5_Junction_19630_Junction_19631	5_Junction_19630_Junction_19631	J001	0.351905	4.9476	0.026127	0.179827	1.86684	2.28133	1.38906	chr2R	15306110	15311097	4988	-	39	107	163	209	0.4239	0.856	0.9422	0.9457	-0.304
hts	5_Junction_19630_Junction_19631	5_Junction_19630_Junction_19631	J002	0.355154	4.90487	0.0267811	0.183004	1.53672	1.089	-1.56735	chr2R	15306110	15312326	6217	-	53	18	10	12	0.5761	0.144	0.0578	0.0543	0.304
HmgZ	5_Junction_21383_Junction_21384_Junction_21386	5_Junction_21383_Junction_21384_Junction_21386	J001	0.0234628	2.58186	0.108094	0.470156	1.5151	1.32146	-0.669018	chr2R	17586105	17590176	4072	-	26	26	26	23	0.0547	0.0349	0.0251	0.0301	0.0172
HmgZ	5_Junction_21383_Junction_21384_Junction_21386	5_Junction_21383_Junction_21384_Junction_21386	J002	0.00316949	36.765	1.3326e-09	1.45795e-07	2.71851	2.59731	-0.40352	chr2R	17586105	17590180	4076	-	330	518	547	416	0.6947	0.6944	0.5285	0.5445	0.15805
HmgZ	5_Junction_21383_Junction_21384_Junction_21386	5_Junction_21383_Junction_21384_Junction_21386	J003	0.00435647	40.0133	2.52239e-10	3.28273e-08	2.29718	2.51087	0.712701	chr2R	17586105	17591826	5722	-	119	202	462	325	0.2505	0.2708	0.4464	0.4254	-0.17525
Liprin-gamma	5_Junction_21657_Junction_21660	5_Junction_21657_Junction_21660	J001	0.0828197	15.7447	7.24922e-05	0.00193494	1.86544	1.62225	-0.822932	chr2R	18232798	18233547	750	-	70	103	42	25	0.9459	0.981	0.7925	0.641	0.2467
Liprin-gamma	5_Junction_21657_Junction_21660	5_Junction_21657_Junction_21660	J002	0.155199	10.8966	0.000963421	0.015298	0.5395	1.20287	2.60181	chr2R	18232798	18247757	14960	-	4	2	11	14	0.0541	0.019	0.2075	0.359	-0.2467
gol	5_Junction_24113_Junction_24115	5_Junction_24113_Junction_24115	J001	0.0685814	9.53755	0.0020131	0.0272316	1.2741	0.83345	-1.61388	chr2R	20965529	20966236	708	-	16	16	7	6	0.3721	0.2623	0.1228	0.06	0.2258
gol	5_Junction_24113_Junction_24115	5_Junction_24113_Junction_24115	J002	0.0471197	11.5642	0.000672353	0.0115314	1.61746	1.80836	0.646785	chr2R	20965529	20971386	5858	-	27	45	50	94	0.6279	0.7377	0.8772	0.94	-0.2258
mim	5_Junction_24701_Junction_24702	5_Junction_24701_Junction_24702	J001	0.0369209	21.4222	3.68484e-06	0.000158815	1.42867	0.876054	-1.9869	chr2R	2821685	2821852	168	-	15	51	9	1	0.4286	0.4474	0.1343	0.0263	0.3577
mim	5_Junction_24701_Junction_24702	5_Junction_24701_Junction_24702	J002	0.0313866	22.8392	1.76138e-06	8.53349e-05	1.52473	1.80003	0.935216	chr2R	2821685	2822309	625	-	20	63	58	37	0.5714	0.5526	0.8657	0.9737	-0.3577
CG45093	5_Junction_25760_Junction_25763	5_Junction_25760_Junction_25763	J001	0.0131751	9.78995	0.00175469	0.0246572	1.898	1.75198	-0.492479	chr2R	3629425	3632383	2959	-	84	45	72	64	0.6774	0.7627	0.5217	0.5161	0.20115
CG45093	5_Junction_25760_Junction_25763	5_Junction_25760_Junction_25763	J002	0.0131997	9.7833	0.00176104	0.0246942	1.52739	1.71918	0.652792	chr2R	3629425	3645538	16114	-	40	14	66	60	0.3226	0.2373	0.4783	0.4839	-0.20115
CG17977	5_Junction_26132_Junction_26133	5_Junction_26132_Junction_26133	J001	0.0713911	12.7128	0.000363153	0.00696637	2.0125	1.75672	-0.861091	chr2R	3954798	3954846	49	-	71	60	108	65	0.9467	0.9524	0.8	0.6566	0.22125
CG17977	5_Junction_26132_Junction_26133	5_Junction_26132_Junction_26133	J002	0.0821309	11.7379	0.00061241	0.0106037	0.809414	1.30823	1.8274	chr2R	3954798	3954911	114	-	4	3	27	34	0.0533	0.0476	0.2	0.3434	-0.22125
stmA	5_Junction_26914_Junction_26915	5_Junction_26914_Junction_26915	J001	0.0537303	31.1063	2.44278e-08	1.86363e-06	0.961483	1.58339	2.19471	chr2R	4620385	4620805	421	-	9	5	51	36	0.06	0.0314	0.2948	0.4138	-0.3086
stmA	5_Junction_26914_Junction_26915	5_Junction_26914_Junction_26915	J002	0.0519972	31.7375	1.76482e-08	1.40564e-06	2.24147	1.88339	-1.20024	chr2R	4620385	4621295	911	-	141	154	122	51	0.94	0.9686	0.7052	0.5862	0.3086
hig	5_Junction_27521_Junction_27522	5_Junction_27521_Junction_27522	J001	0.0218131	7.95771	0.0047883	0.0526766	1.50283	1.24205	-0.905305	chr2R	5118153	5118609	457	-	13	48	18	15	0.3714	0.3721	0.1565	0.2344	0.1763
hig	5_Junction_27521_Junction_27522	5_Junction_27521_Junction_27522	J002	0.0204513	8.19381	0.00420335	0.047745	1.72658	1.87459	0.499627	chr2R	5118153	5119251	1099	-	22	81	97	49	0.6286	0.6279	0.8435	0.7656	-0.1763
CG13954	5_Junction_27665_Junction_27666_Junction_27667	5_Junction_27665_Junction_27666_Junction_27667	J001	0.135268	0.405982	0.524016	0.978939	2.18691	2.02182	-0.552812	chr2R	5238678	5238912	235	-	99	86	192	151	0.1554	0.3675	0.1994	0.1754	0.07405
CG13954	5_Junction_27665_Junction_27666_Junction_27667	5_Junction_27665_Junction_27666_Junction_27667	J002	0.0873225	0.216013	0.642094	1	2.51007	2.30565	-0.681757	chr2R	5238678	5238944	267	-	332	72	341	326	0.5212	0.3077	0.3541	0.3786	0.0481
CG13954	5_Junction_27665_Junction_27666_Junction_27667	5_Junction_27665_Junction_27666_Junction_27667	J003	0.00319356	19.0477	1.2749e-05	0.000445542	2.36599	2.39111	0.0837862	chr2R	5238678	5238965	288	-	206	76	430	384	0.3234	0.3248	0.4465	0.446	-0.12215
bun	5_Junction_3018_Junction_3020	5_Junction_3018_Junction_3020	J001	0.0435231	6.11042	0.0134387	0.112576	2.58957	2.75147	0.538999	chr2L	12458223	12460587	2365	-	338	349	649	621	0.664	0.562	0.7409	0.8034	-0.15915
bun	5_Junction_3018_Junction_3020	5_Junction_3018_Junction_3020	J002	0.0437113	6.08604	0.0136254	0.1139	2.40458	2.23296	-0.572895	chr2L	12458223	12477113	18891	-	171	272	227	152	0.336	0.438	0.2591	0.1966	0.15915
bun	5_Junction_3030_Junction_3031	5_Junction_3030_Junction_3031	J001	0.021287	35.7268	2.2702e-09	2.27157e-07	1.5573	0.970209	-2.07316	chr2L	12477166	12516482	39317	-	19	70	8	5	0.6333	0.6195	0.1176	0.1923	0.47145
bun	5_Junction_3030_Junction_3031	5_Junction_3030_Junction_3031	J002	0.0207806	36.0427	1.93039e-09	1.9916e-07	1.34619	1.73082	1.31717	chr2L	12477166	12536273	59108	-	11	43	60	21	0.3667	0.3805	0.8824	0.8077	-0.47145
Nacalpha	5_Junction_31585_Junction_31586_Junction_31587	5_Junction_31585_Junction_31586_Junction_31587	J001	0.0910718	1.23846	0.265769	0.763084	1.53361	1.63974	0.361971	chr2R	8648026	8648230	205	-	15	40	44	58	0.3191	0.5797	0.5789	0.6042	-0.14215
Nacalpha	5_Junction_31585_Junction_31586_Junction_31587	5_Junction_31585_Junction_31586_Junction_31587	J002	0.0229227	1.00006	0.317297	0.827398	1.18085	1.31646	0.477523	chr2R	8648026	8648304	279	-	12	12	22	25	0.2553	0.1739	0.2895	0.2604	-0.06035
Nacalpha	5_Junction_31585_Junction_31586_Junction_31587	5_Junction_31585_Junction_31586_Junction_31587	J003	0.0642501	6.00836	0.0142383	0.117835	1.35805	1.02661	-1.17886	chr2R	8648026	8648308	283	-	20	17	10	13	0.4255	0.2464	0.1316	0.1354	0.20245
CG32103	5_Junction_35149_Junction_35153	5_Junction_35149_Junction_35153	J001	0.0958393	8.97896	0.00273106	0.0341142	1.71706	1.35109	-1.25353	chr3L	12398260	12401208	2949	-	33	89	20	15	0.4648	0.6953	0.2174	0.2632	0.33975
CG32103	5_Junction_35149_Junction_35153	5_Junction_35149_Junction_35153	J002	0.0958069	8.98143	0.00272738	0.0341128	1.51225	1.85508	1.1636	chr3L	12398260	12405109	6850	-	38	39	72	42	0.5352	0.3047	0.7826	0.7368	-0.33975
CG7971	5_Junction_38206_Junction_38208	5_Junction_38206_Junction_38208	J001	0.0101809	11.8844	0.000566052	0.01001	2.00874	1.84302	-0.557151	chr3L	1664021	1664088	68	-	96	158	55	54	0.3951	0.3405	0.2218	0.2298	0.142
CG7971	5_Junction_38206_Junction_38208	5_Junction_38206_Junction_38208	J002	0.010348	11.7847	0.000597183	0.0103778	2.26117	2.37535	0.381119	chr3L	1664021	1664530	510	-	147	306	193	181	0.6049	0.6595	0.7782	0.7702	-0.142
drpr	5_Junction_38591_Junction_38592	5_Junction_38591_Junction_38592	J001	0.259929	16.885	3.97148e-05	0.00115445	1.03485	1.7388	2.45158	chr3L	1716556	1716673	118	-	5	2	148	160	0.1	0.0435	0.5564	0.8466	-0.62975
drpr	5_Junction_38591_Junction_38592	5_Junction_38591_Junction_38592	J002	0.259839	16.8899	3.96127e-05	0.00115317	2.10633	1.44507	-2.23807	chr3L	1716556	1716795	240	-	45	44	118	29	0.9	0.9565	0.4436	0.1534	0.62975
Eip75B	5_Junction_39097_Junction_39098	5_Junction_39097_Junction_39098	J001	0.0879669	4.50078	0.0338794	0.216488	1.58486	1.80199	0.736378	chr3L	17952720	17954103	1384	-	41	59	30	65	0.7736	0.5842	0.8333	0.8904	-0.18295
Eip75B	5_Junction_39097_Junction_39098	5_Junction_39097_Junction_39098	J002	0.0953633	4.23936	0.0394971	0.241026	1.33295	1.01458	-1.13572	chr3L	17952720	17962461	9742	-	12	42	6	8	0.2264	0.4158	0.1667	0.1096	0.18295
CG13937	5_Junction_39636_Junction_39637	5_Junction_39636_Junction_39637	J001	0.081729	10.7659	0.00103386	0.016146	1.96801	1.66639	-1.01779	chr3L	1878039	1878354	316	-	97	114	39	40	0.708	0.5205	0.2335	0.3101	0.34245
CG13937	5_Junction_39636_Junction_39637	5_Junction_39636_Junction_39637	J002	0.0819407	10.7424	0.00104706	0.0163265	1.81516	2.10508	0.974002	chr3L	1878039	1881127	3089	-	40	105	128	89	0.292	0.4795	0.7665	0.6899	-0.34245
jim	5_Junction_42797_Junction_42798	5_Junction_42797_Junction_42798	J001	0.0137271	4.9084	0.0267264	0.182912	1.67367	1.81172	0.46709	chr3L	22794841	22817139	22299	-	87	64	20	60	0.262	0.3168	0.4	0.4138	-0.1175
jim	5_Junction_42797_Junction_42798	5_Junction_42797_Junction_42798	J002	0.0140857	4.8432	0.0277553	0.187661	2.06931	1.96632	-0.345461	chr3L	22794841	22825035	30195	-	245	138	30	85	0.738	0.6832	0.6	0.5862	0.1175
shep	5_Junction_45930_Junction_45931	5_Junction_45930_Junction_45931	J001	0.00684333	6.38189	0.0115291	0.099855	1.85282	1.96309	0.370915	chr3L	5160159	5161342	1184	-	55	68	114	94	0.3793	0.4024	0.5182	0.5027	-0.1196
shep	5_Junction_45930_Junction_45931	5_Junction_45930_Junction_45931	J002	0.00690437	6.3607	0.0116676	0.100748	2.04171	1.94364	-0.32914	chr3L	5160159	5161348	1190	-	90	101	106	93	0.6207	0.5976	0.4818	0.4973	0.1196
shep	5_Junction_45939_Junction_45941_Junction_45943	5_Junction_45939_Junction_45941_Junction_45943	J001	0.182206	0.648777	0.42055	0.921029	1.79411	1.77675	-0.0586142	chr3L	5163540	5177313	13774	-	31	87	81	35	0.1856	0.4439	0.2596	0.1577	0.1061
shep	5_Junction_45939_Junction_45941_Junction_45943	5_Junction_45939_Junction_45941_Junction_45943	J002	0.447096	2.96578	0.0850436	0.406673	1.6321	2.18659	1.8666	chr3L	5163540	5194163	30624	-	71	15	149	161	0.4251	0.0765	0.4776	0.7252	-0.3506
shep	5_Junction_45939_Junction_45941_Junction_45943	5_Junction_45939_Junction_45941_Junction_45943	J003	0.133525	5.07265	0.0243062	0.170598	1.91496	1.74911	-0.559229	chr3L	5163540	5212048	48509	-	65	94	82	26	0.3892	0.4796	0.2628	0.1171	0.24445
unc-13-4A	5_Junction_47882_Junction_47884	5_Junction_47882_Junction_47884	J001	0.0630905	12.3565	0.000439459	0.00811736	2.00362	1.78945	-0.720676	chr3L	7305330	7305838	509	-	190	88	62	25	0.9548	0.9167	0.7949	0.6579	0.20935
unc-13-4A	5_Junction_47882_Junction_47884	5_Junction_47882_Junction_47884	J002	0.0860591	10.2842	0.00134177	0.0199532	0.857876	1.31792	1.67256	chr3L	7305330	7306040	711	-	9	8	16	13	0.0452	0.0833	0.2051	0.3421	-0.20935
Pdp1	5_Junction_48391_Junction_48394	5_Junction_48391_Junction_48394	J001	0.0366939	28.6626	8.61523e-08	5.56969e-06	1.32897	0.364096	-3.95307	chr3L	7847289	7848307	1019	-	13	40	1	1	0.1757	0.2326	0.0088	0.0161	0.1917
Pdp1	5_Junction_48391_Junction_48394	5_Junction_48391_Junction_48394	J002	0.0271656	31.6791	1.81868e-08	1.44277e-06	1.87596	2.06984	0.651061	chr3L	7847289	7848377	1089	-	61	132	113	61	0.8243	0.7674	0.9912	0.9839	-0.1917
Argk	5_Junction_49552_Junction_49554_Junction_49559	5_Junction_49552_Junction_49554_Junction_49559	J001	0.0251075	5.79556	0.0160667	0.128793	1.57578	1.66414	0.300752	chr3L	9043459	9044228	770	-	21	37	67	46	0.0352	0.0309	0.0754	0.0504	-0.02985
Argk	5_Junction_49552_Junction_49554_Junction_49559	5_Junction_49552_Junction_49554_Junction_49559	J002	0.272825	1.5669	0.210657	0.681398	2.81189	2.3109	-1.66909	chr3L	9043459	9050641	7183	-	191	802	329	172	0.3199	0.6706	0.3701	0.1884	0.216
Argk	5_Junction_49552_Junction_49554_Junction_49559	5_Junction_49552_Junction_49554_Junction_49559	J003	0.271754	1.11289	0.291454	0.797157	2.66882	2.66917	0.00115893	chr3L	9043459	9057562	14104	-	385	357	493	695	0.6449	0.2985	0.5546	0.7612	-0.1862
PRL-1	5_Junction_4956_Junction_4957_Junction_4959	5_Junction_4956_Junction_4957_Junction_4959	J001	0.0690442	1.38283	0.23962	0.725217	2.17808	2.12811	-0.167203	chr2L	16250158	16251239	1082	-	123	25	176	399	0.2269	0.1429	0.2157	0.3218	-0.08385
PRL-1	5_Junction_4956_Junction_4957_Junction_4959	5_Junction_4956_Junction_4957_Junction_4959	J002	0.0230046	14.1411	0.000169602	0.00373575	1.89436	2.07587	0.609318	chr2L	16250158	16251622	1465	-	54	21	171	335	0.0996	0.12	0.2096	0.2702	-0.1301
PRL-1	5_Junction_4956_Junction_4957_Junction_4959	5_Junction_4956_Junction_4957_Junction_4959	J003	0.0668484	5.53746	0.0186136	0.142661	2.70244	2.36713	-1.11724	chr2L	16250158	16257074	6917	-	365	129	469	506	0.6734	0.7371	0.5748	0.4081	0.2138
Fer2	5_Junction_53200_Junction_53201	5_Junction_53200_Junction_53201	J001	0.00786284	13.4487	0.000245174	0.00501221	1.57715	1.86793	0.98497	chr3R	11975904	11976012	109	-	9	9	230	376	0.0968	0.1915	0.2864	0.2859	-0.142
Fer2	5_Junction_53200_Junction_53201	5_Junction_53200_Junction_53201	J002	0.00770912	13.5217	0.000235816	0.00487599	2.3955	2.26061	-0.450217	chr3R	11975904	11976027	124	-	84	38	573	939	0.9032	0.8085	0.7136	0.7141	0.142
Ssdp	5_Junction_54854_Junction_54855	5_Junction_54854_Junction_54855	J001	0.0371752	4.19029	0.0406562	0.246063	1.87058	1.71306	-0.531906	chr3R	14022842	14024422	1581	-	55	70	46	74	0.2607	0.3743	0.218	0.1766	0.1202
Ssdp	5_Junction_54854_Junction_54855	5_Junction_54854_Junction_54855	J002	0.0378703	4.12894	0.0421557	0.252528	2.20153	2.33025	0.429945	chr3R	14022842	14024927	2086	-	156	117	165	345	0.7393	0.6257	0.782	0.8234	-0.1202
kra	5_Junction_55072_Junction_55073_Junction_55075	5_Junction_55072_Junction_55073_Junction_55075	J001	0.173119	1.36805	0.242147	0.729445	1.43285	1.66088	0.779888	chr3R	1425086	1425758	673	-	10	29	28	94	0.0518	0.1676	0.1451	0.2362	-0.08095
kra	5_Junction_55072_Junction_55073_Junction_55075	5_Junction_55072_Junction_55073_Junction_55075	J002	0.0187751	9.47823	0.00207925	0.0278576	1.63692	1.84672	0.709963	chr3R	1425086	1426008	923	-	36	29	70	114	0.1865	0.1676	0.3627	0.2864	-0.1475
kra	5_Junction_55072_Junction_55073_Junction_55075	5_Junction_55072_Junction_55073_Junction_55075	J003	0.0221397	14.8473	0.000116577	0.00282051	2.23397	2.03154	-0.677508	chr3R	1425086	1426735	1650	-	147	115	95	190	0.7617	0.6647	0.4922	0.4774	0.2284
unc79	5_Junction_56310_Junction_56311	5_Junction_56310_Junction_56311	J001	0.0312671	12.6929	0.000367045	0.00702074	1.44119	1.03949	-1.41937	chr3R	15066560	15067374	815	-	28	53	8	5	0.2059	0.2865	0.0833	0.0676	0.17075
unc79	5_Junction_56310_Junction_56311	5_Junction_56310_Junction_56311	J002	0.0304883	12.8426	0.000338821	0.00658849	1.90028	2.08618	0.623914	chr3R	15066560	15068245	1686	-	108	132	88	69	0.7941	0.7135	0.9167	0.9324	-0.17075
pre-mod(mdg4)-J	5_Junction_58168_Junction_58169	5_Junction_58168_Junction_58169	J001	0.0281136	22.332	2.2935e-06	0.000108219	1.86028	1.58197	-0.942769	chr3R	17184791	17185083	293	-	27	67	46	67	0.871	0.9054	0.6133	0.5154	0.32385
pre-mod(mdg4)-J	5_Junction_58168_Junction_58169	5_Junction_58168_Junction_58169	J002	0.0304369	21.5564	3.43566e-06	0.000151017	0.966168	1.49197	1.86448	chr3R	17184791	17185305	515	-	4	7	29	63	0.129	0.0946	0.3867	0.4846	-0.32385
CASK	5_Junction_58376_Junction_58377	5_Junction_58376_Junction_58377	J001	0.27717	12.4455	0.000419009	0.00784222	2.40005	1.91762	-1.61441	chr3R	17613824	17614594	771	-	220	390	112	13	0.8	0.6414	0.244	0.0605	0.56845
CASK	5_Junction_58376_Junction_58377	5_Junction_58376_Junction_58377	J002	0.277174	12.4453	0.00041905	0.00784222	2.0608	2.5409	1.60329	chr3R	17613824	17615169	1346	-	55	218	347	202	0.2	0.3586	0.756	0.9395	-0.56845
NONE	5_Junction_61188_Junction_61195	5_Junction_61188_Junction_61195	J001	0.0327973	6.74416	0.00940552	0.0864249	1.30491	1.13807	-0.589903	chr3R	20319220	20332543	13324	-	20	14	16	13	0.8696	0.8235	0.5714	0.5652	0.27825
NONE	5_Junction_61188_Junction_61195	5_Junction_61188_Junction_61195	J002	0.0734584	5.26325	0.0217803	0.158686	0.643004	1.02853	1.51124	chr3R	20319220	20347655	28436	-	3	3	12	10	0.1304	0.1765	0.4286	0.4348	-0.27825
IA-2	5_Junction_615_Junction_617	5_Junction_615_Junction_617	J001	0.0231431	31.9926	1.54762e-08	1.26296e-06	2.65294	2.36741	-0.951516	chr2L	1034190	1042962	8773	-	314	392	327	256	0.5461	0.6232	0.3045	0.2517	0.30655
IA-2	5_Junction_615_Junction_617	5_Junction_615_Junction_617	J002	0.0231614	31.97	1.5657e-08	1.27046e-06	2.49805	2.77546	0.923698	chr2L	1034190	1046808	12619	-	261	237	747	761	0.4539	0.3768	0.6955	0.7483	-0.30655
Lerp	5_Junction_63341_Junction_63342	5_Junction_63341_Junction_63342	J001	0.0106967	20.1953	6.99236e-06	0.000273513	1.97603	1.79005	-0.626043	chr3R	22669297	22669375	79	-	51	96	95	58	0.8226	0.7869	0.5621	0.5421	0.25265
Lerp	5_Junction_63341_Junction_63342	5_Junction_63341_Junction_63342	J002	0.0107087	20.188	7.01914e-06	0.000273513	1.38821	1.69595	1.05319	chr3R	22669297	22669468	172	-	11	26	74	49	0.1774	0.2131	0.4379	0.4579	-0.25265
Alh	5_Junction_67731_Junction_67732	5_Junction_67731_Junction_67732	J001	0.209075	8.10612	0.00441161	0.0493783	1.37394	1.73367	1.23043	chr3R	2921565	2922012	448	-	11	28	82	36	0.3548	0.7368	0.9213	0.9231	-0.3764
Alh	5_Junction_67731_Junction_67732	5_Junction_67731_Junction_67732	J002	0.254366	6.9604	0.00833334	0.0792424	1.25018	0.736932	-1.91357	chr3R	2921565	2922236	672	-	20	10	7	3	0.6452	0.2632	0.0787	0.0769	0.3764
pum	5_Junction_69352_Junction_69354_Junction_69356_Junction_69358	5_Junction_69352_Junction_69354_Junction_69356_Junction_69358	J001	0.131594	2.04311	0.152897	0.576496	1.44693	1.22054	-0.789092	chr3R	5060386	5062326	1941	-	23	39	13	14	0.0676	0.1733	0.0417	0.0648	0.0672
pum	5_Junction_69352_Junction_69354_Junction_69356_Junction_69358	5_Junction_69352_Junction_69354_Junction_69356_Junction_69358	J002	0.0625599	2.82405	0.0928618	0.428719	2.23942	2.41323	0.580121	chr3R	5060386	5062530	2145	-	264	144	265	173	0.7765	0.64	0.8494	0.8009	-0.1169
pum	5_Junction_69352_Junction_69354_Junction_69356_Junction_69358	5_Junction_69352_Junction_69354_Junction_69356_Junction_69358	J003	0.0180282	0.925635	0.336	0.84892	1.09913	1.31589	0.768265	chr3R	5060386	5062634	2249	-	15	12	19	15	0.0441	0.0533	0.0609	0.0694	-0.01645
pum	5_Junction_69352_Junction_69354_Junction_69356_Junction_69358	5_Junction_69352_Junction_69354_Junction_69356_Junction_69358	J004	0.0143147	9.2472	0.00235856	0.0306551	1.47869	1.24959	-0.795894	chr3R	5060386	5063335	2950	-	38	30	15	14	0.1118	0.1333	0.0481	0.0648	0.0661
CG16779	5_Junction_69676_Junction_69681_Junction_69684	5_Junction_69676_Junction_69681_Junction_69684	J001	0.0924167	3.27637	0.0702841	0.357288	1.48946	1.80593	1.07609	chr3R	5312925	5318731	5807	-	63	26	55	30	0.3333	0.1926	0.534	0.375	-0.19155
CG16779	5_Junction_69676_Junction_69681_Junction_69684	5_Junction_69676_Junction_69681_Junction_69684	J002	0.0144305	9.40248	0.00216693	0.028737	1.73131	1.60477	-0.429646	chr3R	5312925	5319116	6192	-	85	70	29	25	0.4497	0.5185	0.2816	0.3125	0.18705
CG16779	5_Junction_69676_Junction_69681_Junction_69684	5_Junction_69676_Junction_69681_Junction_69684	J003	0.0532982	0.00977325	0.92125	1	1.45267	1.51589	0.217151	chr3R	5312925	5319243	6319	-	41	39	19	25	0.2169	0.2889	0.1845	0.3125	0.0044
Jupiter	5_Junction_71660_Junction_71662	5_Junction_71660_Junction_71662	J001	0.0716511	4.77717	0.0288396	0.193482	2.49249	2.64114	0.495152	chr3R	7419488	7429862	10375	-	122	456	429	482	0.598	0.6941	0.7606	0.8623	-0.1654
Jupiter	5_Junction_71660_Junction_71662	5_Junction_71660_Junction_71662	J002	0.0718798	4.76356	0.0290684	0.194168	2.17945	2.02062	-0.531885	chr3R	7419488	7445424	25937	-	82	201	135	77	0.402	0.3059	0.2394	0.1377	0.1654
PIP4K	5_Junction_74777_Junction_74778	5_Junction_74777_Junction_74778	J001	0.0347095	6.19219	0.0128315	0.108863	1.68975	1.87731	0.633566	chr4	1217103	1217332	230	-	55	55	40	93	0.309	0.2736	0.396	0.5376	-0.1755
PIP4K	5_Junction_74777_Junction_74778	5_Junction_74777_Junction_74778	J002	0.0351207	6.13655	0.0132415	0.111486	2.07494	1.9083	-0.559306	chr4	1217103	1217382	280	-	123	146	61	80	0.691	0.7264	0.604	0.4624	0.1755
NONE	5_Junction_77280_Junction_77281_Junction_77283	5_Junction_77280_Junction_77281_Junction_77283	J001	0.0226337	38.5857	5.24008e-10	6.28558e-08	2.75248	2.7076	-0.149387	chrM	12828	12926	99	-	151	1944	136	405	0.6681	0.6517	0.3598	0.274	0.343
NONE	5_Junction_77280_Junction_77281_Junction_77283	5_Junction_77280_Junction_77281_Junction_77283	J002	0.777021	0.404443	0.524804	0.979463	1.70927	2.41845	2.37881	chrM	12828	12959	132	-	22	165	205	52	0.0973	0.0553	0.5423	0.0352	-0.21245
NONE	5_Junction_77280_Junction_77281_Junction_77283	5_Junction_77280_Junction_77281_Junction_77283	J003	0.627628	0.0663234	0.796767	1	2.40089	2.98158	1.93322	chrM	12828	13251	424	-	53	874	37	1021	0.2345	0.293	0.0979	0.6908	-0.1306
Imp	5_Junction_79040_Junction_79041	5_Junction_79040_Junction_79041	J001	0.150151	4.00974	0.0452381	0.264314	1.01907	0.652959	-1.43388	chrX	10708126	10716372	8247	-	17	10	2	3	0.1056	0.2326	0.0278	0.0556	0.1274
Imp	5_Junction_79040_Junction_79041	5_Junction_79040_Junction_79041	J002	0.101267	4.8977	0.0268925	0.183319	1.789	1.9402	0.509292	chrX	10708126	10716423	8298	-	144	33	70	51	0.8944	0.7674	0.9722	0.9444	-0.1274
mamo	5_Junction_82587_Junction_82593_Junction_82597	5_Junction_82587_Junction_82593_Junction_82597	J001	0.0272936	0.0981193	0.754098	1	1.11824	1.15587	0.134836	chrX	13880107	13880406	300	-	9	6	13	31	0.0556	0.0667	0.0818	0.0595	-0.0095
mamo	5_Junction_82587_Junction_82593_Junction_82597	5_Junction_82587_Junction_82593_Junction_82597	J002	0.0154539	4.62218	0.0315612	0.205674	2.0421	2.12098	0.264226	chrX	13880107	13882576	2470	-	91	45	110	330	0.5617	0.5	0.6918	0.6334	-0.13175
mamo	5_Junction_82587_Junction_82593_Junction_82597	5_Junction_82587_Junction_82593_Junction_82597	J003	0.0246425	4.68194	0.0304814	0.200511	1.91554	1.77173	-0.484709	chrX	13880107	13884501	4395	-	62	39	36	160	0.3827	0.4333	0.2264	0.3071	0.14125
CG8974	5_Junction_85860_Junction_85861	5_Junction_85860_Junction_85861	J001	0.0368304	18.1447	2.04733e-05	0.000658586	1.17632	1.50237	1.13648	chrX	15689134	15689907	774	-	15	15	15	44	0.4412	0.375	0.75	0.88	-0.4069
CG8974	5_Junction_85860_Junction_85861	5_Junction_85860_Junction_85861	J002	0.0451663	16.6401	4.51851e-05	0.0012744	1.33527	0.834743	-1.82267	chrX	15689134	15690033	900	-	19	25	5	6	0.5588	0.625	0.25	0.12	0.4069
Stim	5_Junction_86354_Junction_86355	5_Junction_86354_Junction_86355	J001	0.144882	5.68759	0.0170853	0.134096	1.25556	1.61595	1.24424	chrX	15831787	15832263	477	-	10	18	42	56	0.4762	0.2143	0.75	0.5957	-0.3276
Stim	5_Junction_86354_Junction_86355	5_Junction_86354_Junction_86355	J002	0.143968	5.71845	0.0167876	0.132648	1.68995	1.34218	-1.19266	chrX	15831787	15832789	1003	-	11	66	14	38	0.5238	0.7857	0.25	0.4043	0.3276
2018-09-04	5_Junction_87557_Junction_87559	5_Junction_87557_Junction_87559	J001	0.0780583	9.52018	0.00203224	0.0274346	1.72526	1.98505	0.875415	chrX	16580802	16581191	390	-	19	40	198	131	0.3065	0.3448	0.5706	0.7401	-0.3297
2018-09-04	5_Junction_87557_Junction_87559	5_Junction_87557_Junction_87559	J002	0.0778706	9.53844	0.00201213	0.0272316	2.02547	1.76963	-0.860958	chrX	16580802	16588074	7273	-	43	76	149	46	0.6935	0.6552	0.4294	0.2599	0.3297
kis	5_Junction_9056_Junction_9057	5_Junction_9056_Junction_9057	J001	0.536234	5.62224	0.017734	0.13783	1.64812	2.24372	2.00312	chr2L	228281	229171	891	-	41	80	105	144	0.3504	0.8421	0.9375	0.9863	-0.36565
kis	5_Junction_9056_Junction_9057	5_Junction_9056_Junction_9057	J002	0.540048	5.58596	0.018105	0.139731	1.5029	0.878693	-2.23214	chr2L	228281	230536	2256	-	76	15	7	2	0.6496	0.1579	0.0625	0.0137	0.36565
CG3625	5_Junction_9568_Junction_9569_Junction_9570	5_Junction_9568_Junction_9569_Junction_9570	J001	0.0970809	9.71683	0.00182588	0.0253535	2.21517	2.34638	0.438186	chr2L	284968	285431	464	-	161	225	209	158	0.1949	0.3328	0.1007	0.0586	0.1842
CG3625	5_Junction_9568_Junction_9569_Junction_9570	5_Junction_9568_Junction_9569_Junction_9570	J002	0.0556803	82.9539	8.39887e-20	3.88926e-17	1.82005	0.872745	-3.33252	chr2L	284968	286305	1338	-	72	83	2	9	0.0872	0.1228	0.001	0.0033	0.10285
CG3625	5_Junction_9568_Junction_9569_Junction_9570	5_Junction_9568_Junction_9569_Junction_9570	J003	0.097035	16.9354	3.86733e-05	0.00112913	2.59959	3.41376	2.70769	chr2L	284968	290811	5844	-	593	368	1864	2531	0.7179	0.5444	0.8983	0.9381	-0.28705
RpL36	5_Junction_98500_Junction_98501_Junction_98502_Junction_98504	5_Junction_98500_Junction_98501_Junction_98502_Junction_98504	J001	0.00697986	1.05231	0.304977	0.814316	1.68992	1.61104	-0.268031	chrX	522911	523357	447	-	41	44	35	56	0.018	0.0197	0.0147	0.0162	0.0034
RpL36	5_Junction_98500_Junction_98501_Junction_98502_Junction_98504	5_Junction_98500_Junction_98501_Junction_98502_Junction_98504	J002	0.00417167	21.1198	4.31436e-06	0.000181623	3.22655	3.14843	-0.259684	chrX	522911	523359	449	-	1477	1500	1287	1944	0.6492	0.6729	0.5398	0.5628	0.10975
RpL36	5_Junction_98500_Junction_98501_Junction_98502_Junction_98504	5_Junction_98500_Junction_98501_Junction_98502_Junction_98504	J003	0.0720393	1.62718	0.202093	0.667075	1.45364	1.20537	-0.865908	chrX	522911	523379	469	-	17	31	19	15	0.0075	0.0139	0.008	0.0043	0.00455
RpL36	5_Junction_98500_Junction_98501_Junction_98502_Junction_98504	5_Junction_98500_Junction_98501_Junction_98502_Junction_98504	J004	0.00554482	20.1181	7.28047e-06	0.00028259	2.89576	3.03524	0.463859	chrX	522911	523413	503	-	740	654	1043	1439	0.3253	0.2934	0.4375	0.4166	-0.1177
CG42492	5_Junction_98838_Junction_98839	5_Junction_98838_Junction_98839	J001	0.0298737	6.83456	0.00894107	0.0836566	1.61935	1.41509	-0.700052	chrX	5523057	5523416	360	-	32	44	34	19	0.2991	0.1991	0.1201	0.1242	0.12695
CG42492	5_Junction_98838_Junction_98839	5_Junction_98838_Junction_98839	J002	0.030338	6.77434	0.00924779	0.0856144	2.13916	2.2645	0.419029	chrX	5523057	5523428	372	-	75	177	249	134	0.7009	0.8009	0.8799	0.8758	-0.12695

## Sheet: AS A3SS events
Gene	AS_event_ID	AS_structure_ID	sub_junction_ID	sub-junction_dispersion_estimate	LRT_statistic-full_vs_reduced	LRT_p_value-full_vs_reduced	BH_adjusted_p-values	LNd	LNv	fitting_parameter_log2fold_change_LNv_LNd	sub_junction_chr	sub_junction_start_coor	sub_junction_end_coor	sub_junction_size	sub_junction_strand	raw_count.LNd_A	raw_count.LNd_B	raw_count.LNv_A	raw_count.LNv_B	percentage_usage.LNd_A	percentage_usage.LNd_B	percentage_usage.LNv_A	percentage_usage.LNv_B	deltaPSI
Sxl	3_Junction_100718_Junction_100719	3_Junction_100718_Junction_100719	J001	0.140189	6.56841	0.0103805	0.0925845	2.23799	2.49594	0.860637	chrX	6979987	6981645	1659	-	113	213	370	271	0.7533	0.7245	0.8747	0.961	-0.17895
Sxl	3_Junction_100718_Junction_100719	3_Junction_100718_Junction_100719	J002	0.138785	6.62493	0.0100561	0.0905207	1.80195	1.51947	-0.959734	chrX	6980011	6981645	1635	-	37	81	53	11	0.2467	0.2755	0.1253	0.039	0.17895
NONE	3_Junction_102223_Junction_102262	3_Junction_102223_Junction_102262	J001	0.022796	17.1111	3.52564e-05	0.00105727	2.39195	2.21708	-0.583822	chrX	8287	8344	58	-	272	155	201	181	0.9477	0.9012	0.7945	0.787	0.1337
NONE	3_Junction_102223_Junction_102262	3_Junction_102223_Junction_102262	J002	0.0223902	17.2812	3.22354e-05	0.000979957	1.29315	1.64507	1.21139	chrX	8295	8344	50	-	15	17	52	49	0.0523	0.0988	0.2055	0.213	-0.1337
ZAP3	3_Junction_104409_Junction_104410	3_Junction_104409_Junction_104410	J001	0.0535356	20.8111	5.06872e-06	0.000209854	1.38444	1.69254	1.05468	chrX	9969103	9969175	73	-	24	21	53	47	0.4615	0.5526	0.8548	0.9592	-0.39995
ZAP3	3_Junction_104409_Junction_104410	3_Junction_104409_Junction_104410	J002	0.0766187	17.3033	3.18627e-05	0.000970334	1.38158	0.80345	-2.10609	chrX	9969106	9969175	70	-	28	17	9	2	0.5385	0.4474	0.1452	0.0408	0.39995
CG3714	3_Junction_10477_Junction_10481	3_Junction_10477_Junction_10481	J001	0.0399512	10.2984	0.00133146	0.0198296	1.61171	1.7835	0.582419	chr2L	4190824	4193308	2485	-	38	49	32	80	0.7917	0.6712	0.9143	0.9302	-0.1908
CG3714	3_Junction_10477_Junction_10481	3_Junction_10477_Junction_10481	J002	0.0609793	8.39356	0.00376552	0.0437196	1.22294	0.768641	-1.68954	chr2L	4192968	4193308	341	-	10	24	3	6	0.2083	0.3288	0.0857	0.0698	0.1908
pgant5	3_Junction_11277_Junction_11278	3_Junction_11277_Junction_11278	J001	0.0284398	4.36869	0.0366052	0.228418	1.54055	1.62348	0.282894	chr2L	5092898	5093443	546	-	39	37	40	33	0.7959	0.7708	0.9524	0.8684	-0.12705
pgant5	3_Junction_11277_Junction_11278	3_Junction_11277_Junction_11278	J002	0.081304	3.07103	0.0796988	0.389725	1.01431	0.688857	-1.26476	chr2L	5092901	5093443	543	-	10	11	2	5	0.2041	0.2292	0.0476	0.1316	0.12705
Nckx30C	3_Junction_14591_Junction_14594	3_Junction_14591_Junction_14594	J001	0.0463786	9.19832	0.00242238	0.0313239	1.85303	1.63718	-0.730292	chr2L	9722942	9727026	4085	-	74	75	52	27	0.7551	0.6356	0.4727	0.3699	0.27405
Nckx30C	3_Junction_14591_Junction_14594	3_Junction_14591_Junction_14594	J002	0.0464437	9.18989	0.00243356	0.0313637	1.51728	1.75037	0.792947	chr2L	9722954	9727026	4073	-	24	43	58	46	0.2449	0.3644	0.5273	0.6301	-0.27405
CG30116	3_Junction_18858_Junction_18862	3_Junction_18858_Junction_18862	J001	0.203812	6.66176	0.00985037	0.0894394	1.92452	2.29841	1.25204	chr2R	14345103	14348069	2967	-	55	146	242	64	0.6962	0.8066	0.9798	0.9014	-0.1892
CG30116	3_Junction_18858_Junction_18862	3_Junction_18858_Junction_18862	J002	0.212262	6.43564	0.0111853	0.0977575	1.39756	0.923056	-1.70075	chr2R	14345975	14348069	2095	-	24	35	5	7	0.3038	0.1934	0.0202	0.0986	0.1892
CG30116	3_Junction_18897_Junction_18916	3_Junction_18897_Junction_18916	J001	0.0399615	21.4272	3.67517e-06	0.000158742	0.976319	1.49007	1.8202	chr2R	14384410	14385208	799	-	9	2	40	54	0.1184	0.0571	0.3846	0.4909	-0.35
CG30116	3_Junction_18897_Junction_18916	3_Junction_18897_Junction_18916	J002	0.0374703	22.0819	2.61262e-06	0.000118773	1.89	1.59774	-0.989072	chr2R	14385026	14385208	183	-	67	33	64	56	0.8816	0.9429	0.6154	0.5091	0.35
Liprin-gamma	3_Junction_21660_Junction_21665	3_Junction_21660_Junction_21665	J001	0.0564065	2.94452	0.086169	0.409917	0.704067	1.00469	1.16608	chr2R	18232798	18247757	14960	-	4	2	11	14	0.0952	0.0667	0.1897	0.1972	-0.1125
Liprin-gamma	3_Junction_21660_Junction_21665	3_Junction_21660_Junction_21665	J002	0.0204316	3.8425	0.0499689	0.283551	1.65951	1.5901	-0.236176	chr2R	18234214	18247757	13544	-	38	28	47	57	0.9048	0.9333	0.8103	0.8028	0.1125
Sin3A	3_Junction_31366_Junction_31368	3_Junction_31366_Junction_31368	J001	0.121834	10.0294	0.00154063	0.022392	1.70879	2.0845	1.26463	chr2R	8464498	8466632	2135	-	41	49	126	143	0.1475	0.3356	0.6528	0.572	-0.37085
Sin3A	3_Junction_31366_Junction_31368	3_Junction_31366_Junction_31368	J002	0.122657	9.96709	0.00159363	0.0229221	2.25966	1.89227	-1.23111	chr2R	8466056	8466632	577	-	237	97	67	107	0.8525	0.6644	0.3472	0.428	0.37085
shot	3_Junction_32492_Junction_32493	3_Junction_32492_Junction_32493	J001	0.0520801	7.41593	0.0064649	0.066082	1.31622	1.49517	0.618993	chr2R	9758843	9759482	640	-	15	31	32	19	0.5172	0.6078	0.7805	0.95	-0.30275
shot	3_Junction_32492_Junction_32493	3_Junction_32492_Junction_32493	J002	0.0848226	6.15774	0.0130838	0.110547	1.19024	0.843274	-1.27975	chr2R	9759230	9759482	253	-	14	20	9	1	0.4828	0.3922	0.2195	0.05	0.30275
CG32103	3_Junction_35153_Junction_35155	3_Junction_35153_Junction_35155	J001	0.0208103	4.34265	0.037169	0.230564	1.73028	1.63183	-0.334012	chr3L	12398260	12405109	6850	-	38	39	72	42	0.8085	0.8864	0.6923	0.7368	0.1329
CG32103	3_Junction_35153_Junction_35155	3_Junction_35153_Junction_35155	J002	0.0295542	3.85236	0.0496762	0.282644	1.02316	1.26111	0.852818	chr3L	12404838	12405109	272	-	9	5	32	15	0.1915	0.1136	0.3077	0.2632	-0.1329
pHCl	3_Junction_37355_Junction_37359	3_Junction_37355_Junction_37359	J001	0.0136339	4.39002	0.0361499	0.226642	1.65076	1.77768	0.429942	chr3L	15845797	15852910	7114	-	112	95	33	17	0.4392	0.4922	0.6111	0.6296	-0.15465
pHCl	3_Junction_37355_Junction_37359	3_Junction_37355_Junction_37359	J002	0.0136573	4.38756	0.0362022	0.226756	1.71373	1.57368	-0.476102	chr3L	15851251	15852910	1660	-	143	98	21	10	0.5608	0.5078	0.3889	0.3704	0.15465
brm	3_Junction_37470_Junction_37471	3_Junction_37470_Junction_37471	J001	0.0579062	9.796	0.00174892	0.024611	1.07808	0.446209	-2.61237	chr3L	15975663	15975901	239	-	25	15	1	1	0.3521	0.2632	0.0333	0.0769	0.25255
brm	3_Junction_37470_Junction_37471	3_Junction_37470_Junction_37471	J002	0.0339652	11.4366	0.000720108	0.0121412	1.40306	1.58346	0.619344	chr3L	15975668	15975901	234	-	46	42	29	12	0.6479	0.7368	0.9667	0.9231	-0.25255
fax	3_Junction_37953_Junction_37954	3_Junction_37953_Junction_37954	J001	0.00778168	45.1405	1.83395e-11	2.89822e-09	3.09074	2.90051	-0.632585	chr3L	16398936	16400119	1184	-	502	603	2164	1308	0.898	0.8714	0.7199	0.739	0.15525
fax	3_Junction_37953_Junction_37954	3_Junction_37953_Junction_37954	J002	0.00765124	45.6484	1.41498e-11	2.29858e-09	2.21348	2.47632	0.877153	chr3L	16398945	16400119	1175	-	57	89	842	462	0.102	0.1286	0.2801	0.261	-0.15525
CG7971	3_Junction_38169_Junction_38184	3_Junction_38169_Junction_38184	J001	0.0593573	13.9222	0.00019053	0.00413273	1.68226	2.03583	1.19151	chr3L	1659990	1661107	1118	-	27	53	137	112	0.0691	0.036	0.1491	0.2	-0.122
CG7971	3_Junction_38169_Junction_38184	3_Junction_38169_Junction_38184	J002	0.0600177	13.7841	0.00020506	0.00433917	3.03153	2.73223	-0.995581	chr3L	1660857	1661107	251	-	364	1421	782	448	0.9309	0.964	0.8509	0.8	0.122
CG14182	3_Junction_40499_Junction_40608	3_Junction_40499_Junction_40608	J001	0.0435323	4.64076	0.0312212	0.204096	0.741186	1.07954	1.28746	chr3L	19972892	20016781	43890	-	3	2	21	19	0.1579	0.1333	0.4038	0.3393	-0.22595
CG14182	3_Junction_40499_Junction_40608	3_Junction_40499_Junction_40608	J002	0.0253132	5.28609	0.0214964	0.157424	1.43399	1.29284	-0.490245	chr3L	20009236	20016781	7546	-	16	13	31	37	0.8421	0.8667	0.5962	0.6607	0.22595
ens	3_Junction_45256_Junction_45258	3_Junction_45256_Junction_45258	J001	0.0607601	3.56708	0.058936	0.319892	1.13702	1.33991	0.715753	chr3L	4129791	4131119	1329	-	12	21	17	15	0.1622	0.2658	0.3333	0.4688	-0.18705
ens	3_Junction_45256_Junction_45258	3_Junction_45256_Junction_45258	J002	0.0503041	3.92305	0.0476283	0.274494	1.67031	1.54001	-0.443933	chr3L	4130643	4131119	477	-	62	58	34	17	0.8378	0.7342	0.6667	0.5312	0.18705
dpr9	3_Junction_52141_Junction_52144	3_Junction_52141_Junction_52144	J001	0.0343499	3.84308	0.0499517	0.283551	1.94803	1.81248	-0.456317	chr3R	10887349	10888071	723	-	34	42	201	87	0.5862	0.42	0.3226	0.3655	0.15905
dpr9	3_Junction_52141_Junction_52144	3_Junction_52141_Junction_52144	J002	0.0350338	3.79503	0.0514049	0.289341	1.98553	2.11126	0.421479	chr3R	10887367	10888071	705	-	24	58	422	151	0.4138	0.58	0.6774	0.6345	-0.15905
Stat92E	3_Junction_57138_Junction_57139	3_Junction_57138_Junction_57139	J001	0.0389507	49.7385	1.75665e-12	3.20904e-10	1.12431	1.69864	1.99137	chr3R	16363678	16364941	1264	-	16	16	25	52	0.3137	0.2192	0.8621	0.9286	-0.6289
Stat92E	3_Junction_57138_Junction_57139	3_Junction_57138_Junction_57139	J002	0.038163	50.1979	1.38993e-12	2.58658e-10	1.56543	0.789213	-2.79454	chr3R	16364437	16364941	505	-	35	57	4	4	0.6863	0.7808	0.1379	0.0714	0.6289
LpR1	3_Junction_62383_Junction_62384	3_Junction_62383_Junction_62384	J001	0.0750174	7.5785	0.00590686	0.0620006	1.6117	1.85238	0.814851	chr3R	21573947	21574990	1044	-	58	45	45	66	0.5631	0.7377	0.8491	0.9041	-0.2262
LpR1	3_Junction_62383_Junction_62384	3_Junction_62383_Junction_62384	J002	0.0805603	7.21689	0.00722207	0.0716409	1.38527	1.02486	-1.27968	chr3R	21574865	21574990	126	-	45	16	8	7	0.4369	0.2623	0.1509	0.0959	0.2262
CG42724	3_Junction_62639_Junction_62646	3_Junction_62639_Junction_62646	J001	0.0650735	4.54286	0.0330564	0.212707	1.31931	1.5509	0.799029	chr3R	2188952	2190724	1773	-	14	26	27	42	0.3684	0.26	0.4426	0.6176	-0.2159
CG42724	3_Junction_62639_Junction_62646	3_Junction_62639_Junction_62646	J002	0.0633894	4.62995	0.0314184	0.205113	1.70188	1.49949	-0.689799	chr3R	2190447	2190724	278	-	24	74	34	26	0.6316	0.74	0.5574	0.3824	0.2159
Fer1HCH	3_Junction_66542_Junction_66545	3_Junction_66542_Junction_66545	J001	0.0452032	9.49901	0.00205582	0.0276405	2.41641	2.18687	-0.766381	chr3R	26213272	26213495	224	-	96	228	170	321	0.6761	0.8057	0.512	0.5237	0.22305
Fer1HCH	3_Junction_66542_Junction_66545	3_Junction_66542_Junction_66545	J002	0.045042	9.52851	0.00202305	0.0273475	1.90592	2.15376	0.831197	chr3R	26213324	26213495	172	-	46	55	162	292	0.3239	0.1943	0.488	0.4763	-0.22305
FoxP	3_Junction_69990_Junction_69991_Junction_69993	3_Junction_69990_Junction_69991_Junction_69993	J001	0.0382068	5.17445	0.0229215	0.164396	1.55422	1.5068	-0.162314	chr3R	5551897	5553710	1814	-	50	14	39	30	0.3425	0.35	0.2393	0.1493	0.15195
FoxP	3_Junction_69990_Junction_69991_Junction_69993	3_Junction_69990_Junction_69991_Junction_69993	J002	0.26754	8.47259	0.00360538	0.0422544	1.12251	2.02988	3.11381	chr3R	5551911	5553710	1800	-	10	12	93	147	0.0685	0.3	0.5706	0.7313	-0.4667
FoxP	3_Junction_69990_Junction_69991_Junction_69993	3_Junction_69990_Junction_69991_Junction_69993	J003	0.107616	9.87494	0.00167545	0.0239151	1.73622	1.41282	-1.10447	chr3R	5552735	5553710	976	-	86	14	31	24	0.589	0.35	0.1902	0.1194	0.3147
Mical	3_Junction_70368_Junction_70369	3_Junction_70368_Junction_70369	J001	0.120505	13.3828	0.000253942	0.00517024	0.762694	1.36533	2.21184	chr3R	5829372	5830376	1005	-	2	7	31	15	0.0833	0.0875	0.62	0.375	-0.4121
Mical	3_Junction_70368_Junction_70369	3_Junction_70368_Junction_70369	J002	0.0984666	15.2562	9.38687e-05	0.00236597	1.71912	1.33588	-1.31343	chr3R	5830164	5830376	213	-	22	73	19	25	0.9167	0.9125	0.38	0.625	0.4121
SelR	3_Junction_71144_Junction_71148_Junction_71150	3_Junction_71144_Junction_71148_Junction_71150	J001	0.0228259	0.0713251	0.789417	1	1.69954	1.73987	0.136568	chr3R	6689580	6692249	2670	-	35	74	54	42	0.2713	0.3719	0.3176	0.3	0.0128
SelR	3_Junction_71144_Junction_71148_Junction_71150	3_Junction_71144_Junction_71148_Junction_71150	J002	0.0572764	5.35138	0.0207059	0.153716	1.56091	1.26358	-1.02837	chr3R	6691348	6692249	902	-	21	57	16	15	0.1628	0.2864	0.0941	0.1071	0.124
SelR	3_Junction_71144_Junction_71148_Junction_71150	3_Junction_71144_Junction_71148_Junction_71150	J003	0.0860631	1.6131	0.204056	0.670265	1.8039	2.0177	0.719165	chr3R	6691369	6692249	881	-	73	68	100	83	0.5659	0.3417	0.5882	0.5929	-0.13675
hep	3_Junction_81285_Junction_81290	3_Junction_81285_Junction_81290	J001	0.0560829	9.70216	0.00184051	0.0254856	1.57055	1.27456	-1.02276	chrX	12977131	12979627	2497	-	37	32	15	23	0.5522	0.3678	0.1705	0.2018	0.27385
hep	3_Junction_81285_Junction_81290	3_Junction_81285_Junction_81290	J002	0.0547752	9.85271	0.00169582	0.0241194	1.66551	1.89285	0.76814	chrX	12978603	12979627	1025	-	30	55	73	91	0.4478	0.6322	0.8295	0.7982	-0.27385
mmd	3_Junction_86395_Junction_86396	3_Junction_86395_Junction_86396	J001	0.0119366	8.87521	0.00289069	0.035549	1.95415	2.08643	0.443652	chrX	15843010	15843551	542	-	62	122	137	94	0.5124	0.5083	0.699	0.6309	-0.1546
mmd	3_Junction_86395_Junction_86396	3_Junction_86395_Junction_86396	J002	0.0117638	8.94224	0.0027865	0.0346347	1.93746	1.77992	-0.530716	chrX	15843027	15843551	525	-	59	118	59	55	0.4876	0.4917	0.301	0.3691	0.1546
mmd	3_Junction_86405_Junction_86409	3_Junction_86405_Junction_86409	J001	0.0542561	39.7124	2.94249e-10	3.75583e-08	1.6464	2.13968	1.66109	chrX	15843909	15845181	1273	-	54	60	105	103	0.3214	0.3	0.7836	0.8957	-0.52895
mmd	3_Junction_86405_Junction_86409	3_Junction_86405_Junction_86409	J002	0.0543285	39.6726	3.00309e-10	3.80877e-08	1.99037	1.45304	-1.82188	chrX	15844418	15845181	764	-	114	140	29	12	0.6786	0.7	0.2164	0.1043	0.52895
kis	3_Junction_9057_Junction_9174	3_Junction_9057_Junction_9174	J001	0.233991	8.35486	0.00384657	0.044479	1.44035	0.932453	-1.81312	chr2L	228281	230536	2256	-	76	15	7	2	0.8352	0.5357	0.25	0.1111	0.5049
kis	3_Junction_9057_Junction_9174	3_Junction_9057_Junction_9174	J002	0.250378	7.92836	0.00486658	0.0531623	0.975678	1.501	1.86011	chr2L	229977	230536	560	-	15	13	21	16	0.1648	0.4643	0.75	0.8889	-0.5049
CG42343	3_Junction_92515_Junction_92516	3_Junction_92515_Junction_92516	J001	0.035505	19.3724	1.07551e-05	0.000390082	1.50213	1.18109	-1.1187	chrX	21312751	21313447	697	-	45	11	15	17	0.8824	0.7857	0.4688	0.3696	0.41485
CG42343	3_Junction_92515_Junction_92516	3_Junction_92515_Junction_92516	J002	0.0505933	16.609	4.59336e-05	0.0012864	0.77914	1.32664	2.01146	chrX	21312781	21313447	667	-	6	3	17	29	0.1176	0.2143	0.5312	0.6304	-0.41485
ptr	3_Junction_92992_Junction_93081	3_Junction_92992_Junction_93081	J001	0.0585815	4.82453	0.0280575	0.189191	1.34444	1.09885	-0.868781	chrX	2226308	2256803	30496	-	15	19	11	18	0.4167	0.6333	0.2895	0.2647	0.2479
ptr	3_Junction_92992_Junction_93081	3_Junction_92992_Junction_93081	J002	0.0490898	5.269	0.0217084	0.158394	1.31433	1.4986	0.63734	chrX	2239341	2256803	17463	-	21	11	27	50	0.5833	0.3667	0.7105	0.7353	-0.2479
Syt1	3_Junction_9509_Junction_9511	3_Junction_9509_Junction_9511	J001	0.353216	4.14725	0.0417022	0.250793	2.20914	2.54485	1.12003	chr2L	2787162	2792193	5032	-	132	185	299	413	0.443	0.3504	0.6065	0.9219	-0.3675
Syt1	3_Junction_9509_Junction_9511	3_Junction_9509_Junction_9511	J002	0.353629	4.14252	0.0418189	0.251191	2.41844	2.08148	-1.12584	chr2L	2787168	2792193	5026	-	166	343	194	35	0.557	0.6496	0.3935	0.0781	0.3675
pog	5_Junction_10971_Junction_10973	5_Junction_10971_Junction_10973	J001	0.0298924	8.5749	0.00340828	0.0404685	1.66333	1.85841	0.659571	chr2L	4872693	4873816	1124	+	22	42	87	114	0.2683	0.3471	0.4754	0.5729	-0.21645
pog	5_Junction_10971_Junction_10973	5_Junction_10971_Junction_10973	J002	0.0300022	8.55499	0.00344577	0.0407744	1.99377	1.8182	-0.590617	chr2L	4872693	4873870	1178	+	60	79	96	85	0.7317	0.6529	0.5246	0.4271	0.21645
Msp300	5_Junction_11357_Junction_11358	5_Junction_11357_Junction_11358	J001	0.0195781	6.61583	0.0101076	0.0908228	2.19413	2.30776	0.379618	chr2L	5204592	5204834	243	+	139	176	237	156	0.7853	0.7126	0.8464	0.8619	-0.1052
Msp300	5_Junction_11357_Junction_11358	5_Junction_11357_Junction_11358	J002	0.0190357	6.72723	0.00949518	0.0869278	1.73977	1.55319	-0.634254	chr2L	5204592	5204873	282	+	38	71	43	25	0.2147	0.2874	0.1536	0.1381	0.1052
CG13384	5_Junction_13782_Junction_13784	5_Junction_13782_Junction_13784	J001	0.295961	5.72693	0.0167067	0.132219	1.33586	0.80855	-1.92719	chr2L	8384895	8384995	101	+	33	25	2	6	0.44	0.3521	0.0211	0.1765	0.29725
CG13384	5_Junction_13782_Junction_13784	5_Junction_13782_Junction_13784	J002	0.277186	6.04759	0.0139253	0.115823	1.51431	1.94602	1.46252	chr2L	8384895	8386215	1321	+	42	46	93	28	0.56	0.6479	0.9789	0.8235	-0.29725
cg	5_Junction_15147_Junction_15148	5_Junction_15147_Junction_15148	J001	0.0574144	6.49418	0.0108228	0.095145	1.93961	2.09765	0.530102	chr2R	10066546	10066612	67	+	28	167	134	74	0.3889	0.5512	0.6768	0.7551	-0.2459
cg	5_Junction_15147_Junction_15148	5_Junction_15147_Junction_15148	J002	0.0569802	6.52839	0.0106166	0.0938711	1.90074	1.73094	-0.572885	chr2R	10066546	10066615	70	+	44	136	64	24	0.6111	0.4488	0.3232	0.2449	0.2459
Atf6	5_Junction_15425_Junction_15426	5_Junction_15425_Junction_15426	J001	0.14837	5.30206	0.0213002	0.156448	1.62224	1.81791	0.66275	chr2R	1032363	1035704	3342	+	26	53	39	97	0.65	0.8413	0.975	0.9151	-0.1994
Atf6	5_Junction_15425_Junction_15426	5_Junction_15425_Junction_15426	J002	0.210566	4.27127	0.0387621	0.237779	1.11776	0.759196	-1.35265	chr2R	1032363	1040292	7930	+	14	10	1	9	0.35	0.1587	0.025	0.0849	0.1994
Atf6	5_Junction_15437_Junction_15438	5_Junction_15437_Junction_15438	J001	0.0263164	9.64764	0.00189595	0.026072	1.92317	1.79098	-0.445354	chr2R	1035939	1035993	55	+	93	40	62	94	0.9118	0.9302	0.7209	0.7966	0.16225
Atf6	5_Junction_15437_Junction_15438	5_Junction_15437_Junction_15438	J002	0.0364544	8.52676	0.00349963	0.0413068	0.931036	1.29844	1.32589	chr2R	1035939	1035996	58	+	9	3	24	24	0.0882	0.0698	0.2791	0.2034	-0.16225
CG43729	5_Junction_16237_Junction_16239	5_Junction_16237_Junction_16239	J001	0.0818613	27.715	1.40569e-07	8.69256e-06	1.61907	0.982532	-2.23802	chr2R	11344320	11346402	2083	+	34	13	20	10	0.8718	0.65	0.1852	0.1471	0.59475
CG43729	5_Junction_16237_Junction_16239	5_Junction_16237_Junction_16239	J002	0.0726758	29.8195	4.74199e-08	3.25595e-06	1.06346	1.6326	1.98698	chr2R	11344320	11348376	4057	+	5	7	88	58	0.1282	0.35	0.8148	0.8529	-0.59475
gprs	5_Junction_17344_Junction_17345	5_Junction_17344_Junction_17345	J001	0.0436245	8.16141	0.0042791	0.0484122	1.10432	1.34866	0.863723	chr2R	12529197	12529555	359	+	11	11	19	27	0.5238	0.3667	0.7308	0.7941	-0.3172
gprs	5_Junction_17344_Junction_17345	5_Junction_17344_Junction_17345	J002	0.0562315	7.35029	0.00670519	0.067744	1.21962	0.876552	-1.25558	chr2R	12529197	12530446	1250	+	10	19	7	7	0.4762	0.6333	0.2692	0.2059	0.3172
Klp54D	5_Junction_18176_Junction_18177	5_Junction_18176_Junction_18177	J001	0.0246971	10.9928	0.000914654	0.0146876	1.70237	1.45675	-0.838319	chr2R	13450043	13450163	121	+	128	15	12	28	0.6632	0.5556	0.3077	0.3944	0.25835
Klp54D	5_Junction_18176_Junction_18177	5_Junction_18176_Junction_18177	J002	0.0248944	10.9464	0.000937833	0.0149736	1.44493	1.69438	0.851928	chr2R	13450043	13450461	419	+	65	12	27	43	0.3368	0.4444	0.6923	0.6056	-0.25835
ena	5_Junction_19390_Junction_19391	5_Junction_19390_Junction_19391	J001	0.0853094	5.0424	0.0247342	0.17287	1.61072	1.82555	0.727695	chr2R	15048920	15048976	57	+	11	46	131	43	0.1264	0.2722	0.4549	0.3675	-0.2119
ena	5_Junction_19390_Junction_19391	5_Junction_19390_Junction_19391	J002	0.0860867	5.00725	0.0252413	0.175429	2.14051	1.94329	-0.661203	chr2R	15048920	15048979	60	+	76	123	157	74	0.8736	0.7278	0.5451	0.6325	0.2119
CG8920	5_Junction_20135_Junction_20136	5_Junction_20135_Junction_20136	J001	0.0134276	8.79588	0.00301912	0.0367754	1.76169	1.60447	-0.533407	chr2R	16211916	16212001	86	+	31	84	39	38	0.7045	0.6774	0.5132	0.4578	0.20545
CG8920	5_Junction_20135_Junction_20136	5_Junction_20135_Junction_20136	J002	0.0136135	8.75422	0.00308886	0.0373893	1.432	1.62992	0.677606	chr2R	16211916	16212351	436	+	13	40	37	45	0.2955	0.3226	0.4868	0.5422	-0.20545
asrij	5_Junction_22112_Junction_22113	5_Junction_22112_Junction_22113	J001	0.0111352	4.67375	0.030627	0.201136	2.1009	2.19145	0.302988	chr2R	18774771	18774828	58	+	37	173	219	139	0.5	0.5274	0.6518	0.5991	-0.11175
asrij	5_Junction_22112_Junction_22113	5_Junction_22112_Junction_22113	J002	0.0109895	4.70739	0.0300332	0.198348	2.06139	1.95861	-0.344812	chr2R	18774771	18774831	61	+	37	155	117	93	0.5	0.4726	0.3482	0.4009	0.11175
CG3209	5_Junction_23142_Junction_23143_Junction_23144	5_Junction_23142_Junction_23143_Junction_23144	J001	0.138251	7.28301	0.00696099	0.0696869	1.71994	1.00927	-2.48166	chr2R	19957765	19958289	525	+	11	42	17	18	0.088	0.2456	0.032	0.0414	0.1301
CG3209	5_Junction_23142_Junction_23143_Junction_23144	5_Junction_23142_Junction_23143_Junction_23144	J002	0.00992897	70.3145	5.05646e-17	1.76639e-14	2.26032	2.37504	0.382907	chr2R	19957765	19959512	1748	+	80	111	493	396	0.64	0.6491	0.9284	0.9103	-0.2748
CG3209	5_Junction_23142_Junction_23143_Junction_23144	5_Junction_23142_Junction_23143_Junction_23144	J003	0.127614	7.47903	0.00624219	0.0642987	1.69389	1.08196	-2.12798	chr2R	19957765	19959516	1752	+	34	18	21	21	0.272	0.1053	0.0395	0.0483	0.14475
NaCP60E	5_Junction_23887_Junction_23890	5_Junction_23887_Junction_23890	J001	0.139565	11.4323	0.000721799	0.0121594	1.26426	0.721243	-2.02714	chr2R	20779360	20779805	446	+	40	11	3	3	0.7692	0.5	0.1364	0.15	0.4914
NaCP60E	5_Junction_23887_Junction_23890	5_Junction_23887_Junction_23890	J002	0.142026	11.305	0.000772969	0.0127835	0.955885	1.42645	1.67736	chr2R	20779360	20779923	564	+	12	11	19	17	0.2308	0.5	0.8636	0.85	-0.4914
Nplp1	5_Junction_24090_Junction_24093	5_Junction_24090_Junction_24093	J001	0.00846191	15.6972	7.43352e-05	0.00196308	2.00782	1.80891	-0.669081	chr2R	20925053	20925223	171	+	98	53	111	59	0.2469	0.25	0.15	0.1237	0.1116
Nplp1	5_Junction_24090_Junction_24093	5_Junction_24090_Junction_24093	J002	0.00858015	15.5889	7.87173e-05	0.00205968	2.48499	2.59487	0.366074	chr2R	20925053	20926572	1520	+	299	159	629	418	0.7531	0.75	0.85	0.8763	-0.1116
Eb1	5_Junction_24492_Junction_24493	5_Junction_24492_Junction_24493	J001	0.0992833	12.6234	0.00038094	0.0072517	2.45256	2.11833	-1.11621	chr2R	2640493	2640730	238	+	204	214	172	181	0.9027	0.7868	0.5165	0.5042	0.3344
Eb1	5_Junction_24492_Junction_24493	5_Junction_24492_Junction_24493	J002	0.098404	12.7242	0.000360959	0.00693767	1.74931	2.10014	1.17984	chr2R	2640493	2641683	1191	+	22	58	161	178	0.0973	0.2132	0.4835	0.4958	-0.3344
Ggamma1	5_Junction_27141_Junction_27143	5_Junction_27141_Junction_27143	J001	0.270347	4.29423	0.0382418	0.235677	2.30412	2.6594	1.18422	chr2R	4789027	4789640	614	+	261	112	427	589	0.3412	0.092	0.4636	0.6085	-0.31945
Ggamma1	5_Junction_27141_Junction_27143	5_Junction_27141_Junction_27143	J002	0.270805	4.28703	0.0384041	0.236311	2.95743	2.60309	-1.17907	chr2R	4789027	4789831	805	+	504	1105	494	379	0.6588	0.908	0.5364	0.3915	0.31945
qvr	5_Junction_30354_Junction_30355	5_Junction_30354_Junction_30355	J001	0.161102	4.83994	0.0278079	0.187826	1.45932	1.75146	0.995651	chr2R	7332265	7332871	607	+	38	23	34	71	0.1199	0.0927	0.1932	0.461	-0.2208
qvr	5_Junction_30354_Junction_30355	5_Junction_30354_Junction_30355	J002	0.162604	4.79858	0.0284833	0.191478	2.36585	2.09677	-0.899227	chr2R	7332265	7333636	1372	+	279	225	142	83	0.8801	0.9073	0.8068	0.539	0.2208
Pect	5_Junction_3422_Junction_3423	5_Junction_3422_Junction_3423	J001	0.0745923	6.79238	0.00915476	0.085001	1.66797	1.89955	0.782298	chr2L	13208777	13209434	658	+	13	65	47	137	0.0681	0.1401	0.2207	0.2998	-0.15615
Pect	5_Junction_3422_Junction_3423	5_Junction_3422_Junction_3423	J002	0.0754204	6.73233	0.00946807	0.0867594	2.52577	2.32233	-0.678408	chr2L	13208777	13209470	694	+	178	399	166	320	0.9319	0.8599	0.7793	0.7002	0.15615
CG18815	5_Junction_34611_Junction_34612	5_Junction_34611_Junction_34612	J001	0.0409754	5.6203	0.0177536	0.137928	1.1329	0.794993	-1.26425	chr3L	11622698	11623328	631	+	14	19	5	3	0.359	0.322	0.1786	0.0938	0.2043
CG18815	5_Junction_34611_Junction_34612	5_Junction_34611_Junction_34612	J002	0.023703	6.5594	0.0104331	0.092826	1.41231	1.54265	0.44795	chr3L	11622698	11623565	868	+	25	40	23	29	0.641	0.678	0.8214	0.9062	-0.2043
Mbs	5_Junction_37557_Junction_37558	5_Junction_37557_Junction_37558	J001	0.0396586	6.7742	0.00924852	0.0856144	1.44919	1.16798	-0.98342	chr3L	16055962	16056183	222	+	10	30	18	19	0.303	0.4839	0.2045	0.1881	0.19715
Mbs	5_Junction_37557_Junction_37558	5_Junction_37557_Junction_37558	J002	0.0343921	7.3407	0.00674108	0.0680671	1.57969	1.75796	0.605302	chr3L	16055962	16056186	225	+	23	32	70	82	0.697	0.5161	0.7955	0.8119	-0.19715
Mbs	5_Junction_37566_Junction_37569	5_Junction_37566_Junction_37569	J001	0.0964986	20.4304	6.18391e-06	0.000247755	0.807222	1.45124	2.3319	chr3L	16057417	16058146	730	+	2	6	33	41	0.0183	0.0625	0.2821	0.4141	-0.3077
Mbs	5_Junction_37566_Junction_37569	5_Junction_37566_Junction_37569	J002	0.0882481	21.6627	3.25054e-06	0.000143633	2.12335	1.73484	-1.30652	chr3L	16057417	16059121	1705	+	107	90	84	58	0.9817	0.9375	0.7179	0.5859	0.3077
CG9368	5_Junction_40085_Junction_40086	5_Junction_40085_Junction_40086	J001	0.123802	7.4141	0.00647147	0.066082	1.66965	1.9346	0.894466	chr3L	19595160	19595754	595	+	21	72	88	74	0.4038	0.6857	0.8627	0.8506	-0.3119
CG9368	5_Junction_40085_Junction_40086	5_Junction_40085_Junction_40086	J002	0.12712	7.26404	0.0070349	0.0702355	1.50029	1.17869	-1.12094	chr3L	19595160	19595769	610	+	31	33	14	13	0.5962	0.3143	0.1373	0.1494	0.3119
sif	5_Junction_46220_Junction_46221	5_Junction_46220_Junction_46221	J001	0.177895	14.088	0.000174455	0.00382572	1.40203	1.91896	1.75803	chr3L	5668308	5669105	798	+	22	22	84	98	0.2973	0.1746	0.6667	0.875	-0.5349
sif	5_Junction_46220_Junction_46221	5_Junction_46220_Junction_46221	J002	0.17787	14.0898	0.000174291	0.00382572	1.94742	1.4337	-1.74431	chr3L	5668308	5669375	1068	+	52	104	42	14	0.7027	0.8254	0.3333	0.125	0.5349
tow	5_Junction_47623_Junction_47624	5_Junction_47623_Junction_47624	J001	0.0256056	6.15139	0.0131309	0.110836	1.76946	1.92213	0.514547	chr3L	6941015	6941069	55	+	24	81	119	57	0.2526	0.2263	0.3371	0.4419	-0.15005
tow	5_Junction_47623_Junction_47624	5_Junction_47623_Junction_47624	J002	0.026162	6.06443	0.0137931	0.114918	2.2895	2.16612	-0.412322	chr3L	6941015	6941084	70	+	71	277	234	72	0.7474	0.7737	0.6629	0.5581	0.15005
Ca-alpha1D	5_Junction_4910_Junction_4911	5_Junction_4910_Junction_4911	J001	0.156437	14.8651	0.000115481	0.00280422	1.78623	1.23734	-1.8856	chr2L	16185626	16186109	484	+	40	76	19	14	0.597	0.7755	0.25	0.1029	0.5098
Ca-alpha1D	5_Junction_4910_Junction_4911	5_Junction_4910_Junction_4911	J002	0.156317	14.875	0.000114873	0.00279627	1.41232	1.93658	1.7817	chr2L	16185626	16187453	1828	+	27	22	57	122	0.403	0.2245	0.75	0.8971	-0.5098
CG44838	5_Junction_50329_Junction_50330	5_Junction_50329_Junction_50330	J001	0.105061	6.75362	0.00935579	0.0861667	1.92439	2.13944	0.72114	chr3L	9463733	9464233	501	+	22	91	205	184	0.55	0.7165	0.83	0.9154	-0.23945
CG44838	5_Junction_50329_Junction_50330	5_Junction_50329_Junction_50330	J002	0.105283	6.74306	0.0094113	0.0864381	1.60218	1.34551	-0.882759	chr3L	9463733	9466226	2494	+	18	36	42	17	0.45	0.2835	0.17	0.0846	0.23945
CG8177	5_Junction_50668_Junction_50669	5_Junction_50668_Junction_50669	J001	0.0900493	35.7625	2.22897e-09	2.26445e-07	1.34486	0.712324	-2.34555	chr3L	9774318	9774801	484	+	27	23	6	1	0.931	0.92	0.2308	0.0556	0.7823
CG8177	5_Junction_50668_Junction_50669	5_Junction_50668_Junction_50669	J002	0.145009	28.3397	1.01789e-07	6.47548e-06	0.430389	1.35865	3.68834	chr3L	9774318	9775707	1390	+	2	2	20	17	0.069	0.08	0.7692	0.9444	-0.7823
Glut1	5_Junction_50737_Junction_50740	5_Junction_50737_Junction_50740	J001	0.0229051	28.3746	9.99689e-08	6.40058e-06	1.38745	0.761361	-2.29391	chr3L	984276	984645	370	+	22	52	5	1	0.6471	0.6265	0.1316	0.0909	0.52555
Glut1	5_Junction_50737_Junction_50740	5_Junction_50737_Junction_50740	J002	0.02308	28.317	1.02985e-07	6.5307e-06	1.16318	1.5515	1.35152	chr3L	984276	985939	1664	+	12	31	33	10	0.3529	0.3735	0.8684	0.9091	-0.52555
CG8108	5_Junction_50756_Junction_50757	5_Junction_50756_Junction_50757	J001	0.0318439	11.3483	0.000755155	0.0125724	2.1336	1.97096	-0.545145	chr3L	9857902	9858156	255	+	98	68	110	200	0.9159	0.9577	0.7534	0.8163	0.15195
CG8108	5_Junction_50756_Junction_50757	5_Junction_50756_Junction_50757	J002	0.0344479	10.9766	0.000922676	0.0147687	1.03215	1.40602	1.32481	chr3L	9857902	9858178	277	+	9	3	36	45	0.0841	0.0423	0.2466	0.1837	-0.15195
Tm1	5_Junction_52518_Junction_52521	5_Junction_52518_Junction_52521	J001	0.130844	12.0595	0.000515281	0.00926018	1.85601	1.39968	-1.55433	chr3R	11128944	11129361	418	+	78	141	13	18	0.212	0.4196	0.0451	0.0753	0.2556
Tm1	5_Junction_52518_Junction_52521	5_Junction_52518_Junction_52521	J002	0.131971	11.968	0.000541232	0.00964818	2.18605	2.59489	1.3639	chr3R	11128944	11133751	4808	+	290	195	275	221	0.788	0.5804	0.9549	0.9247	-0.2556
Sap47	5_Junction_52968_Junction_52970	5_Junction_52968_Junction_52970	J001	0.0295557	4.51297	0.0336388	0.215445	2.23166	2.35006	0.395341	chr3R	11761306	11761673	368	+	129	155	384	130	0.6515	0.7561	0.8223	0.8075	-0.1111
Sap47	5_Junction_52968_Junction_52970	5_Junction_52968_Junction_52970	J002	0.0289455	4.58326	0.0322858	0.209269	1.85258	1.6974	-0.52436	chr3R	11761306	11761702	397	+	69	50	83	31	0.3485	0.2439	0.1777	0.1925	0.1111
cpo	5_Junction_54477_Junction_54479	5_Junction_54477_Junction_54479	J001	0.025838	16.7991	4.15529e-05	0.00119913	1.22685	0.461459	-3.06604	chr3R	13793550	13803076	9527	+	19	41	1	1	0.1557	0.1872	0.0128	0.0323	0.1489
cpo	5_Junction_54477_Junction_54479	5_Junction_54477_Junction_54479	J002	0.0206804	17.7275	2.54915e-05	0.000803144	1.87812	2.01862	0.47207	chr3R	13793550	13832655	39106	+	103	178	77	30	0.8443	0.8128	0.9872	0.9677	-0.1489
dgrn	5_Junction_57296_Junction_57297	5_Junction_57296_Junction_57297	J001	0.0395322	3.35822	0.0668702	0.345908	1.18794	0.964916	-0.809658	chr3R	1650697	1650753	57	+	18	12	8	8	0.3333	0.4286	0.2353	0.1778	0.1744
dgrn	5_Junction_57296_Junction_57297	5_Junction_57296_Junction_57297	J002	0.0253694	3.86493	0.0493053	0.281228	1.41279	1.52153	0.374027	chr3R	1650697	1650756	60	+	36	16	26	37	0.6667	0.5714	0.7647	0.8222	-0.1744
klg	5_Junction_59631_Junction_59632	5_Junction_59631_Junction_59632	J001	0.0305649	4.89863	0.026878	0.183319	1.34149	1.11442	-0.80239	chr3R	18741358	18762214	20857	+	41	27	8	7	0.3228	0.4286	0.2051	0.1795	0.1834
klg	5_Junction_59631_Junction_59632	5_Junction_59631_Junction_59632	J002	0.0279958	5.0495	0.024633	0.172345	1.58272	1.71151	0.437728	chr3R	18741358	18774397	33040	+	86	36	31	32	0.6772	0.5714	0.7949	0.8205	-0.1834
CG31140	5_Junction_60571_Junction_60572	5_Junction_60571_Junction_60572	J001	0.0598688	16.5997	4.61579e-05	0.00129086	2.3283	2.65316	1.08273	chr3R	19805344	19806248	905	+	152	238	359	626	0.6179	0.5421	0.8178	0.8968	-0.2773
CG31140	5_Junction_60571_Junction_60572	5_Junction_60571_Junction_60572	J002	0.0599453	16.5804	4.66297e-05	0.00130041	2.21086	1.8564	-1.18882	chr3R	19805344	19807446	2103	+	94	201	80	72	0.3821	0.4579	0.1822	0.1032	0.2773
wry	5_Junction_6245_Junction_6246	5_Junction_6245_Junction_6246	J001	0.00709868	18.772	1.47315e-05	0.000502282	2.0172	1.83571	-0.610162	chr2L	1854308	1855362	1055	+	65	93	82	95	0.6311	0.6414	0.4293	0.4148	0.2142
wry	5_Junction_6245_Junction_6246	5_Junction_6245_Junction_6246	J002	0.00708091	18.7888	1.46024e-05	0.000500452	1.77507	1.97118	0.660382	chr2L	1854308	1855371	1064	+	38	52	109	134	0.3689	0.3586	0.5707	0.5852	-0.2142
CG34362	5_Junction_64232_Junction_64238	5_Junction_64232_Junction_64238	J001	0.0440397	24.0785	9.24865e-07	4.79581e-05	1.29119	1.75301	1.58415	chr3R	23876903	23877411	509	+	13	21	54	68	0.0279	0.02	0.153	0.0963	-0.1007
CG34362	5_Junction_64232_Junction_64238	5_Junction_64232_Junction_64238	J002	0.044477	23.9043	1.01247e-06	5.16448e-05	2.91602	2.62356	-0.973202	chr3R	23876903	23947298	70396	+	453	1028	299	638	0.9721	0.98	0.847	0.9037	0.1007
CG11876	5_Junction_65505_Junction_65506	5_Junction_65505_Junction_65506	J001	0.0258407	6.94301	0.00841473	0.0797117	2.13959	2.27355	0.447774	chr3R	24939877	24940149	273	+	93	200	187	155	0.2627	0.2899	0.3755	0.4799	-0.1514
CG11876	5_Junction_65505_Junction_65506	5_Junction_65505_Junction_65506	J002	0.0256622	6.98211	0.00823283	0.0785492	2.54628	2.42513	-0.403774	chr3R	24939877	24940814	938	+	261	490	311	168	0.7373	0.7101	0.6245	0.5201	0.1514
CG8043	5_Junction_68749_Junction_68750	5_Junction_68749_Junction_68750	J001	0.210386	5.7417	0.0165667	0.131477	1.5554	1.14691	-1.42295	chr3R	4502769	4502833	65	+	40	10	16	22	0.8889	0.5882	0.4324	0.2857	0.3795
CG8043	5_Junction_68749_Junction_68750	5_Junction_68749_Junction_68750	J002	0.214042	5.65903	0.0173658	0.135496	0.986136	1.42369	1.55529	chr3R	4502769	4503993	1225	+	5	7	21	55	0.1111	0.4118	0.5676	0.7143	-0.3795
Rbp1	5_Junction_71038_Junction_71039	5_Junction_71038_Junction_71039	J001	0.0347659	8.99947	0.00270058	0.0339054	2.33816	2.50217	0.54694	chr3R	6610645	6611123	479	+	82	236	447	394	0.4659	0.5043	0.6404	0.7392	-0.2047
Rbp1	5_Junction_71038_Junction_71039	5_Junction_71038_Junction_71039	J002	0.0349305	8.96368	0.002754	0.0343164	2.34761	2.17601	-0.573203	chr3R	6610645	6611878	1234	+	94	232	251	139	0.5341	0.4957	0.3596	0.2608	0.2047
Cdep	5_Junction_71862_Junction_71863	5_Junction_71862_Junction_71863	J001	0.0292264	22.1596	2.50897e-06	0.000115645	1.48612	1.25022	-0.819228	chr3R	752053	752507	455	+	17	62	10	15	0.9444	0.9254	0.4762	0.5556	0.419
Cdep	5_Junction_71862_Junction_71863	5_Junction_71862_Junction_71863	J002	0.0829699	15.4092	8.65645e-05	0.00221837	0.508411	1.21762	2.80146	chr3R	752053	766395	14343	+	1	5	11	12	0.0556	0.0746	0.5238	0.4444	-0.419
B52	5_Junction_73431_Junction_73433	5_Junction_73431_Junction_73433	J001	0.114418	4.31677	0.0377385	0.233152	2.1593	1.91989	-0.802741	chr3R	9488773	9489175	403	+	127	115	101	94	0.588	0.4137	0.1931	0.3418	0.2334
B52	5_Junction_73431_Junction_73433	5_Junction_73431_Junction_73433	J002	0.114825	4.30232	0.0380605	0.234777	2.18512	2.41818	0.778132	chr3R	9488773	9491173	2401	+	89	163	422	181	0.412	0.5863	0.8069	0.6582	-0.2334
NONE	5_Junction_74944_Junction_74946	5_Junction_74944_Junction_74946	J001	0.164574	11.0252	0.000898803	0.0144915	2.53254	2.09046	-1.47608	chr4	1284582	1284640	59	+	471	189	139	118	0.8937	0.6974	0.3861	0.3481	0.42845
NONE	5_Junction_74944_Junction_74946	5_Junction_74944_Junction_74946	J002	0.164602	11.0234	0.000899689	0.014494	1.87308	2.32198	1.50379	chr4	1284582	1288727	4146	+	56	82	221	221	0.1063	0.3026	0.6139	0.6519	-0.42845
rudhira	5_Junction_79949_Junction_79950	5_Junction_79949_Junction_79950	J001	0.0232286	6.53036	0.0106048	0.0938503	1.5695	1.36938	-0.688348	chrX	11721050	11723546	2497	+	67	39	16	15	0.5982	0.5493	0.3019	0.4412	0.2022
rudhira	5_Junction_79949_Junction_79950	5_Junction_79949_Junction_79950	J002	0.0233372	6.51679	0.0106861	0.0942905	1.43662	1.62195	0.634557	chrX	11721050	11728744	7695	+	45	32	37	19	0.4018	0.4507	0.6981	0.5588	-0.2022
Tomosyn	5_Junction_80778_Junction_80780	5_Junction_80778_Junction_80780	J001	0.0781075	7.0018	0.00814276	0.0781918	1.24933	0.848116	-1.4699	chrX	12534872	12537904	3033	+	14	26	7	3	0.1346	0.2476	0.0588	0.0448	0.1393
Tomosyn	5_Junction_80778_Junction_80780	5_Junction_80778_Junction_80780	J002	0.0639273	7.85143	0.00507806	0.0549235	1.85026	2.03627	0.625085	chrX	12534872	12542568	7697	+	90	79	112	64	0.8654	0.7524	0.9412	0.9552	-0.1393
Nhe2	5_Junction_8092_Junction_8093	5_Junction_8092_Junction_8093	J001	0.0955262	10.677	0.00108474	0.0168219	1.31741	0.822029	-1.81001	chr2L	21129082	21130003	922	+	17	27	7	3	0.2615	0.3418	0.1077	0.0312	0.2322
Nhe2	5_Junction_8092_Junction_8093	5_Junction_8092_Junction_8093	J002	0.0782524	12.0857	0.00050809	0.00913919	1.65913	1.92578	0.900553	chr2L	21129082	21132032	2951	+	48	52	58	93	0.7385	0.6582	0.8923	0.9688	-0.2322
fne	5_Junction_81150_Junction_81151	5_Junction_81150_Junction_81151	J001	0.00763139	74.8847	4.99015e-18	2.07008e-15	1.17408	1.85334	2.3361	chrX	12837789	12838324	536	+	10	12	113	65	0.0216	0.019	0.1323	0.1349	-0.1133
fne	5_Junction_81150_Junction_81151	5_Junction_81150_Junction_81151	J002	0.00784927	74.1583	7.20986e-18	2.87126e-15	2.83704	2.66634	-0.568062	chrX	12837789	12839197	1409	+	453	620	741	417	0.9784	0.981	0.8677	0.8651	0.1133
CG7378	5_Junction_89938_Junction_89939	5_Junction_89938_Junction_89939	J001	0.181929	13.7912	0.000204289	0.00432746	0.795034	1.45344	2.38754	chrX	18794993	18800106	5114	+	5	2	50	32	0.04	0.0093	0.3333	0.173	-0.2285
CG7378	5_Junction_89938_Junction_89939	5_Junction_89938_Junction_89939	J002	0.17567	14.1741	0.000166652	0.00368708	2.41057	1.91973	-1.64238	chrX	18794993	18801530	6538	+	120	213	100	153	0.96	0.9907	0.6667	0.827	0.2285
CG14200	5_Junction_90972_Junction_90974	5_Junction_90972_Junction_90974	J001	0.160475	7.88973	0.00497164	0.0540367	1.37903	0.923613	-1.63445	chrX	19390820	19399798	8979	+	45	25	3	7	0.625	0.463	0.0698	0.2593	0.37945
CG14200	5_Junction_90972_Junction_90974	5_Junction_90972_Junction_90974	J002	0.154573	8.11007	0.00440201	0.0493502	1.2934	1.6714	1.29998	chrX	19390820	19400514	9695	+	27	29	40	20	0.375	0.537	0.9302	0.7407	-0.37945
l(1)G0196	5_Junction_92860_Junction_92862	5_Junction_92860_Junction_92862	J001	0.174165	4.99282	0.0254526	0.176405	1.56049	1.83647	0.935847	chrX	21900455	21904029	3575	+	14	30	81	137	0.3784	0.5172	0.6585	0.8726	-0.31775
l(1)G0196	5_Junction_92860_Junction_92862	5_Junction_92860_Junction_92862	J002	0.17594	4.9508	0.0260786	0.179681	1.61768	1.32271	-1.01496	chrX	21900455	21904470	4016	+	23	28	42	20	0.6216	0.4828	0.3415	0.1274	0.31775
NONE	5_Junction_93008_Junction_93012	5_Junction_93008_Junction_93012	J001	0.0689674	4.09314	0.0430575	0.255581	0.950696	1.22353	0.988846	chrX	22336226	22339435	3210	+	8	4	11	32	0.2857	0.1905	0.3929	0.5614	-0.23905
NONE	5_Junction_93008_Junction_93012	5_Junction_93008_Junction_93012	J002	0.0539367	4.62823	0.0314501	0.205188	1.40729	1.21966	-0.655434	chrX	22336226	22340514	4289	+	20	17	17	25	0.7143	0.8095	0.6071	0.4386	0.23905
CG13759	5_Junction_93322_Junction_93323	5_Junction_93322_Junction_93323	J001	0.0978368	7.308	0.00686481	0.0690128	1.39227	1.58521	0.662647	chrX	2476608	2477020	413	+	33	12	38	43	0.7674	0.5455	0.95	0.8958	-0.26645
CG13759	5_Junction_93322_Junction_93323	5_Junction_93322_Junction_93323	J002	0.175201	5.35682	0.0206413	0.153477	1.06923	0.623625	-1.74364	chrX	2476608	2477040	433	+	10	10	2	5	0.2326	0.4545	0.05	0.1042	0.26645
dnc	5_Junction_95697_Junction_95698	5_Junction_95697_Junction_95698	J001	0.142656	9.71743	0.00182529	0.0253535	1.42695	1.84907	1.4367	chrX	3150760	3152781	2022	+	27	16	125	38	0.4737	0.2712	0.8621	0.7037	-0.41045
dnc	5_Junction_95697_Junction_95698	5_Junction_95697_Junction_95698	J002	0.144269	9.62586	0.00191857	0.0263135	1.65905	1.20151	-1.5816	chrX	3150760	3165225	14466	+	30	43	20	16	0.5263	0.7288	0.1379	0.2963	0.41045
Mnt	5_Junction_96280_Junction_96281_Junction_96283	5_Junction_96280_Junction_96281_Junction_96283	J001	0.0312554	4.48074	0.0342789	0.21821	1.37448	1.53485	0.552232	chrX	3587965	3592149	4185	+	15	16	58	39	0.2727	0.2078	0.3473	0.4535	-0.16015
Mnt	5_Junction_96280_Junction_96281_Junction_96283	5_Junction_96280_Junction_96281_Junction_96283	J002	0.0670811	0.939245	0.332472	0.84495	1.44725	1.25753	-0.659808	chrX	3587965	3592371	4407	+	20	17	28	22	0.3636	0.2208	0.1677	0.2558	0.08045
Mnt	5_Junction_96280_Junction_96281_Junction_96283	5_Junction_96280_Junction_96281_Junction_96283	J003	0.126854	0.35676	0.550311	0.992104	1.68791	1.58366	-0.354536	chrX	3587965	3592776	4812	+	20	44	81	25	0.3636	0.5714	0.485	0.2907	0.07965
Mnt	5_Junction_96297_Junction_96298	5_Junction_96297_Junction_96298	J001	0.106354	12.4841	0.000410428	0.00771714	1.3303	0.794454	-1.96343	chrX	3593820	3593961	142	+	23	16	7	4	0.561	0.3265	0.0787	0.0976	0.3556
Mnt	5_Junction_96297_Junction_96298	5_Junction_96297_Junction_96298	J002	0.0868762	14.191	0.000165162	0.0036646	1.45025	1.76822	1.08355	chrX	3593820	3593964	145	+	18	33	82	37	0.439	0.6735	0.9213	0.9024	-0.3556
l(1)G0334	5_Junction_97715_Junction_97716	5_Junction_97715_Junction_97716	J001	0.0229087	21.6201	3.32342e-06	0.000146407	1.32833	1.72477	1.35888	chrX	4596624	4596723	100	+	17	17	74	50	0.073	0.0379	0.1775	0.1695	-0.11805
l(1)G0334	5_Junction_97715_Junction_97716	5_Junction_97715_Junction_97716	J002	0.0233056	21.3981	3.73142e-06	0.000160475	2.59729	2.39594	-0.671022	chrX	4596624	4596855	232	+	216	432	343	245	0.927	0.9621	0.8225	0.8305	0.11805
SK	5_Junction_98648_Junction_98649_Junction_98651	5_Junction_98648_Junction_98649_Junction_98651	J001	0.0138175	4.25132	0.0392198	0.239701	1.92117	1.93957	0.0618489	chrX	5292795	5293563	769	+	70	47	111	135	0.7292	0.6528	0.7986	0.8036	-0.1101
SK	5_Junction_98648_Junction_98649_Junction_98651	5_Junction_98648_Junction_98649_Junction_98651	J002	0.0345645	3.35377	0.0670511	0.346515	1.06587	1.28919	0.795353	chrX	5292795	5293566	772	+	6	9	21	32	0.0625	0.125	0.1511	0.1905	-0.07705
SK	5_Junction_98648_Junction_98649_Junction_98651	5_Junction_98648_Junction_98649_Junction_98651	J003	0.199688	10.0264	0.00154313	0.0223995	1.42138	0.588902	-3.13962	chrX	5292795	5293725	931	+	20	16	7	1	0.2083	0.2222	0.0504	0.006	0.18705

## Sheet: AS intron retention events
Gene	AS_event_ID	AS_structure_ID	sub_junction_ID	sub-junction_dispersion_estimate	LRT_statistic-full_vs_reduced	LRT_p_value-full_vs_reduced	BH_adjusted_p-values	LNd	LNv	fitting_parameter_log2fold_change_LNv_LNd	sub_junction_chr	sub_junction_start_coor	sub_junction_end_coor	sub_junction_size	sub_junction_strand	raw_count.LNd_A	raw_count.LNd_B	raw_count.LNv_A	raw_count.LNv_B	percentage_usage.LNd_A	percentage_usage.LNd_B	percentage_usage.LNv_A	percentage_usage.LNv_B	deltaPSI
tim	intronretention_Junction_10089	intronretentionleft-Junction_10089	J001	0.0619654	14.7715	0.000121358	0.00290793	3.29477	3.02307	-0.903192	chr2L	3494621	3495478	858	-	1749	580	2081	1560	0.8329	0.9077	0.5953	0.6593
tim	intronretention_Junction_10089	intronretentionleft-Junction_10089	J002	0.0616029	14.8532	0.00011621	0.00281504	2.53687	2.81278	0.918506	chr2L	3494573	3494669	97	-	351	59	1415	806	0.1671	0.0923	0.4047	0.3407
tim	intronretention_Junction_10089	intronretentionright-Junction_10089	J001	0.019437	10.3405	0.00130141	0.019437	3.23354	3.0845	-0.495444	chr2L	3494621	3495478	858	-	1749	580	2081	1560	0.9109	0.8722	0.8069	0.8138
tim	intronretention_Junction_10089	intronretentionright-Junction_10089	J002	0.0192625	10.425	0.00124319	0.0187321	2.28274	2.45648	0.579613	chr2L	3495431	3495530	100	-	171	85	498	357	0.0891	0.1278	0.1931	0.1862	-0.238661
Gs1l	intronretention_Junction_10662	intronretentionleft-Junction_10662	J001	0.0277427	9.38619	0.00218627	0.0289448	2.23125	2.40177	0.569215	chr2L	4456520	4456722	203	-	0	174	313	650	INF	0.719	0.8943	0.8621
Gs1l	intronretention_Junction_10662	intronretentionleft-Junction_10662	J002	0.0269302	9.58301	0.00196386	0.0267558	1.82104	1.57714	-0.826968	chr2L	4456472	4456568	97	-	0	68	37	104	INF	0.281	0.1057	0.1379
Gs1l	intronretention_Junction_10662	intronretentionright-Junction_10662	J001	0.0201713	21.2101	4.11596e-06	0.000174748	2.22769	2.40369	0.587539	chr2L	4456520	4456722	203	-	0	174	313	650	INF	0.8131	0.9572	0.9517
Gs1l	intronretention_Junction_10662	intronretentionright-Junction_10662	J002	0.0221839	20.1893	7.01457e-06	0.000273513	1.58888	1.12856	-1.60297	chr2L	4456675	4456771	97	-	0	40	14	33	INF	0.1869	0.0428	0.0483	0.225884
pog	intronretention_Junction_10979	intronretentionleft-Junction_10979	J001	0.0324507	18.8121	1.44253e-05	0.00049609	1.92156	1.65568	-0.898068	chr2L	4874562	4874885	324	+	68	95	48	41	0.8395	0.7983	0.5647	0.4362
pog	intronretention_Junction_10979	intronretentionleft-Junction_10979	J002	0.0330592	18.6161	1.59867e-05	0.000535905	1.29424	1.65555	1.24321	chr2L	4874519	4874610	92	+	13	24	37	53	0.1605	0.2017	0.4353	0.5638
pog	intronretention_Junction_10979	intronretentionright-Junction_10979	J001	0.00765137	32.0881	1.47334e-08	1.21228e-06	1.93253	1.64118	-0.984237	chr2L	4874562	4874885	324	+	68	95	48	41	0.5037	0.475	0.2264	0.237
pog	intronretention_Junction_10979	intronretentionright-Junction_10979	J002	0.00782804	31.8108	1.69949e-08	1.35905e-06	1.9563	2.15802	0.676088	chr2L	4874838	4874934	97	+	67	105	164	132	0.4963	0.525	0.7736	0.763	-0.25469
CG9154	intronretention_Junction_11918	intronretentionleft-Junction_11918	J001	0.0176088	6.74489	0.00940168	0.0864249	1.45503	1.60949	0.528704	chr2L	6070392	6070447	56	-	13	31	53	46	0.4333	0.5167	0.6709	0.7188
CG9154	intronretention_Junction_11918	intronretentionleft-Junction_11918	J002	0.0190978	6.58247	0.0102988	0.0920005	1.47283	1.27069	-0.701588	chr2L	6070344	6070440	97	-	17	29	26	18	0.5667	0.4833	0.3291	0.2812
CG9154	intronretention_Junction_11918	intronretentionright-Junction_11918	J001	0.178204	4.58716	0.0322124	0.209001	1.39637	1.67727	0.961589	chr2L	6070392	6070447	56	-	13	31	53	46	0.1912	0.4429	0.7361	0.5542
CG9154	intronretention_Junction_11918	intronretentionright-Junction_11918	J002	0.177884	4.59408	0.0320825	0.208305	1.7045	1.42614	-0.951054	chr2L	6070400	6070494	95	-	55	39	19	37	0.8088	0.5571	0.2639	0.4458	0.265095
Nhe3	intronretention_Junction_12293	intronretentionleft-Junction_12293	J001	0.0192773	16.6298	4.54311e-05	0.00127655	2.16577	2.30576	0.467772	chr2L	6680706	6680945	240	-	0	114	473	529	INF	0.8382	0.9614	0.9583
Nhe3	intronretention_Junction_12293	intronretentionleft-Junction_12293	J002	0.0261598	14.6893	0.000126765	0.00301209	1.45544	0.973936	-1.71003	chr2L	6680669	6680754	86	-	0	22	19	23	INF	0.1618	0.0386	0.0417
Nhe3	intronretention_Junction_12293	intronretentionright-Junction_12293	J001	0.018503	21.6712	3.23612e-06	0.000143633	2.15273	2.31854	0.554042	chr2L	6680706	6680945	240	-	0	114	473	529	INF	0.8085	0.9556	0.9583
Nhe3	intronretention_Junction_12293	intronretentionright-Junction_12293	J002	0.0227651	19.8339	8.44706e-06	0.000319768	1.52951	1.01314	-1.81932	chr2L	6680898	6680994	97	-	0	27	22	23	INF	0.1915	0.0444	0.0417	0.22073
CG12375	intronretention_Junction_13407	intronretentionleft-Junction_13407	J001	0.0651703	7.49541	0.00618563	0.0639652	1.81352	2.01536	0.678838	chr2L	8126698	8126755	58	-	0	56	246	204	INF	0.7467	0.9462	0.9067
CG12375	intronretention_Junction_13407	intronretentionleft-Junction_13407	J002	0.0890393	6.11436	0.0134088	0.112408	1.352	0.946488	-1.45465	chr2L	8126650	8126746	97	-	0	19	14	21	INF	0.2533	0.0538	0.0933
CG12375	intronretention_Junction_13407	intronretentionright-Junction_13407	J001	0.0494138	5.46931	0.0193533	0.146693	1.84872	1.97813	0.43522	chr2L	8126698	8126755	58	-	0	56	246	204	INF	0.8116	0.9498	0.9189
CG12375	intronretention_Junction_13407	intronretentionright-Junction_13407	J002	0.0882371	3.99122	0.0457379	0.266608	1.22886	0.868218	-1.32023	chr2L	8126708	8126803	96	-	0	13	13	18	INF	0.1884	0.0502	0.0811	0.233939
aPKC	intronretention_Junction_15762	intronretentionleft-Junction_15762	J001	0.0562248	15.333	9.01262e-05	0.0022861	2.48745	2.17373	-1.04715	chr2R	10833595	10833653	59	-	493	140	112	190	0.9062	0.8187	0.6188	0.6032
aPKC	intronretention_Junction_15762	intronretentionleft-Junction_15762	J002	0.0554707	15.514	8.18946e-05	0.00212329	1.61826	1.98261	1.23044	chr2R	10833547	10833643	97	-	51	31	69	125	0.0938	0.1813	0.3812	0.3968
aPKC	intronretention_Junction_15762	intronretentionright-Junction_15762	J001	0.00846434	42.5431	6.91409e-11	9.83382e-09	2.43485	2.23116	-0.679809	chr2R	10833595	10833653	59	-	493	140	112	190	0.837	0.8333	0.5714	0.6149
aPKC	intronretention_Junction_15762	intronretentionright-Junction_15762	J002	0.00825776	43.0683	5.28629e-11	7.85527e-09	1.73853	2.0618	1.08787	chr2R	10833606	10833702	97	-	96	28	84	119	0.163	0.1667	0.4286	0.3851	-0.3067
Flo1	intronretention_Junction_16340	intronretentionleft-Junction_16340	J001	0.0207118	7.95308	0.00480057	0.0527492	2.91168	3.03996	0.426587	chr2R	11454096	11454306	211	-	632	520	1474	1661	0.7077	0.6213	0.7857	0.7835
Flo1	intronretention_Junction_16340	intronretentionleft-Junction_16340	J002	0.0205521	8.00943	0.00465343	0.0513916	2.61712	2.47954	-0.458319	chr2R	11454048	11454144	97	-	261	317	402	459	0.2923	0.3787	0.2143	0.2165
Flo1	intronretention_Junction_16340	intronretentionright-Junction_16340	J001	0.0170055	37.9842	7.1319e-10	8.25642e-08	2.8557	3.09598	0.799029	chr2R	11454096	11454306	211	-	632	520	1474	1661	0.756	0.7202	0.9201	0.8954
Flo1	intronretention_Junction_16340	intronretentionright-Junction_16340	J002	0.0169987	37.9969	7.08556e-10	8.25074e-08	2.4059	2.10704	-0.998425	chr2R	11454259	11454355	97	-	204	202	128	194	0.244	0.2798	0.0799	0.1046	0.188368
Mlf	intronretention_Junction_16521	intronretentionleft-Junction_16521	J001	0.148092	4.861	0.0274703	0.186114	2.13528	1.86731	-0.899292	chr2R	11824831	11825182	352	-	156	79	80	92	0.9231	0.767	0.6612	0.5823
Mlf	intronretention_Junction_16521	intronretentionleft-Junction_16521	J002	0.147837	4.86829	0.0273545	0.185589	1.36214	1.66003	1.02175	chr2R	11824783	11824879	97	-	13	24	41	66	0.0769	0.233	0.3388	0.4177
Mlf	intronretention_Junction_16521	intronretentionright-Junction_16521	J001	0.152914	4.74232	0.0294293	0.195528	2.13876	1.86385	-0.922587	chr2R	11824831	11825182	352	-	156	79	80	92	0.907	0.7383	0.5229	0.6389
Mlf	intronretention_Junction_16521	intronretentionright-Junction_16521	J002	0.1522	4.7621	0.029093	0.194201	1.43761	1.73434	1.01251	chr2R	11825135	11825228	94	-	16	28	73	52	0.093	0.2617	0.4771	0.3611	-0.297915
CG8401	intronretention_Junction_16635	intronretentionleft-Junction_16635	J001	0.0316989	33.6632	6.55288e-09	6.00867e-07	3.42017	3.10868	-1.03533	chr2R	11916510	11916564	55	+	7898	16020	174	395	0.9787	0.971	0.8529	0.8977
CG8401	intronretention_Junction_16635	intronretentionleft-Junction_16635	J002	0.0301578	34.9274	3.42222e-09	3.30792e-07	1.86304	2.23797	1.25703	chr2R	11916462	11916558	97	+	172	479	30	45	0.0213	0.029	0.1471	0.1023
CG8401	intronretention_Junction_16635	intronretentionright-Junction_16635	J001	0.27891	7.7255	0.00544462	0.0580681	3.49747	3.03051	-1.5521	chr2R	11916510	11916564	55	+	7898	16020	174	395	0.9895	0.9979	0.9405	0.9658
CG8401	intronretention_Junction_16635	intronretentionright-Junction_16635	J002	0.270487	7.94523	0.00482144	0.052895	1.19553	1.69101	1.71127	chr2R	11916517	11916613	97	+	84	33	11	14	0.0105	0.0021	0.0595	0.0342	-0.129144
NONE	intronretention_Junction_16697	intronretentionleft-Junction_16697	J001	0.039995	16.6289	4.54537e-05	0.00127655	0.532846	1.24095	2.76756	chr2R	11958977	11959046	70	+	2	1	41	11	0.0455	0.0667	0.3981	0.3333
NONE	intronretention_Junction_16697	intronretentionleft-Junction_16697	J002	0.0249471	19.2527	1.1451e-05	0.000409356	1.65812	1.43803	-0.752676	chr2R	11958929	11959025	97	+	42	14	62	22	0.9545	0.9333	0.6019	0.6667
NONE	intronretention_Junction_16697	intronretentionright-Junction_16697	J001	0.0631326	19.4978	1.00716e-05	0.000369056	0.477658	1.31869	3.30695	chr2R	11958977	11959046	70	+	2	1	41	11	0.0225	0.0833	0.3981	0.2895
NONE	intronretention_Junction_16697	intronretentionright-Junction_16697	J002	0.0400525	24.2541	8.44275e-07	4.38935e-05	1.81077	1.53999	-0.919243	chr2R	11958999	11959093	95	+	87	11	62	27	0.9775	0.9167	0.6019	0.7105	0.189045
Hsf	intronretention_Junction_18575	intronretentionleft-Junction_18575	J001	0.0471196	4.9121	0.0266692	0.182738	2.19	2.01314	-0.592268	chr2R	14018892	14018963	72	-	58	146	145	158	0.6517	0.7807	0.587	0.5113
Hsf	intronretention_Junction_18575	intronretentionleft-Junction_18575	J002	0.0465393	4.96341	0.0258891	0.17869	1.73558	1.93143	0.660386	chr2R	14018844	14018940	97	-	31	41	102	151	0.3483	0.2193	0.413	0.4887
Hsf	intronretention_Junction_18575	intronretentionright-Junction_18575	J001	0.115789	5.82	0.0158449	0.127373	2.24819	1.95644	-0.977038	chr2R	14018892	14018963	72	-	58	146	145	158	0.8406	0.9125	0.7592	0.5725
Hsf	intronretention_Junction_18575	intronretentionright-Junction_18575	J002	0.114779	5.86431	0.0154509	0.125064	1.34508	1.68223	1.15636	chr2R	14018916	14019012	97	-	11	14	46	118	0.1594	0.0875	0.2408	0.4275	-0.220732
CG5174	intronretention_Junction_18807	intronretentionleft-Junction_18807	J001	0.0650539	9.88822	0.00166341	0.0237602	1.87135	1.58529	-0.968751	chr2R	14312171	14312375	205	+	0	124	41	44	INF	0.8857	0.6508	0.5116
CG5174	intronretention_Junction_18807	intronretentionleft-Junction_18807	J002	0.0758186	8.80272	0.00300782	0.0367208	1.00951	1.45947	1.59229	chr2R	14312123	14312219	97	+	0	16	22	42	INF	0.1143	0.3492	0.4884
CG5174	intronretention_Junction_18807	intronretentionright-Junction_18807	J001	0.0162629	28.2664	1.05718e-07	6.68271e-06	1.88562	1.56296	-1.09298	chr2R	14312171	14312375	205	+	0	124	41	44	INF	0.7702	0.3905	0.3761
CG5174	intronretention_Junction_18807	intronretentionright-Junction_18807	J002	0.0163121	28.2224	1.08144e-07	6.81445e-06	1.36628	1.76536	1.3642	chr2R	14312328	14312424	97	+	0	37	64	73	INF	0.2298	0.6095	0.6239	-0.400783
CG30118	intronretention_Junction_18833	intronretentionleft-Junction_18833	J001	0.0114668	4.90434	0.0267893	0.183004	1.77583	1.66742	-0.367143	chr2R	14325482	14325711	230	-	39	117	33	35	0.7091	0.7048	0.5593	0.5645
CG30118	intronretention_Junction_18833	intronretentionleft-Junction_18833	J002	0.0117506	4.86823	0.0273556	0.185589	1.40296	1.56184	0.545855	chr2R	14325440	14325530	91	-	16	49	26	27	0.2909	0.2952	0.4407	0.4355
CG30118	intronretention_Junction_18833	intronretentionright-Junction_18833	J001	0.0271092	8.33013	0.0038993	0.0449322	1.80749	1.6392	-0.569911	chr2R	14325482	14325711	230	-	39	117	33	35	0.7959	0.6724	0.4925	0.493
CG30118	intronretention_Junction_18833	intronretentionright-Junction_18833	J002	0.0273686	8.2957	0.0039739	0.0456334	1.44896	1.65153	0.692611	chr2R	14325664	14325759	96	-	10	57	34	36	0.2041	0.3276	0.5075	0.507	-0.206341
CG15087	intronretention_Junction_19079	intronretentionleft-Junction_19079	J001	0.0238332	8.73791	0.00311661	0.0376337	1.77888	1.95616	0.59706	chr2R	14595693	14595765	73	-	0	85	89	157	INF	0.5484	0.7946	0.7476
CG15087	intronretention_Junction_19079	intronretentionleft-Junction_19079	J002	0.0238783	8.72798	0.00313364	0.0377406	1.69481	1.45661	-0.813157	chr2R	14595645	14595741	97	-	0	70	23	53	INF	0.4516	0.2054	0.2524
CG15087	intronretention_Junction_19079	intronretentionright-Junction_19079	J001	0.0601191	3.91341	0.0479023	0.275542	1.77831	1.9616	0.617271	chr2R	14595693	14595765	73	-	0	85	89	157	INF	0.5743	0.7236	0.8177
CG15087	intronretention_Junction_19079	intronretentionright-Junction_19079	J002	0.0604659	3.89547	0.0484165	0.27767	1.6491	1.42844	-0.755113	chr2R	14595718	14595814	97	-	0	63	34	35	INF	0.4257	0.2764	0.1823	0.235294
qkr58E-3	intronretention_Junction_21730	intronretentionleft-Junction_21730	J001	0.0113908	16.8802	3.98144e-05	0.00115566	1.90781	2.07736	0.569049	chr2R	18297901	18298042	142	-	55	92	130	127	0.5978	0.538	0.7831	0.7605
qkr58E-3	intronretention_Junction_21730	intronretentionleft-Junction_21730	J002	0.0112215	16.9921	3.75365e-05	0.0011073	1.80702	1.55538	-0.853979	chr2R	18297853	18297949	97	-	37	79	36	40	0.4022	0.462	0.2169	0.2395
qkr58E-3	intronretention_Junction_21730	intronretentionright-Junction_21730	J001	0.012527	5.07533	0.0242687	0.170454	1.94626	2.03906	0.311464	chr2R	18297901	18298042	142	-	55	92	130	127	0.534	0.6133	0.6915	0.7056
qkr58E-3	intronretention_Junction_21730	intronretentionright-Junction_21730	J002	0.0123384	5.10892	0.0238031	0.1684	1.80384	1.67949	-0.420754	chr2R	18297995	18298091	97	-	48	58	58	53	0.466	0.3867	0.3085	0.2944	0.181513
CG3409	intronretention_Junction_24414	intronretentionleft-Junction_24414	J001	0.0995456	8.22444	0.00413299	0.0470801	1.78233	2.09968	1.0667	chr2R	2588322	2588385	64	-	46	0	340	336	0.6301	INF	0.9341	0.875
CG3409	intronretention_Junction_24414	intronretentionleft-Junction_24414	J002	0.102916	8.01467	0.00464	0.0513002	1.55881	1.14648	-1.43615	chr2R	2588275	2588370	96	-	27	0	24	48	0.3699	INF	0.0659	0.125
CG3409	intronretention_Junction_24414	intronretentionright-Junction_24414	J001	0.0242929	41.4995	1.17901e-10	1.665e-08	1.81464	2.07538	0.876246	chr2R	2588322	2588385	64	-	46	0	340	336	0.6479	INF	0.9659	0.9655
CG3409	intronretention_Junction_24414	intronretentionright-Junction_24414	J002	0.0423837	31.9652	1.56958e-08	1.27046e-06	1.55566	0.713753	-3.06597	chr2R	2588338	2588434	97	-	25	0	12	12	0.3521	INF	0.0341	0.0345	0.406982
Syx6	intronretention_Junction_29821	intronretentionleft-Junction_29821	J001	0.00933403	21.2233	4.08759e-06	0.000173915	2.4292	2.55311	0.412941	chr2R	7107863	7107967	105	+	206	247	444	395	0.7893	0.7866	0.8934	0.9165
Syx6	intronretention_Junction_29821	intronretentionleft-Junction_29821	J002	0.00912207	21.4424	3.64618e-06	0.000158545	1.86264	1.58792	-0.930424	chr2R	7107815	7107911	97	+	55	67	53	36	0.2107	0.2134	0.1066	0.0835
Syx6	intronretention_Junction_29821	intronretentionright-Junction_29821	J001	0.058246	4.32142	0.0376355	0.23266	2.42284	2.56118	0.461057	chr2R	7107863	7107967	105	+	206	247	444	395	0.9279	0.879	0.9447	0.9681
Syx6	intronretention_Junction_29821	intronretentionright-Junction_29821	J002	0.0600117	4.2296	0.0397247	0.242043	1.48159	1.25522	-0.786057	chr2R	7107920	7108017	98	+	16	34	26	13	0.0721	0.121	0.0553	0.0319	0.142568
stj	intronretention_Junction_32353	intronretentionleft-Junction_32353	J001	0.0852627	15.5909	7.86318e-05	0.00205968	1.87065	2.19051	1.07278	chr2R	9697868	9697982	115	+	29	100	150	194	0.5179	0.7092	0.8982	0.9372
stj	intronretention_Junction_32353	intronretentionleft-Junction_32353	J002	0.0863158	15.4498	8.4726e-05	0.00217967	1.58972	1.16454	-1.47715	chr2R	9697820	9697916	97	+	27	41	17	13	0.4821	0.2908	0.1018	0.0628
stj	intronretention_Junction_32353	intronretentionright-Junction_32353	J001	0.217209	6.02575	0.0140987	0.117021	1.87529	2.1871	1.04577	chr2R	9697868	9697982	115	+	29	100	150	194	0.4833	0.8197	0.9202	0.9327
stj	intronretention_Junction_32353	intronretentionright-Junction_32353	J002	0.223268	5.88089	0.015306	0.124144	1.48044	1.11627	-1.27604	chr2R	9697935	9698030	96	+	31	22	13	14	0.5167	0.1803	0.0798	0.0673	0.382166
CG6357	intronretention_Junction_32438	intronretentionleft-Junction_32438	J001	0.0250306	133.611	6.6451e-31	8.26983e-28	2.17264	1.40106	-2.61187	chr2R	9727810	9727878	69	+	0	425	20	12	INF	0.9594	0.1961	0.1935
CG6357	intronretention_Junction_32438	intronretentionleft-Junction_32438	J002	0.0242887	136.151	1.84879e-31	2.4542e-28	0.845388	2.00654	4.0652	chr2R	9727763	9727858	96	+	0	18	82	50	INF	0.0406	0.8039	0.8065
CG6357	intronretention_Junction_32438	intronretentionright-Junction_32438	J001	0.0399405	110.292	8.45492e-26	5.80532e-23	2.24488	1.33384	-3.08668	chr2R	9727810	9727878	69	+	0	425	20	12	INF	0.9572	0.1754	0.1224
CG6357	intronretention_Junction_32438	intronretentionright-Junction_32438	J002	0.0383338	113.748	1.47973e-26	1.28106e-23	0.930064	2.06597	3.94124	chr2R	9727831	9727927	97	+	0	19	94	86	INF	0.0428	0.8246	0.8776	-0.828352
shot	intronretention_Junction_32472	intronretentionleft-Junction_32472	J001	0.0365679	5.60095	0.0179507	0.138969	2.02022	1.84589	-0.585989	chr2R	9753000	9753260	261	-	0	139	118	78	INF	0.7722	0.6146	0.5235
shot	intronretention_Junction_32472	intronretentionleft-Junction_32472	J002	0.0363256	5.62835	0.0176722	0.137457	1.49213	1.71242	0.750736	chr2R	9752952	9753048	97	-	0	41	74	71	INF	0.2278	0.3854	0.4765
shot	intronretention_Junction_32472	intronretentionright-Junction_32472	J001	0.0340106	8.92209	0.00281742	0.0349103	2.03249	1.83318	-0.669983	chr2R	9753000	9753260	261	-	0	139	118	78	INF	0.8634	0.686	0.6047
shot	intronretention_Junction_32472	intronretentionright-Junction_32472	J002	0.034659	8.81331	0.00299041	0.0365307	1.24199	1.56292	1.11116	chr2R	9753213	9753309	97	-	0	22	54	51	INF	0.1366	0.314	0.3953	-0.253281
CG40191	intronretention_Junction_33295	intronretentionleft-Junction_33295	J001	0.0159118	3.94946	0.0468864	0.271002	1.93788	2.02357	0.287675	chr2RHet	391926	391974	49	+	70	0	205	328	0.7692	INF	0.8761	0.8654
CG40191	intronretention_Junction_33295	intronretentionleft-Junction_33295	J002	0.0171562	3.84674	0.0498428	0.28336	1.43141	1.22401	-0.723304	chr2RHet	391878	391974	97	+	21	0	29	51	0.2308	INF	0.1239	0.1346
CG40191	intronretention_Junction_33295	intronretentionright-Junction_33295	J001	0.0355567	10.8458	0.000990198	0.0155864	1.88043	2.07584	0.6561	chr2RHet	391926	391974	49	+	70	0	205	328	0.7216	INF	0.8952	0.9266
CG40191	intronretention_Junction_33295	intronretentionright-Junction_33295	J002	0.0420623	9.81285	0.00173297	0.024421	1.48036	1.08676	-1.38227	chr2RHet	391927	392023	97	+	27	0	24	26	0.2784	INF	0.1048	0.0734	0.209005
GlcAT-P	intronretention_Junction_34355	intronretentionleft-Junction_34355	J001	0.0111465	15.8041	7.02503e-05	0.00188014	1.37245	1.65148	0.95689	chr3L	11189975	11190337	363	-	33	29	42	22	0.1953	0.1933	0.3889	0.44
GlcAT-P	intronretention_Junction_34355	intronretentionleft-Junction_34355	J002	0.0110828	15.8329	6.91896e-05	0.00185674	1.97586	1.81734	-0.533412	chr3L	11189931	11190023	93	-	136	121	66	28	0.8047	0.8067	0.6111	0.56
GlcAT-P	intronretention_Junction_34355	intronretentionright-Junction_34355	J001	0.0321621	6.06753	0.0137689	0.11481	1.4047	1.62164	0.743712	chr3L	11189975	11190337	363	-	33	29	42	22	0.1341	0.1871	0.3387	0.2472
GlcAT-P	intronretention_Junction_34355	intronretentionright-Junction_34355	J002	0.032392	6.03914	0.0139921	0.11633	2.12401	1.98033	-0.481575	chr3L	11190290	11190386	97	-	213	126	82	67	0.8659	0.8129	0.6613	0.7528	0.108813
Sap130	intronretention_Junction_35463	intronretentionleft-Junction_35463	J001	0.0153629	10.6688	0.00108958	0.0168749	2.29444	2.39645	0.340406	chr3L	12805550	12805607	58	+	171	273	208	228	0.8814	0.8478	0.9369	0.9461
Sap130	intronretention_Junction_35463	intronretentionleft-Junction_35463	J002	0.0155677	10.6104	0.00112451	0.0173442	1.51379	1.21392	-1.04222	chr3L	12805502	12805598	97	+	23	49	14	13	0.1186	0.1522	0.0631	0.0539
Sap130	intronretention_Junction_35463	intronretentionright-Junction_35463	J001	0.029813	16.6843	4.41455e-05	0.00125141	2.25498	2.43678	0.606703	chr3L	12805550	12805607	58	+	171	273	208	228	0.8028	0.8639	0.9498	0.958
Sap130	intronretention_Junction_35463	intronretentionright-Junction_35463	J002	0.0298085	16.6856	4.41141e-05	0.00125141	1.54169	1.14994	-1.36526	chr3L	12805560	12805656	97	+	42	43	11	10	0.1972	0.1361	0.0502	0.042	0.164274
Tdrd3	intronretention_Junction_36688	intronretentionleft-Junction_36688	J001	0.0236398	7.7987	0.00522839	0.0561007	1.94353	2.06706	0.414477	chr3L	14782313	14782417	105	+	156	0	142	126	0.78	INF	0.9045	0.913
Tdrd3	intronretention_Junction_36688	intronretentionleft-Junction_36688	J002	0.0301057	6.86177	0.00880591	0.0827481	1.41234	1.10083	-1.09702	chr3L	14782265	14782361	97	+	44	0	15	12	0.22	INF	0.0955	0.087
Tdrd3	intronretention_Junction_36688	intronretentionright-Junction_36688	J001	0.0275861	8.67605	0.00322419	0.0386049	1.93347	2.07639	0.479517	chr3L	14782313	14782417	105	+	156	0	142	126	0.7685	INF	0.9221	0.9
Tdrd3	intronretention_Junction_36688	intronretentionright-Junction_36688	J002	0.0347264	7.60698	0.00581429	0.0612562	1.42974	1.09266	-1.18662	chr3L	14782370	14782466	97	+	47	0	12	14	0.2315	INF	0.0779	0.1	0.203013
CG5830	intronretention_Junction_37492	intronretentionleft-Junction_37492	J001	0.139646	9.61901	0.00192574	0.0263904	2.16707	1.66881	-1.6766	chr3L	15997174	15997447	274	-	0	105	96	149	INF	0.8203	0.4286	0.2467
CG5830	intronretention_Junction_37492	intronretentionleft-Junction_37492	J002	0.141162	9.52338	0.0020287	0.0274053	1.51143	2.02854	1.74939	chr3L	15997126	15997222	97	-	0	23	128	455	INF	0.1797	0.5714	0.7533
CG5830	intronretention_Junction_37492	intronretentionright-Junction_37492	J001	0.0419159	18.7796	1.46728e-05	0.00050114	2.09944	1.73114	-1.23899	chr3L	15997174	15997447	274	-	0	105	96	149	INF	0.8824	0.5581	0.4599
CG5830	intronretention_Junction_37492	intronretentionright-Junction_37492	J002	0.0416428	18.8639	1.40385e-05	0.00048506	1.23436	1.73658	1.72831	chr3L	15997400	15997496	97	-	0	14	76	175	INF	0.1176	0.4419	0.5401	-0.483801
nSyb	intronretention_Junction_37838	intronretentionleft-Junction_37838	J001	0.0472824	15.3852	8.76709e-05	0.0022295	2.47455	2.7871	1.04077	chr3L	1632454	1633056	603	-	0	225	1428	1668	INF	0.6484	0.916	0.8784
nSyb	intronretention_Junction_37838	intronretentionleft-Junction_37838	J002	0.0470199	15.4615	8.42036e-05	0.00216903	2.20736	1.85455	-1.18335	chr3L	1632406	1632502	97	-	0	122	131	231	INF	0.3516	0.084	0.1216
nSyb	intronretention_Junction_37838	intronretentionright-Junction_37838	J001	0.1675	6.15494	0.0131045	0.110661	2.45633	2.8081	1.17138	chr3L	1632454	1633056	603	-	0	225	1428	1668	INF	0.7601	0.9681	0.9231
nSyb	intronretention_Junction_37838	intronretentionright-Junction_37838	J002	0.164998	6.23792	0.0125043	0.106495	1.95639	1.58456	-1.2572	chr3L	1633009	1633105	97	-	0	71	47	139	INF	0.2399	0.0319	0.0769	0.31553
Uhg7	intronretention_Junction_38231	intronretentionleft-Junction_38231	J001	0.0347789	4.46936	0.0345079	0.219099	1.15613	1.40799	0.883547	chr3L	1666367	1666552	186	-	0	14	37	57	INF	0.1818	0.4157	0.3333
Uhg7	intronretention_Junction_38231	intronretentionleft-Junction_38231	J002	0.0323651	4.63882	0.0312566	0.20426	1.79358	1.64329	-0.509042	chr3L	1666323	1666415	93	-	0	63	52	114	INF	0.8182	0.5843	0.6667
Uhg7	intronretention_Junction_38231	intronretentionright-Junction_38231	J001	0.0220287	11.4795	0.000703694	0.0119352	1.12251	1.44169	1.12026	chr3L	1666367	1666552	186	-	0	14	37	57	INF	0.2917	0.6379	0.6477
Uhg7	intronretention_Junction_38231	intronretentionright-Junction_38231	J002	0.0233333	11.2335	0.000803352	0.0132092	1.49223	1.19786	-1.02517	chr3L	1666505	1666596	92	-	0	34	21	31	INF	0.7083	0.3621	0.3523	0.183145
drpr	intronretention_Junction_38591	intronretentionleft-Junction_38591	J001	0.0536558	19.72	8.96566e-06	0.000333752	0.746344	1.53779	2.87181	chr3L	1716556	1716673	118	-	0	2	148	160	INF	0.0556	0.5139	0.6226
drpr	intronretention_Junction_38591	intronretentionleft-Junction_38591	J002	0.0536134	19.7275	8.93064e-06	0.000333634	1.90824	1.43369	-1.61266	chr3L	1716509	1716604	96	-	0	34	140	97	INF	0.9444	0.4861	0.3774
drpr	intronretention_Junction_38591	intronretentionright-Junction_38591	J001	0.011295	38.9745	4.29386e-10	5.27774e-08	0.654808	1.64792	3.62729	chr3L	1716556	1716673	118	-	0	2	148	160	INF	0.0351	0.4852	0.4624
drpr	intronretention_Junction_38591	intronretentionright-Junction_38591	J002	0.0114722	38.8346	4.61273e-10	5.56659e-08	1.99618	1.69273	-1.02299	chr3L	1716626	1716722	97	-	0	55	157	186	INF	0.9649	0.5148	0.5376	0.324901
park	intronretention_Junction_41550	intronretentionleft-Junction_41550	J001	0.015254	19.9976	7.75382e-06	0.000297208	2.08089	1.82516	-0.85924	chr3L	21188730	21188870	141	-	0	101	152	153	INF	0.771	0.4856	0.4435
park	intronretention_Junction_41550	intronretentionleft-Junction_41550	J002	0.015142	20.0756	7.44384e-06	0.000288369	1.55534	1.88582	1.11969	chr3L	21188682	21188778	97	-	0	30	161	192	INF	0.229	0.5144	0.5565
park	intronretention_Junction_41550	intronretentionright-Junction_41550	J001	0.0240262	7.43161	0.00640881	0.065678	2.03254	1.87652	-0.524134	chr3L	21188730	21188870	141	-	0	101	152	153	INF	0.886	0.7451	0.6923
park	intronretention_Junction_41550	intronretentionright-Junction_41550	J002	0.0243227	7.38596	0.00657349	0.0668153	1.15798	1.47733	1.1159	chr3L	21188823	21188919	97	-	0	13	52	68	INF	0.114	0.2549	0.3077	-0.30794
srpk79D	intronretention_Junction_42505	intronretentionleft-Junction_42505	J001	0.0408713	24.2834	8.3151e-07	4.3343e-05	1.52833	1.89507	1.24317	chr3L	22273036	22273257	222	+	32	0	152	176	0.4444	INF	0.9048	0.8585
srpk79D	intronretention_Junction_42505	intronretentionleft-Junction_42505	J002	0.0469627	22.2408	2.40514e-06	0.000112254	1.6205	1.06247	-1.94942	chr3L	22272988	22273084	97	+	40	0	16	29	0.5556	INF	0.0952	0.1415
srpk79D	intronretention_Junction_42505	intronretentionright-Junction_42505	J001	0.0287121	44.446	2.61465e-11	3.97427e-09	1.50113	1.92472	1.4361	chr3L	22273036	22273257	222	+	32	0	152	176	0.3902	INF	0.9212	0.8934
srpk79D	intronretention_Junction_42505	intronretentionright-Junction_42505	J002	0.0340053	40.3404	2.13348e-10	2.83212e-08	1.68646	0.981066	-2.47243	chr3L	22273210	22273307	98	+	50	0	13	21	0.6098	INF	0.0788	0.1066	0.546975
CG32230	intronretention_Junction_43190	intronretentionleft-Junction_43190	J001	0.0328662	5.86986	0.0154023	0.124721	1.91379	2.0224	0.364723	chr3L	23332469	23332528	60	+	0	126	101	161	INF	0.8129	0.9099	0.936
CG32230	intronretention_Junction_43190	intronretentionleft-Junction_43190	J002	0.0541776	4.42089	0.0355015	0.223492	1.28711	0.97521	-1.12107	chr3L	23332422	23332517	96	+	0	29	10	11	INF	0.1871	0.0901	0.064
CG32230	intronretention_Junction_43190	intronretentionright-Junction_43190	J001	0.0295013	7.02523	0.0080369	0.077507	1.88449	2.05124	0.559991	chr3L	23332469	23332528	60	+	0	126	101	161	INF	0.6238	0.7829	0.8342
CG32230	intronretention_Junction_43190	intronretentionright-Junction_43190	J002	0.0293162	7.05574	0.00790118	0.0766271	1.66537	1.42789	-0.812259	chr3L	23332481	23332575	95	+	0	76	28	32	INF	0.3762	0.2171	0.1658	0.212463
CG17698	intronretention_Junction_43377	intronretentionleft-Junction_43377	J001	0.035037	6.679	0.00975554	0.0887807	2.48314	2.6297	0.488193	chr3L	23741160	23741238	79	+	332	294	395	436	0.7109	0.6519	0.7853	0.8482
CG17698	intronretention_Junction_43377	intronretentionleft-Junction_43377	J002	0.0351626	6.65857	0.009868	0.0895586	2.15656	1.9882	-0.56408	chr3L	23741112	23741208	97	+	135	157	108	78	0.2891	0.3481	0.2147	0.1518
CG17698	intronretention_Junction_43377	intronretentionright-Junction_43377	J001	0.0276574	8.90324	0.00284665	0.0351193	2.47822	2.63462	0.521003	chr3L	23741160	23741238	79	+	332	294	395	436	0.7345	0.6391	0.8264	0.8289
CG17698	intronretention_Junction_43377	intronretentionright-Junction_43377	J002	0.0277304	8.88371	0.00287726	0.035431	2.14434	1.9569	-0.628306	chr3L	23741191	23741287	97	+	120	166	83	90	0.2655	0.3609	0.1736	0.1711	0.176914
CG1309	intronretention_Junction_45410	intronretentionleft-Junction_45410	J001	0.0259348	53.6965	2.33985e-13	5.11989e-11	2.26822	2.65505	1.28963	chr3L	4260971	4261036	66	+	219	0	733	870	0.6865	INF	0.967	0.956
CG1309	intronretention_Junction_45410	intronretentionleft-Junction_45410	J002	0.0253379	54.6268	1.45731e-13	3.3354e-11	1.93515	1.28332	-2.22565	chr3L	4260923	4261019	97	+	100	0	25	40	0.3135	INF	0.033	0.044
CG1309	intronretention_Junction_45410	intronretentionright-Junction_45410	J001	0.0243813	73.2974	1.11516e-17	4.2702e-15	2.28451	2.63902	1.18184	chr3L	4260971	4261036	66	+	219	0	733	870	0.7604	INF	0.9865	0.9853
CG1309	intronretention_Junction_45410	intronretentionright-Junction_45410	J002	0.0264911	69.5775	7.34689e-17	2.52226e-14	1.79408	0.859344	-3.2964	chr3L	4260989	4261085	97	+	69	0	10	13	0.2396	INF	0.0135	0.0147	0.38407
CG11455	intronretention_Junction_4636	intronretentionleft-Junction_4636	J001	0.0486004	20.3249	6.53454e-06	0.000259712	1.90078	1.48147	-1.4231	chr2L	155429	155565	137	+	0	164	13	42	INF	0.7257	0.2063	0.3022
CG11455	intronretention_Junction_4636	intronretentionleft-Junction_4636	J002	0.0486498	20.3092	6.58815e-06	0.000261321	1.48211	1.90153	1.42342	chr2L	155381	155477	97	+	0	62	50	97	INF	0.2743	0.7937	0.6978
CG11455	intronretention_Junction_4636	intronretentionright-Junction_4636	J001	0.230487	10.0931	0.00148823	0.0217415	1.98433	1.39947	-1.98652	chr2L	155429	155565	137	+	0	164	13	42	INF	0.341	0.0171	0.0543
CG11455	intronretention_Junction_4636	intronretentionright-Junction_4636	J002	0.232758	10.0041	0.00156195	0.0225701	2.26896	2.82781	1.86208	chr2L	155518	155612	95	+	0	317	748	731	INF	0.659	0.9829	0.9457	-0.269873
CG3967	intronretention_Junction_50245	intronretentionleft-Junction_50245	J001	0.0733734	9.8316	0.00171539	0.0242725	1.24453	1.50288	0.89677	chr3L	9408396	9408506	111	-	10	16	0	83	0.4	0.5714	INF	0.8737
CG3967	intronretention_Junction_50245	intronretentionleft-Junction_50245	J002	0.135753	6.4093	0.0113524	0.0986938	1.25564	0.744823	-1.90076	chr3L	9408349	9408444	96	-	15	12	0	12	0.6	0.4286	INF	0.1263
CG3967	intronretention_Junction_50245	intronretentionright-Junction_50245	J001	0.147508	6.56283	0.0104131	0.092772	1.21098	1.5353	1.1263	chr3L	9408396	9408506	111	-	10	16	0	83	0.3333	0.5714	INF	0.8646
CG3967	intronretention_Junction_50245	intronretentionright-Junction_50245	J002	0.203492	5.01029	0.0251971	0.175183	1.28769	0.801341	-1.78735	chr3L	9408459	9408555	97	-	20	12	0	13	0.6667	0.4286	INF	0.1354	0.457407
CG6912	intronretention_Junction_52232	intronretentionleft-Junction_52232	J001	0.02731	25.4887	4.44985e-07	2.43421e-05	1.60198	0.873625	-2.5902	chr3R	10962114	10962192	79	-	271	240	0	2	0.7994	0.8421	INF	0.1333
CG6912	intronretention_Junction_52232	intronretentionleft-Junction_52232	J002	0.0266481	25.6246	4.14709e-07	2.27484e-05	0.981264	1.63064	2.2821	chr3R	10962066	10962162	97	-	68	45	0	13	0.2006	0.1579	INF	0.8667
CG6912	intronretention_Junction_52232	intronretentionright-Junction_52232	J001	0.0965933	27.4417	1.61902e-07	9.88892e-06	1.70978	0.778334	-3.32868	chr3R	10962114	10962192	79	-	271	240	0	2	0.7404	0.8421	INF	0.0556
CG6912	intronretention_Junction_52232	intronretentionright-Junction_52232	J002	0.0944679	27.8418	1.31652e-07	8.1665e-06	1.163	1.9186	2.59523	chr3R	10962145	10962241	97	-	95	45	0	34	0.2596	0.1579	INF	0.9444	-0.635032
Rpb7	intronretention_Junction_52373	intronretentionleft-Junction_52373	J001	0.0225875	14.1753	0.000166543	0.00368708	2.35586	2.47939	0.411923	chr3R	11048172	11048228	57	-	0	245	494	575	INF	0.8974	0.9744	0.9713
Rpb7	intronretention_Junction_52373	intronretentionleft-Junction_52373	J002	0.0324826	11.8464	0.000577722	0.0101622	1.41731	0.974202	-1.57755	chr3R	11048124	11048220	97	-	0	28	13	17	INF	0.1026	0.0256	0.0287
Rpb7	intronretention_Junction_52373	intronretentionright-Junction_52373	J001	0.0314079	10.8837	0.00097014	0.0153679	2.36236	2.47443	0.373701	chr3R	11048172	11048228	57	-	0	245	494	575	INF	0.9211	0.9763	0.9829
Rpb7	intronretention_Junction_52373	intronretentionright-Junction_52373	J002	0.0626735	7.50605	0.0061492	0.0637724	1.30485	0.85412	-1.64141	chr3R	11048181	11048277	97	-	0	21	12	10	INF	0.0789	0.0237	0.0171	0.120157
CG5044	intronretention_Junction_52599	intronretentionleft-Junction_52599	J001	0.0241648	9.49759	0.00205742	0.0276432	1.99881	1.83475	-0.551721	chr3R	11184529	11184786	258	+	67	169	67	43	0.7053	0.5993	0.4467	0.4135
CG5044	intronretention_Junction_52599	intronretentionleft-Junction_52599	J002	0.0239656	9.54191	0.00200832	0.0272039	1.7794	1.94947	0.572836	chr3R	11184481	11184577	97	+	28	113	83	61	0.2947	0.4007	0.5533	0.5865
CG5044	intronretention_Junction_52599	intronretentionright-Junction_52599	J001	0.0531537	4.678	0.0305512	0.200837	1.99188	1.84487	-0.494362	chr3R	11184529	11184786	258	+	67	169	67	43	0.6569	0.5652	0.482	0.3386
CG5044	intronretention_Junction_52599	intronretentionright-Junction_52599	J002	0.053004	4.68788	0.0303762	0.200083	1.8407	1.98763	0.49414	chr3R	11184739	11184835	97	+	35	130	72	84	0.3431	0.4348	0.518	0.6614	-0.197527
CG6171	intronretention_Junction_52608	intronretentionleft-Junction_52608	J001	0.0488071	7.75497	0.00535649	0.0572202	1.76075	1.52086	-0.815797	chr3R	11188819	11188872	54	-	32	67	25	49	0.4211	0.482	0.1736	0.2865
CG6171	intronretention_Junction_52608	intronretentionleft-Junction_52608	J002	0.0490323	7.72918	0.00543353	0.057981	1.82667	2.03144	0.68841	chr3R	11188772	11188867	96	-	44	72	119	122	0.5789	0.518	0.8264	0.7135
CG6171	intronretention_Junction_52608	intronretentionright-Junction_52608	J001	0.018542	9.49475	0.00206061	0.0276674	1.73816	1.5427	-0.664653	chr3R	11188819	11188872	54	-	32	67	25	49	0.4923	0.4295	0.2252	0.2934
CG6171	intronretention_Junction_52608	intronretentionright-Junction_52608	J002	0.0186172	9.47724	0.00208037	0.0278576	1.82941	1.97662	0.495261	chr3R	11188825	11188921	97	-	33	89	86	118	0.5077	0.5705	0.7748	0.7066	-0.154596
Fer2	intronretention_Junction_53196	intronretentionleft-Junction_53196	J001	0.0231984	11.4187	0.000727069	0.0122172	2.55022	2.74222	0.639285	chr3R	11975637	11975691	55	-	203	0	1734	2334	0.7463	INF	0.878	0.9022
Fer2	intronretention_Junction_53196	intronretentionleft-Junction_53196	J002	0.023046	11.4747	0.000705482	0.0119554	2.09047	1.83591	-0.855052	chr3R	11975589	11975685	97	-	69	0	241	253	0.2537	INF	0.122	0.0978
Fer2	intronretention_Junction_53196	intronretentionright-Junction_53196	J001	0.0105965	13.217	0.000277419	0.00556851	2.58311	2.71404	0.435908	chr3R	11975637	11975691	55	-	203	0	1734	2334	0.832	INF	0.9228	0.9299
Fer2	intronretention_Junction_53196	intronretentionright-Junction_53196	J002	0.0101555	13.4645	0.000243125	0.00498995	1.90133	1.62264	-0.942377	chr3R	11975644	11975740	97	-	41	0	145	176	0.168	INF	0.0772	0.0701	0.182767
Fer2	intronretention_Junction_53200	intronretentionleft-Junction_53200	J001	0.0631189	13.1637	0.000285431	0.0057178	1.34724	1.79918	1.54458	chr3R	11975904	11976012	109	-	9	0	230	376	0.1233	INF	0.5793	0.458
Fer2	intronretention_Junction_53200	intronretentionleft-Junction_53200	J002	0.0632611	13.1431	0.000288579	0.00577348	2.17089	1.79672	-1.25642	chr3R	11975856	11975952	97	-	64	0	167	445	0.8767	INF	0.4207	0.542
Fer2	intronretention_Junction_53200	intronretentionright-Junction_53200	J001	0.0151615	54.4293	1.61145e-13	3.60529e-11	1.23117	1.92441	2.37293	chr3R	11975904	11976012	109	-	9	0	230	376	0.0968	INF	0.6336	0.594
Fer2	intronretention_Junction_53200	intronretentionright-Junction_53200	J002	0.0149539	54.751	1.36812e-13	3.16768e-11	2.1699	1.73441	-1.4637	chr3R	11975965	11976061	97	-	84	0	133	257	0.9032	INF	0.3664	0.406	0.334053
CG10326	intronretention_Junction_53639	intronretentionleft-Junction_53639	J001	0.0526174	14.1898	0.000165268	0.0036646	2.67341	2.94908	0.9172	chr3R	12470105	12470268	164	+	0	573	1317	1457	INF	0.8967	0.9828	0.9726
CG10326	intronretention_Junction_53639	intronretentionleft-Junction_53639	J002	0.051772	14.3729	0.000149948	0.0034162	1.73393	1.32757	-1.39252	chr3R	12470058	12470153	96	+	0	66	23	41	INF	0.1033	0.0172	0.0274
CG10326	intronretention_Junction_53639	intronretentionright-Junction_53639	J001	0.0356979	6.1816	0.0129085	0.10933	2.75443	2.86733	0.375646	chr3R	12470105	12470268	164	+	0	573	1317	1457	INF	0.9566	0.9865	0.9805
CG10326	intronretention_Junction_53639	intronretentionright-Junction_53639	J002	0.0429723	5.54505	0.018533	0.142153	1.41297	1.12609	-1.00832	chr3R	12470221	12470317	97	+	0	26	18	29	INF	0.0434	0.0135	0.0195	0.100329
Dscam3	intronretention_Junction_53957	intronretentionleft-Junction_53957	J001	0.0526469	4.09726	0.0429527	0.255378	1.88914	1.72124	-0.566703	chr3R	13301065	13301364	300	-	215	309	0	31	0.8566	0.9062	INF	0.7209
Dscam3	intronretention_Junction_53957	intronretentionleft-Junction_53957	J002	0.0559682	3.97272	0.046243	0.268687	1.03307	1.32766	1.04941	chr3R	13301018	13301113	96	-	36	32	0	12	0.1434	0.0938	INF	0.2791
Dscam3	intronretention_Junction_53957	intronretentionright-Junction_53957	J001	0.217715	4.68913	0.030354	0.200003	1.97613	1.62551	-1.18397	chr3R	13301065	13301364	300	-	215	309	0	31	0.86	0.9508	INF	0.62
Dscam3	intronretention_Junction_53957	intronretentionright-Junction_53957	J002	0.234184	4.41706	0.0355812	0.223923	0.992952	1.42185	1.52371	chr3R	13301317	13301413	97	-	35	16	0	19	0.14	0.0492	INF	0.38	-0.308647
vib	intronretention_Junction_56271	intronretentionleft-Junction_56271	J001	0.00773376	175.512	4.62707e-40	9.21343e-37	2.51701	1.87791	-2.13787	chr3R	15044060	15044122	63	-	171	0	178	423	0.8341	INF	0.1884	0.1977
vib	intronretention_Junction_56271	intronretentionleft-Junction_56271	J002	0.0076037	177.04	2.14667e-40	4.74938e-37	1.82768	2.48826	2.21133	chr3R	15044012	15044108	97	-	34	0	767	1717	0.1659	INF	0.8116	0.8023
vib	intronretention_Junction_56271	intronretentionright-Junction_56271	J001	0.057761	47.3474	5.94565e-12	1.0033e-09	2.54032	1.84114	-2.33942	chr3R	15044060	15044122	63	-	171	0	178	423	0.9344	INF	0.2459	0.3379
vib	intronretention_Junction_56271	intronretentionright-Junction_56271	J002	0.0572137	47.7127	4.93479e-12	8.39842e-10	1.41686	2.20322	2.65949	chr3R	15044075	15044168	94	-	12	0	546	829	0.0656	INF	0.7541	0.6621	-0.657091
NONE	intronretention_Junction_56943	intronretentionleft-Junction_56943	J001	0.0130521	13.741	0.000209827	0.00441657	1.56196	1.27319	-0.998198	chr3R	1607539	1607719	181	-	27	24	21	29	0.4091	0.4528	0.1927	0.2117
NONE	intronretention_Junction_56943	intronretentionleft-Junction_56943	J002	0.0122669	13.9947	0.000183326	0.00399385	1.68325	1.84908	0.560556	chr3R	1607491	1607587	97	-	39	29	88	108	0.5909	0.5472	0.8073	0.7883
NONE	intronretention_Junction_56943	intronretentionright-Junction_56943	J001	0.0395583	3.82627	0.0504551	0.285821	1.50713	1.32619	-0.625234	chr3R	1607539	1607719	181	-	27	24	21	29	0.3462	0.4286	0.1842	0.2843
NONE	intronretention_Junction_56943	intronretentionright-Junction_56943	J002	0.0379471	3.91561	0.0478396	0.275472	1.71071	1.83891	0.433173	chr3R	1607672	1607768	97	-	51	32	93	73	0.6538	0.5714	0.8158	0.7157	-0.135533
Stat92E	intronretention_Junction_57139	intronretentionleft-Junction_57139	J001	0.0968256	22.1429	2.53094e-06	0.000115853	1.50576	0.682538	-3.02484	chr3R	16364437	16364941	505	-	0	57	4	4	INF	0.6196	0.0417	0.0976
Stat92E	intronretention_Junction_57139	intronretentionleft-Junction_57139	J002	0.0800552	25.3711	4.72945e-07	2.56602e-05	1.29854	1.80867	1.74645	chr3R	16364390	16364485	96	-	0	35	92	37	INF	0.3804	0.9583	0.9024
Stat92E	intronretention_Junction_57139	intronretentionright-Junction_57139	J001	0.0478201	25.1389	5.3346e-07	2.87088e-05	1.45225	0.723283	-2.67215	chr3R	16364437	16364941	505	-	0	57	4	4	INF	0.5135	0.0635	0.0727
Stat92E	intronretention_Junction_57139	intronretentionright-Junction_57139	J002	0.037567	28.6294	8.76428e-08	5.64772e-06	1.42768	1.78066	1.20339	chr3R	16364894	16364990	97	-	0	54	59	51	INF	0.4865	0.9365	0.9273	-0.355769
CG5621	intronretention_Junction_57593	intronretentionleft-Junction_57593	J001	0.0610232	8.01272	0.00464498	0.0513268	1.30511	0.921432	-1.38541	chr3R	16732875	16732932	58	+	58	15	3	5	0.5859	0.4688	0.12	0.3125
CG5621	intronretention_Junction_57593	intronretentionleft-Junction_57593	J002	0.0593561	8.12622	0.00436295	0.049006	1.21427	1.50302	1.00406	chr3R	16732827	16732923	97	+	41	17	22	11	0.4141	0.5312	0.88	0.6875
CG5621	intronretention_Junction_57593	intronretentionright-Junction_57593	J001	0.128268	4.85117	0.0276273	0.186923	1.2504	0.97021	-1.01079	chr3R	16732875	16732932	58	+	58	15	3	5	0.3412	0.6	0.1154	0.2
CG5621	intronretention_Junction_57593	intronretentionright-Junction_57593	J002	0.122236	4.97461	0.025722	0.177839	1.45701	1.66623	0.714853	chr3R	16732885	16732980	96	+	112	10	23	20	0.6588	0.4	0.8846	0.8	-0.215318
pre-mod(mdg4)-U	intronretention_Junction_58202	intronretentionleft-Junction_58202	J001	0.0730825	4.99634	0.025401	0.17617	1.18226	1.47025	1.00506	chr3R	17192483	17192694	212	+	0	18	39	50	INF	0.25	0.4699	0.6173
pre-mod(mdg4)-U	intronretention_Junction_58202	intronretentionleft-Junction_58202	J002	0.0702259	5.14189	0.0233551	0.166148	1.64682	1.40548	-0.826647	chr3R	17192435	17192531	97	+	0	54	44	31	INF	0.75	0.5301	0.3827
pre-mod(mdg4)-U	intronretention_Junction_58202	intronretentionright-Junction_58202	J001	0.0283597	4.87016	0.027325	0.185508	1.21233	1.43436	0.774818	chr3R	17192483	17192694	212	+	0	18	39	50	INF	0.3	0.5652	0.495
pre-mod(mdg4)-U	intronretention_Junction_58202	intronretentionright-Junction_58202	J002	0.0270291	4.97838	0.025666	0.177698	1.56913	1.39285	-0.605729	chr3R	17192647	17192743	97	+	0	42	30	51	INF	0.7	0.4348	0.505	0.204066
spen	intronretention_Junction_6337	intronretentionleft-Junction_6337	J001	0.0655117	11.1304	0.000849242	0.0138494	0.792657	1.32002	1.93468	chr2L	186855	186908	54	+	0	10	21	20	INF	0.1429	0.5122	0.6061
spen	intronretention_Junction_6337	intronretentionleft-Junction_6337	J002	0.0391276	14.6561	0.000129017	0.00305105	1.51605	1.23247	-0.984399	chr2L	186807	186903	97	+	0	60	20	13	INF	0.8571	0.4878	0.3939
spen	intronretention_Junction_6337	intronretentionright-Junction_6337	J001	0.0487779	9.12543	0.00252081	0.0322586	0.838559	1.26698	1.56903	chr2L	186855	186908	54	+	0	10	21	20	INF	0.1887	0.5526	0.5714
spen	intronretention_Junction_6337	intronretentionright-Junction_6337	J002	0.0322955	10.9971	0.000912527	0.0146771	1.42653	1.16582	-0.913021	chr2L	186861	186957	97	+	0	43	17	15	INF	0.8113	0.4474	0.4286	0.300872
Tsp97E	intronretention_Junction_63482	intronretentionleft-Junction_63482	J001	0.0190469	32.6466	1.10535e-08	9.48698e-07	2.29031	2.48829	0.660378	chr3R	22788173	22788260	88	-	88	169	348	585	0.7719	0.8284	0.9482	0.9606
Tsp97E	intronretention_Junction_63482	intronretentionleft-Junction_63482	J002	0.0193961	32.3712	1.27363e-08	1.07006e-06	1.66793	1.18473	-1.67134	chr3R	22788126	22788221	96	-	26	35	19	24	0.2281	0.1716	0.0518	0.0394
Tsp97E	intronretention_Junction_63482	intronretentionright-Junction_63482	J001	0.00775865	14.634	0.000130538	0.00307243	2.34041	2.43675	0.321346	chr3R	22788173	22788260	88	-	88	169	348	585	0.7788	0.7972	0.8946	0.8959
Tsp97E	intronretention_Junction_63482	intronretentionright-Junction_63482	J002	0.00757147	14.7525	0.000122586	0.00293382	1.76532	1.51901	-0.837596	chr3R	22788213	22788310	98	-	25	43	41	68	0.2212	0.2028	0.1054	0.1041	0.199872
Pcd	intronretention_Junction_65888	intronretentionleft-Junction_65888	J001	0.0306043	4.78854	0.0286496	0.192404	1.19119	0.87368	-1.16588	chr3R	25549488	25549567	80	+	45	19	3	3	0.3309	0.2603	0.1667	0.1
Pcd	intronretention_Junction_65888	intronretentionleft-Junction_65888	J002	0.0254944	5.06387	0.0244297	0.171156	1.53161	1.66319	0.448486	chr3R	25549444	25549536	93	+	91	54	15	27	0.6691	0.7397	0.8333	0.9
Pcd	intronretention_Junction_65888	intronretentionright-Junction_65888	J001	0.0422325	9.37171	0.0022036	0.0290776	1.24167	0.826829	-1.52565	chr3R	25549488	25549567	80	+	45	19	3	3	0.5422	0.4222	0.2	0.1304
Pcd	intronretention_Junction_65888	intronretentionright-Junction_65888	J002	0.0382845	9.70932	0.00183336	0.0254042	1.24487	1.49541	0.869924	chr3R	25549520	25549616	97	+	38	26	12	20	0.4578	0.5778	0.8	0.8696	-0.14527
CG42740	intronretention_Junction_66572	intronretentionleft-Junction_66572	J001	0.102637	13.0072	0.000310292	0.0061478	1.99165	1.6413	-1.18238	chr3R	26247075	26247183	109	-	141	93	52	18	0.8443	0.7881	0.5306	0.2903
CG42740	intronretention_Junction_66572	intronretentionleft-Junction_66572	J002	0.102859	12.9846	0.000314062	0.00621013	1.34973	1.73681	1.32513	chr3R	26247027	26247123	97	-	26	25	46	44	0.1557	0.2119	0.4694	0.7097
CG42740	intronretention_Junction_66572	intronretentionright-Junction_66572	J001	0.0746626	10.3413	0.00130083	0.019437	1.9546	1.677	-0.936753	chr3R	26247075	26247183	109	-	141	93	52	18	0.6714	0.6242	0.4062	0.2195
CG42740	intronretention_Junction_66572	intronretentionright-Junction_66572	J002	0.0744381	10.366	0.00128355	0.019231	1.68892	1.96473	0.930311	chr3R	26247136	26247237	102	-	69	56	76	64	0.3286	0.3758	0.5938	0.7805	-0.345116
CG1091	intronretention_Junction_67693	intronretentionleft-Junction_67693	J001	0.0186015	27.2889	1.7521e-07	1.05084e-05	2.00935	1.67867	-1.11486	chr3R	2909613	2909668	56	-	0	131	85	54	INF	0.7616	0.3617	0.4091
CG1091	intronretention_Junction_67693	intronretentionleft-Junction_67693	J002	0.0185645	27.322	1.72242e-07	1.0393e-05	1.50675	1.89315	1.31067	chr3R	2909565	2909661	97	-	0	41	150	78	INF	0.2384	0.6383	0.5909
CG1091	intronretention_Junction_67693	intronretentionright-Junction_67693	J001	0.040538	32.3858	1.26408e-08	1.06654e-06	2.08428	1.6111	-1.59568	chr3R	2909613	2909668	56	-	0	131	85	54	INF	0.9097	0.3812	0.4779
CG1091	intronretention_Junction_67693	intronretentionright-Junction_67693	J002	0.0405121	32.3999	1.2549e-08	1.0633e-06	1.09915	1.76452	2.30494	chr3R	2909621	2909716	96	-	0	13	138	59	INF	0.0903	0.6188	0.5221	-0.452806
CG2993	intronretention_Junction_68062	intronretentionleft-Junction_68062	J001	0.0170834	14.1904	0.000165215	0.0036646	2.12189	1.93809	-0.616365	chr3R	3632492	3632632	141	-	166	162	58	81	0.6484	0.72	0.4874	0.45
CG2993	intronretention_Junction_68062	intronretentionleft-Junction_68062	J002	0.0167881	14.3399	0.000152595	0.00346463	1.79182	1.99711	0.690827	chr3R	3632444	3632540	97	-	90	63	61	99	0.3516	0.28	0.5126	0.55
CG2993	intronretention_Junction_68062	intronretentionright-Junction_68062	J001	0.0538555	4.97165	0.025766	0.17802	2.11431	1.94512	-0.567355	chr3R	3632492	3632632	141	-	166	162	58	81	0.595	0.7105	0.3973	0.5159
CG2993	intronretention_Junction_68062	intronretentionright-Junction_68062	J002	0.0534468	5.00273	0.0253073	0.175643	1.84856	2.02243	0.584416	chr3R	3632585	3632681	97	-	113	66	88	76	0.405	0.2895	0.6027	0.4841	-0.204983
CG9775	intronretention_Junction_68965	intronretentionleft-Junction_68965	J001	0.00755964	23.1468	1.50094e-06	7.34317e-05	2.17344	1.98247	-0.63976	chr3R	465279	465354	76	-	70	185	140	77	0.5932	0.625	0.4082	0.3793
CG9775	intronretention_Junction_68965	intronretentionleft-Junction_68965	J002	0.00755099	23.1594	1.49109e-06	7.33103e-05	1.96798	2.16188	0.64978	chr3R	465231	465327	97	-	48	111	203	126	0.4068	0.375	0.5918	0.6207
CG9775	intronretention_Junction_68965	intronretentionright-Junction_68965	J001	0.0600785	4.88567	0.0270806	0.184163	2.17772	1.98823	-0.634756	chr3R	465279	465354	76	-	70	185	140	77	0.4667	0.6106	0.3933	0.2917
CG9775	intronretention_Junction_68965	intronretentionright-Junction_68965	J002	0.0602417	4.87378	0.0272676	0.185245	2.06258	2.24917	0.624238	chr3R	465307	465403	97	-	80	118	216	187	0.5333	0.3894	0.6067	0.7083	-0.176256
MED31	intronretention_Junction_68999	intronretentionleft-Junction_68999	J001	0.0150037	5.75604	0.0164321	0.130774	1.83536	1.93585	0.338235	chr3R	468380	468471	92	+	38	67	136	80	0.623	0.7053	0.8047	0.8
MED31	intronretention_Junction_68999	intronretentionleft-Junction_68999	J002	0.0157039	5.66505	0.0173063	0.135191	1.52577	1.33737	-0.650106	chr3R	468332	468428	97	+	23	28	33	20	0.377	0.2947	0.1953	0.2
MED31	intronretention_Junction_68999	intronretentionright-Junction_68999	J001	0.11624	3.84856	0.0497886	0.283174	1.78066	1.99773	0.730624	chr3R	468380	468471	92	+	38	67	136	80	0.3585	0.5776	0.7727	0.64
MED31	intronretention_Junction_68999	intronretentionright-Junction_68999	J002	0.116072	3.85345	0.0496437	0.282644	1.81712	1.58999	-0.769918	chr3R	468424	468520	97	+	68	49	40	45	0.6415	0.4224	0.2273	0.36	0.221295
CG16789	intronretention_Junction_69829	intronretentionleft-Junction_69829	J001	0.076805	8.06803	0.0045053	0.0501171	1.66231	1.323	-1.1657	chr3R	5394676	5394731	56	+	0	62	18	39	INF	0.5741	0.1698	0.2786
CG16789	intronretention_Junction_69829	intronretentionleft-Junction_69829	J002	0.075529	8.17433	0.00424874	0.0481507	1.53414	1.83562	1.02309	chr3R	5394628	5394724	97	+	0	46	88	101	INF	0.4259	0.8302	0.7214
CG16789	intronretention_Junction_69829	intronretentionright-Junction_69829	J001	0.0248288	18.1728	2.01738e-05	0.000653171	1.66976	1.31128	-1.23189	chr3R	5394676	5394731	56	+	0	62	18	39	INF	0.6392	0.2338	0.2826
CG16789	intronretention_Junction_69829	intronretentionright-Junction_69829	J002	0.0241094	18.4581	1.73683e-05	0.000572577	1.42483	1.74043	1.0772	chr3R	5394684	5394779	96	+	0	35	59	99	INF	0.3608	0.7662	0.7174	-0.297431
atms	intronretention_Junction_70275	intronretentionleft-Junction_70275	J001	0.111639	9.74395	0.00179914	0.0251048	1.86604	1.52794	-1.14681	chr3R	576608	576669	62	+	108	80	34	16	0.5427	0.3791	0.1977	0.1006
atms	intronretention_Junction_70275	intronretentionleft-Junction_70275	J002	0.112838	9.65401	0.00188938	0.0260176	1.94523	2.25824	1.04826	chr3R	576560	576656	97	+	91	131	138	143	0.4573	0.6209	0.8023	0.8994
atms	intronretention_Junction_70275	intronretentionright-Junction_70275	J001	0.174797	5.09654	0.0239736	0.169338	1.83772	1.55675	-0.952848	chr3R	576608	576669	62	+	108	80	34	16	0.6667	0.4167	0.3036	0.1481
atms	intronretention_Junction_70275	intronretentionright-Junction_70275	J002	0.175211	5.08576	0.0241231	0.170052	1.79654	2.06797	0.912515	chr3R	576622	576718	97	+	54	112	78	92	0.3333	0.5833	0.6964	0.8519	-0.237405
Syn	intronretention_Junction_70550	intronretentionleft-Junction_70550	J001	0.231204	6.79978	0.00911693	0.0847905	1.6825	2.15501	1.58981	chr3R	6029870	6029932	63	+	24	72	152	117	0.3038	0.1054	0.4841	0.7091
Syn	intronretention_Junction_70550	intronretentionleft-Junction_70550	J002	0.232377	6.76631	0.00928947	0.0857858	2.52527	2.06084	-1.55107	chr3R	6029822	6029918	97	+	55	611	162	48	0.6962	0.8946	0.5159	0.2909
Syn	intronretention_Junction_70550	intronretentionright-Junction_70550	J001	0.159359	13.6667	0.000218294	0.00457064	1.63412	2.2036	1.91661	chr3R	6029870	6029932	63	+	24	72	152	117	0.3333	0.1252	0.6696	0.7597
Syn	intronretention_Junction_70550	intronretentionright-Junction_70550	J002	0.160609	13.5654	0.000230392	0.0047837	2.39398	1.83249	-1.88079	chr3R	6029885	6029981	97	+	48	503	75	37	0.6667	0.8748	0.3304	0.2403	0.360134
Gel	intronretention_Junction_71058	intronretentionleft-Junction_71058	J001	0.0605659	13.4629	0.000243333	0.00498995	2.59176	2.27755	-1.04771	chr3R	66246	66309	64	+	0	1293	135	76	INF	0.9493	0.8036	0.7103
Gel	intronretention_Junction_71058	intronretentionleft-Junction_71058	J002	0.0599995	13.5742	0.00022932	0.0047664	1.33079	1.75713	1.45979	chr3R	66198	66294	97	+	0	69	33	31	INF	0.0507	0.1964	0.2897
Gel	intronretention_Junction_71058	intronretentionright-Junction_71058	J001	0.0878704	12.0009	0.000531759	0.00951337	2.59312	2.27674	-1.05495	chr3R	66246	66309	64	+	0	1293	135	76	INF	0.9788	0.8824	0.8085
Gel	intronretention_Junction_71058	intronretentionright-Junction_71058	J002	0.10527	10.2166	0.00139185	0.0205597	0.967033	1.51125	1.9274	chr3R	66262	66358	97	+	0	28	18	18	INF	0.0212	0.1176	0.1915	-0.263313
Actbeta	intronretention_Junction_74486	intronretentionleft-Junction_74486	J001	0.0113627	16.7112	4.35241e-05	0.00124162	2.70454	2.5862	-0.394036	chr4	1098455	1098510	56	-	553	245	477	522	0.9437	0.9176	0.8457	0.8586
Actbeta	intronretention_Junction_74486	intronretentionleft-Junction_74486	J002	0.0110863	16.9286	3.88129e-05	0.00113154	1.56039	1.83047	0.915989	chr4	1098407	1098503	97	-	33	22	87	86	0.0563	0.0824	0.1543	0.1414
Actbeta	intronretention_Junction_74486	intronretentionright-Junction_74486	J001	0.0206641	8.91981	0.00282094	0.0349103	2.71188	2.57829	-0.444794	chr4	1098455	1098510	56	-	553	245	477	522	0.9066	0.8566	0.7897	0.7921
Actbeta	intronretention_Junction_74486	intronretentionright-Junction_74486	J002	0.0204737	8.9831	0.00272487	0.0341029	1.81335	2.0035	0.639632	chr4	1098463	1098559	97	-	57	41	127	137	0.0934	0.1434	0.2103	0.2079	-0.132255
NONE	intronretention_Junction_75047	intronretentionleft-Junction_75047	J001	0.0625544	14.3949	0.000148207	0.00338428	2.52968	2.22915	-1.00263	chr4	1288665	1288727	63	+	176	153	305	397	0.9167	0.8547	0.5777	0.6916
NONE	intronretention_Junction_75047	intronretentionleft-Junction_75047	J002	0.0622168	14.4588	0.000143262	0.00329785	1.64901	1.99423	1.16484	chr4	1288618	1288713	96	+	16	26	223	177	0.0833	0.1453	0.4223	0.3084
NONE	intronretention_Junction_75047	intronretentionright-Junction_75047	J001	0.0137046	7.20089	0.00728676	0.0718643	2.43023	2.32869	-0.338737	chr4	1288665	1288727	63	+	176	153	305	397	0.8381	0.7688	0.6979	0.6953
NONE	intronretention_Junction_75047	intronretentionright-Junction_75047	J002	0.0134004	7.29541	0.00691309	0.0693329	1.82324	1.97085	0.496685	chr4	1288680	1288772	93	+	34	46	132	174	0.1619	0.2312	0.3021	0.3047	-0.232946
NONE	intronretention_Junction_75128	intronretentionleft-Junction_75128	J001	0.019055	96.4141	9.31998e-23	5.45822e-20	1.86646	0.950165	-3.19574	chr4	1307481	1307598	118	+	15	33	21	27	0.4688	0.4783	0.031	0.0444
NONE	intronretention_Junction_75128	intronretentionleft-Junction_75128	J002	0.0181952	98.0973	3.98326e-23	2.47858e-20	1.90893	2.31669	1.3655	chr4	1307433	1307529	97	+	17	36	657	581	0.5312	0.5217	0.969	0.9556
NONE	intronretention_Junction_75128	intronretentionright-Junction_75128	J001	0.194387	8.21354	0.0041579	0.0473098	1.63222	1.17232	-1.59415	chr4	1307481	1307598	118	+	15	33	21	27	0.0949	0.3084	0.0248	0.0358
NONE	intronretention_Junction_75128	intronretentionright-Junction_75128	J002	0.191733	8.31844	0.00392447	0.0451439	2.2636	2.65931	1.31924	chr4	1307551	1307643	93	+	143	74	827	728	0.9051	0.6916	0.9752	0.9642	-0.14116
CG32000	intronretention_Junction_75296	intronretentionleft-Junction_75296	J001	0.0328281	61.4722	4.49045e-15	1.2083e-12	0.60792	1.60708	3.69165	chr4	154339	154419	81	+	2	3	38	60	0.0171	0.0261	0.4634	0.3681
CG32000	intronretention_Junction_75296	intronretentionleft-Junction_75296	J002	0.0306716	63.3393	1.73999e-15	4.91115e-13	2.14553	1.77524	-1.24413	chr4	154295	154387	93	+	115	112	44	103	0.9829	0.9739	0.5366	0.6319
CG32000	intronretention_Junction_75296	intronretentionright-Junction_75296	J001	0.0393055	44.7044	2.2914e-11	3.53692e-09	0.655205	1.54693	3.28138	chr4	154339	154419	81	+	2	3	38	60	0.0217	0.0189	0.3654	0.2691
CG32000	intronretention_Junction_75296	intronretentionright-Junction_75296	J002	0.0374612	45.7266	1.35961e-11	2.25605e-09	2.2475	1.9024	-1.1564	chr4	154372	154467	96	+	90	156	66	163	0.9783	0.9811	0.6346	0.7309	0.210037
dpr7	intronretention_Junction_75581	intronretentionleft-Junction_75581	J001	0.144874	5.59033	0.0180599	0.139597	1.12548	0.693143	-1.65067	chr4	273337	273448	112	-	29	0	4	3	0.6304	INF	0.25	0.1429
dpr7	intronretention_Junction_75581	intronretentionleft-Junction_75581	J002	0.116877	6.41293	0.0113293	0.0986393	0.919919	1.24707	1.18752	chr4	273291	273385	95	-	17	0	12	18	0.3696	INF	0.75	0.8571
dpr7	intronretention_Junction_75581	intronretentionright-Junction_75581	J001	0.116562	8.65441	0.00326271	0.0389959	1.14329	0.678613	-1.77534	chr4	273337	273448	112	-	29	0	4	3	0.725	INF	0.2222	0.1765
dpr7	intronretention_Junction_75581	intronretentionright-Junction_75581	J002	0.118854	8.5541	0.00344745	0.0407744	0.775479	1.20589	1.60191	chr4	273401	273493	93	-	11	0	14	14	0.275	INF	0.7778	0.8235	-0.399248
bip2	intronretention_Junction_76410	intronretentionleft-Junction_76410	J001	0.018899	17.4763	2.90917e-05	0.000899493	2.83256	2.6546	-0.592225	chr4	480767	480827	61	-	520	817	422	488	0.8725	0.8998	0.7815	0.7316
bip2	intronretention_Junction_76410	intronretentionleft-Junction_76410	J002	0.0188482	17.5136	2.85263e-05	0.000887526	1.92921	2.16709	0.797447	chr4	480719	480815	97	-	76	91	118	179	0.1275	0.1002	0.2185	0.2684
bip2	intronretention_Junction_76410	intronretentionright-Junction_76410	J001	0.0873834	4.90809	0.0267312	0.182912	2.85003	2.63756	-0.707086	chr4	480767	480827	61	-	520	817	422	488	0.8012	0.9028	0.7314	0.6658
bip2	intronretention_Junction_76410	intronretentionright-Junction_76410	J002	0.0875784	4.89768	0.0268928	0.183319	2.05324	2.27711	0.748888	chr4	480780	480876	97	-	129	88	155	245	0.1988	0.0972	0.2686	0.3342	-0.19762
zfh2	intronretention_Junction_76516	intronretentionleft-Junction_76516	J001	0.359547	4.05044	0.0441597	0.2596	1.97298	2.34735	1.25257	chr4	559230	559283	54	+	28	118	124	445	0.1879	0.5315	0.6294	0.8674
zfh2	intronretention_Junction_76516	intronretentionleft-Junction_76516	J002	0.357801	4.06963	0.0436607	0.257854	2.14199	1.76668	-1.26122	chr4	559182	559278	97	+	121	104	73	68	0.8121	0.4685	0.3706	0.1326
zfh2	intronretention_Junction_76516	intronretentionright-Junction_76516	J001	0.218249	7.04455	0.00795069	0.0769636	1.96901	2.35103	1.27817	chr4	559230	559283	54	+	28	118	124	445	0.2014	0.4556	0.6526	0.8318
zfh2	intronretention_Junction_76516	intronretentionright-Junction_76516	J002	0.217355	7.07211	0.00782931	0.0760475	2.19217	1.80758	-1.29094	chr4	559236	559332	97	+	111	141	66	90	0.7986	0.5444	0.3474	0.1682	0.388349
RpS3A	intronretention_Junction_76905	intronretentionleft-Junction_76905	J001	0.0312903	6.90285	0.00860582	0.0811744	2.14871	2.29224	0.479689	chr4	86675	86729	55	-	126	72	212	357	0.7368	0.7423	0.8314	0.8925
RpS3A	intronretention_Junction_76905	intronretentionleft-Junction_76905	J002	0.0306987	6.99131	0.00819066	0.0783018	1.70389	1.49041	-0.72776	chr4	86627	86723	97	-	45	25	43	43	0.2632	0.2577	0.1686	0.1075
RpS3A	intronretention_Junction_76905	intronretentionright-Junction_76905	J001	0.0438676	9.7258	0.00181699	0.0252901	2.12843	2.31207	0.613767	chr4	86675	86729	55	-	126	72	212	357	0.8182	0.75	0.8983	0.9395
RpS3A	intronretention_Junction_76905	intronretentionright-Junction_76905	J002	0.0444704	9.63961	0.00190425	0.026168	1.56097	1.25867	-1.04582	chr4	86682	86778	97	-	28	24	24	23	0.1818	0.25	0.1017	0.0605	0.187811
unc-13	intronretention_Junction_77045	intronretentionleft-Junction_77045	J001	0.0221101	33.4514	7.30687e-09	6.58346e-07	2.10159	1.77872	-1.08529	chr4	923208	923450	243	-	154	89	39	87	0.5662	0.6449	0.2229	0.2788
unc-13	intronretention_Junction_77045	intronretentionleft-Junction_77045	J002	0.0223468	33.2169	8.24298e-09	7.36028e-07	1.9382	2.23244	0.9857	chr4	923160	923256	97	-	118	49	136	225	0.4338	0.3551	0.7771	0.7212
unc-13	intronretention_Junction_77045	intronretentionright-Junction_77045	J001	0.00868383	36.4416	1.57308e-09	1.69314e-07	2.07777	1.80578	-0.914157	chr4	923208	923450	243	-	154	89	39	87	0.6311	0.6096	0.3545	0.3118
unc-13	intronretention_Junction_77045	intronretentionright-Junction_77045	J002	0.00869557	36.4182	1.59206e-09	1.70436e-07	1.86295	2.11865	0.858304	chr4	923403	923499	97	-	90	57	71	192	0.3689	0.3904	0.6455	0.6882	-0.275334
Spase25	intronretention_Junction_79623	intronretentionleft-Junction_79623	J001	0.0908023	8.09925	0.00442835	0.0494544	2.03072	2.31656	0.956086	chrX	11380198	11380267	70	+	32	53	309	745	0.086	0.1963	0.3348	0.378
Spase25	intronretention_Junction_79623	intronretentionleft-Junction_79623	J002	0.0906941	8.10817	0.00440662	0.0493502	2.83318	2.56023	-0.908596	chrX	11380150	11380246	97	+	340	217	614	1226	0.914	0.8037	0.6652	0.622
Spase25	intronretention_Junction_79623	intronretentionright-Junction_79623	J001	0.098754	6.72389	0.009513	0.087011	2.04202	2.30527	0.880492	chrX	11380198	11380267	70	+	32	53	309	745	0.1576	0.3442	0.522	0.5141
Spase25	intronretention_Junction_79623	intronretentionright-Junction_79623	J002	0.0985985	6.73363	0.00946119	0.0867363	2.53309	2.27648	-0.855844	chrX	11380220	11380316	97	+	171	101	283	704	0.8424	0.6558	0.478	0.4859	0.166467
na	intronretention_Junction_83675	intronretentionleft-Junction_83675	J001	0.0931465	7.36563	0.00664824	0.0674371	1.73522	1.454	-0.959035	chrX	14168049	14168235	187	+	48	76	22	25	0.8136	0.8261	0.6667	0.3968
na	intronretention_Junction_83675	intronretentionleft-Junction_83675	J002	0.102347	6.85005	0.00886389	0.0830969	1.09851	1.4604	1.27113	chrX	14168001	14168097	97	+	11	16	11	38	0.1864	0.1739	0.3333	0.6032
na	intronretention_Junction_83675	intronretentionright-Junction_83675	J001	0.0154234	11.8781	0.000567966	0.0100349	1.68751	1.49826	-0.645293	chrX	14168049	14168235	187	+	48	76	22	25	0.7742	0.7308	0.4681	0.5208
na	intronretention_Junction_83675	intronretentionright-Junction_83675	J002	0.0169563	11.5438	0.000679755	0.0116292	1.23349	1.50809	0.953527	chrX	14168188	14168284	97	+	14	28	25	23	0.2258	0.2692	0.5319	0.4792	-0.31043
CG15027	intronretention_Junction_85224	intronretentionleft-Junction_85224	J001	0.133007	7.83411	0.00512693	0.0553019	1.46205	1.05039	-1.4514	chrX	14979753	14979819	67	-	13	27	17	11	0.3023	0.4909	0.1619	0.0701
CG15027	intronretention_Junction_85224	intronretentionleft-Junction_85224	J002	0.123161	8.32517	0.00390994	0.0450027	1.61161	1.9256	1.06155	chrX	14979707	14979801	95	-	30	28	88	146	0.6977	0.5091	0.8381	0.9299
CG15027	intronretention_Junction_85224	intronretentionright-Junction_85224	J001	0.231573	4.37434	0.036484	0.227948	1.4343	1.07856	-1.25339	chrX	14979753	14979819	67	-	13	27	17	11	0.3095	0.6923	0.2048	0.131
CG15027	intronretention_Junction_85224	intronretentionright-Junction_85224	J002	0.217957	4.60495	0.0318798	0.207244	1.42869	1.73811	1.05606	chrX	14979772	14979868	97	-	29	12	66	73	0.6905	0.3077	0.7952	0.869	-0.21815
Arp6	intronretention_Junction_85766	intronretentionleft-Junction_85766	J001	0.0936648	11.4071	0.000731624	0.0122627	1.57795	1.1959	-1.32545	chrX	15630324	15630378	55	-	36	51	10	15	0.5806	0.4048	0.101	0.1974
Arp6	intronretention_Junction_85766	intronretentionleft-Junction_85766	J002	0.0926313	11.5006	0.00069573	0.0118304	1.64784	1.9599	1.05354	chrX	15630277	15630372	96	-	26	75	89	61	0.4194	0.5952	0.899	0.8026
Arp6	intronretention_Junction_85766	intronretentionright-Junction_85766	J001	0.0530001	10.095	0.00148673	0.0217415	1.54844	1.22427	-1.12422	chrX	15630324	15630378	55	-	36	51	10	15	0.3214	0.2464	0.0662	0.1351
Arp6	intronretention_Junction_85766	intronretentionright-Junction_85766	J002	0.0530283	10.0915	0.00148958	0.0217452	1.97147	2.18629	0.719674	chrX	15630331	15630427	97	-	76	156	141	96	0.6786	0.7536	0.9338	0.8649	-0.156422
sun	intronretention_Junction_86028	intronretentionleft-Junction_86028	J001	0.21095	9.83526	0.00171198	0.0242453	1.55164	1.09041	-1.61328	chrX	15742037	15742329	293	-	71	82	8	2	0.3838	0.1737	0.0548	0.015
sun	intronretention_Junction_86028	intronretentionleft-Junction_86028	J002	0.213176	9.75267	0.00179062	0.0250242	2.07292	2.47654	1.34821	chrX	15741989	15742085	97	-	114	390	138	131	0.6162	0.8263	0.9452	0.985
sun	intronretention_Junction_86028	intronretentionright-Junction_86028	J001	0.0209088	35.9373	2.03772e-09	2.0915e-07	1.61886	1.01789	-2.10681	chrX	15742037	15742329	293	-	71	82	8	2	0.4277	0.4713	0.125	0.0377
sun	intronretention_Junction_86028	intronretentionright-Junction_86028	J002	0.0209884	35.8869	2.09114e-09	2.13532e-07	1.70276	2.00776	1.02784	chrX	15742282	15742376	95	-	95	92	56	51	0.5723	0.5287	0.875	0.9623	-0.174244
UBL3	intronretention_Junction_86037	intronretentionleft-Junction_86037	J001	0.0571269	6.11723	0.013387	0.112332	2.6804	2.86505	0.614447	chrX	15744743	15745119	377	-	496	617	690	551	0.6757	0.6714	0.8756	0.7772
UBL3	intronretention_Junction_86037	intronretentionleft-Junction_86037	J002	0.0572747	6.10251	0.013499	0.112986	2.36737	2.17131	-0.654829	chrX	15744695	15744791	97	-	238	302	98	158	0.3243	0.3286	0.1244	0.2228
UBL3	intronretention_Junction_86037	intronretentionright-Junction_86037	J001	0.0152451	20.2657	6.73965e-06	0.000266136	2.688	2.8567	0.561365	chrX	15744743	15745119	377	-	496	617	690	551	0.7504	0.7524	0.9008	0.8623
UBL3	intronretention_Junction_86037	intronretentionright-Junction_86037	J002	0.0152984	20.2125	6.92987e-06	0.000271629	2.20836	1.97629	-0.777285	chrX	15745072	15745168	97	-	165	203	76	88	0.2496	0.2476	0.0992	0.1377	0.194159
Cul2	intronretention_Junction_8608	intronretentionleft-Junction_8608	J001	0.0343091	3.34468	0.0674226	0.347892	0.987981	1.23682	0.896973	chr2L	21658854	21659093	240	+	0	11	18	34	INF	0.2037	0.4091	0.3778
Cul2	intronretention_Junction_8608	intronretentionleft-Junction_8608	J002	0.0233486	3.90034	0.0482763	0.277025	1.55021	1.42429	-0.432427	chr2L	21658806	21658902	97	+	0	43	26	56	INF	0.7963	0.5909	0.6222
Cul2	intronretention_Junction_8608	intronretentionright-Junction_8608	J001	0.0381234	6.28287	0.012191	0.104184	0.946601	1.2808	1.20569	chr2L	21658854	21659093	240	+	0	11	18	34	INF	0.2075	0.4615	0.5075
Cul2	intronretention_Junction_8608	intronretentionright-Junction_8608	J002	0.0275262	7.26351	0.00703695	0.0702355	1.49582	1.298	-0.684865	chr2L	21659046	21659141	96	+	0	42	21	33	INF	0.7925	0.5385	0.4925	0.16209
mmd	intronretention_Junction_86460	intronretentionleft-Junction_86460	J001	0.0269148	14.2469	0.000160324	0.00359907	2.49747	2.3063	-0.637586	chrX	15856484	15856567	84	-	255	487	178	156	0.9011	0.9035	0.7149	0.8041
mmd	intronretention_Junction_86460	intronretentionleft-Junction_86460	J002	0.0265119	14.3984	0.00014793	0.00338184	1.53756	1.82787	0.985244	chrX	15856436	15856532	97	-	28	52	71	38	0.0989	0.0965	0.2851	0.1959
mmd	intronretention_Junction_86460	intronretentionright-Junction_86460	J001	0.00896723	9.72948	0.00181336	0.0252855	2.44969	2.35168	-0.32689	chrX	15856484	15856567	84	-	255	487	178	156	0.807	0.8368	0.7092	0.7324
mmd	intronretention_Junction_86460	intronretentionright-Junction_86460	J002	0.00877883	9.83641	0.00171091	0.0242453	1.77369	1.94449	0.575415	chrX	15856520	15856616	97	-	61	95	73	57	0.193	0.1632	0.2908	0.2676	-0.167554
CG3262	intronretention_Junction_8875	intronretentionleft-Junction_8875	J001	0.136141	6.68398	0.0097283	0.0885734	1.58327	1.26477	-1.10049	chr2L	22246534	22246645	112	+	43	31	22	13	0.4574	0.2296	0.1302	0.0747
CG3262	intronretention_Junction_8875	intronretentionleft-Junction_8875	J002	0.135644	6.70471	0.00961588	0.0877906	1.91012	2.18099	0.90812	chr2L	22246486	22246582	97	+	51	104	147	161	0.5426	0.7704	0.8698	0.9253
CG3262	intronretention_Junction_8875	intronretentionright-Junction_8875	J001	0.0895138	9.04336	0.0026365	0.0333007	1.59211	1.25527	-1.16406	chr2L	22246534	22246645	112	+	43	31	22	13	0.3525	0.2279	0.1202	0.0583
CG3262	intronretention_Junction_8875	intronretentionright-Junction_8875	J002	0.0894129	9.05145	0.00262487	0.0332708	1.98773	2.24979	0.877326	chr2L	22246598	22246693	96	+	79	105	161	210	0.6475	0.7721	0.8798	0.9417	-0.1386
cib	intronretention_Junction_96741	intronretentionleft-Junction_96741	J001	0.0134392	7.22755	0.00717932	0.0713702	1.88018	2.0053	0.420479	chrX	4004043	4004183	141	+	43	0	395	311	0.7167	INF	0.87	0.8761
cib	intronretention_Junction_96741	intronretentionleft-Junction_96741	J002	0.0134936	7.22004	0.00720941	0.0715622	1.48875	1.19162	-1.03536	chrX	4003995	4004091	97	+	17	0	59	44	0.2833	INF	0.13	0.1239
cib	intronretention_Junction_96741	intronretentionright-Junction_96741	J001	0.396237	6.5347	0.010579	0.0936822	1.63217	2.24019	2.04553	chrX	4004043	4004183	141	+	43	0	395	311	0.3554	INF	0.9634	0.836
cib	intronretention_Junction_96741	intronretentionright-Junction_96741	J002	0.391853	6.60345	0.0101782	0.0913328	1.88499	1.27054	-2.10177	chrX	4004136	4004232	97	+	78	0	15	61	0.6446	INF	0.0366	0.164	0.483313
NONE	intronretention-Junction_2020	intronretentionshort-Junction_2020	J001	0.0131684	14.4344	0.000145124	0.003333	0.993979	1.41919	1.51072	chr2L	11524196	11524219	24	+	4	4	68	44	0.1212	0.1333	0.3842	0.4
NONE	intronretention-Junction_2020	intronretentionshort-Junction_2020	J002	0.0125621	14.5686	0.000135148	0.00314517	1.79182	1.60845	-0.621636	chr2L	11524182	11524234	53	+	29	26	109	66	0.8788	0.8667	0.6158	0.6	0.264818

## Sheet: AS MXE events
Gene	AS_event_ID	AS_structure_ID	sub_junction_ID	sub-junction_dispersion_estimate	LRT_statistic-full_vs_reduced	LRT_p_value-full_vs_reduced	BH_adjusted_p-values	LNd	LNv	fitting_parameter_log2fold_change_LNv_LNd	sub_junction_chr	sub_junction_start_coor	sub_junction_end_coor	sub_junction_size	sub_junction_strand	raw_count.LNd_A	raw_count.LNd_B	raw_count.LNv_A	raw_count.LNv_B	percentage_usage.LNd_A	percentage_usage.LNd_B	percentage_usage.LNv_A	percentage_usage.LNv_B	deltaPSI
Gs1l	5_Junction_10655_Junction_10656*3_Junction_10657_Junction_10658	3_Junction_10657_Junction_10658	J001	0.0691977	0.175362	0.67539	1	1.88056	1.81976	-0.204862	chr2L	4456075	4456384	310	-	24	73	76	124	0.1472	0.258	0.1453	0.2095	0.0252
Gs1l	5_Junction_10655_Junction_10656*3_Junction_10657_Junction_10658	3_Junction_10657_Junction_10658	J002	0.0697804	0.173754	0.676797	1	2.42743	2.48137	0.179805	chr2L	4456332	4456384	53	-	139	210	447	468	0.8528	0.742	0.8547	0.7905	-0.0252
Gs1l	5_Junction_10655_Junction_10656*3_Junction_10657_Junction_10658	5_Junction_10655_Junction_10656	J001	0.00817614	14.0004	0.000182776	0.00399062	1.9883	1.81044	-0.598444	chr2L	4455738	4455855	118	-	38	91	120	68	0.475	0.4691	0.3117	0.2787	0.17685
Gs1l	5_Junction_10655_Junction_10656*3_Junction_10657_Junction_10658	5_Junction_10655_Junction_10656	J002	0.00839376	13.8471	0.000198297	0.00423204	2.03909	2.17771	0.464136	chr2L	4455738	4456112	375	-	42	103	265	176	0.525	0.5309	0.6883	0.7213	-0.17685
aPKC	5_Junction_15764_Junction_15765*3_Junction_15767_Junction_15768	3_Junction_15767_Junction_15768	J001	0.33812	3.99927	0.0455201	0.26565	1.6948	2.03364	1.14164	chr2R	10834324	10835145	822	-	115	37	52	92	0.8099	0.4868	0.8667	0.9684	-0.2692
aPKC	5_Junction_15764_Junction_15765*3_Junction_15767_Junction_15768	3_Junction_15767_Junction_15768	J002	0.347447	3.90701	0.0480851	0.276167	1.36051	0.978695	-1.36413	chr2R	10834805	10835145	341	-	27	39	8	3	0.1901	0.5132	0.1333	0.0316	0.2692
aPKC	5_Junction_15764_Junction_15765*3_Junction_15767_Junction_15768	5_Junction_15764_Junction_15765	J001	0.663436	1.60451	0.205266	0.671986	1.86159	2.16939	1.03266	chr2R	10834108	10834207	100	-	179	33	74	138	0.9323	0.4714	0.9024	0.9787	-0.2387
aPKC	5_Junction_15764_Junction_15765*3_Junction_15767_Junction_15768	5_Junction_15764_Junction_15765	J002	0.686623	1.55382	0.212572	0.684133	1.28153	0.953952	-1.18073	chr2R	10834108	10834682	575	-	13	37	8	3	0.0677	0.5286	0.0976	0.0213	0.2387
Nmda1	5_Junction_31676_Junction_31677*3_Junction_31679_Junction_31683	3_Junction_31679_Junction_31683	J001	0.334613	7.94065	0.00483363	0.0529705	1.83189	1.23359	-2.05293	chr2R	8766651	8767192	542	-	25	88	19	18	0.1603	0.5677	0.05	0.028	0.325
Nmda1	5_Junction_31676_Junction_31677*3_Junction_31679_Junction_31683	3_Junction_31679_Junction_31683	J002	0.336409	7.89973	0.00494421	0.0538267	2.05086	2.62531	1.91777	chr2R	8766727	8767192	466	-	131	67	361	626	0.8397	0.4323	0.95	0.972	-0.325
Nmda1	5_Junction_31676_Junction_31677*3_Junction_31679_Junction_31683	5_Junction_31676_Junction_31677	J001	0.20055	6.50233	0.0107733	0.0948358	2.44112	2.02073	-1.40509	chr2R	8766215	8766555	341	-	93	313	138	135	0.4266	0.7313	0.2639	0.1577	0.36815
Nmda1	5_Junction_31676_Junction_31677*3_Junction_31679_Junction_31683	5_Junction_31676_Junction_31677	J002	0.199861	6.52437	0.0106406	0.0940001	2.19918	2.61499	1.38692	chr2R	8766215	8766700	486	-	125	115	385	721	0.5734	0.2687	0.7361	0.8423	-0.36815
bbc	5_Junction_32121_Junction_32124*3_Junction_32127_Junction_32136	3_Junction_32127_Junction_32136	J001	0.436195	2.47851	0.115412	0.4914	1.3916	1.85487	1.57844	chr2R	9376553	9378938	2386	-	18	15	118	83	0.6207	0.119	0.6667	0.7411	-0.33405
bbc	5_Junction_32121_Junction_32124*3_Junction_32127_Junction_32136	3_Junction_32127_Junction_32136	J002	0.436181	2.47859	0.115406	0.4914	1.96874	1.50861	-1.55839	chr2R	9378376	9378938	563	-	11	111	59	29	0.3793	0.881	0.3333	0.2589	0.33405
bbc	5_Junction_32121_Junction_32124*3_Junction_32127_Junction_32136	5_Junction_32121_Junction_32124	J001	0.314899	3.8787	0.0489023	0.279409	1.1086	1.58332	1.65576	chr2R	9375637	9376420	784	-	10	10	48	40	0.4	0.0763	0.5217	0.6154	-0.3304
bbc	5_Junction_32121_Junction_32124*3_Junction_32127_Junction_32136	5_Junction_32121_Junction_32124	J002	0.310034	3.93697	0.0472358	0.272705	1.93054	1.48598	-1.50768	chr2R	9375637	9378243	2607	-	15	121	44	25	0.6	0.9237	0.4783	0.3846	0.3304
Rdl	5_Junction_49825_Junction_49826*3_Junction_49834_Junction_49839	3_Junction_49834_Junction_49839	J001	0.168393	1.10603	0.292947	0.798616	2.35407	2.25396	-0.334218	chr3L	9151178	9154362	3185	-	271	362	177	67	0.9155	0.9027	0.9124	0.7204	0.0927
Rdl	5_Junction_49825_Junction_49826*3_Junction_49834_Junction_49839	3_Junction_49834_Junction_49839	J002	0.168792	1.10367	0.293462	0.799155	1.37649	1.49217	0.399009	chr3L	9152847	9154362	1516	-	25	39	17	26	0.0845	0.0973	0.0876	0.2796	-0.0927
Rdl	5_Junction_49825_Junction_49826*3_Junction_49834_Junction_49839	5_Junction_49825_Junction_49826	J001	0.0506289	14.9634	0.000109616	0.00268887	2.28599	2.08927	-0.657775	chr3L	9148410	9151039	2630	-	306	312	106	42	0.9592	0.9689	0.876	0.7636	0.14425
Rdl	5_Junction_49825_Junction_49826*3_Junction_49834_Junction_49839	5_Junction_49825_Junction_49826	J002	0.0652529	13.0402	0.000304869	0.00606414	0.909079	1.3708	1.66084	chr3L	9148410	9152708	4299	-	13	10	15	13	0.0408	0.0311	0.124	0.2364	-0.14425

## Sheet: Notes
See https://github.com/qqwang-berkeley/JUM/wiki/0.c-Output-files for a detailed explanation of the JUM output
Differentially spliced AS events in LNd neurons compared to LNv neurons, in five conventionally recognized AS categories: cassette exon, A5SS (alternative 5' splice site), A3SS (alternative 3' splice site), intron retention and MXE (mutually exclusively spliced exons)
1) Each tab represents the differentially spliced AS events in each AS pattern category
2) Each spreadsheet contains the following information for each AS junction:
Gene	The gene that the AS event is associated with.
AS event ID	The AS event ID
AS structure ID	The AS structures that the specific AS event covers.
sub_junction ID	the sub_AS_junctions that each AS structure includes from the specific AS event.
	The first four columns specify the ID of the AS event, the gene it is associated with, and the basic structure of the AS event in terms of JUM definition (refer to the JUM paper for details). In JUM, each AS event will contain several AS_structures and each AS_structure contains several sub_AS_junctions.
	Each cassette exon AS event, intron retention event with intron size larger than read length, and MXE AS event has two AS structures, and each AS structure has two sub-AS-junctions. As a result each AS event will have four lines in the final output specifying the differential splicing and structure of the AS event.
	Each intron retention event with intron size smaller than the read length has one AS structure that has two sub-AS-junctions. As a result each of these small intron retention AS event will have two lines in the final output specifying the differential splicing and structure of the AS events.
	Each A5SS and A3SS AS events has one AS structure and each AS structure has several sub-AS-junctions, depending on how many alternative 5' or 3' splice sites the AS event covers. As a result each A5SS and A3SS AS event will have multiple lines in the final output specifying the differential splicing and structure of the AS event.
sub-junction_dispersion_estimate	The estimated dispersion parameter when modeling the count data as negative binomial distributions. Each sub_AS_junction receives one dispersion parameter. This is for monitoring purpose and users can ignore this information.
LRT_statistic-full_vs_reduced	The statistic calculated to perform a statistic test for differential AS between two conditions, checking whether the corresponding sub_AS_junction is differentially spliced between the two conditions under comparison. This is calculated from comparing two generalized linear models. Monitoring purpose only. Users can skip this information.
LRT_p_value-full_vs_reduced	The pvalue of the statistical test for differential AS analysis. This is to test whether the corresponding sub_AS_junction is significantly differentially spliced between the two conditions under comparison.
BH_adjusted_p-values	Corrected pvalue for differential AS analysis between conditions
LNd
LNv
fitting_parameter_log2fold_change_LNv_LNd	Columns 9-11 all contain intermediate information calculated during the generalized linear model fitting for differential AS analysis. Users can skip this information.
sub_junction_chr
sub_junction_start_coor
sub_junction_end_coor
sub_junction_size
sub_junction_strand	Columns 12-16 specify the chromosome coordinates, strand, size, etc. information of the specific sub_AS_junction.
raw_count.LNd_A
raw_count.LNd_B
raw_count.LNv_A
raw_count.LNv_B	The raw read counts of reads that mapped to the sub_AS_junction in each of the neuron group sample replicates.
percentage_usage.LNd_A
percentage_usage.LNd_B
percentage_usage.LNv_A
percentage_usage.LNv_B	The percentage usage of that sub_AS_junction in the AS structure in each of the neuron group sample replicates. If the sub_AS_junction is significantly differentially spliced between two neuron groups, users can detect a significant difference in the percentage usage between the two neuron groups
delta Percent spliced In (deltaPSI)	This column describes the level of changes of that significantly differentially spliced AS event between two neuron groups.
	For a cassette exon event, each AS event contains two AS_structures that include four sub_AS_junctions in total. So each cassette exon AS event will have four lines in the cassette exon output file. One deltaPSI value will be calculated for each cassette exon AS event (aka, every four lines). deltaPSI here is calculated as the difference in the ratio of exon_inclusion_isoform between LNd and LNv …
	deltaPSI = exon_inclusion_isoform \ (exon_inclusion_isoform + exon_exclusion_isoform) (under LNd) - exon_inclusion_isoform \ (exon_inclusion_isoform + exon_exclsion_isoform) (under LNv).
	For an intron retention event, each AS event contains either two AS_structures with four sub_AS_junctions (when the intron size is longer than the RNA-seq read length) and so four lines in the intron_retention output file, or one AS_Structure and two sub_AS_junctions (when the intron size is smaller than the RNA-seq read length) and so two lines in the output file . One deltaPSI value is calculat…
	deltaPSI = intron_inclusion_isoform / (intron_inclusion_isoform+intron_exclusion_isoform) (under LNd) - intron_inclusion_isoform / (intron_inclusion_isoform+intron_exclusion_isoform) (under LNv)
	For an A5SS or A3SS, each AS event contains one AS structure and several sub_AS_junctions, depending on how many alternative 5'/3' splice sites are there. One deltaPSI value is calculated for EACH sub_AS_junction (so, every line). Here deltaPSI is calculated as the change in the percentage of usage for each sub_AS_junctionbetween LNd and LNv samples:
	deltaPSI = sub_AS_junction_i / (sub_AS_junction_1+sub_AS_junction_2+ ... +sub_AS_junction_i+ ...+sub_AS_junction_n) (under LNd) - sub_AS_junction_i / (sub_AS_junction_1+sub_AS_junction_2+ ... + sub_AS_junction_i+...+sub_AS_junction_n) (under LNv). It is calculated this way because A5SS and A3SS events usually have more than two alternative splicing isoforms (not like cassette exon and intron rete…
