# Supplementary material for: Striking circadian neuron diversity and cycling of Drosophila alternative splicing
Source: eLife journal article supplement (doi:10.7554/elife.35618), 2018-06-04
Supplement: supp [file elife-35618-supp-v1.zip › elife_poa_e35618_Figure_3_source_data_6.xlsx]

## Sheet: AS cassette exon events
Gene	AS_event_ID	AS_structure_ID	sub_junction_ID	sub-junction_dispersion_estimate	LRT_statistic-full_vs_reduced	LRT_p_value-full_vs_reduced	BH_adjusted_p-values	DN1	LNv	fitting_parameter_log2fold_change_LNv_DN1	sub_junction_chr	sub_junction_start_coor	sub_junction_end_coor	sub_junction_size	sub_junction_strand	raw_count.DN1_A	raw_count.DN1_B	raw_count.LNv_A	raw_count.LNv_B	percentage_usage.DN1_A	percentage_usage.DN1_B	percentage_usage.LNv_A	percentage_usage.LNv_B	deltaPSI
Rala	3_Junction_102861_Junction_102864*5_Junction_102860_Junction_102861	3_Junction_102861_Junction_102864	J001	0.0185516	0.429739	0.512117	0.812768	11.6929	11.4794	-0.0816212	chrX	3600284	3602775	2492	-	59	70	80	139	0.831	0.7778	0.7339	0.7943
Rala	3_Junction_102861_Junction_102864*5_Junction_102860_Junction_102861	3_Junction_102861_Junction_102864	J002	0.0201258	0.42045	0.516713	0.816225	6.97841	7.32871	0.172065	chrX	3601524	3602775	1252	-	12	20	29	36	0.169	0.2222	0.2661	0.2057
Rala	3_Junction_102861_Junction_102864*5_Junction_102860_Junction_102861	5_Junction_102860_Junction_102861	J001	0.0397207	6.62163	0.0100748	0.0638925	9.00791	7.26309	-0.793171	chrX	3600284	3601399	1116	-	45	32	24	27	0.4327	0.3137	0.2308	0.1627
Rala	3_Junction_102861_Junction_102864*5_Junction_102860_Junction_102861	5_Junction_102860_Junction_102861	J002	0.0384049	6.7725	0.00925729	0.0599055	10.8759	12.3248	0.554188	chrX	3600284	3602775	2492	-	59	70	80	139	0.5673	0.6863	0.7692	0.8373	0.103616
Fas2	3_Junction_103393_Junction_103394*5_Junction_103392_Junction_103393	3_Junction_103393_Junction_103394	J001	0.0379434	7.13349	0.00756572	0.051776	11.3018	9.67824	-0.646912	chrX	4028936	4030600	1665	-	34	41	112	96	0.5965	0.7885	0.4686	0.4593
Fas2	3_Junction_103393_Junction_103394*5_Junction_103392_Junction_103393	3_Junction_103393_Junction_103394	J002	0.0380434	7.12247	0.00761239	0.0519763	8.46747	10.1857	0.724077	chrX	4029530	4030600	1071	-	23	11	127	113	0.4035	0.2115	0.5314	0.5407
Fas2	3_Junction_103393_Junction_103394*5_Junction_103392_Junction_103393	5_Junction_103392_Junction_103393	J001	0.0182049	1.72831	0.188627	0.474082	7.43479	8.23309	0.370364	chrX	4028936	4029442	507	-	16	12	56	61	0.32	0.2264	0.3333	0.3885
Fas2	3_Junction_103393_Junction_103394*5_Junction_103392_Junction_103393	5_Junction_103392_Junction_103393	J002	0.0174572	1.75554	0.185182	0.468745	10.766	10.1822	-0.23251	chrX	4028936	4030600	1665	-	34	41	112	96	0.68	0.7736	0.6667	0.6115	-0.185581
elav	3_Junction_103469_Junction_103477*5_Junction_103467_Junction_103469	3_Junction_103469_Junction_103477	J001	0.0190479	1.78393	0.181668	0.46326	11.7035	11.0135	-0.265887	chrX	413275	417017	3743	-	97	80	69	74	0.5	0.4848	0.4662	0.3627
elav	3_Junction_103469_Junction_103477*5_Junction_103467_Junction_103469	3_Junction_103469_Junction_103477	J002	0.0189554	1.78977	0.180954	0.462118	11.8146	12.4667	0.245253	chrX	415729	417017	1289	-	97	85	79	130	0.5	0.5152	0.5338	0.6373
elav	3_Junction_103469_Junction_103477*5_Junction_103467_Junction_103469	5_Junction_103467_Junction_103469	J001	0.0231769	7.86769	0.00503259	0.0378703	8.61169	10.1695	0.653936	chrX	413275	415471	2197	-	36	32	74	50	0.2707	0.2857	0.5175	0.4032
elav	3_Junction_103469_Junction_103477*5_Junction_103467_Junction_103469	5_Junction_103467_Junction_103469	J002	0.0227422	7.95569	0.00479364	0.0365409	12.029	10.699	-0.51259	chrX	413275	417017	3743	-	97	80	69	74	0.7293	0.7143	0.4825	0.5968	-0.112841
Trf2	3_Junction_109614_Junction_109897*5_Junction_109613_Junction_109614	3_Junction_109614_Junction_109897	J001	0.0453092	22.7706	1.82538e-06	5.32517e-05	4.09133	8.06771	2.25834	chrX	8304722	8317215	12494	+	3	3	95	39	0.0698	0.0556	0.4545	0.3305
Trf2	3_Junction_109614_Junction_109897*5_Junction_109613_Junction_109614	3_Junction_109614_Junction_109897	J002	0.0440479	23.0855	1.54955e-06	4.64677e-05	12.1799	9.28682	-1.14441	chrX	8312459	8317215	4757	+	40	51	114	79	0.9302	0.9444	0.5455	0.6695
Trf2	3_Junction_109614_Junction_109897*5_Junction_109613_Junction_109614	5_Junction_109613_Junction_109614	J001	0.0329467	35.8733	2.10571e-09	1.34161e-07	18.0495	15.4411	-0.906541	chrX	8304722	8312382	7661	+	232	216	673	179	0.9872	0.9863	0.8763	0.8211
Trf2	3_Junction_109614_Junction_109897*5_Junction_109613_Junction_109614	5_Junction_109613_Junction_109614	J002	0.0347136	35.0292	3.24798e-09	1.99442e-07	3.83364	8.51667	2.66025	chrX	8304722	8317215	12494	+	3	3	95	39	0.0128	0.0137	0.1237	0.1789	0.108501
pog	3_Junction_11635_Junction_11636*5_Junction_11634_Junction_11635	3_Junction_11635_Junction_11636	J001	0.0374161	14.4181	0.000146387	0.00224883	13.3569	15.6609	0.823932	chr2L	4874169	4874885	717	+	203	154	249	110	0.5399	0.5366	0.8384	0.7285
pog	3_Junction_11635_Junction_11636*5_Junction_11634_Junction_11635	3_Junction_11635_Junction_11636	J002	0.0376696	14.3384	0.000152719	0.00232558	12.7537	10.2679	-0.954962	chr2L	4874562	4874885	324	+	173	133	48	41	0.4601	0.4634	0.1616	0.2715
pog	3_Junction_11635_Junction_11636*5_Junction_11634_Junction_11635	5_Junction_11634_Junction_11635	J001	0.0547221	5.19882	0.0226022	0.114574	11.9039	10.1482	-0.685157	chr2L	4874169	4874540	372	+	120	106	48	45	0.3715	0.4077	0.1616	0.2903
pog	3_Junction_11635_Junction_11636*5_Junction_11634_Junction_11635	5_Junction_11634_Junction_11635	J002	0.0542549	5.23764	0.0221033	0.112756	13.6662	15.3391	0.598053	chr2L	4874169	4874885	717	+	203	154	249	110	0.6285	0.5923	0.8384	0.7097	0.240916
CG34126	3_Junction_11793_Junction_11794*5_Junction_11792_Junction_11793	3_Junction_11793_Junction_11794	J001	0.014204	50.6167	1.12287e-12	1.42942e-10	10.4158	12.6378	0.852793	chr2L	4988848	4990306	1459	+	68	51	120	111	0.5913	0.6375	0.9302	0.9487
CG34126	3_Junction_11793_Junction_11794*5_Junction_11792_Junction_11793	3_Junction_11793_Junction_11794	J002	0.0155915	49.0865	2.44919e-12	2.93238e-10	8.84756	4.30984	-2.44246	chr2L	4989410	4990306	897	+	47	29	9	6	0.4087	0.3625	0.0698	0.0513
CG34126	3_Junction_11793_Junction_11794*5_Junction_11792_Junction_11793	5_Junction_11792_Junction_11793	J001	0.0174429	36.7499	1.34295e-09	8.88143e-08	7.93321	3.78039	-2.44031	chr2L	4988848	4989388	541	+	32	22	8	4	0.32	0.3014	0.0625	0.0348
CG34126	3_Junction_11793_Junction_11794*5_Junction_11792_Junction_11793	5_Junction_11792_Junction_11793	J002	0.0151116	38.3293	5.97589e-10	4.34459e-08	10.6241	12.415	0.687049	chr2L	4988848	4990306	1459	+	68	51	120	111	0.68	0.6986	0.9375	0.9652	0.415341
qtc	3_Junction_11928_Junction_11931*5_Junction_11926_Junction_11928	3_Junction_11928_Junction_11931	J001	0.0224827	31.6861	1.81218e-08	9.26425e-07	14.8775	12.0681	-1.0248	chr2L	5068394	5070095	1702	+	267	233	108	43	0.3504	0.3442	0.1475	0.096
qtc	3_Junction_11928_Junction_11931*5_Junction_11926_Junction_11928	3_Junction_11928_Junction_11931	J002	0.0223254	31.8631	1.65433e-08	8.54547e-07	17.4821	19.927	0.836614	chr2L	5069219	5070095	877	+	495	444	624	405	0.6496	0.6558	0.8525	0.904
qtc	3_Junction_11928_Junction_11931*5_Junction_11926_Junction_11928	5_Junction_11926_Junction_11928	J001	0.00441584	40.3371	2.13707e-10	1.7359e-08	15.3521	16.9053	0.543066	chr2L	5068394	5069125	732	+	322	288	318	144	0.5467	0.5528	0.7465	0.7701
qtc	3_Junction_11928_Junction_11931*5_Junction_11926_Junction_11928	5_Junction_11926_Junction_11928	J002	0.00444709	40.215	2.27494e-10	1.83418e-08	14.5416	12.403	-0.779534	chr2L	5068394	5070095	1702	+	267	233	108	43	0.4533	0.4472	0.2535	0.2299	-0.156134
frj	3_Junction_12901_Junction_12903*5_Junction_12900_Junction_12901	3_Junction_12901_Junction_12903	J001	0.0132669	11.6965	0.000626164	0.0072839	11.3844	12.8429	0.549298	chr2L	6457916	6458169	254	+	41	46	232	199	0.4271	0.4381	0.6572	0.594
frj	3_Junction_12901_Junction_12903*5_Junction_12900_Junction_12901	3_Junction_12901_Junction_12903	J002	0.0133554	11.6572	0.000639542	0.00740535	12.4134	10.8875	-0.582768	chr2L	6458095	6458169	75	+	55	59	121	136	0.5729	0.5619	0.3428	0.406
frj	3_Junction_12901_Junction_12903*5_Junction_12900_Junction_12901	5_Junction_12900_Junction_12901	J001	0.00937838	0.923097	0.336663	0.66069	12.6696	12.2854	-0.143173	chr2L	6457916	6458085	170	+	49	57	210	218	0.5444	0.5534	0.4751	0.5228
frj	3_Junction_12901_Junction_12903*5_Junction_12900_Junction_12901	5_Junction_12900_Junction_12901	J002	0.00938532	0.922801	0.336741	0.660714	11.9055	12.3053	0.150526	chr2L	6457916	6458169	254	+	41	46	232	199	0.4556	0.4466	0.5249	0.4772	0.102612
CG4495	3_Junction_13495_Junction_13496*5_Junction_13493_Junction_13495	3_Junction_13495_Junction_13496	J001	0.154137	16.2669	5.50167e-05	0.000997705	8.81208	12.9707	1.64124	chr2L	7184203	7184613	411	+	34	34	150	126	0.2906	0.3864	0.7812	0.9197
CG4495	3_Junction_13495_Junction_13496*5_Junction_13493_Junction_13495	3_Junction_13495_Junction_13496	J002	0.1556	16.1337	5.90248e-05	0.00105847	11.2423	7.16758	-1.74551	chr2L	7184394	7184613	220	+	83	54	42	11	0.7094	0.6136	0.2188	0.0803
CG4495	3_Junction_13495_Junction_13496*5_Junction_13493_Junction_13495	5_Junction_13493_Junction_13495	J001	0.15083	18.9083	1.37153e-05	0.000306596	12.2859	7.86409	-1.81095	chr2L	7184203	7184384	182	+	112	76	52	12	0.7671	0.6909	0.2574	0.087
CG4495	3_Junction_13495_Junction_13496*5_Junction_13493_Junction_13495	5_Junction_13493_Junction_13495	J002	0.150345	18.9621	1.33341e-05	0.000299687	8.67101	13.1377	1.764	chr2L	7184203	7184613	411	+	34	34	150	126	0.2329	0.3091	0.7426	0.913	0.552301
Ziz	3_Junction_13756_Junction_13757*5_Junction_13755_Junction_13756	3_Junction_13756_Junction_13757	J001	0.135592	5.6379	0.0175762	0.0961735	3.21092	5.16057	1.472	chr2L	7483627	7495511	11885	-	2	3	18	15	0.0909	0.15	0.5806	0.3061
Ziz	3_Junction_13756_Junction_13757*5_Junction_13755_Junction_13756	3_Junction_13756_Junction_13757	J002	0.12656	5.8493	0.0155832	0.0881666	7.80573	6.05996	-0.879229	chr2L	7492226	7495511	3286	-	20	17	13	34	0.9091	0.85	0.4194	0.6939
Ziz	3_Junction_13756_Junction_13757*5_Junction_13755_Junction_13756	5_Junction_13755_Junction_13756	J001	0.0225078	6.36438	0.0116434	0.0712585	7.44636	6.3767	-0.538387	chr2L	7483627	7492183	8557	-	18	14	28	27	0.9	0.8235	0.6087	0.6429
Ziz	3_Junction_13756_Junction_13757*5_Junction_13755_Junction_13756	5_Junction_13755_Junction_13756	J002	0.026331	6.17401	0.0129641	0.0769278	3.24674	5.09674	1.3985	chr2L	7483627	7495511	11885	-	2	3	18	15	0.1	0.1765	0.3913	0.3571	0.182109
Opa1	3_Junction_16246_Junction_16247*5_Junction_16245_Junction_16246	3_Junction_16246_Junction_16247	J001	0.022446	4.35571	0.0368851	0.161068	10.9419	12.0191	0.413465	chr2R	10121847	10122196	350	-	94	55	77	105	0.3431	0.2558	0.399	0.443
Opa1	3_Junction_16246_Junction_16247*5_Junction_16245_Junction_16246	3_Junction_16246_Junction_16247	J002	0.0221991	4.38862	0.0361795	0.158724	14.1711	13.2148	-0.346744	chr2R	10122064	10122196	133	-	180	160	116	132	0.6569	0.7442	0.601	0.557
Opa1	3_Junction_16246_Junction_16247*5_Junction_16245_Junction_16246	5_Junction_16245_Junction_16246	J001	0.0398347	4.22851	0.0397503	0.169669	12.3346	11.207	-0.428876	chr2R	10121847	10121946	100	-	115	100	45	100	0.5502	0.6452	0.3689	0.4878
Opa1	3_Junction_16246_Junction_16247*5_Junction_16245_Junction_16246	5_Junction_16245_Junction_16246	J002	0.0399143	4.22248	0.0398919	0.170082	10.9094	12.0484	0.437231	chr2R	10121847	10122196	350	-	94	55	77	105	0.4498	0.3548	0.6311	0.5122	0.109427
Trpm	3_Junction_17139_Junction_17142*5_Junction_17138_Junction_17139	3_Junction_17139_Junction_17142	J001	0.0166964	19.5596	9.75118e-06	0.000229489	4.84615	7.80589	1.60688	chr2R	11155889	11157801	1913	-	24	14	14	14	0.1106	0.0854	0.3256	0.35
Trpm	3_Junction_17139_Junction_17142*5_Junction_17138_Junction_17139	3_Junction_17139_Junction_17142	J002	0.0144282	20.2749	6.70763e-06	0.000166004	11.5733	10.0607	-0.59479	chr2R	11157262	11157801	540	-	193	150	29	26	0.8894	0.9146	0.6744	0.65
Trpm	3_Junction_17139_Junction_17142*5_Junction_17138_Junction_17139	5_Junction_17138_Junction_17139	J001	0.0466021	4.39045	0.0361408	0.158614	5.1157	3.63282	-1.06939	chr2R	11155889	11157036	1148	-	15	15	2	5	0.3846	0.5172	0.125	0.2632
Trpm	3_Junction_17139_Junction_17142*5_Junction_17138_Junction_17139	5_Junction_17138_Junction_17139	J002	0.0420547	4.51593	0.0335806	0.150894	5.66037	6.76547	0.599684	chr2R	11155889	11157801	1913	-	24	14	14	14	0.6154	0.4828	0.875	0.7368	0.220281
CG43729	3_Junction_17350_Junction_17351*5_Junction_17349_Junction_17350	3_Junction_17350_Junction_17351	J001	0.00973135	1.15506	0.282492	0.600285	12.2364	11.902	-0.126019	chr2R	11340513	11343938	3426	+	98	96	75	114	0.784	0.7442	0.7143	0.7125
CG43729	3_Junction_17350_Junction_17351*5_Junction_17349_Junction_17350	3_Junction_17350_Junction_17351	J002	0.0102814	1.13426	0.286869	0.60579	8.083	8.64277	0.249772	chr2R	11341302	11343938	2637	+	27	33	30	46	0.216	0.2558	0.2857	0.2875
CG43729	3_Junction_17350_Junction_17351*5_Junction_17349_Junction_17350	5_Junction_17349_Junction_17350	J001	0.0116924	9.91461	0.00163972	0.0157197	8.04689	9.6871	0.709732	chr2R	11340513	11341244	732	+	32	22	44	70	0.2462	0.1864	0.3697	0.3804
CG43729	3_Junction_17350_Junction_17351*5_Junction_17349_Junction_17350	5_Junction_17349_Junction_17350	J002	0.0112032	10.0799	0.00149897	0.0146495	12.62	11.5276	-0.411739	chr2R	11340513	11343938	3426	+	98	96	75	114	0.7538	0.8136	0.6303	0.6196	-0.130479
unc-104	3_Junction_18624_Junction_18625*5_Junction_18623_Junction_18624	3_Junction_18624_Junction_18625	J001	0.0514371	6.51985	0.0106677	0.0667718	16.1142	14.4658	-0.582406	chr2R	12641657	12643390	1734	-	178	188	283	224	0.8018	0.8952	0.7201	0.6707
unc-104	3_Junction_18624_Junction_18625*5_Junction_18623_Junction_18624	3_Junction_18624_Junction_18625	J002	0.0521581	6.44878	0.0111029	0.0687058	9.43864	11.2244	0.716566	chr2R	12641774	12643390	1617	-	44	22	110	110	0.1982	0.1048	0.2799	0.3293
unc-104	3_Junction_18624_Junction_18625*5_Junction_18623_Junction_18624	5_Junction_18623_Junction_18624	J001	0.0112159	11.4469	0.000716129	0.00809134	10.377	11.9605	0.61465	chr2R	12641657	12641746	90	-	53	38	141	110	0.2294	0.1681	0.3325	0.3293
unc-104	3_Junction_18624_Junction_18625*5_Junction_18623_Junction_18624	5_Junction_18623_Junction_18624	J002	0.0109418	11.5997	0.000659608	0.00758443	15.8368	14.7327	-0.39005	chr2R	12641657	12643390	1734	-	178	188	283	224	0.7706	0.8319	0.6675	0.6707	-0.185435
Cbp53E	3_Junction_18916_Junction_18917*5_Junction_18915_Junction_18916	3_Junction_18916_Junction_18917	J001	0.126969	8.78823	0.00303181	0.025686	22.3077	19.1526	-1.06897	chr2R	12874255	12881663	7409	+	810	988	976	413	0.8291	0.8366	0.6485	0.3755
Cbp53E	3_Junction_18916_Junction_18917*5_Junction_18915_Junction_18916	3_Junction_18916_Junction_18917	J002	0.127078	8.78081	0.00304416	0.0257669	15.5246	18.6544	1.08453	chr2R	12879167	12881663	2497	+	167	193	529	687	0.1709	0.1634	0.3515	0.6245
Cbp53E	3_Junction_18916_Junction_18917*5_Junction_18915_Junction_18916	5_Junction_18915_Junction_18916	J001	0.135983	12.7065	0.000364384	0.0047087	15.3618	19.3156	1.36769	chr2R	12874255	12879154	4900	+	140	173	664	903	0.1474	0.149	0.4049	0.6862
Cbp53E	3_Junction_18916_Junction_18917*5_Junction_18915_Junction_18916	5_Junction_18915_Junction_18916	J002	0.135876	12.7164	0.000362472	0.0046884	22.7265	18.7397	-1.35102	chr2R	12874255	12881663	7409	+	810	988	976	413	0.8526	0.851	0.5951	0.3138	-0.399339
CG9646	3_Junction_19024_Junction_19025*5_Junction_19023_Junction_19024	3_Junction_19024_Junction_19025	J001	0.0218578	26.4699	2.6768e-07	1.0101e-05	20.3397	22.7183	0.803471	chr2R	12938669	12940772	2104	+	647	443	2101	1289	0.5675	0.5551	0.8281	0.7641
CG9646	3_Junction_19024_Junction_19025*5_Junction_19023_Junction_19024	3_Junction_19024_Junction_19025	J002	0.0218981	26.4248	2.74006e-07	1.03034e-05	19.2823	16.8025	-0.852365	chr2R	12940649	12940772	124	+	493	355	436	398	0.4325	0.4449	0.1719	0.2359
CG9646	3_Junction_19024_Junction_19025*5_Junction_19023_Junction_19024	5_Junction_19023_Junction_19024	J001	0.0138709	8.45088	0.00364867	0.0295667	14.4615	13.1638	-0.469535	chr2R	12938669	12939325	657	+	116	108	234	167	0.152	0.196	0.1002	0.1147
CG9646	3_Junction_19024_Junction_19025*5_Junction_19023_Junction_19024	5_Junction_19023_Junction_19024	J002	0.0137278	8.5182	0.00351612	0.0287982	21.0297	22.0264	0.336598	chr2R	12938669	12940772	2104	+	647	443	2101	1289	0.848	0.804	0.8998	0.8853	0.224687
Hsf	3_Junction_19875_Junction_19876*5_Junction_19874_Junction_19875	3_Junction_19875_Junction_19876	J001	0.0263368	16.2009	5.69668e-05	0.00102619	17.0821	15.1221	-0.685624	chr2R	14018550	14018785	236	-	242	134	323	420	0.8996	0.8272	0.6701	0.6965
Hsf	3_Junction_19875_Junction_19876*5_Junction_19874_Junction_19875	3_Junction_19875_Junction_19876	J002	0.0267533	16.0184	6.27308e-05	0.00111249	9.64589	12.0405	0.942039	chr2R	14018694	14018785	92	-	27	28	159	183	0.1004	0.1728	0.3299	0.3035
Hsf	3_Junction_19875_Junction_19876*5_Junction_19874_Junction_19875	5_Junction_19874_Junction_19875	J001	0.0297196	8.80095	0.00301074	0.0255349	10.2357	12.1106	0.727904	chr2R	14018550	14018639	90	-	36	32	120	212	0.1295	0.1928	0.2709	0.3354
Hsf	3_Junction_19875_Junction_19876*5_Junction_19874_Junction_19875	5_Junction_19874_Junction_19875	J002	0.029394	8.87627	0.00288901	0.0246932	16.9017	15.298	-0.560911	chr2R	14018550	14018785	236	-	242	134	323	420	0.8705	0.8072	0.7291	0.6646	-0.216141
CG30118	3_Junction_20153_Junction_20154*5_Junction_20152_Junction_20153	3_Junction_20153_Junction_20154	J001	0.261039	11.326	0.000764312	0.00853987	3.27213	7.25943	2.56109	chr2R	14325117	14325711	595	-	5	1	15	49	0.0833	0.0123	0.3125	0.5833
CG30118	3_Junction_20153_Junction_20154*5_Junction_20152_Junction_20153	3_Junction_20153_Junction_20154	J002	0.251913	11.6472	0.000642997	0.00743591	11.9882	7.40269	-1.91638	chr2R	14325482	14325711	230	-	55	80	33	35	0.9167	0.9877	0.6875	0.4167
CG30118	3_Junction_20153_Junction_20154*5_Junction_20152_Junction_20153	5_Junction_20152_Junction_20153	J001	0.349541	7.60246	0.00582886	0.0422911	12.3384	7.94441	-1.79357	chr2R	14325117	14325443	327	-	70	65	58	33	0.9333	0.9848	0.7945	0.4024
CG30118	3_Junction_20153_Junction_20154*5_Junction_20152_Junction_20153	5_Junction_20152_Junction_20153	J002	0.359413	7.43139	0.00640958	0.04552	3.4373	6.94805	2.25831	chr2R	14325117	14325711	595	-	5	1	15	49	0.0667	0.0152	0.2055	0.5976	0.257501
bl	3_Junction_21735_Junction_21746*5_Junction_21734_Junction_21735	3_Junction_21735_Junction_21746	J001	0.121181	4.35143	0.036978	0.161353	10.5845	12.4304	0.708491	chr2R	16475249	16483060	7812	+	27	51	177	164	0.5192	0.7969	0.8762	0.8586
bl	3_Junction_21735_Junction_21746*5_Junction_21734_Junction_21735	3_Junction_21735_Junction_21746	J002	0.126009	4.21261	0.0401245	0.170813	8.00823	6.17035	-0.912129	chr2R	16477172	16483060	5889	+	25	13	25	27	0.4808	0.2031	0.1238	0.1414
bl	3_Junction_21735_Junction_21746*5_Junction_21734_Junction_21735	5_Junction_21734_Junction_21735	J001	0.192517	3.33401	0.0678611	0.245615	8.73349	6.92944	-0.839444	chr2R	16475249	16477120	1872	+	30	18	19	48	0.5263	0.2609	0.0969	0.2264
bl	3_Junction_21735_Junction_21746*5_Junction_21734_Junction_21735	5_Junction_21734_Junction_21735	J002	0.188624	3.3941	0.0654299	0.239616	10.5489	12.4742	0.738942	chr2R	16475249	16483060	7812	+	27	51	177	164	0.4737	0.7391	0.9031	0.7736	0.267939
RIC-3	3_Junction_22129_Junction_22132*5_Junction_22128_Junction_22129	3_Junction_22129_Junction_22132	J001	0.00864958	30.0001	4.32025e-08	1.99202e-06	13.4796	14.812	0.479178	chr2R	16911091	16911479	389	+	114	114	277	188	0.7355	0.75	0.9172	0.9126
RIC-3	3_Junction_22129_Junction_22132*5_Junction_22128_Junction_22129	3_Junction_22129_Junction_22132	J002	0.00933118	29.2872	6.2408e-08	2.77812e-06	9.50791	6.44137	-1.42003	chr2R	16911259	16911479	221	+	41	38	25	18	0.2645	0.25	0.0828	0.0874
RIC-3	3_Junction_22129_Junction_22132*5_Junction_22128_Junction_22129	5_Junction_22128_Junction_22129	J001	0.0263848	13.5361	0.000234014	0.00328047	10.1053	7.86458	-0.964363	chr2R	16911091	16911165	75	+	57	41	33	34	0.3333	0.2645	0.1065	0.1532
RIC-3	3_Junction_22129_Junction_22132*5_Junction_22128_Junction_22129	5_Junction_22128_Junction_22129	J002	0.0254672	13.8488	0.000198122	0.00286269	13.3227	14.9753	0.594392	chr2R	16911091	16911479	389	+	114	114	277	188	0.6667	0.7355	0.8935	0.8468	0.240895
PIP5K59B	3_Junction_23604_Junction_23605*5_Junction_23603_Junction_23604	3_Junction_23604_Junction_23605	J001	0.0702819	4.96301	0.0258951	0.126028	9.21383	11.0029	0.725022	chr2R	18767565	18767999	435	+	42	36	97	66	0.0832	0.1173	0.2795	0.1583
PIP5K59B	3_Junction_23604_Junction_23605*5_Junction_23603_Junction_23604	3_Junction_23604_Junction_23605	J002	0.0692437	5.02882	0.0249288	0.122837	17.9062	16.1919	-0.593889	chr2R	18767741	18767999	259	+	463	271	250	351	0.9168	0.8827	0.7205	0.8417
PIP5K59B	3_Junction_23604_Junction_23605*5_Junction_23603_Junction_23604	5_Junction_23603_Junction_23604	J001	0.00719089	81.8118	1.49685e-19	5.10149e-17	14.5351	11.8517	-0.984642	chr2R	18767565	18767654	90	+	252	190	88	60	0.8571	0.8407	0.4757	0.4762
PIP5K59B	3_Junction_23604_Junction_23605*5_Junction_23603_Junction_23604	5_Junction_23603_Junction_23604	J002	0.00741555	80.8721	2.40815e-19	8.03725e-17	8.15649	12.2204	1.65262	chr2R	18767565	18767999	435	+	42	36	97	66	0.1429	0.1593	0.5243	0.5238	0.116718
stmA	3_Junction_28744_Junction_28745*5_Junction_28743_Junction_28744	3_Junction_28744_Junction_28745	J001	0.0985912	12.9632	0.000317668	0.00420853	13.0815	10.012	-1.17916	chr2R	4619316	4619663	348	-	118	105	86	38	0.8252	0.7447	0.4943	0.2836
stmA	3_Junction_28744_Junction_28745*5_Junction_28743_Junction_28744	3_Junction_28744_Junction_28745	J002	0.0991283	12.9032	0.000328017	0.00431377	8.42671	11.4954	1.25651	chr2R	4619468	4619663	196	-	25	36	88	96	0.1748	0.2553	0.5057	0.7164
stmA	3_Junction_28744_Junction_28745*5_Junction_28743_Junction_28744	5_Junction_28743_Junction_28744	J001	0.107474	7.13542	0.0075576	0.0517393	6.41807	8.63424	1.05939	chr2R	4619316	4619425	110	-	13	22	35	38	0.0992	0.1732	0.2893	0.5
stmA	3_Junction_28744_Junction_28745*5_Junction_28743_Junction_28744	5_Junction_28743_Junction_28744	J002	0.104601	7.2895	0.00693586	0.0484405	12.6234	10.432	-0.840971	chr2R	4619316	4619663	348	-	118	105	86	38	0.9008	0.8268	0.7107	0.5	-0.384084
shrb	3_Junction_29302_Junction_29304*5_Junction_29301_Junction_29302	3_Junction_29302_Junction_29304	J001	0.0141157	14.7095	0.000125411	0.00197927	13.7765	15.2099	0.512451	chr2R	5030741	5031123	383	-	80	113	318	327	0.5031	0.6011	0.743	0.7348
shrb	3_Junction_29302_Junction_29304*5_Junction_29301_Junction_29302	3_Junction_29302_Junction_29304	J002	0.0143276	14.5763	0.000134599	0.00209473	12.8508	11.1331	-0.649331	chr2R	5030900	5031123	224	-	79	75	110	118	0.4969	0.3989	0.257	0.2652
shrb	3_Junction_29302_Junction_29304*5_Junction_29301_Junction_29302	5_Junction_29301_Junction_29302	J001	0.0168752	23.9593	9.83936e-07	3.10226e-05	12.8921	10.5612	-0.888993	chr2R	5030741	5030896	156	-	86	80	88	95	0.5181	0.4145	0.2167	0.2251
shrb	3_Junction_29302_Junction_29304*5_Junction_29301_Junction_29302	5_Junction_29301_Junction_29302	J002	0.0166167	24.2002	8.68237e-07	2.7838e-05	13.5239	15.4727	0.696852	chr2R	5030741	5031123	383	-	80	113	318	327	0.4819	0.5855	0.7833	0.7749	0.236831
CG1648	3_Junction_29971_Junction_29974*5_Junction_29970_Junction_29971	3_Junction_29971_Junction_29974	J001	0.1539	21.9071	2.86167e-06	7.85394e-05	18.4576	24.1558	1.92793	chr2R	5700169	5707343	7175	-	198	223	2437	5162	0.8285	0.8383	0.9783	0.994
CG1648	3_Junction_29971_Junction_29974*5_Junction_29970_Junction_29971	3_Junction_29971_Junction_29974	J002	0.156841	21.5228	3.49653e-06	9.37269e-05	11.911	6.67552	-2.2484	chr2R	5706513	5707343	831	-	41	43	54	31	0.1715	0.1617	0.0217	0.006
CG1648	3_Junction_29971_Junction_29974*5_Junction_29970_Junction_29971	5_Junction_29970_Junction_29971	J001	0.155499	23.2095	1.45279e-06	4.39548e-05	12.2182	6.72906	-2.33671	chr2R	5700169	5706500	6332	-	39	54	53	31	0.1646	0.1949	0.0213	0.006
CG1648	3_Junction_29971_Junction_29974*5_Junction_29970_Junction_29971	5_Junction_29970_Junction_29971	J002	0.152723	23.6052	1.18266e-06	3.68373e-05	18.3286	24.2875	2.01634	chr2R	5700169	5707343	7175	-	198	223	2437	5162	0.8354	0.8051	0.9787	0.994	0.268483
CG42336	3_Junction_31811_Junction_31816*5_Junction_31810_Junction_31811	3_Junction_31811_Junction_31816	J001	0.0104091	0.584431	0.444581	0.763395	15.4551	15.689	0.0823179	chr2R	7182290	7184765	2476	-	183	201	284	271	0.6559	0.7179	0.7082	0.7265
CG42336	3_Junction_31811_Junction_31816*5_Junction_31810_Junction_31811	3_Junction_31811_Junction_31816	J002	0.0105753	0.578944	0.446726	0.765182	12.2955	11.9856	-0.116525	chr2R	7183390	7184765	1376	-	96	79	117	102	0.3441	0.2821	0.2918	0.2735
CG42336	3_Junction_31811_Junction_31816*5_Junction_31810_Junction_31811	5_Junction_31810_Junction_31811	J001	0.0174421	7.2275	0.00717951	0.0497216	15.2299	14.0689	-0.413978	chr2R	7182290	7182997	708	-	224	184	191	144	0.5504	0.4779	0.4021	0.347
CG42336	3_Junction_31811_Junction_31816*5_Junction_31810_Junction_31811	5_Junction_31810_Junction_31811	J002	0.0174097	7.23797	0.00713776	0.049507	15.0172	16.1346	0.393236	chr2R	7182290	7184765	2476	-	183	201	284	271	0.4496	0.5221	0.5979	0.653	0.10345
CG41378	3_Junction_34807_Junction_34877*5_Junction_34803_Junction_34807	3_Junction_34807_Junction_34877	J001	0.0204871	40.1136	2.39617e-10	1.91974e-08	12.266	9.45777	-1.10498	chr2RHet	1545716	1621472	75757	-	87	75	52	65	0.8788	0.8523	0.5253	0.4333
CG41378	3_Junction_34807_Junction_34877*5_Junction_34803_Junction_34807	3_Junction_34807_Junction_34877	J002	0.021129	39.5282	3.23353e-10	2.50644e-08	6.0899	9.88978	1.76674	chr2RHet	1606048	1621472	15425	-	12	13	47	85	0.1212	0.1477	0.4747	0.5667
CG41378	3_Junction_34807_Junction_34877*5_Junction_34803_Junction_34807	5_Junction_34803_Junction_34807	J001	0.041492	2.12123	0.14527	0.402694	14.0402	14.9984	0.342364	chr2RHet	1545716	1605711	59996	-	146	174	123	268	0.6266	0.6988	0.7029	0.8048
CG41378	3_Junction_34807_Junction_34877*5_Junction_34803_Junction_34807	5_Junction_34803_Junction_34807	J002	0.0419822	2.10021	0.147279	0.406287	11.3542	10.3068	-0.411394	chr2RHet	1545716	1621472	75757	-	87	75	52	65	0.3734	0.3012	0.2971	0.1952	-0.125812
A2bp1	3_Junction_36065_Junction_36068*5_Junction_36064_Junction_36065	3_Junction_36065_Junction_36068	J001	0.312488	6.19308	0.012825	0.0763434	4.14333	7.22324	1.82144	chr3L	10569575	10573407	3833	+	7	9	10	28	0.0551	0.0938	0.2174	0.6667
A2bp1	3_Junction_36065_Junction_36068*5_Junction_36064_Junction_36065	3_Junction_36065_Junction_36068	J002	0.300662	6.40958	0.0113507	0.0698387	11.5785	7.99273	-1.48407	chr3L	10570424	10573407	2984	+	120	87	36	14	0.9449	0.9062	0.7826	0.3333
A2bp1	3_Junction_36065_Junction_36068*5_Junction_36064_Junction_36065	5_Junction_36064_Junction_36065	J001	0.372482	6.52518	0.0106358	0.0666053	11.8895	7.88237	-1.65317	chr3L	10569575	10570381	807	+	125	110	36	10	0.947	0.9244	0.7826	0.2632
A2bp1	3_Junction_36065_Junction_36068*5_Junction_36064_Junction_36065	5_Junction_36064_Junction_36065	J002	0.386163	6.31478	0.0119736	0.0726239	4.04558	7.37773	1.97026	chr3L	10569575	10573407	3833	+	7	9	10	28	0.053	0.0756	0.2174	0.7368	0.294473
CG5946	3_Junction_36886_Junction_36888*5_Junction_36884_Junction_36886	3_Junction_36886_Junction_36888	J001	0.0056988	114.474	1.02586e-26	6.95577e-24	19.2417	16.6661	-0.885905	chr3L	11810416	11811186	771	-	735	758	211	237	0.8429	0.8653	0.5567	0.5537
CG5946	3_Junction_36886_Junction_36888*5_Junction_36884_Junction_36886	3_Junction_36886_Junction_36888	J002	0.00577688	113.607	1.58878e-26	1.02339e-23	12.0182	15.7511	1.35211	chr3L	11810752	11811186	435	-	137	118	168	191	0.1571	0.1347	0.4433	0.4463
CG5946	3_Junction_36886_Junction_36888*5_Junction_36884_Junction_36886	5_Junction_36884_Junction_36886	J001	0.030533	69.6506	7.07986e-17	1.76078e-14	16.4215	21.0419	1.58225	chr3L	11810416	11810487	72	-	309	287	965	665	0.296	0.2746	0.8206	0.7373
CG5946	3_Junction_36886_Junction_36888*5_Junction_36884_Junction_36886	5_Junction_36884_Junction_36886	J002	0.0305378	69.6403	7.11694e-17	1.7632e-14	20.2987	15.6448	-1.60234	chr3L	11810416	11811186	771	-	735	758	211	237	0.704	0.7254	0.1794	0.2627	-0.450144
RhoGAP68F	3_Junction_37091_Junction_37093*5_Junction_37090_Junction_37091	3_Junction_37091_Junction_37093	J001	0.0118635	6.91395	0.00855258	0.0566368	11.0297	11.8536	0.316605	chr3L	12133228	12134350	1123	+	67	50	162	66	0.7053	0.7353	0.8394	0.8571
RhoGAP68F	3_Junction_37091_Junction_37093*5_Junction_37090_Junction_37091	3_Junction_37091_Junction_37093	J002	0.0130618	6.71647	0.00955267	0.0613363	7.82993	6.27868	-0.771423	chr3L	12134271	12134350	80	+	28	18	31	11	0.2947	0.2647	0.1606	0.1429
RhoGAP68F	3_Junction_37091_Junction_37093*5_Junction_37090_Junction_37091	5_Junction_37090_Junction_37091	J001	0.111961	0.428433	0.512759	0.813249	9.03912	8.31231	-0.317733	chr3L	12133228	12134238	1011	+	37	29	38	46	0.3558	0.3671	0.19	0.4107
RhoGAP68F	3_Junction_37091_Junction_37093*5_Junction_37090_Junction_37091	5_Junction_37090_Junction_37091	J002	0.110401	0.433787	0.510136	0.811645	11.0642	11.7942	0.280611	chr3L	12133228	12134350	1123	+	67	50	162	66	0.6442	0.6329	0.81	0.5893	0.107422
Mbs	3_Junction_39899_Junction_39901*5_Junction_39898_Junction_39899	3_Junction_39899_Junction_39901	J001	0.0163691	5.26602	0.0217457	0.11147	6.42845	7.72052	0.640667	chr3L	16059929	16063218	3290	+	25	11	42	13	0.2778	0.234	0.4118	0.4643
Mbs	3_Junction_39899_Junction_39901*5_Junction_39898_Junction_39899	3_Junction_39899_Junction_39901	J002	0.015358	5.36431	0.0205529	0.107207	9.65037	8.70748	-0.400053	chr3L	16062043	16063218	1176	+	65	36	60	15	0.7222	0.766	0.5882	0.5357
Mbs	3_Junction_39899_Junction_39901*5_Junction_39898_Junction_39899	5_Junction_39898_Junction_39899	J001	0.014236	19.7961	8.61563e-06	0.000205848	10.2589	8.46233	-0.755795	chr3L	16059929	16061211	1283	+	96	53	43	13	0.7934	0.8281	0.5059	0.5
Mbs	3_Junction_39899_Junction_39901*5_Junction_39898_Junction_39899	5_Junction_39898_Junction_39899	J002	0.0153352	19.3355	1.0965e-05	0.000253792	5.8596	8.40346	1.26272	chr3L	16059929	16063218	3290	+	25	11	42	13	0.2066	0.1719	0.4941	0.5	0.18116
CG7971	3_Junction_40460_Junction_40464*5_Junction_40459_Junction_40460	3_Junction_40460_Junction_40464	J001	0.0932474	5.5075	0.0189351	0.101269	20.2355	18.599	-0.557631	chr3L	1654726	1655252	527	-	905	722	675	171	0.9837	0.9783	0.9629	0.9048
CG7971	3_Junction_40460_Junction_40464*5_Junction_40459_Junction_40460	3_Junction_40460_Junction_40464	J002	0.0983018	5.29673	0.0213655	0.110002	5.72176	7.44264	0.898503	chr3L	1655151	1655252	102	-	15	16	26	18	0.0163	0.0217	0.0371	0.0952
CG7971	3_Junction_40460_Junction_40464*5_Junction_40459_Junction_40460	5_Junction_40459_Junction_40460	J001	0.274964	7.47952	0.00624048	0.0446093	4.80975	7.92408	1.68551	chr3L	1654726	1654805	80	-	8	8	27	40	0.0088	0.011	0.0385	0.1896
CG7971	3_Junction_40460_Junction_40464*5_Junction_40459_Junction_40460	5_Junction_40459_Junction_40460	J002	0.266618	7.6921	0.00554631	0.0406937	21.3967	17.4537	-1.34436	chr3L	1654726	1655252	527	-	905	722	675	171	0.9912	0.989	0.9615	0.8104	-0.134561
CG7971	3_Junction_40520_Junction_40528*5_Junction_40518_Junction_40520	3_Junction_40520_Junction_40528	J001	0.0222086	11.68	0.000631755	0.00733827	10.5624	8.88998	-0.690086	chr3L	1658590	1659844	1255	-	85	66	46	22	0.6489	0.66	0.4646	0.3333
CG7971	3_Junction_40520_Junction_40528*5_Junction_40518_Junction_40520	3_Junction_40520_Junction_40528	J002	0.0225056	11.6052	0.000657682	0.00756633	8.37246	10.1296	0.743625	chr3L	1659362	1659844	483	-	46	34	53	44	0.3511	0.34	0.5354	0.6667
CG7971	3_Junction_40520_Junction_40528*5_Junction_40518_Junction_40520	5_Junction_40518_Junction_40520	J001	0.15226	0.0988551	0.753208	0.945108	7.62145	7.92355	0.140752	chr3L	1658590	1658914	325	-	37	39	14	27	0.3033	0.3714	0.2333	0.551
CG7971	3_Junction_40520_Junction_40528*5_Junction_40518_Junction_40520	5_Junction_40518_Junction_40520	J002	0.149971	0.100196	0.751594	0.944633	9.85491	9.54669	-0.127138	chr3L	1658590	1659844	1255	-	85	66	46	22	0.6967	0.6286	0.7667	0.449	-0.168567
Nc73EF	3_Junction_40837_Junction_40838*5_Junction_40836_Junction_40837	3_Junction_40837_Junction_40838	J001	0.0646054	5.11924	0.0236619	0.118538	14.2983	12.7935	-0.54739	chr3L	16958078	16960480	2403	+	301	220	114	39	0.7798	0.7383	0.6552	0.4535
Nc73EF	3_Junction_40837_Junction_40838*5_Junction_40836_Junction_40837	3_Junction_40837_Junction_40838	J002	0.0653388	5.07309	0.0243	0.120767	9.90224	11.457	0.614683	chr3L	16959458	16960480	1023	+	85	78	60	47	0.2202	0.2617	0.3448	0.5465
Nc73EF	3_Junction_40837_Junction_40838*5_Junction_40836_Junction_40837	5_Junction_40836_Junction_40837	J001	0.0110247	33.0969	8.76789e-09	4.87793e-07	12.7112	14.8524	0.775644	chr3L	16958078	16959166	1089	+	189	131	186	92	0.3857	0.3732	0.62	0.7023
Nc73EF	3_Junction_40837_Junction_40838*5_Junction_40836_Junction_40837	5_Junction_40836_Junction_40837	J002	0.0109921	33.1526	8.52034e-09	4.75589e-07	14.6514	12.4775	-0.790961	chr3L	16958078	16960480	2403	+	301	220	114	39	0.6143	0.6268	0.38	0.2977	-0.250265
Rbp6	3_Junction_40936_Junction_40938*5_Junction_40935_Junction_40936	3_Junction_40936_Junction_40938	J001	0.00336052	39.1465	3.93166e-10	2.97595e-08	14.698	16.426	0.608333	chr3L	17058808	17060235	1428	-	195	186	324	235	0.2447	0.2562	0.399	0.4159
Rbp6	3_Junction_40936_Junction_40938*5_Junction_40935_Junction_40936	3_Junction_40936_Junction_40938	J002	0.00333824	39.2794	3.673e-10	2.80989e-08	19.257	18.0102	-0.426717	chr3L	17059940	17060235	296	-	602	540	488	330	0.7553	0.7438	0.601	0.5841
Rbp6	3_Junction_40936_Junction_40938*5_Junction_40935_Junction_40936	5_Junction_40935_Junction_40936	J001	0.100747	6.03597	0.0140172	0.081453	15.0235	12.873	-0.77658	chr3L	17058808	17059723	916	-	290	154	168	54	0.5979	0.4529	0.3415	0.1869
Rbp6	3_Junction_40936_Junction_40938*5_Junction_40935_Junction_40936	5_Junction_40935_Junction_40936	J002	0.100591	6.04472	0.013948	0.0811529	14.4865	16.6444	0.759837	chr3L	17058808	17060235	1428	-	195	186	324	235	0.4021	0.5471	0.6585	0.8131	0.15975
Pep	3_Junction_41343_Junction_41344*5_Junction_41342_Junction_41343	3_Junction_41343_Junction_41344	J001	0.0110306	4.90053	0.0268484	0.129399	10.3051	9.25512	-0.431659	chr3L	17633153	17636461	3309	-	62	62	34	51	0.3647	0.3647	0.2267	0.2881
Pep	3_Junction_41343_Junction_41344*5_Junction_41342_Junction_41343	3_Junction_41343_Junction_41344	J002	0.0107031	4.96287	0.0258972	0.126028	12.3818	13.1239	0.274684	chr3L	17634355	17636461	2107	-	108	108	116	126	0.6353	0.6353	0.7733	0.7119
Pep	3_Junction_41343_Junction_41344*5_Junction_41342_Junction_41343	5_Junction_41342_Junction_41343	J001	0.0599267	4.26571	0.0388889	0.167256	11.1046	12.4717	0.519771	chr3L	17633153	17634124	972	-	99	50	108	108	0.6149	0.4464	0.7606	0.6792
Pep	3_Junction_41343_Junction_41344*5_Junction_41342_Junction_41343	5_Junction_41342_Junction_41343	J002	0.0604941	4.23491	0.0396006	0.169232	10.5046	9.08365	-0.584108	chr3L	17633153	17636461	3309	-	62	62	34	51	0.3851	0.5536	0.2394	0.3208	-0.100786
CG42674	3_Junction_43292_Junction_43302*5_Junction_43288_Junction_43292	3_Junction_43292_Junction_43302	J001	0.0165435	16.7329	4.30283e-05	0.00081783	9.89977	11.8854	0.779059	chr3L	20162163	20178061	15899	-	18	18	268	273	0.5294	0.4286	0.7383	0.7822
CG42674	3_Junction_43292_Junction_43302*5_Junction_43288_Junction_43292	3_Junction_43292_Junction_43302	J002	0.0171432	16.5209	4.81156e-05	0.00089369	10.2895	7.85367	-1.04361	chr3L	20175769	20178061	2293	-	16	24	95	76	0.4706	0.5714	0.2617	0.2178
CG42674	3_Junction_43292_Junction_43302*5_Junction_43288_Junction_43292	5_Junction_43288_Junction_43292	J001	0.0154905	12.3997	0.000429406	0.00538128	11.5963	9.74454	-0.732719	chr3L	20162163	20175724	13562	-	32	24	172	138	0.64	0.5714	0.3909	0.3358
CG42674	3_Junction_43292_Junction_43302*5_Junction_43288_Junction_43292	5_Junction_43288_Junction_43292	J002	0.0153328	12.4495	0.000418114	0.00526641	9.98718	11.7911	0.707666	chr3L	20162163	20178061	15899	-	18	18	268	273	0.36	0.4286	0.6091	0.6642	0.258027
Dyrk2	3_Junction_4343_Junction_4348*5_Junction_4342_Junction_4343	3_Junction_4343_Junction_4348	J001	0.0152786	31.6522	1.84405e-08	9.41225e-07	4.24096	8.74576	2.44851	chr2L	14197867	14222015	24149	-	4	2	22	153	0.0488	0.0488	0.2895	0.3312
Dyrk2	3_Junction_4343_Junction_4348*5_Junction_4342_Junction_4343	3_Junction_4343_Junction_4348	J002	0.0145117	32.157	1.42201e-08	7.48343e-07	13.3939	11.3387	-0.769082	chr2L	14217069	14222015	4947	-	78	39	54	309	0.9512	0.9512	0.7105	0.6688
Dyrk2	3_Junction_4343_Junction_4348*5_Junction_4342_Junction_4343	5_Junction_4342_Junction_4343	J001	0.0128091	26.373	2.81452e-07	1.05363e-05	12.5628	10.6898	-0.716144	chr2L	14197867	14217025	19159	-	50	36	42	291	0.9259	0.9474	0.6562	0.6554
Dyrk2	3_Junction_4343_Junction_4348*5_Junction_4342_Junction_4343	5_Junction_4342_Junction_4343	J002	0.0134091	26.0814	3.27319e-07	1.19591e-05	4.41942	8.45066	2.19024	chr2L	14197867	14222015	24149	-	4	2	22	153	0.0741	0.0526	0.3438	0.3446	0.166675
CG10508	3_Junction_44272_Junction_44276*5_Junction_44271_Junction_44272	3_Junction_44272_Junction_44276	J001	0.215014	5.69515	0.0170118	0.093931	11.8304	9.11913	-1.08346	chr3L	21207476	21208471	996	+	137	72	64	12	0.3806	0.2236	0.1322	0.0355
CG10508	3_Junction_44272_Junction_44276*5_Junction_44271_Junction_44272	3_Junction_44272_Junction_44276	J002	0.213236	5.73871	0.016595	0.0921305	15.1667	18.0818	1.01453	chr3L	21208212	21208471	260	+	223	250	420	326	0.6194	0.7764	0.8678	0.9645
CG10508	3_Junction_44272_Junction_44276*5_Junction_44271_Junction_44272	5_Junction_44271_Junction_44272	J001	0.139652	4.46148	0.0346675	0.154047	11.2978	13.2967	0.749373	chr3L	21207476	21207710	235	+	77	117	157	54	0.3598	0.619	0.7104	0.8182
CG10508	3_Junction_44272_Junction_44276*5_Junction_44271_Junction_44272	5_Junction_44271_Junction_44272	J002	0.140147	4.4479	0.0349442	0.154935	11.4403	9.47721	-0.783685	chr3L	21207476	21208471	996	+	137	72	64	12	0.6402	0.381	0.2896	0.1818	-0.173527
Csp	3_Junction_45191_Junction_45192*5_Junction_45190_Junction_45191	3_Junction_45191_Junction_45192	J001	0.011038	12.2781	0.000458317	0.00568168	12.0258	13.0781	0.391521	chr3L	22263020	22264656	1637	+	86	69	172	134	0.7227	0.697	0.8731	0.8428
Csp	3_Junction_45191_Junction_45192*5_Junction_45190_Junction_45191	3_Junction_45191_Junction_45192	J002	0.0119122	11.9635	0.000542542	0.00650425	8.7958	6.81752	-0.922974	chr3L	22264076	22264656	581	+	33	30	25	25	0.2773	0.303	0.1269	0.1572
Csp	3_Junction_45191_Junction_45192*5_Junction_45190_Junction_45191	5_Junction_45190_Junction_45191	J001	0.0152685	0.398608	0.527809	0.823884	9.484	9.12923	-0.149383	chr3L	22263020	22264012	993	+	44	26	58	58	0.3385	0.2737	0.2522	0.3021
Csp	3_Junction_45191_Junction_45192*5_Junction_45190_Junction_45191	5_Junction_45190_Junction_45191	J002	0.0147273	0.407116	0.523437	0.820996	12.4202	12.6757	0.0950409	chr3L	22263020	22264656	1637	+	86	69	172	134	0.6615	0.7263	0.7478	0.6979	0.106207
CG17698	3_Junction_46134_Junction_46138*5_Junction_46133_Junction_46134	3_Junction_46134_Junction_46138	J001	0.0137274	11.6635	0.000637366	0.00739244	13.0398	14.0617	0.371609	chr3L	23739644	23740971	1328	+	48	60	276	444	0.8136	0.7895	0.9324	0.9117
CG17698	3_Junction_46134_Junction_46138*5_Junction_46133_Junction_46134	3_Junction_46134_Junction_46138	J002	0.0155047	11.2867	0.000780631	0.00869807	8.05337	5.79297	-1.14289	chr3L	23740912	23740971	60	+	11	16	20	43	0.1864	0.2105	0.0676	0.0883
CG17698	3_Junction_46134_Junction_46138*5_Junction_46133_Junction_46134	5_Junction_46133_Junction_46134	J001	0.0821062	2.20547	0.137522	0.388859	6.52734	5.4876	-0.578219	chr3L	23739644	23740857	1214	+	9	7	12	44	0.1579	0.1045	0.0417	0.0902
CG17698	3_Junction_46134_Junction_46138*5_Junction_46133_Junction_46134	5_Junction_46133_Junction_46134	J002	0.0770744	2.28085	0.13098	0.377375	13.114	14.0112	0.326183	chr3L	23739644	23740971	1328	+	48	60	276	444	0.8421	0.8955	0.9583	0.9098	0.151744
CG40045	3_Junction_46240_Junction_46242*5_Junction_46238_Junction_46240	3_Junction_46240_Junction_46242	J001	0.0195292	51.0339	9.07849e-13	1.16956e-10	18.7687	20.6024	0.623963	chr3L	24021823	24023853	2031	+	407	413	564	1275	0.9208	0.9429	0.993	0.9945
CG40045	3_Junction_46240_Junction_46242*5_Junction_46238_Junction_46240	3_Junction_46240_Junction_46242	J002	0.0226019	48.0503	4.15421e-12	4.83013e-10	8.57806	3.47047	-2.99126	chr3L	24022038	24023853	1816	+	35	25	4	7	0.0792	0.0571	0.007	0.0055
CG40045	3_Junction_46240_Junction_46242*5_Junction_46238_Junction_46240	5_Junction_46238_Junction_46240	J001	0.0499332	53.5315	2.54478e-13	3.60262e-11	10.4159	4.63261	-2.86601	chr3L	24021823	24021909	87	+	86	54	7	8	0.1744	0.1156	0.0123	0.0062
CG40045	3_Junction_46240_Junction_46242*5_Junction_46238_Junction_46240	5_Junction_46238_Junction_46240	J002	0.0482222	54.8842	1.27846e-13	1.90186e-11	17.4723	21.9227	1.51549	chr3L	24021823	24023853	2031	+	407	413	564	1275	0.8256	0.8844	0.9877	0.9938	0.179489
CG32264	3_Junction_47705_Junction_47708*5_Junction_47704_Junction_47705	3_Junction_47705_Junction_47708	J001	0.212791	5.90684	0.0150822	0.0860808	12.3231	9.53024	-1.09616	chr3L	3718990	3722154	3165	-	95	98	85	18	0.3105	0.3564	0.1631	0.0385
CG32264	3_Junction_47705_Junction_47708*5_Junction_47704_Junction_47705	3_Junction_47705_Junction_47708	J002	0.211141	5.94987	0.0147184	0.0844681	15.0682	18.0406	1.03526	chr3L	3721566	3722154	589	-	211	177	436	449	0.6895	0.6436	0.8369	0.9615
CG32264	3_Junction_47705_Junction_47708*5_Junction_47704_Junction_47705	5_Junction_47704_Junction_47705	J001	0.233355	5.81006	0.0159347	0.0895343	12.9447	16.0122	1.09831	chr3L	3718990	3721535	2546	-	119	105	258	294	0.5561	0.5172	0.7522	0.9423
CG32264	3_Junction_47705_Junction_47708*5_Junction_47704_Junction_47705	5_Junction_47704_Junction_47705	J002	0.234702	5.77886	0.0162201	0.0907418	12.3872	9.47207	-1.14437	chr3L	3718990	3722154	3165	-	95	98	85	18	0.4439	0.4828	0.2478	0.0577	-0.174328
CG15270	3_Junction_4824_Junction_4825*5_Junction_4823_Junction_4824	3_Junction_4824_Junction_4825	J001	0.0615431	4.0553	0.0440329	0.181952	8.01067	6.60903	-0.68039	chr2L	15092641	15093417	777	+	38	46	10	17	0.4471	0.6301	0.2778	0.3542
CG15270	3_Junction_4824_Junction_4825*5_Junction_4823_Junction_4824	3_Junction_4824_Junction_4825	J002	0.0611719	4.06976	0.0436574	0.180919	7.5575	8.90181	0.606261	chr2L	15093036	15093417	382	+	47	27	26	31	0.5529	0.3699	0.7222	0.6458
CG15270	3_Junction_4824_Junction_4825*5_Junction_4823_Junction_4824	5_Junction_4823_Junction_4824	J001	0.0571478	11.4041	0.000732805	0.00825081	5.4539	7.79198	1.22033	chr2L	15092641	15092897	257	+	20	10	17	29	0.3448	0.1786	0.6296	0.6304
CG15270	3_Junction_4824_Junction_4825*5_Junction_4823_Junction_4824	5_Junction_4823_Junction_4824	J002	0.0549556	11.6427	0.000644546	0.00744817	8.43259	6.24788	-1.06135	chr2L	15092641	15093417	777	+	38	46	10	17	0.6552	0.8214	0.3704	0.3696	-0.253332
sif	3_Junction_49141_Junction_49142*5_Junction_49140_Junction_49141	3_Junction_49141_Junction_49142	J001	0.156935	5.27527	0.0216304	0.111029	11.236	8.96579	-0.921296	chr3L	5668308	5669375	1068	+	135	93	42	14	0.8182	0.7266	0.6087	0.2917
sif	3_Junction_49141_Junction_49142*5_Junction_49140_Junction_49141	3_Junction_49141_Junction_49142	J002	0.159569	5.20189	0.0225624	0.114445	7.0816	9.30454	1.0081	chr3L	5669163	5669375	213	+	30	35	27	34	0.1818	0.2734	0.3913	0.7083
sif	3_Junction_49141_Junction_49142*5_Junction_49140_Junction_49141	5_Junction_49140_Junction_49141	J001	0.128922	16.5494	4.7398e-05	0.000884186	8.49067	12.4448	1.58706	chr3L	5668308	5669105	798	+	46	36	84	98	0.2541	0.2791	0.6667	0.875
sif	3_Junction_49141_Junction_49142*5_Junction_49140_Junction_49141	5_Junction_49140_Junction_49141	J002	0.128689	16.5754	4.67535e-05	0.000874189	12.1281	8.1941	-1.60095	chr3L	5668308	5669375	1068	+	135	93	42	14	0.7459	0.7209	0.3333	0.125	-0.418242
Dbp80	3_Junction_54587_Junction_54589*5_Junction_54586_Junction_54587	3_Junction_54587_Junction_54589	J001	0.129041	8.70358	0.00317585	0.026595	14.5697	17.5551	1.04541	chr3LHet	2423807	2454977	31171	+	186	159	304	475	0.8378	0.799	0.9297	0.9794
Dbp80	3_Junction_54587_Junction_54589*5_Junction_54586_Junction_54587	3_Junction_54587_Junction_54589	J002	0.133197	8.47425	0.00360209	0.0293146	8.9274	6.0869	-1.36518	chr3LHet	2446559	2454977	8419	+	36	40	23	10	0.1622	0.201	0.0703	0.0206
Dbp80	3_Junction_54587_Junction_54589*5_Junction_54586_Junction_54587	5_Junction_54586_Junction_54587	J001	0.0824643	5.19163	0.022696	0.114913	7.21297	5.28772	-1.0449	chr3LHet	2423807	2446277	22471	+	21	17	18	10	0.1014	0.0966	0.0559	0.0206
Dbp80	3_Junction_54587_Junction_54589*5_Junction_54586_Junction_54587	5_Junction_54586_Junction_54587	J002	0.0769931	5.44782	0.0195928	0.103683	15.2188	16.8881	0.58418	chr3LHet	2423807	2454977	31171	+	186	159	304	475	0.8986	0.9034	0.9441	0.9794	0.169606
Rbp	3_Junction_56065_Junction_56069*5_Junction_56064_Junction_56065	3_Junction_56065_Junction_56069	J001	0.126127	8.71529	0.00315553	0.026462	9.11251	11.9842	1.1445	chr3R	11214632	11216846	2215	+	64	51	130	12	0.7901	0.6711	0.9774	0.8571
Rbp	3_Junction_56065_Junction_56069*5_Junction_56064_Junction_56065	3_Junction_56065_Junction_56069	J002	0.137899	8.12838	0.00435778	0.0340368	6.11658	3.00674	-2.22722	chr3R	11215824	11216846	1023	+	17	25	3	2	0.2099	0.3289	0.0226	0.1429
Rbp	3_Junction_56065_Junction_56069*5_Junction_56064_Junction_56065	5_Junction_56064_Junction_56065	J001	0.350259	1.84817	0.173997	0.451146	7.4745	4.928	-1.39749	chr3R	11214632	11215742	1111	+	34	36	7	7	0.3469	0.4138	0.0511	0.3684
Rbp	3_Junction_56065_Junction_56069*5_Junction_56064_Junction_56065	5_Junction_56064_Junction_56065	J002	0.343105	1.88706	0.169533	0.444078	9.03252	12.0683	1.21037	chr3R	11214632	11216846	2215	+	64	51	130	12	0.6531	0.5862	0.9489	0.6316	0.244061
Rbp	3_Junction_56083_Junction_56084*5_Junction_56082_Junction_56083	3_Junction_56083_Junction_56084	J001	0.00981721	24.7133	6.65232e-07	2.19745e-05	10.6622	12.4777	0.695377	chr3R	11219220	11224833	5614	+	90	60	154	36	0.5028	0.4724	0.7476	0.7826
Rbp	3_Junction_56083_Junction_56084*5_Junction_56082_Junction_56083	3_Junction_56083_Junction_56084	J002	0.00999976	24.539	7.282e-07	2.37741e-05	10.8124	8.46601	-0.974061	chr3R	11222099	11224833	2735	+	89	67	52	10	0.4972	0.5276	0.2524	0.2174
Rbp	3_Junction_56083_Junction_56084*5_Junction_56082_Junction_56083	5_Junction_56082_Junction_56083	J001	0.00801983	18.9073	1.37224e-05	0.000306596	11.8503	10.0799	-0.692463	chr3R	11219220	11222030	2811	+	116	85	83	19	0.5631	0.5862	0.3502	0.3455
Rbp	3_Junction_56083_Junction_56084*5_Junction_56082_Junction_56083	5_Junction_56082_Junction_56083	J002	0.00799464	18.931	1.35535e-05	0.000303665	10.7537	12.386	0.625097	chr3R	11219220	11224833	5614	+	90	60	154	36	0.4369	0.4138	0.6498	0.6545	0.249307
CG31550	3_Junction_57328_Junction_57330*5_Junction_57326_Junction_57328	3_Junction_57328_Junction_57330	J001	0.0342918	24.6174	6.99186e-07	2.29665e-05	9.61469	6.8788	-1.23886	chr3R	1312606	1313555	950	+	46	23	31	29	0.902	0.7419	0.3827	0.4085
CG31550	3_Junction_57328_Junction_57330*5_Junction_57326_Junction_57328	3_Junction_57328_Junction_57330	J002	0.0353676	24.271	8.36884e-07	2.69132e-05	4.86334	8.17066	1.76278	chr3R	1312899	1313555	657	+	5	8	50	42	0.098	0.2581	0.6173	0.5915
CG31550	3_Junction_57328_Junction_57330*5_Junction_57326_Junction_57328	5_Junction_57326_Junction_57328	J001	0.0949048	2.37723	0.123115	0.362725	7.40898	8.66847	0.575838	chr3R	1312606	1312771	166	+	17	26	41	44	0.2698	0.5306	0.5694	0.6027
CG31550	3_Junction_57328_Junction_57330*5_Junction_57326_Junction_57328	5_Junction_57326_Junction_57328	J002	0.0948588	2.37812	0.123046	0.36259	8.81569	7.55803	-0.568799	chr3R	1312606	1313555	950	+	46	23	31	29	0.7302	0.4694	0.4306	0.3973	-0.286854
plx	3_Junction_60059_Junction_60060*5_Junction_60058_Junction_60059	3_Junction_60059_Junction_60060	J001	0.0540483	8.97346	0.00273929	0.0237131	5.40981	3.08887	-1.74126	chr3R	1533663	1534219	557	+	17	25	1	3	0.425	0.5814	0.0833	0.1765
plx	3_Junction_60059_Junction_60060*5_Junction_60058_Junction_60059	3_Junction_60059_Junction_60060	J002	0.0516151	9.10281	0.00255216	0.0224308	5.32261	7.07457	0.955578	chr3R	1533904	1534219	316	+	23	18	11	14	0.575	0.4186	0.9167	0.8235
plx	3_Junction_60059_Junction_60060*5_Junction_60058_Junction_60059	5_Junction_60058_Junction_60059	J001	0.104326	6.91209	0.00856147	0.0566763	6.53944	8.57347	0.968941	chr3R	1533663	1533741	79	+	33	31	32	10	0.66	0.5536	0.9697	0.7692
plx	3_Junction_60059_Junction_60060*5_Junction_60058_Junction_60059	5_Junction_60058_Junction_60059	J002	0.113853	6.57577	0.0103376	0.065168	5.47668	3.05522	-1.81419	chr3R	1533663	1534219	557	+	17	25	1	3	0.34	0.4464	0.0303	0.2308	-0.218438
LpR2	3_Junction_66411_Junction_66413*5_Junction_66410_Junction_66411	3_Junction_66411_Junction_66413	J001	0.0167158	60.0337	9.3248e-15	1.66384e-12	12.1041	14.0612	0.719364	chr3R	21527383	21532007	4625	-	68	69	143	303	0.7312	0.75	0.9931	0.9743
LpR2	3_Junction_66411_Junction_66413*5_Junction_66410_Junction_66411	3_Junction_66411_Junction_66413	J002	0.0203869	56.5235	5.55295e-14	8.76686e-12	8.36181	2.93128	-3.40461	chr3R	21531757	21532007	251	-	25	23	1	8	0.2688	0.25	0.0069	0.0257
LpR2	3_Junction_66411_Junction_66413*5_Junction_66410_Junction_66411	5_Junction_66410_Junction_66411	J001	0.0250946	67.317	2.31185e-16	5.47482e-14	8.69735	2.47668	-4.05453	chr3R	21527383	21531651	4269	-	23	33	2	4	0.2527	0.3235	0.0138	0.013
LpR2	3_Junction_66411_Junction_66413*5_Junction_66410_Junction_66411	5_Junction_66410_Junction_66411	J002	0.0214553	71.3447	2.99957e-17	7.85423e-15	11.8817	14.2982	0.888532	chr3R	21527383	21532007	4625	-	68	69	143	303	0.7473	0.6765	0.9862	0.987	0.401575
tau	3_Junction_68068_Junction_68069*5_Junction_68067_Junction_68068	3_Junction_68068_Junction_68069	J001	0.0161666	166.901	3.51549e-38	5.0779e-35	19.3377	14.2672	-1.76453	chr3R	23469695	23470945	1251	-	409	307	284	254	0.9512	0.9564	0.5081	0.4394
tau	3_Junction_68068_Junction_68069*5_Junction_68067_Junction_68068	3_Junction_68068_Junction_68069	J002	0.0162747	166.181	5.05031e-38	7.07197e-35	7.755	14.7137	2.74634	chr3R	23470144	23470945	802	-	21	14	275	324	0.0488	0.0436	0.4919	0.5606
tau	3_Junction_68068_Junction_68069*5_Junction_68067_Junction_68068	5_Junction_68067_Junction_68068	J001	0.0332855	109.562	1.22231e-25	7.1576e-23	6.93334	13.9762	2.87909	chr3R	23469695	23470125	431	-	14	10	230	321	0.0331	0.0315	0.4475	0.5583
tau	3_Junction_68068_Junction_68069*5_Junction_68067_Junction_68068	5_Junction_68067_Junction_68068	J002	0.0330928	110.032	9.64063e-26	5.74992e-23	19.7684	13.8582	-2.0584	chr3R	23469695	23470945	1251	-	409	307	284	254	0.9669	0.9685	0.5525	0.4417	-0.603089
unc80	3_Junction_68096_Junction_68097*5_Junction_68095_Junction_68096	3_Junction_68096_Junction_68097	J001	0.0210764	4.52717	0.0333607	0.150303	7.84837	8.95918	0.494662	chr3R	23489163	23490136	974	+	37	37	30	33	0.4157	0.3978	0.5085	0.6471
unc80	3_Junction_68096_Junction_68097*5_Junction_68095_Junction_68096	3_Junction_68096_Junction_68097	J002	0.0208373	4.54797	0.0329578	0.149083	9.08472	7.99599	-0.480397	chr3R	23489845	23490136	292	+	52	56	29	18	0.5843	0.6022	0.4915	0.3529
unc80	3_Junction_68096_Junction_68097*5_Junction_68095_Junction_68096	5_Junction_68095_Junction_68096	J001	0.0129898	5.43779	0.0197056	0.104119	8.04191	6.81737	-0.587865	chr3R	23489163	23489817	655	+	40	38	17	15	0.5195	0.5067	0.3617	0.3125
unc80	3_Junction_68096_Junction_68097*5_Junction_68095_Junction_68096	5_Junction_68095_Junction_68096	J002	0.0127581	5.46405	0.0194116	0.102988	7.87828	8.92395	0.465685	chr3R	23489163	23490136	974	+	37	37	30	33	0.4805	0.4933	0.6383	0.6875	0.162736
CG5514	3_Junction_68297_Junction_68299*5_Junction_68295_Junction_68297	3_Junction_68297_Junction_68299	J001	0.0236379	6.74625	0.00939451	0.0605199	5.80626	4.04227	-1.15382	chr3R	23767855	23768308	454	+	45	26	4	1	0.6164	0.65	0.3636	0.1429
CG5514	3_Junction_68297_Junction_68299*5_Junction_68295_Junction_68297	3_Junction_68297_Junction_68299	J002	0.025116	6.68867	0.00970274	0.0621265	4.58969	6.21299	0.98328	chr3R	23768205	23768308	104	+	28	14	7	6	0.3836	0.35	0.6364	0.8571
CG5514	3_Junction_68297_Junction_68299*5_Junction_68295_Junction_68297	5_Junction_68295_Junction_68297	J001	0.0631955	10.7771	0.00102763	0.0108301	9.16697	11.2445	0.838733	chr3R	23767855	23768155	301	+	81	90	57	21	0.6429	0.7759	0.9344	0.9545
CG5514	3_Junction_68297_Junction_68299*5_Junction_68295_Junction_68297	5_Junction_68295_Junction_68297	J002	0.0671507	10.4653	0.00121641	0.0123587	6.40751	3.62195	-1.82086	chr3R	23767855	23768308	454	+	45	26	4	1	0.3571	0.2241	0.0656	0.0455	-0.198835
Vha100-1	3_Junction_69765_Junction_69768*5_Junction_69764_Junction_69765	3_Junction_69765_Junction_69768	J001	0.0298182	66.7239	3.12318e-16	7.21064e-14	13.3713	7.94956	-2.17261	chr3R	24962421	24962796	376	+	311	260	15	13	0.3629	0.3088	0.0287	0.057
Vha100-1	3_Junction_69765_Junction_69768*5_Junction_69764_Junction_69765	3_Junction_69765_Junction_69768	J002	0.0295626	67.1431	2.52499e-16	5.91436e-14	16.1627	20.5549	1.50767	chr3R	24962632	24962796	165	+	546	582	507	215	0.6371	0.6912	0.9713	0.943
Vha100-1	3_Junction_69765_Junction_69768*5_Junction_69764_Junction_69765	5_Junction_69764_Junction_69765	J001	0.0159731	111.17	5.43171e-26	3.33217e-23	16.8386	20.8457	1.37083	chr3R	24962421	24962625	205	+	607	600	589	263	0.6612	0.6977	0.9752	0.9529
Vha100-1	3_Junction_69765_Junction_69768*5_Junction_69764_Junction_69765	5_Junction_69764_Junction_69765	J002	0.0161863	110.252	8.62864e-26	5.19444e-23	13.7618	7.64511	-2.45611	chr3R	24962421	24962796	376	+	311	260	15	13	0.3388	0.3023	0.0248	0.0471	-0.176379
Mgat2	3_Junction_70432_Junction_70435*5_Junction_70430_Junction_70432	3_Junction_70432_Junction_70435	J001	0.0238059	21.551	3.44541e-06	9.25104e-05	6.71057	9.56886	1.30538	chr3R	25842596	25843986	1391	-	23	27	44	32	0.073	0.1139	0.2651	0.3107
Mgat2	3_Junction_70432_Junction_70435*5_Junction_70430_Junction_70432	3_Junction_70432_Junction_70435	J002	0.0224004	22.2745	2.36329e-06	6.64466e-05	14.8737	13.0251	-0.667397	chr3R	25843706	25843986	281	-	292	210	122	71	0.927	0.8861	0.7349	0.6893
Mgat2	3_Junction_70432_Junction_70435*5_Junction_70430_Junction_70432	5_Junction_70430_Junction_70432	J001	0.0124922	11.4023	0.000733523	0.00825601	13.4616	12.4003	-0.391222	chr3R	25842596	25843345	750	-	162	139	102	89	0.8757	0.8373	0.6986	0.7355
Mgat2	3_Junction_70432_Junction_70435*5_Junction_70430_Junction_70432	5_Junction_70430_Junction_70432	J002	0.0134202	11.0807	0.000872323	0.00949633	7.14931	9.04301	0.863797	chr3R	25842596	25843986	1391	-	23	27	44	32	0.1243	0.1627	0.3014	0.2645	0.10541
CG1607	3_Junction_71378_Junction_71379*5_Junction_71377_Junction_71378	3_Junction_71378_Junction_71379	J001	0.0285293	37.1507	1.09345e-09	7.38979e-08	12.6442	15.9148	1.17531	chr3R	27215920	27216309	390	+	99	86	204	397	0.3852	0.4503	0.7528	0.8254
CG1607	3_Junction_71378_Junction_71379*5_Junction_71377_Junction_71378	3_Junction_71378_Junction_71379	J002	0.0287221	36.9529	1.2102e-09	8.08646e-08	14.0021	10.4881	-1.32257	chr3R	27216081	27216309	229	+	158	105	67	84	0.6148	0.5497	0.2472	0.1746
CG1607	3_Junction_71378_Junction_71379*5_Junction_71377_Junction_71378	5_Junction_71377_Junction_71378	J001	0.00700168	56.2486	6.38645e-14	1.00092e-11	12.604	9.35732	-1.27317	chr3R	27215920	27216018	99	+	79	80	44	82	0.4438	0.4819	0.1774	0.1712
CG1607	3_Junction_71378_Junction_71379*5_Junction_71377_Junction_71378	5_Junction_71377_Junction_71378	J002	0.00682358	56.8414	4.72421e-14	7.6267e-12	13.1884	15.3348	0.770708	chr3R	27215920	27216309	390	+	99	86	204	397	0.5562	0.5181	0.8226	0.8288	0.370392
CG17816	3_Junction_72611_Junction_72616*5_Junction_72610_Junction_72611	3_Junction_72611_Junction_72616	J001	0.319985	0.5908	0.44211	0.761452	9.31335	8.20079	-0.484155	chr3R	3691483	3695952	4470	-	52	32	18	51	0.4727	0.381	0.1208	0.505
CG17816	3_Junction_72611_Junction_72616*5_Junction_72610_Junction_72611	3_Junction_72611_Junction_72616	J002	0.317565	0.594957	0.440509	0.759907	10.3067	11.4904	0.463801	chr3R	3694094	3695952	1859	-	58	52	131	50	0.5273	0.619	0.8792	0.495
CG17816	3_Junction_72611_Junction_72616*5_Junction_72610_Junction_72611	5_Junction_72610_Junction_72611	J001	0.0762896	21.7572	3.09427e-06	8.41885e-05	4.94855	8.49012	1.85026	chr3R	3691483	3693759	2277	-	8	5	48	58	0.1333	0.1351	0.7273	0.5321
CG17816	3_Junction_72611_Junction_72616*5_Junction_72610_Junction_72611	5_Junction_72610_Junction_72611	J002	0.0753765	21.922	2.83964e-06	7.80345e-05	10.4833	7.17995	-1.44175	chr3R	3691483	3695952	4470	-	52	32	18	51	0.8667	0.8649	0.2727	0.4679	-0.194052
SpdS	3_Junction_74358_Junction_74359*5_Junction_74357_Junction_74358	3_Junction_74358_Junction_74359	J001	0.119455	0.86659	0.351901	0.676718	7.04933	6.02569	-0.535373	chr3R	5457576	5458097	522	+	16	22	17	18	0.4706	0.4231	0.4722	0.2093
SpdS	3_Junction_74358_Junction_74359*5_Junction_74357_Junction_74358	3_Junction_74358_Junction_74359	J002	0.116399	0.885774	0.346625	0.670899	7.76841	8.77311	0.451459	chr3R	5458022	5458097	76	+	18	30	19	68	0.5294	0.5769	0.5278	0.7907
SpdS	3_Junction_74358_Junction_74359*5_Junction_74357_Junction_74358	5_Junction_74357_Junction_74358	J001	0.0165114	5.23669	0.0221154	0.112781	7.42094	8.46774	0.481771	chr3R	5457576	5457827	252	+	18	23	35	50	0.5294	0.5111	0.6731	0.7353
SpdS	3_Junction_74358_Junction_74359*5_Junction_74357_Junction_74358	5_Junction_74357_Junction_74358	J002	0.0175059	5.14917	0.0232574	0.117067	7.19647	5.87406	-0.692594	chr3R	5457576	5458097	522	+	16	22	17	18	0.4706	0.4889	0.3269	0.2647	-0.114618
Mical	3_Junction_74846_Junction_74848*5_Junction_74845_Junction_74846	3_Junction_74846_Junction_74848	J001	0.118512	8.73942	0.00311403	0.0261898	5.00569	7.6984	1.4534	chr3R	5829372	5830376	1005	-	12	12	31	15	0.1111	0.2069	0.62	0.375
Mical	3_Junction_74846_Junction_74848*5_Junction_74845_Junction_74846	3_Junction_74846_Junction_74848	J002	0.113687	9.02287	0.00266623	0.0232147	10.1989	7.5927	-1.12927	chr3R	5830164	5830376	213	-	96	46	19	25	0.8889	0.7931	0.38	0.625
Mical	3_Junction_74846_Junction_74848*5_Junction_74845_Junction_74846	5_Junction_74845_Junction_74846	J001	0.226389	3.2276	0.0724068	0.256293	9.40588	7.42102	-0.885413	chr3R	5829372	5830130	759	-	55	41	13	35	0.8209	0.7736	0.2955	0.7
Mical	3_Junction_74846_Junction_74848*5_Junction_74845_Junction_74846	5_Junction_74845_Junction_74846	J002	0.231792	3.16363	0.0752957	0.263389	5.36016	7.23655	1.01232	chr3R	5829372	5830376	1005	-	12	12	31	15	0.1791	0.2264	0.7045	0.3	0.248616
CG43143	3_Junction_75155_Junction_75156*5_Junction_75153_Junction_75155	3_Junction_75155_Junction_75156	J001	0.0736143	10.2207	0.00138871	0.0137768	6.60573	4.05895	-1.5748	chr3R	6124313	6125354	1042	+	18	14	6	9	0.2687	0.3684	0.05	0.125
CG43143	3_Junction_75155_Junction_75156*5_Junction_75153_Junction_75155	3_Junction_75155_Junction_75156	J002	0.0664786	10.8314	0.000997957	0.0105832	9.12301	11.1	0.801401	chr3R	6124780	6125354	575	+	49	24	114	63	0.7313	0.6316	0.95	0.875
CG43143	3_Junction_75155_Junction_75156*5_Junction_75153_Junction_75155	5_Junction_75153_Junction_75155	J001	0.0517835	6.02073	0.0141388	0.0819874	8.8497	10.1872	0.557443	chr3R	6124313	6124722	410	+	43	34	79	40	0.7049	0.7083	0.9294	0.8163
CG43143	3_Junction_75155_Junction_75156*5_Junction_75153_Junction_75155	5_Junction_75153_Junction_75155	J002	0.058494	5.64501	0.0175052	0.0958743	6.20655	4.34487	-1.15174	chr3R	6124313	6125354	1042	+	18	14	6	9	0.2951	0.2917	0.0706	0.1837	-0.123786
hth	3_Junction_75412_Junction_75414*5_Junction_75411_Junction_75412	3_Junction_75412_Junction_75414	J001	0.0096936	3.28028	0.0701172	0.250598	10.2535	10.9119	0.26109	chr3R	6439522	6464344	24823	-	41	36	80	135	0.6308	0.6	0.7273	0.7181
hth	3_Junction_75412_Junction_75414*5_Junction_75411_Junction_75412	3_Junction_75412_Junction_75414	J002	0.0101744	3.23713	0.0719865	0.255113	8.62822	7.67111	-0.433762	chr3R	6444405	6464344	19940	-	24	24	30	53	0.3692	0.4	0.2727	0.2819
hth	3_Junction_75412_Junction_75414*5_Junction_75411_Junction_75412	5_Junction_75411_Junction_75412	J001	0.0333919	8.25329	0.00406783	0.0322413	8.22884	6.43457	-0.870644	chr3R	6439522	6444376	4855	-	28	19	12	37	0.4058	0.3455	0.1304	0.2151
hth	3_Junction_75412_Junction_75414*5_Junction_75411_Junction_75412	5_Junction_75411_Junction_75412	J002	0.0314569	8.49416	0.00356288	0.0291095	9.90901	11.2794	0.543518	chr3R	6439522	6464344	24823	-	41	36	80	135	0.5942	0.6545	0.8696	0.7849	0.179591
CG4848	3_Junction_76985_Junction_76986*5_Junction_76983_Junction_76985	3_Junction_76985_Junction_76986	J001	0.0607434	32.0179	1.52761e-08	7.99347e-07	8.96371	12.6236	1.44755	chr3R	8041675	8042601	927	-	58	50	110	58	0.4715	0.6329	0.9402	0.9667
CG4848	3_Junction_76985_Junction_76986*5_Junction_76983_Junction_76985	3_Junction_76985_Junction_76986	J002	0.0629508	31.3347	2.17165e-08	1.08438e-06	8.4467	3.94115	-2.5442	chr3R	8042408	8042601	194	-	65	29	7	2	0.5285	0.3671	0.0598	0.0333
CG4848	3_Junction_76985_Junction_76986*5_Junction_76983_Junction_76985	5_Junction_76983_Junction_76985	J001	0.031441	6.48709	0.0108661	0.067611	7.25764	5.47403	-0.954234	chr3R	8041675	8042353	679	-	29	16	14	12	0.3333	0.2424	0.1129	0.1714
CG4848	3_Junction_76985_Junction_76986*5_Junction_76983_Junction_76985	5_Junction_76983_Junction_76985	J002	0.0284609	6.82098	0.0090093	0.0587711	10.1563	11.3162	0.457338	chr3R	8041675	8042601	927	-	58	50	110	58	0.6667	0.7576	0.8871	0.8286	0.368678
sqd	3_Junction_77928_Junction_77931*5_Junction_77925_Junction_77928	3_Junction_77928_Junction_77931	J001	0.197001	3.40783	0.0648878	0.23831	11.6375	13.534	0.705479	chr3R	9462247	9468019	5773	-	31	50	305	275	0.1462	0.2283	0.2824	0.6044
sqd	3_Junction_77928_Junction_77931*5_Junction_77925_Junction_77928	3_Junction_77928_Junction_77931	J002	0.196539	3.41545	0.0645889	0.23744	17.445	15.481	-0.684331	chr3R	9462800	9468019	5220	-	181	169	775	180	0.8538	0.7717	0.7176	0.3956
sqd	3_Junction_77928_Junction_77931*5_Junction_77925_Junction_77928	5_Junction_77925_Junction_77928	J001	0.213635	7.13562	0.00755677	0.0517393	18.9535	15.7045	-1.12351	chr3R	9462247	9462691	445	-	314	274	707	155	0.9101	0.8457	0.6986	0.3605
sqd	3_Junction_77928_Junction_77931*5_Junction_77925_Junction_77928	5_Junction_77925_Junction_77928	J002	0.214185	7.118	0.00763137	0.0520859	11.0491	14.1623	1.15946	chr3R	9462247	9468019	5773	-	31	50	305	275	0.0899	0.1543	0.3014	0.6395	0.230571
CG11155	3_Junction_79277_Junction_79279*5_Junction_79276_Junction_79277	3_Junction_79277_Junction_79279	J001	0.100038	0.00568355	0.939905	0.995701	18.595	18.8235	0.0781576	chr4	1152584	1154499	1916	+	333	333	498	933	0.9123	0.9597	0.9188	0.9569
CG11155	3_Junction_79277_Junction_79279*5_Junction_79276_Junction_79277	3_Junction_79277_Junction_79279	J002	0.103015	0.00535988	0.941638	0.995971	8.21253	7.98436	-0.103702	chr4	1153199	1154499	1301	+	32	14	44	42	0.0877	0.0403	0.0812	0.0431
CG11155	3_Junction_79277_Junction_79279*5_Junction_79276_Junction_79277	5_Junction_79276_Junction_79277	J001	0.0171941	26.8238	2.22877e-07	8.60179e-06	14.1537	11.7843	-0.87362	chr4	1152584	1152709	126	+	144	134	55	152	0.3019	0.2869	0.0995	0.1401
CG11155	3_Junction_79277_Junction_79279*5_Junction_79276_Junction_79277	5_Junction_79276_Junction_79277	J002	0.0169999	27.0491	1.98352e-07	7.72935e-06	17.7582	19.6604	0.650797	chr4	1152584	1154499	1916	+	333	333	498	933	0.6981	0.7131	0.9005	0.8599	0.15775
Caps	3_Junction_79553_Junction_79557*5_Junction_79552_Junction_79553	3_Junction_79553_Junction_79557	J001	0.0189886	16.2251	5.62433e-05	0.0010168	10.0777	11.9177	0.718923	chr4	1254609	1259566	4958	+	28	34	118	212	0.4444	0.5574	0.7375	0.7823
Caps	3_Junction_79553_Junction_79557*5_Junction_79552_Junction_79553	3_Junction_79553_Junction_79557	J002	0.0197638	15.9182	6.61411e-05	0.00116056	10.0551	7.77472	-0.98573	chr4	1257938	1259566	1629	+	35	27	42	59	0.5556	0.4426	0.2625	0.2177
Caps	3_Junction_79553_Junction_79557*5_Junction_79552_Junction_79553	5_Junction_79552_Junction_79553	J001	0.0279998	17.4529	2.94508e-05	0.000592272	10.2454	7.61835	-1.13588	chr4	1254609	1257730	3122	+	24	44	41	50	0.4615	0.5641	0.2579	0.1908
Caps	3_Junction_79553_Junction_79557*5_Junction_79552_Junction_79553	5_Junction_79552_Junction_79553	J002	0.0271557	17.7696	2.49342e-05	0.000512479	9.88941	12.127	0.874512	chr4	1254609	1259566	4958	+	28	34	118	212	0.5385	0.4359	0.7421	0.8092	0.300926
PMCA	3_Junction_80499_Junction_80503*5_Junction_80498_Junction_80499	3_Junction_80499_Junction_80503	J001	0.0739144	2.28159	0.130918	0.377235	13.1592	11.7794	-0.514582	chr4	373216	374975	1760	-	103	87	116	122	0.5819	0.5179	0.4957	0.3073
PMCA	3_Junction_80499_Junction_80503*5_Junction_80498_Junction_80499	3_Junction_80499_Junction_80503	J002	0.073764	2.28583	0.13056	0.37662	12.3976	13.7724	0.505072	chr4	374604	374975	372	-	74	81	118	275	0.4181	0.4821	0.5043	0.6927
PMCA	3_Junction_80499_Junction_80503*5_Junction_80498_Junction_80499	5_Junction_80498_Junction_80499	J001	0.0333232	4.23668	0.0395595	0.16918	14.281	15.4951	0.431369	chr4	373216	374567	1352	-	132	122	215	382	0.5617	0.5837	0.6495	0.7579
PMCA	3_Junction_80499_Junction_80503*5_Junction_80498_Junction_80499	5_Junction_80498_Junction_80499	J002	0.0335279	4.21512	0.0400653	0.170641	13.1151	11.8218	-0.482334	chr4	373216	374975	1760	-	103	87	116	122	0.4383	0.4163	0.3505	0.2421	-0.109185
X11Lbeta	3_Junction_83795_Junction_83798*5_Junction_83790_Junction_83795	3_Junction_83795_Junction_83798	J001	0.0284696	21.6224	3.31945e-06	8.96139e-05	6.30821	2.34376	-3.07233	chrX	10524570	10571740	47171	+	31	15	2	1	0.1685	0.125	0.022	0.0091
X11Lbeta	3_Junction_83795_Junction_83798*5_Junction_83790_Junction_83795	3_Junction_83795_Junction_83798	J002	0.0228959	22.9959	1.62345e-06	4.83464e-05	12.0411	13.3516	0.485895	chrX	10525841	10571740	45900	+	153	105	89	109	0.8315	0.875	0.978	0.9909
X11Lbeta	3_Junction_83795_Junction_83798*5_Junction_83790_Junction_83795	5_Junction_83790_Junction_83795	J001	0.0564714	3.93399	0.0473194	0.191087	3.91801	5.32305	0.965891	chrX	10524570	10525420	851	+	16	14	3	6	0.3404	0.4828	0.6	0.8571
X11Lbeta	3_Junction_83795_Junction_83798*5_Junction_83790_Junction_83795	5_Junction_83790_Junction_83795	J002	0.0539138	3.98036	0.0460337	0.187565	4.74814	3.1931	-1.22281	chrX	10524570	10571740	47171	+	31	15	2	1	0.6596	0.5172	0.4	0.1429	-0.118522
dlg1	3_Junction_84432_Junction_84442*5_Junction_84431_Junction_84432	3_Junction_84432_Junction_84442	J001	0.0311415	5.47078	0.019337	0.102745	6.53532	7.66684	0.559361	chrX	11276013	11281803	5791	+	37	15	21	18	0.6167	0.4839	0.8077	0.7826
dlg1	3_Junction_84432_Junction_84442*5_Junction_84431_Junction_84432	3_Junction_84432_Junction_84442	J002	0.0339405	5.34459	0.0207867	0.107998	5.79651	4.23951	-1.00049	chrX	11277145	11281803	4659	+	23	16	5	5	0.3833	0.5161	0.1923	0.2174
dlg1	3_Junction_84432_Junction_84442*5_Junction_84431_Junction_84432	5_Junction_84431_Junction_84432	J001	0.133813	8.292	0.00398202	0.0316952	6.72445	4.2383	-1.5018	chrX	11276013	11276967	955	+	30	38	5	3	0.4478	0.717	0.1923	0.1429
dlg1	3_Junction_84432_Junction_84442*5_Junction_84431_Junction_84432	5_Junction_84431_Junction_84432	J002	0.133096	8.32011	0.00392086	0.0313348	5.91442	8.37221	1.21792	chrX	11276013	11281803	5791	+	37	15	21	18	0.5522	0.283	0.8077	0.8571	0.370612
CG8671	3_Junction_8733_Junction_8740*5_Junction_8732_Junction_8733	3_Junction_8733_Junction_8740	J001	0.0261545	55.4113	9.77716e-14	1.49963e-11	6.47755	10.9265	1.9727	chr2L	21275806	21281130	5325	+	10	13	122	100	0.1099	0.2281	0.7011	0.6803
CG8671	3_Junction_8733_Junction_8740*5_Junction_8732_Junction_8733	3_Junction_8733_Junction_8740	J002	0.0262249	55.331	1.0185e-13	1.5473e-11	12.0984	8.1431	-1.61283	chr2L	21280447	21281130	684	+	81	44	52	47	0.8901	0.7719	0.2989	0.3197
CG8671	3_Junction_8733_Junction_8740*5_Junction_8732_Junction_8733	5_Junction_8732_Junction_8733	J001	0.0943904	16.0125	6.29242e-05	0.00111443	11.1647	7.82237	-1.40326	chr2L	21275806	21279882	4077	+	39	42	35	70	0.7959	0.7636	0.2229	0.4118
CG8671	3_Junction_8733_Junction_8740*5_Junction_8732_Junction_8733	5_Junction_8732_Junction_8733	J002	0.0939575	16.0685	6.10934e-05	0.00108829	6.96856	10.3072	1.47598	chr2L	21275806	21281130	5325	+	10	13	122	100	0.2041	0.2364	0.7771	0.5882	0.418163
Rab3-GEF	3_Junction_90601_Junction_90605*5_Junction_90600_Junction_90601	3_Junction_90601_Junction_90605	J001	0.072817	24.9353	5.9287e-07	1.99213e-05	5.63002	9.10172	1.69824	chrX	14989246	14991487	2242	+	24	12	30	32	0.381	0.2264	0.8108	0.9143
Rab3-GEF	3_Junction_90601_Junction_90605*5_Junction_90600_Junction_90601	3_Junction_90601_Junction_90605	J002	0.0728817	24.923	5.96664e-07	2.00279e-05	7.92078	4.19242	-2.11533	chrX	14990928	14991487	560	+	39	41	7	3	0.619	0.7736	0.1892	0.0857
Rab3-GEF	3_Junction_90601_Junction_90605*5_Junction_90600_Junction_90601	5_Junction_90600_Junction_90601	J001	0.0490411	5.21175	0.0224347	0.114025	8.29378	6.87597	-0.672136	chrX	14989246	14990894	1649	+	31	33	25	18	0.5636	0.7333	0.4545	0.36
Rab3-GEF	3_Junction_90601_Junction_90605*5_Junction_90600_Junction_90601	5_Junction_90600_Junction_90601	J002	0.0495484	5.18382	0.0227982	0.115368	6.52869	7.98512	0.710499	chrX	14989246	14991487	2242	+	24	12	30	32	0.4364	0.2667	0.5455	0.64	0.346395
Rab3-GEF	3_Junction_90620_Junction_90622*5_Junction_90619_Junction_90620	3_Junction_90620_Junction_90622	J001	0.0685648	15.3472	8.94524e-05	0.00149274	10.8315	13.8148	1.11923	chrX	14997177	15003728	6552	+	93	38	223	103	0.337	0.1801	0.6246	0.6205
Rab3-GEF	3_Junction_90620_Junction_90622*5_Junction_90619_Junction_90620	3_Junction_90620_Junction_90622	J002	0.0684079	15.3777	8.80193e-05	0.00147111	14.8154	11.8519	-1.08446	chrX	15000482	15003728	3247	+	183	173	134	63	0.663	0.8199	0.3754	0.3795
Rab3-GEF	3_Junction_90620_Junction_90622*5_Junction_90619_Junction_90620	5_Junction_90619_Junction_90620	J001	0.0811257	14.1263	0.000170939	0.0025494	14.9893	11.8812	-1.13512	chrX	14997177	15000472	3296	+	187	190	129	66	0.6679	0.8333	0.3665	0.3905
Rab3-GEF	3_Junction_90620_Junction_90622*5_Junction_90619_Junction_90620	5_Junction_90619_Junction_90620	J002	0.0813217	14.096	0.000173712	0.0025806	10.7663	13.8826	1.16937	chrX	14997177	15003728	6552	+	93	38	223	103	0.3321	0.1667	0.6335	0.6095	0.303593
CG32809	3_Junction_91329_Junction_91443*5_Junction_91328_Junction_91329	3_Junction_91329_Junction_91443	J001	0.0124816	18.6185	1.59663e-05	0.000348629	7.30196	9.81051	1.1105	chrX	1571350	1575431	4082	-	48	48	23	29	0.0916	0.1168	0.25	0.2613
CG32809	3_Junction_91329_Junction_91443*5_Junction_91328_Junction_91329	3_Junction_91329_Junction_91443	J002	0.0116916	19.0809	1.25293e-05	0.000283877	15.1572	13.8426	-0.469897	chrX	1574141	1575431	1291	-	476	363	69	82	0.9084	0.8832	0.75	0.7387
CG32809	3_Junction_91329_Junction_91443*5_Junction_91328_Junction_91329	5_Junction_91328_Junction_91329	J001	0.0381221	15.4418	8.50842e-05	0.0014291	7.31712	4.41841	-1.66673	chrX	1571350	1574096	2747	-	58	35	4	4	0.5472	0.4217	0.1481	0.1212
CG32809	3_Junction_91329_Junction_91443*5_Junction_91328_Junction_91329	5_Junction_91328_Junction_91329	J002	0.0372106	15.5953	7.84496e-05	0.00133684	7.44812	9.64846	0.973376	chrX	1571350	1575431	4082	-	48	48	23	29	0.4528	0.5783	0.8519	0.8788	0.15083
Ranbp16	3_Junction_91745_Junction_91750*5_Junction_91743_Junction_91745	3_Junction_91745_Junction_91750	J001	0.0695478	27.8644	1.3012e-07	5.31485e-06	11.1258	15.1846	1.49397	chrX	15822963	15823372	410	-	68	131	187	123	0.2709	0.4081	0.8578	0.7736
Ranbp16	3_Junction_91745_Junction_91750*5_Junction_91743_Junction_91745	3_Junction_91745_Junction_91750	J002	0.0696086	27.8434	1.31539e-07	5.36604e-06	13.4693	9.37166	-1.5853	chrX	15823291	15823372	82	-	183	190	31	36	0.7291	0.5919	0.1422	0.2264
Ranbp16	3_Junction_91745_Junction_91750*5_Junction_91743_Junction_91745	5_Junction_91743_Junction_91745	J001	0.0582569	24.6306	6.94392e-07	2.28323e-05	12.9813	9.49163	-1.35649	chrX	15822963	15823204	242	-	155	149	50	26	0.6951	0.5321	0.211	0.1745
Ranbp16	3_Junction_91745_Junction_91750*5_Junction_91743_Junction_91745	5_Junction_91743_Junction_91745	J002	0.0581051	24.684	6.75431e-07	2.2243e-05	11.4355	14.8449	1.2539	chrX	15822963	15823372	410	-	68	131	187	123	0.3049	0.4679	0.789	0.8255	0.458207
Stim	3_Junction_91776_Junction_91779*5_Junction_91775_Junction_91776	3_Junction_91776_Junction_91779	J001	0.10365	5.57125	0.0182578	0.0987535	5.96871	7.94043	0.992089	chrX	15830467	15831622	1156	-	7	8	51	66	0.2333	0.2667	0.4397	0.6735
Stim	3_Junction_91776_Junction_91779*5_Junction_91775_Junction_91776	3_Junction_91776_Junction_91779	J002	0.103366	5.5816	0.0181502	0.0983119	9.28283	7.33217	-0.876482	chrX	15831064	15831622	559	-	23	22	65	32	0.7667	0.7333	0.5603	0.3265
Stim	3_Junction_91776_Junction_91779*5_Junction_91775_Junction_91776	5_Junction_91775_Junction_91776	J001	0.016096	37.1017	1.12124e-09	7.54688e-08	11.7047	9.29636	-0.960671	chrX	15830467	15830830	364	-	49	72	64	64	0.875	0.9	0.5565	0.4923
Stim	3_Junction_91776_Junction_91779*5_Junction_91775_Junction_91776	5_Junction_91775_Junction_91776	J002	0.0168377	36.5151	1.51484e-09	9.95686e-08	5.16016	8.9973	1.93676	chrX	15830467	15831622	1156	-	7	8	51	66	0.125	0.1	0.4435	0.5077	0.261851
Arp2	3_Junction_92895_Junction_92899*5_Junction_92894_Junction_92895	3_Junction_92895_Junction_92899	J001	0.0282441	3.1542	0.0757318	0.264315	9.35299	10.3895	0.42426	chrX	16444498	16446371	1874	-	41	32	104	50	0.4362	0.3951	0.6082	0.4854
Arp2	3_Junction_92895_Junction_92899*5_Junction_92894_Junction_92895	3_Junction_92895_Junction_92899	J002	0.0282418	3.15436	0.0757242	0.264308	10.5485	9.52313	-0.416431	chrX	16445522	16446371	850	-	53	49	67	53	0.5638	0.6049	0.3918	0.5146
Arp2	3_Junction_92895_Junction_92899*5_Junction_92894_Junction_92895	5_Junction_92894_Junction_92895	J001	0.0250866	12.8825	0.000331663	0.00435098	10.0889	8.10337	-0.848244	chrX	16444498	16445506	1009	-	43	57	49	21	0.5119	0.6404	0.3203	0.2958
Arp2	3_Junction_92895_Junction_92899*5_Junction_92894_Junction_92895	5_Junction_92894_Junction_92895	J002	0.0247841	12.9661	0.000317186	0.00420396	8.96152	10.8104	0.757242	chrX	16444498	16446371	1874	-	41	32	104	50	0.4881	0.3596	0.6797	0.7042	0.172399
Ucp4A	3_Junction_94398_Junction_94399*5_Junction_94397_Junction_94398	3_Junction_94398_Junction_94399	J001	0.0456717	27.096	1.93602e-07	7.55341e-06	10.4698	7.20195	-1.42557	chrX	17739791	17740962	1172	+	50	49	42	17	0.7576	0.7101	0.3281	0.1977
Ucp4A	3_Junction_94398_Junction_94399*5_Junction_94397_Junction_94398	3_Junction_94398_Junction_94399	J002	0.0453764	27.2041	1.83073e-07	7.16867e-06	7.14147	10.4061	1.42983	chrX	17740825	17740962	138	+	16	20	86	69	0.2424	0.2899	0.6719	0.8023
Ucp4A	3_Junction_94398_Junction_94399*5_Junction_94397_Junction_94398	5_Junction_94397_Junction_94398	J001	0.044194	7.93972	0.00483613	0.0367873	8.69235	10.3558	0.693521	chrX	17739791	17740714	924	+	39	36	65	56	0.4382	0.4235	0.6075	0.7671
Ucp4A	3_Junction_94398_Junction_94399*5_Junction_94397_Junction_94398	5_Junction_94397_Junction_94398	J002	0.0445734	7.89817	0.00494849	0.0373727	9.64158	7.91032	-0.753545	chrX	17739791	17740962	1172	+	50	49	42	17	0.5618	0.5765	0.3925	0.2329	-0.302761
CG7378	3_Junction_95638_Junction_95648*5_Junction_95637_Junction_95638	3_Junction_95638_Junction_95648	J001	0.157157	1.26537	0.260637	0.5741	14.4407	13.2532	-0.429388	chrX	18794993	18801530	6538	+	203	157	100	153	0.8788	0.929	0.7246	0.9
CG7378	3_Junction_95638_Junction_95648*5_Junction_95637_Junction_95638	3_Junction_95638_Junction_95648	J002	0.162093	1.23132	0.267151	0.582119	6.64719	7.74822	0.539392	chrX	18800167	18801530	1364	+	28	12	38	17	0.1212	0.071	0.2754	0.1
CG7378	3_Junction_95638_Junction_95648*5_Junction_95637_Junction_95638	5_Junction_95637_Junction_95638	J001	0.0865307	4.80502	0.028377	0.134323	7.05943	8.83775	0.819889	chrX	18794993	18800106	5114	+	28	15	50	32	0.1212	0.0872	0.3333	0.173
CG7378	3_Junction_95638_Junction_95648*5_Junction_95637_Junction_95638	5_Junction_95637_Junction_95638	J002	0.0841134	4.91616	0.0266067	0.128483	14.7018	12.9986	-0.615946	chrX	18794993	18801530	6538	+	203	157	100	153	0.8788	0.9128	0.6667	0.827	-0.173852
Ntf-2	3_Junction_98043_Junction_98044*5_Junction_98042_Junction_98043	3_Junction_98043_Junction_98044	J001	0.0232842	15.6844	7.48378e-05	0.00128412	15.7029	17.4812	0.61876	chrX	20907664	20909771	2108	+	242	188	443	377	0.6127	0.6573	0.7925	0.8491
Ntf-2	3_Junction_98043_Junction_98044*5_Junction_98042_Junction_98043	3_Junction_98043_Junction_98044	J002	0.0235487	15.5472	8.04727e-05	0.00136446	13.5076	11.4544	-0.765981	chrX	20909021	20909771	751	+	153	98	116	67	0.3873	0.3427	0.2075	0.1509
Ntf-2	3_Junction_98043_Junction_98044*5_Junction_98042_Junction_98043	5_Junction_98042_Junction_98043	J001	0.00810604	28.7954	8.04403e-08	3.48218e-06	10.2856	7.40586	-1.25312	chrX	20907664	20908635	972	+	57	42	35	25	0.1906	0.1826	0.0732	0.0622
Ntf-2	3_Junction_98043_Junction_98044*5_Junction_98042_Junction_98043	5_Junction_98042_Junction_98043	J002	0.00759764	29.4622	5.70181e-08	2.5612e-06	16.0154	17.1685	0.401152	chrX	20907664	20909771	2108	+	242	188	443	377	0.8094	0.8174	0.9268	0.9378	0.22053

## Sheet: AS A5SS events
Gene	AS_event_ID	AS_structure_ID	sub_junction_ID	sub-junction_dispersion_estimate	LRT_statistic-full_vs_reduced	LRT_p_value-full_vs_reduced	BH_adjusted_p-values	DN1	LNv	fitting_parameter_log2fold_change_LNv_DN1	sub_junction_chr	sub_junction_start_coor	sub_junction_end_coor	sub_junction_size	sub_junction_strand	raw_count.DN1_A	raw_count.DN1_B	raw_count.LNv_A	raw_count.LNv_B	percentage_usage.DN1_A	percentage_usage.DN1_B	percentage_usage.LNv_A	percentage_usage.LNv_B	deltaPSI
lilli	3_Junction_10072_Junction_10108_Junction_10115	3_Junction_10072_Junction_10108_Junction_10115	J001	0.00649681	12.0379	0.00052131	0.00630248	9.32428	10.994	0.674976	chr2L	2788240	2935924	147685	+	41	35	54	117	0.199	0.1955	0.3273	0.325	-0.1289
lilli	3_Junction_10072_Junction_10108_Junction_10115	3_Junction_10072_Junction_10108_Junction_10115	J002	0.0178909	4.50932	0.0337106	0.151246	7.93566	6.15463	-0.887402	chr2L	2814254	2935924	121671	+	31	19	13	25	0.1505	0.1061	0.0788	0.0694	0.0542
lilli	3_Junction_10072_Junction_10108_Junction_10115	3_Junction_10072_Junction_10108_Junction_10115	J003	0.00764492	2.78175	0.0953437	0.306935	13.9271	13.3569	-0.20691	chr2L	2817986	2935924	117939	+	134	125	98	218	0.6505	0.6983	0.5939	0.6056	0.07465
kirre	3_Junction_101574_Junction_101731_Junction_101792	3_Junction_101574_Junction_101731_Junction_101792	J001	0.698351	0.432353	0.510836	0.812119	12.3696	8.43698	-1.5828	chrX	2916003	3041056	125054	+	159	185	14	27	0.8196	0.1719	0.1667	0.4154	0.2047
kirre	3_Junction_101574_Junction_101731_Junction_101792	3_Junction_101574_Junction_101731_Junction_101792	J002	0.279534	9.92211	0.00163305	0.0156698	5.93292	10.036	1.91339	chrX	2992996	3041056	48061	+	16	32	51	16	0.0825	0.0297	0.6071	0.2462	-0.37055
kirre	3_Junction_101574_Junction_101731_Junction_101792	3_Junction_101574_Junction_101731_Junction_101792	J003	0.775867	0.12674	0.721837	0.935127	16.3902	8.41615	-3.03573	chrX	3017233	3041056	23824	+	19	859	19	22	0.0979	0.7983	0.2262	0.3385	0.16575
dnc	3_Junction_102116_Junction_102200	3_Junction_102116_Junction_102200	J001	0.136205	6.04982	0.0139077	0.0809797	8.4036	6.02312	-1.17129	chrX	3140718	3215072	74355	+	60	32	10	13	0.6897	0.7111	0.2	0.52	0.3404
dnc	3_Junction_102116_Junction_102200	3_Junction_102116_Junction_102200	J002	0.137966	5.98821	0.0144018	0.0831403	5.96781	8.3705	1.18728	chrX	3185910	3215072	29163	+	27	13	40	12	0.3103	0.2889	0.8	0.48	-0.3404
Trim9	3_Junction_1021_Junction_1022_Junction_1079	3_Junction_1021_Junction_1022_Junction_1079	J001	0.0922826	0.964177	0.326137	0.650033	16.9246	15.7378	-0.414005	chr2L	10559848	10865165	305318	+	317	682	168	133	0.3598	0.5814	0.6	0.5565	-0.10765
Trim9	3_Junction_1021_Junction_1022_Junction_1079	3_Junction_1021_Junction_1022_Junction_1079	J002	0.444898	3.2762	0.0702915	0.250984	16.3009	10.3571	-2.18891	chr2L	10559850	10865165	305316	+	509	383	10	64	0.5778	0.3265	0.0357	0.2678	0.3004
Trim9	3_Junction_1021_Junction_1022_Junction_1079	3_Junction_1021_Junction_1022_Junction_1079	J003	0.110878	8.4539	0.00364261	0.0295361	9.82075	12.7486	1.13454	chr2L	10691226	10865165	173940	+	55	108	102	42	0.0624	0.0921	0.3643	0.1757	-0.19275
Mnt	3_Junction_102808_Junction_102816	3_Junction_102808_Junction_102816	J001	0.0273771	17.6745	2.62116e-05	0.000535318	7.76751	10.3315	1.10051	chrX	3577482	3586984	9503	+	31	35	25	76	0.3196	0.2397	0.5319	0.6333	-0.30295
Mnt	3_Junction_102808_Junction_102816	3_Junction_102808_Junction_102816	J002	0.026858	17.8798	2.35306e-05	0.000486738	11.1972	8.84029	-0.960364	chrX	3582528	3586984	4457	+	66	111	22	44	0.6804	0.7603	0.4681	0.3667	0.30295
Plc21C	3_Junction_10392_Junction_10414	3_Junction_10392_Junction_10414	J001	0.0867243	16.4024	5.12191e-05	0.000941561	9.59215	6.02522	-1.67989	chr2L	306389	317741	11353	+	62	72	11	11	0.521	0.6372	0.2391	0.1009	0.4091
Plc21C	3_Junction_10392_Junction_10414	3_Junction_10392_Junction_10414	J002	0.0859117	16.5227	4.80708e-05	0.000893138	8.48644	11.956	1.40541	chr2L	310605	317741	7137	+	57	41	35	98	0.479	0.3628	0.7609	0.8991	-0.4091
bi	3_Junction_103956_Junction_103988_Junction_103989	3_Junction_103956_Junction_103988_Junction_103989	J001	0.0351413	9.20837	0.00240911	0.0213979	7.28973	4.30751	-1.73291	chrX	4307932	4322229	14298	+	9	2	21	42	0.3913	0.1667	0.075	0.1034	0.1898
bi	3_Junction_103956_Junction_103988_Junction_103989	3_Junction_103956_Junction_103988_Junction_103989	J002	0.0105898	25.4454	4.55091e-07	1.58199e-05	7.57098	10.4182	1.22748	chrX	4321385	4322229	845	+	7	5	223	316	0.3043	0.4167	0.7964	0.7783	-0.42685
bi	3_Junction_103956_Junction_103988_Junction_103989	3_Junction_103956_Junction_103988_Junction_103989	J003	0.0133628	9.32987	0.00225448	0.0202673	7.57067	4.90556	-1.45776	chrX	4321572	4322229	658	+	7	5	36	48	0.3043	0.4167	0.1286	0.1182	0.2371
rg	3_Junction_105203_Junction_105205	3_Junction_105203_Junction_105205	J001	0.118467	5.3887	0.0202675	0.10607	5.17264	3.28379	-1.41176	chrX	5132300	5137408	5109	+	13	16	5	1	0.3023	0.5161	0.1852	0.0476	0.2928
rg	3_Junction_105203_Junction_105205	3_Junction_105203_Junction_105205	J002	0.106882	5.66081	0.0173481	0.0951919	6.21139	7.81192	0.79936	chrX	5134415	5137408	2994	+	30	15	22	20	0.6977	0.4839	0.8148	0.9524	-0.2928
SK	3_Junction_105390_Junction_105453	3_Junction_105390_Junction_105453	J001	0.0195376	14.6333	0.000130587	0.00204463	8.8186	6.654	-1.01648	chrX	5247037	5270079	23043	+	44	33	21	18	0.5432	0.5323	0.2165	0.3158	0.2716
SK	3_Junction_105390_Junction_105453	3_Junction_105390_Junction_105453	J002	0.0189083	14.8369	0.000117219	0.00186849	8.31611	10.1055	0.75906	chrX	5259946	5270079	10134	+	37	29	76	39	0.4568	0.4677	0.7835	0.6842	-0.2716
skpA	3_Junction_105673_Junction_105675_Junction_105678_Junction_105679	3_Junction_105673_Junction_105675_Junction_105678_Junction_105679	J001	0.00713487	72.7381	1.48049e-17	4.00691e-15	7.87365	12.7588	1.98254	chrX	550432	551130	699	+	19	13	213	204	0.0295	0.0244	0.1413	0.128	-0.1077
skpA	3_Junction_105673_Junction_105675_Junction_105678_Junction_105679	3_Junction_105673_Junction_105675_Junction_105678_Junction_105679	J002	0.00817611	19.2129	1.16919e-05	0.000267255	20.5445	18.609	-0.658982	chrX	550522	551130	609	+	470	367	819	922	0.7287	0.6886	0.5435	0.5784	0.1477
skpA	3_Junction_105673_Junction_105675_Junction_105678_Junction_105679	3_Junction_105673_Junction_105675_Junction_105678_Junction_105679	J003	0.00900763	2.14563	0.142976	0.398601	16.0998	15.8587	-0.0844258	chrX	550637	551130	494	+	146	143	460	442	0.2264	0.2683	0.3052	0.2773	-0.0439
skpA	3_Junction_105673_Junction_105675_Junction_105678_Junction_105679	3_Junction_105673_Junction_105675_Junction_105678_Junction_105679	J004	0.0273665	0.544029	0.460768	0.77666	6.4986	5.28612	-0.684666	chrX	550653	551130	478	+	10	10	15	26	0.0155	0.0188	0.01	0.0163	0.004
pigs	3_Junction_106826_Junction_106847	3_Junction_106826_Junction_106847	J001	0.0414708	19.3747	1.07422e-05	0.00024926	8.4699	10.7906	0.963772	chrX	6514289	6557863	43575	+	20	21	110	122	0.5128	0.5833	0.8462	0.9173	-0.3337
pigs	3_Junction_106826_Junction_106847	3_Junction_106826_Junction_106847	J002	0.0452515	18.5573	1.64874e-05	0.000358064	7.8576	4.78651	-1.6702	chrX	6526204	6557863	31660	+	19	15	20	11	0.4872	0.4167	0.1538	0.0827	0.3337
ct	3_Junction_108146_Junction_108148_Junction_108150_Junction_108151_Junction_108155	3_Junction_108146_Junction_108148_Junction_108150_Junction_108151_Junction_108155	J001	0.00999361	4.89303	0.0269653	0.129776	10.3747	11.2875	0.358503	chrX	7455369	7513067	57699	+	62	113	38	69	0.31	0.3393	0.4	0.4662	-0.10845
ct	3_Junction_108146_Junction_108148_Junction_108150_Junction_108151_Junction_108155	3_Junction_108146_Junction_108148_Junction_108150_Junction_108151_Junction_108155	J002	0.0301626	9.6501	0.00189341	0.0176246	11.3271	9.04582	-0.922224	chrX	7455372	7513067	57696	+	99	128	20	37	0.495	0.3844	0.2105	0.25	0.20945
ct	3_Junction_108146_Junction_108148_Junction_108150_Junction_108151_Junction_108155	3_Junction_108146_Junction_108148_Junction_108150_Junction_108151_Junction_108155	J003	0.0477886	0.0157319	0.900186	0.98957	7.2921	6.82548	-0.231258	chrX	7455375	7513067	57693	+	17	51	10	18	0.085	0.1532	0.1053	0.1216	0.00565
ct	3_Junction_108146_Junction_108148_Junction_108150_Junction_108151_Junction_108155	3_Junction_108146_Junction_108148_Junction_108150_Junction_108151_Junction_108155	J004	0.0264505	1.81676	0.177699	0.456939	5.91848	4.51944	-0.869517	chrX	7455378	7513067	57690	+	12	30	5	6	0.06	0.0901	0.0526	0.0405	0.0285
ct	3_Junction_108146_Junction_108148_Junction_108150_Junction_108151_Junction_108155	3_Junction_108146_Junction_108148_Junction_108150_Junction_108151_Junction_108155	J005	0.0687334	11.4688	0.000707734	0.00802888	4.31565	7.87635	2.00463	chrX	7471375	7513067	41693	+	10	11	22	18	0.05	0.033	0.2316	0.1216	-0.1351
Reph	3_Junction_10898_Junction_10902	3_Junction_10898_Junction_10902	J001	0.0470025	29.8549	4.65616e-08	2.1271e-06	9.3863	5.59087	-1.84135	chr2L	3803730	3806967	3238	+	30	26	14	28	0.566	0.5652	0.0881	0.1667	0.4382
Reph	3_Junction_10898_Junction_10902	3_Junction_10898_Junction_10902	J002	0.0440665	31.0126	2.56362e-08	1.26263e-06	8.50037	11.6821	1.29529	chr2L	3806821	3806967	147	+	23	20	145	140	0.434	0.4348	0.9119	0.8333	-0.4382
Kr-h1	3_Junction_12728_Junction_12730	3_Junction_12728_Junction_12730	J001	0.0946484	6.75549	0.00934597	0.0602976	11.7875	10.1871	-0.625316	chr2L	6083740	6092993	9254	+	72	67	35	111	0.96	0.9571	0.7292	0.881	0.15345
Kr-h1	3_Junction_12728_Junction_12730	3_Junction_12728_Junction_12730	J002	0.106733	6.34811	0.0117507	0.0717414	3.20313	5.21019	1.51016	chr2L	6092244	6092993	750	+	3	3	13	15	0.04	0.0429	0.2708	0.119	-0.15345
stai	3_Junction_12756_Junction_12757	3_Junction_12756_Junction_12757	J001	0.0111917	13.8942	0.000193398	0.00280655	18.3156	17.22	-0.37722	chr2L	6122410	6122976	567	+	316	321	409	552	0.9003	0.8606	0.7688	0.7863	0.1029
stai	3_Junction_12756_Junction_12757	3_Junction_12756_Junction_12757	J002	0.0115109	13.675	0.000217329	0.00309234	10.3969	12.1381	0.673655	chr2L	6122853	6122976	124	+	35	52	123	150	0.0997	0.1394	0.2312	0.2137	-0.1029
Bsg	3_Junction_14199_Junction_14203_Junction_14208_Junction_14211_Junction_14231	3_Junction_14199_Junction_14203_Junction_14208_Junction_14211_Junction_14231	J001	0.0373452	0.498776	0.480038	0.791005	6.56476	5.7871	-0.423362	chr2L	8083457	8089183	5727	+	22	15	10	18	0.053	0.0421	0.0254	0.0501	0.0098
Bsg	3_Junction_14199_Junction_14203_Junction_14208_Junction_14211_Junction_14231	3_Junction_14199_Junction_14203_Junction_14208_Junction_14211_Junction_14231	J002	0.0144435	5.91785	0.0149882	0.085658	15.9307	14.9256	-0.35439	chr2L	8083521	8089183	5663	+	269	231	193	206	0.6482	0.6489	0.4898	0.5738	0.11675
Bsg	3_Junction_14199_Junction_14203_Junction_14208_Junction_14211_Junction_14231	3_Junction_14199_Junction_14203_Junction_14208_Junction_14211_Junction_14231	J003	0.0258967	2.61337	0.105966	0.329712	5.82629	7.1278	0.685936	chr2L	8083587	8089183	5597	+	17	11	29	17	0.041	0.0309	0.0736	0.0474	-0.02455
Bsg	3_Junction_14199_Junction_14203_Junction_14208_Junction_14211_Junction_14231	3_Junction_14199_Junction_14203_Junction_14208_Junction_14211_Junction_14231	J004	0.0315326	2.50295	0.113633	0.345263	11.7497	12.8423	0.409264	chr2L	8083636	8089183	5548	+	87	87	144	94	0.2096	0.2444	0.3655	0.2618	-0.08665
Bsg	3_Junction_14199_Junction_14203_Junction_14208_Junction_14211_Junction_14231	3_Junction_14199_Junction_14203_Junction_14208_Junction_14211_Junction_14231	J005	0.0229748	0.981839	0.321745	0.645685	6.17104	6.87605	0.368955	chr2L	8088453	8089183	731	+	20	12	18	24	0.0482	0.0337	0.0457	0.0669	-0.01535
PNUTS	3_Junction_14946_Junction_14955	3_Junction_14946_Junction_14955	J001	0.0274163	5.08984	0.0240664	0.119944	9.10867	10.4986	0.571033	chr2L	870552	871339	788	+	25	25	50	161	0.3906	0.4098	0.5102	0.6265	-0.16815
PNUTS	3_Junction_14946_Junction_14955	3_Junction_14946_Junction_14955	J002	0.0275608	5.07331	0.024297	0.120761	10.5301	9.13895	-0.570702	chr2L	871274	871339	66	+	39	36	48	96	0.6094	0.5902	0.4898	0.3735	0.16815
Ggamma30A	3_Junction_15213_Junction_15216	3_Junction_15213_Junction_15216	J001	0.00990155	12.4581	0.000416183	0.00524825	12.3346	13.6159	0.471879	chr2L	9256696	9272464	15769	+	140	99	170	78	0.4204	0.4142	0.5574	0.6341	-0.17845
Ggamma30A	3_Junction_15213_Junction_15216	3_Junction_15213_Junction_15216	J002	0.00988438	12.4688	0.000413807	0.00522543	13.6341	12.3565	-0.47033	chr2L	9257206	9272464	15259	+	193	140	135	45	0.5796	0.5858	0.4426	0.3659	0.17845
CG33298	3_Junction_15370_Junction_15371	3_Junction_15370_Junction_15371	J001	0.0786585	9.93872	0.00161838	0.0155591	6.46313	3.91633	-1.61071	chr2L	9519479	9519718	240	+	18	24	8	2	0.2308	0.3636	0.1039	0.0339	0.2283
CG33298	3_Junction_15370_Junction_15371	3_Junction_15370_Junction_15371	J002	0.0692121	10.6451	0.00110362	0.0114511	9.14693	11.1027	0.792275	chr2L	9519534	9519718	185	+	60	42	69	57	0.7692	0.6364	0.8961	0.9661	-0.2283
Ih	3_Junction_16383_Junction_16387	3_Junction_16383_Junction_16387	J001	0.0523546	7.43929	0.00638152	0.0453607	11.5294	13.1305	0.599433	chr2R	10179886	10184204	4319	+	75	86	135	124	0.6579	0.6935	0.8084	0.9051	-0.18105
Ih	3_Junction_16383_Junction_16387	3_Junction_16383_Junction_16387	J002	0.0550238	7.1952	0.0073099	0.0504187	8.87776	7.00985	-0.861802	chr2R	10181693	10184204	2512	+	39	38	32	13	0.3421	0.3065	0.1916	0.0949	0.18105
ckn	3_Junction_16869_Junction_16875	3_Junction_16869_Junction_16875	J001	0.106122	27.3359	1.71006e-07	6.75778e-06	8.81185	4.21931	-2.49313	chr2R	10851430	10859233	7804	+	40	42	7	6	0.4878	0.7	0.0972	0.0484	0.5211
ckn	3_Junction_16869_Junction_16875	3_Junction_16869_Junction_16875	J002	0.103249	27.8919	1.28283e-07	5.24983e-06	7.7297	12.1461	1.82099	chr2R	10853504	10859233	5730	+	42	18	65	118	0.5122	0.3	0.9028	0.9516	-0.5211
Arf51F	3_Junction_17215_Junction_17217_Junction_17220	3_Junction_17215_Junction_17217_Junction_17220	J001	0.0103118	1.52715	0.216541	0.516144	10.1339	10.4799	0.138741	chr2R	11210217	11210952	736	+	20	35	124	134	0.2778	0.3043	0.3333	0.3775	-0.06435
Arf51F	3_Junction_17215_Junction_17217_Junction_17220	3_Junction_17215_Junction_17217_Junction_17220	J002	0.012272	8.41286	0.00372577	0.030093	13.3078	11.8928	-0.525944	chr2R	11210246	11210952	707	+	50	77	204	174	0.6944	0.6696	0.5484	0.4901	0.16275
Arf51F	3_Junction_17215_Junction_17217_Junction_17220	3_Junction_17215_Junction_17217_Junction_17220	J003	0.0134749	15.497	8.26343e-05	0.00139431	3.68054	7.05075	2.10123	chr2R	11210646	11210952	307	+	2	3	44	47	0.0278	0.0261	0.1183	0.1324	-0.0984
CG43729	3_Junction_17321_Junction_17338	3_Junction_17321_Junction_17338	J001	0.0374181	21.403	3.7218e-06	9.90904e-05	9.97016	12.6496	1.0368	chr2R	11311910	11340360	28451	+	50	35	104	181	0.5102	0.3977	0.7591	0.8341	-0.34265
CG43729	3_Junction_17321_Junction_17338	3_Junction_17321_Junction_17338	J002	0.0382006	21.1041	4.34988e-06	0.000113853	10.6294	7.63197	-1.28261	chr2R	11314132	11340360	26229	+	48	53	33	36	0.4898	0.6023	0.2409	0.1659	0.34265
CG43729	3_Junction_17383_Junction_17384	3_Junction_17383_Junction_17384	J001	0.0120534	44.6566	2.34801e-11	2.42379e-09	13.3154	10.4444	-1.09085	chr2R	11352996	11353153	158	+	173	144	66	38	0.5966	0.6516	0.2651	0.3089	0.3371
CG43729	3_Junction_17383_Junction_17384	3_Junction_17383_Junction_17384	J002	0.0120406	44.683	2.31657e-11	2.39518e-09	11.4049	14.0602	0.985015	chr2R	11353011	11353153	143	+	117	77	183	85	0.4034	0.3484	0.7349	0.6911	-0.3371
d4	3_Junction_17668_Junction_17670	3_Junction_17668_Junction_17670	J001	0.0117853	15.6093	7.78726e-05	0.00132806	8.91373	6.56486	-1.10375	chr2R	1182562	1182619	58	+	50	29	24	14	0.2703	0.2479	0.1004	0.1284	0.1447
d4	3_Junction_17668_Junction_17670	3_Junction_17668_Junction_17670	J002	0.0108987	16.0758	6.08563e-05	0.00108497	12.6952	13.8471	0.421378	chr2R	1182568	1182619	52	+	135	88	215	95	0.7297	0.7521	0.8996	0.8716	-0.1447
CG5065	3_Junction_18458_Junction_18462_Junction_18472_Junction_18477	3_Junction_18458_Junction_18462_Junction_18472_Junction_18477	J001	0.0923563	13.9159	0.000191171	0.00278096	14.3219	17.9412	1.26696	chr2R	12495839	12506307	10469	+	251	184	388	260	0.3247	0.1724	0.676	0.5778	-0.37835
CG5065	3_Junction_18458_Junction_18462_Junction_18472_Junction_18477	3_Junction_18458_Junction_18462_Junction_18472_Junction_18477	J002	0.103595	0.659508	0.416734	0.738879	14.1193	14.873	0.269385	chr2R	12496830	12506307	9478	+	249	166	155	152	0.3221	0.1556	0.27	0.3378	-0.06505
CG5065	3_Junction_18458_Junction_18462_Junction_18472_Junction_18477	3_Junction_18458_Junction_18462_Junction_18472_Junction_18477	J003	0.0221152	2.85629	0.0910174	0.297559	6.62687	7.68738	0.521427	chr2R	12500078	12506307	6230	+	18	30	19	24	0.0233	0.0281	0.0331	0.0533	-0.0175
CG5065	3_Junction_18458_Junction_18462_Junction_18472_Junction_18477	3_Junction_18458_Junction_18462_Junction_18472_Junction_18477	J004	0.180746	28.1853	1.10236e-07	4.57546e-06	17.6866	6.24196	-4.54207	chr2R	12505648	12506307	660	+	255	687	12	14	0.3299	0.6439	0.0209	0.0311	0.4609
gprs	3_Junction_18533_Junction_18535	3_Junction_18533_Junction_18535	J001	0.0628071	13.2402	0.000274015	0.00373949	7.06999	4.23196	-1.68037	chr2R	12529197	12530446	1250	+	34	11	7	7	0.5574	0.3438	0.1148	0.1346	0.3259
gprs	3_Junction_18533_Junction_18535	3_Junction_18533_Junction_18535	J002	0.0582567	13.8347	0.00019962	0.00288174	7.31057	9.60481	1.02151	chr2R	12529701	12530446	746	+	27	21	54	45	0.4426	0.6562	0.8852	0.8654	-0.3259
mbl	3_Junction_19123_Junction_19144	3_Junction_19123_Junction_19144	J001	0.0220892	51.1297	8.64617e-13	1.12059e-10	16.019	19.174	1.0885	chr2R	13107608	13162913	55306	+	151	137	1122	849	0.6623	0.5905	0.9189	0.8918	-0.27895
mbl	3_Junction_19123_Junction_19144	3_Junction_19123_Junction_19144	J002	0.0224133	50.5646	1.15304e-12	1.45917e-10	13.9537	10.1038	-1.45933	chr2R	13153716	13162913	9198	+	77	95	99	103	0.3377	0.4095	0.0811	0.1082	0.27895
Uhg1	3_Junction_19553_Junction_19554	3_Junction_19553_Junction_19554	J001	0.131733	7.90902	0.00491889	0.0372365	4.19853	7.21515	1.77639	chr2R	13586949	13587361	413	+	5	1	19	87	0.0505	0.0111	0.1159	0.226	-0.14015
Uhg1	3_Junction_19553_Junction_19554	3_Junction_19553_Junction_19554	J002	0.126878	8.10772	0.00440771	0.0343436	15.2023	12.1126	-1.12318	chr2R	13586954	13587361	408	+	94	89	145	298	0.9495	0.9889	0.8841	0.774	0.14015
pAbp	3_Junction_19895_Junction_19899	3_Junction_19895_Junction_19899	J001	0.110517	11.6795	0.000631934	0.00733827	17.5635	14.4707	-1.08364	chr2R	14028459	14028991	533	+	185	195	280	407	0.9893	0.9606	0.8023	0.8867	0.13045
pAbp	3_Junction_19895_Junction_19899	3_Junction_19895_Junction_19899	J002	0.114402	11.3978	0.000735313	0.00827182	4.99331	8.06271	1.62965	chr2R	14028921	14028991	71	+	2	8	69	52	0.0107	0.0394	0.1977	0.1133	-0.13045
CG10737	3_Junction_20754_Junction_20760	3_Junction_20754_Junction_20760	J001	0.0426448	15.78	7.11505e-05	0.00123275	6.07799	2.81641	-2.40177	chr2R	15062591	15063691	1101	+	20	40	2	1	0.4348	0.5634	0.1176	0.0556	0.4125
CG10737	3_Junction_20754_Junction_20760	3_Junction_20754_Junction_20760	J002	0.0411295	15.9564	6.4819e-05	0.00114109	5.91717	8.12212	1.10391	chr2R	15062813	15063691	879	+	26	31	15	17	0.5652	0.4366	0.8824	0.9444	-0.4125
par-1	3_Junction_21079_Junction_21082	3_Junction_21079_Junction_21082	J001	0.0285154	28.4924	9.40653e-08	4.00061e-06	11.5494	13.2431	0.633019	chr2R	15344480	15347298	2819	+	77	68	114	184	0.8462	0.7727	0.9744	0.984	-0.16975
par-1	3_Junction_21079_Junction_21082	3_Junction_21079_Junction_21082	J002	0.0355013	26.3617	2.83096e-07	1.05651e-05	6.72944	2.65182	-2.92664	chr2R	15344978	15347298	2321	+	14	20	3	3	0.1538	0.2273	0.0256	0.016	0.16975
CG12484	3_Junction_21596_Junction_21597	3_Junction_21596_Junction_21597	J001	0.0194201	6.52565	0.0106329	0.0666053	7.06782	5.30466	-0.963178	chr2R	16359480	16359577	98	+	37	47	6	6	0.3217	0.3884	0.1875	0.1579	0.18235
CG12484	3_Junction_21596_Junction_21597	3_Junction_21596_Junction_21597	J002	0.0183048	6.63616	0.00999293	0.06354	8.91532	10.0222	0.46237	chr2R	16359489	16359577	89	+	78	74	26	32	0.6783	0.6116	0.8125	0.8421	-0.18235
Treh	3_Junction_22187_Junction_22191	3_Junction_22187_Junction_22191	J001	0.0320781	12.6078	0.000384145	0.00492033	6.17037	7.63293	0.737907	chr2R	16964644	16972701	8058	+	28	11	29	16	0.6364	0.5238	0.9062	0.9412	-0.3436
Treh	3_Junction_22187_Junction_22191	3_Junction_22187_Junction_22191	J002	0.0389976	12.0544	0.000516696	0.00626199	5.17882	2.54766	-2.17529	chr2R	16972203	16972701	499	+	16	10	3	1	0.3636	0.4762	0.0938	0.0588	0.3436
MAN1	3_Junction_24633_Junction_24634	3_Junction_24633_Junction_24634	J001	0.0159806	7.00095	0.00814665	0.0546111	7.27243	5.49914	-0.946502	chr2R	19921943	19922209	267	+	11	17	24	18	0.1833	0.25	0.1013	0.1098	0.1111
MAN1	3_Junction_24633_Junction_24634	3_Junction_24633_Junction_24634	J002	0.0138967	7.29065	0.00693142	0.04842	11.6083	12.4311	0.310582	chr2R	19921955	19922209	255	+	49	51	213	146	0.8167	0.75	0.8987	0.8902	-0.1111
CG31760	3_Junction_2536_Junction_2542_Junction_2543	3_Junction_2536_Junction_2542_Junction_2543	J001	0.0244033	1.84058	0.174882	0.452436	8.72138	9.40277	0.290959	chr2L	12142833	12145068	2236	+	20	19	38	139	0.5263	0.5278	0.5758	0.6814	-0.10155
CG31760	3_Junction_2536_Junction_2542_Junction_2543	3_Junction_2536_Junction_2542_Junction_2543	J002	0.0277941	49.1498	2.37148e-12	2.84499e-10	7.66468	1.88428	-4.39278	chr2L	12142855	12145068	2214	+	14	14	2	3	0.3684	0.3889	0.0303	0.0147	0.35615
CG31760	3_Junction_2536_Junction_2542_Junction_2543	3_Junction_2536_Junction_2542_Junction_2543	J003	0.0276112	12.7701	0.000352203	0.0045721	4.18336	7.15115	1.7563	chr2L	12142873	12145068	2196	+	4	3	26	62	0.1053	0.0833	0.3939	0.3039	-0.2546
Camta	3_Junction_29667_Junction_29668	3_Junction_29667_Junction_29668	J001	0.0199736	7.62417	0.00575911	0.041903	7.72423	6.07832	-0.831126	chr2R	5362709	5363604	896	+	50	51	9	8	0.5051	0.5862	0.3103	0.2857	0.24765
Camta	3_Junction_29667_Junction_29668	3_Junction_29667_Junction_29668	J002	0.0199271	7.62931	0.00574273	0.0418453	7.18622	8.6166	0.661117	chr2R	5362930	5363604	675	+	49	36	20	20	0.4949	0.4138	0.6897	0.7143	-0.24765
CG2269	3_Junction_30425_Junction_30428_Junction_30431	3_Junction_30425_Junction_30428_Junction_30431	J001	0.038947	12.484	0.000410446	0.00519114	11.9935	8.98665	-1.20182	chr2R	5972927	5978046	5120	+	54	37	58	111	0.1304	0.0898	0.0312	0.0474	0.0708
CG2269	3_Junction_30425_Junction_30428_Junction_30431	3_Junction_30425_Junction_30428_Junction_30431	J002	0.00808601	23.089	1.54674e-06	4.64052e-05	14.1595	12.0876	-0.760962	chr2R	5975109	5978046	2938	+	81	76	195	206	0.1957	0.1845	0.105	0.088	0.0936
CG2269	3_Junction_30425_Junction_30428_Junction_30431	3_Junction_30425_Junction_30428_Junction_30431	J003	0.00637702	48.387	3.49884e-12	4.12773e-10	19.5815	21.1591	0.535124	chr2R	5975273	5978046	2774	+	279	299	1605	2025	0.6739	0.7257	0.8638	0.8646	-0.1644
14-3-3zeta	3_Junction_30482_Junction_30483_Junction_30488	3_Junction_30482_Junction_30483_Junction_30488	J001	0.00388781	9.57261	0.00197502	0.0182105	15.6849	14.7677	-0.324275	chr2R	5987243	5991759	4517	+	162	187	185	329	0.1067	0.1213	0.0827	0.0826	0.03135
14-3-3zeta	3_Junction_30482_Junction_30483_Junction_30488	3_Junction_30482_Junction_30483_Junction_30488	J002	0.0121032	9.17839	0.00244889	0.0216861	22.2282	21.4713	-0.255357	chr2R	5987355	5991759	4405	+	831	818	1008	1535	0.5474	0.5308	0.4506	0.3852	0.1212
14-3-3zeta	3_Junction_30482_Junction_30483_Junction_30488	3_Junction_30482_Junction_30483_Junction_30488	J003	0.0111866	16.2677	5.49935e-05	0.000997575	20.35	22.4226	0.700363	chr2R	5988602	5991759	3158	+	525	536	1044	2121	0.3458	0.3478	0.4667	0.5322	-0.15265
aret	3_Junction_3062_Junction_3068	3_Junction_3062_Junction_3068	J001	0.0241507	28.3807	9.96542e-08	4.19551e-06	7.52145	3.95124	-2.11186	chr2L	12299394	12304444	5051	+	32	30	5	5	0.4848	0.566	0.0893	0.1389	0.4113
aret	3_Junction_3062_Junction_3068	3_Junction_3062_Junction_3068	J002	0.0225788	29.0019	7.23067e-08	3.16872e-06	7.25467	9.60257	1.04772	chr2L	12300621	12304444	3824	+	34	23	51	31	0.5152	0.434	0.9107	0.8611	-0.4113
CG7220	3_Junction_31368_Junction_31372	3_Junction_31368_Junction_31372	J001	0.0323158	9.08172	0.00258177	0.0226323	13.912	12.3458	-0.574888	chr2R	6619301	6624160	4860	+	105	95	212	107	0.7343	0.7787	0.6074	0.4931	0.20625
CG7220	3_Junction_31368_Junction_31372	3_Junction_31368_Junction_31372	J002	0.0325952	9.02789	0.00265892	0.0231667	9.65247	11.3927	0.692587	chr2R	6623560	6624160	601	+	38	27	137	110	0.2657	0.2213	0.3926	0.5069	-0.20625
qvr	3_Junction_32233_Junction_32234	3_Junction_32233_Junction_32234	J001	0.0987272	5.61947	0.017762	0.0968549	6.05734	8.04231	0.989612	chr2R	7332920	7334659	1740	+	11	16	29	40	0.1028	0.1798	0.2636	0.4545	-0.21775
qvr	3_Junction_32233_Junction_32234	3_Junction_32233_Junction_32234	J002	0.0956498	5.75701	0.016423	0.0914957	12.0336	10.1203	-0.745464	chr2R	7333694	7334659	966	+	96	73	81	48	0.8972	0.8202	0.7364	0.5455	0.21775
CG45086	3_Junction_33370_Junction_33374	3_Junction_33370_Junction_33374	J001	0.0475135	8.09327	0.00444298	0.034564	8.69365	10.453	0.731779	chr2R	8500356	8501070	715	+	27	17	102	111	0.4219	0.4359	0.7612	0.6271	-0.26525
CG45086	3_Junction_33370_Junction_33374	3_Junction_33370_Junction_33374	J002	0.0482305	8.01787	0.00463181	0.0356285	9.68457	7.84805	-0.80008	chr2R	8500389	8501070	682	+	37	22	32	66	0.5781	0.5641	0.2388	0.3729	0.26525
CG6329	3_Junction_34368_Junction_34369_Junction_34370_Junction_34373_Junction_34377_Junction_34384	3_Junction_34368_Junction_34369_Junction_34370_Junction_34373_Junction_34377_Junction_34384	J001	0.063628	8.3073	0.00394861	0.0314979	13.8531	18.071	1.48031	chr2R	9713986	9717143	3158	+	144	167	254	552	0.3038	0.4103	0.5439	0.6849	-0.25735
CG6329	3_Junction_34368_Junction_34369_Junction_34370_Junction_34373_Junction_34377_Junction_34384	3_Junction_34368_Junction_34369_Junction_34370_Junction_34373_Junction_34377_Junction_34384	J002	0.0173887	14.9049	0.000113069	0.00181309	12.5559	11.5254	-0.388784	chr2R	9714022	9717143	3122	+	132	95	69	91	0.2785	0.2334	0.1478	0.1129	0.1256
CG6329	3_Junction_34368_Junction_34369_Junction_34370_Junction_34373_Junction_34377_Junction_34384	3_Junction_34368_Junction_34369_Junction_34370_Junction_34373_Junction_34377_Junction_34384	J003	0.0578793	0.813439	0.367106	0.691243	10.1414	10.5106	0.147938	chr2R	9714090	9717143	3054	+	69	50	64	58	0.1456	0.1229	0.137	0.072	0.02975
CG6329	3_Junction_34368_Junction_34369_Junction_34370_Junction_34373_Junction_34377_Junction_34384	3_Junction_34368_Junction_34369_Junction_34370_Junction_34373_Junction_34377_Junction_34384	J004	0.00911291	14.6646	0.000128435	0.00201928	11.0246	10.2733	-0.29713	chr2R	9714542	9717143	2602	+	82	69	49	65	0.173	0.1695	0.1049	0.0806	0.0785
CG6329	3_Junction_34368_Junction_34369_Junction_34370_Junction_34373_Junction_34377_Junction_34384	3_Junction_34368_Junction_34369_Junction_34370_Junction_34373_Junction_34377_Junction_34384	J005	0.0281811	3.43327	0.0638954	0.235644	7.78214	7.41108	-0.175367	chr2R	9714914	9717143	2230	+	39	20	18	30	0.0823	0.0491	0.0385	0.0372	0.02785
CG6329	3_Junction_34368_Junction_34369_Junction_34370_Junction_34373_Junction_34377_Junction_34384	3_Junction_34368_Junction_34369_Junction_34370_Junction_34373_Junction_34377_Junction_34384	J006	0.0596114	0.122837	0.725978	0.936456	4.17339	5.40832	0.822215	chr2R	9717084	9717143	60	+	8	6	13	10	0.0169	0.0147	0.0278	0.0124	-0.0043
mRpL53	3_Junction_34550_Junction_34551_Junction_34553	3_Junction_34550_Junction_34551_Junction_34553	J001	0.00846141	15.0852	0.000102764	0.00167836	12.5767	14.2768	0.620103	chr2R	9841950	9842420	471	+	126	112	169	141	0.2451	0.2917	0.4024	0.4209	-0.14325
mRpL53	3_Junction_34550_Junction_34551_Junction_34553	3_Junction_34550_Junction_34551_Junction_34553	J002	0.0056185	11.3768	0.000743661	0.00834388	16.2018	15.368	-0.292651	chr2R	9842149	9842420	272	+	341	248	233	173	0.6634	0.6458	0.5548	0.5164	0.119
mRpL53	3_Junction_34550_Junction_34551_Junction_34553	3_Junction_34550_Junction_34551_Junction_34553	J003	0.0288594	1.77475	0.182796	0.46505	8.21406	6.93234	-0.607959	chr2R	9842366	9842420	55	+	47	24	18	21	0.0914	0.0625	0.0429	0.0627	0.02415
CG8067	3_Junction_34597_Junction_34598	3_Junction_34597_Junction_34598	J001	0.017413	7.71082	0.00548907	0.0403824	11.3256	10.4622	-0.338296	chr2R	9871645	9871701	57	+	32	49	151	91	0.9697	0.9245	0.8297	0.7982	0.13315
CG8067	3_Junction_34597_Junction_34598	3_Junction_34597_Junction_34598	J002	0.0208049	7.45731	0.00631795	0.0450036	3.57291	5.8003	1.52916	chr2R	9871649	9871701	53	+	1	4	31	23	0.0303	0.0755	0.1703	0.2018	-0.13315
CG42784	3_Junction_3831_Junction_3842	3_Junction_3831_Junction_3842	J001	0.035149	19.6781	9.16453e-06	0.000217431	6.54533	3.23031	-2.2405	chr2L	13476433	13496589	20157	+	15	26	5	2	0.3846	0.4561	0.1282	0.0408	0.33585
CG42784	3_Junction_3831_Junction_3842	3_Junction_3831_Junction_3842	J002	0.0303234	20.698	5.37732e-06	0.000137396	7.38086	9.34667	0.879872	chr2L	13489578	13496589	7012	+	24	31	34	47	0.6154	0.5439	0.8718	0.9592	-0.33585
kuz	3_Junction_3881_Junction_3885	3_Junction_3881_Junction_3885	J001	0.0172985	5.85186	0.0155606	0.0880618	9.32991	10.7563	0.579417	chr2L	13550293	13551140	848	+	19	26	64	204	0.2235	0.26	0.3386	0.4088	-0.13195
kuz	3_Junction_3881_Junction_3885	3_Junction_3881_Junction_3885	J002	0.017052	5.89811	0.0151571	0.0863627	13.5666	12.4455	-0.412547	chr2L	13550420	13551140	721	+	66	74	125	295	0.7765	0.74	0.6614	0.5912	0.13195
CG12304	3_Junction_39521_Junction_39523	3_Junction_39521_Junction_39523	J001	0.0285907	6.62278	0.0100682	0.0638582	11.5659	10.4361	-0.440988	chr3L	15576981	15577385	405	+	85	76	85	45	0.8252	0.8539	0.7328	0.6164	0.16495
CG12304	3_Junction_39521_Junction_39523	3_Junction_39521_Junction_39523	J002	0.0306379	6.41279	0.0113302	0.0697459	6.17597	7.78803	0.807479	chr3L	15577195	15577385	191	+	18	13	31	28	0.1748	0.1461	0.2672	0.3836	-0.16495
kuz	3_Junction_3974_Junction_3976	3_Junction_3974_Junction_3976	J001	0.0110883	105.907	7.72842e-25	4.08048e-22	12.9798	9.82389	-1.21858	chr2L	13636213	13637286	1074	+	132	101	52	57	0.9496	0.9528	0.4685	0.4597	0.4871
kuz	3_Junction_3974_Junction_3976	3_Junction_3974_Junction_3976	J002	0.011776	103.928	2.09765e-24	1.08094e-21	4.0351	10.3412	3.26722	chr2L	13636843	13637286	444	+	7	5	59	67	0.0504	0.0472	0.5315	0.5403	-0.4871
GXIVsPLA2	3_Junction_39753_Junction_39754	3_Junction_39753_Junction_39754	J001	0.0315669	26.0904	3.25805e-07	1.19173e-05	9.28104	11.1496	0.753719	chr3L	15948409	15948486	78	+	30	35	70	134	0.6667	0.7292	0.9333	0.9781	-0.25775
GXIVsPLA2	3_Junction_39753_Junction_39754	3_Junction_39753_Junction_39754	J002	0.0408189	23.7397	1.10284e-06	3.4535e-05	6.6362	2.80884	-2.70726	chr3L	15948414	15948486	73	+	15	13	5	3	0.3333	0.2708	0.0667	0.0219	0.25775
Mbs	3_Junction_39915_Junction_39918	3_Junction_39915_Junction_39918	J001	0.0212465	15.5927	7.85589e-05	0.00133764	8.014	5.70176	-1.17723	chr3L	16070909	16073857	2949	+	19	26	15	21	0.6129	0.4815	0.2113	0.2308	0.32615
Mbs	3_Junction_39915_Junction_39918	3_Junction_39915_Junction_39918	J002	0.0198181	15.9468	6.51461e-05	0.00114591	7.6616	9.46146	0.79444	chr3L	16072826	16073857	1032	+	12	28	56	70	0.3871	0.5185	0.7887	0.7692	-0.32615
Lmpt	3_Junction_40805_Junction_40810	3_Junction_40805_Junction_40810	J001	0.0434896	4.92121	0.0265289	0.128223	5.65136	3.97692	-1.11508	chr3L	16906498	16913980	7483	+	11	24	4	5	0.2895	0.4364	0.1429	0.1786	0.2022
Lmpt	3_Junction_40805_Junction_40810	3_Junction_40805_Junction_40810	J002	0.0389674	5.13366	0.0234662	0.117805	6.98578	8.15046	0.552498	chr3L	16912802	16913980	1179	+	27	31	24	23	0.7105	0.5636	0.8571	0.8214	-0.2022
Taf6	3_Junction_42628_Junction_42629	3_Junction_42628_Junction_42629	J001	0.0814997	13.4798	0.000241152	0.00336095	7.7524	10.2319	1.06755	chr3L	19594247	19594308	62	+	46	34	63	20	0.7302	0.5397	0.9403	0.9524	-0.3114
Taf6	3_Junction_42628_Junction_42629	3_Junction_42628_Junction_42629	J002	0.0876319	12.9678	0.000316887	0.00420173	6.21862	3.08432	-2.20625	chr3L	19594249	19594308	60	+	17	29	4	1	0.2698	0.4603	0.0597	0.0476	0.3114
nAChRalpha5	3_Junction_4264_Junction_4266_Junction_4271	3_Junction_4264_Junction_4266_Junction_4271	J001	0.0152939	37.4181	9.53318e-10	6.53266e-08	6.88074	3.18884	-2.45144	chr2L	14040378	14041319	942	+	58	48	2	1	0.324	0.3582	0.0417	0.0192	0.31065
nAChRalpha5	3_Junction_4264_Junction_4266_Junction_4271	3_Junction_4264_Junction_4266_Junction_4271	J002	0.146431	1.30738	0.25287	0.563845	7.75927	11.3474	1.50321	chr2L	14040394	14041319	926	+	90	54	22	40	0.5028	0.403	0.4583	0.7692	-0.16085
nAChRalpha5	3_Junction_4264_Junction_4266_Junction_4271	3_Junction_4264_Junction_4266_Junction_4271	J003	0.138013	1.49182	0.221935	0.52336	5.5178	9.24476	1.82481	chr2L	14040465	14041319	855	+	31	32	24	11	0.1732	0.2388	0.5	0.2115	-0.14975
Pka-R1	3_Junction_43842_Junction_43849_Junction_43852_Junction_43858_Junction_43864	3_Junction_43842_Junction_43849_Junction_43852_Junction_43858_Junction_43864	J001	0.0187253	24.4483	7.63303e-07	2.4757e-05	12.4646	8.9458	-1.39606	chr3L	20809933	20825944	16012	+	89	72	54	53	0.3589	0.3117	0.1565	0.1137	0.2002
Pka-R1	3_Junction_43842_Junction_43849_Junction_43852_Junction_43858_Junction_43864	3_Junction_43842_Junction_43849_Junction_43852_Junction_43858_Junction_43864	J002	0.011415	43.3006	4.69446e-11	4.4732e-09	12.01	7.84534	-1.71588	chr3L	20812569	20825944	13376	+	79	64	28	48	0.3185	0.2771	0.0812	0.103	0.2057
Pka-R1	3_Junction_43842_Junction_43849_Junction_43852_Junction_43858_Junction_43864	3_Junction_43842_Junction_43849_Junction_43852_Junction_43858_Junction_43864	J003	0.01044	30.0648	4.17857e-08	1.935e-06	11.5218	13.9157	0.888035	chr3L	20813826	20825944	12119	+	57	68	176	230	0.2298	0.2944	0.5101	0.4936	-0.23975
Pka-R1	3_Junction_43842_Junction_43849_Junction_43852_Junction_43858_Junction_43864	3_Junction_43842_Junction_43849_Junction_43852_Junction_43858_Junction_43864	J004	0.0177471	6.24546	0.0124512	0.0748055	4.32575	6.37979	1.25845	chr3L	20821440	20825944	4505	+	6	5	17	29	0.0242	0.0216	0.0493	0.0622	-0.03285
Pka-R1	3_Junction_43842_Junction_43849_Junction_43852_Junction_43858_Junction_43864	3_Junction_43842_Junction_43849_Junction_43852_Junction_43858_Junction_43864	J005	0.0106072	24.1423	8.94752e-07	2.85886e-05	7.51857	10.7042	1.36585	chr3L	20825700	20825944	245	+	17	22	70	106	0.0685	0.0952	0.2029	0.2275	-0.13335
mub	3_Junction_44874_Junction_44881	3_Junction_44874_Junction_44881	J001	0.0514531	8.62773	0.00331084	0.0274412	7.14736	4.80689	-1.31826	chr3L	21868425	21900444	32020	+	56	29	7	3	0.3256	0.2248	0.1228	0.0545	0.18655
mub	3_Junction_44874_Junction_44881	3_Junction_44874_Junction_44881	J002	0.0483207	8.91167	0.00283354	0.0243489	10.2484	11.9779	0.672777	chr3L	21873041	21900444	27404	+	116	100	50	52	0.6744	0.7752	0.8772	0.9455	-0.18655
CG17698	3_Junction_46124_Junction_46127	3_Junction_46124_Junction_46127	J001	0.049388	28.4682	9.52501e-08	4.04179e-06	5.65097	9.72197	1.94578	chr3L	23731284	23739288	8005	+	7	9	62	103	0.0543	0.0687	0.2995	0.4328	-0.30465
CG17698	3_Junction_46124_Junction_46127	3_Junction_46124_Junction_46127	J002	0.0483494	28.87	7.74013e-08	3.35965e-06	14.9893	11.6267	-1.2319	chr3L	23734184	23739288	5105	+	122	122	145	135	0.9457	0.9313	0.7005	0.5672	0.30465
CG45186	3_Junction_46154_Junction_46292_Junction_46406	3_Junction_46154_Junction_46292_Junction_46406	J001	0.025964	25.8953	3.60444e-07	1.2949e-05	2.03703	6.29442	3.47823	chr3L	2377931	2434624	56694	+	2	1	13	21	0.027	0.0179	0.2407	0.28	-0.2379
CG45186	3_Junction_46154_Junction_46292_Junction_46406	3_Junction_46154_Junction_46292_Junction_46406	J002	0.0148758	9.96503	0.00159542	0.0153696	9.59668	8.29987	-0.557958	chr3L	2412303	2434624	22322	+	54	43	30	37	0.7297	0.7679	0.5556	0.4933	0.22435
CG45186	3_Junction_46154_Junction_46292_Junction_46406	3_Junction_46154_Junction_46292_Junction_46406	J003	0.016273	0.0507185	0.821818	0.9691	6.00328	5.78526	-0.12272	chr3L	2429429	2434624	5196	+	18	12	11	17	0.2432	0.2143	0.2037	0.2267	0.01355
CG45186	3_Junction_46471_Junction_46490	3_Junction_46471_Junction_46490	J001	0.0226658	4.35885	0.0368171	0.160837	7.63074	6.86755	-0.371845	chr3L	2485228	2495009	9782	+	21	15	31	31	0.913	0.8824	0.7209	0.7381	0.1682
CG45186	3_Junction_46471_Junction_46490	3_Junction_46471_Junction_46490	J002	0.0293342	4.16646	0.0412319	0.174307	2.83781	4.4373	1.36347	chr3L	2494765	2495009	245	+	2	2	12	11	0.087	0.1176	0.2791	0.2619	-0.1682
MEP-1	3_Junction_46671_Junction_46673	3_Junction_46671_Junction_46673	J001	0.0522004	5.11687	0.0236944	0.118629	8.19408	9.7131	0.653668	chr3L	2633809	2637066	3258	+	34	21	36	82	0.5484	0.4118	0.6316	0.7593	-0.21535
MEP-1	3_Junction_46671_Junction_46673	3_Junction_46671_Junction_46673	J002	0.0534343	5.03978	0.0247717	0.122347	8.40434	6.76361	-0.778481	chr3L	2636001	2637066	1066	+	28	30	21	26	0.4516	0.5882	0.3684	0.2407	0.21535
CG11486	3_Junction_47099_Junction_47102_Junction_47113	3_Junction_47099_Junction_47102_Junction_47113	J001	0.0259151	24.1435	8.94193e-07	2.85849e-05	10.5314	7.56057	-1.27751	chr3L	3071189	3073079	1891	+	42	41	33	47	0.4719	0.5775	0.2276	0.1722	0.3248
CG11486	3_Junction_47099_Junction_47102_Junction_47113	3_Junction_47099_Junction_47102_Junction_47113	J002	0.0471878	5.48542	0.0191757	0.102166	7.22832	5.17828	-1.11991	chr3L	3071307	3073079	1773	+	21	10	15	18	0.236	0.1408	0.1034	0.0659	0.10375
CG11486	3_Junction_47099_Junction_47102_Junction_47113	3_Junction_47099_Junction_47102_Junction_47113	J003	0.0259828	36.8835	1.25405e-09	8.34491e-08	8.47908	12.2492	1.51906	chr3L	3072841	3073079	239	+	26	20	97	208	0.2921	0.2817	0.669	0.7619	-0.42855
CG18619	3_Junction_487_Junction_488	3_Junction_487_Junction_488	J001	0.0168995	9.81174	0.00173401	0.0164338	19.7548	18.4408	-0.448454	chr2L	10264885	10264945	61	+	636	450	533	543	0.363	0.2872	0.2108	0.2064	0.1165
CG18619	3_Junction_487_Junction_488	3_Junction_487_Junction_488	J002	0.0168719	9.82677	0.0017199	0.0163352	22.8821	24.1287	0.418904	chr2L	10264889	10264945	57	+	1116	1117	1995	2088	0.637	0.7128	0.7892	0.7936	-0.1165
PVRAP	3_Junction_49541_Junction_49546	3_Junction_49541_Junction_49546	J001	0.0584942	5.48423	0.0191887	0.102226	15.8307	14.122	-0.606398	chr3L	6011250	6013158	1909	+	88	85	375	540	0.7857	0.8095	0.5342	0.6888	0.1861
PVRAP	3_Junction_49541_Junction_49546	3_Junction_49541_Junction_49546	J002	0.0586822	5.47014	0.0193441	0.102774	10.465	12.2325	0.681944	chr3L	6012957	6013158	202	+	24	20	327	244	0.2143	0.1905	0.4658	0.3112	-0.1861
nmo	3_Junction_51645_Junction_51647	3_Junction_51645_Junction_51647	J001	0.00313852	24.1265	9.02093e-07	2.87946e-05	19.7696	18.7764	-0.33864	chr3L	8040700	8042967	2268	+	648	598	648	368	0.6384	0.6615	0.5307	0.5227	0.12325
nmo	3_Junction_51645_Junction_51647	3_Junction_51645_Junction_51647	J002	0.00314568	24.0944	9.17245e-07	2.92203e-05	17.1668	18.3093	0.393452	chr3L	8041543	8042967	1425	+	367	306	573	336	0.3616	0.3385	0.4693	0.4773	-0.12325
CG42389	3_Junction_5494_Junction_5497	3_Junction_5494_Junction_5497	J001	0.0171785	35.0755	3.17173e-09	1.95694e-07	11.7528	13.0085	0.469352	chr2L	16652912	16657497	4586	+	84	64	152	141	0.8155	0.8312	0.987	0.986	-0.16315
CG42389	3_Junction_5494_Junction_5497	3_Junction_5494_Junction_5497	J002	0.0225033	32.9778	9.32189e-09	5.16303e-07	6.63548	2.13792	-3.51556	chr2L	16657429	16657497	69	+	19	13	2	2	0.1845	0.1688	0.013	0.014	0.16315
Sap47	3_Junction_56408_Junction_56409	3_Junction_56408_Junction_56409	J001	0.0993108	19.1988	1.1779e-05	0.00026896	24.6831	20.8209	-1.30036	chr3R	11779956	11780303	348	+	1682	1218	1887	391	0.7339	0.7377	0.3722	0.1837	0.45785
Sap47	3_Junction_56408_Junction_56409	3_Junction_56408_Junction_56409	J002	0.0993045	19.2	1.17716e-05	0.000268886	20.3019	24.1625	1.30162	chr3R	11779977	11780303	327	+	610	433	3183	1737	0.2661	0.2623	0.6278	0.8163	-0.45785
cpo	3_Junction_58026_Junction_58029	3_Junction_58026_Junction_58029	J001	0.00872255	74.6029	5.7559e-18	1.61904e-15	14.0474	11.2362	-1.04546	chr3R	13837435	13838868	1434	+	165	173	107	38	0.8549	0.8357	0.4632	0.4318	0.3978
cpo	3_Junction_58026_Junction_58029	3_Junction_58026_Junction_58029	J002	0.0089746	73.7669	8.79075e-18	2.44072e-15	7.88151	11.9238	1.66656	chr3R	13837872	13838868	997	+	28	34	124	50	0.1451	0.1643	0.5368	0.5682	-0.3978
CG42613	3_Junction_59600_Junction_59615	3_Junction_59600_Junction_59615	J001	0.0881418	7.02738	0.00802726	0.0540753	9.64745	7.63338	-0.885009	chr3R	14773729	14795139	21411	+	74	39	27	21	0.8706	0.7647	0.6429	0.4375	0.27745
CG42613	3_Junction_59600_Junction_59615	3_Junction_59600_Junction_59615	J002	0.0925791	6.78965	0.00916879	0.0595083	5.06747	7.25427	1.20208	chr3R	14785646	14795139	9494	+	11	12	15	27	0.1294	0.2353	0.3571	0.5625	-0.27745
Syp	3_Junction_61068_Junction_61070	3_Junction_61068_Junction_61070	J001	0.0146808	12.4769	0.000412012	0.0052089	7.73354	5.77776	-1.00395	chr3R	16606549	16617465	10917	+	60	58	7	6	0.6818	0.6905	0.3684	0.3158	0.34405
Syp	3_Junction_61068_Junction_61070	3_Junction_61068_Junction_61070	J002	0.0155712	12.3408	0.000443174	0.00552266	5.56116	7.60556	1.06939	chr3R	16609302	16617465	8164	+	28	26	12	13	0.3182	0.3095	0.6316	0.6842	-0.34405
Atpalpha	3_Junction_61335_Junction_61338_Junction_61344	3_Junction_61335_Junction_61338_Junction_61344	J001	0.0902642	11.8783	0.000567907	0.00673811	15.2222	19.8844	1.61061	chr3R	16792924	16798893	5970	+	273	265	405	610	0.1182	0.1243	0.2838	0.4976	-0.26945
Atpalpha	3_Junction_61335_Junction_61338_Junction_61344	3_Junction_61335_Junction_61338_Junction_61344	J002	0.00599303	0.266338	0.605799	0.875363	12.4101	11.9871	-0.158851	chr3R	16794208	16798893	4686	+	148	119	83	65	0.0641	0.0558	0.0582	0.053	0.00435
Atpalpha	3_Junction_61335_Junction_61338_Junction_61344	3_Junction_61335_Junction_61338_Junction_61344	J003	0.0802429	9.6899	0.00185283	0.0173044	23.2715	21.4645	-0.608831	chr3R	16796699	16798893	2195	+	1889	1748	939	551	0.8177	0.8199	0.658	0.4494	0.2651
Eip93F	3_Junction_62304_Junction_62319	3_Junction_62304_Junction_62319	J001	0.02139	22.2244	2.42574e-06	6.80151e-05	6.46458	8.56107	1.00272	chr3R	17792663	17821240	28578	+	18	14	44	37	0.4286	0.4828	0.88	0.8222	-0.3954
Eip93F	3_Junction_62304_Junction_62319	3_Junction_62304_Junction_62319	J002	0.0236313	21.6027	3.35374e-06	9.04261e-05	7.01491	4.0242	-1.80912	chr3R	17801776	17821240	19465	+	24	15	6	8	0.5714	0.5172	0.12	0.1778	0.3954
Eip93F	3_Junction_62305_Junction_62308_Junction_62309	3_Junction_62305_Junction_62308_Junction_62309	J001	0.0102896	11.949	0.000546765	0.00653783	11.985	10.6727	-0.506384	chr3R	17798183	17800875	2693	+	142	145	31	55	0.6927	0.736	0.5254	0.5189	0.1922
Eip93F	3_Junction_62305_Junction_62308_Junction_62309	3_Junction_62305_Junction_62308_Junction_62309	J002	0.0114531	29.5272	5.51388e-08	2.48894e-06	6.60417	9.8307	1.46825	chr3R	17798238	17800875	2638	+	32	26	23	45	0.1561	0.132	0.3898	0.4245	-0.2631
Eip93F	3_Junction_62305_Junction_62308_Junction_62309	3_Junction_62305_Junction_62308_Junction_62309	J003	0.0160878	4.96867	0.0258104	0.125706	6.55654	4.62935	-1.1386	chr3R	17798362	17800875	2514	+	31	26	5	6	0.1512	0.132	0.0847	0.0566	0.07095
Nrx-1	3_Junction_62737_Junction_62739	3_Junction_62737_Junction_62739	J001	0.00914754	7.41992	0.00645057	0.0457427	10.1296	8.84357	-0.536828	chr3R	18305442	18306516	1075	+	48	58	54	30	0.378	0.4143	0.2741	0.2479	0.13515
Nrx-1	3_Junction_62737_Junction_62739	3_Junction_62737_Junction_62739	J002	0.00886925	7.50246	0.00616149	0.0441539	11.6632	12.5632	0.338812	chr3R	18305487	18306516	1030	+	79	82	143	91	0.622	0.5857	0.7259	0.7521	-0.13515
slo	3_Junction_65480_Junction_65484	3_Junction_65480_Junction_65484	J001	0.221296	6.16325	0.0130432	0.0772634	7.42844	10.7807	1.43899	chr3R	20518038	20520677	2640	+	120	66	11	26	0.5263	0.292	0.6875	0.9286	-0.3989
slo	3_Junction_65480_Junction_65484	3_Junction_65480_Junction_65484	J002	0.220389	6.18293	0.0128988	0.0766539	8.69385	5.56232	-1.56205	chr3R	20519606	20520677	1072	+	108	160	5	2	0.4737	0.708	0.3125	0.0714	0.3989
msi	3_Junction_66271_Junction_66277_Junction_66281	3_Junction_66271_Junction_66277_Junction_66281	J001	0.0273961	10.1262	0.00146177	0.0143468	14.5755	13.0642	-0.54681	chr3R	21342071	21344981	2911	+	171	147	146	137	0.76	0.6806	0.5615	0.4824	0.19835
msi	3_Junction_66271_Junction_66277_Junction_66281	3_Junction_66271_Junction_66277_Junction_66281	J002	0.110003	4.0681	0.0437003	0.180977	6.94583	9.86157	1.30683	chr3R	21344159	21344981	823	+	16	21	35	84	0.0711	0.0972	0.1346	0.2958	-0.13105
msi	3_Junction_66271_Junction_66277_Junction_66281	3_Junction_66271_Junction_66277_Junction_66281	J003	0.0311565	1.66444	0.197005	0.486687	9.6339	10.4485	0.330688	chr3R	21344194	21344981	788	+	38	48	79	63	0.1689	0.2222	0.3038	0.2218	-0.06725
RYa-R	3_Junction_67619_Junction_67621	3_Junction_67619_Junction_67621	J001	0.0873866	5.04489	0.0246987	0.122117	8.79106	10.5944	0.745573	chr3R	22882773	22883103	331	+	121	60	24	32	0.6505	0.4444	0.8	0.8	-0.25255
RYa-R	3_Junction_67619_Junction_67621	3_Junction_67619_Junction_67621	J002	0.0881272	5.01697	0.0251001	0.123438	8.04579	6.1776	-0.925345	chr3R	22882843	22883103	261	+	65	75	6	8	0.3495	0.5556	0.2	0.2	0.25255
CG1646	3_Junction_69448_Junction_69452	3_Junction_69448_Junction_69452	J001	0.0314468	33.3502	7.69694e-09	4.33762e-07	4.6488	7.47067	1.58074	chr3R	24639728	24640868	1141	+	8	9	29	22	0.2857	0.3462	0.8788	0.9565	-0.6017
CG1646	3_Junction_69448_Junction_69452	3_Junction_69448_Junction_69452	J002	0.0340924	32.646	1.10564e-08	5.98949e-07	6.54371	2.60094	-2.88828	chr3R	24640560	24640868	309	+	20	17	4	1	0.7143	0.6538	0.1212	0.0435	0.6017
Vha100-1	3_Junction_69757_Junction_69760	3_Junction_69757_Junction_69760	J001	0.0630395	4.23904	0.0395045	0.169048	14.1688	12.8277	-0.488319	chr3R	24959151	24960769	1619	+	136	114	206	103	0.8344	0.8769	0.7833	0.6398	0.1441
Vha100-1	3_Junction_69757_Junction_69760	3_Junction_69757_Junction_69760	J002	0.0644616	4.16898	0.0411706	0.174099	7.75882	9.2211	0.647912	chr3R	24960320	24960769	450	+	27	16	57	58	0.1656	0.1231	0.2167	0.3602	-0.1441
brat	3_Junction_7092_Junction_7096_Junction_7099	3_Junction_7092_Junction_7096_Junction_7099	J001	0.0421256	9.12013	0.00252812	0.022265	5.31172	2.76491	-2.01365	chr2L	19145844	19166083	20240	+	15	11	3	2	0.3191	0.2115	0.0732	0.0526	0.2024
brat	3_Junction_7092_Junction_7096_Junction_7099	3_Junction_7092_Junction_7096_Junction_7099	J002	0.0190501	0.41556	0.519161	0.817914	6.28504	5.9362	-0.191218	chr2L	19158755	19166083	7329	+	17	21	15	11	0.3617	0.4038	0.3659	0.2895	0.05505
brat	3_Junction_7092_Junction_7096_Junction_7099	3_Junction_7092_Junction_7096_Junction_7099	J003	0.0217044	7.89749	0.00495035	0.037378	6.06926	7.67413	0.812636	chr2L	19165988	19166083	96	+	15	20	23	25	0.3191	0.3846	0.561	0.6579	-0.2576
Ef1alpha100E	3_Junction_71611_Junction_71614	3_Junction_71611_Junction_71614	J001	0.011082	6.64383	0.00995	0.0633883	8.35614	6.56222	-0.860779	chr3R	27564251	27565497	1247	+	10	12	47	67	0.2326	0.3	0.1451	0.1316	0.12795
Ef1alpha100E	3_Junction_71611_Junction_71614	3_Junction_71611_Junction_71614	J002	0.0102084	6.75698	0.00933817	0.0602762	11.9711	12.8609	0.332201	chr3R	27565431	27565497	67	+	33	28	277	442	0.7674	0.7	0.8549	0.8684	-0.12795
faf	3_Junction_71703_Junction_71705	3_Junction_71703_Junction_71705	J001	0.0267042	14.6337	0.000130557	0.00204463	9.4661	11.3447	0.751522	chr3R	27613919	27615217	1299	+	52	39	68	96	0.4952	0.5652	0.7473	0.8348	-0.26085
faf	3_Junction_71703_Junction_71705	3_Junction_71703_Junction_71705	J002	0.0277305	14.3371	0.000152827	0.0023262	9.13262	6.7934	-1.07983	chr3R	27614566	27615217	652	+	53	30	23	19	0.5048	0.4348	0.2527	0.1652	0.26085
spartin	3_Junction_73479_Junction_73483	3_Junction_73479_Junction_73483	J001	0.0236734	42.5786	6.7898e-11	6.28388e-09	7.71308	9.82022	0.918732	chr3R	480801	481238	438	+	20	23	61	72	0.5263	0.6053	0.9683	0.973	-0.40485
spartin	3_Junction_73479_Junction_73483	3_Junction_73479_Junction_73483	J002	0.0294568	40.195	2.29834e-10	1.84842e-08	6.91277	2.07112	-3.75023	chr3R	480992	481238	247	+	18	15	2	2	0.4737	0.3947	0.0317	0.027	0.40485
CG12594	3_Junction_76427_Junction_76430	3_Junction_76427_Junction_76430	J001	0.0154685	8.23148	0.004117	0.0325629	7.34337	5.19089	-1.16791	chr3R	7548074	7552735	4662	+	7	4	25	71	0.7778	0.5714	0.3012	0.31	0.369
CG12594	3_Junction_76427_Junction_76430	3_Junction_76427_Junction_76430	J002	0.014451	8.28937	0.00398778	0.0317318	5.24446	7.35458	1.14019	chr3R	7548179	7552735	4557	+	2	3	58	158	0.2222	0.4286	0.6988	0.69	-0.369
beat-Vb	3_Junction_77433_Junction_77436	3_Junction_77433_Junction_77436	J001	0.0667772	5.73793	0.0166024	0.0921472	5.85851	4.04225	-1.18347	chr3R	8741865	8744164	2300	+	18	18	8	2	0.2	0.3158	0.1194	0.0465	0.17495
beat-Vb	3_Junction_77433_Junction_77436	3_Junction_77433_Junction_77436	J002	0.0595482	6.0371	0.0140082	0.0814292	9.18242	10.495	0.538272	chr3R	8742126	8744164	2039	+	72	39	59	41	0.8	0.6842	0.8806	0.9535	-0.17495
rin	3_Junction_77962_Junction_77964	3_Junction_77962_Junction_77964	J001	0.0415738	4.3484	0.0370438	0.161553	7.82837	6.53277	-0.636097	chr3R	9472922	9474638	1717	+	26	21	26	19	0.3939	0.5833	0.3059	0.2603	0.2055
rin	3_Junction_77962_Junction_77964	3_Junction_77962_Junction_77964	J002	0.0397666	4.44016	0.035103	0.155382	8.28205	9.40833	0.487469	chr3R	9473268	9474638	1371	+	40	15	59	54	0.6061	0.4167	0.6941	0.7397	-0.2055
B52	3_Junction_78017_Junction_78023	3_Junction_78017_Junction_78023	J001	0.00861408	46.5471	8.94413e-12	9.8652e-10	13.8535	16.1558	0.817024	chr3R	9488773	9491173	2401	+	156	115	422	181	0.4205	0.3674	0.6862	0.6606	-0.27945
B52	3_Junction_78017_Junction_78023	3_Junction_78017_Junction_78023	J002	0.00863491	46.4777	9.2666e-12	1.01686e-09	15.5787	13.1518	-0.870078	chr3R	9490656	9491173	518	+	215	198	193	93	0.5795	0.6326	0.3138	0.3394	0.27945
pan	3_Junction_79102_Junction_79218	3_Junction_79102_Junction_79218	J001	0.220772	11.8622	0.000572841	0.00678291	13.8825	9.12241	-1.84044	chr4	107792	115047	7256	+	325	196	36	15	0.7701	0.7341	0.36	0.0949	0.52465
pan	3_Junction_79102_Junction_79218	3_Junction_79102_Junction_79218	J002	0.22142	11.8295	0.000582987	0.00687696	9.64207	14.4652	1.83191	chr4	113899	115047	1149	+	97	71	64	143	0.2299	0.2659	0.64	0.9051	-0.52465
CaMKI	3_Junction_81132_Junction_81134	3_Junction_81132_Junction_81134	J001	0.020113	5.40423	0.020088	0.105488	7.82502	6.37884	-0.715636	chr4	467373	467445	73	+	17	16	17	43	0.2656	0.1928	0.1037	0.1356	0.10955
CaMKI	3_Junction_81132_Junction_81134	3_Junction_81132_Junction_81134	J002	0.0180648	5.60398	0.0179198	0.0974326	12.2114	13.0126	0.2976	chr4	467377	467445	69	+	47	67	147	274	0.7344	0.8072	0.8963	0.8644	-0.10955
Uhg3	3_Junction_8115_Junction_8117	3_Junction_8115_Junction_8117	J001	0.167374	12.8889	0.000330528	0.0043406	7.56953	11.4131	1.61768	chr2L	20647788	20648187	400	+	16	10	177	153	0.106	0.0709	0.6413	0.3415	-0.40295
Uhg3	3_Junction_8115_Junction_8117	3_Junction_8115_Junction_8117	J002	0.166645	12.9393	0.000321758	0.00424614	16.2437	12.1449	-1.4768	chr2L	20648013	20648187	175	+	135	131	99	295	0.894	0.9291	0.3587	0.6585	0.40295
CG1909	3_Junction_81397_Junction_81399	3_Junction_81397_Junction_81399	J001	0.0126791	15.3944	8.7248e-05	0.00145976	13.3105	12.2914	-0.376815	chr4	604644	605386	743	+	110	75	124	167	0.9402	0.9494	0.8	0.8227	0.13345
CG1909	3_Junction_81397_Junction_81399	3_Junction_81397_Junction_81399	J002	0.0145078	14.8844	0.000114307	0.00182931	4.48767	7.21342	1.56756	chr4	604667	605386	720	+	7	4	31	36	0.0598	0.0506	0.2	0.1773	-0.13345
CR44030	3_Junction_81980_Junction_81988	3_Junction_81980_Junction_81988	J001	0.023398	6.20721	0.0127231	0.0759393	10.4933	11.666	0.456443	chr4	980664	983025	2362	+	54	35	111	134	0.5243	0.4667	0.7161	0.6262	-0.17565
CR44030	3_Junction_81980_Junction_81988	3_Junction_81980_Junction_81988	J002	0.0237325	6.15973	0.0130691	0.0773589	10.509	9.21943	-0.52817	chr4	980749	983025	2277	+	49	40	44	80	0.4757	0.5333	0.2839	0.3738	0.17565
NONE	3_Junction_82019_Junction_82261	3_Junction_82019_Junction_82261	J001	0.201258	16.6798	4.42506e-05	0.00083606	10.587	4.95947	-2.71767	chrM	1044	4532	3489	+	44	296	2	5	0.4272	0.7475	0.0645	0.0568	0.5267
NONE	3_Junction_82019_Junction_82261	3_Junction_82019_Junction_82261	J002	0.201918	16.6353	4.52995e-05	0.000852197	7.88717	14.0306	2.44037	chrM	1729	4532	2804	+	59	100	29	83	0.5728	0.2525	0.9355	0.9432	-0.5267
NONE	3_Junction_82091_Junction_82542_Junction_82649	3_Junction_82091_Junction_82542_Junction_82649	J001	1.17517	0.0253752	0.873436	0.983265	21.0508	30.5704	3.19063	chrM	12781	12819	39	+	4483	1883	34	4137	0.9792	0.9401	0.6182	0.9954	0.15285
NONE	3_Junction_82091_Junction_82542_Junction_82649	3_Junction_82091_Junction_82542_Junction_82649	J002	1.28418	0.11578	0.733658	0.938017	6.74622	10.728	1.75556	chrM	6773	12819	6047	+	38	101	20	17	0.0083	0.0504	0.3636	0.0041	-0.1545
NONE	3_Junction_82091_Junction_82542_Junction_82649	3_Junction_82091_Junction_82542_Junction_82649	J003	0.0870422	13.128	0.000290909	0.00392431	5.04568	3.78163	-0.902355	chrM	9836	12819	2984	+	57	19	1	2	0.0125	0.0095	0.0182	0.0005	0.00165
NONE	3_Junction_82338_Junction_82368_Junction_82519	3_Junction_82338_Junction_82368_Junction_82519	J001	0.390359	5.10032	0.0239215	0.11942	3.78346	6.61831	1.79777	chrM	2727	12862	10136	+	15	22	5	6	0.1429	0.018	0.3571	0.375	-0.2856
NONE	3_Junction_82338_Junction_82368_Junction_82519	3_Junction_82338_Junction_82368_Junction_82519	J002	0.929401	0.110571	0.739495	0.939929	4.77744	4.66606	-0.074674	chrM	3187	12862	9676	+	46	18	3	2	0.4381	0.0147	0.2143	0.125	0.05675
NONE	3_Junction_82338_Junction_82368_Junction_82519	3_Junction_82338_Junction_82368_Junction_82519	J003	0.8144	1.06347	0.302425	0.623813	14.8028	7.31932	-2.985	chrM	597	12862	12266	+	44	1184	6	8	0.419	0.9673	0.4286	0.5	0.22885
CG9328	3_Junction_8249_Junction_8259	3_Junction_8249_Junction_8259	J001	0.00495467	26.372	2.81598e-07	1.05363e-05	13.0922	14.6465	0.561865	chr2L	20798514	20813154	14641	+	169	164	168	109	0.4333	0.4373	0.6462	0.6193	-0.19745
CG9328	3_Junction_8249_Junction_8259	3_Junction_8249_Junction_8259	J002	0.00495541	26.3703	2.81834e-07	1.05363e-05	14.1259	12.4504	-0.612889	chr2L	20810373	20813154	2782	+	221	211	92	67	0.5667	0.5627	0.3538	0.3807	0.19745
dlg1	3_Junction_84404_Junction_84409_Junction_84421	3_Junction_84404_Junction_84409_Junction_84421	J001	0.0620914	4.52977	0.03331	0.150191	14.2951	11.9781	-0.850943	chrX	11263832	11267848	4017	+	56	88	155	274	0.6914	0.8544	0.5849	0.6157	0.1726
dlg1	3_Junction_84404_Junction_84409_Junction_84421	3_Junction_84404_Junction_84409_Junction_84421	J002	0.140068	0.159433	0.689679	0.920649	4.79629	4.5756	-0.148916	chrX	11263836	11267848	4013	+	6	2	21	17	0.0741	0.0194	0.0792	0.0382	-0.01195
dlg1	3_Junction_84404_Junction_84409_Junction_84421	3_Junction_84404_Junction_84409_Junction_84421	J003	0.0183696	10.1138	0.00147161	0.0144258	8.63565	9.87739	0.524804	chrX	11267122	11267848	727	+	19	13	89	154	0.2346	0.1262	0.3358	0.3461	-0.16055
Ten-a	3_Junction_85016_Junction_85276	3_Junction_85016_Junction_85276	J001	0.237954	24.717	6.63963e-07	2.19438e-05	7.91347	2.48528	-3.693	chrX	11782277	12028006	245730	+	29	10	2	5	0.7436	0.3704	0.011	0.0259	0.53855
Ten-a	3_Junction_85016_Junction_85276	3_Junction_85016_Junction_85276	J002	0.223054	26.0325	3.35718e-07	1.22244e-05	6.94214	12.901	2.48277	chrX	11984288	12028006	43719	+	10	17	180	188	0.2564	0.6296	0.989	0.9741	-0.53855
Nhe2	3_Junction_8550_Junction_8551	3_Junction_8550_Junction_8551	J001	0.0111776	26.8142	2.23986e-07	8.63424e-06	8.63352	10.7497	0.87562	chr2L	21121739	21122249	511	+	50	34	75	44	0.4237	0.4359	0.7732	0.7333	-0.32345
Nhe2	3_Junction_8550_Junction_8551	3_Junction_8550_Junction_8551	J002	0.0113763	26.6611	2.42448e-07	9.2518e-06	9.60393	6.98413	-1.18158	chr2L	21121769	21122249	481	+	68	44	22	16	0.5763	0.5641	0.2268	0.2667	0.32345
Tomosyn	3_Junction_85878_Junction_85885	3_Junction_85878_Junction_85885	J001	0.134938	6.14073	0.0132103	0.0779852	9.99077	7.74047	-0.975576	chrX	12538800	12545141	6342	+	67	54	16	34	0.5317	0.6923	0.1778	0.3864	0.3299
Tomosyn	3_Junction_85878_Junction_85885	3_Junction_85878_Junction_85885	J002	0.134511	6.15687	0.0130903	0.0774071	8.63129	10.9018	0.936313	chrX	12542816	12545141	2326	+	59	24	74	54	0.4683	0.3077	0.8222	0.6136	-0.3299
fne	3_Junction_86281_Junction_86282	3_Junction_86281_Junction_86282	J001	0.0581783	9.02303	0.002666	0.0232147	16.8364	14.657	-0.765656	chrX	12836880	12837117	238	+	241	181	343	214	0.713	0.6606	0.5097	0.3474	0.25825
fne	3_Junction_86281_Junction_86282	3_Junction_86281_Junction_86282	J002	0.0581986	9.02013	0.00267022	0.02324	13.6175	15.8081	0.780792	chrX	12836889	12837117	229	+	97	93	330	402	0.287	0.3394	0.4903	0.6526	-0.25825
CG1640	3_Junction_86795_Junction_86823	3_Junction_86795_Junction_86823	J001	0.0762609	4.86116	0.0274678	0.131577	7.7052	6.23383	-0.737456	chrX	13265400	13267894	2495	+	17	15	37	20	0.85	0.7143	0.5968	0.4082	0.27965
CG1640	3_Junction_86795_Junction_86823	3_Junction_86795_Junction_86823	J002	0.0788168	4.78514	0.0287063	0.135425	4.46448	6.10961	1.01391	chrX	13266679	13267894	1216	+	3	6	25	29	0.15	0.2857	0.4032	0.5918	-0.27965
rdgB	3_Junction_87389_Junction_87391	3_Junction_87389_Junction_87391	J001	0.0270362	14.3948	0.000148215	0.00226753	6.64931	4.21052	-1.48364	chrX	13656901	13661818	4918	+	8	8	20	13	0.8889	0.6667	0.2703	0.2889	0.4982
rdgB	3_Junction_87389_Junction_87391	3_Junction_87389_Junction_87391	J002	0.0243099	14.6685	0.000128168	0.00201607	3.95776	6.4495	1.5711	chrX	13656978	13661818	4841	+	1	4	54	32	0.1111	0.3333	0.7297	0.7111	-0.4982
crc	3_Junction_8787_Junction_8790	3_Junction_8787_Junction_8790	J001	0.0986403	67.2973	2.33506e-16	5.50955e-14	19.0117	27.3317	2.80192	chr2L	21312208	21318125	5918	+	998	863	1693	2464	0.8331	0.781	0.9947	0.9988	-0.1897
crc	3_Junction_8787_Junction_8790	3_Junction_8787_Junction_8790	J002	0.0997547	66.6631	3.22101e-16	7.35737e-14	13.1547	5.11553	-3.59375	chr2L	21315538	21318125	2588	+	200	242	9	3	0.1669	0.219	0.0053	0.0012	0.1897
dpr8	3_Junction_88940_Junction_88943	3_Junction_88940_Junction_88943	J001	0.0105452	4.49252	0.0340434	0.152272	9.05418	9.95589	0.375848	chrX	14216948	14249494	32547	+	53	53	33	52	0.5096	0.4732	0.6226	0.6341	-0.13695
dpr8	3_Junction_88940_Junction_88943	3_Junction_88940_Junction_88943	J002	0.010652	4.47854	0.0343231	0.153003	9.18688	8.16426	-0.447241	chrX	14218891	14249494	30604	+	51	59	20	30	0.4904	0.5268	0.3774	0.3659	0.13695
shi	3_Junction_91624_Junction_91627_Junction_91628_Junction_91630_Junction_91631	3_Junction_91624_Junction_91627_Junction_91628_Junction_91630_Junction_91631	J001	0.325485	1.01834	0.312913	0.635817	8.43117	11.8458	1.38819	chrX	15786284	15786859	576	+	30	53	126	24	0.0679	0.1216	0.3841	0.0836	-0.1391
shi	3_Junction_91624_Junction_91627_Junction_91628_Junction_91630_Junction_91631	3_Junction_91624_Junction_91627_Junction_91628_Junction_91630_Junction_91631	J002	0.119822	4.25165	0.0392121	0.168166	6.18594	9.69227	1.63318	chrX	15786450	15786859	410	+	23	17	25	56	0.052	0.039	0.0762	0.1951	-0.09015
shi	3_Junction_91624_Junction_91627_Junction_91628_Junction_91630_Junction_91631	3_Junction_91624_Junction_91627_Junction_91628_Junction_91630_Junction_91631	J003	0.0942277	2.35623	0.124784	0.365588	15.8605	14.9135	-0.334094	chrX	15786473	15786859	387	+	301	306	134	185	0.681	0.7018	0.4085	0.6446	0.16485
shi	3_Junction_91624_Junction_91627_Junction_91628_Junction_91630_Junction_91631	3_Junction_91624_Junction_91627_Junction_91628_Junction_91630_Junction_91631	J004	0.0692637	1.39933	0.236836	0.542868	9.57645	8.33915	-0.531993	chrX	15786602	15786859	258	+	77	44	36	19	0.1742	0.1009	0.1098	0.0662	0.04955
shi	3_Junction_91624_Junction_91627_Junction_91628_Junction_91630_Junction_91631	3_Junction_91624_Junction_91627_Junction_91628_Junction_91630_Junction_91631	J005	0.0302194	2.23951	0.134524	0.383824	5.22878	3.99573	-0.847549	chrX	15786614	15786859	246	+	11	16	7	3	0.0249	0.0367	0.0213	0.0105	0.0149
NONE	3_Junction_93335_Junction_93337	3_Junction_93335_Junction_93337	J001	0.0247628	4.00943	0.0452464	0.185414	5.16107	6.49454	0.759792	chrX	16794185	16800250	6066	+	10	25	10	12	0.125	0.1908	0.2941	0.3	-0.13915
NONE	3_Junction_93335_Junction_93337	3_Junction_93335_Junction_93337	J002	0.0215173	4.16433	0.0412837	0.174411	9.94874	9.14994	-0.332149	chrX	16795756	16800250	4495	+	70	106	24	28	0.875	0.8092	0.7059	0.7	0.13915
CG12991	3_Junction_94052_Junction_94053	3_Junction_94052_Junction_94053	J001	0.0801058	6.98687	0.00821096	0.0549165	9.60222	7.48073	-0.938652	chrX	17492217	17492299	83	+	55	53	18	28	0.44	0.53	0.1488	0.3043	0.25845
CG12991	3_Junction_94052_Junction_94053	3_Junction_94052_Junction_94053	J002	0.0790171	7.06216	0.00787288	0.053304	9.84388	11.9017	0.808104	chrX	17492223	17492299	77	+	70	47	103	64	0.56	0.47	0.8512	0.6957	-0.25845
Hers	3_Junction_97419_Junction_97437	3_Junction_97419_Junction_97437	J001	0.421755	10.915	0.000953868	0.010198	11.7269	6.65072	-2.19131	chrX	19766477	19794647	28171	+	81	52	41	11	0.9	0.9811	0.5325	0.1642	0.5922
Hers	3_Junction_97419_Junction_97437	3_Junction_97419_Junction_97437	J002	0.428157	10.776	0.00102826	0.0108334	4.08126	8.44253	2.43445	chrX	19787990	19794647	6658	+	9	1	36	56	0.1	0.0189	0.4675	0.8358	-0.5922
Pdfr	3_Junction_99288_Junction_99293	3_Junction_99288_Junction_99293	J001	0.00325121	42.2891	7.87321e-11	7.19355e-09	16.6218	18.0648	0.49856	chrX	2470417	2471624	1208	+	342	431	407	242	0.4893	0.5035	0.6829	0.676	-0.18305
Pdfr	3_Junction_99288_Junction_99293	3_Junction_99288_Junction_99293	J002	0.00325859	42.2431	8.06058e-11	7.3439e-09	16.6651	14.9442	-0.604025	chrX	2470746	2471624	879	+	357	425	189	116	0.5107	0.4965	0.3171	0.324	0.18305
sgg	3_Junction_99407_Junction_99425_Junction_99450	3_Junction_99407_Junction_99425_Junction_99450	J001	0.0576324	11.6572	0.00063955	0.00740535	3.60813	6.60712	1.93709	chrX	2528058	2535621	7564	+	3	6	12	29	0.0682	0.1538	0.3333	0.4833	-0.2973
sgg	3_Junction_99407_Junction_99425_Junction_99450	3_Junction_99407_Junction_99425_Junction_99450	J002	0.0740037	6.97899	0.0082472	0.0550788	2.71864	5.12016	1.94548	chrX	2531344	2535621	4278	+	2	3	12	11	0.0455	0.0769	0.3333	0.1833	-0.1971
sgg	3_Junction_99407_Junction_99425_Junction_99450	3_Junction_99407_Junction_99425_Junction_99450	J003	0.0268877	30.5736	3.21434e-08	1.54169e-06	8.70069	5.93112	-1.3534	chrX	2535394	2535621	228	+	39	30	12	20	0.8864	0.7692	0.3333	0.3333	0.4945
CG3625	5_Junction_10136_Junction_10137_Junction_10138	5_Junction_10136_Junction_10137_Junction_10138	J001	0.0424842	30.295	3.71089e-08	1.75116e-06	15.3005	12.5468	-0.995399	chr2L	284968	285431	464	-	135	122	209	158	0.3222	0.3104	0.1007	0.0586	0.23665
CG3625	5_Junction_10136_Junction_10137_Junction_10138	5_Junction_10136_Junction_10137_Junction_10138	J002	0.0289515	48.0828	4.08588e-12	4.75927e-10	7.44532	2.96598	-2.94634	chr2L	284968	286305	1338	-	16	14	2	9	0.0382	0.0356	0.001	0.0033	0.03475
CG3625	5_Junction_10136_Junction_10137_Junction_10138	5_Junction_10136_Junction_10137_Junction_10138	J003	0.03655	40.376	2.09497e-10	1.71034e-08	18.2752	22.8874	1.56426	chr2L	284968	290811	5844	-	268	257	1864	2531	0.6396	0.6539	0.8983	0.9381	-0.27145
CG44774	5_Junction_104738_Junction_104742	5_Junction_104738_Junction_104742	J001	0.0342041	51.7102	6.4329e-13	8.56134e-11	3.42301	8.97187	3.20411	chrX	4824098	4825030	933	-	5	1	73	48	0.0309	0.0083	0.2786	0.3609	-0.30015
CG44774	5_Junction_104738_Junction_104742	5_Junction_104738_Junction_104742	J002	0.0318472	53.4677	2.6288e-13	3.71178e-11	15.043	11.8989	-1.14743	chrX	4824098	4832006	7909	-	157	119	189	85	0.9691	0.9917	0.7214	0.6391	0.30015
RpL36	5_Junction_105337_Junction_105338_Junction_105339_Junction_105341	5_Junction_105337_Junction_105338_Junction_105339_Junction_105341	J001	0.0085196	0.186582	0.665776	0.909491	7.75332	8.08522	0.152891	chrX	522911	523357	447	-	17	21	35	56	0.0138	0.0143	0.0147	0.0162	-0.0014
RpL36	5_Junction_105337_Junction_105338_Junction_105339_Junction_105341	5_Junction_105337_Junction_105338_Junction_105339_Junction_105341	J002	0.00357829	29.0919	6.90256e-08	3.03911e-06	21.0116	22.1595	0.387613	chrX	522911	523359	449	-	507	635	1287	1944	0.4102	0.4329	0.5398	0.5628	-0.12975
RpL36	5_Junction_105337_Junction_105338_Junction_105339_Junction_105341	5_Junction_105337_Junction_105338_Junction_105339_Junction_105341	J003	0.0411609	1.74959	0.185929	0.469925	6.76221	5.33833	-0.789142	chrX	522911	523379	469	-	10	17	19	15	0.0081	0.0116	0.008	0.0043	0.0037
RpL36	5_Junction_105337_Junction_105338_Junction_105339_Junction_105341	5_Junction_105337_Junction_105338_Junction_105339_Junction_105341	J004	0.00371997	27.2254	1.81067e-07	7.09442e-06	22.1571	21.0275	-0.381432	chrX	522911	523413	503	-	702	794	1043	1439	0.568	0.5412	0.4375	0.4166	0.12755
MAPk-Ak2	5_Junction_105908_Junction_105909	5_Junction_105908_Junction_105909	J001	0.0150684	5.89245	0.0152059	0.0866024	7.66669	6.19414	-0.740875	chrX	5656714	5658100	1387	-	22	22	14	26	0.2588	0.2444	0.1167	0.1585	0.114
MAPk-Ak2	5_Junction_105908_Junction_105909	5_Junction_105908_Junction_105909	J002	0.0135625	6.0857	0.013628	0.079738	11.4284	12.195	0.291118	chrX	5656714	5658125	1412	-	63	68	106	138	0.7412	0.7556	0.8833	0.8415	-0.114
CG43867	5_Junction_108007_Junction_108009	5_Junction_108007_Junction_108009	J001	0.0508543	44.7498	2.23885e-11	2.32602e-09	3.40325	8.3757	2.96104	chrX	716002	730057	14056	-	2	3	72	47	0.0541	0.1071	0.6792	0.7966	-0.6573
CG43867	5_Junction_108007_Junction_108009	5_Junction_108007_Junction_108009	J002	0.0512317	44.5977	2.41977e-11	2.47956e-09	9.81525	5.64116	-1.98983	chrX	716002	737143	21142	-	35	25	34	12	0.9459	0.8929	0.3208	0.2034	0.6573
CG18624	5_Junction_108317_Junction_108318	5_Junction_108317_Junction_108318	J001	0.0652586	12.9352	0.000322464	0.0042503	6.39725	9.2489	1.33473	chrX	7787523	7787619	97	-	26	13	57	24	0.1204	0.073	0.3986	0.2609	-0.23305
CG18624	5_Junction_108317_Junction_108318	5_Junction_108317_Junction_108318	J002	0.0623305	13.39	0.000252972	0.00349472	14.1071	11.5856	-0.932576	chrX	7787523	7787781	259	-	190	165	86	68	0.8796	0.927	0.6014	0.7391	0.23305
fs(1)h	5_Junction_108601_Junction_108616	5_Junction_108601_Junction_108616	J001	0.0272766	31.8803	1.63968e-08	8.48339e-07	11.212	13.1666	0.734907	chrX	7932416	7944733	12318	-	84	96	87	127	0.8077	0.7328	0.9775	0.9769	-0.20695
fs(1)h	5_Junction_108601_Junction_108616	5_Junction_108601_Junction_108616	J002	0.0312122	30.3396	3.62652e-08	1.71386e-06	7.2285	2.82581	-2.98645	chrX	7932416	8346964	414549	-	20	35	2	3	0.1923	0.2672	0.0225	0.0231	0.20695
lawc	5_Junction_109568_Junction_109570	5_Junction_109568_Junction_109570	J001	0.0231897	5.2813	0.0215557	0.110742	8.45679	9.74653	0.549936	chrX	8302811	8303434	624	-	37	19	63	65	0.245	0.1624	0.358	0.3081	-0.12935
lawc	5_Junction_109568_Junction_109570	5_Junction_109568_Junction_109570	J002	0.0223165	5.39182	0.0202313	0.105984	13.3366	12.36	-0.360679	chrX	8302811	8303694	884	-	114	98	113	146	0.755	0.8376	0.642	0.6919	0.12935
Lim1	5_Junction_110431_Junction_110432	5_Junction_110431_Junction_110432	J001	0.013576	29.9857	4.35242e-08	2.00398e-06	10.2082	12.2356	0.785976	chrX	8662975	8679215	16241	-	66	48	131	75	0.569	0.5	0.8452	0.8242	-0.3002
Lim1	5_Junction_110431_Junction_110432	5_Junction_110431_Junction_110432	J002	0.0141902	29.4676	5.68583e-08	2.55581e-06	9.68857	6.69579	-1.36252	chrX	8662975	8681641	18667	-	50	48	24	16	0.431	0.5	0.1548	0.1758	0.3002
Moe	5_Junction_110669_Junction_110671_Junction_110672	5_Junction_110669_Junction_110671_Junction_110672	J001	0.166077	24.4151	7.76561e-07	2.51238e-05	10.7425	2.4899	-4.88362	chrX	8774433	8785593	11161	-	31	45	6	2	0.3333	0.4412	0.042	0.0068	0.36285
Moe	5_Junction_110669_Junction_110671_Junction_110672	5_Junction_110669_Junction_110671_Junction_110672	J002	0.0102168	14.0628	0.00017681	0.00261577	7.12619	8.6902	0.722799	chrX	8774433	8791870	17438	-	13	13	40	90	0.1398	0.1275	0.2797	0.3061	-0.15925
Moe	5_Junction_110669_Junction_110671_Junction_110672	5_Junction_110669_Junction_110671_Junction_110672	J003	0.0124363	13.0279	0.000306885	0.00409882	11.4311	11.664	0.0891595	chrX	8774433	8792215	17783	-	49	44	97	202	0.5269	0.4314	0.6783	0.6871	-0.20355
NONE	5_Junction_111479_Junction_111480	5_Junction_111479_Junction_111480	J001	0.016385	26.9222	2.11812e-07	8.20917e-06	5.47133	9.61941	2.00909	chrX	9513	17949	8437	-	1	4	266	215	0.0625	0.2	0.641	0.5923	-0.4854
NONE	5_Junction_111479_Junction_111480	5_Junction_111479_Junction_111480	J002	0.0166025	26.8505	2.19819e-07	8.49043e-06	11.1721	8.02375	-1.31338	chrX	9513	18005	8493	-	15	16	149	148	0.9375	0.8	0.359	0.4077	0.4854
nej	5_Junction_111540_Junction_111543	5_Junction_111540_Junction_111543	J001	0.159458	5.3184	0.0211014	0.109024	5.5498	7.76211	1.14953	chrX	9578184	9579534	1351	-	10	13	11	49	0.4167	0.5	0.6471	0.9074	-0.3189
nej	5_Junction_111540_Junction_111543	5_Junction_111540_Junction_111543	J002	0.168529	5.10508	0.0238559	0.119185	5.93245	3.64703	-1.54118	chrX	9578184	9581010	2827	-	14	13	6	5	0.5833	0.5	0.3529	0.0926	0.3189
Clect27	5_Junction_11516_Junction_11518	5_Junction_11516_Junction_11518	J001	0.0759537	48.4278	3.42677e-12	4.05013e-10	8.07732	2.13498	-4.21673	chr2L	4798393	4876676	78284	-	12	22	5	1	0.5714	0.7857	0.0316	0.0244	0.65055
Clect27	5_Junction_11516_Junction_11518	5_Junction_11516_Junction_11518	J002	0.0640299	52.7811	3.7287e-13	5.16517e-11	5.69923	9.88147	1.9833	chr2L	4798393	5402027	603635	-	9	6	153	40	0.4286	0.2143	0.9684	0.9756	-0.65055
Nckx30C	5_Junction_15594_Junction_15595	5_Junction_15594_Junction_15595	J001	0.00870858	5.56963	0.0182746	0.0987947	13.642	14.4672	0.297185	chr2L	9727256	9732914	5659	-	276	233	129	71	0.4623	0.5032	0.5708	0.6174	-0.11135
Nckx30C	5_Junction_15594_Junction_15595	5_Junction_15594_Junction_15595	J002	0.00871112	5.56882	0.0182831	0.0988307	13.9409	13.0735	-0.31571	chr2L	9727256	9732953	5698	-	321	230	97	44	0.5377	0.4968	0.4292	0.3826	0.11135
Rcd1	5_Junction_16126_Junction_16127	5_Junction_16126_Junction_16127	J001	0.0722896	6.68784	0.00970725	0.0621416	3.89199	5.58239	1.14133	chr2R	10039431	10039567	137	-	9	3	13	12	0.3913	0.1875	0.7647	0.6	-0.39295
Rcd1	5_Junction_16126_Junction_16127	5_Junction_16126_Junction_16127	J002	0.0704607	6.74895	0.00938029	0.0604525	5.65881	4.00354	-1.09881	chr2R	10039431	10040349	919	-	14	13	4	8	0.6087	0.8125	0.2353	0.4	0.39295
Opa1	5_Junction_16236_Junction_16237	5_Junction_16236_Junction_16237	J001	0.0132385	20.572	5.74286e-06	0.000145283	6.85996	9.36026	1.14227	chr2R	10119469	10120219	751	-	26	22	52	27	0.1985	0.1746	0.4685	0.403	-0.2492
Opa1	5_Junction_16236_Junction_16237	5_Junction_16236_Junction_16237	J002	0.0125099	21.014	4.55944e-06	0.000118547	11.8386	10.1551	-0.657615	chr2R	10119469	10120228	760	-	105	104	59	40	0.8015	0.8254	0.5315	0.597	0.2492
CG10151	5_Junction_16657_Junction_16658	5_Junction_16657_Junction_16658	J001	0.0256667	6.97567	0.00826253	0.0551343	8.28107	9.63196	0.581005	chr2R	10641395	10641454	60	-	30	24	62	59	0.4478	0.4444	0.6019	0.7195	-0.2146
CG10151	5_Junction_16657_Junction_16658	5_Junction_16657_Junction_16658	J002	0.0261141	6.92048	0.00852141	0.0564884	8.99141	7.53808	-0.653981	chr2R	10641395	10641490	96	-	37	30	41	23	0.5522	0.5556	0.3981	0.2805	0.2146
Vha44	5_Junction_18125_Junction_18127	5_Junction_18125_Junction_18127	J001	0.0142021	14.5575	0.000135943	0.00211207	9.46629	11.3637	0.758782	chr2R	12214665	12216056	1392	-	37	48	102	74	0.1217	0.1491	0.2446	0.2972	-0.1355
Vha44	5_Junction_18125_Junction_18127	5_Junction_18125_Junction_18127	J002	0.0138153	14.7844	0.000120531	0.00191261	16.6352	15.383	-0.438368	chr2R	12214665	12220537	5873	-	267	274	315	175	0.8783	0.8509	0.7554	0.7028	0.1355
Pino	5_Junction_1848_Junction_1849	5_Junction_1848_Junction_1849	J001	0.0941403	18.7344	1.50245e-05	0.000330981	8.00868	4.28507	-2.08766	chr2L	1117516	1118564	1049	-	47	60	5	3	0.5109	0.7143	0.0962	0.1429	0.49305
Pino	5_Junction_1848_Junction_1849	5_Junction_1848_Junction_1849	J002	0.093873	18.7687	1.47571e-05	0.000326093	6.62757	10.1702	1.59415	chr2L	1117516	1128127	10612	-	45	24	47	18	0.4891	0.2857	0.9038	0.8571	-0.49305
unc-104	5_Junction_18668_Junction_18669	5_Junction_18668_Junction_18669	J001	0.0145994	5.1682	0.0230041	0.116155	12.3393	13.3043	0.356637	chr2R	12651879	12652831	953	-	141	105	65	155	0.4006	0.3302	0.5039	0.4697	-0.1214
unc-104	5_Junction_18668_Junction_18669	5_Junction_18668_Junction_18669	J002	0.0145164	5.18631	0.0227655	0.115221	14.5238	13.6373	-0.319112	chr2R	12651879	12653336	1458	-	211	213	64	175	0.5994	0.6698	0.4961	0.5303	0.1214
lolal	5_Junction_19941_Junction_19942_Junction_19943	5_Junction_19941_Junction_19942_Junction_19943	J001	0.0611289	0.123979	0.724758	0.936031	7.54958	6.61545	-0.462331	chr2R	14043670	14045349	1680	-	22	27	15	25	0.1964	0.314	0.1744	0.2747	0.03065
lolal	5_Junction_19941_Junction_19942_Junction_19943	5_Junction_19941_Junction_19942_Junction_19943	J002	0.0129211	14.5853	0.000133957	0.00208624	8.04602	9.30377	0.550335	chr2R	14043670	14045445	1776	-	32	26	43	52	0.2857	0.3023	0.5	0.5714	-0.2417
lolal	5_Junction_19941_Junction_19942_Junction_19943	5_Junction_19941_Junction_19942_Junction_19943	J003	0.102695	3.77341	0.0520734	0.20408	9.50034	6.72335	-1.27033	chr2R	14043670	14045476	1807	-	58	33	28	14	0.5179	0.3837	0.3256	0.1538	0.2111
CG10527	5_Junction_22173_Junction_22174	5_Junction_22173_Junction_22174	J001	0.0881342	14.5294	0.000137993	0.00214082	14.0867	11.3418	-1.01885	chr2R	16959308	16960228	921	-	58	100	182	134	0.9831	0.9901	0.8878	0.7836	0.1509
CG10527	5_Junction_22173_Junction_22174	5_Junction_22173_Junction_22174	J002	0.0952447	13.9795	0.000184811	0.00270555	2.32775	6.0137	2.93212	chr2R	16959308	16961038	1731	-	1	1	23	37	0.0169	0.0099	0.1122	0.2164	-0.1509
Fkbp14	5_Junction_22654_Junction_22656	5_Junction_22654_Junction_22656	J001	0.0332047	133.129	8.47103e-31	7.27538e-28	13.0397	5.28014	-3.44941	chr2R	17382831	17384567	1737	-	32	49	38	30	0.9143	0.9074	0.105	0.0693	0.8237
Fkbp14	5_Junction_22654_Junction_22656	5_Junction_22654_Junction_22656	J002	0.0317752	136.239	1.76904e-31	1.62787e-28	5.43866	12.9745	3.32947	chr2R	17382831	17385284	2454	-	3	5	324	403	0.0857	0.0926	0.895	0.9307	-0.8237
HmgZ	5_Junction_22869_Junction_22870_Junction_22872	5_Junction_22869_Junction_22870_Junction_22872	J001	0.0582991	0.45054	0.502079	0.806168	7.78326	6.99946	-0.377129	chr2R	17586105	17590176	4072	-	38	13	26	23	0.0499	0.0229	0.0251	0.0301	0.0088
HmgZ	5_Junction_22869_Junction_22870_Junction_22872	5_Junction_22869_Junction_22870_Junction_22872	J002	0.00770019	36.8729	1.26084e-09	8.37275e-08	19.1918	18.1062	-0.371484	chr2R	17586105	17590180	4076	-	579	405	547	416	0.7598	0.7143	0.5285	0.5445	0.20055
HmgZ	5_Junction_22869_Junction_22870_Junction_22872	5_Junction_22869_Junction_22870_Junction_22872	J003	0.0212353	19.5168	9.97195e-06	0.000233746	14.2338	17.2556	1.06224	chr2R	17586105	17591826	5722	-	145	149	462	325	0.1903	0.2628	0.4464	0.4254	-0.20935
Liprin-gamma	5_Junction_23142_Junction_23145	5_Junction_23142_Junction_23145	J001	0.0611723	36.1489	1.82797e-09	1.18101e-07	11.9539	9.4879	-0.974948	chr2R	18232798	18233547	750	-	184	86	42	25	0.9946	0.9885	0.7925	0.641	0.2748
Liprin-gamma	5_Junction_23142_Junction_23145	5_Junction_23142_Junction_23145	J002	0.079352	32.2919	1.32662e-08	7.02161e-07	1.397	6.43886	4.65738	chr2R	18232798	18247757	14960	-	1	1	11	14	0.0054	0.0115	0.2075	0.359	-0.2748
yki	5_Junction_24752_Junction_24753	5_Junction_24752_Junction_24753	J001	0.14022	5.52383	0.0187591	0.100637	9.63779	7.16901	-1.10415	chr2R	19953836	19954082	247	-	48	47	30	18	0.4248	0.4052	0.2542	0.0857	0.24505
yki	5_Junction_24752_Junction_24753	5_Junction_24752_Junction_24753	J002	0.137969	5.60272	0.0179326	0.0974612	10.8821	13.437	0.962224	chr2R	19953836	19954684	849	-	65	69	88	192	0.5752	0.5948	0.7458	0.9143	-0.24505
mim	5_Junction_26414_Junction_26415	5_Junction_26414_Junction_26415	J001	0.189045	8.0617	0.00452108	0.0349983	8.20673	5.07105	-1.64545	chr2R	2821685	2821852	168	-	114	26	9	1	0.5253	0.3059	0.1343	0.0263	0.3353
mim	5_Junction_26414_Junction_26415	5_Junction_26414_Junction_26415	J002	0.186103	8.15431	0.00429589	0.0336473	8.76583	12.169	1.36322	chr2R	2821685	2822309	625	-	103	59	58	37	0.4747	0.6941	0.8657	0.9737	-0.3353
Dscam1	5_Junction_26899_Junction_26902	5_Junction_26899_Junction_26902	J001	0.0298672	29.1142	6.8236e-08	3.01258e-06	4.23213	7.0355	1.66315	chr2R	3249372	3251959	2588	-	7	9	16	22	0.25	0.3214	0.8889	0.88	-0.59875
Dscam1	5_Junction_26899_Junction_26902	5_Junction_26899_Junction_26902	J002	0.03056	28.954	7.41167e-08	3.23671e-06	6.36502	2.79221	-2.58281	chr2R	3249372	3252815	3444	-	21	19	2	3	0.75	0.6786	0.1111	0.12	0.59875
CG18812	5_Junction_27512_Junction_27514	5_Junction_27512_Junction_27514	J001	0.00807539	158.814	2.05492e-36	2.64732e-33	9.92709	14.2097	1.62327	chr2R	3607501	3609537	2037	-	55	50	152	186	0.3143	0.3049	0.8686	0.8815	-0.56545
CG18812	5_Junction_27512_Junction_27514	5_Junction_27512_Junction_27514	J002	0.00818105	158.028	3.05233e-36	3.78101e-33	12.9296	7.22607	-2.35296	chr2R	3607501	3613192	5692	-	120	114	23	25	0.6857	0.6951	0.1314	0.1185	0.56545
CG30497	5_Junction_27542_Junction_27545	5_Junction_27542_Junction_27545	J001	0.00986695	13.4377	0.000246622	0.00342886	10.5616	9.11659	-0.592718	chr2R	3629425	3632383	2959	-	37	43	72	64	0.7551	0.7544	0.5217	0.5161	0.23585
CG30497	5_Junction_27542_Junction_27545	5_Junction_27542_Junction_27545	J002	0.0101202	13.3511	0.000258267	0.00355394	6.87552	8.86004	0.921448	chr2R	3629425	3645538	16114	-	12	14	66	60	0.2449	0.2456	0.4783	0.4839	-0.23585
CG18659	5_Junction_29262_Junction_29263	5_Junction_29262_Junction_29263	J001	0.0360352	9.10797	0.00254499	0.022386	6.12192	3.82345	-1.50142	chr2R	5011650	5012247	598	-	14	21	3	7	0.1867	0.2386	0.0366	0.0986	0.14505
CG18659	5_Junction_29262_Junction_29263	5_Junction_29262_Junction_29263	J002	0.0294655	9.80629	0.00173916	0.016472	10.182	11.36	0.463853	chr2R	5011650	5013054	1405	-	61	67	79	64	0.8133	0.7614	0.9634	0.9014	-0.14505
hig	5_Junction_29405_Junction_29406	5_Junction_29405_Junction_29406	J001	0.0249075	5.20044	0.0225812	0.114505	8.53558	7.07137	-0.68202	chr2R	5118153	5118609	457	-	46	50	18	15	0.2911	0.3597	0.1565	0.2344	0.12995
hig	5_Junction_29405_Junction_29406	5_Junction_29405_Junction_29406	J002	0.0238041	5.32758	0.0209906	0.108697	11.1012	12.1485	0.400119	chr2R	5118153	5119251	1099	-	112	89	97	49	0.7089	0.6403	0.8435	0.7656	-0.12995
Mef2	5_Junction_30146_Junction_30147	5_Junction_30146_Junction_30147	J001	0.0943949	6.53354	0.0105859	0.0663952	10.0064	12.2847	0.886012	chr2R	5809508	5816403	6896	-	50	39	59	189	0.6494	0.629	0.7867	0.9175	-0.2129
Mef2	5_Junction_30146_Junction_30147	5_Junction_30146_Junction_30147	J002	0.0982125	6.33082	0.0118658	0.0721943	8.07433	5.68404	-1.215	chr2R	5809508	5821822	12315	-	27	23	16	17	0.3506	0.371	0.2133	0.0825	0.2129
lola	5_Junction_31193_Junction_31194	5_Junction_31193_Junction_31194	J001	0.00868194	33.5667	6.88613e-09	3.92534e-07	10.3867	7.20361	-1.39162	chr2R	6421473	6422353	881	-	33	49	30	39	0.193	0.2168	0.0716	0.0643	0.13695
lola	5_Junction_31193_Junction_31194	5_Junction_31193_Junction_31194	J002	0.00811623	34.39	4.51044e-09	2.68517e-07	15.6413	16.9642	0.461653	chr2R	6421473	6428848	7376	-	138	177	389	568	0.807	0.7832	0.9284	0.9357	-0.13695
bun	5_Junction_3189_Junction_3191	5_Junction_3189_Junction_3191	J001	0.0203493	7.66535	0.00562914	0.0411526	17.2214	18.401	0.406009	chr2L	12458223	12460587	2365	-	246	248	649	621	0.656	0.6375	0.7409	0.8034	-0.1254
bun	5_Junction_3189_Junction_3191	5_Junction_3189_Junction_3191	J002	0.0204774	7.62657	0.00575147	0.0418758	14.7407	13.4211	-0.475122	chr2L	12458223	12477113	18891	-	129	141	227	152	0.344	0.3625	0.2591	0.1966	0.1254
Sobp	5_Junction_32442_Junction_32449_Junction_32455_Junction_32464_Junction_32466_Junction_32467_Junction_32488_Junction_32500	5_Junction_32442_Junction_32449_Junction_32455_Junction_32464_Junction_32466_Junction_32467_Junction_32488_Junction_32500	J001	0.0306586	0.244734	0.620808	0.883667	9.41722	8.49922	-0.394499	chr2R	7718843	7726978	8136	-	47	45	31	40	0.1416	0.1661	0.1054	0.1695	0.0164
Sobp	5_Junction_32442_Junction_32449_Junction_32455_Junction_32464_Junction_32466_Junction_32467_Junction_32488_Junction_32500	5_Junction_32442_Junction_32449_Junction_32455_Junction_32464_Junction_32466_Junction_32467_Junction_32488_Junction_32500	J002	0.167736	1.1984	0.273642	0.590222	12.9935	10.9897	-0.757742	chr2R	7718843	7731865	13023	-	160	86	110	37	0.4819	0.3173	0.3741	0.1568	0.13415
Sobp	5_Junction_32442_Junction_32449_Junction_32455_Junction_32464_Junction_32466_Junction_32467_Junction_32488_Junction_32500	5_Junction_32442_Junction_32449_Junction_32455_Junction_32464_Junction_32466_Junction_32467_Junction_32488_Junction_32500	J003	0.0236969	12.3065	0.000451372	0.00560529	5.44573	8.04618	1.3423	chr2R	7718843	7739950	21108	-	12	12	40	22	0.0361	0.0443	0.1361	0.0932	-0.07445
Sobp	5_Junction_32442_Junction_32449_Junction_32455_Junction_32464_Junction_32466_Junction_32467_Junction_32488_Junction_32500	5_Junction_32442_Junction_32449_Junction_32455_Junction_32464_Junction_32466_Junction_32467_Junction_32488_Junction_32500	J004	0.0242637	13.0207	0.000308065	0.00410929	2.85531	5.6954	2.14518	chr2R	7718843	7749647	30805	-	2	4	15	12	0.006	0.0148	0.051	0.0508	-0.0405
Sobp	5_Junction_32442_Junction_32449_Junction_32455_Junction_32464_Junction_32466_Junction_32467_Junction_32488_Junction_32500	5_Junction_32442_Junction_32449_Junction_32455_Junction_32464_Junction_32466_Junction_32467_Junction_32488_Junction_32500	J005	0.0627753	9.5924	0.00195385	0.0180593	6.58837	3.04586	-2.4399	chr2R	7718843	7751512	32670	-	16	21	6	1	0.0482	0.0775	0.0204	0.0042	0.05055
Sobp	5_Junction_32442_Junction_32449_Junction_32455_Junction_32464_Junction_32466_Junction_32467_Junction_32488_Junction_32500	5_Junction_32442_Junction_32449_Junction_32455_Junction_32464_Junction_32466_Junction_32467_Junction_32488_Junction_32500	J006	0.0121769	4.97213	0.0257589	0.125557	7.37365	5.30685	-1.11114	chr2R	7718843	7751592	32750	-	27	22	12	11	0.0813	0.0812	0.0408	0.0466	0.03755
Sobp	5_Junction_32442_Junction_32449_Junction_32455_Junction_32464_Junction_32466_Junction_32467_Junction_32488_Junction_32500	5_Junction_32442_Junction_32449_Junction_32455_Junction_32464_Junction_32466_Junction_32467_Junction_32488_Junction_32500	J007	0.0422845	6.07637	0.0137002	0.0800584	9.20518	10.9702	0.715921	chr2R	7718843	7783024	64182	-	50	37	64	80	0.1506	0.1365	0.2177	0.339	-0.1348
Sobp	5_Junction_32442_Junction_32449_Junction_32455_Junction_32464_Junction_32466_Junction_32467_Junction_32488_Junction_32500	5_Junction_32442_Junction_32449_Junction_32455_Junction_32464_Junction_32466_Junction_32467_Junction_32488_Junction_32500	J008	0.216938	0.0157226	0.900215	0.989575	8.20375	7.35905	-0.393548	chr2R	7718843	7827931	109089	-	18	44	16	33	0.0542	0.1624	0.0544	0.1398	0.0112
CG8818	5_Junction_33259_Junction_33273	5_Junction_33259_Junction_33273	J001	0.019709	11.1532	0.000838855	0.00920354	10.2056	12.0418	0.714122	chr2R	8405526	8417781	12256	-	124	111	78	17	0.369	0.4022	0.6667	0.5	-0.19775
CG8818	5_Junction_33259_Junction_33273	5_Junction_33259_Junction_33273	J002	0.0194934	11.2316	0.000804165	0.00890484	11.9413	10.1029	-0.717637	chr2R	8405526	8627301	221776	-	212	165	39	17	0.631	0.5978	0.3333	0.5	0.19775
Nacalpha	5_Junction_33545_Junction_33546_Junction_33547	5_Junction_33545_Junction_33546_Junction_33547	J001	0.0195263	4.32511	0.037554	0.163099	7.61525	8.75401	0.514968	chr2R	8648026	8648230	205	-	24	16	44	58	0.4898	0.3556	0.5789	0.6042	-0.16885
Nacalpha	5_Junction_33545_Junction_33546_Junction_33547	5_Junction_33545_Junction_33546_Junction_33547	J002	0.0144849	0.0139736	0.905901	0.991348	6.27371	6.40183	0.0683825	chr2R	8648026	8648304	279	-	13	12	22	25	0.2653	0.2667	0.2895	0.2604	-0.00895
Nacalpha	5_Junction_33545_Junction_33546_Junction_33547	5_Junction_33545_Junction_33546_Junction_33547	J003	0.0296412	7.13278	0.00756872	0.0517824	6.69565	4.66906	-1.18358	chr2R	8648026	8648308	283	-	12	17	10	13	0.2449	0.3778	0.1316	0.1354	0.17785
Nmda1	5_Junction_33629_Junction_33630	5_Junction_33629_Junction_33630	J001	0.0791183	13.489	0.000239971	0.00334795	15.4678	12.1822	-1.19071	chr2R	8766215	8766555	341	-	138	184	138	135	0.4759	0.6174	0.2639	0.1577	0.33585
Nmda1	5_Junction_33629_Junction_33630	5_Junction_33629_Junction_33630	J002	0.0788374	13.5341	0.000234263	0.00328183	14.6093	17.884	1.14453	chr2R	8766215	8766700	486	-	152	114	385	721	0.5241	0.3826	0.7361	0.8423	-0.33585
bbc	5_Junction_34065_Junction_34068	5_Junction_34065_Junction_34068	J001	0.0152158	13.4516	0.000244791	0.00340488	7.91249	9.73316	0.790341	chr2R	9375637	9376420	784	-	36	32	48	40	0.3303	0.3048	0.5217	0.6154	-0.251
bbc	5_Junction_34065_Junction_34068	5_Junction_34065_Junction_34068	J002	0.0148696	13.5707	0.000229744	0.00323591	10.5137	8.89409	-0.668975	chr2R	9375637	9378243	2607	-	73	73	44	25	0.6697	0.6952	0.4783	0.3846	0.251
fl(2)d	5_Junction_34354_Junction_34355	5_Junction_34354_Junction_34355	J001	0.0243304	6.29844	0.0120844	0.0731584	7.62009	8.98341	0.611741	chr2R	9709062	9709269	208	-	18	20	35	79	0.4737	0.4348	0.6034	0.7117	-0.2033
fl(2)d	5_Junction_34354_Junction_34355	5_Junction_34354_Junction_34355	J002	0.0251097	6.21032	0.0127008	0.075877	8.22667	6.71067	-0.726033	chr2R	9709062	9711295	2234	-	20	26	23	32	0.5263	0.5652	0.3966	0.2883	0.2033
shot	5_Junction_34435_Junction_34436	5_Junction_34435_Junction_34436	J001	0.0385373	6.37777	0.0115559	0.0708283	11.1226	12.5858	0.555255	chr2R	9753000	9753260	261	-	99	70	118	78	0.1722	0.1336	0.2327	0.3362	-0.13155
shot	5_Junction_34435_Junction_34436	5_Junction_34435_Junction_34436	J002	0.0381173	6.43483	0.0111904	0.0690946	17.9949	16.6704	-0.457674	chr2R	9753000	9753322	323	-	476	454	389	154	0.8278	0.8664	0.7673	0.6638	0.13155
CG41378	5_Junction_34819_Junction_34822_Junction_34847_Junction_34851	5_Junction_34819_Junction_34822_Junction_34847_Junction_34851	J001	0.032374	1.40392	0.236069	0.541799	7.4545	8.52945	0.492977	chr2RHet	1560981	1567526	6546	-	36	23	11	50	0.2057	0.1855	0.1897	0.3185	-0.0585
CG41378	5_Junction_34819_Junction_34822_Junction_34847_Junction_34851	5_Junction_34819_Junction_34822_Junction_34847_Junction_34851	J002	0.0238574	13.8144	0.000201782	0.00290644	10.2861	7.68864	-1.11917	chr2RHet	1560981	1569433	8453	-	89	50	12	35	0.5086	0.4032	0.2069	0.2229	0.241
CG41378	5_Junction_34819_Junction_34822_Junction_34847_Junction_34851	5_Junction_34819_Junction_34822_Junction_34847_Junction_34851	J003	0.0190083	7.45571	0.00632357	0.0450298	7.30042	8.9686	0.758194	chr2RHet	1560981	1657664	96684	-	35	21	23	47	0.2	0.1694	0.3966	0.2994	-0.1633
CG41378	5_Junction_34819_Junction_34822_Junction_34847_Junction_34851	5_Junction_34819_Junction_34822_Junction_34847_Junction_34851	J004	0.139883	0.131123	0.71727	0.932888	6.74675	6.98212	0.118833	chr2RHet	1560981	1733460	172480	-	15	30	12	25	0.0857	0.2419	0.2069	0.1592	-0.01925
uex	5_Junction_35269_Junction_35271	5_Junction_35269_Junction_35271	J001	0.0469192	14.4424	0.000144509	0.00222369	9.65224	6.7983	-1.29515	chr2RHet	3169621	3171888	2268	-	86	59	17	11	0.1834	0.1657	0.0733	0.0312	0.1223
uex	5_Junction_35269_Junction_35271	5_Junction_35269_Junction_35271	J002	0.0452907	14.8105	0.000118869	0.00189105	15.6102	17.9073	0.798146	chr2RHet	3169621	3174708	5088	-	383	297	215	342	0.8166	0.8343	0.9267	0.9688	-0.1223
GlcAT-P	5_Junction_36452_Junction_36453	5_Junction_36452_Junction_36453	J001	0.0602091	8.84695	0.00293579	0.0250273	3.11275	5.42213	1.7255	chr3L	11189975	11190253	279	-	6	1	12	13	0.0789	0.0455	0.2222	0.3714	-0.2346
GlcAT-P	5_Junction_36452_Junction_36453	5_Junction_36452_Junction_36453	J002	0.0479698	9.62443	0.00192006	0.0178264	9.41226	8.02749	-0.604347	chr3L	11189975	11190337	363	-	70	21	42	22	0.9211	0.9545	0.7778	0.6286	0.2346
CG32085	5_Junction_36758_Junction_36759	5_Junction_36758_Junction_36759	J001	0.0252778	30.1832	3.93092e-08	1.83616e-06	7.0662	9.20523	0.973785	chr3L	11668765	11673050	4286	-	26	22	46	35	0.5417	0.5238	0.9787	0.8974	-0.4053
CG32085	5_Junction_36758_Junction_36759	5_Junction_36758_Junction_36759	J002	0.0294747	28.9033	7.6083e-08	3.30912e-06	6.68715	2.70225	-2.84888	chr3L	11668765	11673142	4378	-	22	20	1	4	0.4583	0.4762	0.0213	0.1026	0.4053
CG5946	5_Junction_36892_Junction_36893	5_Junction_36892_Junction_36893	J001	0.115198	20.1355	7.21455e-06	0.000176968	11.6268	7.17721	-1.88854	chr3L	11812007	11812919	913	-	59	95	21	29	0.3224	0.4948	0.0396	0.089	0.3443
CG5946	5_Junction_36892_Junction_36893	5_Junction_36892_Junction_36893	J002	0.113595	20.391	6.31255e-06	0.000157787	12.9243	17.4945	1.62074	chr3L	11812007	11814932	2926	-	124	97	509	297	0.6776	0.5052	0.9604	0.911	-0.3443
CG32103	5_Junction_37291_Junction_37293	5_Junction_37291_Junction_37293	J001	0.0589797	14.0883	0.000174424	0.0025876	7.39205	5.28148	-1.1355	chr3L	12398260	12401208	2949	-	16	16	20	15	0.9412	0.8889	0.5714	0.3947	0.432
CG32103	5_Junction_37291_Junction_37293	5_Junction_37291_Junction_37293	J002	0.0640848	13.687	0.000215946	0.00307674	2.51278	5.49105	2.40593	chr3L	12398260	12404792	6533	-	1	2	15	23	0.0588	0.1111	0.4286	0.6053	-0.432
CG10960	5_Junction_37634_Junction_37635	5_Junction_37634_Junction_37635	J001	0.112244	5.91769	0.0149896	0.0856581	10.8356	8.28396	-1.06433	chr3L	12820682	12824981	4300	-	32	19	92	89	0.6154	0.5135	0.3651	0.1813	0.29125
CG10960	5_Junction_37634_Junction_37635	5_Junction_37634_Junction_37635	J002	0.111118	5.96768	0.0145704	0.0838132	9.81722	12.3727	0.996197	chr3L	12820682	12828410	7729	-	20	18	160	402	0.3846	0.4865	0.6349	0.8187	-0.29125
th	5_Junction_39839_Junction_39842_Junction_39844	5_Junction_39839_Junction_39842_Junction_39844	J001	0.0480268	1.96495	0.160985	0.429519	9.91937	9.21322	-0.29334	chr3L	16033165	16033536	372	-	72	41	17	66	0.3396	0.2124	0.1683	0.1982	0.09275
th	5_Junction_39839_Junction_39842_Junction_39844	5_Junction_39839_Junction_39842_Junction_39844	J002	0.0464839	4.4215	0.0354889	0.156531	11.7528	13.7338	0.734058	chr3L	16033165	16039583	6419	-	80	102	60	218	0.3774	0.5285	0.5941	0.6547	-0.17145
th	5_Junction_39839_Junction_39842_Junction_39844	5_Junction_39839_Junction_39842_Junction_39844	J003	0.0289611	3.0602	0.0802317	0.274312	9.86068	8.76025	-0.463595	chr3L	16033165	16043556	10392	-	60	50	24	49	0.283	0.2591	0.2376	0.1471	0.0787
metl	5_Junction_40266_Junction_40267	5_Junction_40266_Junction_40267	J001	0.0192395	17.4672	2.92301e-05	0.000588199	9.84105	8.31932	-0.649964	chr3L	1638854	1638907	54	-	52	48	35	35	0.8814	0.9231	0.6034	0.6604	0.27035
metl	5_Junction_40266_Junction_40267	5_Junction_40266_Junction_40267	J002	0.0224661	16.7372	4.29307e-05	0.000816456	3.87656	6.69939	1.76491	chr3L	1638854	1639040	187	-	7	4	23	18	0.1186	0.0769	0.3966	0.3396	-0.27035
CG7971	5_Junction_40564_Junction_40565	5_Junction_40564_Junction_40565	J001	0.0226908	28.0235	1.1985e-07	4.94241e-06	11.6307	8.47264	-1.28795	chr3L	1661592	1661705	114	-	118	116	23	28	0.1542	0.1686	0.034	0.0601	0.11435
CG7971	5_Junction_40564_Junction_40565	5_Junction_40564_Junction_40565	J002	0.0220753	28.5557	9.10433e-08	3.88633e-06	18.2842	20.4716	0.745543	chr3L	1661592	1663918	2327	-	647	572	653	438	0.8458	0.8314	0.966	0.9399	-0.11435
CG7971	5_Junction_40579_Junction_40581	5_Junction_40579_Junction_40581	J001	0.00503345	84.9783	3.01653e-20	1.11032e-17	14.1422	10.8354	-1.23574	chr3L	1664021	1664088	68	-	223	190	55	54	0.5718	0.5588	0.2218	0.2298	0.3395
CG7971	5_Junction_40579_Junction_40581	5_Junction_40579_Junction_40581	J002	0.0050097	85.139	2.7811e-20	1.0355e-17	13.0949	15.67	0.923078	chr3L	1664021	1664530	510	-	167	150	193	181	0.4282	0.4412	0.7782	0.7702	-0.3395
Eip75B	5_Junction_41530_Junction_41531	5_Junction_41530_Junction_41531	J001	0.0552662	5.34026	0.0208383	0.108153	9.90776	11.403	0.59167	chr3L	17952720	17954103	1384	-	107	74	30	65	0.7589	0.6271	0.8333	0.8904	-0.16885
Eip75B	5_Junction_41530_Junction_41531	5_Junction_41530_Junction_41531	J002	0.0575325	5.21317	0.0224165	0.113947	7.22154	5.38313	-0.991129	chr3L	17952720	17962461	9742	-	34	44	6	8	0.2411	0.3729	0.1667	0.1096	0.16885
skd	5_Junction_44019_Junction_44024_Junction_44027	5_Junction_44019_Junction_44024_Junction_44027	J001	0.0631035	0.155337	0.693486	0.922292	7.84261	7.45882	-0.180579	chr3L	21018648	21019228	581	-	23	29	11	44	0.23	0.2522	0.1375	0.2803	0.0322
skd	5_Junction_44019_Junction_44024_Junction_44027	5_Junction_44019_Junction_44024_Junction_44027	J002	0.0154294	14.0354	0.000179401	0.00264619	7.8935	9.73161	0.79846	chr3L	21018648	21020284	1637	-	21	32	40	71	0.21	0.2783	0.5	0.4522	-0.23195
skd	5_Junction_44019_Junction_44024_Junction_44027	5_Junction_44019_Junction_44024_Junction_44027	J003	0.0287759	7.69079	0.00555032	0.0407057	10.3472	8.22775	-0.895996	chr3L	21018648	21020394	1747	-	56	54	29	42	0.56	0.4696	0.3625	0.2675	0.1998
Spn	5_Junction_46516_Junction_46517	5_Junction_46516_Junction_46517	J001	0.011875	18.0918	2.10508e-05	0.000442114	13.146	11.6242	-0.568865	chr3L	2508907	2509362	456	-	182	146	100	33	0.7948	0.7526	0.5747	0.5238	0.22445
Spn	5_Junction_46516_Junction_46517	5_Junction_46516_Junction_46517	J002	0.0122891	17.8258	2.42083e-05	0.000499473	8.63736	10.7153	0.860353	chr3L	2508907	2511161	2255	-	47	48	74	30	0.2052	0.2474	0.4253	0.4762	-0.22445
fwd	5_Junction_47165_Junction_47166	5_Junction_47165_Junction_47166	J001	0.0295965	18.6444	1.57506e-05	0.000345089	3.47704	6.49987	1.99386	chr3L	311285	311380	96	-	6	3	17	20	0.125	0.0769	0.4048	0.5	-0.35145
fwd	5_Junction_47165_Junction_47166	5_Junction_47165_Junction_47166	J002	0.0253977	19.4952	1.00854e-05	0.00023606	8.88338	7.04847	-0.845035	chr3L	311285	313022	1738	-	42	36	25	20	0.875	0.9231	0.5952	0.5	0.35145
CG11537	5_Junction_47196_Junction_47198	5_Junction_47196_Junction_47198	J001	0.0443626	7.86972	0.00502694	0.0378483	9.75831	7.91319	-0.80037	chr3L	3131204	3132307	1104	-	43	58	31	28	0.6418	0.6667	0.3163	0.4912	0.2505
CG11537	5_Junction_47196_Junction_47198	5_Junction_47196_Junction_47198	J002	0.0446048	7.84125	0.00510673	0.0382761	7.61983	9.49794	0.829326	chr3L	3131204	3142826	11623	-	24	29	67	29	0.3582	0.3333	0.6837	0.5088	-0.2505
CG32264	5_Junction_47714_Junction_47715_Junction_47716	5_Junction_47714_Junction_47715_Junction_47716	J001	0.0135338	54.651	1.43953e-13	2.12188e-11	13.5275	15.9593	0.866471	chr3L	3723872	3741994	18123	-	141	104	350	234	0.705	0.6887	0.9511	0.9213	-0.23935
CG32264	5_Junction_47714_Junction_47715_Junction_47716	5_Junction_47714_Junction_47715_Junction_47716	J002	0.0180046	21.8734	2.91249e-06	7.97194e-05	7.14173	4.12279	-1.79692	chr3L	3723872	3758405	34534	-	24	16	7	8	0.12	0.106	0.019	0.0315	0.08775
CG32264	5_Junction_47714_Junction_47715_Junction_47716	5_Junction_47714_Junction_47715_Junction_47716	J003	0.0162021	35.9463	2.02835e-09	1.29875e-07	8.71645	5.01463	-1.90722	chr3L	3723872	3767135	43264	-	35	31	11	12	0.175	0.2053	0.0299	0.0472	0.1516
CG10103	5_Junction_50433_Junction_50434	5_Junction_50433_Junction_50434	J001	0.0294023	28.8874	7.67088e-08	3.33184e-06	8.93607	5.41185	-1.75642	chr3L	6747593	6747843	251	-	30	25	18	17	0.4762	0.3571	0.0845	0.1172	0.3158
CG10103	5_Junction_50433_Junction_50434	5_Junction_50433_Junction_50434	J002	0.0271113	30.083	4.13949e-08	1.91966e-06	10.1808	12.5813	0.926095	chr3L	6747593	6748045	453	-	33	45	195	128	0.5238	0.6429	0.9155	0.8828	-0.3158
Pdp1	5_Junction_51456_Junction_51459	5_Junction_51456_Junction_51459	J001	0.0110385	37.3051	1.01019e-09	6.89306e-08	8.24338	2.5772	-3.73543	chr3L	7847289	7848307	1019	-	86	74	1	1	0.1842	0.1689	0.0088	0.0161	0.1641
Pdp1	5_Junction_51456_Junction_51459	5_Junction_51456_Junction_51459	J002	0.0102878	37.7966	7.85201e-10	5.53975e-08	13.8799	15.2198	0.478587	chr3L	7847289	7848377	1089	-	381	364	113	61	0.8158	0.8311	0.9912	0.9839	-0.1641
Idh	5_Junction_51947_Junction_51948_Junction_51950	5_Junction_51947_Junction_51948_Junction_51950	J001	0.0230709	2.96564	0.085051	0.28464	4.61818	5.93048	0.808202	chr3L	8351005	8351114	110	-	4	8	23	18	0.0147	0.0286	0.0471	0.0357	-0.01975
Idh	5_Junction_51947_Junction_51948_Junction_51950	5_Junction_51947_Junction_51948_Junction_51950	J002	0.007794	9.43965	0.00212344	0.0193218	9.64341	11.1412	0.599149	chr3L	8351005	8351654	650	-	34	37	96	113	0.125	0.1321	0.1967	0.2242	-0.0819
Idh	5_Junction_51947_Junction_51948_Junction_51950	5_Junction_51947_Junction_51948_Junction_51950	J003	0.00604982	13.4289	0.000247773	0.00344189	17.0105	16.1487	-0.299857	chr3L	8351005	8353891	2887	-	234	235	369	373	0.8603	0.8393	0.7561	0.7401	0.1017
bol	5_Junction_52794_Junction_52798	5_Junction_52794_Junction_52798	J001	0.00692719	23.0352	1.59061e-06	4.74561e-05	11.8973	9.76125	-0.840336	chr3L	9106587	9116714	10128	-	186	140	41	17	0.4336	0.4334	0.2455	0.1932	0.21415
bol	5_Junction_52794_Junction_52798	5_Junction_52794_Junction_52798	J002	0.00683901	23.1384	1.50749e-06	4.53118e-05	12.9298	14.4088	0.536695	chr3L	9106587	9122995	16409	-	243	183	126	71	0.5664	0.5666	0.7545	0.8068	-0.21415
CG40228	5_Junction_54506_Junction_54508_Junction_54509	5_Junction_54506_Junction_54508_Junction_54509	J001	0.0217768	37.4309	9.47096e-10	6.5108e-08	19.6809	16.3154	-1.15761	chr3LHet	2190418	2190547	130	-	279	622	345	392	0.701	0.6828	0.4078	0.3182	0.3289
CG40228	5_Junction_54506_Junction_54508_Junction_54509	5_Junction_54506_Junction_54508_Junction_54509	J002	0.0386456	17.7042	2.58062e-05	0.00052838	14.681	17.5377	0.999719	chr3LHet	2190418	2190560	143	-	71	199	338	644	0.1784	0.2184	0.3995	0.5227	-0.2627
CG40228	5_Junction_54506_Junction_54508_Junction_54509	5_Junction_54506_Junction_54508_Junction_54509	J003	0.0130818	8.27562	0.00401809	0.0319217	11.9536	13.3994	0.536397	chr3LHet	2190418	2190562	145	-	48	90	163	196	0.1206	0.0988	0.1927	0.1591	-0.0662
Fer2	5_Junction_56619_Junction_56621	5_Junction_56619_Junction_56621	J001	0.047811	14.1603	0.000167873	0.00251007	8.35853	4.3625	-2.18981	chr3R	11975904	11976000	97	-	6	2	63	63	0.5	0.4	0.0991	0.0629	0.369
Fer2	5_Junction_56619_Junction_56621	5_Junction_56619_Junction_56621	J002	0.0455543	14.3241	0.000153885	0.00233617	8.7503	11.8049	1.23244	chr3R	11975904	11976027	124	-	6	3	573	939	0.5	0.6	0.9009	0.9371	-0.369
Ssdp	5_Junction_58359_Junction_58360	5_Junction_58359_Junction_58360	J001	0.0179129	13.546	0.000232787	0.00326619	11.1458	9.13009	-0.816176	chr3R	14022842	14024422	1581	-	63	44	46	74	0.4145	0.3359	0.218	0.1766	0.1779
Ssdp	5_Junction_58359_Junction_58360	5_Junction_58359_Junction_58360	J002	0.0174278	13.7753	0.00020603	0.00295639	13.0768	14.5997	0.550832	chr3R	14022842	14024927	2086	-	89	87	165	345	0.5855	0.6641	0.782	0.8234	-0.1779
Ada2a	5_Junction_58443_Junction_58444	5_Junction_58443_Junction_58444	J001	0.0274365	31.9083	1.61625e-08	8.37095e-07	9.52026	6.00043	-1.66377	chr3R	14079177	14079246	70	-	58	49	13	14	0.537	0.4188	0.1262	0.1197	0.35495
Ada2a	5_Junction_58443_Junction_58444	5_Junction_58443_Junction_58444	J002	0.0265265	32.4801	1.20418e-08	6.43169e-07	9.90069	12.5249	1.01878	chr3R	14079177	14081037	1861	-	50	68	90	103	0.463	0.5812	0.8738	0.8803	-0.35495
Rim2	5_Junction_5848_Junction_5849_Junction_5850	5_Junction_5848_Junction_5849_Junction_5850	J001	0.0235278	0.0433942	0.834985	0.973865	10.747	10.2278	-0.206677	chr2L	1718491	1718673	183	-	36	50	123	60	0.3913	0.5319	0.444	0.4511	0.01405
Rim2	5_Junction_5848_Junction_5849_Junction_5850	5_Junction_5848_Junction_5849_Junction_5850	J002	0.0597215	2.01597	0.155652	0.420762	10.6512	8.99082	-0.681917	chr2L	1718491	1718694	204	-	50	35	78	50	0.5435	0.3723	0.2816	0.3759	0.12915
Rim2	5_Junction_5848_Junction_5849_Junction_5850	5_Junction_5848_Junction_5849_Junction_5850	J003	0.0504625	7.90446	0.0049313	0.0373026	5.37118	8.12976	1.42513	chr2L	1718491	1718738	248	-	6	9	76	23	0.0652	0.0957	0.2744	0.1729	-0.1432
kra	5_Junction_58615_Junction_58616_Junction_58618	5_Junction_58615_Junction_58616_Junction_58618	J001	0.0552614	8.46969	0.00361114	0.029361	4.36939	7.88295	1.96903	chr3R	1425086	1425758	673	-	3	4	28	94	0.0476	0.0571	0.1451	0.2362	-0.1383
kra	5_Junction_58615_Junction_58616_Junction_58618	5_Junction_58615_Junction_58616_Junction_58618	J002	0.0304679	20.3817	6.34346e-06	0.000158498	5.14456	9.2038	2.03445	chr3R	1425086	1426008	923	-	3	7	70	114	0.0476	0.1	0.3627	0.2864	-0.25075
kra	5_Junction_58615_Junction_58616_Junction_58618	5_Junction_58615_Junction_58616_Junction_58618	J003	0.00947031	51.6918	6.49344e-13	8.62409e-11	13.0382	10.7539	-0.866635	chr3R	1425086	1426735	1650	-	57	59	95	190	0.9048	0.8429	0.4922	0.4774	0.38905
Rga	5_Junction_58680_Junction_58681	5_Junction_58680_Junction_58681	J001	0.0364428	11.6371	0.000646502	0.00746438	7.49587	9.54776	0.908823	chr3R	1434741	1435352	612	-	17	25	88	30	0.1441	0.1938	0.3478	0.4762	-0.24305
Rga	5_Junction_58680_Junction_58681	5_Junction_58680_Junction_58681	J002	0.0354025	11.831	0.000582532	0.00687379	13.091	11.4012	-0.634151	chr3R	1434741	1435370	630	-	101	104	165	33	0.8559	0.8062	0.6522	0.5238	0.24305
unc79	5_Junction_59893_Junction_59894	5_Junction_59893_Junction_59894	J001	0.0113821	25.1703	5.24837e-07	1.79252e-05	8.6367	5.29032	-1.70016	chr3R	15066560	15067374	815	-	76	53	8	5	0.2714	0.2978	0.0833	0.0676	0.20915
unc79	5_Junction_59893_Junction_59894	5_Junction_59893_Junction_59894	J002	0.0107136	25.5762	4.25261e-07	1.49084e-05	11.9685	13.4491	0.548865	chr3R	15066560	15068245	1686	-	204	125	88	69	0.7286	0.7022	0.9167	0.9324	-0.20915
Dif	5_Junction_6049_Junction_6050	5_Junction_6049_Junction_6050	J001	0.0189608	44.112	3.10108e-11	3.09694e-09	6.07842	9.20795	1.48958	chr2L	17414332	17414527	196	-	31	13	20	42	0.3444	0.3095	0.9091	0.875	-0.5651
Dif	5_Junction_6049_Junction_6050	5_Junction_6049_Junction_6050	J002	0.0190742	44.0406	3.21639e-11	3.18739e-09	8.08506	3.83425	-2.46637	chr2L	17414332	17415279	948	-	59	29	2	6	0.6556	0.6905	0.0909	0.125	0.5651
Gfrl	5_Junction_60715_Junction_60716	5_Junction_60715_Junction_60716	J001	0.165368	7.72709	0.00543984	0.0401101	8.66459	5.86524	-1.37469	chr3R	16236926	16263401	26476	-	76	100	9	3	0.4419	0.6944	0.2368	0.1	0.39975
Gfrl	5_Junction_60715_Junction_60716	5_Junction_60715_Junction_60716	J002	0.16542	7.72525	0.00544539	0.0401258	7.81698	10.7371	1.23862	chr3R	16236926	16290727	53802	-	96	44	29	27	0.5581	0.3056	0.7632	0.9	-0.39975
Gfrl	5_Junction_60725_Junction_60726	5_Junction_60725_Junction_60726	J001	0.0409492	6.10024	0.0135163	0.0792427	7.39553	5.91654	-0.76521	chr3R	16263857	16275165	11309	-	103	104	6	1	0.7923	0.8062	0.75	0.1429	0.3528
Gfrl	5_Junction_60725_Junction_60726	5_Junction_60725_Junction_60726	J002	0.0772245	5.16841	0.0230013	0.11615	4.0213	6.28319	1.43346	chr3R	16263857	16275179	11323	-	27	25	2	6	0.2077	0.1938	0.25	0.8571	-0.3528
Stat92E	5_Junction_60778_Junction_60779_Junction_60780	5_Junction_60778_Junction_60779_Junction_60780	J001	0.0942869	6.293	0.0121216	0.0733215	8.51553	5.81504	-1.33765	chr3R	16367275	16367400	126	-	49	26	15	12	0.6125	0.4	0.2778	0.1714	0.28165
Stat92E	5_Junction_60778_Junction_60779_Junction_60780	5_Junction_60778_Junction_60779_Junction_60780	J002	0.0252316	1.06659	0.301716	0.622884	6.21208	6.73497	0.275035	chr3R	16367275	16376441	9167	-	16	18	19	19	0.2	0.2769	0.3519	0.2714	-0.0732
Stat92E	5_Junction_60778_Junction_60779_Junction_60780	5_Junction_60778_Junction_60779_Junction_60780	J003	0.0895098	3.65749	0.0558178	0.214474	6.38801	8.07457	0.825448	chr3R	16367275	16377801	10527	-	15	21	20	39	0.1875	0.3231	0.3704	0.5571	-0.20845
att-ORFA	5_Junction_60792_Junction_60794	5_Junction_60792_Junction_60794	J001	0.0342095	20.0755	7.44443e-06	0.000181914	5.63301	2.02662	-3.12392	chr3R	16380641	16382205	1565	-	12	14	1	2	0.25	0.3256	0.0233	0.0339	0.2592
att-ORFA	5_Junction_60792_Junction_60794	5_Junction_60792_Junction_60794	J002	0.0260196	21.4121	3.70425e-06	9.87605e-05	8.23026	9.64363	0.608669	chr3R	16380641	16383127	2487	-	36	29	42	57	0.75	0.6744	0.9767	0.9661	-0.2592
pre-mod(mdg4)-P	5_Junction_61873_Junction_61874	5_Junction_61873_Junction_61874	J001	0.0328151	36.0041	1.96907e-09	1.26456e-07	6.66537	9.08521	1.12517	chr3R	17183926	17184081	156	-	23	26	29	37	0.4423	0.5532	0.9667	0.9737	-0.47245
pre-mod(mdg4)-P	5_Junction_61873_Junction_61874	5_Junction_61873_Junction_61874	J002	0.0364367	34.901	3.469e-09	2.11803e-07	6.70065	1.87119	-3.94046	chr3R	17183926	17184512	587	-	29	21	1	1	0.5577	0.4468	0.0333	0.0263	0.47245
GABA-B-R2	5_Junction_62032_Junction_62033	5_Junction_62032_Junction_62033	J001	0.0561661	4.90602	0.0267633	0.129046	5.74173	7.35388	0.844366	chr3R	17597969	17598380	412	-	11	16	22	27	0.0821	0.1203	0.1692	0.2872	-0.127
GABA-B-R2	5_Junction_62032_Junction_62033	5_Junction_62032_Junction_62033	J002	0.0526264	5.10806	0.0238149	0.119064	12.9536	11.6893	-0.473324	chr3R	17597969	17598392	424	-	123	117	108	67	0.9179	0.8797	0.8308	0.7128	0.127
CASK	5_Junction_62081_Junction_62082	5_Junction_62081_Junction_62082	J001	0.210566	6.46639	0.0109933	0.0681873	14.723	11.9852	-1.00112	chr3R	17613824	17614594	771	-	305	271	112	13	0.4525	0.4883	0.244	0.0605	0.31815
CASK	5_Junction_62081_Junction_62082	5_Junction_62081_Junction_62082	J002	0.210191	6.47703	0.0109277	0.0679045	15.2116	18.0277	0.980051	chr3R	17613824	17615169	1346	-	369	284	347	202	0.5475	0.5117	0.756	0.9395	-0.31815
CG13624	5_Junction_65310_Junction_65311	5_Junction_65310_Junction_65311	J001	0.0384426	14.3945	0.000148238	0.00226753	8.85867	6.48633	-1.12106	chr3R	20388664	20397011	8348	-	38	24	12	34	0.623	0.4898	0.1846	0.2677	0.33025
CG13624	5_Junction_65310_Junction_65311	5_Junction_65310_Junction_65311	J002	0.0371484	14.6598	0.000128761	0.00202342	8.05959	10.1647	0.898832	chr3R	20388664	20402184	13521	-	23	25	53	93	0.377	0.5102	0.8154	0.7323	-0.33025
CG31064	5_Junction_67746_Junction_67747	5_Junction_67746_Junction_67747	J001	0.0744813	4.29614	0.0381989	0.165049	8.50333	7.17871	-0.614929	chr3R	23059403	23062724	3322	-	22	10	67	37	0.88	0.9091	0.7528	0.5873	0.2245
CG31064	5_Junction_67746_Junction_67747	5_Junction_67746_Junction_67747	J002	0.0806347	4.16325	0.04131	0.174488	3.43614	5.16489	1.26958	chr3R	23059403	23064245	4843	-	3	1	22	26	0.12	0.0909	0.2472	0.4127	-0.2245
CG18766	5_Junction_67762_Junction_67765	5_Junction_67762_Junction_67765	J001	0.015409	49.7116	1.78086e-12	2.18084e-10	4.85333	9.5742	2.37613	chr3R	23069666	23070366	701	-	3	7	81	100	0.05	0.1	0.4475	0.495	-0.39625
CG18766	5_Junction_67762_Junction_67765	5_Junction_67762_Junction_67765	J002	0.014939	50.225	1.37088e-12	1.71131e-10	12.6804	9.95388	-1.05484	chr3R	23069666	23070737	1072	-	57	63	100	102	0.95	0.9	0.5525	0.505	0.39625
larp	5_Junction_68481_Junction_68483	5_Junction_68481_Junction_68483	J001	0.0106213	13.6873	0.000215913	0.00307674	9.21138	7.39974	-0.813744	chr3R	24160429	24160978	550	-	66	46	23	16	0.569	0.5542	0.3151	0.3137	0.2472
larp	5_Junction_68481_Junction_68483	5_Junction_68481_Junction_68483	J002	0.0105446	13.7157	0.000212674	0.00303617	8.37554	9.95692	0.672189	chr3R	24160429	24161728	1300	-	50	37	50	35	0.431	0.4458	0.6849	0.6863	-0.2472
CG32944	5_Junction_68488_Junction_68489	5_Junction_68488_Junction_68489	J001	0.0581539	5.09495	0.0239956	0.119716	5.43183	3.79323	-1.13105	chr3R	241608	244286	2679	-	5	6	14	10	0.625	0.6667	0.3784	0.2273	0.343
CG32944	5_Junction_68488_Junction_68489	5_Junction_68488_Junction_68489	J002	0.0526479	5.23898	0.0220862	0.112704	4.11819	5.64301	1.00228	chr3R	241608	244827	3220	-	3	3	23	34	0.375	0.3333	0.6216	0.7727	-0.343
jdp	5_Junction_70944_Junction_70945	5_Junction_70944_Junction_70945	J001	0.316338	4.91891	0.0265643	0.128365	18.7842	16.2062	-0.889913	chr3R	26344295	26345328	1034	-	1141	587	314	13	0.719	0.6238	0.4392	0.0963	0.40365
jdp	5_Junction_70944_Junction_70945	5_Junction_70944_Junction_70945	J002	0.316582	4.91533	0.0266194	0.128526	15.6397	18.2099	0.89172	chr3R	26344295	26345367	1073	-	446	354	401	122	0.281	0.3762	0.5608	0.9037	-0.40365
Alh	5_Junction_72080_Junction_72081	5_Junction_72080_Junction_72081	J001	0.186989	7.18173	0.00736497	0.0507279	8.05463	10.9673	1.21959	chr3R	2921565	2922012	448	-	29	45	82	36	0.4462	0.7759	0.9213	0.9231	-0.31115
Alh	5_Junction_72080_Junction_72081	5_Junction_72080_Junction_72081	J002	0.193933	6.97732	0.00825493	0.0551076	6.69124	3.98343	-1.67695	chr3R	2921565	2922236	672	-	36	13	7	3	0.5538	0.2241	0.0787	0.0769	0.31115
CG16779	5_Junction_74142_Junction_74145_Junction_74147	5_Junction_74142_Junction_74145_Junction_74147	J001	0.0365698	0.815931	0.366372	0.690448	8.88868	9.7688	0.370305	chr3R	5312925	5318731	5807	-	46	50	55	30	0.3651	0.4032	0.534	0.375	-0.07035
CG16779	5_Junction_74142_Junction_74145_Junction_74147	5_Junction_74142_Junction_74145_Junction_74147	J002	0.00947414	5.48263	0.0192063	0.102261	9.24049	8.25698	-0.428128	chr3R	5312925	5319116	6192	-	55	52	29	25	0.4365	0.4194	0.2816	0.3125	0.1309
CG16779	5_Junction_74142_Junction_74145_Junction_74147	5_Junction_74142_Junction_74145_Junction_74147	J003	0.0393821	0.795812	0.372348	0.696777	6.67124	7.62254	0.468035	chr3R	5312925	5319243	6319	-	25	22	19	25	0.1984	0.1774	0.1845	0.3125	-0.0606
Jupiter	5_Junction_76199_Junction_76201	5_Junction_76199_Junction_76201	J001	0.12715	5.88716	0.0152517	0.0867785	15.1334	17.8069	0.931796	chr3R	7419488	7429862	10375	-	213	151	429	482	0.6615	0.4377	0.7606	0.8623	-0.26185
Jupiter	5_Junction_76199_Junction_76201	5_Junction_76199_Junction_76201	J002	0.127592	5.86762	0.0154219	0.0875151	14.5198	11.8858	-0.966243	chr3R	7419488	7445424	25937	-	109	194	135	77	0.3385	0.5623	0.2394	0.1377	0.26185
Hr38	5_Junction_8171_Junction_8172_Junction_8173_Junction_8174	5_Junction_8171_Junction_8172_Junction_8173_Junction_8174	J001	0.152406	4.65718	0.0309239	0.142965	15.2804	21.3477	2.08588	chr2L	20690061	20692145	2085	-	436	385	205	740	0.7985	0.721	0.8577	0.9548	-0.1465
Hr38	5_Junction_8171_Junction_8172_Junction_8173_Junction_8174	5_Junction_8171_Junction_8172_Junction_8173_Junction_8174	J002	0.0931648	3.82875	0.0503805	0.199401	6.29715	6.62837	0.174373	chr2L	20690061	20692148	2088	-	31	33	10	10	0.0568	0.0618	0.0418	0.0129	0.03195
Hr38	5_Junction_8171_Junction_8172_Junction_8173_Junction_8174	5_Junction_8171_Junction_8172_Junction_8173_Junction_8174	J003	0.16034	1.81317	0.178128	0.457586	8.35298	9.22113	0.376948	chr2L	20690061	20692151	2091	-	48	78	23	23	0.0879	0.1461	0.0962	0.0297	0.05405
Hr38	5_Junction_8171_Junction_8172_Junction_8173_Junction_8174	5_Junction_8171_Junction_8172_Junction_8173_Junction_8174	J004	0.0198984	46.7517	8.0576e-12	8.97962e-10	6.50026	2.77775	-2.66973	chr2L	20690061	20814038	123978	-	31	38	1	2	0.0568	0.0712	0.0042	0.0026	0.0606
spri	5_Junction_83707_Junction_83709_Junction_83710_Junction_83716	5_Junction_83707_Junction_83709_Junction_83710_Junction_83716	J001	0.0290571	2.9807	0.084263	0.28287	9.18543	7.75464	-0.634759	chrX	10475608	10567410	91803	-	38	87	22	16	0.3585	0.4508	0.3284	0.2353	0.1228
spri	5_Junction_83707_Junction_83709_Junction_83710_Junction_83716	5_Junction_83707_Junction_83709_Junction_83710_Junction_83716	J002	0.0569879	2.16305	0.141364	0.395664	6.15541	4.72624	-0.85941	chrX	10475608	10571485	95878	-	23	24	7	5	0.217	0.1244	0.1045	0.0735	0.0817
spri	5_Junction_83707_Junction_83709_Junction_83710_Junction_83716	5_Junction_83707_Junction_83709_Junction_83710_Junction_83716	J003	0.0249902	7.65535	0.00566042	0.0413156	6.43441	8.43903	0.964685	chrX	10475608	10572787	97180	-	22	30	20	27	0.2075	0.1554	0.2985	0.3971	-0.16635
spri	5_Junction_83707_Junction_83709_Junction_83710_Junction_83716	5_Junction_83707_Junction_83709_Junction_83710_Junction_83716	J004	0.0144152	0.362744	0.546986	0.837028	7.50584	7.7602	0.119844	chrX	10475608	10708401	232794	-	23	52	18	20	0.217	0.2694	0.2687	0.2941	-0.0382
Rph	5_Junction_83866_Junction_83868	5_Junction_83866_Junction_83868	J001	0.0251737	9.9779	0.00158431	0.0152932	5.51968	3.20133	-1.6991	chrX	10645815	10645934	120	-	13	11	6	2	0.2955	0.2895	0.0833	0.0833	0.2092
Rph	5_Junction_83866_Junction_83868	5_Junction_83866_Junction_83868	J002	0.0199495	10.5343	0.00117179	0.0119999	7.99183	9.0784	0.479612	chrX	10645815	10647244	1430	-	31	27	66	22	0.7045	0.7105	0.9167	0.9167	-0.2092
sky	5_Junction_8391_Junction_8395	5_Junction_8391_Junction_8395	J001	0.0233126	19.979	7.82967e-06	0.000189816	2.55089	6.14043	2.73078	chr2L	20917120	20918125	1006	-	1	3	11	27	0.0137	0.0375	0.193	0.1985	-0.17015
sky	5_Junction_8391_Junction_8395	5_Junction_8391_Junction_8395	J002	0.0182219	21.1533	4.23975e-06	0.000111242	11.8067	10.6207	-0.459421	chr2L	20917120	20918797	1678	-	72	77	46	109	0.9863	0.9625	0.807	0.8015	0.17015
CG42238	5_Junction_8438_Junction_8440	5_Junction_8438_Junction_8440	J001	0.261414	4.77142	0.028936	0.136199	3.46434	5.86201	1.65806	chr2L	20967746	21051684	83939	-	2	5	10	26	0.0215	0.0725	0.1235	0.3714	-0.20045
CG42238	5_Junction_8438_Junction_8440	5_Junction_8438_Junction_8440	J002	0.246661	4.9958	0.0254089	0.124406	12.1421	9.30633	-1.122	chr2L	20967746	21051772	84027	-	91	64	71	44	0.9785	0.9275	0.8765	0.6286	0.20045
cac	5_Junction_85087_Junction_85089	5_Junction_85087_Junction_85089	J001	0.0184392	46.6607	8.44032e-12	9.37371e-10	7.79962	10.0196	0.959717	chrX	11834075	11837134	3060	-	43	24	50	44	0.5443	0.5217	0.9804	0.9565	-0.43545
cac	5_Junction_85087_Junction_85089	5_Junction_85087_Junction_85089	J002	0.0206601	45.4051	1.60217e-11	1.69461e-09	7.36381	2.19394	-3.80254	chrX	11834075	11840526	6452	-	36	22	1	2	0.4557	0.4783	0.0196	0.0435	0.43545
RpS15Aa	5_Junction_86758_Junction_86759	5_Junction_86758_Junction_86759	J001	0.0252618	7.03612	0.00798817	0.0538796	15.193	13.9542	-0.442292	chrX	13231572	13231638	67	-	100	171	149	321	0.9091	0.868	0.8098	0.7465	0.1104
RpS15Aa	5_Junction_86758_Junction_86759	5_Junction_86758_Junction_86759	J002	0.0262041	6.88662	0.00868432	0.0572466	7.74239	9.50359	0.774162	chrX	13231572	13231642	71	-	10	26	35	109	0.0909	0.132	0.1902	0.2535	-0.1104
CG14408	5_Junction_90344_Junction_90345	5_Junction_90344_Junction_90345	J001	0.0796327	7.70282	0.00551346	0.0404999	11.3296	13.4944	0.809207	chrX	14722064	14722692	629	-	125	83	109	103	0.1908	0.174	0.3187	0.5309	-0.2424
CG14408	5_Junction_90344_Junction_90345	5_Junction_90344_Junction_90345	J002	0.079107	7.74939	0.00537307	0.0397769	17.3059	15.1574	-0.750525	chrX	14722064	14723167	1104	-	530	394	233	91	0.8092	0.826	0.6813	0.4691	0.2424
CG8974	5_Junction_91267_Junction_91269	5_Junction_91267_Junction_91269	J001	0.0411179	28.1873	1.10123e-07	4.57546e-06	4.47164	7.62182	1.77474	chrX	15689134	15689907	774	-	5	9	15	44	0.2083	0.2903	0.75	0.88	-0.5657
CG8974	5_Junction_91267_Junction_91269	5_Junction_91267_Junction_91269	J002	0.0431387	27.6692	1.43934e-07	5.81643e-06	7.15259	3.61286	-2.20817	chrX	15689134	15690033	900	-	19	22	5	6	0.7917	0.7097	0.25	0.12	0.5657
mmd	5_Junction_91845_Junction_91846_Junction_91849	5_Junction_91845_Junction_91846_Junction_91849	J001	0.244434	3.56354	0.0590615	0.22304	8.45246	7.36365	-0.502542	chrX	15848477	15852483	4007	-	62	33	27	10	0.7126	0.4648	0.403	0.1389	0.31775
mmd	5_Junction_91845_Junction_91846_Junction_91849	5_Junction_91845_Junction_91846_Junction_91849	J002	0.0431853	4.62322	0.031542	0.144905	4.92896	3.96122	-0.684853	chrX	15848477	15852522	4046	-	14	12	7	2	0.1609	0.169	0.1045	0.0278	0.0988
mmd	5_Junction_91845_Junction_91846_Junction_91849	5_Junction_91845_Junction_91846_Junction_91849	J003	0.342736	4.62114	0.0315803	0.14499	5.84554	10.4932	2.1463	chrX	15848477	15854838	6362	-	11	26	33	60	0.1264	0.3662	0.4925	0.8333	-0.4166
2018-09-04	5_Junction_93064_Junction_93066	5_Junction_93064_Junction_93066	J001	0.0684494	6.86775	0.0087765	0.0577145	10.8826	12.6943	0.689155	chrX	16580802	16581191	390	-	47	49	198	131	0.4052	0.3858	0.5706	0.7401	-0.25985
2018-09-04	5_Junction_93064_Junction_93066	5_Junction_93064_Junction_93066	J002	0.0686152	6.85421	0.00884325	0.0580425	12.5053	10.6874	-0.695722	chrX	16580802	16588074	7273	-	69	78	149	46	0.5948	0.6142	0.4294	0.2599	0.25985
ewg	5_Junction_93289_Junction_93290	5_Junction_93289_Junction_93290	J001	0.124503	4.83069	0.0279574	0.133051	4.96302	6.90309	1.09504	chrX	167425	167492	68	-	5	9	24	34	0.0338	0.0621	0.0992	0.2282	-0.11575
ewg	5_Junction_93289_Junction_93290	5_Junction_93289_Junction_93290	J002	0.118652	5.00682	0.0252477	0.12397	14.8526	12.9054	-0.703976	chrX	167425	167501	77	-	143	136	218	115	0.9662	0.9379	0.9008	0.7718	0.11575
Sh	5_Junction_94617_Junction_94619_Junction_94622	5_Junction_94617_Junction_94619_Junction_94622	J001	0.0349204	2.12559	0.144857	0.402035	10.3956	9.18146	-0.499063	chrX	17847379	17855664	8286	-	64	45	52	46	0.7356	0.5921	0.5714	0.5227	0.1168
Sh	5_Junction_94617_Junction_94619_Junction_94622	5_Junction_94617_Junction_94619_Junction_94622	J002	0.0206956	11.5852	0.000664781	0.00763165	4.01903	6.35315	1.47263	chrX	17847379	17887445	40067	-	6	5	22	17	0.069	0.0658	0.2418	0.1932	-0.1501
Sh	5_Junction_94617_Junction_94619_Junction_94622	5_Junction_94617_Junction_94619_Junction_94622	J003	0.074317	0.12546	0.723187	0.935547	7.36711	6.56879	-0.399325	chrX	17847379	17933116	85738	-	17	26	17	25	0.1954	0.3421	0.1868	0.2841	0.0333
Rab5	5_Junction_9790_Junction_9791_Junction_9794	5_Junction_9790_Junction_9791_Junction_9794	J001	0.0554589	3.16542	0.0752132	0.26326	11.5909	10.1605	-0.561135	chr2L	2361585	2364593	3009	-	46	55	62	127	0.4182	0.55	0.2696	0.3802	0.1592
Rab5	5_Junction_9790_Junction_9791_Junction_9794	5_Junction_9790_Junction_9791_Junction_9794	J002	0.0351508	15.887	6.72374e-05	0.00117723	7.49686	10.6835	1.36803	chr2L	2361585	2364639	3055	-	18	13	105	115	0.1636	0.13	0.4565	0.3443	-0.2536
Rab5	5_Junction_9790_Junction_9791_Junction_9794	5_Junction_9790_Junction_9791_Junction_9794	J003	0.0128432	3.48746	0.0618354	0.230032	10.5891	9.44324	-0.465865	chr2L	2361585	2364888	3304	-	46	32	63	92	0.4182	0.32	0.2739	0.2754	0.09445
stnA	5_Junction_99044_Junction_99046_Junction_99047	5_Junction_99044_Junction_99046_Junction_99047	J001	0.0396916	7.05227	0.00791649	0.0535081	4.30501	6.34943	1.25729	chrX	22397750	22406263	8514	-	8	7	13	20	0.0497	0.0556	0.2	0.1156	-0.10515
stnA	5_Junction_99044_Junction_99046_Junction_99047	5_Junction_99044_Junction_99046_Junction_99047	J002	0.0811628	0.0662694	0.796848	0.960582	8.05248	8.30252	0.113001	chrX	22397750	22406384	8635	-	44	21	11	52	0.2733	0.1667	0.1692	0.3006	-0.0149
stnA	5_Junction_99044_Junction_99046_Junction_99047	5_Junction_99044_Junction_99046_Junction_99047	J003	0.0274895	3.3499	0.0672093	0.244092	12.2073	11.1141	-0.417232	chrX	22397750	22406446	8697	-	109	98	41	101	0.677	0.7778	0.6308	0.5838	0.1201

## Sheet: AS A3SS events
Gene	AS_event_ID	AS_structure_ID	sub_junction_ID	sub-junction_dispersion_estimate	LRT_statistic-full_vs_reduced	LRT_p_value-full_vs_reduced	BH_adjusted_p-values	DN1	LNv	fitting_parameter_log2fold_change_LNv_DN1	sub_junction_chr	sub_junction_start_coor	sub_junction_end_coor	sub_junction_size	sub_junction_strand	raw_count.DN1_A	raw_count.DN1_B	raw_count.LNv_A	raw_count.LNv_B	percentage_usage.DN1_A	percentage_usage.DN1_B	percentage_usage.LNv_A	percentage_usage.LNv_B	deltaPSI
Fas2	3_Junction_103397_Junction_103406	3_Junction_103397_Junction_103406	J001	0.0329871	39.7706	2.85616e-10	2.24362e-08	10.441	13.8643	1.2916	chrX	4030803	4035802	5000	-	45	37	235	225	0.3814	0.4353	0.7993	0.8687	-0.42565
Fas2	3_Junction_103397_Junction_103406	3_Junction_103397_Junction_103406	J002	0.0337241	39.1712	3.88217e-10	2.94195e-08	11.8655	8.03476	-1.57409	chrX	4033350	4035802	2453	-	73	48	59	34	0.6186	0.5647	0.2007	0.1313	0.42565
NONE	3_Junction_104121_Junction_110492	3_Junction_104121_Junction_110492	J001	0.0113258	11.2746	0.00078573	0.0087455	8.55961	6.63817	-0.911572	chrX	4378	8775	4398	-	18	13	50	39	0.5625	0.5417	0.2924	0.2847	0.26355
NONE	3_Junction_104121_Junction_110492	3_Junction_104121_Junction_110492	J002	0.0107531	11.3933	0.000737094	0.00828539	7.87314	9.46325	0.696593	chrX	8709	8775	67	-	14	11	121	98	0.4375	0.4583	0.7076	0.7153	-0.26355
CG3714	3_Junction_11068_Junction_11072	3_Junction_11068_Junction_11072	J001	0.0253552	47.1313	6.63855e-12	7.51521e-10	6.11536	9.16161	1.44965	chr2L	4190824	4193308	2485	-	10	14	32	80	0.3125	0.4118	0.9143	0.9302	-0.5601
CG3714	3_Junction_11068_Junction_11072	3_Junction_11068_Junction_11072	J002	0.028754	45.2819	1.7062e-11	1.80169e-09	7.70618	3.03645	-2.99939	chr2L	4192968	4193308	341	-	22	20	3	6	0.6875	0.5882	0.0857	0.0698	0.5601
CG34449	3_Junction_111167_Junction_111168	3_Junction_111167_Junction_111168	J001	0.0963942	11.6455	0.000643574	0.00744124	3.11858	5.98046	2.04233	chrX	9232466	9232544	79	-	2	5	21	10	0.0408	0.1515	0.5122	0.3704	-0.34515
CG34449	3_Junction_111167_Junction_111168	3_Junction_111167_Junction_111168	J002	0.0856744	12.4264	0.000423299	0.00532027	8.75477	6.46458	-1.08746	chrX	9232481	9232544	64	-	47	28	20	17	0.9592	0.8485	0.4878	0.6296	0.34515
CG8475	3_Junction_14373_Junction_14378	3_Junction_14373_Junction_14378	J001	0.041437	13.4998	0.000238588	0.00333154	5.54829	3.37404	-1.55717	chr2L	8193707	8195019	1313	-	12	12	4	5	0.7059	0.8571	0.2667	0.2632	0.51655
CG8475	3_Junction_14373_Junction_14378	3_Junction_14373_Junction_14378	J002	0.0425763	13.414	0.000249759	0.00346425	3.12886	5.41019	1.7028	chr2L	8194528	8195019	492	-	5	2	11	14	0.2941	0.1429	0.7333	0.7368	-0.51655
gus	3_Junction_16213_Junction_16216	3_Junction_16213_Junction_16216	J001	0.0198649	12.6899	0.000367636	0.00474376	8.22499	9.49463	0.549174	chr2R	1009157	1009486	330	-	23	32	44	67	0.697	0.6531	0.88	0.9178	-0.22385
gus	3_Junction_16213_Junction_16216	3_Junction_16213_Junction_16216	J002	0.0240637	12.0558	0.000516318	0.00625865	6.14061	3.66877	-1.63813	chr2R	1009345	1009486	142	-	10	17	6	6	0.303	0.3469	0.12	0.0822	0.22385
tra2	3_Junction_16573_Junction_16574	3_Junction_16573_Junction_16574	J001	0.0309574	5.17365	0.022932	0.115863	8.59867	7.3665	-0.565683	chr2R	10491628	10491700	73	-	24	15	38	54	0.7273	0.75	0.4578	0.5745	0.2225
tra2	3_Junction_16573_Junction_16574	3_Junction_16573_Junction_16574	J002	0.0317165	5.12869	0.0235335	0.118011	5.63853	7.12069	0.79036	chr2R	10491633	10491700	68	-	9	5	45	40	0.2727	0.25	0.5422	0.4255	-0.2225
CG8963	3_Junction_18963_Junction_18964	3_Junction_18963_Junction_18964	J001	0.0310249	9.45749	0.00210288	0.0191814	10.6191	9.30549	-0.535556	chr2R	12906826	12906936	111	-	38	37	59	96	0.8636	0.9737	0.6941	0.75	0.1966
CG8963	3_Junction_18963_Junction_18964	3_Junction_18963_Junction_18964	J002	0.036246	9.00124	0.00269797	0.0234214	3.96391	6.27643	1.4742	chr2R	12906854	12906936	83	-	6	1	26	32	0.1364	0.0263	0.3059	0.25	-0.1966
Patronin	3_Junction_19339_Junction_19340	3_Junction_19339_Junction_19340	J001	0.0312028	8.11644	0.00438657	0.0342036	5.77196	3.70086	-1.40557	chr2R	13413918	13414337	420	-	19	13	1	8	0.2969	0.25	0.0333	0.1231	0.19525
Patronin	3_Junction_19339_Junction_19340	3_Junction_19339_Junction_19340	J002	0.0252421	8.587	0.00338572	0.0279385	8.59358	9.66909	0.457642	chr2R	13413921	13414337	417	-	45	39	29	57	0.7031	0.75	0.9667	0.8769	-0.19525
Liprin-gamma	3_Junction_23145_Junction_23150	3_Junction_23145_Junction_23150	J001	0.028863	5.60663	0.0178926	0.0973672	2.19451	4.27589	2.01007	chr2R	18232798	18247757	14960	-	1	1	11	14	0.05	0.0417	0.1897	0.1972	-0.1476
Liprin-gamma	3_Junction_23145_Junction_23150	3_Junction_23145_Junction_23150	J002	0.0211735	5.85909	0.0154968	0.0878244	8.66488	7.92871	-0.330051	chr2R	18234214	18247757	13544	-	19	23	47	57	0.95	0.9583	0.8103	0.8028	0.1476
Ars2	3_Junction_24191_Junction_24192	3_Junction_24191_Junction_24192	J001	0.0165935	21.612	3.33763e-06	9.00669e-05	12.2218	14.2754	0.752095	chr2R	1968539	1969239	701	-	150	101	123	146	0.3464	0.2806	0.5829	0.5348	-0.24535
Ars2	3_Junction_24191_Junction_24192	3_Junction_24191_Junction_24192	J002	0.016507	21.6904	3.2039e-06	8.67126e-05	15.3157	13.3877	-0.691097	chr2R	1968920	1969239	320	-	283	259	88	127	0.6536	0.7194	0.4171	0.4652	0.24535
Nxt1	3_Junction_24199_Junction_24200	3_Junction_24199_Junction_24200	J001	0.0208839	4.58979	0.032163	0.146753	9.15637	10.1594	0.414862	chr2R	19699247	19699316	70	-	22	37	63	102	0.5366	0.5781	0.6702	0.7556	-0.15555
Nxt1	3_Junction_24199_Junction_24200	3_Junction_24199_Junction_24200	J002	0.0218544	4.50211	0.0338531	0.151611	8.32125	7.05766	-0.593623	chr2R	19699260	19699316	57	-	19	27	31	33	0.4634	0.4219	0.3298	0.2444	0.15555
CG30423	3_Junction_25439_Junction_25460	3_Junction_25439_Junction_25460	J001	0.0325355	9.95383	0.00160515	0.0154551	7.57602	5.44082	-1.12682	chr2R	20734979	20763286	28308	-	13	17	11	31	0.2766	0.3864	0.1	0.1505	0.20625
CG30423	3_Junction_25439_Junction_25460	3_Junction_25439_Junction_25460	J002	0.0292367	10.3941	0.00126421	0.0127428	9.89621	11.3248	0.566271	chr2R	20763182	20763286	105	-	34	27	99	175	0.7234	0.6136	0.9	0.8495	-0.20625
wun	3_Junction_29608_Junction_29610	3_Junction_29608_Junction_29610	J001	0.0681038	6.42926	0.0112255	0.0692674	13.7599	12.0999	-0.612192	chr2R	5288653	5289912	1260	-	137	169	139	48	0.8509	0.8325	0.7316	0.5393	0.20625
wun	3_Junction_29608_Junction_29610	3_Junction_29608_Junction_29610	J002	0.0696656	6.3196	0.0119411	0.0724881	7.7652	9.53701	0.777435	chr2R	5289739	5289912	174	-	24	34	51	41	0.1491	0.1675	0.2684	0.4607	-0.20625
metro	3_Junction_31705_Junction_31710	3_Junction_31705_Junction_31710	J001	0.0664831	7.38225	0.00658708	0.0465548	9.29669	7.33393	-0.881473	chr2R	7115344	7115619	276	-	44	47	34	14	0.3964	0.5109	0.2656	0.1458	0.24795
metro	3_Junction_31705_Junction_31710	3_Junction_31705_Junction_31710	J002	0.0649669	7.50412	0.0061558	0.0441264	9.97394	11.8122	0.721038	chr2R	7115461	7115619	159	-	67	45	94	82	0.6036	0.4891	0.7344	0.8542	-0.24795
Sin3A	3_Junction_33320_Junction_33322	3_Junction_33320_Junction_33322	J001	0.0165363	11.1791	0.000827247	0.00911033	10.2885	11.8078	0.592231	chr2R	8464498	8466632	2135	-	40	39	126	143	0.4	0.4062	0.6528	0.572	-0.2093
Sin3A	3_Junction_33320_Junction_33322	3_Junction_33320_Junction_33322	J002	0.0166102	11.1535	0.000838721	0.00920354	11.7402	10.2074	-0.599183	chr2R	8466056	8466632	577	-	60	57	67	107	0.6	0.5938	0.3472	0.428	0.2093
Dh31-R	3_Junction_33957_Junction_33959	3_Junction_33957_Junction_33959	J001	0.0300316	19.5327	9.88913e-06	0.000232058	14.0787	11.7788	-0.848726	chr2R	9156598	9156895	298	-	98	79	171	152	0.8033	0.8876	0.5327	0.6056	0.2763
Dh31-R	3_Junction_33957_Junction_33959	3_Junction_33957_Junction_33959	J002	0.0305506	19.3292	1.10011e-05	0.000254262	8.0344	10.7949	1.16128	chr2R	9156613	9156895	283	-	24	10	150	99	0.1967	0.1124	0.4673	0.3944	-0.2763
CG42321	3_Junction_34004_Junction_34005_Junction_34006	3_Junction_34004_Junction_34005_Junction_34006	J001	0.0190064	0.497254	0.480709	0.791664	14.7376	15.0587	0.114035	chr2R	9303462	9306490	3029	-	152	156	235	262	0.5651	0.629	0.6695	0.6009	-0.03815
CG42321	3_Junction_34004_Junction_34005_Junction_34006	3_Junction_34004_Junction_34005_Junction_34006	J002	0.00928785	7.82647	0.00514864	0.0385007	12.7055	11.4427	-0.47603	chr2R	9304111	9306490	2380	-	104	82	84	114	0.3866	0.3306	0.2393	0.2615	0.1082
CG42321	3_Junction_34004_Junction_34005_Junction_34006	3_Junction_34004_Junction_34005_Junction_34006	J003	0.0306356	8.97551	0.00273622	0.0236928	5.80746	8.73356	1.43755	chr2R	9305333	9306490	1158	-	13	10	32	60	0.0483	0.0403	0.0912	0.1376	-0.0701
bbc	3_Junction_34071_Junction_34073_Junction_34079	3_Junction_34071_Junction_34073_Junction_34079	J001	0.0123859	62.2548	3.01769e-15	5.87255e-13	9.09032	12.5027	1.34843	chr2R	9376553	9378938	2386	-	40	50	118	83	0.2367	0.2732	0.6556	0.7155	-0.4306
bbc	3_Junction_34071_Junction_34073_Junction_34079	3_Junction_34071_Junction_34073_Junction_34079	J002	0.0238103	19.5081	1.00174e-05	0.000234727	7.10748	3.16526	-2.58684	chr2R	9377378	9378938	1561	-	20	28	3	4	0.1183	0.153	0.0167	0.0345	0.11005
bbc	3_Junction_34071_Junction_34073_Junction_34079	3_Junction_34071_Junction_34073_Junction_34079	J003	0.0218382	24.5013	7.4261e-07	2.41955e-05	12.2304	9.45502	-1.09281	chr2R	9378376	9378938	563	-	109	105	59	29	0.645	0.5738	0.3278	0.25	0.3205
shot	3_Junction_34456_Junction_34457	3_Junction_34456_Junction_34457	J001	0.0256216	3.96144	0.0465539	0.188991	8.41452	9.26739	0.36908	chr2R	9758843	9759482	640	-	61	59	32	19	0.7093	0.6705	0.7805	0.95	-0.17535
shot	3_Junction_34456_Junction_34457	3_Junction_34456_Junction_34457	J002	0.0292209	3.83978	0.0500501	0.198396	6.07281	4.69808	-0.833077	chr2R	9759230	9759482	253	-	25	29	9	1	0.2907	0.3295	0.2195	0.05	0.17535
CG9934	3_Junction_3539_Junction_3540	3_Junction_3539_Junction_3540	J001	0.171104	5.14341	0.0233347	0.117291	3.59609	5.91027	1.57165	chr2L	13018174	13018788	615	-	3	3	11	36	0.1071	0.1154	0.2558	0.5625	-0.2979
CG9934	3_Junction_3539_Junction_3540	3_Junction_3539_Junction_3540	J002	0.165025	5.27572	0.0216249	0.111009	8.84664	6.52467	-1.09577	chr2L	13018177	13018788	612	-	25	23	32	28	0.8929	0.8846	0.7442	0.4375	0.2979
GlcAT-P	3_Junction_36429_Junction_36432	3_Junction_36429_Junction_36432	J001	0.0175359	36.9778	1.19485e-09	8.0005e-08	7.45824	2.92671	-2.99245	chr3L	11172816	11176732	3917	-	31	23	3	3	0.2263	0.2527	0.0291	0.0229	0.2135
GlcAT-P	3_Junction_36429_Junction_36432	3_Junction_36429_Junction_36432	J002	0.0149238	38.5294	5.39347e-10	3.96141e-08	11.4421	12.9797	0.57749	chr3L	11175743	11176732	990	-	106	68	100	128	0.7737	0.7473	0.9709	0.9771	-0.2135
fax	3_Junction_40284_Junction_40290	3_Junction_40284_Junction_40290	J001	0.0494499	21.2681	3.99312e-06	0.000105478	6.81708	3.42451	-2.20363	chr3L	16396414	16398219	1806	-	7	8	13	11	0.875	0.8	0.1548	0.25	0.6351
fax	3_Junction_40284_Junction_40290	3_Junction_40284_Junction_40290	J002	0.0427548	22.097	2.59211e-06	7.20311e-05	3.29215	6.628	2.22617	chr3L	16396643	16398219	1577	-	1	2	71	33	0.125	0.2	0.8452	0.75	-0.6351
fax	3_Junction_40305_Junction_40306	3_Junction_40305_Junction_40306	J001	0.00591116	84.3744	4.09422e-20	1.47332e-17	24.5824	22.4478	-0.717283	chr3L	16398936	16400119	1184	-	1411	1256	2164	1308	0.8891	0.9062	0.7199	0.739	0.1682
fax	3_Junction_40305_Junction_40306	3_Junction_40305_Junction_40306	J002	0.00593981	84.0751	4.76321e-20	1.70454e-17	15.4083	18.2841	0.998633	chr3L	16398945	16400119	1175	-	176	130	842	462	0.1109	0.0938	0.2801	0.261	-0.1682
tra	3_Junction_40514_Junction_40515	3_Junction_40514_Junction_40515	J001	0.0254311	20.515	5.91669e-06	0.000148932	8.98224	6.49195	-1.1713	chr3L	16583855	16584102	248	-	30	16	37	28	0.8333	0.6957	0.3936	0.3294	0.403
tra	3_Junction_40514_Junction_40515	3_Junction_40514_Junction_40515	J002	0.0251432	20.598	5.66541e-06	0.000143652	5.35364	8.16856	1.45331	chr3L	16584030	16584102	73	-	6	7	57	57	0.1667	0.3043	0.6064	0.6706	-0.403
Krn	3_Junction_41353_Junction_41355	3_Junction_41353_Junction_41355	J001	0.0160326	9.07669	0.00258888	0.0226759	12.0234	11.0899	-0.357373	chr3L	17642346	17647090	4745	-	91	66	103	77	0.9192	0.9041	0.763	0.8105	0.1249
Krn	3_Junction_41353_Junction_41355	3_Junction_41353_Junction_41355	J002	0.0185528	8.67003	0.00323485	0.0269769	4.79095	6.84224	1.17669	chr3L	17643726	17647090	3365	-	8	7	32	18	0.0808	0.0959	0.237	0.1895	-0.1249
Mkp	3_Junction_41660_Junction_41661	3_Junction_41660_Junction_41661	J001	0.0233227	6.58792	0.0102673	0.0648517	5.5851	3.83129	-1.19123	chr3L	184067	184130	64	-	14	10	6	6	0.3784	0.3448	0.1622	0.1429	0.20905
Mkp	3_Junction_41660_Junction_41661	3_Junction_41660_Junction_41661	J002	0.0196499	6.84854	0.00887137	0.0581678	7.09497	8.11565	0.48252	chr3L	184072	184130	59	-	23	19	31	36	0.6216	0.6552	0.8378	0.8571	-0.20905
CG10424	3_Junction_42356_Junction_42357	3_Junction_42356_Junction_42357	J001	0.100573	4.19134	0.040631	0.1724	8.47929	6.96591	-0.709605	chr3L	19090327	19090404	78	-	21	24	22	44	0.7778	0.8276	0.4231	0.6667	0.2578
CG10424	3_Junction_42356_Junction_42357	3_Junction_42356_Junction_42357	J002	0.104078	4.10543	0.0427457	0.178434	4.64902	6.27276	0.975024	chr3L	19090337	19090404	68	-	6	5	30	22	0.2222	0.1724	0.5769	0.3333	-0.2578
Su(Tpl)	3_Junction_42976_Junction_42980	3_Junction_42976_Junction_42980	J001	0.0151896	12.7621	0.000353712	0.004588	5.53657	7.9237	1.2322	chr3L	19890508	19902345	11838	-	7	3	24	123	0.2258	0.1875	0.5455	0.5212	-0.3267
Su(Tpl)	3_Junction_42976_Junction_42980	3_Junction_42976_Junction_42980	J002	0.0150742	12.7835	0.000349681	0.00454487	9.41369	7.61338	-0.79718	chr3L	19890513	19902345	11833	-	24	13	20	113	0.7742	0.8125	0.4545	0.4788	0.3267
NONE	3_Junction_43368_Junction_43401	3_Junction_43368_Junction_43401	J001	0.0307119	16.9307	3.87694e-05	0.000746575	5.45367	2.25336	-2.70597	chr3L	2025069	2029433	4365	-	14	16	1	2	0.3784	0.4444	0.0435	0.0714	0.35395
NONE	3_Junction_43368_Junction_43401	3_Junction_43368_Junction_43401	J002	0.0257178	17.5704	2.76868e-05	0.000561884	6.36857	7.95288	0.780116	chr3L	2028442	2029433	992	-	23	20	22	26	0.6216	0.5556	0.9565	0.9286	-0.35395
CG33054	3_Junction_44224_Junction_44239	3_Junction_44224_Junction_44239	J001	0.0213287	12.4542	0.00041706	0.0052567	7.54833	9.23326	0.75206	chr3L	21191203	21195846	4644	-	33	26	37	41	0.5	0.4194	0.7872	0.7069	-0.28735
CG33054	3_Junction_44224_Junction_44239	3_Junction_44224_Junction_44239	J002	0.0219934	12.3184	0.000448524	0.00557637	8.04996	6.02584	-1.01051	chr3L	21193614	21195846	2233	-	33	36	10	17	0.5	0.5806	0.2128	0.2931	0.28735
osp	3_Junction_4567_Junction_4604_Junction_4626	3_Junction_4567_Junction_4604_Junction_4626	J001	0.161591	10.3523	0.00129311	0.0129927	13.6423	16.9136	1.15727	chr2L	14684824	14890008	205185	-	143	285	222	196	0.2061	0.4286	0.8192	0.6782	-0.43135
osp	3_Junction_4567_Junction_4604_Junction_4626	3_Junction_4567_Junction_4604_Junction_4626	J002	0.216247	9.09573	0.00256206	0.0224994	16.2296	11.302	-1.79288	chr2L	14810469	14890008	79540	-	523	321	29	72	0.7536	0.4827	0.107	0.2491	0.4401
osp	3_Junction_4567_Junction_4604_Junction_4626	3_Junction_4567_Junction_4604_Junction_4626	J003	0.0740702	0.191955	0.661295	0.906331	7.87539	8.12783	0.115564	chr2L	14882124	14890008	7885	-	28	59	20	21	0.0403	0.0887	0.0738	0.0727	-0.00875
Spn	3_Junction_46517_Junction_46521	3_Junction_46517_Junction_46521	J001	0.104742	5.88265	0.0152908	0.0869366	8.58859	10.7618	0.900071	chr3L	2508907	2511161	2255	-	47	48	74	30	0.4747	0.5854	0.881	0.6977	-0.2593
Spn	3_Junction_46517_Junction_46521	3_Junction_46517_Junction_46521	J002	0.10676	5.79461	0.0160754	0.0901201	8.22133	6.01155	-1.0961	chr3L	2510575	2511161	587	-	52	34	10	13	0.5253	0.4146	0.119	0.3023	0.2593
dikar	3_Junction_50405_Junction_50406	3_Junction_50405_Junction_50406	J001	0.00955394	18.1968	1.99216e-05	0.000422009	8.84523	10.6173	0.731181	chr3L	6730772	6731802	1031	-	61	47	62	33	0.4207	0.4234	0.6813	0.7021	-0.26965
dikar	3_Junction_50405_Junction_50406	3_Junction_50405_Junction_50406	J002	0.00957155	18.1869	2.00254e-05	0.000423756	9.92706	7.92297	-0.86499	chr3L	6731198	6731802	605	-	84	64	29	14	0.5793	0.5766	0.3187	0.2979	0.26965
Pdp1	3_Junction_51404_Junction_51414_Junction_51428	3_Junction_51404_Junction_51414_Junction_51428	J001	0.0138602	123.705	9.77441e-29	7.67816e-26	15.4807	10.9284	-1.67543	chr3L	7824910	7825652	743	-	160	125	91	134	0.884	0.8389	0.3383	0.2945	0.54505
Pdp1	3_Junction_51404_Junction_51414_Junction_51428	3_Junction_51404_Junction_51414_Junction_51428	J002	0.01626	109.885	1.03843e-25	6.13662e-23	8.09376	13.8113	2.26655	chr3L	7824927	7825652	726	-	18	21	167	307	0.0994	0.1409	0.6208	0.6747	-0.5276
Pdp1	3_Junction_51404_Junction_51414_Junction_51428	3_Junction_51404_Junction_51414_Junction_51428	J003	0.0262231	1.83196	0.175896	0.454	3.55262	4.48	0.716282	chr3L	7825178	7825652	475	-	3	3	11	14	0.0166	0.0201	0.0409	0.0308	-0.0175
bol	3_Junction_52776_Junction_52778	3_Junction_52776_Junction_52778	J001	0.105563	6.9929	0.00818335	0.0547944	15.8133	13.2347	-0.922118	chr3L	9099617	9100440	824	-	311	278	95	120	0.836	0.7787	0.4167	0.6557	0.27115
bol	3_Junction_52776_Junction_52778	3_Junction_52776_Junction_52778	J002	0.106277	6.94905	0.00838639	0.0557886	10.2646	12.8234	0.98205	chr3L	9100255	9100440	186	-	61	79	133	63	0.164	0.2213	0.5833	0.3443	-0.27115
bol	3_Junction_52781_Junction_52782	3_Junction_52781_Junction_52782	J001	0.0101927	13.898	0.000193007	0.00280197	14.1622	12.7046	-0.531471	chr3L	9100795	9101054	260	-	231	206	112	58	0.5789	0.6077	0.3875	0.4603	0.1694
bol	3_Junction_52781_Junction_52782	3_Junction_52781_Junction_52782	J002	0.0102191	13.8761	0.000195269	0.0028297	12.6764	14.1394	0.533723	chr3L	9100810	9101054	245	-	168	133	177	68	0.4211	0.3923	0.6125	0.5397	-0.1694
Nf-YA	3_Junction_53468_Junction_53469	3_Junction_53468_Junction_53469	J001	0.0176183	11.5062	0.000693662	0.00790964	12.6388	11.3546	-0.485183	chr3L	9432660	9435222	2563	-	82	90	87	117	0.8454	0.8411	0.6259	0.7048	0.1779
Nf-YA	3_Junction_53468_Junction_53469	3_Junction_53468_Junction_53469	J002	0.0186381	11.2291	0.000805239	0.00890908	6.85286	8.84566	0.926672	chr3L	9435066	9435222	157	-	15	17	52	49	0.1546	0.1589	0.3741	0.2952	-0.1779
dpr9	3_Junction_55544_Junction_55547	3_Junction_55544_Junction_55547	J001	0.00906547	21.5414	3.46266e-06	9.29349e-05	12.8499	10.8499	-0.759528	chr3R	10887349	10888071	723	-	63	51	201	87	0.5833	0.573	0.3226	0.3655	0.2341
dpr9	3_Junction_55544_Junction_55547	3_Junction_55544_Junction_55547	J002	0.00896853	21.643	3.28404e-06	8.8807e-05	11.6318	13.4727	0.685333	chr3R	10887367	10888071	705	-	45	38	422	151	0.4167	0.427	0.6774	0.6345	-0.2341
NONE	3_Junction_58237_Junction_58238	3_Junction_58237_Junction_58238	J001	0.0625055	5.81302	0.015908	0.0894307	5.02549	7.40154	1.29994	chr3R	13950646	13955255	4610	-	34	65	9	1	0.1943	0.2234	0.75	0.1667	-0.2495
NONE	3_Junction_58237_Junction_58238	3_Junction_58237_Junction_58238	J002	0.050592	6.34039	0.0118019	0.0719452	8.68927	6.76956	-0.900999	chr3R	13950650	13955255	4606	-	141	226	3	5	0.8057	0.7766	0.25	0.8333	0.2495
Stat92E	3_Junction_60769_Junction_60770_Junction_60771	3_Junction_60769_Junction_60770_Junction_60771	J001	0.0633686	8.68939	0.00320068	0.0267508	8.04253	10.6714	1.10886	chr3R	16363185	16364941	1757	-	20	40	60	72	0.2439	0.396	0.6742	0.5625	-0.2984
Stat92E	3_Junction_60769_Junction_60770_Junction_60771	3_Junction_60769_Junction_60770_Junction_60771	J002	0.0615757	4.55033	0.0329124	0.148972	9.72178	8.80342	-0.387815	chr3R	16363678	16364941	1264	-	52	49	25	52	0.6341	0.4851	0.2809	0.4062	0.21605
Stat92E	3_Junction_60769_Junction_60770_Junction_60771	3_Junction_60769_Junction_60770_Junction_60771	J003	0.0238771	7.60683	0.00581475	0.0422125	5.22824	3.26176	-1.46657	chr3R	16364437	16364941	505	-	10	12	4	4	0.122	0.1188	0.0449	0.0312	0.08235
Stat92E	3_Junction_60773_Junction_60774	3_Junction_60773_Junction_60774	J001	0.00890989	19.0765	1.25584e-05	0.000284336	9.46645	11.2546	0.7166	chr3R	16365057	16365120	64	-	64	50	61	67	0.3787	0.3876	0.604	0.6505	-0.2441
Stat92E	3_Junction_60773_Junction_60774	3_Junction_60773_Junction_60774	J002	0.00886936	19.1068	1.23607e-05	0.000280451	11.1838	9.37852	-0.725994	chr3R	16365078	16365120	43	-	105	79	40	36	0.6213	0.6124	0.396	0.3495	0.2441
CG13625	3_Junction_65099_Junction_65323_Junction_65325	3_Junction_65099_Junction_65323_Junction_65325	J001	0.189245	3.09341	0.0786097	0.271245	3.89053	6.5762	1.69021	chr3R	20250824	20440083	189260	-	13	39	2	6	0.1102	0.269	0.3333	0.6	-0.27705
CG13625	3_Junction_65099_Junction_65323_Junction_65325	3_Junction_65099_Junction_65323_Junction_65325	J002	0.0568498	0.193298	0.660186	0.905886	5.5239	5.79609	0.157988	chr3R	20410730	20440083	29354	-	61	55	3	3	0.5169	0.3793	0.5	0.3	0.0481
CG13625	3_Junction_65099_Junction_65323_Junction_65325	3_Junction_65099_Junction_65323_Junction_65325	J003	0.0149349	3.99078	0.0457498	0.186725	5.06069	3.5052	-1.14366	chr3R	20410733	20440083	29351	-	44	51	1	1	0.3729	0.3517	0.1667	0.1	0.22895
CG42724	3_Junction_66706_Junction_66712	3_Junction_66706_Junction_66712	J001	0.121286	6.34676	0.0117596	0.0717727	6.70857	8.96834	1.05298	chr3R	2188952	2190724	1773	-	34	13	27	42	0.3036	0.1413	0.4426	0.6176	-0.30765
CG42724	3_Junction_66706_Junction_66712	3_Junction_66706_Junction_66712	J002	0.119165	6.43599	0.0111831	0.0690608	10.7364	8.4793	-0.938264	chr3R	2190447	2190724	278	-	78	79	34	26	0.6964	0.8587	0.5574	0.3824	0.30765
CG31064	3_Junction_67739_Junction_67742	3_Junction_67739_Junction_67742	J001	0.0256309	11.6198	0.000652529	0.00751914	6.92398	9.11246	1.0053	chr3R	23056387	23058193	1807	-	11	12	80	76	0.1209	0.1765	0.3828	0.3052	-0.1953
CG31064	3_Junction_67739_Junction_67742	3_Junction_67739_Junction_67742	J002	0.024872	11.7977	0.000593033	0.00696438	13.0698	11.4955	-0.590181	chr3R	23057921	23058193	273	-	80	56	129	173	0.8791	0.8235	0.6172	0.6948	0.1953
Fer1HCH	3_Junction_70808_Junction_70811	3_Junction_70808_Junction_70811	J001	0.00517638	13.339	0.000259943	0.00357471	14.2737	13.141	-0.410655	chr3R	26213272	26213495	224	-	82	90	170	321	0.6721	0.6767	0.512	0.5237	0.15655
Fer1HCH	3_Junction_70808_Junction_70811	3_Junction_70808_Junction_70811	J002	0.00520132	13.318	0.000262869	0.00360879	11.4273	12.8319	0.528709	chr3R	26213324	26213495	172	-	40	43	162	292	0.3279	0.3233	0.488	0.4763	-0.15655
Best1	3_Junction_75001_Junction_75003	3_Junction_75001_Junction_75003	J001	0.0302428	35.0545	3.20597e-09	1.97239e-07	9.2948	11.9766	1.06447	chr3R	5988032	5988919	888	-	52	79	80	47	0.52	0.627	0.9412	0.94	-0.3671
Best1	3_Junction_75001_Junction_75003	3_Junction_75001_Junction_75003	J002	0.0317443	34.3354	4.63863e-09	2.75132e-07	8.19349	3.93091	-2.43892	chr3R	5988799	5988919	121	-	48	47	5	3	0.48	0.373	0.0588	0.06	0.3671
ctrip	3_Junction_75325_Junction_75352	3_Junction_75325_Junction_75352	J001	0.0318834	3.90053	0.048271	0.193643	7.10175	6.17816	-0.477658	chr3R	627713	637703	9991	-	17	23	13	23	0.7391	0.8519	0.5417	0.6389	0.2052
ctrip	3_Junction_75325_Junction_75352	3_Junction_75325_Junction_75352	J002	0.0375653	3.73241	0.0533662	0.207642	3.82106	5.1655	0.945909	chr3R	634996	637703	2708	-	6	4	11	13	0.2609	0.1481	0.4583	0.3611	-0.2052
Jupiter	3_Junction_76246_Junction_76249	3_Junction_76246_Junction_76249	J001	0.0078742	15.8437	6.87938e-05	0.00119862	14.816	13.3967	-0.510778	chr3R	7429961	7430306	346	-	142	123	201	191	0.4948	0.4642	0.3448	0.3051	0.15455
Jupiter	3_Junction_76246_Junction_76249	3_Junction_76246_Junction_76249	J002	0.00782659	15.9007	6.67536e-05	0.00117003	15.1503	16.3835	0.432948	chr3R	7430005	7430306	302	-	145	142	382	435	0.5052	0.5358	0.6552	0.6949	-0.15455
NfI	3_Junction_80327_Junction_80328	3_Junction_80327_Junction_80328	J001	0.0140451	4.38178	0.036325	0.159248	7.79833	6.59432	-0.590101	chr4	292786	292850	65	-	38	31	19	12	0.3762	0.3263	0.2375	0.2069	0.12905
NfI	3_Junction_80327_Junction_80328	3_Junction_80327_Junction_80328	J002	0.0131865	4.46708	0.0345539	0.153721	9.83546	10.6091	0.311512	chr4	292798	292850	53	-	63	64	61	46	0.6238	0.6737	0.7625	0.7931	-0.12905
Lin29	3_Junction_80570_Junction_80572	3_Junction_80570_Junction_80572	J001	0.0272628	4.50149	0.0338654	0.151644	3.76362	5.35827	1.11078	chr4	399154	399340	187	-	11	10	6	6	0.1111	0.1124	0.2069	0.3333	-0.15835
Lin29	3_Junction_80570_Junction_80572	3_Junction_80570_Junction_80572	J002	0.0209263	4.73142	0.0296164	0.138488	9.15297	8.37016	-0.340391	chr4	399187	399340	154	-	88	79	23	12	0.8889	0.8876	0.7931	0.6667	0.15835
NONE	3_Junction_82215_Junction_82217	3_Junction_82215_Junction_82217	J001	0.0720156	5.53951	0.0185918	0.0999894	17.8336	15.7328	-0.729692	chrM	13350	14616	1267	-	2037	343	10	156	0.8217	0.7072	0.4545	0.5954	0.2395
NONE	3_Junction_82215_Junction_82217	3_Junction_82215_Junction_82217	J002	0.0723496	5.52055	0.0187944	0.100768	12.2106	14.3317	0.776529	chrM	13424	14616	1193	-	442	142	12	106	0.1783	0.2928	0.5455	0.4046	-0.2395
CR44894	3_Junction_82692_Junction_82710	3_Junction_82692_Junction_82710	J001	0.252751	4.80656	0.0283515	0.134262	12.7156	8.97976	-1.47477	chrX	10029196	10045146	15951	-	114	27	74	63	0.8837	0.6585	0.2814	0.5575	0.35165
CR44894	3_Junction_82692_Junction_82710	3_Junction_82692_Junction_82710	J002	0.252973	4.80255	0.0284177	0.134461	7.33523	10.8955	1.52892	chrX	10041451	10045146	3696	-	15	14	189	50	0.1163	0.3415	0.7186	0.4425	-0.35165
Rph	3_Junction_83868_Junction_83870	3_Junction_83868_Junction_83870	J001	0.0210597	18.7052	1.5257e-05	0.000335528	7.76354	9.32691	0.690339	chrX	10645815	10647244	1430	-	31	27	66	22	0.6327	0.6279	0.9429	0.88	-0.28115
Rph	3_Junction_83868_Junction_83870	3_Junction_83868_Junction_83870	J002	0.0252432	17.7874	2.4701e-05	0.000508499	6.2236	3.11147	-2.18259	chrX	10646528	10647244	717	-	18	16	4	3	0.3673	0.3721	0.0571	0.12	0.28115
CG1637	3_Junction_84067_Junction_84077	3_Junction_84067_Junction_84077	J001	0.00568093	6.48777	0.0108619	0.0675995	13.0864	13.8331	0.272026	chrX	10766072	10771446	5375	-	115	92	160	203	0.5838	0.5644	0.678	0.6812	-0.1055
CG1637	3_Junction_84067_Junction_84077	3_Junction_84067_Junction_84077	J002	0.0057684	6.45193	0.0110832	0.0686388	11.92	10.9302	-0.380594	chrX	10770029	10771446	1418	-	82	71	76	95	0.4162	0.4356	0.322	0.3188	0.1055
hep	3_Junction_86433_Junction_86435	3_Junction_86433_Junction_86435	J001	0.0481109	6.51333	0.0107069	0.0669457	8.92883	7.16774	-0.805794	chrX	12977131	12979627	2497	-	61	37	15	23	0.4552	0.3033	0.1705	0.2018	0.1931
hep	3_Junction_86433_Junction_86435	3_Junction_86433_Junction_86435	J002	0.0469444	6.62333	0.0100652	0.0638582	10.6676	12.198	0.588618	chrX	12978603	12979627	1025	-	73	85	73	91	0.5448	0.6967	0.8295	0.7982	-0.1931
Rbp1-like	3_Junction_86849_Junction_86874	3_Junction_86849_Junction_86874	J001	0.0195294	16.7117	4.35111e-05	0.000825544	14.2996	12.3334	-0.718973	chrX	13275076	13278331	3256	-	261	163	119	48	0.3325	0.2753	0.1662	0.128	0.1568
Rbp1-like	3_Junction_86849_Junction_86874	3_Junction_86849_Junction_86874	J002	0.0193829	16.8091	4.13356e-05	0.000788682	17.6645	19.3273	0.569626	chrX	13277656	13278331	676	-	524	429	597	327	0.6675	0.7247	0.8338	0.872	-0.1568
AMPdeam	3_Junction_87531_Junction_87533	3_Junction_87531_Junction_87533	J001	0.0105268	11.9856	0.000536143	0.00643832	12.3459	11.2915	-0.400417	chrX	13727055	13728846	1792	-	116	100	102	48	0.8406	0.8621	0.6939	0.6857	0.16155
AMPdeam	3_Junction_87531_Junction_87533	3_Junction_87531_Junction_87533	J002	0.0114085	11.6949	0.000626707	0.00728809	6.48962	8.46672	0.947898	chrX	13727064	13728846	1783	-	22	16	45	22	0.1594	0.1379	0.3061	0.3143	-0.16155
Mur2B	3_Junction_89517_Junction_90181	3_Junction_89517_Junction_90181	J001	0.0205068	5.56455	0.0183277	0.0989989	5.2559	7.04037	0.979442	chrX	1466031	1501921	35891	-	46	52	6	4	0.3172	0.3611	0.8571	0.5	-0.3394
Mur2B	3_Junction_89517_Junction_90181	3_Junction_89517_Junction_90181	J002	0.0193667	5.60197	0.0179403	0.0974869	6.99727	5.22552	-0.97672	chrX	1466860	1501921	35062	-	99	92	1	4	0.6828	0.6389	0.1429	0.5	0.3394
mmd	3_Junction_91875_Junction_91884	3_Junction_91875_Junction_91884	J001	0.0593662	7.73604	0.00541292	0.0399711	13.7607	11.8415	-0.710085	chrX	15852623	15856017	3395	-	245	168	75	56	0.8627	0.8317	0.7353	0.5545	0.2023
mmd	3_Junction_91875_Junction_91884	3_Junction_91875_Junction_91884	J002	0.0610369	7.56896	0.00593819	0.0429151	7.57566	9.68197	0.92653	chrX	15854945	15856017	1073	-	39	34	27	45	0.1373	0.1683	0.2647	0.4455	-0.2023
Tob	3_Junction_92095_Junction_92096	3_Junction_92095_Junction_92096	J001	0.0233702	7.4456	0.00635916	0.0452218	4.80749	2.34504	-2.1828	chrX	15974735	15974835	101	-	20	17	1	1	0.1739	0.1977	0.0333	0.0435	0.1474
Tob	3_Junction_92095_Junction_92096	3_Junction_92095_Junction_92096	J002	0.0186486	7.68388	0.00557163	0.0408062	8.95009	9.77069	0.344644	chrX	15974738	15974835	98	-	95	69	29	22	0.8261	0.8023	0.9667	0.9565	-0.1474
if	3_Junction_93171_Junction_93306	3_Junction_93171_Junction_93306	J001	0.112874	6.12399	0.013336	0.0785212	6.63718	8.65679	0.954735	chrX	16655108	16827820	172713	-	37	88	12	10	0.4868	0.6984	0.9231	0.9091	-0.3235
if	3_Junction_93171_Junction_93306	3_Junction_93171_Junction_93306	J002	0.115977	6.05514	0.0138659	0.0808069	5.31519	3.00794	-1.76375	chrX	16762327	16827820	65494	-	39	38	1	1	0.5132	0.3016	0.0769	0.0909	0.3235
CoVIb	3_Junction_97153_Junction_97157_Junction_97162	3_Junction_97153_Junction_97157_Junction_97162	J001	0.0778722	6.54064	0.0105438	0.0662019	15.371	13.1179	-0.809354	chrX	19635198	19638293	3096	-	254	225	152	81	0.4387	0.382	0.2676	0.1371	0.208
CoVIb	3_Junction_97153_Junction_97157_Junction_97162	3_Junction_97153_Junction_97157_Junction_97162	J002	0.0035368	8.24178	0.00409369	0.0324064	13.81	13.3294	-0.174676	chrX	19635201	19638293	3093	-	159	166	119	125	0.2746	0.2818	0.2095	0.2115	0.0677
CoVIb	3_Junction_97153_Junction_97157_Junction_97162	3_Junction_97153_Junction_97157_Junction_97162	J003	0.0398418	14.9664	0.000109441	0.00176415	14.2965	17.5412	1.13833	chrX	19635235	19638293	3059	-	166	198	297	385	0.2867	0.3362	0.5229	0.6514	-0.2757
shakB	3_Junction_97751_Junction_97970	3_Junction_97751_Junction_97970	J001	0.083726	12.9509	0.00031977	0.00422777	4.00112	7.102	1.87003	chrX	20364382	20745575	381194	-	9	6	17	20	0.125	0.0408	0.34	0.3509	-0.26255
shakB	3_Junction_97751_Junction_97970	3_Junction_97751_Junction_97970	J002	0.0763344	13.746	0.000209268	0.0029955	11.6763	9.11938	-1.02475	chrX	20735832	20745575	9744	-	63	141	33	37	0.875	0.9592	0.66	0.6491	0.26255
ptr	3_Junction_98924_Junction_99023	3_Junction_98924_Junction_99023	J001	0.0229095	9.5517	0.00199764	0.0183849	7.91521	6.12253	-0.895516	chrX	2226308	2256803	30496	-	33	31	11	18	0.5893	0.4769	0.2895	0.2647	0.256
ptr	3_Junction_98924_Junction_99023	3_Junction_98924_Junction_99023	J002	0.0221856	9.66776	0.0018753	0.0174838	7.57717	9.08197	0.674166	chrX	2239341	2256803	17463	-	23	34	27	50	0.4107	0.5231	0.7105	0.7353	-0.256
N	5_Junction_101867_Junction_101869_Junction_101874	5_Junction_101867_Junction_101869_Junction_101874	J001	0.413571	6.4992	0.0107923	0.0672836	8.52463	3.01183	-3.39558	chrX	3041080	3054455	13376	+	10	65	1	5	0.1111	0.4452	0.0096	0.0325	0.2571
N	5_Junction_101867_Junction_101869_Junction_101874	5_Junction_101867_Junction_101869_Junction_101874	J002	0.141725	7.8025	0.00521739	0.0388954	10.1269	13.147	1.15668	chrX	3041080	3054782	13703	+	63	63	87	139	0.7	0.4315	0.8365	0.9026	-0.3038
N	5_Junction_101867_Junction_101869_Junction_101874	5_Junction_101867_Junction_101869_Junction_101874	J003	0.0914073	0.774072	0.37896	0.703185	6.11671	5.88435	-0.129069	chrX	3041080	3084324	43245	+	17	18	16	10	0.1889	0.1233	0.1538	0.0649	0.04675
AstA-R1	5_Junction_102763_Junction_102764	5_Junction_102763_Junction_102764	J001	0.020511	34.8398	3.57979e-09	2.18154e-07	4.38178	8.3156	2.15684	chrX	3521774	3533249	11476	+	10	10	29	21	0.1031	0.0667	0.4394	0.3818	-0.3257
AstA-R1	5_Junction_102763_Junction_102764	5_Junction_102763_Junction_102764	J002	0.0179363	36.5266	1.50595e-09	9.90851e-08	11.6596	9.49223	-0.861367	chrX	3521774	3537524	15751	+	87	140	37	34	0.8969	0.9333	0.5606	0.6182	0.3257
Mnt	5_Junction_102828_Junction_102829_Junction_102832	5_Junction_102828_Junction_102829_Junction_102832	J001	0.0446189	0.482479	0.487301	0.796959	10.5246	9.3575	-0.476176	chrX	3587965	3592149	4185	+	56	63	58	39	0.3916	0.5207	0.3473	0.4535	0.05575
Mnt	5_Junction_102828_Junction_102829_Junction_102832	5_Junction_102828_Junction_102829_Junction_102832	J002	0.0301251	8.11449	0.00439129	0.0342322	5.35433	7.23928	1.01719	chrX	3587965	3592371	4407	+	12	10	28	22	0.0839	0.0826	0.1677	0.2558	-0.1285
Mnt	5_Junction_102828_Junction_102829_Junction_102832	5_Junction_102828_Junction_102829_Junction_102832	J003	0.0874671	0.392771	0.530846	0.82602	10.5846	9.63536	-0.384178	chrX	3587965	3592776	4812	+	75	48	81	25	0.5245	0.3967	0.485	0.2907	0.07275
norpA	5_Junction_103523_Junction_103524	5_Junction_103523_Junction_103524	J001	0.0306677	8.45905	0.00363232	0.0294713	4.68442	2.1039	-2.42057	chrX	4217188	4219379	2192	+	16	12	1	1	0.1391	0.1062	0.0169	0.0263	0.10105
norpA	5_Junction_103523_Junction_103524	5_Junction_103523_Junction_103524	J002	0.0223187	8.96343	0.00275437	0.0238211	10.4515	11.2088	0.297378	chrX	4217188	4226827	9640	+	99	101	58	37	0.8609	0.8938	0.9831	0.9737	-0.10105
SK	5_Junction_105505_Junction_105506_Junction_105508	5_Junction_105505_Junction_105506_Junction_105508	J001	0.0101727	5.82206	0.0158264	0.089151	12.9484	13.2302	0.103471	chrX	5292795	5293563	769	+	98	152	111	135	0.7259	0.6756	0.7986	0.8036	-0.10035
SK	5_Junction_105505_Junction_105506_Junction_105508	5_Junction_105505_Junction_105506_Junction_105508	J002	0.0233254	2.89147	0.0890499	0.29316	6.66044	7.74934	0.533085	chrX	5292795	5293566	772	+	11	29	21	32	0.0815	0.1289	0.1511	0.1905	-0.0656
SK	5_Junction_105505_Junction_105506_Junction_105508	5_Junction_105505_Junction_105506_Junction_105508	J003	0.137295	12.1213	0.000498489	0.0060987	8.3764	3.3293	-3.02791	chrX	5292795	5293725	931	+	26	44	7	1	0.1926	0.1956	0.0504	0.006	0.1659
Plc21C	5_Junction_10593_Junction_10595	5_Junction_10593_Junction_10595	J001	0.0168277	24.8187	6.29844e-07	2.09668e-05	5.81956	8.56731	1.3579	chr2L	343729	344022	294	+	15	11	32	46	0.25	0.2157	0.5818	0.6479	-0.382
Plc21C	5_Junction_10593_Junction_10595	5_Junction_10593_Junction_10595	J002	0.0163604	25.0412	5.61178e-07	1.89652e-05	9.39058	7.05723	-1.05631	chr2L	343729	344040	312	+	45	40	23	25	0.75	0.7843	0.4182	0.3521	0.382
l(1)G0255	5_Junction_106973_Junction_106974	5_Junction_106973_Junction_106974	J001	0.0353759	15.043	0.00010509	0.00171027	6.44106	3.48067	-1.95975	chrX	6572649	6572788	140	+	15	21	5	4	0.1531	0.236	0.0413	0.0396	0.1541
l(1)G0255	5_Junction_106973_Junction_106974	5_Junction_106973_Junction_106974	J002	0.0298247	16.0349	6.21858e-05	0.001105	11.0919	12.5307	0.546688	chrX	6572649	6573857	1209	+	83	68	116	97	0.8469	0.764	0.9587	0.9604	-0.1541
CG43736	5_Junction_107485_Junction_107486	5_Junction_107485_Junction_107486	J001	0.265193	4.81762	0.0281702	0.133647	5.03043	7.70541	1.44091	chrX	6766954	6770373	3420	+	14	19	10	23	0.209	0.5	0.625	0.8846	-0.4003
CG43736	5_Junction_107485_Junction_107486	5_Junction_107485_Junction_107486	J002	0.26292	4.85102	0.0276298	0.132135	6.93106	4.35737	-1.5201	chrX	6766954	6771945	4992	+	53	19	6	3	0.791	0.5	0.375	0.1154	0.4003
Dsor1	5_Junction_111085_Junction_111086	5_Junction_111085_Junction_111086	J001	0.0119952	4.55021	0.0329147	0.148972	8.49076	9.45075	0.412257	chrX	9141941	9142573	633	+	29	19	71	67	0.4603	0.4872	0.6017	0.6442	-0.1492
Dsor1	5_Junction_111085_Junction_111086	5_Junction_111085_Junction_111086	J002	0.0122488	4.52171	0.0334673	0.150591	8.87579	7.81673	-0.473435	chrX	9141941	9142582	642	+	34	20	47	37	0.5397	0.5128	0.3983	0.3558	0.1492
pog	5_Junction_11599_Junction_11600	5_Junction_11599_Junction_11600	J001	0.0179603	5.90346	0.0151112	0.0861856	9.92777	9.1764	-0.312365	chr2L	4853016	4854396	1381	+	61	30	46	57	0.8971	0.9375	0.7797	0.7808	0.13705
pog	5_Junction_11599_Junction_11600	5_Junction_11599_Junction_11600	J002	0.0226046	5.62066	0.01775	0.0968281	3.74499	5.46063	1.1875	chr2L	4853016	4854433	1418	+	7	2	13	16	0.1029	0.0625	0.2203	0.2192	-0.13705
pog	5_Junction_11627_Junction_11629	5_Junction_11627_Junction_11629	J001	0.0544943	12.2757	0.000458887	0.00568714	8.86908	11.374	1.01619	chr2L	4872693	4873816	1124	+	27	35	87	114	0.1731	0.2917	0.4754	0.5729	-0.29175
pog	5_Junction_11627_Junction_11629	5_Junction_11627_Junction_11629	J002	0.0540884	12.3489	0.000441245	0.0055061	13.3651	10.9667	-0.902903	chr2L	4872693	4873870	1178	+	129	85	96	85	0.8269	0.7083	0.5246	0.4271	0.29175
Msp300	5_Junction_12041_Junction_12042	5_Junction_12041_Junction_12042	J001	0.0259873	5.44356	0.0196405	0.103912	12.4323	13.7942	0.500006	chr2L	5203742	5204449	708	+	165	240	133	22	0.3327	0.4117	0.5612	0.4681	-0.14245
Msp300	5_Junction_12041_Junction_12042	5_Junction_12041_Junction_12042	J002	0.0258941	5.45953	0.0194619	0.103195	14.4061	13.078	-0.481215	chr2L	5203742	5204461	720	+	331	343	104	25	0.6673	0.5883	0.4388	0.5319	0.14245
Msp300	5_Junction_12043_Junction_12044	5_Junction_12043_Junction_12044	J001	0.00719111	21.7502	3.10565e-06	8.44081e-05	13.5686	14.768	0.431155	chr2L	5204592	5204834	243	+	152	122	237	156	0.6847	0.6932	0.8464	0.8619	-0.1652
Msp300	5_Junction_12043_Junction_12044	5_Junction_12043_Junction_12044	J002	0.00750493	21.4293	3.67117e-06	9.80004e-05	10.543	8.27326	-0.953617	chr2L	5204592	5204873	282	+	70	54	43	25	0.3153	0.3068	0.1536	0.1381	0.1652
stai	5_Junction_12755_Junction_12756	5_Junction_12755_Junction_12756	J001	0.0323713	18.8741	1.39635e-05	0.000310797	18.2131	20.7288	0.857075	chr2L	6122410	6122696	287	+	227	291	839	1770	0.418	0.4755	0.6723	0.7623	-0.27055
stai	5_Junction_12755_Junction_12756	5_Junction_12755_Junction_12756	J002	0.0324164	18.8496	1.41444e-05	0.000314171	19.0527	16.4987	-0.879659	chr2L	6122410	6122976	567	+	316	321	409	552	0.582	0.5245	0.3277	0.2377	0.27055
Bsg	5_Junction_14242_Junction_14244	5_Junction_14242_Junction_14244	J001	0.0102032	22.623	1.97113e-06	5.69111e-05	8.75851	5.83512	-1.43269	chr2L	8089736	8102298	12563	+	40	30	20	11	0.1613	0.1554	0.0505	0.0529	0.10665
Bsg	5_Junction_14242_Junction_14244	5_Junction_14242_Junction_14244	J002	0.00922651	23.3392	1.35807e-06	4.14787e-05	15.0227	16.0558	0.363724	chr2L	8089736	8105690	15955	+	208	163	376	197	0.8387	0.8446	0.9495	0.9471	-0.10665
Bsg	5_Junction_14260_Junction_14261	5_Junction_14260_Junction_14261	J001	0.153869	7.31117	0.00685274	0.047964	14.7974	17.9401	1.09683	chr2L	8107880	8109814	1935	+	200	191	515	290	0.554	0.5634	0.9229	0.7652	-0.28535
Bsg	5_Junction_14260_Junction_14261	5_Junction_14260_Junction_14261	J002	0.154562	7.27992	0.00697296	0.04861	13.8445	10.791	-1.14587	chr2L	8107880	8110479	2600	+	161	148	43	89	0.446	0.4366	0.0771	0.2348	0.28535
Sema-1a	5_Junction_14909_Junction_14911	5_Junction_14909_Junction_14911	J001	0.0104193	8.08233	0.00446989	0.034723	12.2939	11.467	-0.313371	chr2L	8663251	8664156	906	+	152	119	47	76	0.8539	0.8623	0.7231	0.7379	0.1276
Sema-1a	5_Junction_14909_Junction_14911	5_Junction_14909_Junction_14911	J002	0.0114766	7.87098	0.00502344	0.0378279	6.30112	7.96742	0.82281	chr2L	8663251	8666034	2784	+	26	19	18	27	0.1461	0.1377	0.2769	0.2621	-0.1276
Gpb5	5_Junction_16016_Junction_16017	5_Junction_16016_Junction_16017	J001	0.00931703	22.6914	1.90215e-06	5.52163e-05	15.6909	16.9866	0.451955	chr2LHet	167315	167374	60	+	88	45	1090	1258	0.8224	0.8182	0.9413	0.9494	-0.12505
Gpb5	5_Junction_16016_Junction_16017	5_Junction_16016_Junction_16017	J002	0.0100626	22.3057	2.3252e-06	6.56622e-05	9.82649	6.57512	-1.48161	chr2LHet	167315	167382	68	+	19	10	68	67	0.1776	0.1818	0.0587	0.0506	0.12505
cg	5_Junction_16186_Junction_16187	5_Junction_16186_Junction_16187	J001	0.0108457	14.3836	0.000149095	0.00227849	12.7901	14.148	0.494701	chr2R	10066546	10066612	67	+	194	170	134	74	0.5092	0.5363	0.6768	0.7551	-0.1932
cg	5_Junction_16186_Junction_16187	5_Junction_16186_Junction_16187	J002	0.0109279	14.3318	0.000153256	0.00232881	12.4457	10.8272	-0.618434	chr2R	10066546	10066615	70	+	187	147	64	24	0.4908	0.4637	0.3232	0.2449	0.1932
Asx	5_Junction_16512_Junction_16513	5_Junction_16512_Junction_16513	J001	0.150548	5.58964	0.018067	0.0979686	4.81583	2.71482	-1.7539	chr2R	10394854	10394919	66	+	14	19	1	2	0.2692	0.5429	0.0714	0.1	0.32035
Asx	5_Junction_16512_Junction_16513	5_Junction_16512_Junction_16513	J002	0.14179	5.76083	0.0163873	0.0913837	5.91002	7.78615	0.953571	chr2R	10394854	10395043	190	+	38	16	13	18	0.7308	0.4571	0.9286	0.9	-0.32035
CG43729	5_Junction_17354_Junction_17357_Junction_17359	5_Junction_17354_Junction_17357_Junction_17359	J001	0.0805212	0.518632	0.471426	0.784242	6.77428	5.77829	-0.536278	chr2R	11344320	11345251	932	+	23	12	13	19	0.2527	0.1644	0.1074	0.2184	0.04565
CG43729	5_Junction_17354_Junction_17357_Junction_17359	5_Junction_17354_Junction_17357_Junction_17359	J002	0.0302495	22.055	2.6495e-06	7.34675e-05	9.20407	5.60188	-1.75813	chr2R	11344320	11346402	2083	+	37	38	20	10	0.4066	0.5205	0.1653	0.1149	0.32345
CG43729	5_Junction_17354_Junction_17357_Junction_17359	5_Junction_17354_Junction_17357_Junction_17359	J003	0.013209	32.612	1.12516e-08	6.06753e-07	8.10557	10.485	1.00627	chr2R	11344320	11348376	4057	+	31	23	88	58	0.3407	0.3151	0.7273	0.6667	-0.3691
CG43729	5_Junction_17380_Junction_17381	5_Junction_17380_Junction_17381	J001	0.071707	4.79397	0.0285596	0.13492	8.192	6.56554	-0.785372	chr2R	11352191	11352834	644	+	41	23	25	13	0.5541	0.3651	0.2841	0.1912	0.22195
CG43729	5_Junction_17380_Junction_17381	5_Junction_17380_Junction_17381	J002	0.0698155	4.88386	0.0271089	0.130284	8.68498	10.204	0.63579	chr2R	11352191	11352861	671	+	33	40	63	55	0.4459	0.6349	0.7159	0.8088	-0.22195
gprs	5_Junction_18532_Junction_18533	5_Junction_18532_Junction_18533	J001	0.0876122	7.12732	0.00759182	0.0518743	5.56242	7.58097	1.05703	chr2R	12529197	12529555	359	+	15	14	19	27	0.3061	0.56	0.7308	0.7941	-0.3294
gprs	5_Junction_18532_Junction_18533	5_Junction_18532_Junction_18533	J002	0.0893108	7.04173	0.00796322	0.0537563	6.65372	4.52055	-1.26385	chr2R	12529197	12530446	1250	+	34	11	7	7	0.6939	0.44	0.2692	0.2059	0.3294
Rgk2	5_Junction_20278_Junction_20279	5_Junction_20278_Junction_20279	J001	0.0340808	6.57918	0.0103178	0.0650751	8.52209	7.51588	-0.460456	chr2R	14427798	14431414	3617	+	34	16	28	46	0.9444	0.8889	0.6829	0.7797	0.18535
Rgk2	5_Junction_20278_Junction_20279	5_Junction_20278_Junction_20279	J002	0.0438343	6.14936	0.0131459	0.0776794	2.78487	4.77913	1.65365	chr2R	14427798	14431417	3620	+	2	2	13	13	0.0556	0.1111	0.3171	0.2203	-0.18535
ena	5_Junction_20729_Junction_20730	5_Junction_20729_Junction_20730	J001	0.0136153	16.2436	5.56968e-05	0.0010089	9.97862	11.9782	0.782004	chr2R	15048920	15048976	57	+	73	46	131	43	0.2303	0.2244	0.4549	0.3675	-0.18385
ena	5_Junction_20729_Junction_20730	5_Junction_20729_Junction_20730	J002	0.0133225	16.4608	4.96675e-05	0.000917226	14.6405	13.0827	-0.563219	chr2R	15048920	15048979	60	+	244	159	157	74	0.7697	0.7756	0.5451	0.6325	0.18385
cora	5_Junction_20813_Junction_20814	5_Junction_20813_Junction_20814	J001	0.132048	20.5691	5.7516e-06	0.000145402	3.8146	7.50531	2.21244	chr2R	15124568	15125245	678	+	2	9	28	23	0.0714	0.2308	0.875	0.7188	-0.6458
cora	5_Junction_20813_Junction_20814	5_Junction_20813_Junction_20814	J002	0.128891	20.8739	4.9053e-06	0.000126489	7.74993	4.13707	-2.07738	chr2R	15124568	15125655	1088	+	26	30	4	9	0.9286	0.7692	0.125	0.2812	0.6458
cora	5_Junction_20825_Junction_20827	5_Junction_20825_Junction_20827	J001	0.0206037	31.09	2.46337e-08	1.21741e-06	8.21818	4.06612	-2.34565	chr2R	15129900	15129987	88	+	50	33	7	3	0.2577	0.2115	0.031	0.0612	0.1885
cora	5_Junction_20825_Junction_20827	5_Junction_20825_Junction_20827	J002	0.0184906	32.5006	1.19156e-08	6.37482e-07	12.3997	14.2423	0.673623	chr2R	15129900	15130207	308	+	144	123	219	46	0.7423	0.7885	0.969	0.9388	-0.1885
par-1	5_Junction_21125_Junction_21126_Junction_21131	5_Junction_21125_Junction_21126_Junction_21131	J001	0.0205005	4.02866	0.0447335	0.18389	8.59292	7.43951	-0.528092	chr2R	15361472	15362031	560	+	71	48	19	12	0.6636	0.5783	0.4318	0.48	0.16505
par-1	5_Junction_21125_Junction_21126_Junction_21131	5_Junction_21125_Junction_21126_Junction_21131	J002	0.0420716	0.138379	0.709898	0.929437	4.27486	3.85898	-0.316682	chr2R	15361472	15362034	563	+	10	13	4	3	0.0935	0.1566	0.0909	0.12	0.0196
par-1	5_Junction_21125_Junction_21126_Junction_21131	5_Junction_21125_Junction_21126_Junction_21131	J003	0.0156	6.34308	0.011784	0.0718665	5.93681	7.43815	0.77429	chr2R	15361472	15366255	4784	+	26	22	21	10	0.243	0.2651	0.4773	0.4	-0.1846
maf-S	5_Junction_21841_Junction_21842_Junction_21843	5_Junction_21841_Junction_21842_Junction_21843	J001	0.0867756	19.6578	9.26268e-06	0.000219355	3.26916	8.5914	3.17815	chr2R	16528623	16528669	47	+	2	5	52	31	0.0095	0.0123	0.163	0.0814	-0.1113
maf-S	5_Junction_21841_Junction_21842_Junction_21843	5_Junction_21841_Junction_21842_Junction_21843	J002	0.029357	5.47673	0.0192713	0.102489	6.06039	7.88764	0.916934	chr2R	16528623	16528672	50	+	10	17	23	43	0.0474	0.0419	0.0721	0.1129	-0.04785
maf-S	5_Junction_21841_Junction_21842_Junction_21843	5_Junction_21841_Junction_21842_Junction_21843	J003	0.0121606	39.5215	3.24469e-10	2.51206e-08	17.1483	15.7734	-0.478995	chr2R	16528623	16528684	62	+	199	384	244	307	0.9431	0.9458	0.7649	0.8058	0.1591
koi	5_Junction_26283_Junction_26284	5_Junction_26283_Junction_26284	J001	0.0194941	12.9526	0.000319473	0.00422557	11.3855	12.586	0.453701	chr2R	2701258	2701540	283	+	55	44	204	153	0.7333	0.8148	0.9107	0.9329	-0.14775
koi	5_Junction_26283_Junction_26284	5_Junction_26283_Junction_26284	J002	0.0230543	12.2076	0.000475963	0.00584755	7.31743	4.89515	-1.34332	chr2R	2701258	2702563	1306	+	20	10	20	11	0.2667	0.1852	0.0893	0.0671	0.14775
Ggamma1	5_Junction_29005_Junction_29007	5_Junction_29005_Junction_29007	J001	0.0622851	14.7951	0.000119845	0.00190422	15.1033	18.0707	1.03316	chr2R	4789027	4789640	614	+	155	183	427	589	0.1834	0.2618	0.4636	0.6085	-0.31345
Ggamma1	5_Junction_29005_Junction_29007	5_Junction_29005_Junction_29007	J002	0.0622151	14.8111	0.000118835	0.00189097	20.3541	17.4018	-1.00932	chr2R	4789027	4789831	805	+	690	516	494	379	0.8166	0.7382	0.5364	0.3915	0.31345
aret	5_Junction_3061_Junction_3062	5_Junction_3061_Junction_3062	J001	0.0407776	39.7348	2.90899e-10	2.27403e-08	6.40656	9.78095	1.55138	chr2L	12299394	12300359	966	+	24	12	63	39	0.4286	0.2857	0.9265	0.8864	-0.5493
aret	5_Junction_3061_Junction_3062	5_Junction_3061_Junction_3062	J002	0.0430713	38.7614	4.78911e-10	3.53363e-08	8.03772	3.65432	-2.59201	chr2L	12299394	12304444	5051	+	32	30	5	5	0.5714	0.7143	0.0735	0.1136	0.5493
qvr	5_Junction_32230_Junction_32231	5_Junction_32230_Junction_32231	J001	0.152711	5.73772	0.0166044	0.0921472	6.81581	9.3694	1.16846	chr2R	7332265	7332871	607	+	17	18	34	71	0.096	0.0963	0.1932	0.461	-0.23095
qvr	5_Junction_32230_Junction_32231	5_Junction_32230_Junction_32231	J002	0.149956	5.83208	0.0157365	0.0887843	14.8039	12.0921	-0.989581	chr2R	7332265	7333636	1372	+	160	169	142	83	0.904	0.9037	0.8068	0.539	0.23095
Dyb	5_Junction_33077_Junction_33079	5_Junction_33077_Junction_33079	J001	0.0164872	45.0142	1.9561e-11	2.06219e-09	8.60714	4.18697	-2.42778	chr2R	8337287	8337572	286	+	25	33	9	8	0.3165	0.3667	0.0616	0.0473	0.28715
Dyb	5_Junction_33077_Junction_33079	5_Junction_33077_Junction_33079	J002	0.0146294	46.7788	7.94674e-12	8.87143e-10	10.8687	12.9069	0.773194	chr2R	8337287	8339172	1886	+	54	57	137	161	0.6835	0.6333	0.9384	0.9527	-0.28715
Amph	5_Junction_33358_Junction_33360	5_Junction_33358_Junction_33360	J001	0.0739848	28.4919	9.40933e-08	4.00061e-06	6.89623	1.95936	-3.90485	chr2R	8495683	8496672	990	+	25	33	1	1	0.1712	0.2845	0.0067	0.0122	0.2184
Amph	5_Junction_33358_Junction_33360	5_Junction_33358_Junction_33360	J002	0.0669326	29.9394	4.45758e-08	2.04801e-06	11.0048	14.0679	1.1427	chr2R	8495683	8496732	1050	+	121	83	149	81	0.8288	0.7155	0.9933	0.9878	-0.2184
sca	5_Junction_33553_Junction_33554	5_Junction_33553_Junction_33554	J001	0.0809335	3.88579	0.0486964	0.194828	8.33255	9.93583	0.682782	chr2R	8662615	8670508	7894	+	36	30	64	46	0.2769	0.1948	0.5246	0.3309	-0.1919
sca	5_Junction_33553_Junction_33554	5_Junction_33553_Junction_33554	J002	0.0798159	3.93072	0.0474115	0.191356	12.6825	11.1196	-0.592307	chr2R	8662615	8670512	7898	+	94	124	58	93	0.7231	0.8052	0.4754	0.6691	0.1919
Aplip1	5_Junction_36945_Junction_36946	5_Junction_36945_Junction_36946	J001	0.0183207	10.5171	0.00118274	0.0120833	14.3494	15.4532	0.392084	chr3L	1197313	1197507	195	+	192	125	225	264	0.824	0.7911	0.8929	0.9296	-0.1037
Aplip1	5_Junction_36945_Junction_36946	5_Junction_36945_Junction_36946	J002	0.0196978	10.1532	0.00144054	0.0141882	8.93312	6.97536	-0.902847	chr3L	1197313	1197528	216	+	41	33	27	20	0.176	0.2089	0.1071	0.0704	0.1037
Ptp69D	5_Junction_37488_Junction_37489	5_Junction_37488_Junction_37489	J001	0.0299554	6.50867	0.010735	0.0670639	5.51899	6.97674	0.789117	chr3L	12731803	12731870	68	+	8	8	30	37	0.3636	0.4211	0.6122	0.7255	-0.2765
Ptp69D	5_Junction_37488_Junction_37489	5_Junction_37488_Junction_37489	J002	0.0314564	6.41188	0.0113359	0.0697748	6.68418	5.12963	-0.877923	chr3L	12731803	12731873	71	+	14	11	19	14	0.6364	0.5789	0.3878	0.2745	0.2765
Ent3	5_Junction_37679_Junction_37680	5_Junction_37679_Junction_37680	J001	0.0105045	4.49031	0.0340875	0.152364	10.8969	11.7223	0.318562	chr3L	12848113	12848286	174	+	64	65	113	78	0.5517	0.5	0.6608	0.619	-0.11405
Ent3	5_Junction_37679_Junction_37680	5_Junction_37679_Junction_37680	J002	0.0106602	4.46213	0.0346542	0.154009	10.5501	9.58347	-0.392024	chr3L	12848113	12848289	177	+	52	65	58	48	0.4483	0.5	0.3392	0.381	0.11405
fz	5_Junction_38754_Junction_38757_Junction_38760_Junction_38762_Junction_38773	5_Junction_38754_Junction_38757_Junction_38760_Junction_38762_Junction_38773	J001	0.0326063	0.02047	0.886232	0.987039	7.76322	7.91576	0.070696	chr3L	14284264	14284324	61	+	35	25	21	34	0.2047	0.2083	0.1511	0.25	0.00595
fz	5_Junction_38754_Junction_38757_Junction_38760_Junction_38762_Junction_38773	5_Junction_38754_Junction_38757_Junction_38760_Junction_38762_Junction_38773	J002	0.185306	10.723	0.0010581	0.0110763	8.43254	3.76075	-2.68189	chr3L	14284264	14289172	4909	+	41	33	1	9	0.2398	0.275	0.0072	0.0662	0.2207
fz	5_Junction_38754_Junction_38757_Junction_38760_Junction_38762_Junction_38773	5_Junction_38754_Junction_38757_Junction_38760_Junction_38762_Junction_38773	J003	0.0971358	11.2391	0.000800941	0.00887721	6.0467	10.3134	1.96201	chr3L	14284264	14295135	10872	+	20	13	73	40	0.117	0.1083	0.5252	0.2941	-0.297
fz	5_Junction_38754_Junction_38757_Junction_38760_Junction_38762_Junction_38773	5_Junction_38754_Junction_38757_Junction_38760_Junction_38762_Junction_38773	J004	0.0149126	0.0132305	0.908426	0.991533	6.84968	7.16066	0.15488	chr3L	14284264	14301972	17709	+	24	20	19	24	0.1404	0.1667	0.1367	0.1765	-0.00305
fz	5_Junction_38754_Junction_38757_Junction_38760_Junction_38762_Junction_38773	5_Junction_38754_Junction_38757_Junction_38760_Junction_38762_Junction_38773	J005	0.0141572	2.66182	0.102783	0.322896	8.67724	7.84987	-0.371849	chr3L	14284264	14355515	71252	+	51	29	25	29	0.2982	0.2417	0.1799	0.2132	0.0734
Mbs	5_Junction_39886_Junction_39889	5_Junction_39886_Junction_39889	J001	0.0398461	4.22017	0.0399461	0.170268	6.88854	8.24951	0.64593	chr3L	16057417	16058146	730	+	22	15	33	41	0.22	0.1765	0.2821	0.4141	-0.14985
Mbs	5_Junction_39886_Junction_39889	5_Junction_39886_Junction_39889	J002	0.0381578	4.32882	0.0374721	0.162865	11.5615	10.4627	-0.428685	chr3L	16057417	16059121	1705	+	78	70	84	58	0.78	0.8235	0.7179	0.5859	0.14985
Exn	5_Junction_40770_Junction_40773	5_Junction_40770_Junction_40773	J001	0.0496965	9.27189	0.00232698	0.0208267	3.03859	5.67226	1.94542	chr3L	16838233	16971277	133045	+	12	14	3	4	0.24	0.1538	0.6	0.8	-0.5031
Exn	5_Junction_40770_Junction_40773	5_Junction_40770_Junction_40773	J002	0.0405712	9.60711	0.00193826	0.0179488	6.07003	3.85482	-1.44784	chr3L	16838233	17033914	195682	+	38	77	2	1	0.76	0.8462	0.4	0.2	0.5031
Nc73EF	5_Junction_40823_Junction_40824	5_Junction_40823_Junction_40824	J001	0.0296571	6.00833	0.0142385	0.0823966	5.79296	3.93584	-1.22859	chr3L	16952984	16953636	653	+	16	25	3	5	0.2162	0.2976	0.0857	0.1136	0.15725
Nc73EF	5_Junction_40823_Junction_40824	5_Junction_40823_Junction_40824	J002	0.0255906	6.27773	0.0122265	0.0738468	8.87276	9.86406	0.416244	chr3L	16952984	16954598	1615	+	58	59	32	39	0.7838	0.7024	0.9143	0.8864	-0.15725
CG5872	5_Junction_43608_Junction_43609_Junction_43610	5_Junction_43608_Junction_43609_Junction_43610	J001	0.0112903	5.75421	0.0164492	0.0915466	8.34029	6.98068	-0.640416	chr3L	20430212	20430345	134	+	43	28	19	22	0.2986	0.2857	0.1979	0.1642	0.1111
CG5872	5_Junction_43608_Junction_43609_Junction_43610	5_Junction_43608_Junction_43609_Junction_43610	J002	0.0105032	9.45574	0.0021049	0.0191965	10.4655	11.6965	0.47913	chr3L	20430212	20430352	141	+	80	52	66	99	0.5556	0.5306	0.6875	0.7388	-0.17005
CG5872	5_Junction_43608_Junction_43609_Junction_43610	5_Junction_43608_Junction_43609_Junction_43610	J003	0.0167736	2.31992	0.127727	0.371205	6.54981	5.55035	-0.552815	chr3L	20430212	20430357	146	+	21	18	11	13	0.1458	0.1837	0.1146	0.097	0.05895
nrm	5_Junction_45748_Junction_45751	5_Junction_45748_Junction_45751	J001	0.0923476	6.44414	0.0111319	0.0688278	4.57859	6.37765	1.07922	chr3L	23025301	23026592	1292	+	15	10	10	13	0.3488	0.4545	0.625	0.9286	-0.37515
nrm	5_Junction_45748_Junction_45751	5_Junction_45748_Junction_45751	J002	0.0923968	6.4426	0.0111416	0.0688701	5.62771	3.71635	-1.30952	chr3L	23025301	23031110	5810	+	28	12	6	1	0.6512	0.5455	0.375	0.0714	0.37515
CG17698	5_Junction_46121_Junction_46124	5_Junction_46121_Junction_46124	J001	0.0356908	23.065	1.56619e-06	4.69011e-05	12.8757	10.3319	-0.974373	chr3L	23731284	23733259	1976	+	70	56	62	162	0.9091	0.8615	0.5	0.6113	0.32965
CG17698	5_Junction_46121_Junction_46124	5_Junction_46121_Junction_46124	J002	0.0365098	22.7864	1.81043e-06	5.29116e-05	6.00005	9.2418	1.54721	chr3L	23731284	23739288	8005	+	7	9	62	103	0.0909	0.1385	0.5	0.3887	-0.32965
Shab	5_Junction_46969_Junction_46971_Junction_46972	5_Junction_46969_Junction_46971_Junction_46972	J001	0.0158038	49.2802	2.21896e-12	2.67663e-10	9.10085	4.1205	-2.69084	chr3L	2941624	2944021	2398	+	56	37	9	3	0.2902	0.3083	0.0566	0.0226	0.25965
Shab	5_Junction_46969_Junction_46971_Junction_46972	5_Junction_46969_Junction_46971_Junction_46972	J002	0.0188335	4.9896	0.0255001	0.124711	9.21923	10.9392	0.697886	chr3L	2941624	2947800	6177	+	53	43	67	63	0.2746	0.3583	0.4214	0.4737	-0.1311
Shab	5_Junction_46969_Junction_46971_Junction_46972	5_Junction_46969_Junction_46971_Junction_46972	J003	0.0187574	3.90168	0.0482379	0.193523	10.0757	11.4675	0.54815	chr3L	2941624	2947875	6252	+	84	40	83	67	0.4352	0.3333	0.522	0.5038	-0.12865
sif	5_Junction_49212_Junction_49213	5_Junction_49212_Junction_49213	J001	0.0163138	21.1599	4.22523e-06	0.000110951	10.4375	12.3105	0.722121	chr3L	5724736	5727537	2802	+	109	72	77	64	0.5343	0.5538	0.77	0.8649	-0.2734
sif	5_Junction_49212_Junction_49213	5_Junction_49212_Junction_49213	J002	0.0168249	20.8843	4.87874e-06	0.000125905	9.83311	7.27982	-1.13051	chr3L	5724736	5727564	2829	+	95	58	23	10	0.4657	0.4462	0.23	0.1351	0.2734
sif	5_Junction_49233_Junction_49234	5_Junction_49233_Junction_49234	J001	0.0467595	14.9832	0.000108471	0.00175378	16.0288	13.6796	-0.835573	chr3L	5732434	5732542	109	+	434	255	163	60	0.8948	0.8279	0.6653	0.5769	0.24025
sif	5_Junction_49233_Junction_49234	5_Junction_49233_Junction_49234	J002	0.0475719	14.7811	0.000120738	0.0019151	8.89116	11.484	1.04896	chr3L	5732434	5732563	130	+	51	53	82	44	0.1052	0.1721	0.3347	0.4231	-0.24025
tow	5_Junction_50602_Junction_50603	5_Junction_50602_Junction_50603	J001	0.0218958	29.1436	6.72087e-08	2.9713e-06	12.5062	11.1159	-0.528246	chr3L	6939547	6939599	53	+	112	80	117	52	0.9912	0.9756	0.8239	0.7761	0.1834
tow	5_Junction_50602_Junction_50603	5_Junction_50602_Junction_50603	J002	0.0281949	27.3075	1.73537e-07	6.83264e-06	2.15042	6.42781	3.3899	chr3L	6939547	6939614	68	+	1	2	25	15	0.0088	0.0244	0.1761	0.2239	-0.1834
tow	5_Junction_50605_Junction_50606	5_Junction_50605_Junction_50606	J001	0.0274319	9.62824	0.00191608	0.0178021	10.5266	12.1309	0.619262	chr3L	6941015	6941069	55	+	89	54	119	57	0.2306	0.1869	0.3371	0.4419	-0.18075
tow	5_Junction_50605_Junction_50606	5_Junction_50605_Junction_50606	J002	0.0270628	9.71863	0.00182409	0.0170954	15.6793	14.2879	-0.493658	chr3L	6941015	6941084	70	+	297	235	234	72	0.7694	0.8131	0.6629	0.5581	0.18075
lqf	5_Junction_51114_Junction_51115	5_Junction_51114_Junction_51115	J001	0.0566237	14.3655	0.000150533	0.00229665	8.96846	11.3226	0.9536	chr3L	7528744	7529809	1066	+	73	39	57	59	0.6518	0.4815	0.8636	0.8939	-0.3121
lqf	5_Junction_51114_Junction_51115	5_Junction_51114_Junction_51115	J002	0.0585211	14.0855	0.000174683	0.00259085	7.97574	5.18798	-1.46712	chr3L	7528744	7530074	1331	+	39	42	9	7	0.3482	0.5185	0.1364	0.1061	0.3121
beat-Ia	5_Junction_5139_Junction_5140	5_Junction_5139_Junction_5140	J001	0.0311391	11.5315	0.000684269	0.00781637	6.67957	8.96287	1.06553	chr2L	16080196	16080444	249	+	11	16	54	62	0.0759	0.0829	0.1748	0.2531	-0.13455
beat-Ia	5_Junction_5139_Junction_5140	5_Junction_5139_Junction_5140	J002	0.0299435	11.7965	0.000593416	0.00696761	15.4599	13.8847	-0.561574	chr2L	16080196	16080474	279	+	134	177	255	183	0.9241	0.9171	0.8252	0.7469	0.13455
Ca-alpha1D	5_Junction_5175_Junction_5176	5_Junction_5175_Junction_5176	J001	0.0544463	22.3323	2.29322e-06	6.493e-05	6.12764	3.21149	-2.03509	chr2L	16168612	16169485	874	+	12	15	2	7	0.8	0.8824	0.1176	0.2692	0.6478
Ca-alpha1D	5_Junction_5175_Junction_5176	5_Junction_5175_Junction_5176	J002	0.0545785	22.3163	2.3123e-06	6.53266e-05	2.80311	5.91219	2.32375	chr2L	16168612	16169516	905	+	3	2	15	19	0.2	0.1176	0.8824	0.7308	-0.6478
Dscam4	5_Junction_51846_Junction_51848	5_Junction_51846_Junction_51848	J001	0.0355641	5.03883	0.0247852	0.122395	12.0368	13.3429	0.484341	chr3L	8273066	8273358	293	+	138	126	127	66	0.5798	0.6	0.8038	0.6735	-0.14875
Dscam4	5_Junction_51846_Junction_51848	5_Junction_51846_Junction_51848	J002	0.0360452	4.98871	0.0255132	0.124743	10.6764	9.21531	-0.596251	chr3L	8273066	8273427	362	+	100	84	31	32	0.4202	0.4	0.1962	0.3265	0.14875
Ca-alpha1D	5_Junction_5231_Junction_5232	5_Junction_5231_Junction_5232	J001	0.153244	8.94899	0.00277623	0.0239491	8.7586	5.64271	-1.54323	chr2L	16185626	16186109	484	+	42	20	19	14	0.6667	0.4545	0.25	0.1029	0.38415
Ca-alpha1D	5_Junction_5231_Junction_5232	5_Junction_5231_Junction_5232	J002	0.149938	9.11487	0.0025354	0.0223139	7.81142	10.9885	1.33979	chr2L	16185626	16187453	1828	+	21	24	57	122	0.3333	0.5455	0.75	0.8971	-0.38415
CG44838	5_Junction_53515_Junction_53516	5_Junction_53515_Junction_53516	J001	0.0867506	11.7295	0.000615155	0.00718279	11.5496	14.2894	1.01184	chr3L	9463733	9464233	501	+	74	71	205	184	0.5324	0.6455	0.83	0.9154	-0.28375
CG44838	5_Junction_53515_Junction_53516	5_Junction_53515_Junction_53516	J002	0.0887341	11.5131	0.000691087	0.00788446	10.2723	7.46475	-1.21959	chr3L	9463733	9466226	2494	+	65	39	42	17	0.4676	0.3545	0.17	0.0846	0.28375
Glut1	5_Junction_53965_Junction_53969	5_Junction_53965_Junction_53969	J001	0.0311003	23.1961	1.46292e-06	4.42199e-05	8.2167	4.5203	-2.01485	chr3L	984276	984645	370	+	111	64	5	1	0.6167	0.5203	0.1316	0.0909	0.45725
Glut1	5_Junction_53965_Junction_53969	5_Junction_53965_Junction_53969	J002	0.0312176	23.1642	1.48739e-06	4.48385e-05	7.28338	10.1467	1.25635	chr3L	984276	985939	1664	+	69	59	33	10	0.3833	0.4797	0.8684	0.9091	-0.45725
CG14853	5_Junction_55139_Junction_55140	5_Junction_55139_Junction_55140	J001	0.0570408	4.33151	0.0374129	0.162689	8.94878	7.79186	-0.516426	chr3R	10435589	10435688	100	+	25	25	40	51	0.8333	0.9615	0.7843	0.6711	0.1697
CG14853	5_Junction_55139_Junction_55140	5_Junction_55139_Junction_55140	J002	0.0685238	4.01663	0.0450537	0.184852	3.56031	5.26791	1.22536	chr3R	10435589	10435755	167	+	5	1	11	25	0.1667	0.0385	0.2157	0.3289	-0.1697
Tm1	5_Junction_55912_Junction_55915_Junction_55916	5_Junction_55912_Junction_55915_Junction_55916	J001	0.0209387	9.82996	0.00171692	0.0163141	7.92322	5.28963	-1.38033	chr3R	11128944	11129361	418	+	21	22	13	18	0.1257	0.1215	0.037	0.0641	0.07305
Tm1	5_Junction_55912_Junction_55915_Junction_55916	5_Junction_55912_Junction_55915_Junction_55916	J002	0.0165522	35.6377	2.37648e-09	1.50224e-07	3.7865	8.76116	2.80531	chr3R	11128944	11133310	4367	+	5	3	63	42	0.0299	0.0166	0.1795	0.1495	-0.14125
Tm1	5_Junction_55912_Junction_55915_Junction_55916	5_Junction_55912_Junction_55915_Junction_55916	J003	0.00701415	4.79843	0.0284856	0.134671	15.0609	14.5659	-0.176032	chr3R	11128944	11133751	4808	+	141	156	275	221	0.8443	0.8619	0.7835	0.7865	0.0681
NPF	5_Junction_57007_Junction_57008	5_Junction_57007_Junction_57008	J001	0.0318329	5.82153	0.0158312	0.0891701	25.7389	27.411	0.559349	chr3R	12435550	12436485	936	+	7437	920	2165	2646	0.5683	0.675	0.7716	0.735	-0.13165
NPF	5_Junction_57007_Junction_57008	5_Junction_57007_Junction_57008	J002	0.0318407	5.82013	0.0158438	0.0892128	24.3533	22.6707	-0.565392	chr3R	12435550	12436495	946	+	5649	443	641	954	0.4317	0.325	0.2284	0.265	0.13165
dgrn	5_Junction_60928_Junction_60929	5_Junction_60928_Junction_60929	J001	0.0217019	3.74379	0.0530039	0.206627	5.87628	4.60246	-0.788487	chr3R	1650697	1650753	57	+	17	13	8	8	0.3469	0.3824	0.2353	0.1778	0.1581
dgrn	5_Junction_60928_Junction_60929	5_Junction_60928_Junction_60929	J002	0.0190843	3.86647	0.04926	0.196303	7.45789	8.26572	0.373983	chr3R	1650697	1650756	60	+	32	21	26	37	0.6531	0.6176	0.7647	0.8222	-0.1581
CG42322	5_Junction_61018_Junction_61019	5_Junction_61018_Junction_61019	J001	0.0826774	19.6506	9.29723e-06	0.00021985	11.4511	15.1938	1.37163	chr3R	16576076	16576408	333	+	189	88	115	138	0.1851	0.1241	0.4563	0.6449	-0.396
CG42322	5_Junction_61018_Junction_61019	5_Junction_61018_Junction_61019	J002	0.0822338	19.7489	8.83116e-06	0.000210141	18.1874	14.4563	-1.30341	chr3R	16576076	16578066	1991	+	832	621	137	76	0.8149	0.8759	0.5437	0.3551	0.396
Atpalpha	5_Junction_61325_Junction_61326_Junction_61327	5_Junction_61325_Junction_61326_Junction_61327	J001	0.0678611	7.51584	0.00611588	0.0439135	15.6279	18.6827	1.05784	chr3R	16792335	16792828	494	+	296	286	384	400	0.0903	0.0897	0.1592	0.2915	-0.13535
Atpalpha	5_Junction_61325_Junction_61326_Junction_61327	5_Junction_61325_Junction_61326_Junction_61327	J002	0.0098919	0.00143541	0.969778	0.99833	12.5003	12.008	-0.184594	chr3R	16792335	16794112	1778	+	139	128	86	66	0.0424	0.0402	0.0357	0.0481	-0.0006
Atpalpha	5_Junction_61325_Junction_61326_Junction_61327	5_Junction_61325_Junction_61326_Junction_61327	J003	0.0644445	5.32437	0.0210292	0.108849	25.2385	24.1397	-0.36844	chr3R	16792335	16796603	4269	+	2844	2774	1942	906	0.8673	0.8701	0.8051	0.6603	0.136
Nrx-1	5_Junction_62740_Junction_62741	5_Junction_62740_Junction_62741	J001	0.0080451	17.4557	2.94082e-05	0.000591599	11.5522	9.67252	-0.745537	chr3R	18306848	18307562	715	+	109	117	50	24	0.3682	0.4021	0.2232	0.1983	0.1744
Nrx-1	5_Junction_62740_Junction_62741	5_Junction_62740_Junction_62741	J002	0.00789013	17.5942	2.73416e-05	0.000555752	13.3539	14.608	0.452319	chr3R	18306848	18308567	1720	+	187	174	174	97	0.6318	0.5979	0.7768	0.8017	-0.1744
CG5991	5_Junction_64593_Junction_64594	5_Junction_64593_Junction_64594	J001	0.0156982	15.8076	7.01188e-05	0.00121578	7.02686	8.82106	0.828831	chr3R	19876702	19877410	709	+	15	20	39	58	0.4688	0.4348	0.75	0.7838	-0.3151
CG5991	5_Junction_64593_Junction_64594	5_Junction_64593_Junction_64594	J002	0.016705	15.5405	8.07557e-05	0.00136853	7.64769	5.3488	-1.21606	chr3R	19876702	19877420	719	+	17	26	13	16	0.5312	0.5652	0.25	0.2162	0.3151
wry	5_Junction_6628_Junction_6629	5_Junction_6628_Junction_6629	J001	0.0066563	10.885	0.000969452	0.0103405	12.2231	11.0172	-0.460845	chr2L	1854308	1855362	1055	+	91	73	82	95	0.5688	0.5935	0.4293	0.4148	0.1591
wry	5_Junction_6628_Junction_6629	5_Junction_6628_Junction_6629	J002	0.00664712	10.8904	0.000966652	0.0103192	11.0091	12.2157	0.461226	chr2L	1854308	1855371	1064	+	69	50	109	134	0.4312	0.4065	0.5707	0.5852	-0.1591
unc80	5_Junction_68136_Junction_68137	5_Junction_68136_Junction_68137	J001	0.00693475	8.95069	0.00277365	0.0239364	12.1962	11.0489	-0.438385	chr3R	23501602	23501661	60	+	102	83	116	42	0.47	0.503	0.3547	0.3415	0.1384
unc80	5_Junction_68136_Junction_68137	5_Junction_68136_Junction_68137	J002	0.00686738	8.98537	0.00272149	0.0235907	12.4307	13.4008	0.357697	chr3R	23501602	23501670	69	+	115	82	211	81	0.53	0.497	0.6453	0.6585	-0.1384
CG11876	5_Junction_69721_Junction_69722	5_Junction_69721_Junction_69722	J001	0.0222492	5.57496	0.0182191	0.0986023	13.2508	14.368	0.404243	chr3R	24939877	24940149	273	+	118	142	187	155	0.301	0.2946	0.3755	0.4799	-0.1299
CG11876	5_Junction_69721_Junction_69722	5_Junction_69721_Junction_69722	J002	0.0221449	5.59564	0.0180052	0.0977485	16.751	15.7188	-0.360443	chr3R	24939877	24940814	938	+	274	340	311	168	0.699	0.7054	0.6245	0.5201	0.1299
Vha100-1	5_Junction_69752_Junction_69753	5_Junction_69752_Junction_69753	J001	0.0727572	5.83442	0.0157156	0.0886897	14.3618	12.6068	-0.639377	chr3R	24958226	24959058	833	+	112	104	228	125	0.7568	0.8739	0.6686	0.558	0.20205
Vha100-1	5_Junction_69752_Junction_69753	5_Junction_69752_Junction_69753	J002	0.0735469	5.78515	0.0161621	0.0905111	8.89528	10.7039	0.743788	chr3R	24958226	24959581	1356	+	36	15	113	99	0.2432	0.1261	0.3314	0.442	-0.20205
CG8043	5_Junction_73169_Junction_73170	5_Junction_73169_Junction_73170	J001	0.048037	4.26842	0.038827	0.167034	6.21375	4.70076	-0.908216	chr3R	4502769	4502833	65	+	8	7	16	22	0.6154	0.6364	0.4324	0.2857	0.26685
CG8043	5_Junction_73169_Junction_73170	5_Junction_73169_Junction_73170	J002	0.0454061	4.35538	0.0368921	0.161088	4.95964	6.40133	0.838293	chr3R	4502769	4503993	1225	+	5	4	21	55	0.3846	0.3636	0.5676	0.7143	-0.26685
CG10137	5_Junction_7410_Junction_7411	5_Junction_7410_Junction_7411	J001	0.0356564	20.1602	7.1221e-06	0.0001751	3.18249	6.14789	2.07352	chr2L	19530189	19530888	700	+	6	3	13	14	0.1765	0.12	0.7222	0.6087	-0.5172
CG10137	5_Junction_7410_Junction_7411	5_Junction_7410_Junction_7411	J002	0.0312024	20.8573	4.94801e-06	0.000127438	6.91696	4.59232	-1.34825	chr2L	19530189	19530912	724	+	28	22	5	9	0.8235	0.88	0.2778	0.3913	0.5172
Glut4EF	5_Junction_74742_Junction_74758	5_Junction_74742_Junction_74758	J001	0.0171147	7.58389	0.00588921	0.0426545	7.29712	8.90591	0.732841	chr3R	5766990	5772254	5265	+	32	27	27	38	0.1584	0.1929	0.2727	0.3486	-0.135
Glut4EF	5_Junction_74742_Junction_74758	5_Junction_74742_Junction_74758	J002	0.0160461	7.81175	0.00519076	0.0387392	12.7519	11.726	-0.384886	chr3R	5766990	5853006	86017	+	170	113	72	71	0.8416	0.8071	0.7273	0.6514	0.135
CG42795	5_Junction_75116_Junction_75117	5_Junction_75116_Junction_75117	J001	0.132642	5.57363	0.018233	0.0986525	7.27845	4.9099	-1.31483	chr3R	6073996	6074064	69	+	19	37	8	8	0.1792	0.3663	0.0548	0.1159	0.1874
CG42795	5_Junction_75116_Junction_75117	5_Junction_75116_Junction_75117	J002	0.127486	5.75442	0.0164473	0.0915466	10.4731	12.8755	0.917923	chr3R	6073996	6074067	72	+	87	64	138	61	0.8208	0.6337	0.9452	0.8841	-0.1874
CG43143	5_Junction_75158_Junction_75159	5_Junction_75158_Junction_75159	J001	0.0203013	61.9952	3.44299e-15	6.64003e-13	7.49173	10.1984	1.177	chr3R	6125474	6127664	2191	+	22	15	77	84	0.4889	0.4286	0.9625	0.9655	-0.50525
CG43143	5_Junction_75158_Junction_75159	5_Junction_75158_Junction_75159	J002	0.0239042	59.2727	1.37271e-14	2.39626e-12	7.96299	2.42311	-3.79082	chr3R	6125474	6129030	3557	+	23	20	3	3	0.5111	0.5714	0.0375	0.0345	0.50525
Lar	5_Junction_7576_Junction_7578	5_Junction_7576_Junction_7578	J001	0.0686409	13.9178	0.000190985	0.00278008	6.96838	4.13362	-1.70286	chr2L	19688250	19709152	20903	+	42	29	1	7	0.5915	0.4754	0.04	0.2121	0.4074
Lar	5_Junction_7576_Junction_7578	5_Junction_7576_Junction_7578	J002	0.066097	14.1744	0.000166625	0.00249431	6.5728	9.00189	1.13749	chr2L	19688250	19726038	37789	+	29	32	24	26	0.4085	0.5246	0.96	0.7879	-0.4074
CG31388	5_Junction_75896_Junction_75897	5_Junction_75896_Junction_75897	J001	0.0353086	14.006	0.000182228	0.00267728	2.33369	5.33589	2.53161	chr3R	7064331	7064531	201	+	1	3	11	12	0.0159	0.0455	0.1774	0.2308	-0.1734
CG31388	5_Junction_75896_Junction_75897	5_Junction_75896_Junction_75897	J002	0.0249979	15.1899	9.72234e-05	0.00160045	10.4653	9.35755	-0.452594	chr3R	7064331	7064677	347	+	62	63	51	40	0.9841	0.9545	0.8226	0.7692	0.1734
NONE	5_Junction_79617_Junction_79619	5_Junction_79617_Junction_79619	J001	0.011076	9.60908	0.00193617	0.0179378	12.1613	10.769	-0.53485	chr4	1284582	1284640	59	+	37	66	139	118	0.4933	0.569	0.3861	0.3481	0.16405
NONE	5_Junction_79617_Junction_79619	5_Junction_79617_Junction_79619	J002	0.0109628	9.65561	0.00188775	0.0175795	11.5451	12.8311	0.483211	chr4	1284582	1288727	4146	+	38	50	221	221	0.5067	0.431	0.6139	0.6519	-0.16405
spir	5_Junction_7962_Junction_7963	5_Junction_7962_Junction_7963	J001	0.129714	6.40699	0.0113672	0.0699137	11.7835	9.2376	-1.01544	chr2L	20343947	20344653	707	+	181	199	22	19	0.7702	0.8924	0.44	0.6552	0.2837
spir	5_Junction_7962_Junction_7963	5_Junction_7962_Junction_7963	J002	0.133064	6.27305	0.0122588	0.0739848	6.43447	8.95274	1.18889	chr2L	20343947	20345171	1225	+	54	24	28	10	0.2298	0.1076	0.56	0.3448	-0.2837
zfh2	5_Junction_81276_Junction_81277	5_Junction_81276_Junction_81277	J001	0.0365212	40.6397	1.83049e-10	1.50779e-08	7.56559	2.4557	-3.56596	chr4	556506	557590	1085	+	16	10	4	5	0.4324	0.3704	0.0541	0.021	0.36385
zfh2	5_Junction_81276_Junction_81277	5_Junction_81276_Junction_81277	J002	0.027372	44.9187	2.05388e-11	2.1547e-09	8.78476	11.1676	0.972958	chr4	556506	557799	1294	+	21	17	70	233	0.5676	0.6296	0.9459	0.979	-0.36385
Ten-a	5_Junction_85506_Junction_85507	5_Junction_85506_Junction_85507	J001	0.0158814	15.4232	8.59256e-05	0.00144098	6.93075	4.18566	-1.6452	chrX	12189717	12192200	2484	+	58	25	4	3	0.4833	0.4808	0.1481	0.1429	0.33655
Ten-a	5_Junction_85506_Junction_85507	5_Junction_85506_Junction_85507	J002	0.0152999	15.539	8.0822e-05	0.0013693	7.13329	8.88466	0.803691	chrX	12189717	12206823	17107	+	62	27	23	18	0.5167	0.5192	0.8519	0.8571	-0.33655
Nhe2	5_Junction_8571_Junction_8572	5_Junction_8571_Junction_8572	J001	0.0340334	11.7947	0.000594005	0.00697326	6.70203	4.05699	-1.62596	chr2L	21129082	21130003	922	+	31	19	7	3	0.2199	0.2375	0.1077	0.0312	0.15925
Nhe2	5_Junction_8571_Junction_8572	5_Junction_8571_Junction_8572	J002	0.0283729	12.6711	0.00037136	0.00478511	10.6968	12.0833	0.533953	chr2L	21129082	21132032	2951	+	110	61	58	93	0.7801	0.7625	0.8923	0.9688	-0.15925
Sec16	5_Junction_85786_Junction_85787	5_Junction_85786_Junction_85787	J001	0.0442143	11.4356	0.000720488	0.00813488	7.9633	9.86702	0.821919	chrX	12498830	12498892	63	+	57	23	33	47	0.5816	0.4259	0.7857	0.8393	-0.30875
Sec16	5_Junction_85786_Junction_85787	5_Junction_85786_Junction_85787	J002	0.0456952	11.2485	0.000796894	0.00884562	7.67903	5.3947	-1.20305	chrX	12498830	12498895	66	+	41	31	9	9	0.4184	0.5741	0.2143	0.1607	0.30875
Tomosyn	5_Junction_85867_Junction_85869	5_Junction_85867_Junction_85869	J001	0.017161	9.17837	0.00244892	0.0216861	6.57316	4.34959	-1.34292	chrX	12534872	12537904	3033	+	27	28	7	3	0.1385	0.1657	0.0588	0.0448	0.1003
Tomosyn	5_Junction_85867_Junction_85869	5_Junction_85867_Junction_85869	J002	0.0147254	9.5346	0.00201634	0.0185279	12.4019	13.225	0.304211	chrX	12534872	12542568	7697	+	168	141	112	64	0.8615	0.8343	0.9412	0.9552	-0.1003
dpr8	5_Junction_88972_Junction_88974_Junction_88975	5_Junction_88972_Junction_88974_Junction_88975	J001	0.144851	16.8644	4.01468e-05	0.000768732	9.05388	13.6374	1.78092	chrX	14299309	14309694	10386	+	41	38	221	85	0.2092	0.181	0.834	0.5903	-0.51705
dpr8	5_Junction_88972_Junction_88974_Junction_88975	5_Junction_88972_Junction_88974_Junction_88975	J002	0.0142505	0.020694	0.885616	0.986792	6.54702	6.16787	-0.20197	chrX	14299309	14541847	242539	+	15	20	23	11	0.0765	0.0952	0.0868	0.0764	0.00425
dpr8	5_Junction_88972_Junction_88974_Junction_88975	5_Junction_88972_Junction_88974_Junction_88975	J003	0.248201	10.5016	0.0011927	0.0121638	13.9525	8.28502	-2.23119	chrX	14299309	14788295	488987	+	140	152	21	48	0.7143	0.7238	0.0792	0.3333	0.5128
Gbeta13F	5_Junction_91480_Junction_91481_Junction_91482_Junction_91484_Junction_91485_Junction_91490	5_Junction_91480_Junction_91481_Junction_91482_Junction_91484_Junction_91485_Junction_91490	J001	0.0909364	2.40084	0.12127	0.359363	11.4575	9.66279	-0.713223	chrX	15754283	15754776	494	+	87	39	70	62	0.3021	0.1554	0.1499	0.1016	0.103
Gbeta13F	5_Junction_91480_Junction_91481_Junction_91482_Junction_91484_Junction_91485_Junction_91490	5_Junction_91480_Junction_91481_Junction_91482_Junction_91484_Junction_91485_Junction_91490	J002	0.0180422	0.689893	0.406201	0.729503	6.02418	5.66368	-0.204264	chrX	15754283	15755020	738	+	11	12	18	17	0.0382	0.0478	0.0385	0.0279	0.0098
Gbeta13F	5_Junction_91480_Junction_91481_Junction_91482_Junction_91484_Junction_91485_Junction_91490	5_Junction_91480_Junction_91481_Junction_91482_Junction_91484_Junction_91485_Junction_91490	J003	0.0181145	1.90351	0.167685	0.441067	4.50281	6.00868	0.931425	chrX	15754283	15755147	865	+	6	6	15	25	0.0208	0.0239	0.0321	0.041	-0.0142
Gbeta13F	5_Junction_91480_Junction_91481_Junction_91482_Junction_91484_Junction_91485_Junction_91490	5_Junction_91480_Junction_91481_Junction_91482_Junction_91484_Junction_91485_Junction_91490	J004	0.0582367	0.421458	0.516211	0.815979	10.0157	11.1106	0.434649	chrX	15754283	15755183	901	+	32	50	100	97	0.1111	0.1992	0.2141	0.159	-0.0314
Gbeta13F	5_Junction_91480_Junction_91481_Junction_91482_Junction_91484_Junction_91485_Junction_91490	5_Junction_91480_Junction_91481_Junction_91482_Junction_91484_Junction_91485_Junction_91490	J005	0.00860143	12.9918	0.000312856	0.00415991	9.35982	7.40897	-0.871883	chrX	15754283	15755255	973	+	36	33	31	35	0.125	0.1315	0.0664	0.0574	0.06635
Gbeta13F	5_Junction_91480_Junction_91481_Junction_91482_Junction_91484_Junction_91485_Junction_91490	5_Junction_91480_Junction_91481_Junction_91482_Junction_91484_Junction_91485_Junction_91490	J006	0.0302916	4.09176	0.0430927	0.179314	13.8316	15.5609	0.61635	chrX	15754283	15755408	1126	+	116	111	233	374	0.4028	0.4422	0.4989	0.6131	-0.1335
eas	5_Junction_92408_Junction_92409	5_Junction_92408_Junction_92409	J001	0.0759403	16.5939	4.62986e-05	0.000866941	12.7074	9.92748	-1.07559	chrX	16172580	16174917	2338	+	64	103	75	68	0.9697	0.9537	0.7979	0.6415	0.242
eas	5_Junction_92408_Junction_92409	5_Junction_92408_Junction_92409	J002	0.081388	15.926	6.58672e-05	0.00115701	3.52264	6.98146	2.20049	chrX	16172580	16175009	2430	+	2	5	19	38	0.0303	0.0463	0.2021	0.3585	-0.242
nonA	5_Junction_92595_Junction_92597	5_Junction_92595_Junction_92597	J001	0.0211749	15.2253	9.54183e-05	0.00157759	11.4497	9.29155	-0.865139	chrX	16259675	16260935	1261	+	65	64	62	51	0.1633	0.2254	0.09	0.0752	0.11175
nonA	5_Junction_92595_Junction_92597	5_Junction_92595_Junction_92597	J002	0.0206155	15.5049	8.22917e-05	0.00138981	17.2303	18.7603	0.525951	chrX	16259675	16265345	5671	+	333	220	627	627	0.8367	0.7746	0.91	0.9248	-0.11175
CG4829	5_Junction_93249_Junction_93250	5_Junction_93249_Junction_93250	J001	0.0967285	5.51757	0.0188264	0.10088	9.16306	7.28331	-0.849489	chrX	16717239	16717618	380	+	31	24	33	42	0.9118	0.8276	0.7333	0.525	0.24055
CG4829	5_Junction_93249_Junction_93250	5_Junction_93249_Junction_93250	J002	0.1024	5.32332	0.0210418	0.108875	4.05697	6.16508	1.3423	chrX	16717239	16717888	650	+	3	5	12	38	0.0882	0.1724	0.2667	0.475	-0.24055
CG11596	5_Junction_95020_Junction_95021	5_Junction_95020_Junction_95021	J001	0.0286718	10.7121	0.00106438	0.0111246	3.19663	5.84298	1.89066	chrX	1822613	1823032	420	+	1	3	17	37	0.0625	0.1154	0.3333	0.4157	-0.28555
CG11596	5_Junction_95020_Junction_95021	5_Junction_95020_Junction_95021	J002	0.025706	11.0011	0.000910596	0.00980855	8.61093	7.11337	-0.694421	chrX	1822613	1823083	471	+	15	23	34	52	0.9375	0.8846	0.6667	0.5843	0.28555
CG14200	5_Junction_96746_Junction_96748	5_Junction_96746_Junction_96748	J001	0.0852437	15.025	0.000106095	0.00172227	8.05421	4.82261	-1.73665	chrX	19390820	19399798	8979	+	68	46	3	7	0.6239	0.5542	0.0698	0.2593	0.4245
CG14200	5_Junction_96746_Junction_96748	5_Junction_96746_Junction_96748	J002	0.0848767	15.0666	0.000103785	0.00169117	6.93368	9.99883	1.36891	chrX	19390820	19400514	9695	+	41	37	40	20	0.3761	0.4458	0.9302	0.7407	-0.4245
CoRest	5_Junction_96816_Junction_96817	5_Junction_96816_Junction_96817	J001	0.0228392	14.6912	0.000126633	0.00199632	6.69157	4.22727	-1.49305	chrX	19418196	19420872	2677	+	24	25	6	5	0.5333	0.5682	0.1538	0.25	0.34885
CoRest	5_Junction_96816_Junction_96817	5_Junction_96816_Junction_96817	J002	0.0217335	14.8953	0.000113648	0.00181966	6.13323	7.98897	0.92355	chrX	19418196	19422666	4471	+	21	19	33	15	0.4667	0.4318	0.8462	0.75	-0.34885
CG14619	5_Junction_98692_Junction_98694	5_Junction_98692_Junction_98694	J001	0.0996767	5.58939	0.0180696	0.0979741	10.3574	8.45922	-0.796703	chrX	21860096	21865373	5278	+	59	33	66	28	0.7108	0.7333	0.5546	0.3111	0.2892
CG14619	5_Junction_98692_Junction_98694	5_Junction_98692_Junction_98694	J002	0.100253	5.56499	0.0183232	0.0989989	7.25931	9.16832	0.863382	chrX	21860096	21867999	7904	+	24	12	53	62	0.2892	0.2667	0.4454	0.6889	-0.2892
l(1)G0196	5_Junction_98783_Junction_98785	5_Junction_98783_Junction_98785	J001	0.177416	4.10329	0.0427998	0.178591	9.24703	11.4801	0.895603	chrX	21900455	21904029	3575	+	26	39	81	137	0.4	0.5735	0.6585	0.8726	-0.2788
l(1)G0196	5_Junction_98783_Junction_98785	5_Junction_98783_Junction_98785	J002	0.179785	4.05603	0.0440138	0.181889	9.32523	7.16903	-0.973757	chrX	21900455	21904470	4016	+	39	29	42	20	0.6	0.4265	0.3415	0.1274	0.2788
l(1)G0196	5_Junction_98797_Junction_98799	5_Junction_98797_Junction_98799	J001	0.0111567	64.6899	8.7664e-16	1.82155e-13	10.3112	5.96631	-2.00574	chrX	21905576	21906063	488	+	60	55	17	14	0.5556	0.5238	0.1298	0.112	0.4188
l(1)G0196	5_Junction_98797_Junction_98799	5_Junction_98797_Junction_98799	J002	0.0107096	65.5863	5.56248e-16	1.20132e-13	9.74842	12.5298	1.08302	chrX	21905576	21906868	1293	+	48	50	114	111	0.4444	0.4762	0.8702	0.888	-0.4188

## Sheet: AS intron retention events
Gene	AS_event_ID	AS_structure_ID	sub_junction_ID	sub-junction_dispersion_estimate	LRT_statistic-full_vs_reduced	LRT_p_value-full_vs_reduced	BH_adjusted_p-values	DN1	LNv	fitting_parameter_log2fold_change_LNv_DN1	sub_junction_chr	sub_junction_start_coor	sub_junction_end_coor	sub_junction_size	sub_junction_strand	raw_count.DN1_A	raw_count.DN1_B	raw_count.LNv_A	raw_count.LNv_B	percentage_usage.DN1_A	percentage_usage.DN1_B	percentage_usage.LNv_A	percentage_usage.LNv_B	deltaPSI
Trn-SR	intronretention_Junction_10011	intronretentionleft-Junction_10011	J001	0.0201761	8.88168	0.00288047	0.0246344	11.0803	9.71217	-0.54711	chr2L	2763088	2763149	62	+	123	75	77	0	0.7785	0.8152	0.5833	INF
Trn-SR	intronretention_Junction_10011	intronretentionleft-Junction_10011	J002	0.0220663	8.47888	0.00359293	0.0292548	6.67999	8.57621	0.897321	chr2L	2763018	2763136	119	+	35	17	55	0	0.2215	0.1848	0.4167	INF
Trn-SR	intronretention_Junction_10011	intronretentionright-Junction_10011	J001	0.0164301	5.71545	0.0168163	0.0930588	11.0021	9.79324	-0.483256	chr2L	2763088	2763149	62	+	123	75	77	0	0.5857	0.6303	0.4326	INF
Trn-SR	intronretention_Junction_10011	intronretentionright-Junction_10011	J002	0.0166235	5.6776	0.0171828	0.0945835	9.5133	10.7607	0.504424	chr2L	2763102	2763217	116	+	87	44	101	0	0.4143	0.3697	0.5674	INF	-0.196284
Syt1	intronretention_Junction_10032	intronretentionleft-Junction_10032	J001	0.00824419	34.4156	4.45143e-09	2.65741e-07	17.4638	19.3846	0.658342	chr2L	2772450	2785077	12628	-	464	377	678	334	0.1524	0.1764	0.3233	0.292
Syt1	intronretention_Junction_10032	intronretentionleft-Junction_10032	J002	0.00822131	34.498	4.26695e-09	2.55914e-07	24.4197	22.7548	-0.559345	chr2L	2772380	2772498	119	-	2580	1760	1419	810	0.8476	0.8236	0.6767	0.708
Syt1	intronretention_Junction_10032	intronretentionright-Junction_10032	J001	0.0645329	22.8895	1.7159e-06	5.06778e-05	16.7238	20.1299	1.16806	chr2L	2772450	2785077	12628	-	464	377	678	334	0.6237	0.6568	0.8874	0.9489
Syt1	intronretention_Junction_10032	intronretentionright-Junction_10032	J002	0.0649005	22.777	1.81926e-06	5.31214e-05	14.3806	10.8984	-1.2966	chr2L	2785030	2785145	116	-	280	197	86	18	0.3763	0.3432	0.1126	0.0511	0.148451
RpS21	intronretention_Junction_10156	intronretentionleft-Junction_10156	J001	0.00556288	47.4982	5.50549e-12	6.28778e-10	26.8149	25.1846	-0.545698	chr2L	2856568	2856629	62	+	4422	4028	1890	1572	0.4807	0.5057	0.3304	0.2995
RpS21	intronretention_Junction_10156	intronretentionleft-Junction_10156	J002	0.00556214	47.5041	5.48881e-12	6.27986e-10	26.9325	28.5312	0.534257	chr2L	2856496	2856616	121	+	4778	3937	3831	3676	0.5193	0.4943	0.6696	0.7005
RpS21	intronretention_Junction_10156	intronretentionright-Junction_10156	J001	0.0269856	80.2627	3.27807e-19	1.06643e-16	28.3178	23.6869	-1.55044	chr2L	2856568	2856629	62	+	4422	4028	1890	1572	0.8563	0.8402	0.4452	0.3432
RpS21	intronretention_Junction_10156	intronretentionright-Junction_10156	J002	0.026994	80.2383	3.31871e-19	1.07423e-16	20.9288	25.5962	1.56982	chr2L	2856582	2856704	123	+	742	766	2355	3009	0.1437	0.1598	0.5548	0.6568	-0.240857
cib	intronretention_Junction_103348	intronretentionleft-Junction_103348	J001	0.0109026	10.8331	0.000997016	0.0105785	15.6072	14.3245	-0.455196	chrX	4004043	4004183	141	+	98	126	395	311	0.5185	0.6058	0.4031	0.4208
cib	intronretention_Junction_103348	intronretentionleft-Junction_103348	J002	0.0108739	10.8515	0.00098714	0.0104911	14.525	15.7901	0.447722	chrX	4003972	4004091	120	+	91	82	585	428	0.4815	0.3942	0.5969	0.5792
cib	intronretention_Junction_103348	intronretentionright-Junction_103348	J001	0.0380877	4.36361	0.0367144	0.160541	15.5445	14.4004	-0.405955	chrX	4004043	4004183	141	+	98	126	395	311	0.8909	0.8289	0.7869	0.71
cib	intronretention_Junction_103348	intronretentionright-Junction_103348	J002	0.0387363	4.31573	0.0377616	0.163642	8.83365	10.1878	0.564641	chrX	4004136	4004238	103	+	12	26	107	127	0.1091	0.1711	0.2131	0.29	-0.151758
CG3568	intronretention_Junction_104172	intronretentionleft-Junction_104172	J001	0.00800406	9.8747	0.00167567	0.0160048	15.6455	16.442	0.278694	chrX	4438209	4438265	57	+	181	166	351	423	0.7605	0.758	0.8667	0.8393
CG3568	intronretention_Junction_104172	intronretentionleft-Junction_104172	J002	0.00831273	9.71725	0.00182547	0.0170994	11.1216	9.66419	-0.582951	chrX	4438136	4438257	122	+	57	53	54	81	0.2395	0.242	0.1333	0.1607
CG3568	intronretention_Junction_104172	intronretentionright-Junction_104172	J001	0.0123568	15.8203	6.96506e-05	0.00121027	15.3908	16.7019	0.45882	chrX	4438209	4438265	57	+	181	166	351	423	0.6418	0.6831	0.8337	0.7936
CG3568	intronretention_Junction_104172	intronretentionright-Junction_104172	J002	0.0126227	15.6148	7.76458e-05	0.00132525	12.7041	10.9272	-0.675307	chrX	4438218	4438338	121	+	101	77	70	110	0.3582	0.3169	0.1663	0.2064	0.166569
l(1)G0334	intronretention_Junction_104462	intronretentionleft-Junction_104462	J001	0.0204177	24.1652	8.84149e-07	2.82919e-05	18.3423	20.4677	0.724303	chrX	4598550	4598619	70	+	369	425	968	712	0.5371	0.6334	0.8047	0.8054
l(1)G0334	intronretention_Junction_104462	intronretentionleft-Junction_104462	J002	0.0204887	24.0919	9.18471e-07	2.92304e-05	16.8561	14.5575	-0.808025	chrX	4598477	4598598	122	+	318	246	235	172	0.4629	0.3666	0.1953	0.1946
l(1)G0334	intronretention_Junction_104462	intronretentionright-Junction_104462	J001	0.0172512	16.0847	6.05728e-05	0.00108111	18.6077	20.1991	0.542274	chrX	4598550	4598619	70	+	369	425	968	712	0.4725	0.547	0.6765	0.7185
l(1)G0334	intronretention_Junction_104462	intronretentionright-Junction_104462	J002	0.0172764	16.064	6.12388e-05	0.00109038	18.4042	16.7512	-0.570078	chrX	4598572	4598691	120	+	412	352	463	279	0.5275	0.453	0.3235	0.2815	0.221019
snf	intronretention_Junction_105281	intronretentionleft-Junction_105281	J001	0.0409326	4.33016	0.0374427	0.162786	20.7476	19.4952	-0.425234	chrX	5203739	5204163	425	+	953	742	603	514	0.9068	0.9172	0.8803	0.8031
snf	intronretention_Junction_105281	intronretentionleft-Junction_105281	J002	0.041403	4.28676	0.0384104	0.165684	11.2436	12.6301	0.52478	chrX	5203677	5203787	111	+	98	67	82	126	0.0932	0.0828	0.1197	0.1969
snf	intronretention_Junction_105281	intronretentionright-Junction_105281	J001	0.0241945	6.40517	0.0113788	0.0699609	20.702	19.541	-0.394221	chrX	5203739	5204163	425	+	953	742	603	514	0.8727	0.8291	0.7841	0.7332
snf	intronretention_Junction_105281	intronretentionright-Junction_105281	J002	0.0243553	6.36853	0.0116162	0.0711327	13.4547	14.762	0.47042	chrX	5204116	5204237	122	+	139	153	166	187	0.1273	0.1709	0.2159	0.2668	-0.121024
CG42492	intronretention_Junction_105713	intronretentionleft-Junction_105713	J001	0.0171406	7.95857	0.00478601	0.0365052	6.99695	8.43886	0.676191	chrX	5523057	5523416	360	-	32	25	34	19	0.3902	0.4167	0.68	0.5758
CG42492	intronretention_Junction_105713	intronretentionleft-Junction_105713	J002	0.0170179	7.97741	0.00473646	0.0362431	8.20945	6.71611	-0.715485	chrX	5523009	5523105	97	-	50	35	16	14	0.6098	0.5833	0.32	0.4242
CG42492	intronretention_Junction_105713	intronretentionright-Junction_105713	J001	0.0142025	6.70407	0.00961933	0.0616878	7.00379	8.43256	0.669987	chrX	5523057	5523416	360	-	32	25	34	19	0.2443	0.2976	0.4304	0.4524
CG42492	intronretention_Junction_105713	intronretentionright-Junction_105713	J002	0.0134557	6.82846	0.00897167	0.058657	10.3172	9.26156	-0.433814	chrX	5523369	5523481	113	-	99	59	45	23	0.7557	0.7024	0.5696	0.5476	0.15515
CG42492	intronretention_Junction_105722	intronretentionleft-Junction_105722	J001	0.0169914	9.12879	0.00251618	0.0221811	13.6349	12.648	-0.362028	chrX	5527299	5527385	87	-	189	193	96	71	0.8915	0.919	0.768	0.8256
CG42492	intronretention_Junction_105722	intronretentionleft-Junction_105722	J002	0.0191729	8.6878	0.00320346	0.0267637	5.96866	7.9097	0.97797	chrX	5527251	5527347	97	-	23	17	29	15	0.1085	0.081	0.232	0.1744
CG42492	intronretention_Junction_105722	intronretentionright-Junction_105722	J001	0.0587353	5.07979	0.0242064	0.12045	13.9155	12.3762	-0.564774	chrX	5527299	5527385	87	-	189	193	96	71	0.9043	0.9147	0.7273	0.8659
CG42492	intronretention_Junction_105722	intronretentionright-Junction_105722	J002	0.0623768	4.84899	0.0276623	0.132184	6.02207	7.88031	0.934721	chrX	5527338	5527438	101	-	20	18	36	11	0.0957	0.0853	0.2727	0.1341	-0.166457
Plc21C	intronretention_Junction_10593	intronretentionleft-Junction_10593	J001	0.0750919	6.21239	0.0126859	0.0758026	5.39364	7.3165	1.03094	chr2L	343729	344022	294	+	15	0	32	46	0.3659	INF	0.6531	0.7931
Plc21C	intronretention_Junction_10593	intronretentionleft-Junction_10593	J002	0.0798385	5.97818	0.0144839	0.0834688	6.80683	4.75239	-1.18437	chr2L	343682	343777	96	+	26	0	17	12	0.6341	INF	0.3469	0.2069
Plc21C	intronretention_Junction_10593	intronretentionright-Junction_10593	J001	0.0324491	10.5469	0.00116386	0.0119381	5.38631	7.35654	1.0547	chr2L	343729	344022	294	+	15	0	32	46	0.3571	INF	0.6957	0.7667
Plc21C	intronretention_Junction_10593	intronretentionright-Junction_10593	J002	0.0356258	10.1311	0.00145792	0.01432	6.91028	4.7133	-1.26278	chr2L	343975	344069	95	+	27	0	14	14	0.6429	INF	0.3043	0.2333	0.352824
CG12795	intronretention_Junction_10610	intronretentionleft-Junction_10610	J001	0.066423	5.68461	0.0171143	0.0943191	10.2256	12.0261	0.70014	chr2L	3453278	3453427	150	+	79	76	146	0	0.798	0.6847	0.9182	INF
CG12795	intronretention_Junction_10610	intronretentionleft-Junction_10610	J002	0.072511	5.32029	0.0210785	0.108986	6.90567	4.66348	-1.29407	chr2L	3453218	3453326	109	+	20	35	13	0	0.202	0.3153	0.0818	INF
CG12795	intronretention_Junction_10610	intronretentionright-Junction_10610	J001	0.0139136	15.0275	0.000105956	0.00172089	10.3933	11.8779	0.576854	chr2L	3453278	3453427	150	+	79	76	146	0	0.627	0.6281	0.8538	INF
CG12795	intronretention_Junction_10610	intronretentionright-Junction_10610	J002	0.0149253	14.5637	0.000135503	0.00210676	8.58999	6.11729	-1.20183	chr2L	3453380	3453488	109	+	47	45	25	0	0.373	0.3719	0.1462	INF	0.279341
tim	intronretention_Junction_10660	intronretentionleft-Junction_10660	J001	0.00455013	30.3417	3.62258e-08	1.71325e-06	24.6082	23.3833	-0.411203	chr2L	3494621	3495478	858	-	1425	1717	2081	1560	0.5447	0.5836	0.425	0.4255
tim	intronretention_Junction_10660	intronretentionleft-Junction_10660	J002	0.00454984	30.3434	3.6194e-08	1.71301e-06	23.4557	24.6784	0.410396	chr2L	3494551	3494669	119	-	1191	1225	2816	2106	0.4553	0.4164	0.575	0.5745
tim	intronretention_Junction_10660	intronretentionright-Junction_10660	J001	0.00562765	13.4077	0.000250587	0.00347125	24.4305	23.5615	-0.29173	chr2L	3494621	3495478	858	-	1425	1717	2081	1560	0.6874	0.7142	0.6214	0.5918
tim	intronretention_Junction_10660	intronretentionright-Junction_10660	J002	0.00563296	13.3968	0.000252051	0.00348703	20.7423	21.6815	0.317549	chr2L	3495431	3495552	122	-	648	687	1268	1076	0.3126	0.2858	0.3786	0.4082	-0.121594
Pat1	intronretention_Junction_106797	intronretentionleft-Junction_106797	J001	0.0139539	47.482	5.55109e-12	6.32864e-10	10.4665	6.56014	-1.74796	chrX	6489993	6490049	57	+	53	40	20	30	0.3487	0.2899	0.0673	0.084
Pat1	intronretention_Junction_106797	intronretentionleft-Junction_106797	J002	0.0130689	48.8812	2.71941e-12	3.23786e-10	13.3371	15.4526	0.757849	chrX	6489930	6490041	112	+	99	98	277	327	0.6513	0.7101	0.9327	0.916
Pat1	intronretention_Junction_106797	intronretentionright-Junction_106797	J001	0.0113987	28.1886	1.10052e-07	4.57546e-06	9.93311	6.98185	-1.31805	chrX	6489993	6490049	57	+	53	40	20	30	0.2819	0.2516	0.0797	0.1034
Pat1	intronretention_Junction_106797	intronretentionright-Junction_106797	J002	0.0106544	28.9468	7.43955e-08	3.24669e-06	13.7436	15.213	0.525467	chrX	6490002	6490122	121	+	135	119	231	260	0.7181	0.7484	0.9203	0.8966	-0.126905
CG42308	intronretention_Junction_107663	intronretentionleft-Junction_107663	J001	0.00588739	13.1431	0.000288587	0.0038979	16.2744	15.4222	-0.298868	chrX	6905789	6905849	61	+	379	308	238	121	0.8348	0.8415	0.7234	0.7423
CG42308	intronretention_Junction_107663	intronretentionleft-Junction_107663	J002	0.00608845	12.969	0.000316698	0.00420009	9.89013	11.5083	0.639303	chrX	6905728	6905837	110	+	75	58	91	42	0.1652	0.1585	0.2766	0.2577
CG42308	intronretention_Junction_107663	intronretentionright-Junction_107663	J001	0.00617221	19.0198	1.29367e-05	0.000291977	16.3615	15.3356	-0.35983	chrX	6905789	6905849	61	+	379	308	238	121	0.8594	0.8532	0.7212	0.7423
CG42308	intronretention_Junction_107663	intronretentionright-Junction_107663	J002	0.00640303	18.7423	1.49624e-05	0.000329839	9.45965	11.4566	0.79727	chrX	6905802	6905912	111	+	62	53	92	42	0.1406	0.1468	0.2788	0.2577	-0.157008
CG43707	intronretention_Junction_10847	intronretentionleft-Junction_10847	J001	0.00840366	4.55445	0.0328332	0.148739	14.8338	15.3371	0.178277	chr2L	3758919	3758979	61	+	191	177	197	260	0.8341	0.8157	0.8914	0.8784
CG43707	intronretention_Junction_10847	intronretentionleft-Junction_10847	J002	0.009007	4.45123	0.0348761	0.154739	8.99007	7.8318	-0.515598	chr2L	3758856	3758967	112	+	38	40	24	36	0.1659	0.1843	0.1086	0.1216
CG43707	intronretention_Junction_10847	intronretentionright-Junction_10847	J001	0.024307	7.54278	0.00602512	0.0434167	14.4568	15.725	0.44923	chr2L	3758919	3758979	61	+	191	177	197	260	0.6181	0.7166	0.814	0.7951
CG43707	intronretention_Junction_10847	intronretentionright-Junction_10847	J002	0.0246489	7.46551	0.00628923	0.044893	11.7745	10.2529	-0.593883	chr2L	3758932	3759051	120	+	118	70	45	67	0.3819	0.2834	0.186	0.2049	0.144849
CG3714	intronretention_Junction_11072	intronretentionleft-Junction_11072	J001	0.0188181	15.9911	6.36412e-05	0.00112416	6.55091	3.66433	-1.86069	chr2L	4192968	4193308	341	-	22	20	3	6	0.2292	0.2353	0.04	0.0732
CG3714	intronretention_Junction_11072	intronretentionleft-Junction_11072	J002	0.0157646	16.6929	4.39455e-05	0.000832251	10.4003	11.5584	0.452385	chr2L	4192901	4193016	116	-	74	65	72	76	0.7708	0.7647	0.96	0.9268
CG3714	intronretention_Junction_11072	intronretentionright-Junction_11072	J001	0.128186	16.0236	6.25564e-05	0.00111006	6.87815	3.47426	-2.19071	chr2L	4192968	4193308	341	-	22	20	3	6	0.3548	0.6452	0.0588	0.0714
CG3714	intronretention_Junction_11072	intronretentionright-Junction_11072	J002	0.121031	16.632	4.53781e-05	0.00085268	7.35912	10.5566	1.38378	chr2L	4193261	4193354	94	-	40	11	48	78	0.6452	0.3548	0.9412	0.9286	-0.154104
tutl	intronretention_Junction_11140	intronretentionleft-Junction_11140	J001	0.171629	4.43263	0.0352582	0.155834	11.5831	8.91916	-1.07484	chr2L	4308426	4308774	349	+	123	99	27	34	0.5721	0.6111	0.1579	0.4416
tutl	intronretention_Junction_11140	intronretentionleft-Junction_11140	J002	0.171367	4.43898	0.0351271	0.155468	10.2396	12.961	1.04284	chr2L	4308361	4308474	114	+	92	63	144	43	0.4279	0.3889	0.8421	0.5584
tutl	intronretention_Junction_11140	intronretentionright-Junction_11140	J001	0.109413	6.85942	0.00881753	0.057902	11.5476	8.95004	-1.04797	chr2L	4308426	4308774	349	+	123	99	27	34	0.5256	0.547	0.1475	0.3505
tutl	intronretention_Junction_11140	intronretentionright-Junction_11140	J002	0.108975	6.88417	0.00869625	0.0573171	11.014	13.635	0.982667	chr2L	4308727	4308838	112	+	111	82	156	63	0.4744	0.453	0.8525	0.6495	-0.228806
CG32699	intronretention_Junction_111440	intronretentionleft-Junction_111440	J001	0.011394	4.85778	0.0275218	0.131757	9.98072	9.02428	-0.398738	chrX	9467359	9467435	77	-	78	53	23	46	0.5652	0.5824	0.3898	0.46
CG32699	intronretention_Junction_111440	intronretentionleft-Junction_111440	J002	0.0114487	4.85037	0.0276402	0.132147	8.97659	9.94041	0.402744	chrX	9467295	9467407	113	-	60	38	36	54	0.4348	0.4176	0.6102	0.54
CG32699	intronretention_Junction_111440	intronretentionright-Junction_111440	J001	0.0186602	17.3592	3.09403e-05	0.000617597	10.5509	8.49745	-0.856894	chrX	9467359	9467435	77	-	78	53	23	46	0.661	0.5761	0.3026	0.3622
CG32699	intronretention_Junction_111440	intronretentionright-Junction_111440	J002	0.0186246	17.375	3.06828e-05	0.000613028	8.81064	10.8047	0.820072	chrX	9467388	9467498	111	-	40	39	53	81	0.339	0.4239	0.6974	0.6378	-0.193197
NONE	intronretention_Junction_111706	intronretentionleft-Junction_111706	J001	0.0278103	17.4706	2.91779e-05	0.000587493	3.23059	6.17076	2.04073	chrX	9817	9880	64	-	2	4	24	18	0.1667	0.1176	0.5333	0.6
NONE	intronretention_Junction_111706	intronretentionleft-Junction_111706	J002	0.0254568	17.8708	2.36416e-05	0.000488876	7.58149	5.55343	-1.06256	chrX	9769	9865	97	-	10	30	21	12	0.8333	0.8824	0.4667	0.4
NONE	intronretention_Junction_111706	intronretentionright-Junction_111706	J001	0.0279582	4.15593	0.0414889	0.175037	3.82609	5.27792	1.01134	chrX	9817	9880	64	-	2	4	24	18	0.1429	0.2667	0.4068	0.4737
NONE	intronretention_Junction_111706	intronretentionright-Junction_111706	J002	0.025558	4.227	0.0397858	0.169775	6.95608	5.93885	-0.537269	chrX	9833	9915	83	-	12	11	35	20	0.8571	0.7333	0.5932	0.5263	0.243889
CG31650	intronretention_Junction_11868	intronretentionleft-Junction_11868	J001	0.00609023	38.7821	4.7386e-10	3.50841e-08	18.4686	16.6194	-0.637918	chr2L	5042890	5042959	70	-	184	199	850	596	0.6073	0.6611	0.4069	0.4257
CG31650	intronretention_Junction_11868	intronretentionleft-Junction_11868	J002	0.00608272	38.8111	4.66864e-10	3.47258e-08	16.1542	18.0578	0.659174	chr2L	5042822	5042938	117	-	119	102	1239	804	0.3927	0.3389	0.5931	0.5743
CG31650	intronretention_Junction_11868	intronretentionright-Junction_11868	J001	0.00331744	20.6096	5.63141e-06	0.000143037	18.0865	16.9935	-0.377006	chr2L	5042890	5042959	70	-	184	199	850	596	0.6389	0.6503	0.5015	0.5169
CG31650	intronretention_Junction_11868	intronretentionright-Junction_11868	J002	0.00332081	20.6003	5.65887e-06	0.000143621	15.6025	16.8625	0.440008	chr2L	5042912	5043031	120	-	104	107	845	557	0.3611	0.3497	0.4985	0.4831	-0.172789
CG34180	intronretention_Junction_12696	intronretentionleft-Junction_12696	J001	0.0229842	24.1729	8.80624e-07	2.82071e-05	7.68673	2.36313	-3.73679	chr2L	6060614	6060666	53	+	101	121	0	1	0.6352	0.5708	INF	0.0417
CG34180	intronretention_Junction_12696	intronretentionleft-Junction_12696	J002	0.0233783	24.0757	9.26217e-07	2.94333e-05	6.53727	9.48769	1.36127	chr2L	6060543	6060662	120	+	58	91	0	23	0.3648	0.4292	INF	0.9583
CG34180	intronretention_Junction_12696	intronretentionright-Junction_12696	J001	0.0642012	28.0431	1.18643e-07	4.90516e-06	7.87636	2.29551	-3.91085	chr2L	6060614	6060666	53	+	101	121	0	1	0.8211	0.7246	INF	0.0417
CG34180	intronretention_Junction_12696	intronretentionright-Junction_12696	J002	0.0678813	27.3222	1.7222e-07	6.79743e-06	4.76929	9.30646	2.31968	chr2L	6060619	6060736	118	+	22	46	0	23	0.1789	0.2754	INF	0.9583	-0.492225
Cpr	intronretention_Junction_12843	intronretentionleft-Junction_12843	J001	0.00905685	9.34336	0.00223794	0.0201565	15.0948	15.8976	0.28279	chr2L	6345679	6345741	63	+	349	401	169	105	0.7896	0.8134	0.8848	0.9052
Cpr	intronretention_Junction_12843	intronretentionleft-Junction_12843	J002	0.00945717	9.2079	0.00240973	0.0213979	9.70979	8.00154	-0.739812	chr2L	6345613	6345727	115	+	93	92	22	11	0.2104	0.1866	0.1152	0.0948
Cpr	intronretention_Junction_12843	intronretentionright-Junction_12843	J001	0.0123643	4.05959	0.0439211	0.181623	15.1261	15.8665	0.260826	chr2L	6345679	6345741	63	+	349	401	169	105	0.5288	0.5923	0.6602	0.6481
Cpr	intronretention_Junction_12843	intronretentionright-Junction_12843	J002	0.0123989	4.05218	0.0441144	0.182165	14.1026	13.2744	-0.300349	chr2L	6345694	6345815	122	+	311	276	87	57	0.4712	0.4077	0.3398	0.3519	0.114957
CG9548	intronretention_Junction_12945	intronretentionleft-Junction_12945	J001	0.0519669	23.977	9.74914e-07	3.07985e-05	13.8759	10.4532	-1.29098	chr2L	6490222	6490286	65	-	83	119	78	106	0.6975	0.838	0.3714	0.3453
CG9548	intronretention_Junction_12945	intronretentionleft-Junction_12945	J002	0.0520011	23.9645	9.81283e-07	3.09693e-05	9.19279	12.693	1.37556	chr2L	6490162	6490270	109	-	36	23	132	201	0.3025	0.162	0.6286	0.6547
CG9548	intronretention_Junction_12945	intronretentionright-Junction_12945	J001	0.0539919	5.6659	0.0172978	0.0950052	12.9706	11.2955	-0.630655	chr2L	6490222	6490286	65	-	83	119	78	106	0.5253	0.6919	0.3697	0.4274
CG9548	intronretention_Junction_12945	intronretentionright-Junction_12945	J002	0.0539896	5.66611	0.0172958	0.0950022	11.1432	12.8219	0.634728	chr2L	6490239	6490359	121	-	75	53	133	142	0.4747	0.3081	0.6303	0.5726	-0.287303
Nhe3	intronretention_Junction_13098	intronretentionleft-Junction_13098	J001	0.00477167	18.9901	1.31402e-05	0.000296051	18.2553	17.2193	-0.356801	chr2L	6680114	6680173	60	-	360	317	545	357	0.7087	0.6982	0.5879	0.5561
Nhe3	intronretention_Junction_13098	intronretentionleft-Junction_13098	J002	0.00479386	18.9412	1.34811e-05	0.000302568	14.6787	15.9736	0.457207	chr2L	6680044	6680162	119	-	148	137	382	285	0.2913	0.3018	0.4121	0.4439
Nhe3	intronretention_Junction_13098	intronretentionright-Junction_13098	J001	0.00286601	32.1478	1.42877e-08	7.51289e-07	18.3556	17.122	-0.424836	chr2L	6680114	6680173	60	-	360	317	545	357	0.6061	0.6228	0.4599	0.4673
Nhe3	intronretention_Junction_13098	intronretentionright-Junction_13098	J002	0.00286805	32.1364	1.43719e-08	7.54482e-07	16.4163	17.7432	0.459502	chr2L	6680126	6680239	114	-	234	192	640	407	0.3939	0.3772	0.5401	0.5327	-0.143882
CG17378	intronretention_Junction_13196	intronretentionleft-Junction_13196	J001	0.0457152	9.63119	0.00191301	0.0177762	13.2063	11.1031	-0.791719	chr2L	6777426	6777498	73	+	174	131	66	60	0.6468	0.6583	0.3188	0.4839
CG17378	intronretention_Junction_13196	intronretentionleft-Junction_13196	J002	0.045842	9.60901	0.00193625	0.0179378	10.8119	12.9322	0.804787	chr2L	6777363	6777474	112	+	95	68	141	64	0.3532	0.3417	0.6812	0.5161
CG17378	intronretention_Junction_13196	intronretentionright-Junction_13196	J001	0.0974667	12.2056	0.000476464	0.00585258	13.7269	10.6181	-1.1715	chr2L	6777426	6777498	73	+	174	131	66	60	0.8614	0.7278	0.5	0.3571
CG17378	intronretention_Junction_13196	intronretentionright-Junction_13196	J002	0.0981669	12.1292	0.000496372	0.00607511	8.7384	11.8482	1.25405	chr2L	6777451	6777572	122	+	28	49	66	108	0.1386	0.2722	0.5	0.6429	-0.306853
SA	intronretention_Junction_13333	intronretentionleft-Junction_13333	J001	0.0386108	5.35848	0.0206218	0.10747	10.4198	8.94524	-0.609548	chr2L	6953724	6953785	62	+	92	65	37	27	0.6815	0.6373	0.3854	0.5625
SA	intronretention_Junction_13333	intronretentionleft-Junction_13333	J002	0.0392085	5.30071	0.0213167	0.109822	8.13979	9.69039	0.668851	chr2L	6953653	6953772	120	+	43	37	59	21	0.3185	0.3627	0.6146	0.4375
SA	intronretention_Junction_13333	intronretentionright-Junction_13333	J001	0.0482615	4.36931	0.0365919	0.160135	10.404	8.95823	-0.597687	chr2L	6953724	6953785	62	+	92	65	37	27	0.6479	0.6915	0.3895	0.587
SA	intronretention_Junction_13333	intronretentionright-Junction_13333	J002	0.0489913	4.32071	0.0376512	0.163307	8.05679	9.5674	0.655662	chr2L	6953738	6953857	120	+	50	29	58	19	0.3521	0.3085	0.6105	0.413	-0.175118
CG3476	intronretention_Junction_13391	intronretentionleft-Junction_13391	J001	0.0564085	8.88453	0.00287597	0.024613	12.3194	10.4748	-0.71061	chr2L	7028666	7028725	60	+	90	78	106	48	0.7563	0.8764	0.6092	0.5275
CG3476	intronretention_Junction_13391	intronretentionleft-Junction_13391	J002	0.0582413	8.69679	0.00318771	0.0266718	7.29542	9.33244	0.915159	chr2L	7028593	7028714	122	+	29	11	68	43	0.2437	0.1236	0.3908	0.4725
CG3476	intronretention_Junction_13391	intronretentionright-Junction_13391	J001	0.0118745	11.011	0.000905718	0.00976712	11.9456	10.8424	-0.424674	chr2L	7028666	7028725	60	+	90	78	106	48	0.8491	0.8387	0.6625	0.7059
CG3476	intronretention_Junction_13391	intronretentionright-Junction_13391	J002	0.0128301	10.721	0.00105929	0.0110836	6.33953	8.30804	0.956655	chr2L	7028678	7028792	115	+	16	15	54	20	0.1509	0.1613	0.3375	0.2941	-0.259661
CG11266	intronretention_Junction_13400	intronretentionleft-Junction_13400	J001	0.0137906	12.7605	0.000354011	0.00459003	11.4119	9.73522	-0.665836	chr2L	7032839	7032902	64	+	89	75	41	59	0.4785	0.5515	0.3361	0.295
CG11266	intronretention_Junction_13400	intronretentionleft-Junction_13400	J002	0.013637	12.8339	0.000340391	0.00444205	11.2516	12.7073	0.550343	chr2L	7032771	7032887	117	+	97	61	81	141	0.5215	0.4485	0.6639	0.705
CG11266	intronretention_Junction_13400	intronretentionright-Junction_13400	J001	0.00790731	20.2378	6.83874e-06	0.000168843	11.607	9.55212	-0.816372	chr2L	7032839	7032902	64	+	89	75	41	59	0.289	0.3304	0.1595	0.1582
CG11266	intronretention_Junction_13400	intronretentionright-Junction_13400	J002	0.00767468	20.5014	5.95878e-06	0.000149813	14.7978	15.993	0.421612	chr2L	7032855	7032974	120	+	219	152	216	314	0.711	0.6696	0.8405	0.8418	-0.122041
CG4495	intronretention_Junction_13492	intronretentionleft-Junction_13492	J001	0.00871171	23.4422	1.28722e-06	3.97483e-05	15.5513	14.0484	-0.534719	chr2L	7183986	7184041	56	+	199	198	193	175	0.7804	0.7557	0.5514	0.5993
CG4495	intronretention_Junction_13492	intronretentionleft-Junction_13492	J002	0.00883394	23.2721	1.40629e-06	4.27487e-05	10.8633	12.8747	0.763403	chr2L	7183919	7184034	116	+	56	64	157	117	0.2196	0.2443	0.4486	0.4007
CG4495	intronretention_Junction_13492	intronretentionright-Junction_13492	J001	0.0399807	12.0558	0.000516324	0.00625865	15.8627	13.7505	-0.751686	chr2L	7183986	7184041	56	+	199	198	193	175	0.8223	0.8426	0.553	0.6863
CG4495	intronretention_Junction_13492	intronretentionright-Junction_13492	J002	0.0403924	11.9562	0.000544657	0.00651985	9.66236	11.9902	0.916243	chr2L	7183994	7184102	109	+	43	37	156	80	0.1777	0.1574	0.447	0.3137	-0.23907
CG4495	intronretention_Junction_13496	intronretentionleft-Junction_13496	J001	0.128037	7.49213	0.00619691	0.0443572	10.2456	7.99945	-0.958888	chr2L	7184394	7184613	220	+	83	54	42	11	0.883	0.7714	0.6087	0.3548
CG4495	intronretention_Junction_13496	intronretentionleft-Junction_13496	J002	0.132677	7.30086	0.00689216	0.0482032	5.39282	7.6558	1.19327	chr2L	7184359	7184442	84	+	11	16	27	20	0.117	0.2286	0.3913	0.6452
CG4495	intronretention_Junction_13496	intronretentionright-Junction_13496	J001	0.177463	11.7254	0.000616524	0.00719174	11.0214	7.34265	-1.57452	chr2L	7184394	7184613	220	+	83	54	42	11	0.6194	0.587	0.2428	0.0679
CG4495	intronretention_Junction_13496	intronretentionright-Junction_13496	J002	0.175992	11.8121	0.000588458	0.00692209	9.49213	13.3057	1.47523	chr2L	7184566	7184680	115	+	51	38	131	151	0.3806	0.413	0.7572	0.9321	-0.400987
ico	intronretention_Junction_13532	intronretentionleft-Junction_13532	J001	0.102434	6.76434	0.00929974	0.0600922	14.6601	12.3945	-0.825007	chr2L	7220677	7220740	64	-	226	251	109	53	0.8828	0.8901	0.7842	0.5521
ico	intronretention_Junction_13532	intronretentionleft-Junction_13532	J002	0.104965	6.62463	0.0100578	0.0638479	7.23937	9.50898	1.01628	chr2L	7220612	7220725	114	-	30	31	30	43	0.1172	0.1099	0.2158	0.4479
ico	intronretention_Junction_13532	intronretentionright-Junction_13532	J001	0.00773932	31.4488	2.04772e-08	1.03129e-06	14.3997	12.6501	-0.636846	chr2L	7220677	7220740	64	-	226	251	109	53	0.7584	0.7819	0.545	0.5048
ico	intronretention_Junction_13532	intronretentionright-Junction_13532	J002	0.00792875	31.1382	2.40292e-08	1.19246e-06	9.77241	12.1717	0.93928	chr2L	7220693	7220811	119	-	72	70	91	52	0.2416	0.2181	0.455	0.4952	-0.285036
Ssb-c31a	intronretention_Junction_14424	intronretentionleft-Junction_14424	J001	0.0618457	4.12255	0.0423153	0.177371	19.2544	17.7684	-0.509019	chr2L	8211502	8211557	56	+	819	618	255	357	0.7507	0.6554	0.4603	0.6051
Ssb-c31a	intronretention_Junction_14424	intronretentionleft-Junction_14424	J002	0.0619467	4.11613	0.0424763	0.177747	15.6553	17.1501	0.521094	chr2L	8211429	8211550	122	+	272	325	299	233	0.2493	0.3446	0.5397	0.3949
Ssb-c31a	intronretention_Junction_14424	intronretentionright-Junction_14424	J001	0.013021	14.3434	0.000152313	0.0023205	19.184	17.8363	-0.461603	chr2L	8211502	8211557	56	+	819	618	255	357	0.5817	0.623	0.4061	0.4679
Ssb-c31a	intronretention_Junction_14424	intronretentionright-Junction_14424	J002	0.0130294	14.3357	0.00015294	0.0023262	17.4781	18.8399	0.467573	chr2L	8211510	8211628	119	+	589	374	373	406	0.4183	0.377	0.5939	0.5321	-0.161617
Dh31	intronretention_Junction_14796	intronretentionleft-Junction_14796	J001	0.0331815	12.4857	0.000410077	0.00518794	19.6423	21.4692	0.619212	chr2L	8506706	8506791	86	-	250	436	641	2590	0.2572	0.3577	0.5441	0.5156
Dh31	intronretention_Junction_14796	intronretentionleft-Junction_14796	J002	0.0331757	12.4878	0.000409622	0.00518479	22.9288	21.1136	-0.612162	chr2L	8506633	8506754	122	-	722	783	537	2433	0.7428	0.6423	0.4559	0.4844
Dh31	intronretention_Junction_14796	intronretentionright-Junction_14796	J001	0.033997	24.9804	5.79148e-07	1.95315e-05	19.1855	21.9304	0.930532	chr2L	8506706	8506791	86	-	250	436	641	2590	0.2864	0.4048	0.674	0.6662
Dh31	intronretention_Junction_14796	intronretentionright-Junction_14796	J002	0.0340107	24.9709	5.82008e-07	1.96074e-05	21.7112	18.9623	-0.932765	chr2L	8506744	8506846	103	-	623	641	310	1298	0.7136	0.5952	0.326	0.3338	0.224688
SCAR	intronretention_Junction_1508	intronretentionleft-Junction_1508	J001	0.0281869	5.03041	0.024906	0.122774	5.42134	3.85177	-1.07774	chr2L	10978706	10978878	173	+	38	17	5	0	0.6333	0.6296	0.2941	INF
SCAR	intronretention_Junction_1508	intronretentionleft-Junction_1508	J002	0.0302901	4.94411	0.0261798	0.126978	4.24463	5.72914	0.958159	chr2L	10978659	10978754	96	+	22	10	12	0	0.3667	0.3704	0.7059	INF
SCAR	intronretention_Junction_1508	intronretentionright-Junction_1508	J001	0.0503558	13.1004	0.000295234	0.00397268	6.18813	3.3288	-1.95967	chr2L	10978706	10978878	173	+	38	17	5	0	0.6909	0.5667	0.1515	INF
SCAR	intronretention_Junction_1508	intronretentionright-Junction_1508	J002	0.0510647	13.016	0.000308837	0.00411702	4.75526	7.18598	1.37147	chr2L	10978831	10978926	96	+	17	13	28	0	0.3091	0.4333	0.8485	INF	-0.348142
FKBP59	intronretention_Junction_15823	intronretentionleft-Junction_15823	J001	0.0303149	7.31635	0.006833	0.047857	15.9831	14.5719	-0.498645	chr2L	9888787	9888845	59	+	314	220	211	140	0.7476	0.6875	0.6011	0.4965
FKBP59	intronretention_Junction_15823	intronretentionleft-Junction_15823	J002	0.0304769	7.28431	0.00695594	0.0485156	12.2117	13.7136	0.553393	chr2L	9888714	9888835	122	+	106	100	140	142	0.2524	0.3125	0.3989	0.5035
FKBP59	intronretention_Junction_15823	intronretentionright-Junction_15823	J001	0.0183441	89.428	3.1801e-21	1.29647e-18	17.356	13.2535	-1.45202	chr2L	9888787	9888845	59	+	314	220	211	140	0.8464	0.8209	0.4027	0.3271
FKBP59	intronretention_Junction_15823	intronretentionright-Junction_15823	J002	0.0183892	89.2659	3.45166e-21	1.38959e-18	10.9062	15.4312	1.66667	chr2L	9888798	9888915	118	+	57	48	313	288	0.1536	0.1791	0.5973	0.6729	-0.346361
Gpb5	intronretention_Junction_16016	intronretentionleft-Junction_16016	J001	0.00894505	212.383	4.14989e-48	1.02812e-44	13.8391	18.9046	1.77092	chr2LHet	167315	167374	60	+	88	45	1090	1258	0.2493	0.2446	0.787	0.8185
Gpb5	intronretention_Junction_16016	intronretentionleft-Junction_16016	J002	0.0089904	211.684	5.89359e-48	1.35582e-44	18.3944	13.1111	-1.86145	chr2LHet	167267	167363	97	+	265	139	295	279	0.7507	0.7554	0.213	0.1815
Gpb5	intronretention_Junction_16016	intronretentionright-Junction_16016	J001	0.0086759	79.5727	4.64806e-19	1.4534e-16	14.8747	17.8229	1.02905	chr2LHet	167315	167374	60	+	88	45	1090	1258	0.4944	0.4128	0.8233	0.808
Gpb5	intronretention_Junction_16016	intronretentionright-Junction_16016	J002	0.00880222	78.9906	6.24071e-19	1.87845e-16	15.4889	11.8413	-1.32683	chr2LHet	167327	167440	114	+	90	64	234	299	0.5056	0.5872	0.1767	0.192	0.489172
CG40042	intronretention_Junction_16021	intronretentionleft-Junction_16021	J001	0.00826206	9.23568	0.00237344	0.0211573	19.2201	18.3063	-0.312497	chr2LHet	168403	168461	59	-	386	309	752	679	0.6531	0.6776	0.5341	0.5808
CG40042	intronretention_Junction_16021	intronretentionleft-Junction_16021	J002	0.00827552	9.22457	0.00238788	0.0212616	16.3622	17.366	0.348283	chr2LHet	168331	168451	121	-	205	147	656	490	0.3469	0.3224	0.4659	0.4192
CG40042	intronretention_Junction_16021	intronretentionright-Junction_16021	J001	0.0162307	6.49703	0.0108055	0.0673332	19.2751	18.2503	-0.350436	chr2LHet	168403	168461	59	-	386	309	752	679	0.5857	0.6384	0.5222	0.4572
CG40042	intronretention_Junction_16021	intronretentionright-Junction_16021	J002	0.0162356	6.49536	0.0108156	0.0673899	17.4016	18.4459	0.359137	chr2LHet	168414	168534	121	-	273	175	688	806	0.4143	0.3616	0.4778	0.5428	-0.116941
CG12567	intronretention_Junction_16040	intronretentionleft-Junction_16040	J001	0.0280956	8.46795	0.00361459	0.0293718	16.1291	14.6186	-0.533051	chr2LHet	20650	20721	72	-	231	217	212	220	0.7752	0.7978	0.6795	0.5729
CG12567	intronretention_Junction_16040	intronretentionleft-Junction_16040	J002	0.0283555	8.40653	0.00373875	0.030179	10.9811	12.6815	0.645878	chr2LHet	20580	20698	119	-	67	55	100	164	0.2248	0.2022	0.3205	0.4271
CG12567	intronretention_Junction_16040	intronretentionright-Junction_16040	J001	0.0177471	18.3922	1.79794e-05	0.000386299	16.1648	14.5824	-0.558418	chr2LHet	20650	20721	72	-	231	217	212	220	0.9094	0.868	0.7544	0.7097
CG12567	intronretention_Junction_16040	intronretentionright-Junction_16040	J002	0.0185078	17.948	2.27019e-05	0.000471564	8.33238	10.718	0.99636	chr2LHet	20674	20774	101	-	23	33	69	90	0.0906	0.132	0.2456	0.2903	-0.205268
CG8331	intronretention_Junction_16165	intronretentionleft-Junction_16165	J001	0.0160702	9.79512	0.00174976	0.0165529	23.616	22.3764	-0.416978	chr2R	10060188	10060250	63	+	1728	1542	1171	1042	0.5314	0.5804	0.4458	0.3813
CG8331	intronretention_Junction_16165	intronretentionleft-Junction_16165	J002	0.0160697	9.79542	0.00174948	0.0165527	22.6657	23.9024	0.415755	chr2R	10060115	10060236	122	+	1524	1115	1456	1691	0.4686	0.4196	0.5542	0.6187
CG8331	intronretention_Junction_16165	intronretentionright-Junction_16165	J001	0.0115215	5.0355	0.0248329	0.122575	23.364	22.6279	-0.247611	chr2R	10060188	10060250	63	+	1728	1542	1171	1042	0.7155	0.7551	0.6808	0.6389
CG8331	intronretention_Junction_16165	intronretentionright-Junction_16165	J002	0.0115388	5.02874	0.02493	0.122837	19.014	19.8005	0.267986	chr2R	10060203	10060323	121	+	687	500	549	589	0.2845	0.2449	0.3192	0.3611	-0.12238
Trs31	intronretention_Junction_16664	intronretentionleft-Junction_16664	J001	0.0504846	4.85691	0.0275356	0.131794	16.4887	14.9487	-0.541072	chr2R	10644683	10644744	62	-	288	323	195	178	0.7721	0.8346	0.5945	0.7206
Trs31	intronretention_Junction_16664	intronretentionleft-Junction_16664	J002	0.0509438	4.81834	0.0281584	0.133613	10.8604	12.4845	0.619884	chr2R	10644613	10644731	119	-	85	64	133	69	0.2279	0.1654	0.4055	0.2794
Trs31	intronretention_Junction_16664	intronretentionright-Junction_16664	J001	0.0178861	5.16907	0.0229925	0.116124	16.2044	15.2252	-0.343987	chr2R	10644683	10644744	62	-	288	323	195	178	0.6682	0.7242	0.5493	0.6181
Trs31	intronretention_Junction_16664	intronretentionright-Junction_16664	J002	0.0179966	5.14473	0.0233171	0.117221	12.8189	13.9083	0.397702	chr2R	10644697	10644818	122	-	143	123	160	110	0.3318	0.2758	0.4507	0.3819	-0.146642
CG11807	intronretention_Junction_17064	intronretentionleft-Junction_17064	J001	0.0115623	8.36555	0.003824	0.0307055	12.4951	13.582	0.399643	chr2R	11091406	11091464	59	+	144	118	122	110	0.5017	0.57	0.6854	0.6707
CG11807	intronretention_Junction_17064	intronretentionleft-Junction_17064	J002	0.0116626	8.32626	0.0039076	0.0312754	12.0051	10.7271	-0.492541	chr2R	11091337	11091454	118	+	143	89	56	54	0.4983	0.43	0.3146	0.3293
CG11807	intronretention_Junction_17064	intronretentionright-Junction_17064	J001	0.0206401	4.88313	0.0271203	0.130309	12.5543	13.5201	0.355129	chr2R	11091406	11091464	59	+	144	118	122	110	0.5737	0.6277	0.6854	0.7692
CG11807	intronretention_Junction_17064	intronretentionright-Junction_17064	J002	0.020979	4.83444	0.0278967	0.132841	11.0459	9.8976	-0.457605	chr2R	11091417	11091536	120	+	107	70	56	33	0.4263	0.3723	0.3146	0.2308	0.144134
CG8079	intronretention_Junction_17081	intronretentionleft-Junction_17081	J001	0.0786552	4.41351	0.0356554	0.157072	4.59592	2.76415	-1.55234	chr2R	11109328	11109402	75	+	12	0	3	5	0.3243	INF	0.0698	0.1389
CG8079	intronretention_Junction_17081	intronretentionleft-Junction_17081	J002	0.0512328	5.27675	0.021612	0.110971	6.3486	7.41874	0.54011	chr2R	11109282	11109376	95	+	25	0	40	31	0.6757	INF	0.9302	0.8611
CG8079	intronretention_Junction_17081	intronretentionright-Junction_17081	J001	0.0566759	4.57146	0.0325089	0.147779	4.54835	2.8003	-1.48081	chr2R	11109328	11109402	75	+	12	0	3	5	0.3429	INF	0.1111	0.119
CG8079	intronretention_Junction_17081	intronretentionright-Junction_17081	J002	0.0384891	5.21724	0.0223641	0.113761	6.06925	7.06653	0.519845	chr2R	11109355	11109448	94	+	23	0	24	37	0.6571	INF	0.8889	0.881	-0.143365
sli	intronretention_Junction_17619	intronretentionleft-Junction_17619	J001	0.0901771	4.92493	0.0264719	0.128025	10.7969	12.5246	0.659743	chr2R	11767119	11767202	84	-	68	46	128	133	0.85	0.6571	0.9078	0.911
sli	intronretention_Junction_17619	intronretentionleft-Junction_17619	J002	0.0959071	4.70317	0.0301071	0.140215	7.0616	5.16777	-1.0445	chr2R	11767063	11767167	105	-	12	24	13	13	0.15	0.3429	0.0922	0.089
sli	intronretention_Junction_17619	intronretentionright-Junction_17619	J001	0.0262424	4.63447	0.0313357	0.144269	11.1332	12.1807	0.399777	chr2R	11767119	11767202	84	-	68	46	128	133	0.5862	0.5227	0.6564	0.7472
sli	intronretention_Junction_17619	intronretentionright-Junction_17619	J002	0.0267306	4.58411	0.0322697	0.147105	10.2896	9.09456	-0.493555	chr2R	11767155	11767275	121	-	48	42	67	45	0.4138	0.4773	0.3436	0.2528	0.184878
casp	intronretention_Junction_17768	intronretentionleft-Junction_17768	J001	0.0131988	10.9271	0.000947682	0.0101492	10.4729	8.99639	-0.608789	chr2R	11913572	11913638	67	-	0	60	74	93	INF	0.8219	0.5692	0.5813
casp	intronretention_Junction_17768	intronretentionleft-Junction_17768	J002	0.0138348	10.7603	0.00103701	0.0109022	5.68509	7.99735	1.17925	chr2R	11913503	11913620	118	-	0	13	56	67	INF	0.1781	0.4308	0.4188
casp	intronretention_Junction_17768	intronretentionright-Junction_17768	J001	0.0174782	20.3251	6.53387e-06	0.000162311	11.0833	8.46217	-1.08167	chr2R	11913572	11913638	67	-	0	60	74	93	INF	0.7229	0.3834	0.3345
casp	intronretention_Junction_17768	intronretentionright-Junction_17768	J002	0.0171783	20.4929	5.9854e-06	0.000150309	7.75215	10.5396	1.19067	chr2R	11913591	11913707	117	-	0	23	119	185	INF	0.2771	0.6166	0.6655	-0.341623
casp	intronretention_Junction_17771	intronretentionleft-Junction_17771	J001	0.0343368	3.85137	0.0497053	0.197527	13.4813	12.4123	-0.393911	chr2R	11914317	11914370	54	-	137	122	106	117	0.531	0.6667	0.4454	0.4625
casp	intronretention_Junction_17771	intronretentionleft-Junction_17771	J002	0.0343805	3.84764	0.0498162	0.197809	12.0452	13.1262	0.401843	chr2R	11914249	11914365	117	-	121	61	132	136	0.469	0.3333	0.5546	0.5375
casp	intronretention_Junction_17771	intronretentionright-Junction_17771	J001	0.0248755	19.1975	1.17865e-05	0.000269034	14.0649	11.85	-0.816725	chr2R	11914317	11914370	54	-	137	122	106	117	0.5547	0.6703	0.3262	0.3451
casp	intronretention_Junction_17771	intronretentionright-Junction_17771	J002	0.0248061	19.2374	1.15428e-05	0.00026422	12.3591	14.5276	0.790967	chr2R	11914323	11914441	119	-	110	60	219	222	0.4453	0.3297	0.6738	0.6549	-0.198038
Ext2	intronretention_Junction_17941	intronretentionleft-Junction_17941	J001	0.0100898	9.42531	0.00214011	0.0194379	14.2086	13.1899	-0.369344	chr2R	12034606	12034669	64	-	140	99	174	182	0.7292	0.7795	0.6327	0.5948
Ext2	intronretention_Junction_17941	intronretentionleft-Junction_17941	J002	0.0102909	9.34092	0.00224093	0.0201763	10.0316	11.4273	0.550559	chr2R	12034536	12034654	119	-	52	28	101	124	0.2708	0.2205	0.3673	0.4052
Ext2	intronretention_Junction_17941	intronretentionright-Junction_17941	J001	0.00541698	18.2596	1.9275e-05	0.000410439	14.3249	13.0797	-0.451504	chr2R	12034606	12034669	64	-	140	99	174	182	0.7071	0.7174	0.5321	0.5433
Ext2	intronretention_Junction_17941	intronretentionright-Junction_17941	J002	0.00547318	18.1923	1.99688e-05	0.000422705	10.8399	12.488	0.629247	chr2R	12034622	12034741	120	-	58	39	153	153	0.2929	0.2826	0.4679	0.4567	-0.176665
CG8963	intronretention_Junction_18964	intronretentionleft-Junction_18964	J001	0.0891821	8.46483	0.0036208	0.0294148	3.89097	6.37042	1.58166	chr2R	12906854	12906936	83	-	6	1	26	32	0.0779	0.0156	0.1677	0.2602
CG8963	intronretention_Junction_18964	intronretentionleft-Junction_18964	J002	0.0819425	8.86253	0.00291084	0.0248536	12.6756	10.6337	-0.780182	chr2R	12906789	12906902	114	-	71	63	129	91	0.9221	0.9844	0.8323	0.7398
CG8963	intronretention_Junction_18964	intronretentionright-Junction_18964	J001	0.15169	5.88256	0.0152916	0.0869366	3.98791	6.21494	1.42241	chr2R	12906854	12906936	83	-	6	1	26	32	0.3333	0.0455	0.5306	0.5517
CG8963	intronretention_Junction_18964	intronretentionright-Junction_18964	J002	0.147494	5.98363	0.0144393	0.0832893	7.95888	5.77467	-1.1101	chr2R	12906889	12906982	94	-	12	21	23	26	0.6667	0.9545	0.4694	0.4483	0.140826
CG9646	intronretention_Junction_19020	intronretentionleft-Junction_19020	J001	0.00837114	8.66667	0.00324082	0.0270179	18.3903	19.2107	0.280491	chr2R	12938160	12938220	61	+	177	170	1495	1408	0.7629	0.8134	0.8702	0.8575
CG9646	intronretention_Junction_19020	intronretentionleft-Junction_19020	J002	0.00854491	8.57679	0.00340475	0.028074	13.0278	11.7049	-0.494672	chr2R	12938097	12938208	112	+	55	39	223	234	0.2371	0.1866	0.1298	0.1425
CG9646	intronretention_Junction_19020	intronretentionright-Junction_19020	J001	0.00264988	9.09527	0.00256272	0.022502	18.4908	19.105	0.209988	chr2R	12938160	12938220	61	+	177	170	1495	1408	0.6436	0.6513	0.7261	0.7265
CG9646	intronretention_Junction_19020	intronretentionright-Junction_19020	J002	0.00266733	9.07426	0.00259232	0.0227001	15.9543	15.0448	-0.320361	chr2R	12938173	12938293	121	+	98	91	564	530	0.3564	0.3487	0.2739	0.2735	0.100174
CG5174	intronretention_Junction_20123	intronretentionleft-Junction_20123	J001	0.0610578	8.74293	0.00310804	0.0261648	9.76657	11.6877	0.758536	chr2R	14311512	14311630	119	+	39	35	107	133	0.4756	0.5	0.8295	0.6927
CG5174	intronretention_Junction_20123	intronretentionleft-Junction_20123	J002	0.0622019	8.62766	0.00331097	0.0274412	9.94304	7.92301	-0.871487	chr2R	14311441	14311560	120	+	43	35	22	59	0.5244	0.5	0.1705	0.3073
CG5174	intronretention_Junction_20123	intronretentionright-Junction_20123	J001	0.00784129	18.4329	1.75992e-05	0.000379905	9.81809	11.6237	0.712951	chr2R	14311512	14311630	119	+	39	35	107	133	0.2955	0.3241	0.5377	0.5076
CG5174	intronretention_Junction_20123	intronretentionright-Junction_20123	J002	0.00777862	18.4876	1.71016e-05	0.000370155	12.823	11.3163	-0.568184	chr2R	14311583	14311688	106	+	93	73	92	129	0.7045	0.6759	0.4623	0.4924	0.21544
CG43066	intronretention_Junction_20255	intronretentionleft-Junction_20255	J001	0.0134099	4.23314	0.039642	0.169368	14.3509	13.5648	-0.283572	chr2R	14408165	14408221	57	+	121	102	139	291	0.5654	0.4928	0.4017	0.447
CG43066	intronretention_Junction_20255	intronretentionleft-Junction_20255	J002	0.0133834	4.23848	0.0395175	0.169075	13.8992	14.6686	0.275955	chr2R	14408095	14408213	119	+	93	105	207	360	0.4346	0.5072	0.5983	0.553
CG43066	intronretention_Junction_20255	intronretentionright-Junction_20255	J001	0.0214461	9.06898	0.00259982	0.0227564	14.6383	13.2861	-0.487887	chr2R	14408165	14408221	57	+	121	102	139	291	0.6302	0.6071	0.3904	0.4826
CG43066	intronretention_Junction_20255	intronretentionright-Junction_20255	J002	0.0214459	9.06906	0.0025997	0.0227564	12.7108	14.0951	0.505057	chr2R	14408174	14408292	119	+	71	66	217	312	0.3698	0.3929	0.6096	0.5174	-0.124558
Phb2	intronretention_Junction_20508	intronretentionleft-Junction_20508	J001	0.123345	4.10079	0.0428632	0.178774	14.4117	12.3863	-0.739366	chr2R	14708788	14708993	206	+	211	179	130	58	0.3071	0.3442	0.2265	0.0872
Phb2	intronretention_Junction_20508	intronretentionleft-Junction_20508	J002	0.12284	4.11678	0.0424599	0.177702	17.4278	19.4892	0.706423	chr2R	14708717	14708836	120	+	476	341	444	607	0.6929	0.6558	0.7735	0.9128
Phb2	intronretention_Junction_20508	intronretentionright-Junction_20508	J001	0.0696015	19.7757	8.70818e-06	0.000207444	15.1437	11.6978	-1.2595	chr2R	14708788	14708993	206	+	211	179	130	58	0.5894	0.6109	0.2748	0.1436
Phb2	intronretention_Junction_20508	intronretentionright-Junction_20508	J002	0.0694201	19.8228	8.49637e-06	0.000203452	13.5155	16.9384	1.21194	chr2R	14708946	14709058	113	+	147	114	343	346	0.4106	0.3891	0.7252	0.8564	-0.168098
CG10737	intronretention_Junction_20760	intronretentionleft-Junction_20760	J001	0.021692	8.68969	0.00320016	0.0267499	7.86121	6.12733	-0.867956	chr2R	15062813	15063691	879	+	26	31	15	17	0.4906	0.5	0.2143	0.3208
CG10737	intronretention_Junction_20760	intronretentionleft-Junction_20760	J002	0.0206942	8.84664	0.00293628	0.0250281	7.91363	9.30343	0.610895	chr2R	15062765	15062861	97	+	27	31	55	36	0.5094	0.5	0.7857	0.6792
CG10737	intronretention_Junction_20760	intronretentionright-Junction_20760	J001	0.0168504	3.93463	0.0473015	0.191039	7.49512	6.44482	-0.525608	chr2R	15062813	15063691	879	+	26	31	15	17	0.5778	0.5636	0.4412	0.3617
CG10737	intronretention_Junction_20760	intronretentionright-Junction_20760	J002	0.0168234	3.93643	0.0472509	0.19087	6.67278	7.68831	0.498174	chr2R	15063644	15063740	97	+	19	24	19	30	0.4222	0.4364	0.5588	0.6383	-0.174109
cora	intronretention_Junction_20825	intronretentionleft-Junction_20825	J001	0.0595525	5.40862	0.0200376	0.105312	6.84981	4.9936	-1.04854	chr2R	15129900	15129987	88	+	50	33	7	3	0.4237	0.33	0.25	0.0857
cora	intronretention_Junction_20825	intronretentionleft-Junction_20825	J002	0.0567231	5.54538	0.0185295	0.0997627	8.36612	9.88989	0.64904	chr2R	15129855	15129948	94	+	68	67	21	32	0.5763	0.67	0.75	0.9143
cora	intronretention_Junction_20825	intronretentionright-Junction_20825	J001	0.065355	43.373	4.52388e-11	4.32989e-09	8.79692	3.73444	-2.86326	chr2R	15129900	15129987	88	+	50	33	7	3	0.5376	0.6875	0.0778	0.0337
cora	intronretention_Junction_20825	intronretentionright-Junction_20825	J002	0.0627631	44.4309	2.63491e-11	2.67705e-09	7.61136	11.8281	1.75644	chr2R	15129940	15130036	97	+	43	15	83	86	0.4624	0.3125	0.9222	0.9663	-0.25483
CalpA	intronretention_Junction_20981	intronretentionleft-Junction_20981	J001	0.0161506	13.9135	0.000191416	0.0027839	10.0162	11.4205	0.554213	chr2R	15315412	15315473	62	+	35	0	211	304	0.7	INF	0.9214	0.9157
CalpA	intronretention_Junction_20981	intronretentionleft-Junction_20981	J002	0.0198949	13.1921	0.000281132	0.00381721	7.26299	4.30603	-1.72099	chr2R	15315354	15315460	107	+	15	0	18	28	0.3	INF	0.0786	0.0843
CalpA	intronretention_Junction_20981	intronretentionright-Junction_20981	J001	0.00959569	9.96759	0.0015932	0.0153537	9.96794	11.4894	0.600311	chr2R	15315412	15315473	62	+	35	0	211	304	0.4605	INF	0.6941	0.6771
CalpA	intronretention_Junction_20981	intronretentionright-Junction_20981	J002	0.00988395	9.87194	0.00167818	0.016026	10.5295	8.74521	-0.739729	chr2R	15315426	15315544	119	+	41	0	93	145	0.5395	INF	0.3059	0.3229	0.261683
Fak	intronretention_Junction_20996	intronretentionleft-Junction_20996	J001	0.0104923	42.1016	8.66505e-11	7.81724e-09	13.6873	11.0831	-0.974748	chr2R	15319067	15319130	64	-	77	74	117	166	0.6754	0.7327	0.3451	0.3843
Fak	intronretention_Junction_20996	intronretentionleft-Junction_20996	J002	0.0104389	42.199	8.24439e-11	7.49019e-09	10.4017	13.1658	1.05312	chr2R	15319001	15319115	115	-	37	27	222	266	0.3246	0.2673	0.6549	0.6157
Fak	intronretention_Junction_20996	intronretentionright-Junction_20996	J001	0.0315614	5.94134	0.0147897	0.0848247	12.9545	11.7886	-0.435883	chr2R	15319067	15319130	64	-	77	74	117	166	0.8851	0.7789	0.661	0.7094
Fak	intronretention_Junction_20996	intronretentionright-Junction_20996	J002	0.0332199	5.77696	0.0162376	0.0907721	7.41241	8.92918	0.687246	chr2R	15319083	15319201	119	-	10	21	60	68	0.1149	0.2211	0.339	0.2906	-0.301146
CG17337	intronretention_Junction_21345	intronretentionleft-Junction_21345	J001	0.0240428	9.76531	0.00177835	0.0167493	15.5317	14.0205	-0.537859	chr2R	1587493	1587546	54	+	182	185	144	246	0.5353	0.6424	0.383	0.4162
CG17337	intronretention_Junction_21345	intronretentionleft-Junction_21345	J002	0.0240286	9.76993	0.00177389	0.0167242	14.097	15.6041	0.535825	chr2R	1587420	1587541	122	+	158	103	232	345	0.4647	0.3576	0.617	0.5838
CG17337	intronretention_Junction_21345	intronretentionright-Junction_21345	J001	0.0215843	19.287	1.12467e-05	0.000258823	15.8063	13.7524	-0.731245	chr2R	1587493	1587546	54	+	182	185	144	246	0.5652	0.6607	0.3404	0.3814
CG17337	intronretention_Junction_21345	intronretentionright-Junction_21345	J002	0.0215573	19.3061	1.1135e-05	0.000256739	13.951	15.9901	0.723844	chr2R	1587499	1587619	121	+	140	95	279	399	0.4348	0.3393	0.6596	0.6186	-0.196932
capt	intronretention_Junction_2166	intronretentionleft-Junction_2166	J001	0.0141238	5.11175	0.0237643	0.118917	19.7938	18.9774	-0.278188	chr2L	1152115	1152175	61	-	657	550	559	545	0.7509	0.7835	0.6561	0.7106
capt	intronretention_Junction_2166	intronretentionleft-Junction_2166	J002	0.0141959	5.09061	0.0240557	0.119916	14.8473	15.7827	0.330291	chr2L	1152043	1152163	121	-	218	152	293	222	0.2491	0.2165	0.3439	0.2894
capt	intronretention_Junction_2166	intronretentionright-Junction_2166	J001	0.0025957	23.389	1.32333e-06	4.07267e-05	19.8561	18.916	-0.320331	chr2L	1152115	1152175	61	-	657	550	559	545	0.5882	0.5933	0.4674	0.4875
capt	intronretention_Junction_2166	intronretentionright-Junction_2166	J002	0.00259754	23.3793	1.33001e-06	4.08682e-05	18.3075	19.3007	0.339535	chr2L	1152128	1152249	122	-	460	377	637	573	0.4118	0.4067	0.5326	0.5125	-0.109865
CG30152	intronretention_Junction_21892	intronretentionleft-Junction_21892	J001	0.0328186	4.65404	0.0309805	0.143155	17.4261	16.3439	-0.375413	chr2R	16559363	16559622	260	+	401	301	354	228	0.802	0.8455	0.7597	0.6686
CG30152	intronretention_Junction_21892	intronretentionleft-Junction_21892	J002	0.0331634	4.61531	0.0316877	0.145339	11.3276	12.5426	0.459828	chr2R	16559297	16559411	115	+	99	55	112	113	0.198	0.1545	0.2403	0.3314
CG30152	intronretention_Junction_21892	intronretentionright-Junction_21892	J001	0.0464262	11.1317	0.000848633	0.00928867	17.9132	15.8628	-0.711462	chr2R	16559363	16559622	260	+	401	301	354	228	0.802	0.8827	0.6344	0.6514
CG30152	intronretention_Junction_21892	intronretentionright-Junction_21892	J002	0.0468618	11.0437	0.000889881	0.00962889	11.3468	13.5154	0.810216	chr2R	16559575	16559692	118	+	99	40	204	122	0.198	0.1173	0.3656	0.3486	-0.204376
Glycogenin	intronretention_Junction_22346	intronretentionleft-Junction_22346	J001	0.074139	7.9611	0.00477933	0.0364757	9.11588	7.16699	-0.886195	chr2R	17093046	17093249	204	+	23	28	13	62	0.5	0.4828	0.1354	0.278
Glycogenin	intronretention_Junction_22346	intronretentionleft-Junction_22346	J002	0.0725059	8.07849	0.00447938	0.0347596	9.25269	11.1093	0.750047	chr2R	17092975	17093094	120	+	23	30	83	161	0.5	0.5172	0.8646	0.722
Glycogenin	intronretention_Junction_22346	intronretentionright-Junction_22346	J001	0.0827487	6.8966	0.008636	0.0570011	9.05743	7.22001	-0.835335	chr2R	17093046	17093249	204	+	23	28	13	62	0.6053	0.6667	0.2203	0.4106
Glycogenin	intronretention_Junction_22346	intronretentionright-Junction_22346	J002	0.0819582	6.93859	0.00843556	0.0560578	7.24158	9.06595	0.828448	chr2R	17093202	17093312	111	+	15	14	46	89	0.3947	0.3333	0.7797	0.5894	-0.237835
dpr12	intronretention_Junction_22733	intronretentionleft-Junction_22733	J001	0.00953798	4.47538	0.0343866	0.153212	15.7641	16.2882	0.183418	chr2R	1746063	1746127	65	+	217	193	461	196	0.8543	0.8465	0.9111	0.8869
dpr12	intronretention_Junction_22733	intronretentionleft-Junction_22733	J002	0.0102589	4.33817	0.0372669	0.162317	9.12345	7.92647	-0.528812	chr2R	1746007	1746111	105	+	37	35	45	25	0.1457	0.1535	0.0889	0.1131
dpr12	intronretention_Junction_22733	intronretentionright-Junction_22733	J001	0.00493073	18.4707	1.72541e-05	0.000372955	15.5411	16.5185	0.342093	chr2R	1746063	1746127	65	+	217	193	461	196	0.6824	0.6796	0.8102	0.8099
dpr12	intronretention_Junction_22733	intronretentionright-Junction_22733	J002	0.00504282	18.3064	1.88076e-05	0.000400884	12.5082	10.8035	-0.65105	chr2R	1746080	1746197	118	+	101	91	108	46	0.3176	0.3204	0.1898	0.1901	0.134307
PIP5K59B	intronretention_Junction_23603	intronretentionleft-Junction_23603	J001	0.00459625	21.9477	2.80179e-06	7.71918e-05	13.9794	12.3853	-0.584451	chr2R	18767565	18767654	90	+	252	190	88	60	0.4755	0.4589	0.2983	0.3061
PIP5K59B	intronretention_Junction_23603	intronretentionleft-Junction_23603	J002	0.00457022	21.9995	2.72721e-06	7.54788e-05	14.4957	15.7419	0.441295	chr2R	18767498	18767613	116	+	278	224	207	136	0.5245	0.5411	0.7017	0.6939
PIP5K59B	intronretention_Junction_23603	intronretentionright-Junction_23603	J001	0.037503	5.12767	0.0235473	0.118058	13.8012	12.5419	-0.4617	chr2R	18767565	18767654	90	+	252	190	88	60	0.759	0.7851	0.6929	0.5405
PIP5K59B	intronretention_Junction_23603	intronretentionright-Junction_23603	J002	0.0382434	5.05537	0.0245498	0.121642	9.2716	10.6893	0.577596	chr2R	18767607	18767706	100	+	80	52	39	51	0.241	0.2149	0.3071	0.4595	-0.157226
CG3530	intronretention_Junction_23896	intronretentionleft-Junction_23896	J001	0.0327095	14.4108	0.000146954	0.00225526	22.3624	20.3315	-0.686372	chr2R	19277181	19277240	60	-	2052	2353	544	216	0.6502	0.7242	0.4928	0.4
CG3530	intronretention_Junction_23896	intronretentionleft-Junction_23896	J002	0.0327331	14.401	0.00014772	0.0022623	18.947	20.9934	0.695426	chr2R	19277111	19277229	119	-	1104	896	560	324	0.3498	0.2758	0.5072	0.6
CG3530	intronretention_Junction_23896	intronretentionright-Junction_23896	J001	0.0531607	10.6096	0.00112499	0.0116298	22.4358	20.2575	-0.736193	chr2R	19277181	19277240	60	-	2052	2353	544	216	0.6105	0.6803	0.453	0.3108
CG3530	intronretention_Junction_23896	intronretentionright-Junction_23896	J002	0.053169	10.608	0.00112597	0.0116361	19.8238	22.0038	0.737909	chr2R	19277193	19277314	122	-	1309	1106	657	479	0.3895	0.3197	0.547	0.6892	-0.239493
CG17683	intronretention_Junction_24014	intronretentionleft-Junction_24014	J001	0.015114	4.02536	0.0448212	0.184174	10.6945	9.85878	-0.335721	chr2R	19484	19540	57	+	107	0	62	73	0.7643	INF	0.6327	0.6239
CG17683	intronretention_Junction_24014	intronretentionleft-Junction_24014	J002	0.0162259	3.89519	0.0484247	0.194091	6.88229	8.10225	0.582517	chr2R	19413	19532	120	+	33	0	36	44	0.2357	INF	0.3673	0.3761
CG17683	intronretention_Junction_24014	intronretentionright-Junction_24014	J001	0.0178436	4.65534	0.0309572	0.143108	10.7888	9.75838	-0.41408	chr2R	19484	19540	57	+	107	0	62	73	0.7181	INF	0.5849	0.5368
CG17683	intronretention_Junction_24014	intronretentionright-Junction_24014	J002	0.0185589	4.55597	0.0328042	0.148702	7.66893	8.964	0.580425	chr2R	19493	19609	117	+	42	0	44	63	0.2819	INF	0.4151	0.4632	-0.166824
St3	intronretention_Junction_24098	intronretentionleft-Junction_24098	J001	0.0138794	17.0585	3.62459e-05	0.000704934	12.2714	10.556	-0.660325	chr2R	19574400	19574554	155	+	99	90	70	67	0.6781	0.7143	0.4965	0.4214
St3	intronretention_Junction_24098	intronretentionleft-Junction_24098	J002	0.0140439	16.9606	3.81645e-05	0.000737351	9.25727	11.2041	0.784867	chr2R	19574330	19574448	119	+	47	36	71	92	0.3219	0.2857	0.5035	0.5786
St3	intronretention_Junction_24098	intronretentionright-Junction_24098	J001	0.0070967	66.3522	3.77146e-16	8.46463e-14	13.1115	9.78296	-1.28378	chr2R	19574400	19574554	155	+	99	90	70	67	0.5323	0.5143	0.1847	0.2107
St3	intronretention_Junction_24098	intronretentionright-Junction_24098	J002	0.00696175	66.8999	2.85649e-16	6.64253e-14	12.7463	15.1832	0.879944	chr2R	19574507	19574616	110	+	87	85	309	251	0.4677	0.4857	0.8153	0.7893	-0.266231
CG5554	intronretention_Junction_24234	intronretentionleft-Junction_24234	J001	0.0114167	4.4677	0.0345415	0.153721	16.1145	15.3187	-0.279553	chr2R	19732854	19733056	203	+	142	130	447	398	0.5318	0.5936	0.4435	0.4877
CG5554	intronretention_Junction_24234	intronretentionleft-Junction_24234	J002	0.011412	4.46894	0.0345163	0.153656	15.1092	15.9137	0.283339	chr2R	19732784	19732902	119	+	125	89	561	418	0.4682	0.4064	0.5565	0.5123
CG5554	intronretention_Junction_24234	intronretentionright-Junction_24234	J001	0.018966	10.756	0.00103942	0.0109186	16.4667	14.9723	-0.525012	chr2R	19732854	19733056	203	+	142	130	447	398	0.5145	0.6103	0.3622	0.4041
CG5554	intronretention_Junction_24234	intronretentionright-Junction_24234	J002	0.0189295	10.7721	0.00103041	0.0108488	15.4955	16.9645	0.513038	chr2R	19733009	19733127	119	+	134	83	787	587	0.4855	0.3897	0.6378	0.5959	-0.125938
kcc	intronretention_Junction_24368	intronretentionleft-Junction_24368	J001	0.0198964	6.8249	0.00898957	0.0587137	20.2638	19.2628	-0.340446	chr2R	19809850	19809913	64	+	1009	825	641	238	0.8277	0.8041	0.7497	0.6723
kcc	intronretention_Junction_24368	intronretentionleft-Junction_24368	J002	0.0200172	6.79166	0.00915848	0.0594572	14.0694	15.2024	0.404093	chr2R	19809778	19809898	121	+	210	201	214	116	0.1723	0.1959	0.2503	0.3277
kcc	intronretention_Junction_24368	intronretentionright-Junction_24368	J001	0.00800924	8.77813	0.00304864	0.0257913	20.1406	19.3922	-0.254532	chr2R	19809850	19809913	64	+	1009	825	641	238	0.8631	0.8871	0.8114	0.8095
kcc	intronretention_Junction_24368	intronretentionright-Junction_24368	J002	0.00815188	8.68809	0.00320297	0.026763	12.1973	13.4063	0.447042	chr2R	19809866	19809982	117	+	160	105	149	56	0.1369	0.1129	0.1886	0.1905	-0.121099
Tal	intronretention_Junction_24415	intronretentionleft-Junction_24415	J001	0.00933241	5.51074	0.0189	0.101132	13.2266	12.4927	-0.27093	chr2R	19828703	19828761	59	+	163	197	88	65	0.7799	0.7817	0.704	0.6436
Tal	intronretention_Junction_24415	intronretentionleft-Junction_24415	J002	0.00976688	5.42263	0.0198774	0.104772	8.5735	9.75787	0.503067	chr2R	19828631	19828751	121	+	46	55	37	36	0.2201	0.2183	0.296	0.3564
Tal	intronretention_Junction_24415	intronretentionright-Junction_24415	J001	0.0161437	8.40003	0.00375215	0.0302605	13.3954	12.3314	-0.392809	chr2R	19828703	19828761	59	+	163	197	88	65	0.8232	0.8277	0.7333	0.6373
Tal	intronretention_Junction_24415	intronretentionright-Junction_24415	J002	0.0170694	8.18394	0.00422628	0.0332233	7.7988	9.42171	0.713695	chr2R	19828714	19828833	120	+	35	41	32	37	0.1768	0.1723	0.2667	0.3627	-0.154432
Galphas	intronretention_Junction_24425	intronretentionleft-Junction_24425	J001	0.0391686	3.93068	0.0474128	0.191356	15.1142	13.7739	-0.479544	chr2R	19832426	19832481	56	+	118	165	163	262	0.6211	0.7333	0.578	0.4943
Galphas	intronretention_Junction_24425	intronretentionleft-Junction_24425	J002	0.0392893	3.92038	0.0477041	0.192121	12.0286	13.4167	0.514344	chr2R	19832357	19832474	118	+	72	60	119	268	0.3789	0.2667	0.422	0.5057
Galphas	intronretention_Junction_24425	intronretentionright-Junction_24425	J001	0.0543998	4.17809	0.0409498	0.17341	15.207	13.6868	-0.543948	chr2R	19832426	19832481	56	+	118	165	163	262	0.377	0.5537	0.3052	0.2921
Galphas	intronretention_Junction_24425	intronretentionright-Junction_24425	J002	0.05424	4.18941	0.0406772	0.172539	15.7138	17.2127	0.522192	chr2R	19832434	19832554	121	+	195	133	371	635	0.623	0.4463	0.6948	0.7079	-0.146439
gek	intronretention_Junction_24784	intronretentionleft-Junction_24784	J001	0.00987124	15.4843	8.31953e-05	0.00140286	13.6278	12.2456	-0.509563	chr2R	19979785	19979863	79	-	229	130	88	74	0.7411	0.6878	0.5269	0.5324
gek	intronretention_Junction_24784	intronretentionleft-Junction_24784	J002	0.0100558	15.3457	8.95247e-05	0.00149356	10.0621	11.795	0.678702	chr2R	19979714	19979833	120	-	80	59	79	65	0.2589	0.3122	0.4731	0.4676
gek	intronretention_Junction_24784	intronretentionright-Junction_24784	J001	0.00530762	8.13132	0.0043507	0.0339939	13.4233	12.4544	-0.357075	chr2R	19979785	19979863	79	-	229	130	88	74	0.4693	0.4943	0.3651	0.3719
gek	intronretention_Junction_24784	intronretentionright-Junction_24784	J002	0.00528276	8.1467	0.00431395	0.0337601	13.7643	14.5925	0.29759	chr2R	19979816	19979935	120	-	259	133	153	125	0.5307	0.5057	0.6349	0.6281	-0.125796
gek	intronretention_Junction_24786	intronretentionleft-Junction_24786	J001	0.0128676	18.5691	1.63859e-05	0.000356582	16.8461	15.4626	-0.483576	chr2R	19980061	19980126	66	-	466	242	245	164	0.8962	0.8551	0.738	0.7421
gek	intronretention_Junction_24786	intronretentionleft-Junction_24786	J002	0.0133437	18.1799	2.00986e-05	0.000424766	9.14281	11.352	0.890498	chr2R	19979999	19980109	111	-	54	41	87	57	0.1038	0.1449	0.262	0.2579
gek	intronretention_Junction_24786	intronretentionright-Junction_24786	J001	0.00903596	4.51716	0.0335565	0.150849	16.4394	15.8709	-0.198648	chr2R	19980061	19980126	66	-	466	242	245	164	0.8442	0.8288	0.7929	0.7489
gek	intronretention_Junction_24786	intronretentionright-Junction_24786	J002	0.00936464	4.4402	0.0351022	0.155382	10.0324	11.0186	0.392095	chr2R	19980079	19980199	121	-	86	50	64	55	0.1558	0.1712	0.2071	0.2511	-0.141407
Dat	intronretention_Junction_24856	intronretentionleft-Junction_24856	J001	0.00675407	6.43903	0.011164	0.0689832	12.5796	13.3867	0.297112	chr2R	20044572	20044635	64	+	228	213	89	45	0.6423	0.6265	0.7542	0.75
Dat	intronretention_Junction_24856	intronretentionleft-Junction_24856	J002	0.00688555	6.4023	0.0113972	0.0700329	10.507	9.25473	-0.512468	chr2R	20044502	20044620	119	+	127	127	29	15	0.3577	0.3735	0.2458	0.25
Dat	intronretention_Junction_24856	intronretentionright-Junction_24856	J001	0.00648443	6.48696	0.0108668	0.067611	12.5213	13.4463	0.340528	chr2R	20044572	20044635	64	+	228	213	89	45	0.4326	0.462	0.5705	0.5556
Dat	intronretention_Junction_24856	intronretentionright-Junction_24856	J002	0.00646902	6.49311	0.0108293	0.0674559	13.354	12.419	-0.344997	chr2R	20044588	20044708	121	+	299	248	67	36	0.5674	0.538	0.4295	0.4444	0.119481
NaCP60E	intronretention_Junction_25593	intronretentionleft-Junction_25593	J001	0.00817164	33.7636	6.22332e-09	3.57427e-07	11.5809	9.10476	-0.994553	chr2R	20804413	20804841	429	+	146	124	24	29	0.6213	0.6458	0.3243	0.3053
NaCP60E	intronretention_Junction_25593	intronretentionleft-Junction_25593	J002	0.00823669	33.6765	6.50819e-09	3.72308e-07	9.60529	11.9406	0.921138	chr2R	20804354	20804461	108	+	89	68	50	66	0.3787	0.3542	0.6757	0.6947
NaCP60E	intronretention_Junction_25593	intronretentionright-Junction_25593	J001	0.0118948	25.9753	3.45818e-07	1.25003e-05	11.4876	9.18952	-0.922791	chr2R	20804413	20804841	429	+	146	124	24	29	0.6667	0.6596	0.4138	0.3118
NaCP60E	intronretention_Junction_25593	intronretentionright-Junction_25593	J002	0.0120933	25.7996	3.78776e-07	1.35322e-05	9.05996	11.4039	0.945776	chr2R	20804794	20804900	107	+	73	64	34	64	0.3333	0.3404	0.5862	0.6882	-0.276894
NaCP60E	intronretention_Junction_25598	intronretentionleft-Junction_25598	J001	0.0185972	5.39394	0.0202068	0.105907	7.17961	5.7425	-0.75921	chr2R	20805100	20805169	70	+	56	41	0	13	0.6087	0.6212	INF	0.3611
NaCP60E	intronretention_Junction_25598	intronretentionleft-Junction_25598	J002	0.0193167	5.33456	0.0209066	0.108411	5.90074	7.31692	0.736169	chr2R	20805032	20805148	117	+	36	25	0	23	0.3913	0.3788	INF	0.6389
NaCP60E	intronretention_Junction_25598	intronretentionright-Junction_25598	J001	0.028756	5.19095	0.0227047	0.114931	7.30003	5.64265	-0.875584	chr2R	20805100	20805169	70	+	56	41	0	13	0.5385	0.4556	INF	0.26
NaCP60E	intronretention_Junction_25598	intronretentionright-Junction_25598	J002	0.0282058	5.23624	0.022121	0.112794	7.32152	8.69788	0.630828	chr2R	20805122	20805238	117	+	48	49	0	37	0.4615	0.5444	INF	0.74	-0.200179
Nplp1	intronretention_Junction_25767	intronretentionleft-Junction_25767	J001	0.0176575	24.8519	6.19091e-07	2.06837e-05	17.2742	15.0732	-0.769369	chr2R	20924235	20924370	136	+	159	185	416	409	0.6737	0.74	0.4787	0.4208
Nplp1	intronretention_Junction_25767	intronretentionleft-Junction_25767	J002	0.0176611	24.8481	6.20316e-07	2.07031e-05	13.6224	15.9385	0.824695	chr2R	20924170	20924283	114	+	77	65	453	563	0.3263	0.26	0.5213	0.5792
Nplp1	intronretention_Junction_25767	intronretentionright-Junction_25767	J001	0.00429116	32.8594	9.90723e-09	5.44045e-07	16.9313	15.3933	-0.537558	chr2R	20924235	20924370	136	+	159	185	416	409	0.636	0.6777	0.4648	0.4653
Nplp1	intronretention_Junction_25767	intronretentionright-Junction_25767	J002	0.00429408	32.8491	9.95962e-09	5.46456e-07	14.2403	15.9682	0.61209	chr2R	20924323	20924442	120	+	91	88	479	470	0.364	0.3223	0.5352	0.5347	-0.220668
IA-2	intronretention_Junction_258	intronretentionleft-Junction_258	J001	0.00947506	19.978	7.83389e-06	0.000189846	20.9155	19.5493	-0.463687	chr2L	1016076	1016137	62	-	1079	886	594	421	0.7127	0.7547	0.5695	0.5946
IA-2	intronretention_Junction_258	intronretentionleft-Junction_258	J002	0.00950112	19.9334	8.0189e-06	0.000193892	16.6758	18.1887	0.522345	chr2L	1016006	1016124	119	-	435	288	449	287	0.2873	0.2453	0.4305	0.4054
IA-2	intronretention_Junction_258	intronretentionright-Junction_258	J001	0.0130115	8.83439	0.00295607	0.0251568	20.7536	19.7096	-0.354297	chr2L	1016076	1016137	62	-	1079	886	594	421	0.577	0.6448	0.4877	0.4828
IA-2	intronretention_Junction_258	intronretentionright-Junction_258	J002	0.0130191	8.82988	0.00296338	0.0252024	18.892	19.9542	0.361879	chr2L	1016090	1016211	122	-	791	488	624	451	0.423	0.3552	0.5123	0.5172	-0.140816
Tsp42Ee	intronretention_Junction_26507	intronretentionleft-Junction_26507	J001	0.00352185	43.4798	4.2835e-11	4.11817e-09	21.6392	20.3518	-0.435597	chr2R	2905131	2905193	63	+	585	616	1029	1316	0.7708	0.7847	0.6203	0.6407
Tsp42Ee	intronretention_Junction_26507	intronretentionleft-Junction_26507	J002	0.00353391	43.3904	4.48373e-11	4.29784e-09	16.3389	18.0673	0.597954	chr2R	2905064	2905179	116	+	174	169	630	738	0.2292	0.2153	0.3797	0.3593
Tsp42Ee	intronretention_Junction_26507	intronretentionright-Junction_26507	J001	0.00375381	10.1419	0.00144933	0.014253	21.3109	20.6795	-0.21363	chr2R	2905131	2905193	63	+	585	616	1029	1316	0.7267	0.7171	0.6348	0.66
Tsp42Ee	intronretention_Junction_26507	intronretentionright-Junction_26507	J002	0.00376503	10.1227	0.00146458	0.01437	17.2769	18.0774	0.27579	chr2R	2905146	2905262	117	+	220	243	592	678	0.2733	0.2829	0.3652	0.34	-0.128971
rnh1	intronretention_Junction_27724	intronretentionleft-Junction_27724	J001	0.0449201	4.25348	0.03917	0.168016	12.9936	11.5905	-0.52573	chr2R	3819351	3819402	52	-	88	95	137	88	0.7213	0.7851	0.5331	0.6667
rnh1	intronretention_Junction_27724	intronretentionleft-Junction_27724	J002	0.0455326	4.2088	0.0402147	0.171107	8.87518	10.4025	0.632823	chr2R	3819293	3819399	107	-	34	26	120	44	0.2787	0.2149	0.4669	0.3333
rnh1	intronretention_Junction_27724	intronretentionright-Junction_27724	J001	0.00909936	25.1835	5.21261e-07	1.78219e-05	13.1166	11.4679	-0.617905	chr2R	3819351	3819402	52	-	88	95	137	88	0.8381	0.7917	0.5685	0.5789
rnh1	intronretention_Junction_27724	intronretentionright-Junction_27724	J002	0.00939345	24.9049	6.02295e-07	2.01749e-05	7.85253	10.3913	1.08493	chr2R	3819355	3819456	102	-	17	25	104	64	0.1619	0.2083	0.4315	0.4211	-0.227649
CG18659	intronretention_Junction_29262	intronretentionleft-Junction_29262	J001	0.0307315	11.5669	0.000671377	0.0076923	6.09365	3.84095	-1.47189	chr2R	5011650	5012247	598	-	14	21	3	7	0.5385	0.5	0.1111	0.2333
CG18659	intronretention_Junction_29262	intronretentionleft-Junction_29262	J002	0.0280074	11.8613	0.000573116	0.00678367	5.94317	7.58773	0.841907	chr2R	5011606	5011698	93	-	12	21	24	23	0.4615	0.5	0.8889	0.7667
CG18659	intronretention_Junction_29262	intronretentionright-Junction_29262	J001	0.0839415	4.60264	0.0319227	0.146032	5.74777	4.10386	-1.07359	chr2R	5011650	5012247	598	-	14	21	3	7	0.3784	0.6176	0.2	0.2258
CG18659	intronretention_Junction_29262	intronretentionright-Junction_29262	J002	0.0805487	4.69702	0.030215	0.140535	5.76486	7.22411	0.768155	chr2R	5012200	5012303	104	-	23	13	12	24	0.6216	0.3824	0.8	0.7742	-0.23049
Cyp4p1	intronretention_Junction_29440	intronretentionleft-Junction_29440	J001	0.022712	6.96393	0.00831691	0.0554122	8.42461	9.98744	0.662781	chr2R	5128347	5128412	66	+	37	37	27	74	0.25	0.2913	0.375	0.4901
Cyp4p1	intronretention_Junction_29440	intronretentionleft-Junction_29440	J002	0.0221027	7.08187	0.00778676	0.0529093	11.9635	10.6574	-0.50432	chr2R	5128281	5128395	115	+	111	90	45	77	0.75	0.7087	0.625	0.5099
Cyp4p1	intronretention_Junction_29440	intronretentionright-Junction_29440	J001	0.022892	11.7858	0.000596841	0.00700144	8.33672	10.084	0.741158	chr2R	5128347	5128412	66	+	37	37	27	74	0.3426	0.3304	0.6923	0.5401
Cyp4p1	intronretention_Junction_29440	intronretentionright-Junction_29440	J002	0.0225072	11.8746	0.00056905	0.0067467	10.6906	9.05644	-0.669395	chr2R	5128365	5128470	106	+	71	75	12	63	0.6574	0.6696	0.3077	0.4599	0.157552
CG33774	intronretention_Junction_29601	intronretentionleft-Junction_29601	J001	0.0199741	10.6284	0.00111362	0.0115297	21.0241	19.6143	-0.478312	chr2R	5287373	5287451	79	-	509	502	869	1157	0.705	0.7832	0.5892	0.5976
CG33774	intronretention_Junction_29601	intronretentionleft-Junction_29601	J002	0.0200062	10.6135	0.00112267	0.0116113	16.5246	18.0069	0.512514	chr2R	5287300	5287421	122	-	213	139	606	779	0.295	0.2168	0.4108	0.4024
CG33774	intronretention_Junction_29601	intronretentionright-Junction_29601	J001	0.0580174	15.0243	0.000106138	0.00172255	21.7224	18.9241	-0.949583	chr2R	5287373	5287451	79	-	509	502	869	1157	0.7574	0.8581	0.4817	0.5608
CG33774	intronretention_Junction_29601	intronretentionright-Junction_29601	J002	0.0580593	15.014	0.000106716	0.00172974	15.6839	18.5017	0.976218	chr2R	5287404	5287524	121	-	163	83	935	906	0.2426	0.1419	0.5183	0.4392	-0.250411
Pdk	intronretention_Junction_29636	intronretentionleft-Junction_29636	J001	0.0700382	6.18311	0.0128975	0.0766539	13.924	12.1739	-0.643677	chr2R	5319930	5319993	64	+	160	217	127	34	0.6867	0.792	0.5826	0.4198
Pdk	intronretention_Junction_29636	intronretentionleft-Junction_29636	J002	0.0706755	6.13812	0.0132298	0.0780791	9.82266	11.6113	0.706348	chr2R	5319858	5319978	121	+	73	57	91	47	0.3133	0.208	0.4174	0.5802
Pdk	intronretention_Junction_29636	intronretentionright-Junction_29636	J001	0.0232982	5.97462	0.0145132	0.0835743	13.6152	12.4773	-0.418336	chr2R	5319930	5319993	64	+	160	217	127	34	0.5096	0.5622	0.4276	0.3208
Pdk	intronretention_Junction_29636	intronretentionright-Junction_29636	J002	0.0232885	5.97625	0.0144998	0.0835335	12.9789	14.0935	0.405479	chr2R	5319946	5320063	118	+	154	169	170	72	0.4904	0.4378	0.5724	0.6792	-0.176868
CG1814	intronretention_Junction_29792	intronretentionleft-Junction_29792	J001	0.0136637	4.50843	0.0337281	0.151282	10.5405	11.482	0.367271	chr2R	5467341	5467466	126	+	64	51	137	47	0.5203	0.4766	0.6555	0.5802
CG1814	intronretention_Junction_29792	intronretentionleft-Junction_29792	J002	0.0138352	4.47907	0.0343123	0.15298	10.551	9.49839	-0.427754	chr2R	5467269	5467389	121	+	59	56	72	34	0.4797	0.5234	0.3445	0.4198
CG1814	intronretention_Junction_29792	intronretentionright-Junction_29792	J001	0.0148371	16.9621	3.81341e-05	0.000736984	10.1276	11.9148	0.697595	chr2R	5467341	5467466	126	+	64	51	137	47	0.4129	0.3643	0.6089	0.6912
CG1814	intronretention_Junction_29792	intronretentionright-Junction_29792	J002	0.0148362	16.9626	3.81241e-05	0.000736984	11.7952	9.98556	-0.709866	chr2R	5467419	5467538	120	+	91	89	88	21	0.5871	0.6357	0.3911	0.3088	0.181397
Updo	intronretention_Junction_29806	intronretentionleft-Junction_29806	J001	0.0811513	9.23062	0.00238001	0.02121	10.9614	8.45569	-1.037	chr2R	5472306	5472431	126	+	58	63	46	36	0.7945	0.8289	0.3932	0.6207
Updo	intronretention_Junction_29806	intronretentionleft-Junction_29806	J002	0.0826683	9.09979	0.00255639	0.0224615	6.22343	8.84015	1.25312	chr2R	5472251	5472354	104	+	15	13	71	22	0.2055	0.1711	0.6068	0.3793
Updo	intronretention_Junction_29806	intronretentionright-Junction_29806	J001	0.0391783	4.98966	0.0254992	0.124711	10.4152	8.94757	-0.606722	chr2R	5472306	5472431	126	+	58	63	46	36	0.58	0.5943	0.3262	0.4865
Updo	intronretention_Junction_29806	intronretentionright-Junction_29806	J002	0.0391295	4.99416	0.025433	0.12447	9.1683	10.6203	0.593997	chr2R	5472384	5472496	113	+	42	43	95	38	0.42	0.4057	0.6738	0.5135	-0.220889
CG1513	intronretention_Junction_30057	intronretentionleft-Junction_30057	J001	0.0112102	9.39584	0.00217479	0.0196889	16.1454	15.0962	-0.368994	chr2R	5771507	5771588	82	-	270	273	226	177	0.675	0.7339	0.5855	0.5619
CG1513	intronretention_Junction_30057	intronretentionleft-Junction_30057	J002	0.0113044	9.34545	0.0022354	0.0201386	12.6443	13.8823	0.45297	chr2R	5771437	5771555	119	-	130	99	160	138	0.325	0.2661	0.4145	0.4381
CG1513	intronretention_Junction_30057	intronretentionright-Junction_30057	J001	0.0118433	14.4597	0.000143189	0.00220814	16.3124	14.9317	-0.485625	chr2R	5771507	5771588	82	-	270	273	226	177	0.6122	0.661	0.4924	0.4392
CG1513	intronretention_Junction_30057	intronretentionright-Junction_30057	J002	0.01187	14.4368	0.000144944	0.00222933	14.0176	15.4713	0.517636	chr2R	5771541	5771657	117	-	171	140	233	226	0.3878	0.339	0.5076	0.5608	-0.15689
CG30007	intronretention_Junction_30092	intronretentionleft-Junction_30092	J001	0.0267474	5.75478	0.0164439	0.0915466	9.10323	7.68451	-0.632642	chr2R	5785195	5785878	684	+	92	68	12	17	0.4532	0.5312	0.24	0.3617
CG30007	intronretention_Junction_30092	intronretentionleft-Junction_30092	J002	0.0264802	5.78156	0.0161951	0.0906572	9.303	10.5472	0.508093	chr2R	5785130	5785243	114	+	111	60	38	30	0.5468	0.4688	0.76	0.6383
CG30007	intronretention_Junction_30092	intronretentionright-Junction_30092	J001	0.0322572	6.97848	0.00824958	0.0550833	9.14765	7.64406	-0.670543	chr2R	5785195	5785878	684	+	92	68	12	17	0.7023	0.68	0.3429	0.5667
CG30007	intronretention_Junction_30092	intronretentionright-Junction_30092	J002	0.0341079	6.79754	0.00912837	0.0593335	6.63443	8.3098	0.802603	chr2R	5785831	5785942	112	+	39	32	23	13	0.2977	0.32	0.6571	0.4333	-0.178724
CG7712	intronretention_Junction_31521	intronretentionleft-Junction_31521	J001	0.0176227	7.4127	0.00647649	0.045894	23.205	22.0657	-0.383571	chr2R	6785092	6785167	76	-	1051	1265	1429	1186	0.7867	0.8372	0.7022	0.7326
CG7712	intronretention_Junction_31521	intronretentionleft-Junction_31521	J002	0.0176673	7.39571	0.00653797	0.0462686	16.9094	18.1392	0.424257	chr2R	6785022	6785140	119	-	285	246	606	433	0.2133	0.1628	0.2978	0.2674
CG7712	intronretention_Junction_31521	intronretentionright-Junction_31521	J001	0.00539871	27.5789	1.50813e-07	6.0564e-06	23.2007	22.0658	-0.382088	chr2R	6785092	6785167	76	-	1051	1265	1429	1186	0.8693	0.8902	0.7869	0.7938
CG7712	intronretention_Junction_31521	intronretentionright-Junction_31521	J002	0.00545247	27.394	1.65946e-07	6.57799e-06	14.7595	16.4685	0.601244	chr2R	6785120	6785241	122	-	158	156	387	308	0.1307	0.1098	0.2131	0.2062	-0.128428
CG17528	intronretention_Junction_31626	intronretentionleft-Junction_31626	J001	0.0119272	6.75623	0.00934207	0.0602845	11.9387	10.9287	-0.388268	chr2R	705235	705288	54	-	78	62	89	99	0.7222	0.6392	0.5266	0.544
CG17528	intronretention_Junction_31626	intronretentionleft-Junction_31626	J002	0.0121382	6.70588	0.00960953	0.0616461	9.17611	10.4057	0.505363	chr2R	705166	705283	118	-	30	35	80	83	0.2778	0.3608	0.4734	0.456
CG17528	intronretention_Junction_31626	intronretentionright-Junction_31626	J001	0.0101175	12.9485	0.000320172	0.00423219	12.1037	10.7701	-0.512732	chr2R	705235	705288	54	-	78	62	89	99	0.7027	0.7381	0.5	0.544
CG17528	intronretention_Junction_31626	intronretentionright-Junction_31626	J002	0.0102933	12.8667	0.000334485	0.00438184	8.74167	10.4417	0.706343	chr2R	705241	705359	119	-	33	22	89	83	0.2973	0.2619	0.5	0.456	-0.177827
CG9005	intronretention_Junction_32307	intronretentionleft-Junction_32307	J001	0.0427139	4.4496	0.0349094	0.154844	11.5554	10.2502	-0.511399	chr2R	7508545	7508619	75	-	111	141	29	48	0.7551	0.8393	0.7073	0.5926
CG9005	intronretention_Junction_32307	intronretentionleft-Junction_32307	J002	0.0446011	4.32304	0.0375997	0.163171	6.85381	8.41848	0.738977	chr2R	7508474	7508593	120	-	36	27	12	33	0.2449	0.1607	0.2927	0.4074
CG9005	intronretention_Junction_32307	intronretentionright-Junction_32307	J001	0.018129	10.0641	0.00151187	0.0147598	11.4235	10.3626	-0.415743	chr2R	7508545	7508619	75	-	111	141	29	48	0.9098	0.8868	0.6905	0.7742
CG9005	intronretention_Junction_32307	intronretentionright-Junction_32307	J002	0.0214153	9.60277	0.00194284	0.0179782	4.83379	6.93305	1.19415	chr2R	7508572	7508686	115	-	11	18	13	14	0.0902	0.1132	0.3095	0.2258	-0.209148
rho-7	intronretention_Junction_32654	intronretentionleft-Junction_32654	J001	0.00615921	13.1939	0.000280857	0.00381588	12.4829	11.1846	-0.492889	chr2R	7874731	7874784	54	-	98	82	115	66	0.5698	0.5734	0.4107	0.3952
rho-7	intronretention_Junction_32654	intronretentionleft-Junction_32654	J002	0.00614311	13.2063	0.000279016	0.00379667	11.3859	12.6502	0.477368	chr2R	7874658	7874779	122	-	74	61	165	101	0.4302	0.4266	0.5893	0.6048
rho-7	intronretention_Junction_32654	intronretentionright-Junction_32654	J001	0.00681551	9.25404	0.00234977	0.0209928	12.3539	11.3085	-0.396836	chr2R	7874731	7874784	54	-	98	82	115	66	0.6405	0.6406	0.5	0.4818
rho-7	intronretention_Junction_32654	intronretentionright-Junction_32654	J002	0.00687764	9.22536	0.00238686	0.0212563	10.2002	11.4117	0.476397	chr2R	7874737	7874852	116	-	55	46	115	71	0.3595	0.3594	0.5	0.5182	-0.148565
CG42700	intronretention_Junction_32985	intronretentionleft-Junction_32985	J001	0.0853065	3.96537	0.0464453	0.188657	6.33759	4.47874	-1.12721	chr2R	8183970	8184066	97	+	29	38	8	0	0.3816	0.5507	0.186	INF
CG42700	intronretention_Junction_32985	intronretentionleft-Junction_32985	J002	0.0827846	4.04322	0.044349	0.18282	6.70388	8.37731	0.796997	chr2R	8183902	8184018	117	+	47	31	35	0	0.6184	0.4493	0.814	INF
CG42700	intronretention_Junction_32985	intronretentionright-Junction_32985	J001	0.0265216	9.75717	0.00178625	0.0168093	6.63715	4.25918	-1.44161	chr2R	8183970	8184066	97	+	29	38	8	0	0.4265	0.4935	0.1569	INF
CG42700	intronretention_Junction_32985	intronretentionright-Junction_32985	J002	0.0250464	9.97116	0.00159011	0.0153331	7.05752	8.70219	0.761947	chr2R	8184019	8184136	118	+	39	39	43	0	0.5735	0.5065	0.8431	INF	-0.20899
DUBAI	intronretention_Junction_33064	intronretentionleft-Junction_33064	J001	0.020215	9.11577	0.00253416	0.022309	8.89579	7.33921	-0.708111	chr2R	8321321	8321578	258	-	63	71	29	0	0.759	0.7245	0.4677	INF
DUBAI	intronretention_Junction_33064	intronretentionleft-Junction_33064	J002	0.0221067	8.79192	0.00302568	0.0256442	5.80075	7.7282	0.988342	chr2R	8321253	8321369	117	-	20	27	33	0	0.241	0.2755	0.5323	INF
DUBAI	intronretention_Junction_33064	intronretentionright-Junction_33064	J001	0.0429577	10.6048	0.00112791	0.0116488	9.28853	6.99027	-1.0467	chr2R	8321321	8321578	258	-	63	71	29	0	0.63	0.732	0.3295	INF
DUBAI	intronretention_Junction_33064	intronretentionright-Junction_33064	J002	0.0441068	10.4227	0.00124473	0.0125967	6.87207	9.21916	1.07669	chr2R	8321531	8321650	120	-	37	26	59	0	0.37	0.268	0.6705	INF	-0.309121
Dyb	intronretention_Junction_33077	intronretentionleft-Junction_33077	J001	0.075355	13.5634	0.000230639	0.00324658	7.66568	4.80936	-1.56559	chr2R	8337287	8337572	286	+	25	33	9	8	0.463	0.66	0.2093	0.129
Dyb	intronretention_Junction_33077	intronretentionleft-Junction_33077	J002	0.0730587	13.8269	0.00020045	0.00289113	6.91781	9.5149	1.17779	chr2R	8337239	8337335	97	+	29	17	34	54	0.537	0.34	0.7907	0.871
Dyb	intronretention_Junction_33077	intronretentionright-Junction_33077	J001	0.0431547	9.5517	0.00199764	0.0183849	7.34269	5.04258	-1.26072	chr2R	8337287	8337572	286	+	25	33	9	8	0.3906	0.4342	0.2432	0.1067
Dyb	intronretention_Junction_33077	intronretentionright-Junction_33077	J002	0.0401067	9.93491	0.00162174	0.015584	8.41286	10.1616	0.738585	chr2R	8337525	8337621	97	+	39	43	28	67	0.6094	0.5658	0.7568	0.8933	-0.21744
CR30055	intronretention_Junction_33341	intronretentionleft-Junction_33341	J001	0.0127581	15.0688	0.000103664	0.00168964	12.962	11.2848	-0.631587	chr2R	8477844	8477942	99	+	157	144	57	68	0.5627	0.5878	0.4161	0.3333
CR30055	intronretention_Junction_33341	intronretentionleft-Junction_33341	J002	0.0127561	15.0701	0.000103589	0.00168926	11.7949	13.4047	0.59844	chr2R	8477773	8477892	120	+	122	101	80	136	0.4373	0.4122	0.5839	0.6667
CR30055	intronretention_Junction_33341	intronretentionright-Junction_33341	J001	0.014051	80.7854	2.51604e-19	8.35403e-17	13.9912	10.3317	-1.3811	chr2R	8477844	8477942	99	+	157	144	57	68	0.797	0.8471	0.375	0.3285
CR30055	intronretention_Junction_33341	intronretentionright-Junction_33341	J002	0.0142462	80.1984	3.38648e-19	1.09068e-16	8.39425	12.6957	1.72313	chr2R	8477895	8478014	120	+	40	26	95	139	0.203	0.1529	0.625	0.6715	-0.289794
ox	intronretention_Junction_33537	intronretentionleft-Junction_33537	J001	0.0192941	60.626	6.90161e-15	1.25938e-12	25.9533	22.6188	-1.11899	chr2R	8644736	8644801	66	-	2873	2991	1235	1003	0.869	0.8923	0.635	0.5632
ox	intronretention_Junction_33537	intronretentionleft-Junction_33537	J002	0.0193265	60.5303	7.24537e-15	1.31837e-12	17.3932	20.8913	1.19432	chr2R	8644665	8644784	120	-	433	361	710	778	0.131	0.1077	0.365	0.4368
ox	intronretention_Junction_33537	intronretentionright-Junction_33537	J001	0.0167799	6.19949	0.0127787	0.0761451	24.7872	23.7805	-0.337792	chr2R	8644736	8644801	66	-	2873	2991	1235	1003	0.7028	0.7654	0.6225	0.6463
ox	intronretention_Junction_33537	intronretentionright-Junction_33537	J002	0.0167943	6.19445	0.0128151	0.0763056	20.4041	21.4412	0.351014	chr2R	8644754	8644875	122	-	1215	917	749	549	0.2972	0.2346	0.3775	0.3537	-0.223607
Fsn	intronretention_Junction_33909	intronretentionleft-Junction_33909	J001	0.0104287	5.90483	0.0150994	0.0861635	15.4465	14.6741	-0.273685	chr2R	9108881	9108943	63	-	336	267	193	86	0.7289	0.7762	0.6587	0.6418
Fsn	intronretention_Junction_33909	intronretentionleft-Junction_33909	J002	0.0106127	5.8519	0.0155603	0.0880618	11.1329	12.176	0.398148	chr2R	9108817	9108929	113	-	125	77	100	48	0.2711	0.2238	0.3413	0.3582
Fsn	intronretention_Junction_33909	intronretentionright-Junction_33909	J001	0.0108484	43.668	3.89082e-11	3.78585e-09	16.0862	14.0468	-0.722931	chr2R	9108881	9108943	63	-	336	267	193	86	0.8485	0.8841	0.6287	0.6014
Fsn	intronretention_Junction_33909	intronretentionright-Junction_33909	J002	0.0112289	42.9124	5.72457e-11	5.37526e-09	9.01147	12.1322	1.24343	chr2R	9108896	9109003	108	-	60	35	114	57	0.1515	0.1159	0.3713	0.3986	-0.212468
CG42321	intronretention_Junction_34007	intronretentionleft-Junction_34007	J001	0.00716788	13.4856	0.000240407	0.00335258	17.3517	18.3399	0.340025	chr2R	9306590	9306650	61	-	259	238	570	714	0.6491	0.6839	0.7651	0.7916
CG42321	intronretention_Junction_34007	intronretentionleft-Junction_34007	J002	0.00724749	13.395	0.000252289	0.00348958	14.5117	13.1573	-0.489878	chr2R	9306526	9306638	113	-	140	110	175	188	0.3509	0.3161	0.2349	0.2084
CG42321	intronretention_Junction_34007	intronretentionright-Junction_34007	J001	0.0186126	10.9287	0.000946878	0.0101434	17.1238	18.5737	0.498925	chr2R	9306590	9306650	61	-	259	238	570	714	0.4481	0.536	0.6397	0.6761
CG42321	intronretention_Junction_34007	intronretentionright-Junction_34007	J002	0.0186442	10.9126	0.000955145	0.0102082	17.3072	15.8094	-0.521311	chr2R	9306603	9306722	120	-	319	206	321	342	0.5519	0.464	0.3603	0.3239	0.159169
fas	intronretention_Junction_34286	intronretentionleft-Junction_34286	J001	0.0169068	5.84481	0.0156231	0.0882633	11.0632	11.8754	0.311817	chr2R	9633846	9633909	64	+	66	72	83	110	0.7174	0.7912	0.8646	0.873
fas	intronretention_Junction_34286	intronretentionleft-Junction_34286	J002	0.0189652	5.60872	0.0178713	0.0972843	7.26952	5.74881	-0.799459	chr2R	9633779	9633894	116	+	26	19	13	16	0.2826	0.2088	0.1354	0.127
fas	intronretention_Junction_34286	intronretentionright-Junction_34286	J001	0.0113521	6.71036	0.00958543	0.0615221	11.0512	11.8826	0.31922	chr2R	9633846	9633909	64	+	66	72	83	110	0.6804	0.6923	0.8384	0.7971
fas	intronretention_Junction_34286	intronretentionright-Junction_34286	J002	0.0121908	6.56495	0.0104007	0.0654886	8.31616	6.87901	-0.680626	chr2R	9633862	9633979	118	+	31	32	16	28	0.3196	0.3077	0.1616	0.2029	0.166703
Syngr	intronretention_Junction_34414	intronretentionleft-Junction_34414	J001	0.0039211	25.8375	3.71396e-07	1.3298e-05	19.3776	20.4208	0.354574	chr2R	9731216	9731277	62	-	350	317	1260	1279	0.6604	0.6443	0.7826	0.7654
Syngr	intronretention_Junction_34414	intronretentionleft-Junction_34414	J002	0.00394772	25.7402	3.90612e-07	1.38327e-05	16.7337	15.2753	-0.510651	chr2R	9731146	9731264	119	-	180	175	350	392	0.3396	0.3557	0.2174	0.2346
Syngr	intronretention_Junction_34414	intronretentionright-Junction_34414	J001	0.00435592	31.0012	2.57871e-08	1.26895e-06	19.3115	20.4875	0.399722	chr2R	9731216	9731277	62	-	350	317	1260	1279	0.6679	0.6563	0.8051	0.7861
Syngr	intronretention_Junction_34414	intronretentionright-Junction_34414	J002	0.00438933	30.8661	2.76465e-08	1.34706e-06	16.4887	14.8195	-0.586967	chr2R	9731230	9731350	121	-	174	166	305	348	0.3321	0.3437	0.1949	0.2139	0.156262
AGO1	intronretention_Junction_34547	intronretentionleft-Junction_34547	J001	0.040021	22.8818	1.72276e-06	5.07638e-05	7.6422	4.57476	-1.71268	chr2R	9839193	9842190	2998	-	35	33	6	7	0.6863	0.75	0.15	0.3182
AGO1	intronretention_Junction_34547	intronretentionleft-Junction_34547	J002	0.0408069	22.6922	1.90136e-06	5.52163e-05	5.14381	8.05966	1.53302	chr2R	9839146	9839241	96	-	16	11	34	15	0.3137	0.25	0.85	0.6818
AGO1	intronretention_Junction_34547	intronretentionright-Junction_34547	J001	0.0153885	45.4547	1.56214e-11	1.65499e-09	8.3431	4.1255	-2.35678	chr2R	9839193	9842190	2998	-	35	33	6	7	0.5469	0.55	0.1053	0.0946
AGO1	intronretention_Junction_34547	intronretentionright-Junction_34547	J002	0.0143787	46.2971	1.01615e-11	1.10007e-09	7.7288	10.3069	1.10869	chr2R	9842143	9842237	95	-	29	27	51	67	0.4531	0.45	0.8947	0.9054	-0.378851
CG17684	intronretention_Junction_35462	intronretentionleft-Junction_35462	J001	0.0327968	5.19519	0.0226495	0.114739	14.8915	13.7549	-0.407448	chr2RHet	609638	609720	83	-	202	168	195	120	0.786	0.8705	0.6989	0.7143
CG17684	intronretention_Junction_35462	intronretentionleft-Junction_35462	J002	0.0338235	5.08766	0.0240966	0.120053	9.06396	10.4348	0.564699	chr2RHet	609570	609686	117	-	55	25	84	48	0.214	0.1295	0.3011	0.2857
CG17684	intronretention_Junction_35462	intronretentionright-Junction_35462	J001	0.048567	7.77782	0.00528916	0.0393378	15.1923	13.4601	-0.621108	chr2RHet	609638	609720	83	-	202	168	195	120	0.6871	0.8116	0.5432	0.531
CG17684	intronretention_Junction_35462	intronretentionright-Junction_35462	J002	0.0488981	7.73466	0.00541706	0.0399931	11.0563	12.8562	0.681189	chr2RHet	609673	609794	122	-	92	39	164	106	0.3129	0.1884	0.4568	0.469	-0.212399
A2bp1	intronretention_Junction_36083	intronretentionleft-Junction_36083	J001	0.00944217	21.7504	3.10528e-06	8.44081e-05	14.9785	13.3815	-0.574032	chr3L	10580787	10580941	155	+	323	342	123	39	0.7052	0.7419	0.5279	0.4815
A2bp1	intronretention_Junction_36083	intronretentionleft-Junction_36083	J002	0.00957728	21.5985	3.36108e-06	9.05481e-05	11.1892	13.1342	0.731891	chr3L	10580726	10580835	110	+	135	119	110	42	0.2948	0.2581	0.4721	0.5185
A2bp1	intronretention_Junction_36083	intronretentionright-Junction_36083	J001	0.00954709	21.4056	3.71681e-06	9.90544e-05	14.8277	13.5283	-0.467025	chr3L	10580787	10580941	155	+	323	342	123	39	0.8777	0.8906	0.7321	0.6842
A2bp1	intronretention_Junction_36083	intronretentionright-Junction_36083	J002	0.0102077	20.9247	4.77694e-06	0.000123525	7.42807	9.97428	1.11665	chr3L	10580894	10580997	104	+	45	42	45	18	0.1223	0.1094	0.2679	0.3158	-0.242841
Pect	intronretention_Junction_3629	intronretentionleft-Junction_3629	J001	0.0158207	19.926	8.04983e-06	0.000194494	17.2962	18.933	0.562192	chr2L	13209599	13209658	60	+	213	230	581	1039	0.6192	0.6805	0.8408	0.8061
Pect	intronretention_Junction_3629	intronretentionleft-Junction_3629	J002	0.0159551	19.8001	8.5978e-06	0.000205498	14.7229	12.7763	-0.705479	chr2L	13209527	13209647	121	+	131	108	110	250	0.3808	0.3195	0.1592	0.1939
Pect	intronretention_Junction_3629	intronretentionright-Junction_3629	J001	0.0121869	12.7795	0.000350438	0.00455379	17.4645	18.7605	0.445102	chr2L	13209599	13209658	60	+	213	230	581	1039	0.4641	0.5399	0.642	0.6643
Pect	intronretention_Junction_3629	intronretentionright-Junction_3629	J002	0.0122143	12.7565	0.000354781	0.00459539	17.4202	16.0552	-0.474216	chr2L	13209611	13209732	122	+	246	196	324	525	0.5359	0.4601	0.358	0.3357	0.176726
Pect	intronretention_Junction_3630	intronretentionleft-Junction_3630	J001	0.00567773	13.5085	0.000237485	0.00331901	18.9336	19.8222	0.302808	chr2L	13209845	13209909	65	+	210	203	1319	1870	0.7023	0.7519	0.8254	0.8177
Pect	intronretention_Junction_3630	intronretentionleft-Junction_3630	J002	0.00575244	13.4187	0.000249128	0.00345773	14.8735	13.526	-0.484126	chr2L	13209774	13209893	120	+	89	67	279	417	0.2977	0.2481	0.1746	0.1823
Pect	intronretention_Junction_3630	intronretentionright-Junction_3630	J001	0.0081291	31.6321	1.86324e-08	9.49517e-07	18.5773	20.1831	0.547265	chr2L	13209845	13209909	65	+	210	203	1319	1870	0.6052	0.6548	0.8152	0.7937
Pect	intronretention_Junction_3630	intronretentionright-Junction_3630	J002	0.00818378	31.4921	2.00254e-08	1.0117e-06	16.359	14.352	-0.708568	chr2L	13209862	13209983	122	+	137	107	299	486	0.3948	0.3452	0.1848	0.2063	0.174778
CG7607	intronretention_Junction_36465	intronretentionleft-Junction_36465	J001	0.0220999	6.01076	0.0142189	0.0823057	14.3716	13.1619	-0.438077	chr3L	11193028	11193080	53	+	417	394	62	46	0.6726	0.7364	0.521	0.5974
CG7607	intronretention_Junction_36465	intronretentionleft-Junction_36465	J002	0.022303	5.9746	0.0145133	0.0835743	11.0069	12.3561	0.514694	chr3L	11192956	11193076	121	+	203	141	57	31	0.3274	0.2636	0.479	0.4026
CG7607	intronretention_Junction_36465	intronretentionright-Junction_36465	J001	0.0140236	9.76681	0.0017769	0.0167433	14.4269	13.1089	-0.477311	chr3L	11193028	11193080	53	+	417	394	62	46	0.615	0.6758	0.4733	0.4792
CG7607	intronretention_Junction_36465	intronretentionright-Junction_36465	J002	0.0140964	9.73813	0.00180485	0.0169496	12.0761	13.4907	0.523413	chr3L	11193033	11193152	120	+	261	189	69	50	0.385	0.3242	0.5267	0.5208	-0.162766
CG14135	intronretention_Junction_36777	intronretentionleft-Junction_36777	J001	0.0608321	8.55902	0.00343815	0.0282661	12.8627	10.6548	-0.841072	chr3L	11685459	11685520	62	+	59	117	92	80	0.7564	0.7959	0.6093	0.4301
CG14135	intronretention_Junction_36777	intronretentionleft-Junction_36777	J002	0.0613972	8.4963	0.00355869	0.0290826	8.22209	10.534	0.973057	chr3L	11685386	11685507	122	+	19	30	59	106	0.2436	0.2041	0.3907	0.5699
CG14135	intronretention_Junction_36777	intronretentionright-Junction_36777	J001	0.0257988	9.5945	0.00195161	0.0180464	12.5105	10.9715	-0.58608	chr3L	11685459	11685520	62	+	59	117	92	80	0.7468	0.8182	0.6345	0.5479
CG14135	intronretention_Junction_36777	intronretentionright-Junction_36777	J002	0.0265506	9.43012	0.00213451	0.0193951	7.72855	9.65853	0.844928	chr3L	11685473	11685587	115	+	20	26	53	66	0.2532	0.1818	0.3655	0.4521	-0.25495
Aplip1	intronretention_Junction_36951	intronretentionleft-Junction_36951	J001	0.00249423	14.8481	0.000116524	0.00185878	19.8419	19.0515	-0.269258	chr3L	1198486	1198553	68	+	806	655	563	379	0.4357	0.4426	0.3475	0.3687
Aplip1	intronretention_Junction_36951	intronretentionleft-Junction_36951	J002	0.00249043	14.8628	0.000115622	0.00184657	20.8858	21.57	0.231292	chr3L	1198413	1198534	122	+	1044	825	1057	649	0.5643	0.5574	0.6525	0.6313
Aplip1	intronretention_Junction_36951	intronretentionright-Junction_36951	J001	0.00930602	65.5814	5.57635e-16	1.20132e-13	20.7188	18.1747	-0.866876	chr3L	1198486	1198553	68	+	806	655	563	379	0.6382	0.6472	0.3751	0.3217
Aplip1	intronretention_Junction_36951	intronretentionright-Junction_36951	J002	0.00930535	65.5853	5.56514e-16	1.20132e-13	18.2376	20.7767	0.864897	chr3L	1198506	1198622	117	+	457	357	938	799	0.3618	0.3528	0.6249	0.6783	-0.139197
CG32333	intronretention_Junction_37703	intronretentionleft-Junction_37703	J001	0.00903199	22.2069	2.4479e-06	6.8533e-05	16.1134	14.6477	-0.517192	chr3L	1294038	1294091	54	+	465	232	180	105	0.722	0.7412	0.5678	0.5048
CG32333	intronretention_Junction_37703	intronretentionleft-Junction_37703	J002	0.00913237	22.0701	2.62868e-06	7.29529e-05	12.1777	13.9645	0.656834	chr3L	1293966	1294086	121	+	179	81	137	103	0.278	0.2588	0.4322	0.4952
CG32333	intronretention_Junction_37703	intronretentionright-Junction_37703	J001	0.0422718	6.22416	0.0126019	0.0754474	16.0344	14.7028	-0.469896	chr3L	1294038	1294091	54	+	465	232	180	105	0.7143	0.8084	0.6294	0.5469
CG32333	intronretention_Junction_37703	intronretentionright-Junction_37703	J002	0.0425594	6.19046	0.0128441	0.0764215	11.7616	13.1617	0.522281	chr3L	1294044	1294165	122	+	186	55	106	87	0.2857	0.1916	0.3706	0.4531	-0.204606
bru-3	intronretention_Junction_38078	intronretentionleft-Junction_38078	J001	0.0213288	11.9313	0.000551972	0.00658543	6.21532	3.56132	-1.76943	chr3L	13531096	13531208	113	-	25	20	3	4	0.2119	0.2128	0.0357	0.0952
bru-3	intronretention_Junction_38078	intronretentionleft-Junction_38078	J002	0.0176665	12.5518	0.000395827	0.00504288	10.3653	11.4354	0.419202	chr3L	13531050	13531144	95	-	93	74	81	38	0.7881	0.7872	0.9643	0.9048
bru-3	intronretention_Junction_38078	intronretentionright-Junction_38078	J001	0.0276303	18.5986	1.61339e-05	0.000351691	6.60391	3.32705	-2.1818	chr3L	13531096	13531208	113	-	25	20	3	4	0.3425	0.339	0.039	0.1333
bru-3	intronretention_Junction_38078	intronretentionright-Junction_38078	J002	0.0232255	19.7087	9.01878e-06	0.000214209	8.60908	10.2637	0.69304	chr3L	13531161	13531255	95	-	48	39	74	26	0.6575	0.661	0.961	0.8667	-0.111584
btl	intronretention_Junction_38559	intronretentionleft-Junction_38559	J001	0.0248534	5.56275	0.0183466	0.0990658	7.1667	5.81943	-0.708949	chr3L	14068913	14068974	62	+	45	27	0	18	0.7031	0.675	INF	0.4286
btl	intronretention_Junction_38559	intronretentionleft-Junction_38559	J002	0.0270384	5.39305	0.0202171	0.105935	5.05905	6.5892	0.873335	chr3L	14068848	14068961	114	+	19	13	0	24	0.2969	0.325	INF	0.5714
btl	intronretention_Junction_38559	intronretentionright-Junction_38559	J001	0.0813992	14.6904	0.00012669	0.0019966	8.28521	4.96016	-1.75152	chr3L	14068913	14068974	62	+	45	27	0	18	0.8036	0.6585	INF	0.2118
btl	intronretention_Junction_38559	intronretentionright-Junction_38559	J002	0.0815032	14.6768	0.000127607	0.00200921	5.36142	8.64055	1.65859	chr3L	14068927	14069033	107	+	11	14	0	67	0.1964	0.3415	INF	0.7882	-0.384862
CG9628	intronretention_Junction_38861	intronretentionleft-Junction_38861	J001	0.0670061	35.3126	2.80803e-09	1.7476e-07	9.96393	4.92494	-2.48969	chr3L	14620595	14620654	60	+	173	176	5	1	0.6455	0.7426	0.1562	0.0303
CG9628	intronretention_Junction_38861	intronretentionleft-Junction_38861	J002	0.0680742	34.9914	3.31161e-09	2.03156e-07	7.28135	12.0507	1.99858	chr3L	14620523	14620643	121	+	95	61	27	32	0.3545	0.2574	0.8438	0.9697
CG9628	intronretention_Junction_38861	intronretentionright-Junction_38861	J001	0.0104579	57.1358	4.06733e-14	6.64783e-12	10.0021	4.90263	-2.51972	chr3L	14620595	14620654	60	+	173	176	5	1	0.7061	0.7068	0.1562	0.0526
CG9628	intronretention_Junction_38861	intronretentionright-Junction_38861	J002	0.0108485	56.7551	4.93609e-14	7.87013e-12	7.13732	10.9729	1.65565	chr3L	14620607	14620719	113	+	72	73	27	18	0.2939	0.2932	0.8438	0.9474	-0.486106
CG9384	intronretention_Junction_38935	intronretentionleft-Junction_38935	J001	0.0220329	13.6627	0.000218756	0.00310647	9.59914	7.91355	-0.73448	chr3L	14756214	14756302	89	+	76	69	40	0	0.8352	0.8519	0.5479	INF
CG9384	intronretention_Junction_38935	intronretentionleft-Junction_38935	J002	0.0257986	12.7779	0.000350737	0.00455653	4.79044	7.32594	1.41619	chr3L	14756155	14756262	108	+	15	12	33	0	0.1648	0.1481	0.4521	INF
CG9384	intronretention_Junction_38935	intronretentionright-Junction_38935	J001	0.023761	7.34735	0.00671617	0.0472907	9.39499	8.09814	-0.564918	chr3L	14756214	14756302	89	+	76	69	40	0	0.8261	0.7841	0.5797	INF
CG9384	intronretention_Junction_38935	intronretentionright-Junction_38935	J002	0.0273718	6.90351	0.00860268	0.0568508	5.2544	7.11956	1.01952	chr3L	14756255	14756362	108	+	16	19	29	0	0.1739	0.2159	0.4203	INF	-0.307983
mRpL39	intronretention_Junction_39083	intronretentionleft-Junction_39083	J001	0.0431259	6.24831	0.0124312	0.0747309	13.5943	11.9836	-0.595946	chr3L	14991218	14991278	61	-	62	85	208	151	0.6458	0.8019	0.5239	0.5393
mRpL39	intronretention_Junction_39083	intronretentionleft-Junction_39083	J002	0.0433934	6.2198	0.0126329	0.0755841	9.81484	11.5211	0.675032	chr3L	14991148	14991266	119	-	34	21	189	129	0.3542	0.1981	0.4761	0.4607
mRpL39	intronretention_Junction_39083	intronretentionright-Junction_39083	J001	0.00990093	6.07752	0.0136913	0.0800138	13.2292	12.3186	-0.336871	chr3L	14991218	14991278	61	-	62	85	208	151	0.6526	0.7391	0.5762	0.572
mRpL39	intronretention_Junction_39083	intronretentionright-Junction_39083	J002	0.0100627	6.03555	0.0140206	0.0814653	10.0146	11.1835	0.463399	chr3L	14991231	14991352	122	-	33	30	153	113	0.3474	0.2609	0.4238	0.428	-0.171607
CG12090	intronretention_Junction_39321	intronretentionleft-Junction_39321	J001	0.0582336	5.73146	0.0166636	0.0923885	11.7425	10.246	-0.584526	chr3L	1524965	1525020	56	-	109	74	34	79	0.7078	0.74	0.4	0.594
CG12090	intronretention_Junction_39321	intronretentionleft-Junction_39321	J002	0.0590135	5.67675	0.0171912	0.0946212	8.38487	9.9556	0.667494	chr3L	1524892	1525013	122	-	45	26	51	54	0.2922	0.26	0.6	0.406
CG12090	intronretention_Junction_39321	intronretentionright-Junction_39321	J001	0.0457989	6.62379	0.0100625	0.0638582	11.7252	10.2614	-0.571745	chr3L	1524965	1525020	56	-	109	74	34	79	0.7786	0.7255	0.4533	0.6172
CG12090	intronretention_Junction_39321	intronretentionright-Junction_39321	J002	0.0468078	6.52853	0.0106158	0.0665308	7.81654	9.43715	0.711909	chr3L	1524973	1525091	119	-	31	28	41	49	0.2214	0.2745	0.5467	0.3828	-0.231703
CG12355	intronretention_Junction_39399	intronretentionleft-Junction_39399	J001	0.014751	28.5198	9.27442e-08	3.95369e-06	13.9979	11.7245	-0.840275	chr3L	15487758	15487858	101	-	123	119	116	111	0.6059	0.6919	0.3766	0.3502
CG12355	intronretention_Junction_39399	intronretentionleft-Junction_39399	J002	0.0147242	28.552	9.12177e-08	3.89119e-06	11.6347	13.9192	0.846116	chr3L	15487685	15487806	122	-	80	53	192	206	0.3941	0.3081	0.6234	0.6498
CG12355	intronretention_Junction_39399	intronretentionright-Junction_39399	J001	0.00652414	7.35842	0.00667494	0.0470518	13.2789	12.4134	-0.31965	chr3L	15487758	15487858	101	-	123	119	116	111	0.6649	0.6296	0.5249	0.5286
CG12355	intronretention_Junction_39399	intronretentionright-Junction_39399	J002	0.00659219	7.32895	0.00678527	0.0476211	10.9632	12.0025	0.398901	chr3L	15487811	15487931	121	-	62	70	105	99	0.3351	0.3704	0.4751	0.4714	-0.204094
CG13917	intronretention_Junction_39819	intronretentionleft-Junction_39819	J001	0.01609	10.7551	0.00103994	0.0109223	16.21	14.8871	-0.465735	chr3L	1599914	1599977	64	+	312	233	244	148	0.5157	0.5655	0.4101	0.3426
CG13917	intronretention_Junction_39819	intronretentionleft-Junction_39819	J002	0.0160737	10.7636	0.00103518	0.0108901	15.5947	16.8832	0.449913	chr3L	1599851	1599962	112	+	293	179	351	284	0.4843	0.4345	0.5899	0.6574
CG13917	intronretention_Junction_39819	intronretentionright-Junction_39819	J001	0.00885017	31.4198	2.07846e-08	1.04514e-06	16.4735	14.6344	-0.647545	chr3L	1599914	1599977	64	+	312	233	244	148	0.646	0.623	0.4342	0.3795
CG13917	intronretention_Junction_39819	intronretentionright-Junction_39819	J002	0.00885914	31.3991	2.1008e-08	1.05472e-06	14.2065	16.0995	0.670178	chr3L	1599930	1600046	117	+	171	141	318	242	0.354	0.377	0.5658	0.6205	-0.168282
nSyb	intronretention_Junction_40176	intronretentionleft-Junction_40176	J001	0.0242327	41.9072	9.57116e-11	8.48029e-09	17.3771	20.5382	1.08028	chr3L	1632454	1633056	603	-	186	163	1428	1668	0.25	0.3013	0.6704	0.5915
nSyb	intronretention_Junction_40176	intronretentionleft-Junction_40176	J002	0.0242401	41.8954	9.62874e-11	8.51958e-09	21.5148	18.3855	-1.0638	chr3L	1632389	1632502	114	-	558	378	702	1152	0.75	0.6987	0.3296	0.4085
nSyb	intronretention_Junction_40176	intronretentionright-Junction_40176	J001	0.0119438	24.7119	6.65705e-07	2.19788e-05	18.0907	19.8135	0.588525	chr3L	1632454	1633056	603	-	186	163	1428	1668	0.5653	0.6128	0.7947	0.7609
nSyb	intronretention_Junction_40176	intronretentionright-Junction_40176	J002	0.0119983	24.6286	6.95133e-07	2.2845e-05	16.6118	14.6466	-0.69138	chr3L	1633009	1633124	116	-	143	103	369	524	0.4347	0.3872	0.2053	0.2391	0.303716
nSyb	intronretention_Junction_40209	intronretentionleft-Junction_40209	J001	0.0291335	6.22686	0.0125827	0.0753774	15.2147	13.9987	-0.433891	chr3L	1634907	1635184	278	-	335	247	66	162	0.6124	0.5771	0.3646	0.488
nSyb	intronretention_Junction_40209	intronretentionleft-Junction_40209	J002	0.0291831	6.21853	0.012642	0.0756241	13.6517	14.8796	0.44064	chr3L	1634836	1634955	120	-	212	181	115	170	0.3876	0.4229	0.6354	0.512
nSyb	intronretention_Junction_40209	intronretentionright-Junction_40209	J001	0.0445894	25.2214	5.11129e-07	1.75781e-05	16.1911	13.0584	-1.11905	chr3L	1634907	1635184	278	-	335	247	66	162	0.6058	0.6222	0.1891	0.2967
nSyb	intronretention_Junction_40209	intronretentionright-Junction_40209	J002	0.0445356	25.2484	5.0401e-07	1.73704e-05	14.3122	17.4042	1.08545	chr3L	1635137	1635239	103	-	218	150	283	384	0.3942	0.3778	0.8109	0.7033	-0.248373
TMS1	intronretention_Junction_40324	intronretentionleft-Junction_40324	J001	0.0174919	11.9298	0.000552445	0.00658863	24.5243	23.1088	-0.475323	chr3L	16407078	16407136	59	+	942	835	2923	3034	0.6165	0.6734	0.4523	0.5138
TMS1	intronretention_Junction_40324	intronretentionleft-Junction_40324	J002	0.0174926	11.9293	0.000552589	0.00658912	21.9828	23.4093	0.480209	chr3L	16407007	16407126	120	+	586	405	3540	2871	0.3835	0.3266	0.5477	0.4862
TMS1	intronretention_Junction_40324	intronretentionright-Junction_40324	J001	0.00663778	23.5026	1.24742e-06	3.86677e-05	24.4462	23.1862	-0.423132	chr3L	16407078	16407136	59	+	942	835	2923	3034	0.7072	0.7422	0.6012	0.5761
TMS1	intronretention_Junction_40324	intronretentionright-Junction_40324	J002	0.0066422	23.4895	1.25599e-06	3.89146e-05	20.3141	21.6655	0.457263	chr3L	16407089	16407209	121	+	390	290	1939	2232	0.2928	0.2578	0.3988	0.4239	-0.158065
CG7970	intronretention_Junction_40449	intronretentionleft-Junction_40449	J001	0.034499	8.55628	0.00344332	0.0282978	11.7096	9.89901	-0.712598	chr3L	1653254	1653315	62	+	77	93	68	41	0.435	0.5671	0.2677	0.3154
CG7970	intronretention_Junction_40449	intronretentionleft-Junction_40449	J002	0.0342352	8.60581	0.00335091	0.0277187	11.6757	13.3676	0.630283	chr3L	1653180	1653302	123	+	100	71	186	89	0.565	0.4329	0.7323	0.6846
CG7970	intronretention_Junction_40449	intronretentionright-Junction_40449	J001	0.0440226	4.66478	0.0307873	0.142487	11.4975	10.0991	-0.550209	chr3L	1653254	1653315	62	+	77	93	68	41	0.4162	0.5776	0.3238	0.3178
CG7970	intronretention_Junction_40449	intronretentionright-Junction_40449	J002	0.0437785	4.68481	0.0304305	0.141242	11.5559	12.8986	0.50402	chr3L	1653268	1653388	121	+	108	68	142	88	0.5838	0.4224	0.6762	0.6822	-0.155623
CG7971	intronretention_Junction_40564	intronretentionleft-Junction_40564	J001	0.0146913	6.53276	0.0105906	0.0664117	10.6955	9.31104	-0.563405	chr3L	1661592	1661705	114	-	118	116	23	28	0.2351	0.2742	0.1322	0.1818
CG7971	intronretention_Junction_40564	intronretentionleft-Junction_40564	J002	0.0142415	6.63914	0.00997622	0.06348	14.8796	15.7875	0.320507	chr3L	1661525	1661640	116	-	384	307	151	126	0.7649	0.7258	0.8678	0.8182
CG7971	intronretention_Junction_40564	intronretentionright-Junction_40564	J001	0.0141589	18.3393	1.8485e-05	0.000395185	10.7377	9.27135	-0.596752	chr3L	1661592	1661705	114	-	118	116	23	28	0.8872	0.8855	0.6053	0.6667
CG7971	intronretention_Junction_40564	intronretentionright-Junction_40564	J002	0.0164236	17.6967	2.59076e-05	0.000529949	4.67273	7.44817	1.55376	chr3L	1661658	1661764	107	-	15	15	15	14	0.1128	0.1145	0.3947	0.3333	-0.10236
Abl	intronretention_Junction_40566	intronretentionleft-Junction_40566	J001	0.0708282	9.17697	0.0024508	0.0216998	5.75881	3.27216	-1.77223	chr3L	16616388	16616735	348	-	22	22	2	3	0.234	0.3929	0.0667	0.0698
Abl	intronretention_Junction_40566	intronretentionleft-Junction_40566	J002	0.0644873	9.56253	0.00198589	0.0183003	8.22353	9.99952	0.757635	chr3L	16616343	16616436	94	-	72	34	28	40	0.766	0.6071	0.9333	0.9302
Abl	intronretention_Junction_40566	intronretentionright-Junction_40566	J001	0.049014	5.97244	0.0145312	0.0836396	5.45651	3.46697	-1.42031	chr3L	16616388	16616735	348	-	22	22	2	3	0.2933	0.4231	0.1667	0.0968
Abl	intronretention_Junction_40566	intronretentionright-Junction_40566	J002	0.0443467	6.18559	0.0128795	0.0765615	7.1196	8.44215	0.61688	chr3L	16616688	16616783	96	-	53	30	10	28	0.7067	0.5769	0.8333	0.9032	-0.15661
TSG101	intronretention_Junction_40753	intronretentionleft-Junction_40753	J001	0.0568652	7.6712	0.00561093	0.0410427	14.2275	16.0594	0.648598	chr3L	16836132	16836201	70	+	130	95	366	407	0.5702	0.546	0.8281	0.7165
TSG101	intronretention_Junction_40753	intronretentionleft-Junction_40753	J002	0.0572389	7.62784	0.00574742	0.0418605	13.2845	11.4016	-0.704902	chr3L	16836066	16836180	115	+	98	79	76	161	0.4298	0.454	0.1719	0.2835
TSG101	intronretention_Junction_40753	intronretentionright-Junction_40753	J001	0.0122085	17.5662	2.77473e-05	0.000562756	14.4203	15.868	0.512485	chr3L	16836132	16836201	70	+	130	95	366	407	0.625	0.6169	0.7722	0.8189
TSG101	intronretention_Junction_40753	intronretentionright-Junction_40753	J002	0.0124258	17.39	3.04417e-05	0.00060911	12.4629	10.5286	-0.742783	chr3L	16836154	16836267	114	+	78	59	108	90	0.375	0.3831	0.2278	0.1811	0.225717
Nc73EF	intronretention_Junction_40830	intronretentionleft-Junction_40830	J001	0.0206709	16.769	4.22174e-05	0.000803603	7.64668	9.55328	0.839707	chr3L	16955987	16956041	55	+	17	30	57	53	0.5	0.4478	0.8261	0.7465
Nc73EF	intronretention_Junction_40830	intronretentionleft-Junction_40830	J002	0.0218692	16.4217	5.07005e-05	0.00093416	8.09166	5.65784	-1.23807	chr3L	16955916	16956035	120	+	17	37	12	18	0.5	0.5522	0.1739	0.2535
Nc73EF	intronretention_Junction_40830	intronretentionright-Junction_40830	J001	0.0845945	7.25427	0.00707326	0.0491549	7.61417	9.62116	0.883186	chr3L	16955987	16956041	55	+	17	30	57	53	0.3036	0.5556	0.7308	0.7465
Nc73EF	intronretention_Junction_40830	intronretentionright-Junction_40830	J002	0.0860952	7.16308	0.00744194	0.0511323	8.45519	6.38494	-0.998044	chr3L	16955994	16956111	118	+	39	24	21	18	0.6964	0.4444	0.2692	0.2535	0.333146
scaf6	intronretention_Junction_40883	intronretentionleft-Junction_40883	J001	0.0235562	5.97532	0.0145074	0.0835606	14.2894	13.2956	-0.359674	chr3L	17030973	17031029	57	-	188	162	131	123	0.821	0.8901	0.7443	0.7455
scaf6	intronretention_Junction_40883	intronretentionleft-Junction_40883	J002	0.025056	5.77614	0.0162452	0.0908032	7.88752	9.31493	0.627778	chr3L	17030909	17031021	113	-	41	20	45	42	0.179	0.1099	0.2557	0.2545
scaf6	intronretention_Junction_40883	intronretentionright-Junction_40883	J001	0.0180508	5.93576	0.0148366	0.0850256	14.241	13.3431	-0.324955	chr3L	17030973	17031029	57	-	188	162	131	123	0.8704	0.81	0.7238	0.75
scaf6	intronretention_Junction_40883	intronretentionright-Junction_40883	J002	0.0190752	5.76364	0.0163612	0.0912852	8.14672	9.50839	0.590256	chr3L	17030982	17031102	121	-	28	38	50	41	0.1296	0.19	0.2762	0.25	-0.145574
CG32174	intronretention_Junction_41163	intronretentionleft-Junction_41163	J001	0.00556084	28.0576	1.17756e-07	4.87165e-06	15.8785	14.5992	-0.452231	chr3L	17422403	17422475	73	-	278	262	199	138	0.8201	0.8317	0.6568	0.6509
CG32174	intronretention_Junction_41163	intronretentionleft-Junction_41163	J002	0.00571638	27.7667	1.36864e-07	5.56213e-06	9.84914	12.0839	0.874751	chr3L	17422334	17422451	118	-	61	53	104	74	0.1799	0.1683	0.3432	0.3491
CG32174	intronretention_Junction_41163	intronretentionright-Junction_41163	J001	0.00896307	17.3392	3.12678e-05	0.000622784	15.7713	14.7041	-0.377257	chr3L	17422403	17422475	73	-	278	262	199	138	0.8742	0.9003	0.7683	0.7541
CG32174	intronretention_Junction_41163	intronretentionright-Junction_41163	J002	0.00949568	16.9518	3.83413e-05	0.000739765	8.07211	10.223	0.916615	chr3L	17422428	17422537	110	-	40	29	60	45	0.1258	0.0997	0.2317	0.2459	-0.204981
Taf6	intronretention_Junction_42629	intronretentionleft-Junction_42629	J001	0.0757532	24.0226	9.52106e-07	3.01667e-05	6.81958	2.77593	-2.83629	chr3L	19594249	19594308	60	+	17	29	4	1	0.3953	0.58	0.0741	0.0233
Taf6	intronretention_Junction_42629	intronretentionleft-Junction_42629	J002	0.0691668	25.1483	5.30863e-07	1.80911e-05	6.8309	9.85348	1.3614	chr3L	19594207	19594297	91	+	26	21	50	42	0.6047	0.42	0.9259	0.9767
Taf6	intronretention_Junction_42629	intronretentionright-Junction_42629	J001	0.177063	9.66678	0.0018763	0.017488	6.15751	3.1202	-2.13828	chr3L	19594249	19594308	60	+	17	29	4	1	0.1809	0.3919	0.0571	0.0143
Taf6	intronretention_Junction_42629	intronretentionright-Junction_42629	J002	0.167442	10.0404	0.00153146	0.0149026	9.00368	12.1844	1.26638	chr3L	19594261	19594356	96	+	77	45	66	69	0.8191	0.6081	0.9429	0.9857	-0.202334
cyc	intronretention_Junction_42824	intronretentionleft-Junction_42824	J001	0.0137928	5.4477	0.0195941	0.103683	11.0731	10.1095	-0.382047	chr3L	19808595	19808853	259	-	78	67	57	58	0.6667	0.6837	0.4914	0.5743
cyc	intronretention_Junction_42824	intronretentionleft-Junction_42824	J002	0.0141151	5.39442	0.0202012	0.105887	8.52024	9.67896	0.494016	chr3L	19808522	19808643	122	-	39	31	59	43	0.3333	0.3163	0.5086	0.4257
cyc	intronretention_Junction_42824	intronretentionright-Junction_42824	J001	0.0122766	14.2956	0.000156231	0.00236509	11.3376	9.85758	-0.587009	chr3L	19808595	19808853	259	-	78	67	57	58	0.75	0.7363	0.5534	0.4874
cyc	intronretention_Junction_42824	intronretentionright-Junction_42824	J002	0.0126521	14.1341	0.00017023	0.0025406	7.68309	9.61021	0.846223	chr3L	19808806	19808921	116	-	26	24	46	61	0.25	0.2637	0.4466	0.5126	-0.192379
Fibp	intronretention_Junction_42826	intronretentionleft-Junction_42826	J001	0.032512	19.9159	8.09245e-06	0.000195304	15.7672	13.2632	-0.895495	chr3L	19809381	19809444	64	-	162	205	171	170	0.7678	0.8266	0.57	0.4683
Fibp	intronretention_Junction_42826	intronretentionleft-Junction_42826	J002	0.0327197	19.816	8.5264e-06	0.000204019	10.3292	13.0565	1.04199	chr3L	19809308	19809429	122	-	49	43	129	193	0.2322	0.1734	0.43	0.5317
Fibp	intronretention_Junction_42826	intronretentionright-Junction_42826	J001	0.038441	9.41615	0.00215083	0.0195159	15.4445	13.5757	-0.668083	chr3L	19809381	19809444	64	-	162	205	171	170	0.6353	0.7565	0.5015	0.4521
Fibp	intronretention_Junction_42826	intronretentionright-Junction_42826	J002	0.0385508	9.39353	0.00217753	0.0197082	12.0487	13.975	0.709171	chr3L	19809397	19809517	121	-	93	66	170	206	0.3647	0.2435	0.4985	0.5479	-0.261581
RhoBTB	intronretention_Junction_43518	intronretentionleft-Junction_43518	J001	0.00607871	12.6428	0.000377005	0.00484622	14.3685	13.2424	-0.407458	chr3L	20373753	20373813	61	+	85	115	248	197	0.6589	0.697	0.5199	0.5383
RhoBTB	intronretention_Junction_43518	intronretentionleft-Junction_43518	J002	0.00611926	12.6096	0.000383775	0.00491754	11.4063	12.8026	0.525926	chr3L	20373687	20373801	115	+	44	50	229	169	0.3411	0.303	0.4801	0.4617
RhoBTB	intronretention_Junction_43518	intronretentionright-Junction_43518	J001	0.0267333	8.00312	0.00466967	0.0358427	14.5607	13.0755	-0.537411	chr3L	20373753	20373813	61	+	85	115	248	197	0.6589	0.7516	0.5624	0.49
RhoBTB	intronretention_Junction_43518	intronretentionright-Junction_43518	J002	0.0268448	7.97908	0.0047321	0.0362189	11.0444	12.6528	0.610556	chr3L	20373766	20373886	121	+	44	38	193	205	0.3411	0.2484	0.4376	0.51	-0.171337
Las	intronretention_Junction_43588	intronretentionleft-Junction_43588	J001	0.0116314	18.6247	1.59146e-05	0.000347971	9.92135	11.6256	0.671427	chr3L	20424490	20424546	57	-	31	33	121	164	0.4559	0.541	0.7423	0.7628
Las	intronretention_Junction_43588	intronretentionleft-Junction_43588	J002	0.0121355	18.3481	1.84004e-05	0.000394293	9.96375	7.74117	-0.96425	chr3L	20424432	20424538	107	-	37	28	42	51	0.5441	0.459	0.2577	0.2372
Las	intronretention_Junction_43588	intronretentionright-Junction_43588	J001	0.0147055	6.63723	0.00998691	0.0635186	10.311	11.2181	0.35718	chr3L	20424490	20424546	57	-	31	33	121	164	0.6739	0.7333	0.8643	0.8325
Las	intronretention_Junction_43588	intronretentionright-Junction_43588	J002	0.0165055	6.43595	0.0111833	0.0690608	7.43464	5.80156	-0.848978	chr3L	20424499	20424616	118	-	15	12	19	33	0.3261	0.2667	0.1357	0.1675	0.250288
Psn	intronretention_Junction_43597	intronretentionleft-Junction_43597	J001	0.0233431	11.0525	0.000885666	0.00959134	12.7589	11.1345	-0.614822	chr3L	20426410	20426476	67	+	47	64	134	172	0.7833	0.7356	0.4908	0.5791
Psn	intronretention_Junction_43597	intronretentionleft-Junction_43597	J002	0.0235302	11.0058	0.00090825	0.00978983	8.66509	10.5772	0.793623	chr3L	20426338	20426458	121	+	13	23	139	125	0.2167	0.2644	0.5092	0.4209
Psn	intronretention_Junction_43597	intronretentionright-Junction_43597	J001	0.00692293	3.88674	0.0486687	0.194765	12.2976	11.5572	-0.280215	chr3L	20426410	20426476	67	+	47	64	134	172	0.5732	0.6214	0.5057	0.4928
Psn	intronretention_Junction_43597	intronretentionright-Junction_43597	J002	0.00694528	3.88246	0.048793	0.195093	10.7614	11.5832	0.31871	chr3L	20426429	20426544	116	+	35	39	131	177	0.4268	0.3786	0.4943	0.5072	-0.15406
Ror	intronretention_Junction_441	intronretentionleft-Junction_441	J001	0.0385543	4.10306	0.0428058	0.178604	15.1175	13.9279	-0.42505	chr2L	10254115	10254191	77	+	212	225	137	153	0.5889	0.712	0.4757	0.5312
Ror	intronretention_Junction_441	intronretentionleft-Junction_441	J002	0.0386688	4.09284	0.0430652	0.179262	12.6416	13.8618	0.446569	chr2L	10254046	10254163	118	+	148	91	151	135	0.4111	0.288	0.5243	0.4688
Ror	intronretention_Junction_441	intronretentionright-Junction_441	J001	0.00595589	11.9642	0.000542322	0.00650282	15.049	13.9812	-0.381533	chr2L	10254115	10254191	77	+	212	225	137	153	0.5506	0.5711	0.4102	0.45
Ror	intronretention_Junction_441	intronretentionright-Junction_441	J002	0.0059578	11.9622	0.000542899	0.00650731	14.0504	15.111	0.378595	chr2L	10254144	10254264	121	+	173	169	197	187	0.4494	0.4289	0.5898	0.55	-0.128543
CG10508	intronretention_Junction_44277	intronretentionleft-Junction_44277	J001	0.0285916	4.12246	0.0423174	0.177371	18.221	19.1526	0.318721	chr3L	21208601	21208674	74	+	680	496	514	309	0.5152	0.5339	0.5956	0.7007
CG10508	intronretention_Junction_44277	intronretentionleft-Junction_44277	J002	0.0286137	4.11966	0.0423876	0.177538	17.8253	16.8787	-0.327005	chr3L	21208535	21208649	115	+	640	433	349	132	0.4848	0.4661	0.4044	0.2993
CG10508	intronretention_Junction_44277	intronretentionright-Junction_44277	J001	0.00348746	16.9593	3.81903e-05	0.000737629	18.2564	19.1329	0.299851	chr3L	21208601	21208674	74	+	680	496	514	309	0.5812	0.5714	0.6965	0.6703
CG10508	intronretention_Junction_44277	intronretentionright-Junction_44277	J002	0.00349989	16.9256	3.88736e-05	0.000748357	16.9621	15.8677	-0.381418	chr3L	21208627	21208745	119	+	490	372	224	152	0.4188	0.4286	0.3035	0.3297	0.118502
CG9391	intronretention_Junction_44322	intronretentionleft-Junction_44322	J001	0.0033334	35.2385	2.91702e-09	1.81019e-07	21.4563	20.4262	-0.348609	chr3L	21260635	21260685	51	-	655	595	1191	1024	0.8653	0.8598	0.7505	0.763
CG9391	intronretention_Junction_44322	intronretentionleft-Junction_44322	J002	0.00336707	35.065	3.18886e-09	1.96374e-07	13.7993	15.6788	0.669509	chr3L	21260565	21260683	119	-	102	97	396	318	0.1347	0.1402	0.2495	0.237
CG9391	intronretention_Junction_44322	intronretentionright-Junction_44322	J001	0.00390659	38.519	5.42238e-10	3.97358e-08	21.5087	20.3742	-0.383944	chr3L	21260635	21260685	51	-	655	595	1191	1024	0.8851	0.8763	0.7779	0.7636
CG9391	intronretention_Junction_44322	intronretentionright-Junction_44322	J002	0.00395176	38.2976	6.07379e-10	4.40087e-08	13.2013	15.2929	0.751168	chr3L	21260638	21260753	116	-	85	84	340	317	0.1149	0.1237	0.2221	0.2364	-0.154682
CycH	intronretention_Junction_44797	intronretentionleft-Junction_44797	J001	0.0139629	5.4598	0.0194589	0.103195	11.3809	10.4636	-0.359033	chr3L	21816152	21816209	58	+	101	66	47	73	0.7266	0.6804	0.5281	0.5984
CycH	intronretention_Junction_44797	intronretentionleft-Junction_44797	J002	0.0144158	5.3874	0.0202827	0.106124	8.30177	9.47686	0.507273	chr3L	21816087	21816200	114	+	38	31	42	49	0.2734	0.3196	0.4719	0.4016
CycH	intronretention_Junction_44797	intronretentionright-Junction_44797	J001	0.00990269	16.7786	4.20044e-05	0.000800021	11.7086	10.1517	-0.609585	chr3L	21816152	21816209	58	+	101	66	47	73	0.7113	0.7253	0.5165	0.4679
CycH	intronretention_Junction_44797	intronretentionright-Junction_44797	J002	0.0101169	16.6449	4.50707e-05	0.000848636	8.42849	10.3593	0.811067	chr3L	21816162	21816278	117	+	41	25	44	83	0.2887	0.2747	0.4835	0.5321	-0.196307
msn	intronretention_Junction_46569	intronretentionleft-Junction_46569	J001	0.0204618	24.168	8.8289e-07	2.82656e-05	14.4594	12.3018	-0.787993	chr3L	2557508	2557570	63	-	163	259	80	87	0.7837	0.852	0.5594	0.5613
msn	intronretention_Junction_46569	intronretentionleft-Junction_46569	J002	0.020974	23.7967	1.07064e-06	3.35594e-05	8.64915	11.3782	1.11341	chr3L	2557435	2557556	122	-	45	45	63	68	0.2163	0.148	0.4406	0.4387
msn	intronretention_Junction_46569	intronretentionright-Junction_46569	J001	0.0322672	7.33525	0.00676152	0.0475009	14.1537	12.6016	-0.566606	chr3L	2557508	2557570	63	-	163	259	80	87	0.6849	0.7778	0.5882	0.521
msn	intronretention_Junction_46569	intronretentionright-Junction_46569	J002	0.0326327	7.27241	0.00700216	0.048745	10.1189	11.8222	0.666035	chr3L	2557523	2557642	120	-	75	74	56	80	0.3151	0.2222	0.4118	0.479	-0.244467
miple	intronretention_Junction_46757	intronretentionleft-Junction_46757	J001	0.0421664	7.42777	0.0064225	0.0455888	22.173	23.7393	0.526938	chr3L	267869	268218	350	+	457	409	3532	4624	0.9195	0.9512	0.9779	0.9674
miple	intronretention_Junction_46757	intronretentionleft-Junction_46757	J002	0.0429568	7.3176	0.00682827	0.0478342	11.25	9.41915	-0.734595	chr3L	267805	267917	113	+	40	21	80	156	0.0805	0.0488	0.0221	0.0326
miple	intronretention_Junction_46757	intronretentionright-Junction_46757	J001	0.00832811	50.566	1.15226e-12	1.45917e-10	21.9176	23.9943	0.698671	chr3L	267869	268218	350	+	457	409	3532	4624	0.5396	0.5971	0.7751	0.7896
miple	intronretention_Junction_46757	intronretentionright-Junction_46757	J002	0.00834382	50.4856	1.20045e-12	1.51323e-10	20.7688	18.5109	-0.768559	chr3L	268171	268289	119	+	390	276	1025	1232	0.4604	0.4029	0.2249	0.2104	0.218144
miple	intronretention_Junction_46766	intronretentionleft-Junction_46766	J001	0.058762	6.50368	0.0107651	0.0672053	24.1042	26.0154	0.640532	chr3L	268459	268561	103	+	1192	1167	3419	4523	0.464	0.5266	0.6317	0.7687
miple	intronretention_Junction_46766	intronretentionleft-Junction_46766	J002	0.0587795	6.50177	0.0107767	0.0672321	24.1846	22.2711	-0.643397	chr3L	268386	268507	122	+	1377	1049	1993	1361	0.536	0.4734	0.3683	0.2313
miple	intronretention_Junction_46766	intronretentionright-Junction_46766	J001	0.00814215	10.6878	0.00107846	0.0112377	24.6076	25.5088	0.302001	chr3L	268459	268561	103	+	1192	1167	3419	4523	0.656	0.706	0.7718	0.7656
miple	intronretention_Junction_46766	intronretentionright-Junction_46766	J002	0.0081529	10.6751	0.0010859	0.0113	21.3469	20.3735	-0.329536	chr3L	268514	268634	121	+	625	486	1011	1385	0.344	0.294	0.2282	0.2344	0.174718
CG11537	intronretention_Junction_47192	intronretentionleft-Junction_47192	J001	0.0468975	6.08081	0.0136658	0.0799083	14.8421	13.2995	-0.555553	chr3L	3130178	3130237	60	-	223	138	153	133	0.8814	0.7931	0.6595	0.7228
CG11537	intronretention_Junction_47192	intronretentionleft-Junction_47192	J002	0.0478817	5.98219	0.0144511	0.0833342	8.56634	10.3023	0.727318	chr3L	3130115	3130226	112	-	30	36	79	51	0.1186	0.2069	0.3405	0.2772
CG11537	intronretention_Junction_47192	intronretentionright-Junction_47192	J001	0.0185686	31.5616	1.93209e-08	9.82271e-07	15.2371	12.9247	-0.833107	chr3L	3130178	3130237	60	-	223	138	153	133	0.7743	0.8519	0.524	0.5155
CG11537	intronretention_Junction_47192	intronretentionright-Junction_47192	J002	0.0189153	31.1975	2.3307e-08	1.1593e-06	9.83749	12.6139	1.07773	chr3L	3130190	3130307	118	-	65	24	139	125	0.2257	0.1481	0.476	0.4845	-0.277704
NDUFS3	intronretention_Junction_47227	intronretentionleft-Junction_47227	J001	0.0177539	7.5316	0.00606262	0.0436284	17.4411	18.6513	0.415825	chr3L	3159215	3159272	58	-	394	367	607	324	0.463	0.5097	0.6584	0.5838
NDUFS3	intronretention_Junction_47227	intronretentionleft-Junction_47227	J002	0.0177682	7.52624	0.00608065	0.0437435	17.6765	16.4367	-0.42939	chr3L	3159145	3159263	119	-	457	353	315	231	0.537	0.4903	0.3416	0.4162
NDUFS3	intronretention_Junction_47227	intronretentionright-Junction_47227	J001	0.00643703	6.09493	0.013557	0.0794213	17.7029	18.3904	0.236221	chr3L	3159215	3159272	58	-	394	367	607	324	0.5621	0.5863	0.6729	0.6328
NDUFS3	intronretention_Junction_47227	intronretentionright-Junction_47227	J002	0.00645914	6.08018	0.0136707	0.0799223	16.4587	15.6696	-0.276048	chr3L	3159225	3159344	120	-	307	259	295	188	0.4379	0.4137	0.3271	0.3672	0.109862
CG12006	intronretention_Junction_47808	intronretentionleft-Junction_47808	J001	0.00914839	14.8226	0.00011811	0.00188129	13.6554	12.2705	-0.510241	chr3L	3813360	3813449	90	+	196	137	91	85	0.6068	0.6432	0.4174	0.4696
CG12006	intronretention_Junction_47808	intronretentionleft-Junction_47808	J002	0.00919314	14.7862	0.000120412	0.00191134	11.7241	13.1865	0.545622	chr3L	3813294	3813408	115	+	127	76	127	96	0.3932	0.3568	0.5826	0.5304
CG12006	intronretention_Junction_47808	intronretentionright-Junction_47808	J001	0.00693353	22.8868	1.71826e-06	5.07009e-05	13.7748	12.1572	-0.596009	chr3L	3813360	3813449	90	+	196	137	91	85	0.6384	0.6256	0.4461	0.4009
CG12006	intronretention_Junction_47808	intronretentionright-Junction_47808	J002	0.00696534	22.8401	1.76053e-06	5.16642e-05	11.66	13.3708	0.637408	chr3L	3813402	3813522	121	+	111	82	113	127	0.3616	0.3744	0.5539	0.5991	-0.182561
Ccz1	intronretention_Junction_47883	intronretentionleft-Junction_47883	J001	0.0130441	8.74182	0.00310994	0.026169	10.202	11.3228	0.441422	chr3L	3897940	3898002	63	-	54	64	103	52	0.587	0.5565	0.7203	0.7879
Ccz1	intronretention_Junction_47883	intronretentionleft-Junction_47883	J002	0.0135499	8.62462	0.00331649	0.0274762	9.21922	7.70308	-0.673171	chr3L	3897867	3897988	122	-	38	51	40	14	0.413	0.4435	0.2797	0.2121
Ccz1	intronretention_Junction_47883	intronretentionright-Junction_47883	J001	0.0113429	11.165	0.00083356	0.00916261	10.1727	11.353	0.464897	chr3L	3897940	3898002	63	-	54	64	103	52	0.5745	0.6214	0.7863	0.7879
Ccz1	intronretention_Junction_47883	intronretentionright-Junction_47883	J002	0.0119301	10.983	0.000919531	0.00989235	8.77572	6.98102	-0.831998	chr3L	3897955	3898065	111	-	40	39	28	14	0.4255	0.3786	0.2137	0.2121	0.213832
Eip63F-1	intronretention_Junction_47921	intronretentionleft-Junction_47921	J001	0.0774131	5.0834	0.0241559	0.120264	11.402	13.391	0.743627	chr3L	3924477	3925461	985	-	18	26	447	525	0.087	0.2	0.2636	0.3213
Eip63F-1	intronretention_Junction_47921	intronretentionleft-Junction_47921	J002	0.0771518	5.09823	0.0239502	0.119536	18.9596	16.9835	-0.679444	chr3L	3924407	3924525	119	-	189	104	1249	1109	0.913	0.8	0.7364	0.6787
Eip63F-1	intronretention_Junction_47921	intronretentionright-Junction_47921	J001	0.0338141	11.3931	0.000737162	0.00828539	11.3	13.4828	0.816414	chr3L	3924477	3925461	985	-	18	26	447	525	0.1259	0.2407	0.3725	0.3892
Eip63F-1	intronretention_Junction_47921	intronretentionright-Junction_47921	J002	0.0336569	11.4319	0.000721938	0.00814983	17.4316	15.4303	-0.697604	chr3L	3925414	3925523	110	-	125	82	753	824	0.8741	0.7593	0.6275	0.6108	0.109627
CG11594	intronretention_Junction_47995	intronretentionleft-Junction_47995	J001	0.215801	6.63218	0.0100153	0.0636593	7.1764	4.39895	-1.61202	chr3L	4023216	4023274	59	-	29	55	1	7	0.3021	0.4015	0.0159	0.1458
CG11594	intronretention_Junction_47995	intronretentionleft-Junction_47995	J002	0.209636	6.77452	0.00924682	0.0598848	8.94243	12.0582	1.24517	chr3L	4023148	4023264	117	-	67	82	62	41	0.6979	0.5985	0.9841	0.8542
CG11594	intronretention_Junction_47995	intronretentionright-Junction_47995	J001	0.285173	5.38956	0.0202576	0.106033	7.09396	4.4599	-1.52836	chr3L	4023216	4023274	59	-	29	55	1	7	0.4754	0.7051	0.0417	0.3043
CG11594	intronretention_Junction_47995	intronretentionright-Junction_47995	J002	0.285729	5.38175	0.0203484	0.106347	5.84649	8.68133	1.39262	chr3L	4023227	4023324	98	-	32	23	23	16	0.5246	0.2949	0.9583	0.6957	-0.224655
nAChRbeta1	intronretention_Junction_48447	intronretentionleft-Junction_48447	J001	0.0634092	8.78004	0.00304545	0.0257725	15.3482	13.2718	-0.74489	chr3L	4429502	4429564	63	+	328	289	122	65	0.8586	0.8475	0.7305	0.5417
nAChRbeta1	intronretention_Junction_48447	intronretentionleft-Junction_48447	J002	0.0645705	8.64866	0.00327301	0.0272071	8.71726	10.9143	0.903619	chr3L	4429433	4429550	118	+	54	52	45	55	0.1414	0.1525	0.2695	0.4583
nAChRbeta1	intronretention_Junction_48447	intronretentionright-Junction_48447	J001	0.0120832	85.011	2.96707e-20	1.09839e-17	16.1984	12.4723	-1.33842	chr3L	4429502	4429564	63	+	328	289	122	65	0.4932	0.5568	0.175	0.1562
[truncated: 669 more rows]

## Sheet: AS MXE events
Gene	AS_event_ID	AS_structure_ID	sub_junction_ID	sub-junction_dispersion_estimate	LRT_statistic-full_vs_reduced	LRT_p_value-full_vs_reduced	BH_adjusted_p-values	DN1	LNv	fitting_parameter_log2fold_change_LNv_DN1	sub_junction_chr	sub_junction_start_coor	sub_junction_end_coor	sub_junction_size	sub_junction_strand	raw_count.DN1_A	raw_count.DN1_B	raw_count.LNv_A	raw_count.LNv_B	percentage_usage.DN1_A	percentage_usage.DN1_B	percentage_usage.LNv_A	percentage_usage.LNv_B	deltaPSI
[truncated: 44 more rows]

[truncated: 1 more sheets: Notes]
