# Supplementary material for: Striking circadian neuron diversity and cycling of Drosophila alternative splicing
Source: eLife journal article supplement (doi:10.7554/elife.35618), 2018-06-04
Supplement: supp [file elife-35618-supp-v1.zip › elife_poa_e35618_Figure_3_source_data_7.xlsx]

## Sheet: DN1_vs_TH_qvalue_0_05
	baseMean	log2FoldChange	lfcSE	stat	pvalue	padj
CG3906	119854	15.7659	0.922032	17.099	1.50892e-65	1.83364e-61
CG34324	370328	14.2865	0.865227	16.5119	3.01286e-61	1.83061e-57
Muc68D	288591	17.1152	1.12533	15.2091	3.07914e-52	1.20641e-48
gl	9709.96	-6.58308	0.433314	-15.1924	3.97107e-52	1.20641e-48
Drs	20344.5	10.1999	0.811572	12.5681	3.16171e-36	7.68421e-33
lectin-24Db	1245.13	9.42493	0.763391	12.3462	5.10985e-35	1.03491e-31
CG4783	29464	11.3271	0.92927	12.1893	3.54489e-34	6.15394e-31
CG4950	1634.42	10.8099	0.901079	11.9967	3.69922e-33	5.61912e-30
CG11672	10119.9	9.31183	0.778385	11.963	5.55109e-33	7.49521e-30
CG34220	737243	11.3285	0.9543	11.871	1.67531e-32	2.03584e-29
CG31036	1386.89	-6.40975	0.541488	-11.8373	2.50436e-32	2.76663e-29
Ppn	17486.9	7.31856	0.640778	11.4214	3.27007e-30	3.31149e-27
Cpr47Ee	2434.65	-6.74886	0.601511	-11.2198	3.25905e-29	3.04646e-26
CG43673	42191.3	18.9275	1.70073	11.1291	9.05752e-29	7.86193e-26
Dh31	199827	-4.54602	0.410851	-11.0649	1.85675e-28	1.50422e-25
lectin-28C	899.811	9.37672	0.859906	10.9044	1.0987e-27	8.34459e-25
CG31077	74525.3	13.841	1.3091	10.5729	3.98077e-26	2.84555e-23
CG13936	149968	-12.6213	1.20034	-10.5148	7.38457e-26	4.98541e-23
CG6912	4004.18	-7.69331	0.739113	-10.4088	2.2596e-25	1.44519e-22
NtR	2805.6	7.59906	0.762115	9.97101	2.04133e-23	1.24031e-20
nAcRbeta-21C	1252.55	4.84464	0.487644	9.93479	2.938e-23	1.70012e-20
CG15545	607.002	-5.31936	0.53798	-9.88765	4.70933e-23	2.60126e-20
Ance-5	1058.08	7.53504	0.765391	9.84469	7.22594e-23	3.81781e-20
Pdh	3863.64	4.16688	0.424004	9.82744	8.5774e-23	4.34302e-20
CG34247	1310.71	-8.88186	0.9106	-9.75386	1.77593e-22	8.63245e-20
mthl8	3017.51	-14.9277	1.53759	-9.70854	2.77286e-22	1.29599e-19
Arr1	7522.53	5.56763	0.575411	9.67591	3.8168e-22	1.65649e-19
Amy-p	1945.36	6.71471	0.693832	9.67772	3.75e-22	1.65649e-19
CG1092	1496.24	4.35054	0.451763	9.63014	5.96471e-22	2.49942e-19
CG18302	4236.61	-5.5256	0.574269	-9.62197	6.45806e-22	2.61594e-19
Cht8	18908	8.94526	0.934368	9.57359	1.03255e-21	4.04759e-19
TwdlW	1409.21	-5.43873	0.576861	-9.42815	4.17378e-21	1.58499e-18
CG5506	18631.9	11.9666	1.28837	9.28815	1.57e-20	5.78139e-18
CG32633	1297.4	10.126	1.10255	9.18423	4.14476e-20	1.48139e-17
Kaz-m1	2771.86	11.4939	1.25648	9.14767	5.81747e-20	2.01983e-17
Amy-d	1051.74	6.4388	0.718485	8.96164	3.19877e-19	1.07976e-16
Arr2	9808.73	5.19451	0.582235	8.92168	4.59271e-19	1.5084e-16
Cht4	2189.41	10.6293	1.19345	8.90639	5.27216e-19	1.68598e-16
CG4259	892.211	10.9234	1.22856	8.89121	6.04472e-19	1.88347e-16
CG7214	3254.13	-15.0366	1.69457	-8.8734	7.09462e-19	2.15535e-16
CG9988	1031.64	10.1825	1.15112	8.84571	9.09507e-19	2.69569e-16
CG13321	6361.89	16.1981	1.83655	8.81984	1.14622e-18	3.31639e-16
CG7236	1371.45	-5.44363	0.623116	-8.73615	2.41182e-18	6.81591e-16
IFa	5698.9	6.60937	0.7568	8.73332	2.47305e-18	6.83011e-16
Pdfr	11946	-4.65467	0.539718	-8.62426	6.45083e-18	1.74201e-15
ninaC	1792.63	4.23979	0.492502	8.60868	7.3906e-18	1.9524e-15
CG5397	1164.77	4.38125	0.509956	8.59143	8.58934e-18	2.2208e-15
trpl	1575.99	5.49812	0.640817	8.57985	9.49976e-18	2.40502e-15
Sr-CI	1794.71	5.67337	0.662791	8.55981	1.1305e-17	2.80363e-15
Rh2	6104.24	6.61049	0.77491	8.53065	1.45534e-17	3.53705e-15
CG16965	226.815	6.76802	0.795832	8.50433	1.82647e-17	4.352e-15
CG34205	25468.2	12.7505	1.50064	8.49667	1.95114e-17	4.55966e-15
CG10725	548.79	8.26661	0.979797	8.43707	3.25398e-17	7.46082e-15
CG13285	25527.4	15.8257	1.88219	8.40813	4.16588e-17	9.37476e-15
CG13071	1414.45	-8.85478	1.05589	-8.38607	5.02678e-17	1.11064e-14
nimC1	270.576	7.16006	0.858382	8.34134	7.34505e-17	1.59388e-14
CG43134	22286.3	10.9316	1.33141	8.21052	2.20225e-16	4.69504e-14
CG5399	16602.3	8.84226	1.09593	8.06827	7.13014e-16	1.49389e-13
vanin-like	1228.41	12.3895	1.55639	7.96039	1.71495e-15	3.53222e-13
Cyp6g2	11248.8	5.97462	0.751957	7.94543	1.93523e-15	3.91949e-13
CG15865	908.218	9.91431	1.24922	7.9364	2.08133e-15	4.14628e-13
tgy	908.474	10.9116	1.37929	7.91099	2.55342e-15	5.0047e-13
Cyp6a2	7981.51	-3.83744	0.485512	-7.90389	2.70332e-15	5.2144e-13
CG18745	1092.96	13.6565	1.72892	7.89882	2.81561e-15	5.34613e-13
CG12934	1619.43	12.7741	1.62397	7.86596	3.66266e-15	6.84748e-13
CG42807	2734.45	5.12941	0.652427	7.86205	3.77912e-15	6.95816e-13
CG8888	705.873	4.97551	0.635905	7.82429	5.10512e-15	9.25932e-13
Hsp60B	83.2674	-23.3004	2.98594	-7.80337	6.02738e-15	1.07713e-12
mthl2	820.394	11.7978	1.5169	7.77754	7.39473e-15	1.30233e-12
CG10131	537.958	7.52684	0.976012	7.71184	1.24019e-14	2.15296e-12
CG15347	693.656	5.68725	0.738249	7.7037	1.32181e-14	2.26234e-12
CG13482	3591.86	10.0119	1.30011	7.70079	1.35224e-14	2.28228e-12
Cpr47Ea	772.367	-6.7917	0.886136	-7.6644	1.79667e-14	2.99084e-12
jhamt	11896	5.47943	0.723747	7.57092	3.70599e-14	6.08584e-12
nimB5	655.616	11.4829	1.5225	7.54212	4.62388e-14	7.49192e-12
CG8630	915.62	9.29249	1.24284	7.47684	7.61337e-14	1.21734e-11
nimB2	977.858	7.87214	1.05468	7.46403	8.39136e-14	1.32431e-11
Obp56h	1684.99	-4.39689	0.591761	-7.43018	1.08446e-13	1.68953e-11
CR40469	802.299	-4.26815	0.57605	-7.40934	1.26933e-13	1.95252e-11
Gbeta76C	1345.55	6.3334	0.85629	7.39633	1.40002e-13	2.12663e-11
CG18747	904.471	7.88324	1.07036	7.36501	1.77128e-13	2.65736e-11
CG6074	1281.95	6.32454	0.866541	7.2986	2.90784e-13	4.25735e-11
per	9931.53	-3.4178	0.46827	-7.29877	2.90415e-13	4.25735e-11
CG30046	165.068	7.90986	1.0854	7.28753	3.157e-13	4.54528e-11
CG4250	3620.95	4.31137	0.591687	7.28658	3.1793e-13	4.54528e-11
Karl	1045.07	4.11332	0.568186	7.23938	4.50747e-13	6.36917e-11
CG42262	1782.03	9.91515	1.37406	7.21595	5.35589e-13	7.48102e-11
CG4269	528.494	6.44461	0.893823	7.21016	5.58841e-13	7.71709e-11
Sdic3	269.956	9.22535	1.28135	7.19972	6.03379e-13	8.2385e-11
CG34331	586.796	11.3235	1.57601	7.18495	6.72301e-13	9.07756e-11
CG42565	1228.1	10.0098	1.39424	7.17944	6.99977e-13	9.34738e-11
LanA	938.748	3.45982	0.490069	7.05988	1.66652e-12	2.20126e-10
CG7669	191.981	-6.37923	0.904736	-7.05093	1.77732e-12	2.32236e-10
CG42821	724.084	5.3837	0.764965	7.03784	1.95242e-12	2.52402e-10
Fst	1191.12	9.09138	1.30021	6.99222	2.7057e-12	3.46101e-10
CG13054	25934.3	-6.52311	0.933246	-6.9897	2.75478e-12	3.48709e-10
TTLL3A	1537.33	-3.88804	0.558008	-6.96771	3.22149e-12	4.03583e-10
Acp1	391.296	-8.85435	1.2786	-6.92504	4.35847e-12	5.4045e-10
CG6071	603.072	-3.90713	0.56464	-6.91968	4.52659e-12	5.55627e-10
Idgf1	1689.76	5.32056	0.773006	6.88295	5.86255e-12	7.12417e-10
Bace	125.948	-6.04382	0.888293	-6.80386	1.01853e-11	1.22547e-09
CG13704	1099.56	12.2074	1.80588	6.75981	1.38174e-11	1.64616e-09
rtp	450.999	4.63227	0.687365	6.73918	1.59283e-11	1.87923e-09
ham	5746.83	-3.43699	0.512427	-6.70729	1.98278e-11	2.3168e-09
CG11400	1865.48	5.37874	0.80443	6.6864	2.28722e-11	2.64708e-09
CG7296	424.836	3.78843	0.566957	6.68205	2.35626e-11	2.70125e-09
eater	645.755	7.89492	1.1828	6.67479	2.47593e-11	2.81191e-09
CG15153	195.778	4.38336	0.657376	6.66796	2.59382e-11	2.91853e-09
lectin-37Db	470.301	12.4395	1.86662	6.66418	2.66153e-11	2.96724e-09
CG17777	14601.6	-5.1204	0.768828	-6.66001	2.7381e-11	3.02485e-09
CG13810	513.832	11.1141	1.68693	6.58835	4.44733e-11	4.86882e-09
pgant4	11399.9	5.95251	0.90678	6.56445	5.22244e-11	5.66635e-09
CG40467	521.675	3.60857	0.550392	6.55636	5.51362e-11	5.92934e-09
CG18746	433.106	12.3206	1.8901	6.51847	7.10289e-11	7.57143e-09
Mur29B	2335.95	5.63737	0.868756	6.48902	8.63967e-11	9.01512e-09
Sox21b	13500.4	-3.31648	0.511115	-6.48873	8.65656e-11	9.01512e-09
Ugt35b	2772.02	3.42333	0.527614	6.48832	8.6798e-11	9.01512e-09
CG15152	482.687	12.4771	1.94377	6.419	1.37176e-10	1.41268e-08
CG14131	289.946	5.60194	0.875844	6.39604	1.59454e-10	1.6283e-08
CG33494	987.677	6.384	1.00011	6.38331	1.73298e-10	1.75493e-08
CG34136	8234.37	-3.19367	0.501564	-6.36742	1.92239e-10	1.93065e-08
Cht9	6263.1	9.26246	1.4654	6.32075	2.60293e-10	2.59269e-08
CG42711	236.749	9.99965	1.58303	6.31679	2.67047e-10	2.63834e-08
Lk	1612.55	3.97	0.632571	6.27597	3.4745e-10	3.40501e-08
Dhc93AB	393.108	-3.72022	0.59533	-6.24899	4.13109e-10	4.01608e-08
CG13511	1172.27	12.293	1.97091	6.23721	4.45445e-10	4.29607e-08
Tsp29Fa	875.067	8.98397	1.4435	6.22376	4.85368e-10	4.64424e-08
CG8501	258.032	6.27115	1.00934	6.21313	5.194e-10	4.93106e-08
DAT	43253.6	4.97573	0.80208	6.20354	5.52075e-10	5.20064e-08
inaD	731.121	3.65208	0.591897	6.17012	6.8239e-10	6.33008e-08
CG13051	131.168	-8.17272	1.32435	-6.17111	6.78102e-10	6.33008e-08
CR34335	5154.17	4.27561	0.694029	6.16057	7.24855e-10	6.67306e-08
CG31463	132.653	-10.4204	1.69488	-6.14814	7.83946e-10	7.16279e-08
CG33099	697.562	7.47934	1.22366	6.11225	9.82354e-10	8.90863e-08
CG6234	342.021	6.75605	1.10621	6.10738	1.01278e-09	9.11651e-08
CG30151	1966.7	6.31443	1.03509	6.10038	1.05815e-09	9.45485e-08
CG18480	353.205	10.5705	1.73626	6.08807	1.14278e-09	1.01365e-07
CG15155	9164.88	10.5322	1.73301	6.0774	1.22145e-09	1.07558e-07
upd3	1515.17	11.6842	1.92622	6.06589	1.31226e-09	1.14724e-07
fau	255.024	4.13386	0.682242	6.05922	1.36783e-09	1.18728e-07
CG34437	195.066	9.71824	1.61112	6.03199	1.61952e-09	1.39577e-07
CG34388	1989.91	-7.49831	1.24379	-6.02859	1.65395e-09	1.41541e-07
Phae1	151.061	10.7995	1.80223	5.9923	2.06898e-09	1.7582e-07
CG3984	608.129	-7.66925	1.28305	-5.97738	2.26757e-09	1.91357e-07
Tep1	112.066	7.37993	1.23589	5.97135	2.35302e-09	1.96264e-07
Mmp2	30128.5	-3.45526	0.578673	-5.971	2.35801e-09	1.96264e-07
wbl	170.676	6.07306	1.02279	5.93776	2.88948e-09	2.38864e-07
CG4576	4110.52	8.01228	1.35148	5.92852	3.05668e-09	2.50978e-07
CG4757	21568.1	5.48973	0.926256	5.9268	3.08896e-09	2.51927e-07
CG10650	1051.16	5.51366	0.934539	5.89987	3.6378e-09	2.94711e-07
CG9747	5805.38	7.71993	1.30877	5.89861	3.66583e-09	2.95015e-07
Spn77Bc	198.231	-8.59721	1.45925	-5.89152	3.8266e-09	3.05926e-07
drm	6480.62	6.80954	1.15882	5.87625	4.19652e-09	3.33308e-07
Cyp4p2	3306.7	-2.71716	0.462909	-5.86976	4.36426e-09	3.4438e-07
npf	37318.4	-4.85276	0.829365	-5.85118	4.88107e-09	3.82676e-07
Myo61F	350.805	6.32721	1.08466	5.83335	5.43255e-09	4.23182e-07
Trissin	517.635	3.29175	0.567579	5.79963	6.64624e-09	5.14427e-07
Cyp6a8	1544.26	-4.69937	0.813407	-5.7774	7.5866e-09	5.83496e-07
CG33958	507.87	3.08572	0.534303	5.77522	7.68508e-09	5.87353e-07
Lsp1gamma	347.79	4.87046	0.846082	5.75649	8.5879e-09	6.52251e-07
NepYr	2097.92	-2.74441	0.478635	-5.73384	9.81841e-09	7.41076e-07
Obp83cd	120.611	4.95462	0.864625	5.73036	1.00215e-08	7.51739e-07
ect	99.2394	6.4306	1.12266	5.728	1.01621e-08	7.57604e-07
CG34452	601.982	5.24949	0.916634	5.72693	1.02267e-08	7.57772e-07
CG18748	150.677	10.7959	1.88961	5.71331	1.10797e-08	8.16003e-07
net	718.123	-3.25668	0.571039	-5.70308	1.17662e-08	8.6134e-07
nimB1	211.82	6.59951	1.17423	5.62027	1.9066e-08	1.38737e-06
Cyp6w1	4274.32	-3.60431	0.641758	-5.61631	1.95076e-08	1.4027e-06
CG15923	159.539	-4.05204	0.721352	-5.61728	1.93987e-08	1.4027e-06
decay	363.142	6.22902	1.11127	5.6053	2.07897e-08	1.4861e-06
Hmgs	11817.6	2.90045	0.517712	5.60244	2.11359e-08	1.50201e-06
tim	48132.3	-3.11899	0.558411	-5.58547	2.33071e-08	1.64667e-06
Mec2	414.56	3.92331	0.70389	5.57375	2.49318e-08	1.75128e-06
CG5819	253.496	10.1174	1.82029	5.5581	2.72725e-08	1.90469e-06
sv	1991.84	2.80707	0.505294	5.55531	2.77112e-08	1.92426e-06
retn	4030.61	5.91629	1.06537	5.55325	2.80413e-08	1.93612e-06
CG13806	242.105	11.4811	2.0704	5.54539	2.93303e-08	2.01368e-06
wg	238.178	8.44698	1.52428	5.5416	2.99715e-08	2.03781e-06
CG14324	101.999	-10.0405	1.81192	-5.54134	3.00171e-08	2.03781e-06
sut4	92.3726	-5.39962	0.975199	-5.53695	3.07791e-08	2.07793e-06
CG14125	936.04	8.12887	1.47211	5.5219	3.35346e-08	2.25145e-06
TrpA1	3040.89	-2.52848	0.458711	-5.51215	3.54485e-08	2.36687e-06
CG10157	262.515	3.13486	0.569468	5.50489	3.69393e-08	2.45293e-06
CG6753	79.096	9.87126	1.79675	5.49396	3.93021e-08	2.59565e-06
ple	35175.8	3.5064	0.641209	5.46843	4.54044e-08	2.98246e-06
CG34236	236.533	9.98718	1.82789	5.46377	4.66119e-08	3.02978e-06
CG12974	350.213	8.32873	1.52437	5.46373	4.66235e-08	3.02978e-06
srp	398.664	4.80895	0.881269	5.45685	4.84651e-08	3.11612e-06
Dhc98D	373.43	-3.65736	0.670173	-5.45734	4.83329e-08	3.11612e-06
CG42715	134.079	9.17256	1.68122	5.45589	4.87294e-08	3.11663e-06
CG14636	219.453	11.3393	2.0818	5.44689	5.12582e-08	3.2612e-06
pdm3	23782.7	-2.59541	0.476916	-5.44206	5.26689e-08	3.3335e-06
CS-2	305.702	6.35881	1.16935	5.43789	5.39163e-08	3.37727e-06
et	177.705	5.24805	0.964985	5.43848	5.37373e-08	3.37727e-06
CG4927	383.08	5.06033	0.933785	5.41916	5.98795e-08	3.71253e-06
D	12224.5	-2.3199	0.428087	-5.41921	5.98613e-08	3.71253e-06
VGlut	104384	-2.20288	0.407441	-5.40663	6.42201e-08	3.96144e-06
CG14572	104.286	8.8308	1.63569	5.39883	6.70753e-08	4.11666e-06
CG13203	2087.89	-2.96165	0.548665	-5.39791	6.74201e-08	4.11703e-06
CG10178	3134.58	-2.4367	0.453644	-5.37139	7.81304e-08	4.7472e-06
Cyp311a1	2144.94	-2.93935	0.548522	-5.35866	8.384e-08	5.06878e-06
Gr89a	202.345	11.2222	2.10085	5.34174	9.20606e-08	5.53822e-06
Rx	900.905	2.74879	0.516318	5.32384	1.016e-07	6.08196e-06
t	374.368	4.16275	0.7832	5.31505	1.06628e-07	6.3517e-06
CG8568	287.98	-3.77785	0.713111	-5.2977	1.17273e-07	6.95173e-06
Cyp6d2	711.948	4.71699	0.891094	5.29349	1.20006e-07	7.07921e-06
CG13247	1000.18	-5.75736	1.08925	-5.28563	1.25274e-07	7.35427e-06
CG14629	1201.64	6.4446	1.22133	5.27673	1.3151e-07	7.68321e-06
CG43338	593.309	-5.90661	1.12087	-5.26965	1.36682e-07	7.9472e-06
CG3884	2660.76	7.99481	1.52239	5.25149	1.5087e-07	8.73032e-06
CG6652	368.153	-3.06817	0.584798	-5.24654	1.54984e-07	8.92588e-06
CG11029	14107.2	6.66301	1.27304	5.23393	1.65947e-07	9.46754e-06
CG18088	371.929	5.78224	1.10462	5.2346	1.65338e-07	9.46754e-06
lush	166.424	10.9399	2.09054	5.23304	1.66743e-07	9.46852e-06
CG15082	4699.8	5.08537	0.973593	5.2233	1.75758e-07	9.93399e-06
CecC	143.295	9.26447	1.77398	5.22243	1.76587e-07	9.93463e-06
Osi4	195.866	-3.35728	0.64397	-5.21341	1.85402e-07	1.03825e-05
Adgf-A	127.604	5.10927	0.980977	5.20835	1.90527e-07	1.06206e-05
Muc14A	382.561	-3.07838	0.591537	-5.20404	1.94999e-07	1.08202e-05
LanB1	1910.27	3.70576	0.715442	5.17968	2.22271e-07	1.22774e-05
CG8172	391.053	24.685	4.7849	5.15893	2.48362e-07	1.36565e-05
cry	27623.4	-3.14518	0.610411	-5.15256	2.56951e-07	1.40652e-05
CG16884	405.38	-5.69025	1.10464	-5.15124	2.58769e-07	1.41012e-05
CG2663	131.086	9.1356	1.77385	5.15015	2.60281e-07	1.41203e-05
CG34288	268.531	8.52496	1.65763	5.14287	2.70568e-07	1.46131e-05
bsh	1571.13	3.34119	0.651191	5.13089	2.88378e-07	1.55061e-05
CG13283	161.749	5.08093	0.99408	5.11119	3.20141e-07	1.71381e-05
CG10560	2689.63	-2.31609	0.454031	-5.10117	3.3756e-07	1.79914e-05
CG1136	558.485	4.24505	0.83391	5.09053	3.57056e-07	1.89474e-05
CG6959	8784.75	-2.42575	0.477157	-5.08376	3.70041e-07	1.9551e-05
dy	156.958	-3.45669	0.680069	-5.08285	3.71812e-07	1.95596e-05
CR43415	79.3702	-5.42428	1.07208	-5.05957	4.20207e-07	2.20101e-05
CG12493	586.234	6.19684	1.22738	5.04885	4.44484e-07	2.31818e-05
alphaTub85E	435.253	-6.72452	1.33735	-5.02823	4.95019e-07	2.57062e-05
CG2556	1504.82	4.51283	0.897642	5.02742	4.97117e-07	2.57062e-05
CG15080	320.543	-2.89432	0.576399	-5.02138	5.13025e-07	2.63721e-05
Efhc1.2	965.377	-2.36329	0.470692	-5.02089	5.14334e-07	2.63721e-05
He	56.9342	9.39093	1.87103	5.01913	5.19062e-07	2.65027e-05
CG11425	905.527	-4.01605	0.800778	-5.01519	5.29816e-07	2.69386e-05
Rab9E	50.8238	9.23107	1.84241	5.01033	5.43357e-07	2.74027e-05
CR40677	8916.34	-4.31259	0.860744	-5.0103	5.43453e-07	2.74027e-05
CG7194	141.143	5.34779	1.07142	4.9913	5.99756e-07	3.01167e-05
CG12239	33222.2	3.75386	0.754414	4.97586	6.49576e-07	3.24841e-05
CG7179	370.464	8.56174	1.72172	4.97278	6.60012e-07	3.28708e-05
sad	4584.97	6.46764	1.30556	4.95394	7.27267e-07	3.60724e-05
CG30083	474.499	8.32368	1.68057	4.9529	7.31167e-07	3.61185e-05
CG5391	61.9264	-9.32046	1.88217	-4.95199	7.34596e-07	3.6141e-05
CG5849	173.704	5.82186	1.1774	4.94467	7.62733e-07	3.73739e-05
Obp99d	162.871	23.5914	4.78512	4.93015	8.21654e-07	4.00994e-05
retinin	2695.85	4.73965	0.961734	4.92824	8.29756e-07	4.01721e-05
Rfx	17086.1	-2.84594	0.577423	-4.9287	8.27788e-07	4.01721e-05
nimB3	86.693	8.53905	1.73328	4.92653	8.3704e-07	4.03639e-05
CG18577	48.8662	9.17207	1.86273	4.924	8.47938e-07	4.07278e-05
CG31954	291.845	-3.00317	0.611643	-4.91001	9.10711e-07	4.33998e-05
CG14160	181.498	9.59915	1.95483	4.91048	9.08542e-07	4.33998e-05
GstS1	17100.1	4.59579	0.937951	4.89982	9.59267e-07	4.55352e-05
Tdc1	8779.45	6.97761	1.42926	4.88199	1.05022e-06	4.96585e-05
Phk-3	73296.2	7.39799	1.51924	4.86954	1.11857e-06	5.26855e-05
yellow-g	99.4625	8.73493	1.79605	4.86341	1.15381e-06	5.41354e-05
Tsp42Ec	804.791	6.29645	1.29576	4.85926	1.17827e-06	5.50703e-05
Kal1	545.573	-2.42827	0.499806	-4.85842	1.18323e-06	5.50906e-05
Ir76a	1848.23	2.23918	0.461057	4.85663	1.194e-06	5.53799e-05
CG3964	110.925	-4.00971	0.828067	-4.84226	1.28372e-06	5.93147e-05
CG13510	2557.98	6.97507	1.44399	4.83042	1.36248e-06	6.27152e-05
Ugt36Bb	49.326	-8.99253	1.86285	-4.8273	1.38399e-06	6.34652e-05
Vmat	130845	3.24899	0.675537	4.80949	1.51317e-06	6.91282e-05
CG30411	447.761	5.08268	1.05786	4.8047	1.54983e-06	7.05378e-05
Asph	1215.75	2.18119	0.455063	4.79316	1.64173e-06	7.44415e-05
y	70.8594	7.30157	1.52466	4.78897	1.67642e-06	7.57316e-05
CR43432	168.769	6.25387	1.30934	4.77637	1.78491e-06	8.03343e-05
CG5964	218.824	-3.03973	0.636661	-4.77449	1.80165e-06	8.07883e-05
CG13315	856.839	4.95201	1.0376	4.77257	1.81886e-06	8.12605e-05
CG34187	594.343	-2.73518	0.573238	-4.77145	1.82904e-06	8.14159e-05
CG32668	183.087	-3.00645	0.632097	-4.75631	1.97162e-06	8.74423e-05
CG12836	338.352	2.89337	0.608702	4.75334	2.0008e-06	8.84134e-05
Ance-3	111.094	-3.55458	0.74921	-4.74444	2.09083e-06	9.20573e-05
CG5773	219.799	4.55671	0.960931	4.74197	2.11646e-06	9.2849e-05
CG43689	10422.6	-2.07576	0.437845	-4.74085	2.12828e-06	9.3032e-05
Che-13	284.027	-3.54803	0.751661	-4.72025	2.35559e-06	0.000102599
betaTub60D	1237.15	4.22445	0.896359	4.7129	2.44216e-06	0.00010599
Rh4	973.136	6.38057	1.35519	4.70823	2.49873e-06	0.000108059
CG42566	403.608	4.30541	0.914774	4.70653	2.51975e-06	0.000108581
Cht2	1346.35	3.24291	0.689779	4.70137	2.58424e-06	0.000110967
CG1894	49.679	-9.00369	1.92019	-4.68895	2.74611e-06	0.000117503
Elp2	1392.4	2.28649	0.488072	4.68475	2.80305e-06	0.000119518
CG32751	93.4198	5.88923	1.25744	4.6835	2.82023e-06	0.00011983
nimC2	113.517	3.36602	0.719136	4.68065	2.85971e-06	0.000121084
Cpr76Bd	57.0054	-7.8463	1.68396	-4.65944	3.17065e-06	0.000133784
ninaD	288.182	5.49619	1.19121	4.61397	3.95056e-06	0.000164973
CG14331	171.492	5.91739	1.28239	4.61434	3.94353e-06	0.000164973
Tbh	7968.8	-2.58365	0.55993	-4.61424	3.9454e-06	0.000164973
CG10799	288.839	4.47845	0.971289	4.61083	4.01064e-06	0.000166909
CG11835	559.067	-2.36133	0.512688	-4.60578	4.10925e-06	0.000170429
Ast-C	341745	-2.1921	0.476335	-4.602	4.18443e-06	0.000172491
CG15695	416.355	2.78471	0.605126	4.60186	4.18736e-06	0.000172491
Gsc	1111	-4.12068	0.895633	-4.60085	4.2077e-06	0.000172743
CG11458	574.395	8.66064	1.88478	4.59504	4.32669e-06	0.00017703
CG10175	2624.11	6.13408	1.33567	4.59252	4.37926e-06	0.00017858
Skeletor	1721.79	5.40178	1.17666	4.59076	4.4163e-06	0.000179488
CG10300	75.3197	8.33101	1.82122	4.57442	4.77545e-06	0.000193438
CG42822	103.944	5.40437	1.18207	4.57195	4.8321e-06	0.000195082
CG1809	659.087	-2.44625	0.535876	-4.56495	4.99604e-06	0.000201033
CR44185	41.9783	8.951	1.96143	4.5635	5.03071e-06	0.00020176
CG7742	166.333	-6.50743	1.42904	-4.55369	5.27126e-06	0.000210712
CG34045	392.082	3.85609	0.849407	4.53974	5.63236e-06	0.000223675
CG6789	166.606	2.99169	0.658963	4.54	5.62544e-06	0.000223675
CG7777	730.107	4.28495	0.944456	4.53695	5.70743e-06	0.000225918
CG31300	935.995	2.53507	0.558892	4.53589	5.7362e-06	0.000226319
CG1571	75.1425	-3.92409	0.866074	-4.53089	5.87355e-06	0.000230988
fd102C	1778.62	3.42177	0.755628	4.52838	5.94385e-06	0.000232999
Mtk	502.354	4.12235	0.910852	4.52581	6.01633e-06	0.000235082
TpnC41C	544.546	7.54247	1.66882	4.51964	6.19456e-06	0.000241246
Edg91	74.4452	7.28012	1.61101	4.51898	6.21379e-06	0.000241246
Osi17	262.781	6.74703	1.49865	4.50209	6.72899e-06	0.000260416
Cyp4aa1	3586.11	5.8106	1.29116	4.50029	6.78612e-06	0.000261793
CG42369	529.989	5.30693	1.1795	4.49932	6.81712e-06	0.000262157
CG42867	47.4643	9.12725	2.03114	4.49366	7.00103e-06	0.00026838
CG43672	116.617	6.34927	1.41759	4.47893	7.50186e-06	0.000286675
CR34044	112.904	6.24649	1.3963	4.47359	7.69169e-06	0.000293008
CG5130	553.821	2.61126	0.584243	4.46948	7.84101e-06	0.000297762
CG15550	36.9917	8.77401	1.96342	4.46875	7.86798e-06	0.000297856
Tektin-C	3342.68	3.85451	0.864077	4.46084	8.16388e-06	0.000308098
CG18635	379.775	5.3437	1.20151	4.44748	8.68823e-06	0.000325862
Osi24	5448.42	6.49975	1.46133	4.44783	8.67433e-06	0.000325862
lectin-37Da	108.722	7.81415	1.7581	4.44465	8.80362e-06	0.000329174
Obp56a	221.607	3.8747	0.872249	4.44219	8.90469e-06	0.000329908
CG33288	229.849	-3.88603	0.874751	-4.44244	8.89425e-06	0.000329908
HP1D3csd	159.744	5.32349	1.19823	4.44281	8.87922e-06	0.000329908
CG12309	217.603	-3.66714	0.826646	-4.43616	9.15758e-06	0.000338246
Sclp	562.573	4.68725	1.06283	4.41017	1.03292e-05	0.000380364
CG14082	1287.06	-2.77923	0.632945	-4.39095	1.12855e-05	0.000414323
Cpr72Ec	80.315	5.2846	1.20409	4.38889	1.1393e-05	0.000417012
CG10581	419.966	2.27742	0.519203	4.38638	1.15255e-05	0.000420595
Pdp1	141044	-1.86273	0.425958	-4.37302	1.22537e-05	0.000444944
CR44106	105.92	8.85949	2.02604	4.37281	1.2266e-05	0.000444944
Tpc1	3055.45	1.94613	0.445259	4.37078	1.23803e-05	0.000447755
beat-Ia	12405.6	-2.15382	0.493109	-4.36785	1.25477e-05	0.00045246
CG10359	308.948	2.74005	0.629799	4.35068	1.35717e-05	0.000486499
CG9717	447.143	5.11034	1.17447	4.3512	1.35397e-05	0.000486499
CG30026	1140.16	4.55252	1.04924	4.33889	1.43206e-05	0.000510333
LanB2	807.202	3.14512	0.724827	4.33913	1.43051e-05	0.000510333
Femcoat	124.094	9.04398	2.08702	4.33345	1.46794e-05	0.00052159
CG33460	83.8424	8.48073	1.95854	4.33012	1.49025e-05	0.000527973
obst-H	78.878	9.8617	2.27782	4.32946	1.49478e-05	0.000528038
Tsp42Ed	5262.98	3.70081	0.857267	4.31698	1.58177e-05	0.00055715
Mlc1	704.261	5.31703	1.23267	4.31341	1.60756e-05	0.000564597
CG9095	1793.32	5.93054	1.37598	4.31006	1.63213e-05	0.000571574
GNBP2	1300.67	-2.67536	0.621418	-4.30525	1.66797e-05	0.000582447
Wnt6	302.224	4.0126	0.932643	4.3024	1.68956e-05	0.000588297
proPO-A1	5598.57	7.11075	1.65454	4.29771	1.72572e-05	0.000599171
CG7142	364.741	5.66341	1.32079	4.28791	1.80362e-05	0.000624432
CG3097	29044	5.48323	1.27993	4.284	1.83565e-05	0.000633718
CG9465	65.6644	-4.75744	1.11252	-4.27628	1.90042e-05	0.000654218
CG13822	189.421	-2.85552	0.670453	-4.25909	2.05258e-05	0.000704602
CG10031	913.569	-2.9078	0.6854	-4.24249	2.21057e-05	0.000756699
Fmrf	1588.99	4.90437	1.16004	4.22776	2.36032e-05	0.000804186
opm	1727.95	2.26615	0.536044	4.22755	2.36253e-05	0.000804186
CG10086	110.314	8.92005	2.11286	4.22179	2.42366e-05	0.000822689
mthl3	63.7351	8.08462	1.91768	4.21583	2.48859e-05	0.000840036
Ssk	2583.88	3.94959	0.93673	4.21635	2.48284e-05	0.000840036
CR44017	490.844	2.78166	0.660631	4.21061	2.54677e-05	0.000857297
CG6059	55.193	-4.33855	1.03282	-4.20069	2.66104e-05	0.000893286
CG9317	246.24	2.84704	0.679691	4.18872	2.80535e-05	0.000939134
CG14142	386.201	2.65541	0.635808	4.17644	2.96107e-05	0.000988543
Tsp42Eo	466.049	-4.45722	1.06799	-4.17346	3.00008e-05	0.000998822
CG13077	410.862	4.222	1.01485	4.16024	3.17917e-05	0.00105555
ppk29	378.197	2.1725	0.523557	4.14951	3.33191e-05	0.00110325
CG4781	217.129	5.30187	1.27796	4.1487	3.34365e-05	0.00110413
CG33914	564.754	2.24861	0.543102	4.1403	3.46845e-05	0.00114224
fa2h	138.019	5.76487	1.39422	4.13483	3.5521e-05	0.00116348
GATAe	165.313	4.24489	1.02651	4.13525	3.54572e-05	0.00116348
CG13360	119.478	4.16858	1.01165	4.12057	3.77933e-05	0.00123458
nimB4	495.535	5.87905	1.42934	4.11314	3.9032e-05	0.00126823
CG32037	104.018	4.0567	0.986237	4.11332	3.90016e-05	0.00126823
CG33509	82.9793	5.58893	1.35998	4.10957	3.964e-05	0.00128455
CG18557	53.2228	7.82363	1.90473	4.10747	4.00022e-05	0.00128941
CG14692	405.981	-3.23245	0.786855	-4.10807	3.98986e-05	0.00128941
CG10841	93.6125	-4.15586	1.01286	-4.10309	4.07669e-05	0.00131058
CG30178	181.392	-2.63537	0.643916	-4.09273	4.26329e-05	0.00136695
odd	2927.84	4.9495	1.21311	4.08001	4.50347e-05	0.00144016
CG14495	47.8182	9.13808	2.24083	4.078	4.54256e-05	0.00144885
CG11671	269.172	3.92823	0.963626	4.07651	4.57169e-05	0.00145432
Osi9	308.736	6.2592	1.53574	4.07569	4.58782e-05	0.00145564
nemy	1133.52	1.99424	0.489651	4.07278	4.64554e-05	0.00147012
CG14691	44.2705	-6.11849	1.50849	-4.05605	4.99093e-05	0.00157532
CG7409	2305.86	-2.26876	0.559755	-4.05312	5.05389e-05	0.00159106
CG2975	73.271	8.28206	2.04376	4.05237	5.07019e-05	0.00159207
nmdyn-D7	180.27	-3.47271	0.85713	-4.05156	5.08777e-05	0.00159347
Drip	677.159	2.69703	0.667119	4.04281	5.28151e-05	0.0016499
osk	236.049	-5.51157	1.36397	-4.04083	5.32613e-05	0.00165957
Oatp33Eb	794.313	3.41939	0.846923	4.03743	5.40409e-05	0.00167955
CG31288	147.477	5.55696	1.37665	4.03657	5.42388e-05	0.0016814
chp	961.592	2.90275	0.721146	4.0252	5.69271e-05	0.00176025
CG32235	64.125	-4.44904	1.10642	-4.02112	5.79224e-05	0.0017846
ninaE	19804.2	2.60617	0.648176	4.02077	5.80085e-05	0.0017846
ZnT35C	431.154	-3.02853	0.753883	-4.01724	5.88839e-05	0.00179338
sqa	381.776	3.35199	0.83404	4.01898	5.84511e-05	0.00179338
Act88F	1554.26	6.00633	1.49484	4.01805	5.86825e-05	0.00179338
CG15745	1038.25	2.59023	0.64474	4.01749	5.88217e-05	0.00179338
CG43400	66.659	-3.622	0.90228	-4.01427	5.96297e-05	0.00181155
CG5172	312.531	7.09246	1.76876	4.00985	6.07583e-05	0.00184123
CG2016	26721.5	1.66587	0.41588	4.00564	6.18491e-05	0.00186499
CG11693	147.202	6.96545	1.73873	4.00606	6.17399e-05	0.00186499
fat-spondin	1122.18	1.99746	0.500781	3.98869	6.64383e-05	0.00199841
AQP	176.83	6.89259	1.72929	3.98578	6.72583e-05	0.00201808
CG43373	3485.84	-2.22288	0.557849	-3.98473	6.75571e-05	0.00202205
Tsp42En	1186.81	-2.25995	0.567407	-3.98294	6.80668e-05	0.0020323
CG8046	255.293	4.48035	1.12505	3.98236	6.82353e-05	0.00203234
Cyp4p3	497.905	-3.01322	0.75708	-3.98005	6.89003e-05	0.00204713
Apc7	38.7565	7.36743	1.8538	3.97423	7.06066e-05	0.00209271
CG6357	3736.16	2.04471	0.514892	3.97114	7.153e-05	0.00211492
Mct1	1895.36	-2.16036	0.544857	-3.965	7.3397e-05	0.00216485
Magi	1658.8	-1.96573	0.496391	-3.96004	7.49387e-05	0.00220498
Spn88Eb	41.5741	5.90373	1.49146	3.95836	7.54673e-05	0.00221517
CG42571	38.292	8.81689	2.23008	3.95362	7.6977e-05	0.00224862
Sgs5	10001.1	15.3141	3.87313	3.95393	7.68785e-05	0.00224862
CG12963	186.875	3.8673	0.979072	3.94997	7.81614e-05	0.00227774
ninaA	182.109	2.48127	0.629158	3.9438	8.0202e-05	0.00232372
Cpr49Ac	84.3959	8.53308	2.16354	3.94404	8.01195e-05	0.00232372
Cpr65Az	116.909	3.54916	0.900011	3.94346	8.0313e-05	0.00232372
CG17278	985.696	2.03141	0.51554	3.94036	8.136e-05	0.00234843
Arpc3B	293.712	3.25695	0.828229	3.93243	8.40917e-05	0.00242152
CG5322	394.047	2.28891	0.582205	3.93145	8.44367e-05	0.00242571
Ptp52F	384.792	4.90095	1.2469	3.9305	8.47682e-05	0.00242949
Hsp60C	140.625	-6.53839	1.66419	-3.92886	8.53486e-05	0.00243464
CG15043	446.525	5.01661	1.2767	3.92935	8.51764e-05	0.00243464
CG42261	8475.95	-1.79456	0.457062	-3.9263	8.6264e-05	0.00245499
dve	2605.42	2.78411	0.710473	3.91867	8.90406e-05	0.00252809
CG17672	37.3059	8.77919	2.24238	3.91513	9.03549e-05	0.00255942
sgl	9852.68	3.16562	0.808856	3.9137	9.08927e-05	0.00256867
CG14191	1441.04	7.49894	1.92026	3.90518	9.41558e-05	0.00265471
CG13375	1823.25	-2.04053	0.523584	-3.89724	9.72957e-05	0.00273689
yin	1817.67	3.1844	0.817711	3.89428	9.84893e-05	0.00276407
cu	9418.09	2.64766	0.680518	3.89066	9.99718e-05	0.00279921
CG4702	99.1228	4.28114	1.10174	3.88579	0.000101997	0.00284934
AttD	38.1814	7.37799	1.90274	3.87756	0.000105508	0.00294068
CG12278	208.033	-2.40131	0.619464	-3.87643	0.000106	0.00294763
Idgf5	212.533	-2.93439	0.757624	-3.87315	0.000107437	0.00298075
CG14760	193.681	-5.04755	1.30384	-3.87129	0.000108261	0.00299679
CG3280	710.013	-2.1702	0.561308	-3.86632	0.000110489	0.00305151
CG1946	36.1224	-7.0069	1.81264	-3.86557	0.000110828	0.00305393
CG34172	274.25	5.72039	1.48046	3.86393	0.000111577	0.0030676
S-Lap2	154.056	-4.63001	1.20047	-3.85682	0.000114873	0.00315111
Scp1	849.92	3.84416	0.997937	3.85211	0.000117104	0.00320506
CG6888	26.959	-8.12168	2.10893	-3.8511	0.000117591	0.00321115
ttm2	127.114	-2.85387	0.741704	-3.84772	0.000119221	0.00324837
CG31689	2006.74	3.02575	0.786674	3.84626	0.000119935	0.00326051
pdm2	1372.98	2.81629	0.733309	3.84053	0.00012277	0.0033229
caup	1518.73	2.60193	0.677593	3.83997	0.00012305	0.0033229
CG15537	37097.5	-2.1361	0.556227	-3.84034	0.000122864	0.0033229
CG43139	55.4779	9.35352	2.43671	3.83859	0.000123745	0.00333426
CG3308	10687.5	1.73195	0.451495	3.83604	0.000125035	0.00336157
CG30148	78.9862	5.31362	1.38756	3.82946	0.000128427	0.00344513
CG4415	65.0389	-5.05132	1.32023	-3.82609	0.000130193	0.00348299
CG9505	39.6718	7.40635	1.93596	3.82568	0.000130411	0.00348299
Cyp6a17	1131.25	3.3899	0.886347	3.82457	0.000130999	0.00349101
Tsp2A	623.151	3.31644	0.867894	3.82125	0.000132777	0.00353065
RhoGAP102A	2313.16	1.68586	0.441558	3.81799	0.000134546	0.00356987
CG42820	52.1487	-7.73608	2.03028	-3.81036	0.000138765	0.0036738
Chd3	25.6028	-8.04663	2.11283	-3.80845	0.000139839	0.00369417
KFase	922.004	-1.71983	0.451684	-3.8076	0.00014032	0.00369885
cbt	11118	-1.70417	0.447657	-3.80687	0.000140737	0.0037018
CG8916	2568.97	1.64844	0.433108	3.80607	0.000141191	0.00370573
CG1561	264.092	2.85599	0.751056	3.80263	0.000143171	0.00374959
CG42319	334.856	2.23718	0.588988	3.79835	0.000145662	0.00379941
CG18268	255.368	3.30889	0.87123	3.79795	0.000145896	0.00379941
rdhB	501.726	1.88583	0.496564	3.79776	0.000146011	0.00379941
pr	4190.29	-1.64739	0.434427	-3.79209	0.000149385	0.00387889
Cyp6a22	198.804	5.23227	1.38019	3.79097	0.000150059	0.00388809
CG7267	9586.63	4.12846	1.08971	3.78858	0.000151514	0.00391743
kermit	1246.25	3.87132	1.02219	3.78727	0.000152309	0.00392963
gcm	55.5739	3.56072	0.944358	3.77052	0.000162908	0.00418907
Phae2	47.6853	7.70236	2.04291	3.7703	0.000163054	0.00418907
Zasp52	2226.93	2.98243	0.792709	3.76233	0.000168338	0.00431569
CG10970	2056.06	4.08342	1.08942	3.74826	0.000178068	0.00455555
Sodh-1	178.121	2.30726	0.616608	3.74185	0.000182669	0.00466342
ru	1455.89	-1.93057	0.5161	-3.74069	0.000183515	0.00467521
CG31244	33.8355	-6.28538	1.68065	-3.73985	0.000184133	0.00467899
CG31028	227.041	5.35834	1.43293	3.73944	0.000184433	0.00467899
lok	277.641	2.71646	0.726603	3.73858	0.000185066	0.00468524
Obp83ef	35.1593	7.23073	1.9354	3.73604	0.000186937	0.00472279
CG1288	32.6139	-8.39682	2.24938	-3.73294	0.000189255	0.00477143
CR43460	113.414	2.91671	0.782668	3.72663	0.000194059	0.00488241
CG18249	89.5948	3.70889	0.995611	3.72524	0.00019513	0.00489921
Pig1	82.5148	2.87446	0.771806	3.72432	0.00019584	0.0049069
Cyp305a1	1796.7	-1.71583	0.461381	-3.7189	0.000200094	0.00500317
CG3770	1168.54	4.01839	1.0807	3.71831	0.000200558	0.00500448
CG13559	68.7356	6.54019	1.76053	3.7149	0.000203287	0.00506219
CG18449	49.3442	-5.13636	1.38358	-3.71236	0.000205336	0.00510274
Obp19c	175.588	5.24398	1.41366	3.70951	0.000207662	0.00515002
CR42839	81.4447	8.42736	2.273	3.70759	0.000209243	0.00517866
CG9780	1439.3	-1.76709	0.476993	-3.70464	0.000211689	0.00522854
CG6426	1220.76	1.80109	0.486444	3.70256	0.000213434	0.00526094
Tsp42Eh	998.922	5.14533	1.39075	3.69967	0.000215877	0.00531039
Tsf1	25400.6	1.71891	0.465452	3.69299	0.000221632	0.00544095
vas	94.2308	-2.85945	0.775304	-3.68817	0.000225877	0.00552284
CG14985	442.721	2.03811	0.552548	3.68856	0.000225529	0.00552284
p38c	278.963	4.43057	1.20168	3.68698	0.000226934	0.00553756
CG8852	85.9538	-3.82174	1.03684	-3.68595	0.000227849	0.00553765
CG31004	1976.36	4.04707	1.09797	3.68597	0.000227836	0.00553765
Gad1	60811.6	1.50831	0.410463	3.67466	0.000238168	0.00577687
heix	2532.73	1.70428	0.464465	3.66933	0.000243185	0.00588682
pgant8	162.391	3.84499	1.0493	3.66432	0.000247996	0.00599135
CG18744	273.151	4.16654	1.13723	3.66376	0.000248541	0.0059926
CG13488	24.6469	8.18135	2.23358	3.66289	0.000249387	0.00600109
slo	123809	-1.62637	0.444523	-3.65869	0.00025351	0.00608825
CG13053	853.448	1.88659	0.517274	3.64718	0.000265133	0.00635483
CG5162	5410.3	-2.2859	0.627229	-3.64445	0.000267969	0.00641016
CG5157	93.9378	3.15724	0.867231	3.6406	0.000271999	0.00649377
CG14752	31.8665	8.55153	2.35283	3.63457	0.00027844	0.00663451
Est-6	4143.3	4.2924	1.1821	3.63116	0.000282154	0.00670984
CG5830	15890.3	1.49567	0.412043	3.62988	0.000283553	0.00671683
CG13067	193.577	4.69399	1.29307	3.6301	0.00028331	0.00671683
nimC4	278.187	2.45472	0.676733	3.62732	0.000286383	0.00677067
Dro	559.719	4.9885	1.37657	3.62387	0.000290228	0.00684826
GRHRII	2686.84	-1.67962	0.463555	-3.62336	0.000290805	0.00684857
CR43723	43.2755	3.99314	1.1031	3.61992	0.000294693	0.00692234
CG3014	433.378	1.91207	0.528347	3.61896	0.00029579	0.00692234
CG14855	125.549	2.5313	0.699526	3.61859	0.000296216	0.00692234
CBP	1885.79	-1.69586	0.468526	-3.61957	0.000295098	0.00692234
CG9411	1550.61	5.44555	1.50578	3.61642	0.000298701	0.00696702
tnc	2925.03	-1.67517	0.463371	-3.61518	0.000300144	0.00698725
amd	1606.22	3.88185	1.07404	3.61426	0.000301203	0.00699647
CG14857	89.314	2.97478	0.823163	3.61384	0.000301691	0.00699647
nompB	1251.21	-2.82612	0.782293	-3.61261	0.000303132	0.00701649
CG31862	74.9372	-3.22814	0.894089	-3.61054	0.000305563	0.00705931
CG33110	11258.6	-3.18939	0.88392	-3.60823	0.000308296	0.00710894
CR43717	29.11	8.42074	2.33522	3.60597	0.000310983	0.00713032
CG31639	44.9987	-8.86096	2.45679	-3.60672	0.000310097	0.00713032
Cad96Cb	93.169	-3.10669	0.861484	-3.60621	0.000310702	0.00713032
CG8965	1553.27	4.33455	1.20332	3.60215	0.000315602	0.00722259
knrl	960.659	4.83887	1.3442	3.59983	0.000318427	0.00727354
ubl	1641.36	-1.71441	0.476634	-3.59691	0.000322014	0.00734168
nan	191.889	-2.59928	0.724583	-3.58728	0.000334139	0.00760386
CG31007	58.7099	-4.8272	1.34611	-3.58602	0.000335759	0.00762644
dpn	93.8908	6.56456	1.83133	3.5846	0.000337601	0.00765397
IM23	8531.43	6.17045	1.72538	3.57629	0.0003485	0.00787621
wupA	805.073	3.5963	1.00564	3.57614	0.0003487	0.00787621
CG1140	2870.31	-1.53283	0.428686	-3.57563	0.000349381	0.00787695
verm	3614.56	3.26166	0.914296	3.5674	0.000360542	0.00811354
CG7201	66.7058	9.62055	2.69746	3.56652	0.000361751	0.00812569
slbo	111.821	4.85592	1.36275	3.56332	0.000366196	0.00821036
CR43452	97.9988	-3.23634	0.909547	-3.5582	0.000373412	0.00834135
CG15343	247.45	-3.37133	0.947438	-3.55836	0.000373172	0.00834135
nxf2	435.35	-1.8359	0.516857	-3.55205	0.00038224	0.00852291
eIF4E-4	276.172	-3.39117	0.95499	-3.551	0.000383771	0.00854136
DmsR-2	1408.84	-1.56815	0.44192	-3.54848	0.000387455	0.00859189
ara	1112.62	2.51991	0.710071	3.54881	0.000386982	0.00859189
esn	5591.02	-1.5698	0.44253	-3.54732	0.000389167	0.00861413
CG13323	454.547	4.72256	1.33234	3.54457	0.000393249	0.00868865
CG13889	1563	-3.04451	0.859952	-3.54033	0.000399626	0.00881353
vkg	2457.13	1.724	0.487341	3.53757	0.000403826	0.00889001
scro	4394.15	1.49238	0.422512	3.53217	0.000412169	0.00905729
Or71a	62.4968	3.15251	0.893317	3.52899	0.000417146	0.00915011
DnaJ-H	9985.85	1.46819	0.416493	3.52513	0.000423278	0.00926788
CR43481	173.588	-2.41334	0.68491	-3.52359	0.000425747	0.00930517
CG13947	604.212	-5.64614	1.60515	-3.51751	0.000435617	0.0095038
CG31462	2222.47	-2.60181	0.740055	-3.51569	0.000438606	0.00955186
CG5790	21.2139	-7.77559	2.21477	-3.51079	0.000446778	0.00969508
Gr64a	86.8431	-3.5267	1.0045	-3.51091	0.000446573	0.00969508
alpha-Man-IIb	1623.87	-1.56359	0.445651	-3.50854	0.000450567	0.00975988
CG9090	1316.19	4.52864	1.29163	3.50616	0.000454629	0.00983034
Neurochondrin	31.7699	6.02459	1.71883	3.50505	0.000456526	0.00985382
Hey	443.236	-2.67272	0.763202	-3.50199	0.0004618	0.00994998
CG15828	5241.97	-1.86077	0.531823	-3.49886	0.000467257	0.0100498
CG5107	178.393	4.74766	1.35887	3.49384	0.000476127	0.0102224
IM14	5265.49	4.84121	1.3864	3.49193	0.000479541	0.0102776
wuc	21.9546	-7.82438	2.24234	-3.48938	0.000484145	0.0103398
CG13659	355.101	2.92675	0.838724	3.48952	0.000483888	0.0103398
vri	24505.5	-2.72403	0.78144	-3.48591	0.000490468	0.0104564
CG15531	27.2359	6.84923	1.96815	3.48004	0.000501343	0.0106696
Skp2	528.097	3.29842	0.948316	3.47819	0.000504819	0.0107248
CG5377	1075.44	1.54941	0.446391	3.47098	0.000518572	0.0109977
Fhos	2543.72	1.62165	0.467401	3.46951	0.000521414	0.0110237
CG4115	3888.25	5.50645	1.58715	3.4694	0.000521613	0.0110237
CG6839	123.53	5.24862	1.51493	3.4646	0.000531028	0.0112032
CG5791	10389.8	5.63168	1.62762	3.46007	0.000540039	0.0113736
CG5888	1036.06	1.89438	0.547637	3.45919	0.000541806	0.011391
Glt	727.464	2.7795	0.804034	3.45695	0.000546335	0.0114547
CG42249	159.267	-4.66323	1.34902	-3.45676	0.000546721	0.0114547
CR43637	235.97	-2.17157	0.628423	-3.45558	0.000549108	0.011485
CG4287	3867.07	1.47567	0.427231	3.45402	0.000552287	0.0115148
CG8907	727.608	3.03155	0.877704	3.45396	0.000552429	0.0115148
CG31523	94167	4.34473	1.26078	3.44606	0.000568822	0.0118362
Pkg21D	23.0858	8.09756	2.35292	3.44149	0.000578524	0.0120175
CG5897	391.692	3.88068	1.12805	3.44016	0.000581366	0.0120559
CG8492	115.91	2.78814	0.810613	3.43954	0.0005827	0.012063
CR44133	19.1978	7.82502	2.27771	3.43548	0.000591512	0.0122246
Gld	1053.32	4.11302	1.19846	3.43192	0.000599324	0.012365
dpr20	7820.12	1.42426	0.415257	3.42983	0.000603965	0.0124186
CG7386	758.478	-2.18619	0.637401	-3.42985	0.000603907	0.0124186
CG6018	208.657	2.0957	0.611678	3.42615	0.000612198	0.0125645
CG10405	93.8402	5.03183	1.46883	3.42574	0.000613129	0.0125645
CG5171	565.22	3.95782	1.15595	3.42386	0.000617383	0.0126091
fd96Ca	39.2022	5.88401	1.7185	3.42392	0.000617245	0.0126091
CG44153	11212.9	-1.89308	0.552982	-3.4234	0.000618439	0.0126095
CG14323	23.3264	8.10086	2.36751	3.42168	0.000622353	0.0126681
CG14545	18.9913	7.81081	2.28464	3.41883	0.000628908	0.0127801
Rep	2795.04	-1.74887	0.511877	-3.41659	0.000634109	0.0128215
CG13705	51.0624	-3.3246	0.973019	-3.41678	0.000633657	0.0128215
CG12001	2473.56	-1.77201	0.518515	-3.41747	0.000632052	0.0128215
nub	354.993	2.10048	0.615151	3.41458	0.000638802	0.0128949
CR43282	45.6586	-4.14891	1.21592	-3.41217	0.000644489	0.0129881
CG4078	1028.31	1.63248	0.479345	3.40566	0.000660055	0.0132798
CG10211	884.955	4.94656	1.45463	3.40058	0.000672443	0.0134844
CG32105	1325.17	1.57423	0.462885	3.40092	0.000671586	0.0134844
edl	1340.14	3.26767	0.961495	3.39854	0.000677477	0.0135629
CG13086	58.6633	4.54644	1.34003	3.39279	0.000691855	0.0138129
Klp59D	37.1402	-8.58412	2.53022	-3.39263	0.000692239	0.0138129
Nep1	4224.48	1.57959	0.465751	3.39149	0.000695146	0.0138482
Or22c	71.6709	-3.14779	0.929606	-3.38615	0.000708798	0.0140971
CG11413	61.6315	4.8376	1.43084	3.38095	0.000722345	0.014343
CG3823	375.765	3.36079	0.996357	3.37308	0.000743318	0.0147354
CG6910	5509.91	2.08019	0.616859	3.37223	0.00074563	0.0147572
trh	555.266	1.80056	0.534593	3.36809	0.000756911	0.0149561
CG42288	177.264	-3.833	1.1389	-3.36553	0.000763974	0.0150711
CG12885	195.141	-4.63906	1.37936	-3.36321	0.000770418	0.0151736
TotX	1133.13	6.14233	1.83025	3.35601	0.000790768	0.0155492
bbg	5711.9	4.32162	1.28815	3.3549	0.000793948	0.0155865
Mlc2	1905.92	4.14618	1.23867	3.34729	0.000816069	0.015995
CG15818	918.175	5.28914	1.58235	3.34258	0.000830022	0.0162422
CG7196	158.471	-4.58465	1.3729	-3.33938	0.000839651	0.0164042
Nlg1	136.043	2.54514	0.762545	3.33769	0.000844786	0.0164656
Lgr1	2111.47	1.49355	0.447512	3.33745	0.000845504	0.0164656
CG13748	867.527	13.3234	3.996	3.33419	0.000855495	0.0165991
CG30002	22.2193	-7.84322	2.35209	-3.33457	0.00085432	0.0165991
CG10514	927.518	1.88123	0.564277	3.33387	0.000856453	0.0165991
CG9134	1060.12	3.60238	1.08163	3.33052	0.000866847	0.0167252
capa	1063.08	2.89628	0.869638	3.33044	0.000867087	0.0167252
upd2	443.723	5.44106	1.63368	3.33056	0.000866709	0.0167252
regucalcin	6317.99	2.14267	0.643986	3.32719	0.000877258	0.0168945
CG18641	606.919	4.94625	1.49033	3.31889	0.000903771	0.0173776
CG8632	7707.13	1.40527	0.423614	3.31734	0.000908787	0.0174464
CG43085	33.9017	5.19594	1.56945	3.31067	0.00093073	0.0178395
CG31183	1804.09	-1.78684	0.540002	-3.30896	0.000936442	0.0179207
CG43071	59.1315	7.95851	2.40677	3.30672	0.000943939	0.0180358
CG11052	209.498	-2.3877	0.722412	-3.30517	0.000949187	0.0181076
E23	1309.37	3.84832	1.16626	3.29972	0.000967826	0.0184342
trbl	531.774	3.10573	0.941365	3.29917	0.000969699	0.018441
dgt5	81.9094	2.92069	0.885959	3.29665	0.000978469	0.0185503
Fuca	328.233	1.85198	0.561778	3.29664	0.000978503	0.0185503
CG31675	72.6677	3.66335	1.11148	3.29592	0.000981007	0.0185689
Tdc2	6322.06	-2.54706	0.773389	-3.29337	0.000989936	0.0187087
CG9812	9959.36	-1.90997	0.580484	-3.29031	0.00100078	0.0188842
CG32237	18.6614	-7.59013	2.30818	-3.28837	0.0010077	0.0189854
inaC	2554.4	-1.73828	0.529412	-3.28341	0.00102558	0.0192923
Cat	17185.3	-1.57727	0.480536	-3.28232	0.00102957	0.0193374
CG14780	298.339	3.19104	0.972849	3.2801	0.00103769	0.0194299
CG1324	28.976	-8.22617	2.50776	-3.28029	0.001037	0.0194299
E(spl)malpha-BFM	353.698	6.4365	1.96307	3.27879	0.00104252	0.0194902
Yp3	4945.15	3.49665	1.06732	3.27611	0.00105246	0.019646
Mf	808.877	3.14146	0.959338	3.27461	0.00105807	0.0197204
CG6310	390.599	2.42674	0.741184	3.27414	0.00105985	0.0197232
CR43608	94.7051	2.72253	0.832251	3.27128	0.00107062	0.0198932
Phlpp	27.9756	4.5902	1.40348	3.27058	0.00107327	0.0199121
Tret1-1	9232.4	2.66976	0.817407	3.26614	0.00109026	0.0201964
Ret	134.892	2.40037	0.7351	3.26536	0.00109324	0.0202207
CR43929	18.3223	7.75377	2.37549	3.26408	0.00109821	0.0202818
CG13833	29261.9	-3.24205	0.993406	-3.26357	0.00110019	0.0202875
sug	128.289	2.42103	0.742163	3.26212	0.00110582	0.0203605
CR44095	479.514	3.64158	1.1172	3.25955	0.00111591	0.0205151
CG31248	3049.04	1.82316	0.5595	3.25855	0.00111983	0.0205562
CG33965	266.027	-2.68786	0.826212	-3.25323	0.00114103	0.0209045
CycA	154.316	2.37178	0.729123	3.25292	0.00114225	0.0209045
Proct	31124.2	-1.67221	0.514521	-3.25003	0.00115391	0.0210863
Oseg4	503.337	-2.97227	0.916012	-3.24479	0.00117537	0.0214461
Obp19d	10424.4	4.39206	1.35797	3.23428	0.00121948	0.0222175
D19A	4283.26	-1.35742	0.419877	-3.23289	0.00122545	0.022293
Prosbeta2	8657.49	-1.33336	0.412586	-3.23172	0.00123049	0.0223511
CG12825	699.086	2.7002	0.836261	3.22889	0.00124271	0.0225394
CG16820	996.597	4.06196	1.25947	3.22514	0.00125912	0.0228029
CG34034	106.812	6.62002	2.05331	3.22407	0.00126383	0.0228542
CG14573	31.7832	7.07502	2.1951	3.2231	0.00126811	0.0228976
CG31875	76.6149	3.77892	1.17325	3.2209	0.0012779	0.0230376
RpS28a	40.4021	-3.47322	1.07847	-3.2205	0.00127965	0.0230376
nimA	32.0676	-3.87028	1.20304	-3.21707	0.00129508	0.0232464
tup	6030	2.54945	0.792445	3.21719	0.00129453	0.0232464
CG32645	188.668	4.74322	1.4746	3.21662	0.00129709	0.0232481
CG6836	2145.1	3.11693	0.969295	3.21566	0.00130143	0.0232742
CG31102	501.498	2.7044	0.841064	3.21546	0.00130237	0.0232742
CG9582	17.5821	-7.50437	2.33506	-3.21378	0.00130999	0.023376
mfas	28584.3	2.57565	0.803303	3.20632	0.00134443	0.0239552
AttB	227.843	-2.64706	0.826614	-3.2023	0.00136337	0.0242572
CG8851	20.1709	-6.35566	1.98605	-3.20015	0.00137356	0.0244028
Fcp3C	171.797	-2.44197	0.763522	-3.19829	0.00138245	0.0245249
CG10407	130.028	2.45736	0.769019	3.19545	0.00139612	0.0247312
CG6553	713.881	2.3458	0.734447	3.19396	0.00140333	0.0247531
CG10253	18486.8	2.82665	0.885005	3.19394	0.00140346	0.0247531
CG15554	154.528	-2.28889	0.716571	-3.19423	0.00140206	0.0247531
CG43236	154.529	3.31205	1.03829	3.1899	0.0014232	0.0250649
CG40486	16.5421	7.61344	2.39177	3.18318	0.00145668	0.0256173
CG7407	5729.06	1.49994	0.471399	3.18189	0.00146317	0.0256943
CG15117	490.564	1.68073	0.528365	3.181	0.00146768	0.0257049
CG2022	45.9112	4.4424	1.39657	3.18093	0.00146801	0.0257049
CG17322	569.103	2.64753	0.832804	3.17905	0.00147756	0.025835
fbp	647.603	2.31317	0.728312	3.17607	0.00149286	0.0260649
CG32225	12610.1	1.30173	0.40991	3.17564	0.00149505	0.0260658
CG16758	2384.1	2.39351	0.754191	3.17362	0.00150552	0.0262005
BM-40-SPARC	6938.04	1.86608	0.588055	3.17331	0.00150709	0.0262005
CG33777	195.28	2.26081	0.712602	3.17261	0.00151073	0.0262263
CG13579	3481.15	1.45306	0.458288	3.17063	0.00152107	0.0263305
CG5906	21.5627	-7.80001	2.45993	-3.17083	0.00152003	0.0263305
CG33276	686.547	2.25793	0.712607	3.16855	0.00153202	0.0264823
Apf	1239.4	-1.64488	0.519434	-3.16668	0.00154191	0.0265437
CG34445	25.2713	6.78019	2.14113	3.16664	0.00154212	0.0265437
Vha36-3	285.682	-2.59624	0.819683	-3.16737	0.00153826	0.0265437
Act87E	119.159	-2.28675	0.722345	-3.16574	0.00154691	0.0265885
CG10268	2348.53	1.72773	0.54597	3.16452	0.0015534	0.0266537
CG42816	228.09	-3.37983	1.06815	-3.1642	0.00155509	0.0266537
Fer2	1118.59	1.67152	0.528618	3.16207	0.00156654	0.0268121
hipk	54245	-1.32926	0.420437	-3.16162	0.00156897	0.0268159
fkh	6701.97	2.65693	0.840968	3.15937	0.00158108	0.0269849
Rdh	530.461	-2.43634	0.77156	-3.15769	0.00159027	0.0270658
Os-C	20.9829	7.94769	2.51691	3.15772	0.00159008	0.0270658
CG1443	29886.1	3.88746	1.2315	3.15669	0.00159568	0.0271199
CG34355	7891.69	-1.38587	0.439186	-3.15555	0.00160197	0.0271887
pb	181.398	2.00795	0.636732	3.15353	0.0016131	0.0272847
Ugt86Dh	30.9909	7.07902	2.24461	3.15379	0.00161163	0.0272847
ssx	15379.9	-1.69234	0.536689	-3.1533	0.00161436	0.0272847
CG17738	33.4033	8.6209	2.73495	3.15212	0.00162088	0.0273569
CG7759	824.205	3.06672	0.973672	3.14964	0.00163469	0.0275517
CG31176	1541.24	4.40874	1.40016	3.14875	0.00163973	0.0275602
CG14526	591.059	2.31739	0.735959	3.1488	0.00163943	0.0275602
CG33262	18.1669	-7.55094	2.40341	-3.14176	0.00167936	0.0281856
CG17698	16182.8	1.36552	0.43469	3.14137	0.00168158	0.0281856
CG32532	1424.05	1.53617	0.489304	3.1395	0.00169234	0.028327
Drep-1	3775.94	1.4849	0.473316	3.13724	0.00170548	0.0285076
betaggt-I	4040.06	2.42773	0.774115	3.13613	0.00171194	0.0285763
asp	120.545	-2.64446	0.843537	-3.13497	0.00171872	0.0286501
CG13078	24.8376	-5.30795	1.69365	-3.13402	0.00172429	0.0287035
CG34168	65.9269	-6.41212	2.0477	-3.13138	0.00173987	0.0289233
CG5043	38.0799	-8.62002	2.75331	-3.13078	0.0017434	0.0289423
CG2444	124.903	4.24373	1.35799	3.12501	0.00177797	0.029476
CG15211	1162.24	3.59655	1.15113	3.12437	0.00178184	0.0294998
CG42458	2859.24	1.5382	0.492671	3.12217	0.00179523	0.0296811
brk	1020.44	-1.60835	0.515383	-3.12068	0.00180432	0.029791
CG1698	1140.76	2.52042	0.807857	3.11988	0.00180926	0.0298319
CG13183	46.4528	5.38916	1.72793	3.11885	0.00181561	0.029896
RpL32	44522.2	-1.37263	0.440415	-3.11668	0.00182898	0.0300755
CG14153	581.602	2.10689	0.676132	3.1161	0.0018326	0.0300942
sob	1620.33	4.61575	1.48346	3.11147	0.00186156	0.0305286
CG9970	43.1682	-4.97671	1.6005	-3.10947	0.00187422	0.0306947
CG16799	944.086	3.01314	0.969234	3.10879	0.00187857	0.0307246
CG2893	1702.42	1.90904	0.614492	3.10669	0.00189194	0.0309016
CR44062	86.5912	7.54487	2.42979	3.10515	0.00190179	0.0309794
CG14516	921.208	2.11708	0.681722	3.10549	0.00189964	0.0309794
CG8654	361.154	3.11212	1.00237	3.10475	0.00190438	0.0309799
CG5009	8692.41	-1.34027	0.43245	-3.09926	0.00194006	0.0315182
Cyp4e2	1174.12	2.59565	0.838276	3.09641	0.00195878	0.0317798
CG14963	91.9068	-2.53745	0.819896	-3.09484	0.0019692	0.0319063
CG4716	1514.13	3.12555	1.01072	3.09241	0.0019854	0.0319982
Or59b	15.4232	7.51113	2.42803	3.0935	0.00197809	0.0319982
CG10553	2436.87	-2.13258	0.689567	-3.09264	0.00198388	0.0319982
CG1444	27487.5	2.10531	0.680631	3.09317	0.00198027	0.0319982
CG14342	15.4281	7.50841	2.43252	3.08668	0.00202403	0.0325776
CG13875	781.727	-1.91396	0.620413	-3.08497	0.00203572	0.0327222
lox2	32.8004	7.10427	2.30485	3.08231	0.00205399	0.0329724
Cg25C	7620.68	1.3495	0.438313	3.07885	0.00207803	0.0331896
CG31802	75.5501	-4.56098	1.48109	-3.07947	0.00207369	0.0331896
Chd64	13724.7	2.24564	0.729212	3.07955	0.00207314	0.0331896
SmD1	1232.74	-1.49197	0.484596	-3.07879	0.00207845	0.0331896
CG8665	104.51	4.84277	1.57317	3.07835	0.00208153	0.0331952
Skadu	16.8373	-7.4414	2.41957	-3.07551	0.00210145	0.033469
Orco	163.405	2.37507	0.772833	3.0732	0.00211776	0.0336846
ninaG	149.594	2.46964	0.804035	3.07156	0.00212945	0.0338262
Cp19	16.4967	-7.41327	2.41552	-3.06902	0.00214763	0.0340704
CG17193	2606.05	1.3053	0.42544	3.0681	0.00215422	0.0341305
DCX-EMAP	693.167	-2.07959	0.678519	-3.06489	0.00217747	0.034454
CG14946	1998.05	1.76484	0.576292	3.06241	0.0021956	0.0346661
Scp2	15577	1.91663	0.625884	3.06228	0.00219659	0.0346661
Cda9	665.188	2.60406	0.851467	3.05833	0.00222576	0.035081
CG9836	42566.2	1.69417	0.554279	3.05654	0.00223911	0.0352457
CG13751	1111.54	-1.87741	0.6145	-3.05518	0.00224925	0.0353138
CG8468	244.937	1.95118	0.638606	3.05537	0.00224781	0.0353138
CG15395	18.2853	-6.21499	2.0347	-3.05449	0.0022544	0.035349
CG3822	6529.44	-1.26611	0.414597	-3.05384	0.00225934	0.0353808
Cys	183.41	3.8103	1.24818	3.05267	0.00226815	0.0354731
CG2267	29.454	-8.24964	2.70527	-3.04948	0.00229241	0.0358064
CG30101	44.4781	6.57437	2.15712	3.04776	0.00230558	0.0359197
CG11380	44.4781	6.57437	2.15712	3.04776	0.00230558	0.0359197
CG7910	162.135	-2.57836	0.846679	-3.04527	0.00232475	0.0361573
Csat	2466.12	2.44688	0.803571	3.045	0.00232678	0.0361573
rols	2736.94	3.43445	1.12981	3.03984	0.00236702	0.0367357
Kr	993.915	1.67116	0.549955	3.03872	0.00237582	0.0368252
Dif	4527.95	-1.44675	0.476307	-3.03744	0.00238596	0.0369353
CG5096	623.044	3.54002	1.16717	3.03301	0.0024213	0.0374346
CG6362	733.987	-3.065	1.01117	-3.03113	0.00243644	0.0375948
Gyc88E	2628.3	-1.5432	0.509146	-3.03095	0.00243784	0.0375948
Dbp80	9001.64	1.39466	0.461315	3.02322	0.00250104	0.0385204
CG34302	15.4072	-7.31399	2.42231	-3.01942	0.00253255	0.0389564
CR44114	19.0107	7.80506	2.5867	3.01738	0.0025497	0.0391087
CG10657	486.91	3.09885	1.02704	3.01726	0.00255073	0.0391087
NetB	15037.4	1.26193	0.418259	3.01709	0.00255211	0.0391087
RunxA	547.723	1.66802	0.553305	3.01465	0.00257273	0.0393751
CG13250	19.896	7.87087	2.61293	3.01228	0.00259293	0.0396343
CG9883	111.066	-2.19451	0.729204	-3.00946	0.00261714	0.039854
CG9270	127.728	-2.39122	0.79454	-3.00957	0.00261621	0.039854
CG10140	41.5487	4.32636	1.43723	3.0102	0.00261079	0.039854
CG33966	29.3589	-3.90647	1.29842	-3.00864	0.00262424	0.039912
CG14568	81.4815	8.41162	2.79735	3.007	0.00263841	0.0400457
Cyp318a1	22.9356	-5.19659	1.72825	-3.00686	0.00263961	0.0400457
CG30089	12046.3	-1.28747	0.428278	-3.00616	0.00264567	0.0400876
CG31861	150.666	-3.33867	1.11172	-3.00317	0.00267187	0.0403915
nclb	2515.69	-1.52644	0.508288	-3.00311	0.00267238	0.0403915
CG30376	36.7684	-5.53045	1.84329	-3.00032	0.00269694	0.0407121
CG32639	27.8374	5.21458	1.73919	2.99829	0.00271501	0.040934
GlcAT-S	8238.93	1.77969	0.593921	2.99651	0.00273089	0.0411224
BoYb	28.86	-4.83539	1.6142	-2.99553	0.00273973	0.0412044
CG44085	1351.28	2.49112	0.831859	2.99465	0.00274763	0.0412583
CG2650	1027.68	-2.28983	0.764711	-2.99437	0.0027501	0.0412583
CG9896	9864.87	1.63754	0.547	2.99367	0.0027564	0.0412811
CG7884	131.158	4.53995	1.51663	2.99345	0.00275841	0.0412811
CG13690	21.6141	4.52737	1.51503	2.9883	0.00280536	0.0419045
CG33199	3329.03	1.33478	0.446696	2.98812	0.00280697	0.0419045
CG5267	287.759	-1.9264	0.644872	-2.98727	0.00281483	0.0419703
CG5149	4327.97	1.26101	0.422405	2.9853	0.00283302	0.0421898
Nep2	1802.03	2.21361	0.741615	2.98485	0.00283716	0.0421997
snoRNA:Or-CD12	51.1195	2.73451	0.916756	2.98281	0.00285612	0.0423779
Ets96B	661.41	2.55676	0.857076	2.98312	0.00285326	0.0423779
CG34148	84.6632	2.98297	1.00026	2.98218	0.00286204	0.042414
Cyp12c1	166.579	3.00737	1.00897	2.98064	0.00287642	0.0425753
Rcd2	2674.1	3.03214	1.01797	2.97861	0.00289557	0.0428066
CG34203	88.9114	3.10534	1.04308	2.97708	0.00291004	0.0429647
CG11170	607.855	1.95474	0.656754	2.97637	0.00291687	0.0429647
CG32082	2087.02	-1.70002	0.571116	-2.97666	0.00291403	0.0429647
CG7333	15.6247	-7.33359	2.4644	-2.97581	0.00292214	0.0429901
CG14960	55.923	9.36657	3.14883	2.97462	0.00293354	0.0430536
CG13058	55.923	9.36657	3.14883	2.97462	0.00293354	0.0430536
CanA1	22.074	5.48663	1.84592	2.97229	0.00295584	0.0433285
CG15625	15.2574	-7.29944	2.45679	-2.97113	0.00296706	0.0434406
Muc30E	40.2041	5.45398	1.83604	2.97051	0.00297307	0.0434762
CG34347	6871.23	-1.37304	0.462528	-2.96855	0.00299204	0.0437011
mthl4	95.3299	4.3056	1.4517	2.9659	0.00301802	0.0439221
laza	1757.7	3.11095	1.04882	2.96616	0.00301547	0.0439221
ctrip	13934.6	-1.22651	0.413438	-2.96661	0.00301103	0.0439221
CG42392	1055.88	-1.31866	0.444665	-2.96552	0.00302173	0.0439235
CG5958	599.131	2.71224	0.915254	2.96337	0.0030429	0.0440827
rost	1721.73	3.68091	1.24207	2.96353	0.00304136	0.0440827
pncr008:3L	55.1066	9.34534	3.15369	2.9633	0.00304356	0.0440827
Imp	22140.7	-1.21573	0.410333	-2.9628	0.00304855	0.0441024
l(3)mbn	74.8631	2.55999	0.864903	2.95986	0.00307781	0.0444726
CG31431	144.471	2.85491	0.965313	2.9575	0.00310145	0.044761
Mhc	692.739	3.79562	1.28425	2.95551	0.00312153	0.0449594
Optix	1625.37	1.33012	0.450118	2.95504	0.00312629	0.0449594
Reck	487.924	1.43733	0.486345	2.95538	0.00312286	0.0449594
mthl11	139.923	-3.3703	1.14111	-2.95353	0.00314165	0.0451269
AttC	4268.66	14.0766	4.76882	2.9518	0.0031593	0.0453268
Abl	5377.1	-1.23757	0.419642	-2.9491	0.00318704	0.0456288
Cyp6d5	21144.9	-1.94057	0.65804	-2.94902	0.00318786	0.0456288
Adh	457.74	3.70406	1.25777	2.94495	0.00323009	0.0461246
CG6980	133.918	-3.07895	1.04548	-2.94502	0.00322937	0.0461246
CG4945	146.947	2.23564	0.759246	2.94455	0.00323422	0.0461294
plu	21.8207	4.95196	1.68221	2.94372	0.00324298	0.0462001
CG5527	29.6549	4.99892	1.69922	2.94189	0.00326212	0.0464183
Gale	7503.65	2.14847	0.730583	2.94076	0.00327411	0.0465345
CG32164	844.074	1.59454	0.542459	2.93947	0.00328772	0.0466734
Lsd-1	1756.79	3.22239	1.09681	2.93795	0.00330391	0.0468484
CG31778	63.7417	3.75868	1.27962	2.93733	0.0033105	0.0468872
CG7208	61.6253	3.11349	1.06021	2.93668	0.00331749	0.0469315
os	126.662	6.5353	2.22658	2.93513	0.00333413	0.0471121
CG12374	263.675	3.21622	1.09608	2.9343	0.00334305	0.0471831
Cpr60D	122.624	4.73393	1.6137	2.9336	0.00335057	0.0472344
sut2	774.35	4.44762	1.51654	2.93274	0.0033598	0.047255
nvd	54.7259	-4.82292	1.64445	-2.93285	0.00335866	0.047255
ade5	1096.17	1.83704	0.626652	2.93151	0.00337316	0.0473881
trpgamma	71.3399	2.52648	0.86223	2.93017	0.00338773	0.0475377
qua	161.431	-3.50562	1.19818	-2.92579	0.00343588	0.0481578
CG32971	18.2012	-6.21266	2.12491	-2.92373	0.00345865	0.0483654
esg	348.846	4.79627	1.64028	2.92406	0.00345503	0.0483654
snoRNA:tra2-a	75.655	2.51774	0.861348	2.92303	0.00346646	0.0483786
PGRP-SA	399.419	2.45012	0.838241	2.92293	0.00346756	0.0483786
sli	11794.7	-1.22879	0.420574	-2.9217	0.00348131	0.0485147
CG9308	75.5296	-2.41138	0.82692	-2.9161	0.00354436	0.0492804
CG42395	16.7731	-6.0904	2.08847	-2.91621	0.00354315	0.0492804
CG17660	4288.56	1.78919	0.613672	2.91555	0.00355068	0.0493118
Ho	4509.19	1.3764	0.472819	2.91104	0.00360226	0.049971
Cct5	7648.88	-1.26048	0.433089	-2.91045	0.00360914	0.0499924
Cdk4	452.246	3.05656	1.05043	2.90983	0.00361626	0.0499924
CG14132	535.781	3.36047	1.155	2.90948	0.00362025	0.0499924
CG31556	51.4328	9.24572	3.17725	2.90998	0.00361457	0.0499924
