# Supplementary material for: Striking circadian neuron diversity and cycling of Drosophila alternative splicing
Source: eLife journal article supplement (doi:10.7554/elife.35618), 2018-06-04
Supplement: supp [file elife-35618-supp-v1.zip › elife_poa_e35618_Figure_3_source_data_8.xlsx]

## Sheet: LNd_vs_TH_qvalue_0_05
	baseMean	log2FoldChange	lfcSE	stat	pvalue	padj
mfr	7727.34	-10.7528	1.0092	-10.6548	1.65642e-26	1.92758e-22
jhamt	11218.5	6.7333	0.654894	10.2815	8.53755e-25	4.96758e-21
IFa	5436.96	6.50441	0.672744	9.66847	4.10486e-22	1.59228e-18
CG8785	482.701	7.27273	0.818826	8.88191	6.57229e-19	1.91204e-15
Sgs5	9852.17	29.2707	3.38866	8.63783	5.72903e-18	1.33338e-14
CG13565	214562	10.1353	1.17847	8.60038	7.94535e-18	1.541e-14
CG6912	6943.63	-8.51941	1.02422	-8.31793	8.9513e-17	1.48809e-13
Drs	18909.5	8.40172	1.02025	8.23496	1.79614e-16	2.61271e-13
CG14191	1411.79	26.5558	3.37444	7.86968	3.55556e-15	4.59734e-12
CG42821	683.593	9.65525	1.45724	6.62572	3.45551e-11	4.02118e-08
CG43134	21907.2	10.9815	1.72532	6.36493	1.95382e-10	2.06697e-07
CG15695	349.729	8.67308	1.36777	6.34106	2.28194e-10	2.21291e-07
CG10553	422.756	10.7947	1.71402	6.29788	3.01734e-10	2.70099e-07
CG9411	1488.59	11.0455	1.78508	6.18768	6.10548e-10	5.07496e-07
CG9747	5682.07	15.9395	2.58105	6.17557	6.59255e-10	5.1145e-07
CG34205	25061.6	11.9802	1.94729	6.15223	7.64014e-10	5.55677e-07
Cyp313a1	18614.4	8.18276	1.3437	6.0897	1.13121e-09	7.74347e-07
CG4927	361.548	6.10167	1.00774	6.05481	1.40587e-09	9.08893e-07
CG4757	20708.5	7.59867	1.25857	6.03754	1.56479e-09	9.58391e-07
CG13285	25131.8	14.1586	2.34871	6.02823	1.65767e-09	9.64516e-07
Cyp4aa1	3463.21	15.2251	2.52906	6.02008	1.74329e-09	9.66033e-07
CG9733	1248.9	13.7536	2.29682	5.9881	2.123e-09	1.12297e-06
itp	432467	-7.85299	1.32334	-5.93423	2.95224e-09	1.4937e-06
Sdic3	256.276	6.31097	1.06511	5.92521	3.11895e-09	1.5123e-06
c-cup	229.976	11.3136	1.93424	5.8491	4.94245e-09	2.30061e-06
Cyp4d21	2802.4	9.64977	1.65701	5.82359	5.75952e-09	2.48235e-06
CG13616	881.022	-6.68505	1.14705	-5.82805	5.60777e-09	2.48235e-06
CG9757	234.443	24.0518	4.1473	5.79938	6.65598e-09	2.72672e-06
Trissin	48466.3	-6.76299	1.16686	-5.79591	6.79513e-09	2.72672e-06
CG15649	4595.61	15.6333	2.73127	5.72382	1.04155e-08	4.04017e-06
sub	110.813	-6.17256	1.08313	-5.69882	1.20641e-08	4.52872e-06
CG10175	2547.15	10.0459	1.76702	5.68519	1.30666e-08	4.75174e-06
nerfin-1	1645.13	-6.17707	1.09085	-5.66264	1.49065e-08	5.25658e-06
CG3770	1082.15	8.18876	1.46543	5.58796	2.29758e-08	7.86382e-06
v(2)k05816	262.047	-5.85668	1.079	-5.4279	5.702e-08	1.84317e-05
CG5873	111.39	22.7661	4.19388	5.42842	5.68551e-08	1.84317e-05
CG1124	39590.3	9.50753	1.76026	5.40122	6.61902e-08	2.08177e-05
CG15155	9021.58	16.6064	3.07872	5.39393	6.8932e-08	2.11095e-05
Crz	1973	6.98562	1.31378	5.31719	1.05384e-07	3.1445e-05
CG14568	80.0242	22.5424	4.2495	5.30471	1.12849e-07	3.28307e-05
DAT	39939.2	5.83647	1.11	5.25808	1.45564e-07	4.13154e-05
CR40469	2819.7	-6.19866	1.18189	-5.24469	1.56544e-07	4.33739e-05
os	123.454	21.9101	4.18161	5.23963	1.60897e-07	4.35433e-05
ems	96.9139	7.75647	1.48309	5.22992	1.69579e-07	4.48499e-05
CG9737	726.108	12.9711	2.48652	5.21658	1.82262e-07	4.71328e-05
CG11852	120.583	7.52789	1.44877	5.19606	2.03557e-07	5.14954e-05
CG10725	529.717	8.19523	1.57982	5.18746	2.13187e-07	5.27841e-05
Chd3	85.6881	-9.86468	1.91486	-5.15164	2.58221e-07	6.26026e-05
CG42715	129.217	9.08495	1.79812	5.05247	4.36129e-07	0.000103576
sob	1532.85	12.472	2.5129	4.96322	6.93346e-07	0.000152235
CG18302	87.0573	9.90956	1.99335	4.97131	6.65024e-07	0.000152235
CG1942	105.521	10.1871	2.05224	4.96388	6.90976e-07	0.000152235
CG10345	4590.07	7.39529	1.48879	4.96732	6.78837e-07	0.000152235
IntS12	3744.16	-4.95137	1.00226	-4.94019	7.80453e-07	0.000168188
CG8563	1004.85	10.674	2.16382	4.93297	8.09903e-07	0.000171361
CG11029	13746.9	10.1641	2.06376	4.92503	8.43481e-07	0.000175278
CG31205	6662.65	13.0368	2.68202	4.86081	1.16908e-06	0.000238677
ple	31524.3	6.62827	1.36914	4.84121	1.29053e-06	0.00025454
sad	4460.42	10.7879	2.22697	4.8442	1.27125e-06	0.00025454
CG5162	892.839	4.81541	1.00279	4.80202	1.57071e-06	0.000304639
Cpr65Az	100.77	7.84034	1.63939	4.78248	1.73143e-06	0.000330306
stg	189.479	-3.82036	0.799883	-4.77615	1.78683e-06	0.000335377
CG31103	585.046	6.29988	1.32122	4.76823	1.85855e-06	0.000343301
CG42822	98.3927	10.086	2.11889	4.76004	1.93556e-06	0.000349857
CG13639	64.7599	9.48592	1.99363	4.75811	1.95417e-06	0.000349857
upd3	1491.99	12.6453	2.65953	4.75471	1.98732e-06	0.0003504
yellow-e	152.468	7.89892	1.6697	4.73073	2.23712e-06	0.000388558
CG31105	77.4105	6.37715	1.3489	4.72768	2.27103e-06	0.000388647
CG5397	1061.23	8.01826	1.69958	4.71778	2.38437e-06	0.000402129
CG9095	1739.46	8.8748	1.88616	4.70522	2.53595e-06	0.000421583
CG4408	263.217	-9.01835	1.92736	-4.67913	2.88098e-06	0.000472196
Osi4	3005.05	-7.50035	1.60703	-4.66722	3.05301e-06	0.000493443
CG8401	101129	-3.96519	0.856194	-4.63119	3.63578e-06	0.000564128
CG31176	1449.51	10.5074	2.26762	4.63366	3.59265e-06	0.000564128
CG17777	31140.8	-6.34289	1.36815	-4.6361	3.55036e-06	0.000564128
emp	56653.2	8.29005	1.7976	4.61174	3.99309e-06	0.000611416
CG16756	851.217	-7.59602	1.65492	-4.58995	4.43351e-06	0.000670035
CG32751	89.1959	9.9443	2.16783	4.58721	4.49209e-06	0.000670185
CG7179	363.273	11.9718	2.61403	4.57983	4.65354e-06	0.000685484
CG14661	25585.1	8.35154	1.83134	4.56034	5.10704e-06	0.000742882
CG13748	854.386	10.4494	2.2978	4.54758	5.42663e-06	0.000779625
CG11854	1323.7	10.3774	2.29007	4.53147	5.85743e-06	0.000831255
CG18641	578.713	12.6438	2.80107	4.51392	6.36409e-06	0.000892277
zpg	169.932	-7.58854	1.68452	-4.50487	6.64128e-06	0.000920055
CG17261	161.012	-3.6616	0.814312	-4.49656	6.90626e-06	0.000942044
CG11147	15626	7.34503	1.63467	4.49328	7.01344e-06	0.000942044
Cht7	794.514	9.94456	2.21365	4.49239	7.04286e-06	0.000942044
uif	682.496	7.42021	1.66005	4.46987	7.8267e-06	0.00103499
CG3984	1013.81	-8.36189	1.8743	-4.46134	8.14493e-06	0.00106497
CG7675	3242.92	8.28051	1.85788	4.45698	8.31238e-06	0.00107479
Ilp8	80.1254	9.78943	2.20813	4.43336	9.27771e-06	0.00118642
CG40006	837.253	8.36052	1.88902	4.42586	9.60603e-06	0.00121506
CG2816	100.537	10.1172	2.29073	4.41657	1.00278e-05	0.00124142
CG4576	4030.87	10.1809	2.30471	4.41743	9.98825e-06	0.00124142
CG9990	11111.6	6.52815	1.4792	4.41329	1.01813e-05	0.00124715
CG3999	383.202	-2.98967	0.677825	-4.41068	1.03046e-05	0.00124911
Clect27	9302.24	8.27309	1.88098	4.39828	1.0911e-05	0.00130899
Cyp310a1	43.63	6.4707	1.47426	4.38913	1.13804e-05	0.00135136
yellow-b	564	7.21425	1.64499	4.38559	1.1567e-05	0.00135965
osk	151.045	-4.92484	1.12529	-4.37652	1.20588e-05	0.00140016
CG18577	46.6673	9.01031	2.05958	4.37484	1.21523e-05	0.00140016
Hml	6500.75	3.44214	0.787885	4.36884	1.24907e-05	0.00142505
RpS5b	428.22	-2.99287	0.685612	-4.36526	1.2697e-05	0.00143451
E5	54.444	7.83942	1.80593	4.34093	1.41884e-05	0.0015876
Vmat	113149	5.31861	1.22684	4.33522	1.45616e-05	0.00159959
Edg91	68.5722	9.56922	2.20739	4.33508	1.45705e-05	0.00159959
CG30427	8873.01	8.96899	2.07185	4.32898	1.49804e-05	0.00161253
hug	957038	-3.3773	0.780352	-4.32792	1.50524e-05	0.00161253
CG33110	1088	8.27965	1.91341	4.32717	1.51041e-05	0.00161253
CG13054	23063.2	-6.47116	1.49977	-4.31476	1.59778e-05	0.00169031
Gr89a	198.796	11.1017	2.57472	4.3118	1.61927e-05	0.00169761
CG43245	294.539	-5.24532	1.21721	-4.30931	1.63761e-05	0.00170151
CG17189	181.365	7.46511	1.73755	4.29634	1.73642e-05	0.0017882
TrpA1	3616.08	-2.91152	0.680052	-4.28131	1.85792e-05	0.00188813
tw	193.465	8.8324	2.06347	4.28036	1.86591e-05	0.00188813
CG32040	182.038	9.59826	2.25914	4.24863	2.15084e-05	0.0021577
Traf4	178.79	4.93419	1.16522	4.23455	2.29014e-05	0.00227781
y	68.3558	8.05026	1.9216	4.18935	2.79754e-05	0.0027589
asp	249.132	-3.91355	0.936437	-4.17919	2.92553e-05	0.00286087
CG13822	231.629	-3.25567	0.781862	-4.16399	3.12728e-05	0.00303268
CG1299	1511.78	5.9695	1.43618	4.15652	3.23137e-05	0.00310772
CG7402	349.366	11.9156	2.88419	4.13133	3.6067e-05	0.00344026
CG16820	931.473	6.95185	1.68687	4.12116	3.76974e-05	0.00356654
upd2	427.161	12.2057	2.9653	4.11616	3.85234e-05	0.0036153
CG7856	89.6678	-8.60675	2.09283	-4.11249	3.91417e-05	0.00364393
CG17324	144.566	10.6419	2.59134	4.10671	4.01341e-05	0.00370667
CG12523	421.056	-3.84127	0.936443	-4.10197	4.09642e-05	0.00375355
ds	344.862	8.16422	1.99331	4.09581	4.20691e-05	0.00382467
Def	168.75	9.49289	2.32181	4.08857	4.34038e-05	0.00391542
Yp1	347482	-9.73376	2.38961	-4.07337	4.63381e-05	0.00414797
CG13038	216.387	11.2242	2.75826	4.06929	4.71559e-05	0.00418895
verm	3202.89	8.56724	2.11599	4.0488	5.14804e-05	0.00453846
CG4324	58.0261	9.32335	2.30437	4.04594	5.2114e-05	0.00455978
CR44226	86.9785	-8.28212	2.05197	-4.03619	5.43272e-05	0.00471795
CG14339	147.232	9.29295	2.30787	4.02664	5.65798e-05	0.00487718
l(2)03659	37.6628	6.24595	1.55308	4.02164	5.77939e-05	0.00494521
Yp2	218158	-9.14827	2.27809	-4.01576	5.92543e-05	0.00503316
Ser	1206.72	8.89946	2.22289	4.00356	6.23957e-05	0.00526159
CG18557	51.4369	9.14926	2.29794	3.9815	6.84808e-05	0.00573317
CG17664	42.5555	6.58793	1.66474	3.95733	7.57916e-05	0.00629991
CG7560	503.79	-3.6081	0.91265	-3.95343	7.70376e-05	0.00632106
CR43624	74.5096	-3.68238	0.931508	-3.95314	7.71325e-05	0.00632106
CG8546	39.8434	6.49167	1.64397	3.94877	7.85536e-05	0.00639251
Cyp4e1	673.395	7.66695	1.95016	3.93145	8.44357e-05	0.00682346
esg	334.742	6.33969	1.6194	3.91483	9.04687e-05	0.00726058
Gr10a	244.778	-3.43498	0.877916	-3.91265	9.12899e-05	0.0072763
CG13482	3532.9	9.08109	2.32222	3.91052	9.2099e-05	0.00729085
TwdlC	70.1539	8.21317	2.10201	3.90729	9.33363e-05	0.00733888
CG14946	1617.32	3.3214	0.850736	3.90415	9.45583e-05	0.00738507
CS-2	295.115	6.84285	1.76522	3.87649	0.000105973	0.00822138
CG2663	128.058	7.16971	1.85059	3.87429	0.000106935	0.0082227
run	709.79	-2.81427	0.726594	-3.87323	0.000107403	0.0082227
fd102C	1585.53	4.52115	1.16807	3.8706	0.000108566	0.00825742
CG32599	1432.08	-6.78728	1.75437	-3.86878	0.00010938	0.00826528
NAAT1	5146.75	5.84503	1.51494	3.85827	0.000114195	0.00857345
CG34227	1239.58	6.92039	1.79592	3.8534	0.000116489	0.0086343
PHDP	726.929	-3.7887	0.983024	-3.85413	0.000116141	0.0086343
CG9452	880.174	7.97667	2.07193	3.84988	0.000118175	0.0087038
CG15550	35.0748	7.20498	1.87273	3.84732	0.000119418	0.00874007
CG13731	91.6049	9.98311	2.59741	3.84348	0.0001213	0.0088223
CG31121	171.395	5.84261	1.52122	3.84074	0.000122662	0.00886594
AttD	36.6212	8.65897	2.26378	3.825	0.000130772	0.00939381
Femcoat	121.892	9.02163	2.37141	3.80432	0.000142191	0.0101514
CAH2	12183.3	6.25743	1.64747	3.7982	0.000145751	0.0103421
CG16886	45.4685	6.13261	1.61706	3.79244	0.000149174	0.010467
BicC	203.121	-4.63415	1.22202	-3.79221	0.00014931	0.010467
CG11843	875.334	6.47358	1.71463	3.7755	0.000159688	0.0111275
sut3	45.0111	6.49684	1.72638	3.76328	0.000167697	0.011616
CG3280	2242.86	-4.131	1.09903	-3.75876	0.000170758	0.0117581
Phk-3	71795.6	10.6423	2.83336	3.75607	0.0001726	0.011815
CecC	140.378	6.63002	1.76599	3.75429	0.000173836	0.01183
CG33993	4709.04	-3.67633	0.979646	-3.75271	0.00017493	0.0118352
CG31523	89527	6.09	1.62531	3.74698	0.000178977	0.0120391
CG10300	73.4305	6.99764	1.8711	3.73985	0.000184129	0.0123144
Cyp6g2	10315.8	8.43582	2.25792	3.73611	0.000186888	0.0123569
GstT4	5472.58	5.60724	1.5006	3.73668	0.000186469	0.0123569
CG10140	38.3793	8.72634	2.33759	3.73305	0.000189178	0.0124376
CR43607	51.087	9.13942	2.45581	3.72155	0.000198006	0.0128726
Edg78E	49.213	5.8547	1.57296	3.7221	0.000197571	0.0128726
CG6839	119.056	7.39375	1.98823	3.71876	0.000200203	0.0129431
Pif1A	120.078	-5.43436	1.46397	-3.71207	0.000205567	0.0132165
CG4666	3121.05	6.22182	1.68067	3.702	0.000213906	0.0136771
Obp57c	3441.18	8.81014	2.38198	3.69866	0.000216738	0.0137824
CG11391	271.494	-2.58259	0.702466	-3.67646	0.000236489	0.0149566
CG33970	12433.6	5.948	1.62191	3.66728	0.000245146	0.0154203
CG8306	33644.4	6.39389	1.75036	3.65289	0.000259302	0.0162231
CG10237	10075.6	4.76878	1.30701	3.64862	0.000263651	0.016407
CG2975	71.7515	8.25124	2.26278	3.64651	0.000265825	0.0164333
Obp57a	1166.07	6.29153	1.72585	3.64548	0.000266898	0.0164333
Vdup1	4170.9	6.4387	1.76915	3.63944	0.000273236	0.016735
CG33965	34.9441	8.59091	2.36513	3.63232	0.000280889	0.0171137
cmet	194.82	-4.59574	1.26986	-3.61908	0.00029565	0.0179097
fd96Ca	35.7738	8.63157	2.38581	3.61787	0.000297033	0.0179097
Sans	78.488	5.48762	1.51772	3.61571	0.000299525	0.0179669
Pebp1	32.8646	6.21928	1.72315	3.60925	0.000307084	0.0183258
CR32658	1060.93	-3.83543	1.06701	-3.59455	0.000324956	0.0192934
wbl	165.098	6.36744	1.77903	3.57916	0.000344706	0.0203622
npf	25625.8	-4.37149	1.22229	-3.57649	0.000348239	0.020467
CG13024	640.514	4.69757	1.31501	3.57226	0.000353909	0.0206957
CG10205	92.3407	9.99487	2.80333	3.56536	0.000363359	0.0207275
mtrm	256.912	-2.99539	0.839717	-3.56715	0.00036089	0.0207275
GATAe	155.993	5.46882	1.5335	3.56624	0.000362141	0.0207275
fz3	1081.8	5.32636	1.49384	3.56556	0.000363085	0.0207275
dhd	1755.67	-4.58941	1.28699	-3.56599	0.00036249	0.0207275
slbo	106.594	7.42225	2.08323	3.56285	0.000366847	0.0208244
obst-H	77.5249	9.74225	2.7432	3.55142	0.000383156	0.0216446
pdm2	1240.52	3.80778	1.07836	3.53109	0.000413856	0.0229335
CG12934	1577.92	7.24607	2.05037	3.53403	0.000409279	0.0229335
CG13833	2847.03	4.63739	1.31308	3.53167	0.000412938	0.0229335
CG11409	128.406	10.471	2.96461	3.53201	0.00041242	0.0229335
CG5568	96.7272	-7.46725	2.116	-3.52894	0.000417226	0.0229785
CG8774	50.0264	-6.06994	1.72065	-3.52771	0.000419174	0.0229785
Peritrophin-A	1829.36	8.51513	2.4144	3.52682	0.00042059	0.0229785
Skeletor	1673.03	6.23406	1.77145	3.51917	0.000432893	0.0235401
mwh	170.188	4.52549	1.28749	3.51496	0.000439822	0.0238056
CG14507	26.0395	8.16745	2.32802	3.50832	0.000450945	0.0242076
CG11700	774.447	3.27948	0.934844	3.50805	0.000451409	0.0242076
CG1443	27470.9	8.83757	2.5232	3.50252	0.000460871	0.0246017
CR44185	40.9711	5.9913	1.71246	3.49865	0.000467616	0.0247347
Sp212	413.932	3.97413	1.13567	3.49937	0.000466364	0.0247347
fj	227.85	7.35423	2.10425	3.49494	0.000474176	0.0248558
CG15531	25.8844	8.15877	2.33404	3.49555	0.000473078	0.0248558
ft	243.067	8.24059	2.36	3.49177	0.000479826	0.0249899
CG31910	30.891	-7.0602	2.02248	-3.49086	0.000481465	0.0249899
CG30194	1028.17	7.52087	2.1559	3.4885	0.000485731	0.0249899
CG5639	1032.33	6.5239	1.86974	3.4892	0.000484461	0.0249899
Ppn	17065.8	5.84025	1.6746	3.48755	0.000487472	0.0249899
CG8888	648.276	6.57621	1.89035	3.47883	0.000503615	0.0257042
eIF4E-3	24.9882	8.10828	2.33281	3.47575	0.000509423	0.0258871
CG13562	110.433	-3.24839	0.935612	-3.47194	0.00051671	0.0261433
CG11796	2568.36	4.78568	1.37947	3.46921	0.000521986	0.0262278
CG31321	146.647	6.51401	1.87791	3.46875	0.000522888	0.0262278
Jhe	531.559	8.08799	2.33376	3.46565	0.000528953	0.0264004
bond	33784.5	8.6614	2.49991	3.46468	0.000530866	0.0264004
CG16978	1976.04	3.95515	1.1452	3.45368	0.000553002	0.0273842
Coop	198.777	4.81483	1.39711	3.44628	0.000568357	0.0280253
nimC2	99.76	5.62201	1.63495	3.43864	0.000584639	0.0286795
CG6503	4554.81	-6.56715	1.9103	-3.43776	0.000586554	0.0286795
CG13033	38.1788	-4.74017	1.38082	-3.43286	0.000597244	0.02908
CG12814	8078.94	5.55171	1.61978	3.42744	0.000609299	0.0295434
CG3239	179.94	-10.9357	3.1958	-3.42191	0.000621832	0.030026
vret	49.7187	5.56945	1.62825	3.42052	0.000625013	0.0300549
Kif19A	149.449	2.45453	0.718541	3.41599	0.000635501	0.0304334
CG30093	105.929	8.61061	2.52324	3.41252	0.000643644	0.0305718
Rab9E	50.9315	4.15811	1.21842	3.41271	0.000643195	0.0305718
pncr016:2R	414.791	-6.10917	1.79342	-3.40643	0.000658193	0.0310097
CG3097	28232.9	6.53502	1.91808	3.40706	0.000656655	0.0310097
slam	33.6467	-4.71168	1.38613	-3.39915	0.000675962	0.0312687
dimm	783.414	-2.48237	0.729925	-3.40085	0.000671765	0.0312687
proPO-A1	5112.17	7.35215	2.16178	3.40097	0.000671467	0.0312687
CG15021	3103.53	5.12222	1.50564	3.40202	0.000668887	0.0312687
CG34034	104.123	10.1684	2.99188	3.39868	0.000677125	0.0312687
Cyp4e3	950.762	4.82777	1.42182	3.39549	0.000685069	0.0315105
Cda4	53.0126	6.95297	2.04946	3.39258	0.000692373	0.031721
phm	156.051	9.15443	2.70208	3.38791	0.000704267	0.0321394
CG9400	1289.42	8.61909	2.54536	3.38619	0.000708695	0.0322152
Cys	169.202	6.91877	2.04474	3.38369	0.00071519	0.0322709
chas	871.402	5.28356	1.56153	3.38358	0.000715467	0.0322709
pot	1234.96	5.03814	1.48995	3.38141	0.000721139	0.0324012
Wnt2	81.116	8.43558	2.49728	3.37791	0.000730391	0.0326906
E(spl)malpha-BFM	345.434	8.1871	2.42608	3.37461	0.000739191	0.0329577
CG33281	48.5123	5.53525	1.64487	3.36515	0.000765011	0.0339787
CG15865	903.261	5.65532	1.68157	3.36311	0.000770694	0.034101
CecA1	33.4443	5.69734	1.69478	3.3617	0.000774632	0.0341454
CG4592	158.176	5.93223	1.76559	3.35991	0.000779674	0.0341902
retn	4050.03	4.52125	1.34591	3.35926	0.000781523	0.0341902
Zw	2461.51	5.58943	1.66583	3.35534	0.000792663	0.0345477
Gr64f	213.893	-5.57023	1.66169	-3.35215	0.000801867	0.0346889
CG5107	176.412	4.25381	1.26862	3.3531	0.000799104	0.0346889
CG15824	29.5332	6.95617	2.07645	3.35003	0.000808026	0.0346974
obst-E	4558.46	5.62095	1.67756	3.35068	0.000806138	0.0346974
CG6209	127.027	-4.16996	1.24539	-3.34832	0.00081304	0.0347844
CecA2	26.9591	8.21622	2.45861	3.34181	0.000832325	0.035479
CG17672	36.4498	8.65172	2.59216	3.33765	0.000844907	0.0356239
CG14572	102.944	4.61642	1.38295	3.33809	0.000843576	0.0356239
alphagamma-element:CR32865	439.672	4.41659	1.32274	3.33896	0.000840917	0.0356239
CG1791	887.276	7.99428	2.39765	3.33422	0.000855394	0.0359358
CG9673	49.6452	4.89695	1.47753	3.31428	0.000918794	0.0384605
CR44208	114.327	-2.6999	0.815229	-3.31183	0.000926878	0.0386598
CG31199	1817.75	4.46361	1.3489	3.30908	0.00093602	0.0389016
CG18367	1101.64	-7.37044	2.23062	-3.30421	0.000952454	0.0392772
gnu	86.5964	-3.26587	0.988636	-3.30341	0.000955181	0.0392772
CG32750	53.657	7.64752	2.31393	3.30499	0.000949787	0.0392772
CG31675	70.506	3.33133	1.0097	3.29933	0.000969174	0.0394345
CR43723	39.7091	6.10361	1.84971	3.29978	0.000967623	0.0394345
PebIII	108328	5.56721	1.68692	3.30021	0.00096611	0.0394345
CG11073	1137.58	6.48644	1.97003	3.29256	0.000992789	0.0402546
bowl	1358.03	7.22973	2.19856	3.28839	0.00100762	0.0405733
qsm	1667	5.1782	1.57435	3.28911	0.00100505	0.0405733
CG30378	78.8068	-3.59067	1.09602	-3.27611	0.00105249	0.042234
Osi9	303.904	6.21644	1.89964	3.27243	0.00106628	0.042494
Poxm	42.3617	7.48744	2.28767	3.27296	0.00106428	0.042494
CG14036	89.8454	-5.57102	1.70301	-3.27127	0.00107064	0.0425223
exex	2174.96	-3.56968	1.09331	-3.26502	0.00109456	0.0433245
CG4115	3755.85	8.61699	2.64112	3.26263	0.00110385	0.043544
CG10970	1969.67	4.83717	1.48468	3.25805	0.00112179	0.0441023
sas	2187.37	7.5697	2.32643	3.25378	0.00113881	0.0444707
sxe2	4102.42	7.75801	2.38372	3.25458	0.00113558	0.0444707
gk	1097.97	5.78782	1.77985	3.25186	0.00114651	0.0444997
CG14695	429.804	-2.28576	0.702945	-3.25169	0.0011472	0.0444997
CG32228	21.5591	6.49932	2.00338	3.24418	0.0011779	0.045539
pncr004:X	42.5394	8.87518	2.73734	3.24227	0.00118583	0.0456937
CG14072	112.696	2.58112	0.797416	3.23685	0.00120855	0.0463649
Prat2	2352.6	-7.22454	2.2324	-3.23623	0.00121122	0.0463649
CG2233	30895	-7.00852	2.16772	-3.23313	0.00122441	0.0467163
Ir31a	20.168	7.80253	2.41912	3.22535	0.00125817	0.0476916
CG13488	23.834	8.03839	2.49163	3.22615	0.00125466	0.0476916
CG34115	439.925	7.81626	2.42594	3.22195	0.00127323	0.04795
Or85f	66.287	3.36451	1.04421	3.22206	0.00127271	0.04795
CG32532	1265.72	1.97421	0.613006	3.22053	0.00127952	0.0480316
Oatp26F	24.2016	5.78474	1.79895	3.21562	0.00130161	0.0487037
kni	530.821	4.88976	1.52115	3.21452	0.00130661	0.048734
CG9717	432.892	5.95892	1.85548	3.21152	0.00132034	0.0490887
