# Supplementary material for: Striking circadian neuron diversity and cycling of Drosophila alternative splicing
Source: eLife journal article supplement (doi:10.7554/elife.35618), 2018-06-04
Supplement: supp [file elife-35618-supp-v1.zip › elife_poa_e35618_Figure_3_source_data_9.xlsx]

## Sheet: PDF_vs_TH_qvalue_0_05
	baseMean	log2FoldChange	lfcSE	stat	pvalue	padj
CG6409	60002.1	10.4743	0.872654	12.0028	3.43315e-33	4.13901e-29
CG14075	15448	-5.72653	0.487036	-11.7579	6.42963e-32	3.87578e-28
CG34324	393415	13.5023	1.1782	11.4601	2.09175e-30	6.99631e-27
CG43673	44758.5	16.6601	1.45489	11.4511	2.32127e-30	6.99631e-27
Muc68D	307619	12.9848	1.15087	11.2826	1.59884e-29	3.29597e-26
Idgf4	12538.5	9.41247	0.834411	11.2804	1.64033e-29	3.29597e-26
Gr43a	3207.05	-5.6894	0.512301	-11.1056	1.17854e-28	2.02978e-25
Cyp6g2	11382.4	9.57022	0.880014	10.8751	1.51529e-27	2.28354e-24
jhamt	12188.4	17.1993	1.58965	10.8196	2.78057e-27	3.72473e-24
dimm	6747.17	-5.66018	0.527041	-10.7395	6.63675e-27	7.27388e-24
CG11672	10696.4	14.5691	1.35597	10.7445	6.29314e-27	7.27388e-24
CG3906	126202	14.8766	1.42849	10.4142	2.13568e-25	2.12807e-22
CG14292	1740.63	-10.6812	1.02631	-10.4074	2.2947e-25	2.12807e-22
Drsl5	5667.37	11.0843	1.06836	10.3751	3.21983e-25	2.77273e-22
CG34220	785220	11.7102	1.14335	10.242	1.28572e-24	1.03338e-21
CG4783	31361.5	10.2025	1.01853	10.0169	1.28499e-23	9.68237e-21
CG5162	951.578	10.0775	1.02224	9.85829	6.3114e-23	4.4759e-20
Dms	276068	4.80259	0.493371	9.73424	2.15413e-22	1.44279e-19
CG31954	1473.9	-5.42021	0.572795	-9.46273	3.00003e-21	1.9036e-18
CG12541	38737.2	-4.89672	0.520437	-9.40886	5.01538e-21	3.02327e-18
mthl8	2705.65	-14.71	1.57466	-9.34172	9.47807e-21	5.44131e-18
Che-13	3041.46	-7.03214	0.75774	-9.2804	1.68839e-20	9.2524e-18
Drs	20922	8.07313	0.921941	8.75667	2.01105e-18	1.05414e-15
CG10178	524.431	5.32702	0.612128	8.70245	3.24784e-18	1.6315e-15
Crz	2147.49	7.83516	0.901111	8.695	3.46843e-18	1.67262e-15
CG5506	19917.5	15.5052	1.81565	8.53978	1.34473e-17	6.23543e-15
CG14237	2609.17	-5.84115	0.686755	-8.50543	1.80918e-17	8.07833e-15
Cpr50Cb	2393.98	-6.11371	0.725995	-8.42114	3.72832e-17	1.60531e-14
CG31077	79696.3	15.0749	1.79697	8.38903	4.9018e-17	2.03779e-14
CG10345	4968.57	12.4612	1.48853	8.37153	5.68767e-17	2.28569e-14
Ilp3	2653.87	-6.55298	0.785976	-8.33738	7.59559e-17	2.95395e-14
CG12278	982.675	-4.77752	0.574218	-8.32005	8.79235e-17	3.31252e-14
Cht8	20117	9.37582	1.12808	8.31132	9.46413e-17	3.38319e-14
to	43693.4	14.4948	1.74419	8.31036	9.54119e-17	3.38319e-14
net	2817.27	-5.27865	0.638862	-8.26258	1.42554e-16	4.91036e-14
CG31313	3791.79	12.5287	1.53253	8.17516	2.95479e-16	9.89526e-14
CG15909	1429.03	-4.33936	0.536063	-8.09487	5.73235e-16	1.86782e-13
CG16978	2025.73	14.6101	1.81898	8.03206	9.58459e-16	3.04084e-13
opa	3372.43	-4.14724	0.519743	-7.97939	1.47058e-15	4.54598e-13
CG9988	1091.09	11.2499	1.4134	7.95946	1.72799e-15	5.20815e-13
AlCR2	16597.7	-4.32431	0.545696	-7.92439	2.29277e-15	6.74185e-13
CG4757	22463.1	12.6213	1.60976	7.84051	4.48735e-15	1.28808e-12
CG17777	32426.3	-6.25514	0.798848	-7.8302	4.87082e-15	1.36564e-12
Tbh	46727.9	-5.24756	0.672473	-7.80338	6.0269e-15	1.65137e-12
Pdf	1.09749e+07	-11.7502	1.51123	-7.77525	7.52956e-15	2.01725e-12
sxe2	4451.9	9.77975	1.25921	7.76659	8.06263e-15	2.11311e-12
CG6426	1008.24	6.10805	0.78827	7.74868	9.28544e-15	2.38182e-12
CG10560	470.709	12.5044	1.62653	7.68778	1.49705e-14	3.76009e-12
Anp	602.616	-11.1859	1.45966	-7.6634	1.81081e-14	4.45534e-12
CG9313	4953.51	-7.53173	0.983321	-7.65949	1.86679e-14	4.50119e-12
CG42821	746.63	13.1698	1.72547	7.63259	2.30089e-14	5.43913e-12
PebIII	115816	9.00439	1.18469	7.60066	2.94635e-14	6.831e-12
bond	36657.5	17.3592	2.29723	7.5566	4.13748e-14	9.4116e-12
Kaz-m1	2944.84	10.766	1.42788	7.53985	4.70508e-14	1.05045e-11
npf	29717.7	-4.45183	0.591626	-7.52474	5.28243e-14	1.15791e-11
CG15646	291.978	-8.34318	1.11163	-7.50533	6.12749e-14	1.31916e-11
CG15865	966.341	10.501	1.40388	7.48003	7.43059e-14	1.57164e-11
CG8306	36201.5	10.64	1.4252	7.46566	8.28811e-14	1.72278e-11
CG30151	2070.92	14.642	1.96579	7.4484	9.44796e-14	1.93059e-11
CG5867	2982.14	13.7344	1.84642	7.43836	1.01941e-13	2.04833e-11
Drsl4	1793.24	11.0385	1.48796	7.4186	1.18369e-13	2.33943e-11
dy	477.147	-5.09218	0.689446	-7.38591	1.51419e-13	2.94436e-11
Obp57c	3737.84	11.2337	1.53205	7.33244	2.25998e-13	4.32482e-11
CG5945	20727	10.5027	1.43883	7.29949	2.88867e-13	5.44153e-11
Sytbeta	91714.2	-4.56368	0.625648	-7.29432	3.00171e-13	5.48313e-11
ind	508.885	-4.51878	0.619488	-7.29437	3.0006e-13	5.48313e-11
CG33110	1183.75	10.4373	1.44071	7.2446	4.3373e-13	7.80455e-11
CG7675	3519.04	13.0038	1.80283	7.213	5.4731e-13	9.70349e-11
verm	3484.92	10.8423	1.50395	7.20923	5.62688e-13	9.83155e-11
CG9747	6183.24	13.2431	1.8398	7.19812	6.10471e-13	1.05141e-10
Cyp313a1	20213.2	12.2363	1.70808	7.16376	7.84933e-13	1.33284e-10
CG2781	3131.64	12.2584	1.71911	7.13068	9.98756e-13	1.67236e-10
CG6074	1353.04	7.28056	1.0282	7.0809	1.43224e-12	2.36535e-10
comm2	1130.61	10.0327	1.41933	7.06864	1.56462e-12	2.51508e-10
CG17121	455.25	6.74707	0.954294	7.07022	1.54684e-12	2.51508e-10
CG8539	277.623	11.7424	1.66968	7.03274	2.02511e-12	3.21247e-10
Peb	121.619	-23.714	3.37888	-7.01832	2.24548e-12	3.51577e-10
CG34261	796.995	-3.73919	0.534094	-7.00099	2.54155e-12	3.92832e-10
sad	4853.98	10.5895	1.51579	6.98609	2.82649e-12	4.31343e-10
CG9335	19616	-4.01046	0.575827	-6.9647	3.29105e-12	4.95961e-10
CG18747	958.567	10.1332	1.4585	6.94769	3.71307e-12	5.52651e-10
IM3	13196.3	10.778	1.55345	6.93811	3.97384e-12	5.84252e-10
CG34452	622.956	12.9085	1.86383	6.9258	4.33528e-12	6.29712e-10
IM1	26488.6	11.2452	1.62614	6.91528	4.6695e-12	6.70184e-10
CG11147	16911.4	11.0466	1.60822	6.86884	6.47252e-12	9.18032e-10
Obp56d	33715.6	10.3996	1.51455	6.86642	6.58349e-12	9.22913e-10
CG9928	3504.55	13.0006	1.89381	6.86476	6.66048e-12	9.22974e-10
Ag5r	5139.55	4.02789	0.588767	6.84123	7.85136e-12	1.07564e-09
IFa	5931.83	7.56357	1.10594	6.83905	7.9718e-12	1.07987e-09
Zw	2632.65	8.59748	1.26449	6.79915	1.05237e-11	1.40971e-09
CG13321	6786.16	11.173	1.64491	6.79246	1.10235e-11	1.46044e-09
pdm2	1272.73	7.7939	1.15976	6.72026	1.81396e-11	2.37708e-09
Fer2	18366.4	-4.30518	0.641812	-6.70785	1.97507e-11	2.5582e-09
Pgd	2245.99	7.08307	1.05616	6.70642	1.99462e-11	2.5582e-09
CG9452	954.939	13.525	2.02445	6.68085	2.37559e-11	3.01475e-09
l(2)34Fc	752.623	7.38054	1.10965	6.65125	2.90618e-11	3.64968e-09
CG6421	1149.75	11.3867	1.71956	6.62189	3.54638e-11	4.40775e-09
alpha-Est1	812.734	9.03048	1.36653	6.60832	3.88705e-11	4.78186e-09
CG40006	912.874	8.35558	1.26969	6.5808	4.67912e-11	5.64114e-09
emp	61499.8	9.93282	1.50924	6.58135	4.662e-11	5.64114e-09
CG15347	720.423	8.72965	1.33062	6.56057	5.36014e-11	6.3982e-09
CG43117	7099.87	-5.51489	0.844122	-6.53329	6.43418e-11	7.60495e-09
CG1889	377.57	7.74871	1.18731	6.52629	6.74173e-11	7.8911e-09
CG13248	68416.3	-3.30013	0.506787	-6.51187	7.42223e-11	8.60407e-09
ple	34892.8	5.48021	0.845278	6.48332	8.97252e-11	1.03022e-08
CG8630	971.243	9.16366	1.41721	6.46597	1.00649e-10	1.14474e-08
Tsf1	20904.1	4.93416	0.764231	6.45638	1.0724e-10	1.20831e-08
Cyp6a17	1098.46	9.34228	1.45049	6.44076	1.18873e-10	1.32698e-08
Cht9	6787.35	5.29177	0.821871	6.43869	1.20511e-10	1.33292e-08
Pdh	3964.87	4.69071	0.73061	6.42026	1.36041e-10	1.491e-08
CG18480	374.927	12.1756	1.89839	6.41368	1.4205e-10	1.54284e-08
CG30411	462.876	12.4798	1.9466	6.41111	1.44467e-10	1.55508e-08
Hr51	6188.86	-3.97806	0.621256	-6.40326	1.52096e-10	1.62272e-08
Tsp42Ei	1298.5	9.50733	1.48625	6.39687	1.58594e-10	1.6772e-08
CR44165	3287.65	-3.78662	0.593317	-6.38213	1.74646e-10	1.8309e-08
CG13054	26152	-6.50475	1.02021	-6.37589	1.81898e-10	1.89048e-08
pgant4	12065.6	6.53138	1.02748	6.35668	2.06161e-10	2.12434e-08
CG14568	87.0327	22.2451	3.51302	6.33219	2.41703e-10	2.46947e-08
CG13654	10230.7	-2.93736	0.464881	-6.31853	2.64069e-10	2.67531e-08
CG33958	4498.82	-3.09114	0.491601	-6.2879	3.21785e-10	3.23287e-08
CG5321	190.445	5.54668	0.882927	6.28214	3.33935e-10	3.3272e-08
CG32694	9050.08	10.5831	1.69053	6.26022	3.84425e-10	3.79887e-08
pinta	465.157	4.56731	0.730169	6.25515	3.97143e-10	3.89264e-08
CG2254	9995.31	8.64014	1.38382	6.24368	4.27403e-10	4.15546e-08
CG9631	458.246	12.4654	1.99737	6.24088	4.35129e-10	4.19673e-08
Fst	1270.58	8.96053	1.4364	6.23821	4.42616e-10	4.23507e-08
Sdic3	278.979	10.3135	1.65582	6.22862	4.70576e-10	4.46713e-08
CG13704	1173.49	9.85148	1.5823	6.22607	4.78293e-10	4.50492e-08
CG33970	13357	8.35724	1.34616	6.20821	5.35906e-10	5.00843e-08
Lsd-1	1707.63	6.42746	1.03611	6.20345	5.52396e-10	5.12284e-08
CG3280	1725.78	-3.57443	0.576341	-6.20193	5.57734e-10	5.13286e-08
IM23	9010.97	12.0678	1.94828	6.1941	5.86192e-10	5.35389e-08
CG3829	449.516	7.21238	1.17133	6.15742	7.39374e-10	6.70217e-08
CG13229	5784.46	-2.97581	0.483604	-6.1534	7.5839e-10	6.7727e-08
Cyp6d2	727.632	8.5771	1.39372	6.15409	7.55096e-10	6.7727e-08
CG13422	1901.92	10.1389	1.64804	6.15207	7.648e-10	6.77973e-08
drm	6865.81	10.912	1.77678	6.14146	8.17673e-10	7.18272e-08
CG31326	1023.26	10.2335	1.66654	6.14059	8.22176e-10	7.18272e-08
IM2	17698	11.5053	1.87445	6.13794	8.3599e-10	7.25086e-08
spz3	1812.21	12.0508	1.96528	6.13183	8.68756e-10	7.48123e-08
Tektin-C	3231.11	6.69397	1.09337	6.12235	9.22067e-10	7.884e-08
CG1441	1226.57	8.52674	1.39324	6.1201	9.35168e-10	7.93971e-08
Dh31-R1	14899.1	-3.04101	0.499052	-6.09357	1.10421e-09	9.30931e-08
CG8303	872.815	10.414	1.70942	6.09213	1.1142e-09	9.32831e-08
Mmp2	44486.3	-4.00998	0.659993	-6.0758	1.23372e-09	1.02578e-07
CG31675	2301.04	-4.98703	0.822212	-6.06538	1.31645e-09	1.07967e-07
CG15096	294.024	10.3878	1.71245	6.06605	1.31098e-09	1.07967e-07
CG17350	593.874	12.8396	2.11727	6.06423	1.32587e-09	1.08005e-07
CG31207	763.396	11.7692	1.94519	6.0504	1.44486e-09	1.16907e-07
CG33109	767.757	13.2103	2.1875	6.03899	1.55083e-09	1.24645e-07
Cyp6a21	336.293	6.86632	1.13903	6.02823	1.6576e-09	1.32344e-07
CG31103	635.857	7.14688	1.18584	6.02684	1.67197e-09	1.32614e-07
CG13077	414.167	8.34084	1.38644	6.01603	1.7875e-09	1.40851e-07
Tsp42Eo	2074.48	-6.63263	1.10626	-5.99552	2.02838e-09	1.57769e-07
CG34120	839.343	9.94717	1.6589	5.99623	2.01949e-09	1.57769e-07
LM408	2704.31	3.55466	0.594311	5.98115	2.21572e-09	1.70276e-07
Obp57a	1254.01	9.92842	1.66003	5.98085	2.21975e-09	1.70276e-07
CG14238	1446.49	-5.86681	0.981074	-5.97999	2.23156e-09	1.70276e-07
Dbi	8324.25	7.24794	1.21259	5.97726	2.26925e-09	1.72063e-07
Est-6	4228.72	8.05167	1.35327	5.94981	2.68452e-09	2.01022e-07
CG11550	2100.52	10.6961	1.79764	5.95008	2.68014e-09	2.01022e-07
CG9451	2615.11	11.0132	1.85209	5.94637	2.7416e-09	2.04029e-07
Cyp4d20	908.03	7.39214	1.24659	5.92988	3.03152e-09	2.24221e-07
CG14985	399.785	3.82436	0.64597	5.92033	3.21303e-09	2.36197e-07
Drip	664.785	3.6454	0.616267	5.9153	3.31262e-09	2.41572e-07
CG9812	2205.49	8.77354	1.48361	5.91364	3.34626e-09	2.41572e-07
Skeletor	1805.25	7.85357	1.32782	5.91462	3.32637e-09	2.41572e-07
CG9990	12021.6	7.78492	1.3211	5.89277	3.79782e-09	2.72539e-07
Cyp4d8	294.366	10.3903	1.76496	5.887	3.93268e-09	2.80547e-07
a	1227.42	2.87761	0.489798	5.8751	4.22601e-09	2.99698e-07
Cyp6a14	384.266	12.2113	2.08307	5.86216	4.56893e-09	3.2025e-07
Cyp6d5	4678.29	6.22628	1.06209	5.86229	4.56516e-09	3.2025e-07
cry	52757.5	-4.0734	0.695538	-5.85647	4.72804e-09	3.29487e-07
CG34437	204.994	9.85361	1.68592	5.84464	5.07656e-09	3.51742e-07
Cpr62Bb	216.914	9.94829	1.70439	5.83686	5.31932e-09	3.66456e-07
E(spl)mbeta-HLH	3655.72	7.39385	1.27004	5.82172	5.82451e-09	3.98979e-07
CG30438	639.249	9.47435	1.62803	5.81952	5.90174e-09	4.01985e-07
Nmdmc	17485.8	-3.74819	0.644782	-5.81311	6.13235e-09	4.15346e-07
CG34342	936.309	-5.84188	1.00719	-5.80017	6.62489e-09	4.45384e-07
CG5791	10915.9	10.9467	1.88751	5.79954	6.64973e-09	4.45384e-07
CG15539	201.228	9.84295	1.70022	5.7892	7.07207e-09	4.71054e-07
CG11854	1439.37	11.7199	2.02636	5.7837	7.30743e-09	4.84057e-07
IM14	5449.02	11.205	1.938	5.78173	7.39377e-09	4.871e-07
CG4525	875.19	-4.38377	0.758674	-5.77819	7.55069e-09	4.94734e-07
CG32633	1379.38	8.87073	1.53578	5.77606	7.64715e-09	4.98346e-07
Cht5	215.214	4.63156	0.802267	5.7731	7.78282e-09	5.04461e-07
psh	467.762	10.0891	1.7496	5.76651	8.09311e-09	5.21768e-07
CG13482	3846.45	8.78715	1.52571	5.75939	8.44169e-09	5.41346e-07
hoe2	17227	-3.28457	0.571244	-5.74986	8.93189e-09	5.69751e-07
CG31004	2003.23	7.16761	1.25015	5.7334	9.84354e-09	6.24598e-07
CG34236	251.656	11.6002	2.0241	5.73105	9.98106e-09	6.26727e-07
CG40485	214.61	9.91839	1.73059	5.73122	9.97092e-09	6.26727e-07
Cht4	2357.9	6.52673	1.13908	5.72982	1.00535e-08	6.28008e-07
Ccap	1490	10.6656	1.86172	5.72886	1.01106e-08	6.28315e-07
aru	313.911	4.81345	0.840343	5.72796	1.01645e-08	6.28427e-07
Cyp6a20	4282.36	10.3179	1.80497	5.71637	1.08821e-08	6.69359e-07
CG8128	9026.75	-3.41211	0.597257	-5.71297	1.11024e-08	6.79446e-07
CG14565	363.934	-7.07109	1.23792	-5.71207	1.1161e-08	6.7958e-07
Tsp29Fb	6036.3	5.78957	1.01438	5.70748	1.14662e-08	6.94655e-07
LysP	1278.09	12.5159	2.19513	5.70167	1.18643e-08	7.15178e-07
Ude	158.712	7.18662	1.26135	5.69757	1.2153e-08	7.28938e-07
CG18745	1165.04	7.8426	1.37938	5.68561	1.30346e-08	7.77945e-07
atilla	5709.35	10.6463	1.87441	5.67981	1.34841e-08	8.00807e-07
CG1561	251.597	4.89224	0.86386	5.66323	1.48549e-08	8.77894e-07
CG31199	1911.54	6.8006	1.20167	5.65929	1.52003e-08	8.93925e-07
modSP	1794.04	9.35838	1.6542	5.65736	1.53719e-08	8.99627e-07
CG6429	1059.84	9.29406	1.64378	5.65409	1.56673e-08	9.08099e-07
Ugt86Da	2608.63	6.76652	1.1967	5.6543	1.56482e-08	9.08099e-07
CG30083	505.951	12.6085	2.23146	5.65031	1.6016e-08	9.23872e-07
Tsp29Fa	937.158	7.4442	1.31875	5.6449	1.65276e-08	9.44345e-07
CG15739	568.574	7.69235	1.3627	5.64491	1.65264e-08	9.44345e-07
CG8160	300.696	-3.52161	0.624266	-5.6412	1.68872e-08	9.60341e-07
Cyp4d21	3055.34	8.82595	1.56612	5.63554	1.74509e-08	9.87738e-07
CS-2	322.883	6.64182	1.1816	5.62103	1.89825e-08	1.0694e-06
fus	6061.92	8.3832	1.49433	5.60999	2.02341e-08	1.13462e-06
CG8852	290.571	-5.6011	0.999124	-5.60602	2.07035e-08	1.15556e-06
CG9850	460.353	6.39128	1.14336	5.58993	2.27157e-08	1.26203e-06
CG9312	426.085	7.37635	1.3207	5.58518	2.33457e-08	1.29108e-06
nahoda	1129.21	6.53753	1.17072	5.58421	2.34766e-08	1.29239e-06
Cyp4e3	1003.85	8.28365	1.48419	5.58127	2.38775e-08	1.30849e-06
tgy	979.967	5.84779	1.04892	5.57504	2.47478e-08	1.35004e-06
CG8925	1925.32	8.68928	1.56296	5.55951	2.70537e-08	1.46918e-06
kni	559.229	11.3211	2.04153	5.5454	2.93282e-08	1.58556e-06
tim	59457.2	-3.3763	0.60923	-5.54192	2.99165e-08	1.61015e-06
CG4000	873.049	5.61084	1.0161	5.52196	3.3524e-08	1.79629e-06
Cyp4aa1	3775.7	9.09184	1.65145	5.50537	3.68385e-08	1.96515e-06
CG10237	10640.6	7.85505	1.43071	5.49033	4.0119e-08	2.13072e-06
capaR	166.103	7.27666	1.32579	5.48853	4.05282e-08	2.14043e-06
CG14696	4950.14	-4.35039	0.792713	-5.48798	4.06567e-08	2.14043e-06
Spn27A	3343.4	7.04064	1.28418	5.48261	4.19102e-08	2.18935e-06
CR43785	92.3383	7.12551	1.2997	5.48244	4.19492e-08	2.18935e-06
mthl10	4254.2	7.92907	1.45094	5.46479	4.63459e-08	2.40839e-06
CG5966	210.191	8.92857	1.63588	5.45797	4.81602e-08	2.49193e-06
CG42246	133.932	9.25203	1.69631	5.45419	4.91959e-08	2.53464e-06
CG13445	141.116	-5.01752	0.92088	-5.44862	5.0763e-08	2.60425e-06
Elo68alpha	336.459	12.0196	2.20846	5.44254	5.25272e-08	2.68334e-06
Gp150	24448.6	7.44257	1.36778	5.44134	5.28807e-08	2.69e-06
lcs	15450.5	8.9959	1.65367	5.43995	5.32944e-08	2.69965e-06
CG1791	961.758	12.0724	2.22081	5.43601	5.44879e-08	2.74856e-06
CG5835	1444.74	4.18665	0.771559	5.42623	5.75573e-08	2.89129e-06
CG14259	1306.32	7.01947	1.29495	5.42063	5.93891e-08	2.97093e-06
Pdfr	5774.48	-3.48985	0.644963	-5.41093	6.26991e-08	3.12355e-06
Osi24	5786.96	8.38253	1.55076	5.40544	6.46513e-08	3.20755e-06
CG18302	95.2945	10.1984	1.88829	5.40087	6.63194e-08	3.27683e-06
CG9095	1894.47	8.28861	1.53736	5.39147	6.98829e-08	3.43881e-06
CG34288	286.164	11.7859	2.19265	5.37517	7.65117e-08	3.74086e-06
CG33099	739.619	8.31565	1.54714	5.37486	7.66418e-08	3.74086e-06
CG5921	726.101	6.72893	1.25285	5.37092	7.83371e-08	3.8082e-06
CG7255	140.598	7.76805	1.44653	5.37014	7.86762e-08	3.80932e-06
CG42262	1906.28	9.82458	1.83446	5.35556	8.52927e-08	4.11315e-06
CG3835	766.954	4.06761	0.76043	5.3491	8.83931e-08	4.24569e-06
odd	3035.7	9.82122	1.83876	5.34123	9.23192e-08	4.4135e-06
CG16836	660.706	7.18368	1.3451	5.34064	9.26192e-08	4.4135e-06
Cyp9b1	175.774	5.60014	1.05003	5.33331	9.64376e-08	4.57737e-06
CG6425	1922.09	-3.72147	0.698803	-5.32548	1.00685e-07	4.76023e-06
CG18635	396.088	10.8229	2.03307	5.32346	1.01814e-07	4.77616e-06
CG5404	493.977	4.43883	0.833775	5.32378	1.01635e-07	4.77616e-06
Wnt6	308.131	5.67232	1.0671	5.31565	1.06275e-07	4.96609e-06
CG2930	1387.21	6.84787	1.28924	5.31155	1.08696e-07	5.05959e-06
CG11125	1485.28	-3.71646	0.700532	-5.30519	1.12553e-07	5.19901e-06
CG43091	1501.45	9.99184	1.8833	5.3055	1.12364e-07	5.19901e-06
Tep2	2610.72	4.71692	0.890096	5.29934	1.16225e-07	5.34813e-06
CG31689	1969.06	4.66841	0.881724	5.29464	1.19252e-07	5.46656e-06
king-tubby	8475.95	-2.83969	0.537289	-5.28522	1.25553e-07	5.7336e-06
CG10026	2512.44	8.95689	1.69587	5.28159	1.28071e-07	5.81584e-06
CG8560	251.057	6.79358	1.28636	5.28123	1.28319e-07	5.81584e-06
CG13833	3018.19	6.37354	1.20778	5.27705	1.31279e-07	5.92774e-06
CG13067	189.885	11.1965	2.12377	5.27203	1.34926e-07	6.06966e-06
CG7341	133.461	6.18306	1.17311	5.27066	1.35932e-07	6.09217e-06
CG6045	1724.96	6.29403	1.19527	5.26581	1.39576e-07	6.23231e-06
CG8888	752.444	3.96786	0.75379	5.26388	1.41048e-07	6.27479e-06
CG16799	899.702	7.34266	1.39572	5.26083	1.43407e-07	6.35629e-06
sced	10859.3	-2.85143	0.542276	-5.25826	1.45422e-07	6.42202e-06
Sp212	428.695	6.71773	1.2805	5.24619	1.55277e-07	6.83219e-06
CG12934	1718.34	8.29776	1.58202	5.24505	1.5624e-07	6.84955e-06
vanin-like	1296.91	7.94651	1.51533	5.2441	1.57049e-07	6.8601e-06
dan	632.032	3.06552	0.584756	5.2424	1.58502e-07	6.89855e-06
CG15152	517.498	7.92139	1.51592	5.22545	1.73731e-07	7.53415e-06
CG30194	1119.33	7.66437	1.4675	5.22272	1.76309e-07	7.61859e-06
CG10725	580.338	7.61636	1.45986	5.21717	1.81679e-07	7.82257e-06
tw	210.251	11.3408	2.17639	5.21085	1.87973e-07	8.06478e-06
CG14780	291.36	5.46001	1.05509	5.17495	2.27972e-07	9.74619e-06
CG30197	14135.9	5.99503	1.1588	5.17349	2.29767e-07	9.76333e-06
PGRP-LF	387.591	4.67899	0.90445	5.1733	2.29992e-07	9.76333e-06
CG14439	8953.45	7.63736	1.47855	5.16543	2.39891e-07	1.01478e-05
CG11841	2970.29	9.70277	1.87907	5.16359	2.42257e-07	1.02121e-05
CG10031	114.253	8.04295	1.5583	5.16137	2.45145e-07	1.02978e-05
CR43454	443.444	-4.36709	0.846368	-5.1598	2.47213e-07	1.03486e-05
CG15155	9820.42	10.1815	1.9742	5.15728	2.50568e-07	1.04528e-05
CG13606	212.637	11.3572	2.20497	5.15071	2.59506e-07	1.07883e-05
sv	2099.7	2.73361	0.530976	5.14828	2.62893e-07	1.08915e-05
DmsR-1	8966.73	-2.81131	0.546301	-5.14609	2.65977e-07	1.09816e-05
CG13748	929.666	10.1011	1.96543	5.1394	2.75622e-07	1.1341e-05
laza	1705.03	6.07731	1.18656	5.1218	3.02638e-07	1.24102e-05
Hmgs	12301.8	2.8372	0.554139	5.12001	3.05515e-07	1.24857e-05
Snmp1	171.629	4.5787	0.894861	5.11666	3.10999e-07	1.26669e-05
GstE6	4272.27	5.60677	1.09596	5.11586	3.12314e-07	1.26777e-05
CG11400	1937.75	8.36506	1.63561	5.11434	3.14844e-07	1.26988e-05
CG5704	251.23	8.20129	1.60361	5.11428	3.14942e-07	1.26988e-05
CG14160	193.566	11.2215	2.19486	5.11262	3.17729e-07	1.27685e-05
Reg-2	730.469	8.17326	1.60004	5.10816	3.25314e-07	1.30298e-05
Ance	2738.52	7.58069	1.48596	5.10155	3.36879e-07	1.33599e-05
CG10479	2252.58	-2.58206	0.506093	-5.10196	3.36155e-07	1.33599e-05
CG43092	3810.75	9.23905	1.81102	5.10159	3.36819e-07	1.33599e-05
Mco1	241.268	7.48377	1.46718	5.10079	3.38232e-07	1.33696e-05
CG15649	5015.7	8.24515	1.61694	5.09922	3.41049e-07	1.34369e-05
Inx3	5304.36	5.60865	1.10252	5.08713	3.63525e-07	1.42757e-05
Hml	6933.47	4.02756	0.79267	5.081	3.75452e-07	1.46962e-05
CG13594	37139.7	-2.93052	0.57717	-5.0774	3.82637e-07	1.4929e-05
CG13639	71.3489	9.78475	1.92787	5.07542	3.86639e-07	1.50365e-05
CG13741	179.481	-5.08391	1.00287	-5.06937	3.99145e-07	1.5473e-05
Mtk	518.392	5.21299	1.02893	5.06644	4.05319e-07	1.56619e-05
Peritrophin-A	1993.52	7.83376	1.54791	5.06087	4.17347e-07	1.60752e-05
pio	7836.16	7.63411	1.51041	5.05434	4.31887e-07	1.65823e-05
fdy	129.41	-5.43943	1.07806	-5.04556	4.52189e-07	1.73066e-05
Tollo	1086.91	7.44657	1.47688	5.04208	4.60489e-07	1.75468e-05
CG31345	16764.9	-2.37242	0.470614	-5.04111	4.62832e-07	1.75468e-05
Ykt6	17725.9	-2.34795	0.465751	-5.04122	4.62577e-07	1.75468e-05
decay	381.65	7.49293	1.48817	5.03499	4.77883e-07	1.80607e-05
retn	4275.27	6.48693	1.28913	5.03202	4.8535e-07	1.82855e-05
RNaseMRP:RNA	763.583	-2.80877	0.559037	-5.0243	5.05284e-07	1.89773e-05
CG18641	629.724	11.4951	2.28895	5.02199	5.11385e-07	1.91076e-05
CG10553	469.13	7.30833	1.45532	5.02179	5.11924e-07	1.91076e-05
Cyp4e2	1072.96	7.99434	1.59363	5.01645	5.26347e-07	1.95853e-05
Tdc2	17281	-4.10676	0.819005	-5.01432	5.32205e-07	1.97424e-05
CR44150	489.762	-4.91378	0.980222	-5.01292	5.36088e-07	1.98254e-05
CG3097	30455.4	8.94924	1.78855	5.00364	5.62592e-07	2.07419e-05
Best2	2612.06	9.35692	1.87059	5.00211	5.67057e-07	2.08428e-05
CG34045	396.765	5.436	1.08765	4.99795	5.79431e-07	2.12329e-05
CG8740	923.903	5.3242	1.06713	4.98926	6.06111e-07	2.20763e-05
mfas	26838.2	4.91413	0.984896	4.9895	6.05369e-07	2.20763e-05
NAAT1	5537.93	7.51617	1.50904	4.98076	6.33335e-07	2.29984e-05
CG32751	97.8372	7.78614	1.56376	4.97911	6.38762e-07	2.31259e-05
CG9411	1633.42	6.88803	1.38496	4.97346	6.57673e-07	2.37392e-05
GstE12	3165.41	3.57314	0.718583	4.97249	6.6099e-07	2.37878e-05
Obp99d	174.503	23.7358	4.78512	4.96033	7.03727e-07	2.52504e-05
CG31955	262.724	4.39258	0.885693	4.95949	7.06798e-07	2.52853e-05
Sip1	2812.05	6.90173	1.39289	4.95499	7.2335e-07	2.58009e-05
CG15784	24832.5	-3.67048	0.741504	-4.95005	7.41947e-07	2.63862e-05
CG2816	109.632	10.4004	2.10198	4.94789	7.50229e-07	2.66023e-05
CG31704	178.738	11.1065	2.24495	4.9473	7.52494e-07	2.66043e-05
CG11069	336.607	9.53146	1.92867	4.942	7.73252e-07	2.72583e-05
Mur29B	2456.73	6.66507	1.34923	4.93989	7.81685e-07	2.73953e-05
lok	268.812	4.12548	0.835122	4.93997	7.81326e-07	2.73953e-05
DAT	48293.9	3.11086	0.630985	4.93016	8.21628e-07	2.87117e-05
CG10252	294.178	-3.27227	0.666368	-4.91061	9.07937e-07	3.16361e-05
CG5326	995.885	7.58839	1.54665	4.90633	9.27951e-07	3.22403e-05
blow	997.02	-2.56552	0.523876	-4.89719	9.72164e-07	3.36793e-05
Sfp53D	113.32	-5.37462	1.09765	-4.8965	9.756e-07	3.37015e-05
Cyp4e1	738.435	6.55221	1.33975	4.89063	1.00512e-06	3.4622e-05
CG3964	115.817	-4.01814	0.823489	-4.87941	1.06404e-06	3.65473e-05
CG15695	401.489	4.30664	0.883151	4.87646	1.08009e-06	3.6993e-05
Scr	232.56	6.92375	1.42028	4.87492	1.08854e-06	3.7177e-05
GATAe	170.309	5.48348	1.12586	4.87049	1.11322e-06	3.79124e-05
tyf	28252.9	-2.9313	0.601919	-4.86993	1.11639e-06	3.79132e-05
CG7267	9848.09	5.86349	1.20583	4.8626	1.15852e-06	3.92335e-05
debcl	2344.29	6.24888	1.2859	4.85956	1.17649e-06	3.97306e-05
CG6018	1612.42	-3.02581	0.622812	-4.8583	1.18397e-06	3.98712e-05
Def	186.992	11.1742	2.30123	4.85574	1.1994e-06	4.01667e-05
CG14963	204.205	-3.76423	0.775206	-4.85578	1.19913e-06	4.01667e-05
CG42565	1313.94	8.70356	1.79358	4.85262	1.21843e-06	4.06908e-05
CG18107	797.552	8.30169	1.71316	4.84585	1.26073e-06	4.19871e-05
CG34113	5243	2.371	0.489659	4.84215	1.28444e-06	4.26589e-05
CG32436	477.544	-4.05289	0.837271	-4.84059	1.29451e-06	4.28754e-05
Amy-p	1993.87	7.89142	1.63377	4.83018	1.36409e-06	4.5056e-05
NetB	12908.5	2.56993	0.53277	4.82371	1.40912e-06	4.64164e-05
lectin-30A	127.256	-3.8723	0.803318	-4.82038	1.43286e-06	4.70696e-05
CG31460	2909.51	-2.3077	0.479631	-4.81141	1.49867e-06	4.90979e-05
Fs	5077.15	-2.61387	0.543364	-4.81052	1.50538e-06	4.91839e-05
Tsp42En	2349.68	-3.3073	0.688046	-4.8068	1.53364e-06	4.99716e-05
CAH2	13195.4	6.91011	1.4379	4.80568	1.54225e-06	5.01168e-05
CG1136	565.592	7.4807	1.55918	4.79784	1.60387e-06	5.19793e-05
CG14401	3786.58	-3.6169	0.754371	-4.79459	1.63006e-06	5.26865e-05
CG30154	153.176	9.44915	1.97745	4.77845	1.76654e-06	5.6945e-05
CG13950	1831.28	-4.63584	0.971828	-4.77023	1.84017e-06	5.91603e-05
CG8012	90.5098	8.6915	1.82307	4.76751	1.86514e-06	5.98036e-05
how	898.002	4.77382	1.00235	4.76263	1.91082e-06	6.11058e-05
Msr-110	38891.3	4.92174	1.03398	4.75998	1.93616e-06	6.17522e-05
CG34340	1136.13	3.4802	0.73147	4.75782	1.95692e-06	6.22497e-05
Cyp6a19	84.0146	10.016	2.10598	4.75597	1.97499e-06	6.2659e-05
CG14523	300.547	3.75817	0.791114	4.75048	2.02936e-06	6.42153e-05
insc	532.602	6.40852	1.34974	4.74795	2.05487e-06	6.48522e-05
Pvf2	199.046	6.86733	1.4502	4.73545	2.18575e-06	6.88025e-05
spirit	908.798	4.84428	1.02334	4.7338	2.2035e-06	6.91806e-05
CG9498	236.328	10.0478	2.12306	4.73271	2.21537e-06	6.93727e-05
Ets98B	901.962	7.06902	1.49456	4.72982	2.24718e-06	7.01865e-05
CG30440	132.688	7.22244	1.52796	4.72686	2.2802e-06	7.08506e-05
axo	1563.21	2.58201	0.546203	4.7272	2.27636e-06	7.08506e-05
CG8563	1096.76	8.09296	1.71281	4.72496	2.30165e-06	7.13333e-05
Cda5	3656.17	2.19216	0.464142	4.72304	2.3235e-06	7.14595e-05
CG17324	157.349	10.9225	2.31217	4.72392	2.31346e-06	7.14595e-05
CR43492	328.142	-3.21136	0.679888	-4.72336	2.31979e-06	7.14595e-05
CG14132	526.78	6.60682	1.40043	4.71771	2.38509e-06	7.3167e-05
pgant8	162.187	7.56681	1.60506	4.71435	2.42479e-06	7.41961e-05
per	6134.01	-2.55724	0.543129	-4.70835	2.4973e-06	7.62215e-05
pain	723.01	5.7548	1.22626	4.69297	2.69266e-06	8.19764e-05
CG32698	2223.84	2.77393	0.591604	4.68884	2.74762e-06	8.34389e-05
SPE	1165.05	7.85105	1.67603	4.68431	2.809e-06	8.50887e-05
CG12582	909.969	4.86896	1.03976	4.68279	2.8299e-06	8.55069e-05
CG8641	3413.78	3.33992	0.714737	4.67293	2.96936e-06	8.94966e-05
TwdlD	478.576	-6.4008	1.37156	-4.66681	3.05913e-06	9.19723e-05
CG1552	3493.66	2.49052	0.534089	4.66312	3.11445e-06	9.34026e-05
dpr18	9129.44	2.45852	0.527687	4.65904	3.17685e-06	9.50374e-05
GstT4	5951.44	5.7074	1.22555	4.657	3.2085e-06	9.57466e-05
Rel	8724.66	3.02125	0.648865	4.6562	3.22096e-06	9.58812e-05
CG1698	1083.16	4.28481	0.920521	4.65476	3.24352e-06	9.63151e-05
for	2793.43	5.2242	1.1264	4.63795	3.51885e-06	0.000104234
Kal1	92.3068	4.63193	0.998834	4.63734	3.52919e-06	0.000104284
CG12814	8713.35	6.35677	1.37386	4.62695	3.71092e-06	0.000109386
scb	2209.2	6.09794	1.31826	4.62575	3.7324e-06	0.000109751
CG15093	259.572	5.71986	1.23732	4.62276	3.78664e-06	0.000111075
CG44008	348.251	7.09806	1.53775	4.61586	3.91462e-06	0.000114483
CG18507	1762.97	6.25908	1.35611	4.61548	3.92183e-06	0.000114483
CG15394	367.399	2.97216	0.646639	4.59633	4.30004e-06	0.000125175
Jheh1	1561.46	4.43968	0.966009	4.5959	4.30886e-06	0.000125175
Obp19c	183.63	8.12829	1.76908	4.59465	4.33469e-06	0.000125623
CG7054	572.503	4.93912	1.07553	4.59226	4.38462e-06	0.000126765
vvl	1661.44	2.9989	0.653696	4.58761	4.48348e-06	0.000129313
CG42272	178.623	5.74887	1.25378	4.58523	4.53488e-06	0.000130483
CG14427	73.7976	-5.34162	1.16597	-4.58128	4.62143e-06	0.000132657
CG3884	2824.07	8.04461	1.76048	4.56955	4.88783e-06	0.000139971
melt	389.24	5.72456	1.25408	4.56475	5.00099e-06	0.000142872
CG6201	6790.78	-2.0778	0.455531	-4.56127	5.08443e-06	0.000144912
mthl9	492.721	6.10466	1.34043	4.55424	5.2576e-06	0.000149494
CG10562	673.319	7.24812	1.5922	4.55228	5.30684e-06	0.000150539
Lim3	1762.03	2.89354	0.636134	4.54863	5.39972e-06	0.000152814
asparagine-synthetase	4282.57	-2.28846	0.503724	-4.54309	5.54358e-06	0.000156518
CG1648	30292.9	-3.07037	0.675934	-4.54241	5.56138e-06	0.000156654
CG33460	89.0808	10.1007	2.22526	4.53909	5.64983e-06	0.000158775
CR43989	151.538	9.43496	2.08011	4.53579	5.73883e-06	0.000160901
CG9733	1365.41	8.08148	1.78444	4.52887	5.9301e-06	0.000165878
tup	5790.3	4.05334	0.895778	4.52494	6.04131e-06	0.000168597
CR43152	191.365	3.68176	0.814318	4.52128	6.14671e-06	0.000171143
CG13284	1433.16	3.76074	0.832063	4.51978	6.19041e-06	0.000171962
VGlut	21192.4	3.45769	0.765124	4.51913	6.2095e-06	0.000172096
Adh	458.727	6.72998	1.4899	4.51708	6.26993e-06	0.000173372
CG3267	249.646	4.72506	1.04645	4.51534	6.3215e-06	0.000174398
CG15717	251.545	3.27148	0.724998	4.51241	6.40961e-06	0.000176425
CG31523	97254.5	6.27263	1.39057	4.51085	6.45693e-06	0.000177323
klu	382.992	3.56909	0.792166	4.50548	6.62227e-06	0.000181422
Obp83g	668.61	8.17257	1.8141	4.50503	6.63629e-06	0.000181422
Spn42Da	7649.23	-2.0836	0.462635	-4.50376	6.67612e-06	0.000182098
Cyp9b2	2203.95	8.11105	1.80161	4.5021	6.72843e-06	0.00018311
Hey	753.85	-3.48387	0.774662	-4.49728	6.88289e-06	0.000186892
CG16820	1008.56	8.42084	1.87595	4.48885	7.16093e-06	0.000194005
bab1	1293.41	2.34928	0.5237	4.48592	7.26003e-06	0.000196249
CG1208	334.418	2.58615	0.576694	4.48444	7.3106e-06	0.000197174
CG5157	90.004	5.51802	1.23291	4.47561	7.61942e-06	0.000205044
Esyt2	2395.68	2.33306	0.52207	4.46887	7.86324e-06	0.000211134
CG1544	52.0547	6.2665	1.40299	4.46653	7.9498e-06	0.000212042
dx	219.511	4.563	1.02155	4.46672	7.94272e-06	0.000212042
hec	2973.86	-2.61234	0.584835	-4.4668	7.94001e-06	0.000212042
CG30159	926.403	5.15555	1.15506	4.46345	8.06518e-06	0.000214644
Ac78C	7738.13	-2.59621	0.582176	-4.45949	8.21544e-06	0.000218162
CG2556	1576.6	5.1123	1.14679	4.45794	8.27512e-06	0.000219263
Tep3	594.839	5.30686	1.19058	4.45736	8.29751e-06	0.000219374
bowl	1509.91	5.19917	1.16667	4.45642	8.33414e-06	0.000219633
mst	623.158	-2.39808	0.538149	-4.45617	8.34374e-06	0.000219633
CG11852	132.95	6.47187	1.45283	4.45466	8.40273e-06	0.000220704
CG32532	1243.14	3.02655	0.679603	4.4534	8.45193e-06	0.000221514
CG17018	1199.2	-4.2097	0.945618	-4.4518	8.51549e-06	0.000222696
Vmat	127917	4.33112	0.973055	4.45106	8.54481e-06	0.000222979
CR43497	8026.79	2.35314	0.528748	4.45041	8.57076e-06	0.000223173
CG11899	2339.15	5.3524	1.20305	4.44903	8.62581e-06	0.000224122
Mlp84B	384.498	3.67134	0.825689	4.4464	8.73218e-06	0.000225912
Ugt35b	3148.73	2.43576	0.547756	4.4468	8.71583e-06	0.000225912
CG5630	3248.79	4.94137	1.11321	4.43886	9.04363e-06	0.000233469
alpha-Est3	404.342	3.69445	0.832401	4.43831	9.06684e-06	0.000233568
CG30269	1016.83	5.44488	1.22713	4.4371	9.11803e-06	0.000234386
obst-A	1635.8	7.63721	1.72338	4.43154	9.35616e-06	0.000239995
CG13033	88.2812	-5.85721	1.32355	-4.42536	9.62801e-06	0.000246444
CG17664	46.2402	9.15557	2.07026	4.42243	9.75957e-06	0.000249283
Sr-CI	2039.66	3.16074	0.715474	4.41768	9.97647e-06	0.000254284
Phk-3	78046.3	14.8102	3.35508	4.41427	1.0135e-05	0.000257416
CG1504	3643.37	-3.32887	0.75414	-4.41412	1.01421e-05	0.000257416
mwh	182.739	5.18849	1.17585	4.41254	1.02163e-05	0.000258757
CG9691	3330.9	5.51637	1.25062	4.41092	1.02935e-05	0.000260163
CG10300	79.9237	7.52987	1.70771	4.40933	1.03693e-05	0.000261532
CR43928	611.723	-4.91831	1.11561	-4.40863	1.04029e-05	0.000261831
ced-6	4593.17	3.89391	0.884221	4.40377	1.06387e-05	0.000266739
CG7724	1955.79	5.86263	1.3313	4.4037	1.06421e-05	0.000266739
CG14356	315.283	6.34862	1.44297	4.39969	1.08406e-05	0.000271149
CG11835	572.439	-2.33319	0.530637	-4.39696	1.09778e-05	0.000274014
l(2)gl	2243.52	6.03756	1.37385	4.39463	1.10961e-05	0.000276393
Spn42Dd	329.197	3.94075	0.897295	4.39181	1.12413e-05	0.000279434
pot	1309.67	8.08283	1.8409	4.3907	1.12986e-05	0.000280279
OS9	78.7794	6.51417	1.48424	4.38888	1.13936e-05	0.000282056
Oxp	53.8513	9.37391	2.13693	4.38663	1.15122e-05	0.000284408
CG43313	797.163	4.54332	1.03702	4.38112	1.18072e-05	0.000291099
CG4928	778.798	6.55346	1.49745	4.3764	1.20653e-05	0.000296857
mub	43604.8	2.32669	0.531711	4.37586	1.20955e-05	0.000296993
trh	492.779	3.30777	0.75617	4.37437	1.21785e-05	0.000298422
CG33679	127.041	10.6137	2.42951	4.36867	1.25007e-05	0.000305696
CG12592	141.611	-3.66219	0.839433	-4.36269	1.2847e-05	0.00031353
beat-Ia	14540.3	-2.36763	0.543701	-4.35465	1.3328e-05	0.000322713
CG13731	99.7257	10.2639	2.35633	4.35589	1.32527e-05	0.000322713
CG4576	4414.91	7.0567	1.62026	4.3553	1.32886e-05	0.000322713
CG3669	54.3441	-7.73008	1.77515	-4.35461	1.33304e-05	0.000322713
obst-E	4907.98	6.7225	1.54627	4.34756	1.37658e-05	0.000332585
CG14695	527.656	-2.47684	0.570062	-4.34485	1.39368e-05	0.000336045
CG7179	397.61	7.40508	1.70693	4.33825	1.43622e-05	0.000345609
Coop	234.793	3.09603	0.713911	4.33672	1.44624e-05	0.00034718
CG8916	2489.72	2.13254	0.491779	4.33638	1.4485e-05	0.00034718
chrb	147006	-2.71832	0.627564	-4.33154	1.48068e-05	0.000354188
rost	1735.52	5.94666	1.3742	4.32736	1.50907e-05	0.000360265
CG44153	18113.7	-2.67022	0.61769	-4.32291	1.53983e-05	0.000366532
CG43202	160.981	7.97277	1.8444	4.32269	1.5414e-05	0.000366532
CG15617	169.723	-5.7959	1.34234	-4.31777	1.57612e-05	0.000374049
RhoGAP15B	459.579	3.69198	0.85618	4.31216	1.61671e-05	0.000382928
CG7778	5389.42	5.62043	1.30364	4.31135	1.62262e-05	0.000383575
Ets21C	534.414	3.54408	0.823949	4.30133	1.69774e-05	0.000400547
CG13101	847.049	6.00335	1.39609	4.30012	1.70708e-05	0.000401964
Cys	183.639	7.75185	1.80305	4.2993	1.71337e-05	0.000402658
CG14892	461.162	7.92362	1.84489	4.2949	1.74769e-05	0.000409925
CG11319	4193.76	2.80902	0.654901	4.28922	1.79301e-05	0.000419435
Aldh	6310.98	2.32251	0.54151	4.28895	1.79519e-05	0.000419435
ham	541.168	3.70692	0.864604	4.28742	1.80759e-05	0.000421515
CG5210	4696.26	7.13347	1.664	4.28695	1.81142e-05	0.000421593
E23	1325.63	6.21803	1.45076	4.28604	1.81884e-05	0.000422504
CG9302	4529.64	-2.04682	0.477799	-4.28384	1.83692e-05	0.000424324
ninaE	19615.7	3.44176	0.803434	4.28381	1.83724e-05	0.000424324
CG6398	945.691	7.88701	1.841	4.28408	1.83495e-05	0.000424324
CG10176	992.906	7.88355	1.84284	4.27794	1.88628e-05	0.000433989
QC	1205.34	6.2399	1.45858	4.27807	1.88522e-05	0.000433989
Ugt36Bc	1117.05	7.37426	1.72431	4.27664	1.89739e-05	0.000435712
CG15661	1203.72	4.63621	1.0843	4.27579	1.90465e-05	0.000436449
LanA	1005.78	3.09398	0.723668	4.27541	1.90784e-05	0.000436449
CG16826	4673.65	5.98563	1.40268	4.26727	1.97882e-05	0.000450977
Cyp12a4	634.172	2.84053	0.665638	4.26737	1.97789e-05	0.000450977
CG42807	3146.77	3.02797	0.709863	4.26557	1.99396e-05	0.000452582
CG5897	399.831	5.5182	1.29377	4.26521	1.99713e-05	0.000452582
CG13360	121.033	6.82169	1.59921	4.26566	1.99308e-05	0.000452582
CG7720	1832.85	4.75824	1.11578	4.26448	2.00365e-05	0.000453209
uif	747.188	6.40535	1.50232	4.26364	2.01122e-05	0.000454069
GstS1	18276.7	4.45566	1.04552	4.26167	2.02905e-05	0.000457237
CG8492	107.879	6.54282	1.53639	4.25857	2.05737e-05	0.000462755
Gfat1	7305.88	6.22665	1.46409	4.25292	2.11e-05	0.000473708
CG32406	39710.1	-2.69794	0.634457	-4.25235	2.11537e-05	0.000474031
CG33993	2005.39	-2.11814	0.498564	-4.24849	2.15221e-05	0.000481392
Eip63F-1	42480.8	-2.60846	0.614339	-4.24597	2.17652e-05	0.000485927
CG17189	198.508	6.86624	1.61792	4.24386	2.19705e-05	0.000489606
CG15153	198.194	6.27637	1.4804	4.23964	2.23883e-05	0.000497201
CG9766	740.052	2.50303	0.590395	4.23958	2.23938e-05	0.000497201
vas	130.396	-3.3252	0.784603	-4.23807	2.2545e-05	0.000499638
CG42329	1377.11	8.28735	1.9567	4.23537	2.28179e-05	0.000504758
CG14125	1005.78	7.07385	1.67041	4.2348	2.28758e-05	0.000504798
CG43222	11139.9	-2.30222	0.543677	-4.23453	2.29035e-05	0.000504798
CG15082	4818.93	5.17414	1.22241	4.23274	2.3086e-05	0.000507891
CG5171	580.375	5.40836	1.2786	4.2299	2.33793e-05	0.000512475
CG14572	110.166	6.19824	1.46528	4.23007	2.33616e-05	0.000512475
dve	2627.79	3.43736	0.813497	4.22542	2.385e-05	0.000521843
rtet	1421.18	-2.17739	0.515471	-4.22408	2.39915e-05	0.000523989
CG10211	922.305	7.56769	1.7926	4.22163	2.42539e-05	0.000527807
CG5849	183.057	7.16376	1.69678	4.22198	2.42171e-05	0.000527807
CR44024	4543.56	1.96386	0.466017	4.21413	2.50743e-05	0.000544676
CG3770	1205.65	5.2412	1.24423	4.21242	2.52653e-05	0.000547839
CG5973	10839.8	4.66383	1.10833	4.20797	2.57676e-05	0.000557728
CG4962	76.8905	9.88825	2.35088	4.20619	2.59717e-05	0.000561138
CG10175	2793.58	6.80457	1.61809	4.20532	2.60716e-05	0.000562289
CG12493	620.956	7.71807	1.83601	4.20373	2.62557e-05	0.00056424
CG6847	625.492	4.91003	1.16798	4.20385	2.62415e-05	0.00056424
Prx2540-2	955.525	7.05469	1.67871	4.20244	2.64053e-05	0.000566444
CG11458	615.594	8.46042	2.01533	4.19803	2.69248e-05	0.000576564
Cct5	11159.1	-1.90949	0.454943	-4.19721	2.70221e-05	0.000577621
bbg	5896.74	6.11152	1.4572	4.19401	2.74062e-05	0.000584796
ImpL3	5041.12	-3.80717	0.907963	-4.1931	2.75174e-05	0.000586129
CG14518	64.4448	9.63305	2.29771	4.19246	2.75949e-05	0.000586744
PGRP-LC	1397.65	4.24979	1.01379	4.19199	2.76514e-05	0.000586911
CG17107	119.326	7.53715	1.79834	4.19117	2.77516e-05	0.000588003
Cyp311a1	263.674	6.36998	1.52003	4.1907	2.78097e-05	0.0005882
CG17549	5030.22	6.24751	1.49132	4.18924	2.79889e-05	0.000590952
ttk	1641.52	4.86436	1.16128	4.18879	2.80446e-05	0.000591094
CG42822	108.522	6.66255	1.59097	4.18772	2.81772e-05	0.000592852
CG8399	2437.55	4.64908	1.11138	4.18316	2.87481e-05	0.000600557
GstE5	265.724	6.83138	1.6332	4.18281	2.87924e-05	0.000600557
Osi9	327.202	8.47205	2.02502	4.18369	2.8681e-05	0.000600557
bocksbeutel	3599.2	-2.33061	0.557053	-4.18382	2.86649e-05	0.000600557
CG6954	4294.02	3.14622	0.752068	4.18343	2.87148e-05	0.000600557
CG9238	4027.35	7.29187	1.74434	4.1803	2.91119e-05	0.000606171
CG13012	168.167	4.40248	1.05467	4.17425	2.98963e-05	0.00062143
if	3404.12	6.05318	1.4505	4.17316	3.00405e-05	0.000623352
kst	2798.42	5.34184	1.28022	4.17258	3.01166e-05	0.000623858
CG13510	2714.43	15.0324	3.60688	4.1677	3.07695e-05	0.00063629
CG18577	51.4139	7.84774	1.88444	4.1645	3.12035e-05	0.000643576
CR34044	124.283	4.15483	0.997722	4.16432	3.12286e-05	0.000643576
Cht7	874.274	6.338	1.52375	4.15947	3.18981e-05	0.000656253
Vdup1	4529.53	6.69252	1.60922	4.15885	3.19849e-05	0.000656917
CG2269	367912	-2.6353	0.634099	-4.15598	3.23891e-05	0.000664088
wbl	187.123	4.31814	1.03973	4.15315	3.27926e-05	0.000671218
CG1678	5562.75	6.99882	1.68556	4.15223	3.2925e-05	0.000672786
PGRP-SA	370.918	4.78376	1.15278	4.14977	3.32815e-05	0.00067892
CG8369	6061.65	1.97834	0.476862	4.14866	3.34432e-05	0.000680537
CG15537	8158.95	2.76914	0.667513	4.14845	3.34736e-05	0.000680537
Proc-R	821.856	3.24737	0.782963	4.14754	3.36073e-05	0.000682105
CG33056	5877.49	-2.04002	0.491981	-4.14653	3.37548e-05	0.000682799
CR44106	113.144	8.98152	2.16598	4.14662	3.37414e-05	0.000682799
Prx2540-1	812.708	7.44816	1.79687	4.14509	3.39685e-05	0.000684824
Cyp317a1	54.0137	9.37798	2.26225	4.14542	3.39188e-05	0.000684824
GNBP1	280.105	3.56664	0.861641	4.13935	3.48291e-05	0.000699832
CG15550	38.3916	8.89013	2.14762	4.13952	3.48037e-05	0.000699832
Tsp42Ec	853.498	7.89935	1.91211	4.13122	3.6084e-05	0.00072384
CG12947	1873.53	-3.82078	0.925121	-4.13003	3.62714e-05	0.000726391
CG3326	147.896	5.4803	1.32927	4.1228	3.74294e-05	0.0007475
caup	1404.71	5.61447	1.36185	4.12268	3.74494e-05	0.0007475
Rh4	1041.04	6.42739	1.56017	4.11967	3.79418e-05	0.000756076
Gs2	40471.7	3.82752	0.929488	4.11788	3.82368e-05	0.000760697
Obp56a	243.664	3.0834	0.749524	4.11382	3.89169e-05	0.000772634
ttm2	202.365	-3.52648	0.857288	-4.11353	3.8965e-05	0.000772634
CG5958	581.996	4.23128	1.02914	4.11146	3.93159e-05	0.000778312
CG5346	1553.83	4.17617	1.01636	4.10894	3.9748e-05	0.000785578
CG31908	6640.54	-2.09688	0.510582	-4.10684	4.01115e-05	0.000791463
proPO-A1	5671.74	7.49915	1.82795	4.10248	4.08745e-05	0.0008052
CG7840	1422.21	-2.30483	0.561978	-4.10127	4.10881e-05	0.000805736
spri	1925.88	2.96037	0.721731	4.10177	4.10007e-05	0.000805736
sev	644.387	3.69205	0.900237	4.1012	4.11022e-05	0.000805736
Pvf1	1068.73	5.0801	1.23948	4.09856	4.15736e-05	0.000813654
bt	534.121	3.21258	0.784346	4.09586	4.20596e-05	0.000821832
CG1124	43015.7	13.2596	3.23816	4.09479	4.2256e-05	0.000824334
CG6481	136.258	-3.09321	0.755869	-4.09225	4.27202e-05	0.000832044
mew	1757.03	2.57911	0.630425	4.09107	4.29385e-05	0.000834945
CG31262	140.187	6.55164	1.60248	4.08843	4.34306e-05	0.000843154
CG9400	1409.79	7.01521	1.71796	4.08345	4.43722e-05	0.00086005
Hdc	417.095	4.83161	1.1842	4.08006	4.50241e-05	0.000865481
Phm	79270	-1.92807	0.472594	-4.07976	4.50831e-05	0.000865481
CG13457	88.0876	-4.98111	1.22074	-4.0804	4.49586e-05	0.000865481
MAGE	1054.96	-2.33848	0.573108	-4.08034	4.49698e-05	0.000865481
pnt	2533.55	6.00737	1.47224	4.08043	4.49523e-05	0.000865481
CG6361	655.634	6.54919	1.60489	4.08078	4.48855e-05	0.000865481
dac	2727.35	3.37068	0.826277	4.07936	4.51598e-05	0.000865575
del	4558.84	-2.28536	0.56055	-4.077	4.56211e-05	0.000873029
CG14275	857.442	7.53318	1.84832	4.0757	4.58768e-05	0.000876531
pk	710.012	5.03686	1.23733	4.07074	4.68637e-05	0.00089397
Mal-A5	612.701	2.82678	0.694552	4.06994	4.70258e-05	0.000895646
mth	406.713	3.22038	0.791537	4.06852	4.73124e-05	0.000899682
CG34115	480.439	6.90743	1.69864	4.06645	4.77351e-05	0.00090629
CG6071	312.626	-2.81369	0.692013	-4.06595	4.78382e-05	0.000906819
Cpr49Ac	90.0526	10.1168	2.4885	4.06542	4.79463e-05	0.000907442
CG9815	1090.29	7.28993	1.7938	4.06397	4.82458e-05	0.00091168
CG14516	886.343	3.01684	0.74404	4.05467	5.02061e-05	0.000947238
CG14830	242.424	7.57454	1.8685	4.05381	5.03901e-05	0.000947743
CG5391	40.2284	-8.63856	2.13086	-4.05404	5.03415e-05	0.000947743
CG15506	169.354	6.63516	1.63914	4.04796	5.16658e-05	0.000970222
TwdlK	47.065	-8.86456	2.19053	-4.04676	5.19309e-05	0.000973685
CG17026	725.823	2.19801	0.543254	4.04601	5.2098e-05	0.000975301
CG15343	350.189	-3.87397	0.957877	-4.04433	5.24726e-05	0.00098079
MFS3	18734.9	-3.62151	0.895651	-4.04344	5.26733e-05	0.000983017
CG15269	86.9913	-6.72169	1.66252	-4.04307	5.27563e-05	0.000983045
Cpr67B	4278.16	7.46653	1.84703	4.04245	5.28946e-05	0.000984101
Gr89a	217.407	7.67881	1.90003	4.04142	5.31288e-05	0.000986935
pwn	730.493	5.48993	1.35855	4.04103	5.32179e-05	0.00098707
CG9314	378.611	8.00079	1.98038	4.04003	5.34445e-05	0.000988231
CG13285	27339.3	13.1899	3.26473	4.04013	5.34223e-05	0.000988231
CG11407	2587.21	3.51914	0.871984	4.03578	5.44203e-05	0.0010032
moody	4575.83	5.37362	1.33139	4.03608	5.43513e-05	0.0010032
CG6912	301.422	-3.77023	0.934383	-4.035	5.46033e-05	0.00100503
Sk1	944.116	4.03516	1.00037	4.03366	5.49145e-05	0.00100922
CG4666	3407.21	5.91356	1.46712	4.03074	5.5602e-05	0.0010203
CG42696	45.1591	-8.80493	2.18601	-4.02785	5.62885e-05	0.00103133
Acp53C14b	168.967	-3.12855	0.777351	-4.02463	5.70646e-05	0.00104396
CG12581	2272.12	7.39825	1.84168	4.01712	5.89147e-05	0.00107617
svr	181228	-2.21878	0.552909	-4.01291	5.9974e-05	0.00109387
CG43103	276.359	4.72603	1.17844	4.01039	6.06179e-05	0.00110394
Cyp18a1	133.976	4.8456	1.20909	4.00764	6.13279e-05	0.00111519
CG13739	15419.2	-1.81142	0.45212	-4.00651	6.16213e-05	0.00111883
Spn77Ba	875.417	4.5777	1.14442	4.00002	6.33381e-05	0.00114828
CG31676	1784.69	2.76022	0.690911	3.99504	6.46836e-05	0.00116916
CG15213	198.755	8.24525	2.06387	3.99504	6.4684e-05	0.00116916
CG10513	1366.25	3.38438	0.847539	3.99319	6.51908e-05	0.00117656
CG10477	51.4645	-6.31319	1.58138	-3.9922	6.54629e-05	0.0011797
CG15068	697.015	6.27387	1.57195	3.99113	6.57592e-05	0.00118228
CG3842	2086.03	4.97073	1.24549	3.99098	6.5802e-05	0.00118228
CG9090	1297.75	6.36158	1.5969	3.98372	6.78455e-05	0.00121537
CG31371	44.1234	7.62755	1.91466	3.98376	6.78348e-05	0.00121537
Spn47C	863.217	6.16517	1.54775	3.98331	6.79627e-05	0.00121567
Tsp66E	8534	2.42475	0.608827	3.98265	6.81514e-05	0.00121723
CG1461	2561.45	4.70031	1.18053	3.98154	6.84707e-05	0.00122113
Cpr51A	934.72	4.88853	1.22879	3.97833	6.94e-05	0.00123452
ec	616.377	3.47884	0.874466	3.97824	6.94261e-05	0.00123452
foxo	1103.88	4.01568	1.00991	3.97627	7.00036e-05	0.00124295
GstE7	694.327	4.82515	1.21426	3.97373	7.07557e-05	0.00125446
gcm	54.3385	6.38834	1.60812	3.97255	7.11064e-05	0.00125698
Faa	754.734	6.09859	1.53511	3.97274	7.10512e-05	0.00125698
Hus1-like	609.392	-2.3492	0.591529	-3.9714	7.14511e-05	0.0012595
Gld2	405.094	2.32845	0.586308	3.97138	7.14582e-05	0.0012595
CG30026	1213.38	4.63244	1.16831	3.96506	7.33767e-05	0.00128955
cu	9527.52	2.84368	0.717122	3.96541	7.32699e-05	0.00128955
CG33127	65.6048	-5.18488	1.3081	-3.96367	7.38074e-05	0.00129512
ebd2	2673.57	-2.99258	0.755065	-3.96334	7.39089e-05	0.00129512
Wnt2	88.0519	10.0844	2.5495	3.95546	7.63879e-05	0.00133275
CG14153	523.161	4.28957	1.0843	3.95608	7.61883e-05	0.00133275
nct	6504.94	-1.92337	0.486244	-3.95556	7.63561e-05	0.00133275
CG15065	21044.2	13.0344	3.29996	3.94987	7.81931e-05	0.00136228
Oatp33Eb	809.362	4.33121	1.09671	3.94929	7.83839e-05	0.00136363
pxb	1727.67	2.34211	0.593567	3.94583	7.95239e-05	0.00138147
Spn42Dc	149.7	4.5624	1.15677	3.94408	8.01074e-05	0.0013896
CG10738	4019.22	-2.1859	0.555135	-3.9376	8.23017e-05	0.00142562
CG11320	508.811	-3.17008	0.805864	-3.93376	8.36266e-05	0.00144649
CG43134	23980	7.29174	1.85515	3.93054	8.47565e-05	0.00146393
lft	740.175	6.97	1.77395	3.92909	8.52692e-05	0.00147068
CG9628	2795.28	4.0198	1.0232	3.92865	8.54229e-05	0.00147123
CG15719	186.32	2.87365	0.731712	3.9273	8.59046e-05	0.00147621
CG13008	234.114	3.45879	0.880738	3.92715	8.59569e-05	0.00147621
CG1806	347.858	6.68195	1.70183	3.92633	8.62527e-05	0.00147918
CG9377	1577.24	2.87943	0.733633	3.92489	8.6769e-05	0.00148592
ck	811.249	5.00701	1.27636	3.9229	8.74899e-05	0.00149402
crb	4595.75	4.22596	1.07724	3.92297	8.74648e-05	0.00149402
CG34215	689.769	4.54571	1.15945	3.92057	8.8338e-05	0.00150424
CG4753	274.958	3.60743	0.920083	3.92077	8.82669e-05	0.00150424
dmrt99B	347.536	3.38835	0.864331	3.9202	8.84747e-05	0.00150444
CG6465	1442	3.50474	0.894766	3.91693	8.96829e-05	0.0015207
Gp93	17098.5	-1.95803	0.499847	-3.91725	8.95638e-05	0.0015207
CG1299	1643.06	6.82039	1.74242	3.91431	9.06618e-05	0.00153514
Sp7	638.465	5.34091	1.36491	3.91301	9.11539e-05	0.00153915
be	1766.9	4.62492	1.18191	3.91309	9.11225e-05	0.00153915
CHKov1	1227.8	4.65349	1.19076	3.90799	9.30681e-05	0.00156927
Hexo1	8241.38	3.02721	0.775034	3.9059	9.38741e-05	0.0015773
CG14154	40.8931	8.97624	2.29822	3.90574	9.39369e-05	0.0015773
Whamy	274.917	5.51356	1.41153	3.90609	9.38028e-05	0.0015773
lectin-37Db	505.395	6.90282	1.76937	3.90129	9.5682e-05	0.00160437
CG4221	85.2263	7.04814	1.80781	3.89873	9.67003e-05	0.00161919
CG17834	1212.95	6.13142	1.57295	3.89804	9.69745e-05	0.00162051
Ser	1316.49	7.75589	1.98979	3.89784	9.7056e-05	0.00162051
phm	173.543	8.01386	2.05614	3.89752	9.71824e-05	0.00162051
Dhc93AB	249.047	-2.94368	0.755415	-3.89677	9.74854e-05	0.00162332
CG31370	209.717	3.79255	0.97351	3.89575	9.78967e-05	0.00162792
l(2)01289	379.075	-2.36656	0.608276	-3.89061	9.99934e-05	0.0016605
CG6034	60.2564	6.12548	1.57498	3.88924	0.000100561	0.00166762
TfIIA-S	12226.7	-2.08547	0.537066	-3.88309	0.000103139	0.00170803
rdhB	436.68	4.06852	1.04802	3.88211	0.000103555	0.00171256
Ca-alpha1T	37046.9	2.08001	0.536049	3.88026	0.000104346	0.00172328
CG5895	2022.87	1.94476	0.501349	3.87905	0.000104865	0.00172949
CG31028	238.393	6.96518	1.79598	3.8782	0.000105231	0.00173315
CG6675	122.995	6.58475	1.69807	3.87779	0.00010541	0.00173372
CG5254	844.245	3.34898	0.863763	3.87719	0.000105668	0.00173561
kek1	10209.7	2.62164	0.676915	3.87293	0.000107534	0.00176325
CG18748	161.923	6.57056	1.69664	3.87268	0.000107644	0.00176325
Lac	4185.44	4.26705	1.10224	3.87126	0.000108274	0.00177117
Tsp2A	632.537	4.22056	1.09034	3.87088	0.000108442	0.00177151
CG12896	507.107	5.90209	1.52504	3.87011	0.000108785	0.00177472
CG17278	982.541	2.45381	0.634197	3.86916	0.000109212	0.00177927
CG3940	2899.98	2.46779	0.638064	3.86763	0.000109899	0.00178805
AttD	40.7055	5.93103	1.5347	3.86462	0.00011126	0.00180776
CG33914	534.433	3.26824	0.846475	3.861	0.000112922	0.00183228
CG33965	38.176	8.8771	2.29967	3.86017	0.000113308	0.00183608
Phae1	168.399	4.26776	1.10691	3.85557	0.000115461	0.00186595
CG14879	1250.7	-2.42387	0.62865	-3.85566	0.000115416	0.00186595
Ppn	18780	5.3905	1.39836	3.85486	0.000115796	0.00186885
CG11368	393.251	3.67395	0.953606	3.8527	0.000116824	0.00188293
Tsp42Ea	714.876	4.91185	1.27516	3.85194	0.000117185	0.00188622
NijC	661.669	4.70546	1.22228	3.84975	0.000118238	0.00190064
CG31937	820.389	3.406	0.884858	3.84921	0.000118501	0.00190233
Aph-4	607.556	2.22318	0.577715	3.84823	0.000118975	0.00190739
conv	182.753	6.94116	1.80447	3.84664	0.000119748	0.00191724
Galpha73B	334.162	2.77449	0.721368	3.84615	0.00011999	0.00191857
CG18673	40.7261	-8.65584	2.25178	-3.844	0.000121045	0.00193287
Gef64C	876.768	5.58472	1.45382	3.84141	0.000122328	0.0019482
CG7966	792.144	3.94421	1.02675	3.84144	0.000122315	0.0019482
CG43340	1624.59	3.25292	0.847852	3.83666	0.000124717	0.00198102
Chd64	13243.3	3.26543	0.851061	3.83689	0.000124603	0.00198102
CG31769	1381.37	6.41589	1.67401	3.83266	0.000126767	0.00201092
CG3557	35.5381	8.77405	2.28949	3.83232	0.000126943	0.00201107
glob1	2663.66	1.94723	0.508199	3.83162	0.0001273	0.00201409
CG8586	820.174	6.56526	1.71444	3.8294	0.000128457	0.00202973
Ggt-1	1729.44	3.87768	1.0132	3.82716	0.000129632	0.00204561
wupA	777.41	5.46443	1.42936	3.82301	0.000131835	0.00207765
CG13658	89.4336	4.45641	1.16591	3.82225	0.000132237	0.00208127
Sgs5	10715.5	14.6375	3.83372	3.81809	0.000134491	0.00211398
CG31300	896.473	3.73172	0.977653	3.81702	0.000135073	0.00211917
ogre	4377.93	3.87916	1.01633	3.81684	0.000135173	0.00211917
CG17111	1500.02	3.98763	1.04504	3.81578	0.000135754	0.00212552
CG6753	82.9444	6.01019	1.57642	3.81256	0.000137533	0.00215058
CG13511	1253.75	13.918	3.65115	3.81194	0.000137881	0.00215322
CG9336	4101.39	4.74094	1.24532	3.807	0.000140665	0.00219386
CG34347	11044.5	-2.17526	0.571574	-3.80574	0.000141379	0.00220216
CG30460	691.313	4.40861	1.15898	3.80386	0.000142458	0.00220755
CG13871	47.4594	-5.58332	1.46756	-3.80448	0.0001421	0.00220755
CG13565	240062	5.83314	1.53342	3.804	0.000142377	0.00220755
zormin	1453.88	4.86007	1.27751	3.80434	0.000142185	0.00220755
ppk	43.3902	9.06914	2.38546	3.80183	0.000143629	0.00222284
GstE1	1112.91	3.67969	0.969008	3.79738	0.000146233	0.00226023
CG10163	47.6828	-7.55073	1.98869	-3.79684	0.000146552	0.00226227
CG10353	12889.4	1.93875	0.510682	3.7964	0.000146815	0.00226343
CG4594	170.831	4.16486	1.0974	3.7952	0.000147523	0.00227145
Acp53Ea	96.2458	-3.54408	0.934215	-3.79364	0.000148454	0.00227994
Amy-d	1082.38	6.54243	1.72445	3.79392	0.000148289	0.00227994
CG34367	766.496	2.27406	0.600093	3.78952	0.000150937	0.00231514
CG6509	4131.22	-1.88868	0.498741	-3.78689	0.000152542	0.00233678
CR43356	124.508	7.15958	1.89227	3.7836	0.000154577	0.00236495
Jheh2	5056.7	4.38194	1.15831	3.78303	0.00015493	0.00236735
CG14315	43.4268	-6.62207	1.75077	-3.78237	0.00015534	0.00237061
CG43324	16884.7	-2.63378	0.696584	-3.78099	0.000156209	0.00238085
CG31548	372.077	4.08359	1.08039	3.77973	0.000157	0.00238988
Tsp42Eg	948.846	4.29676	1.13753	3.77726	0.000158564	0.00240555
CG14495	51.0215	9.29581	2.46126	3.77685	0.000158827	0.00240555
Pk1r	425.938	7.27874	1.92714	3.77696	0.000158755	0.00240555
CG5987	1207.25	-1.96082	0.519165	-3.77688	0.000158806	0.00240555
CG14400	57.1263	-3.95157	1.04745	-3.77257	0.000161575	0.0024441
alpha-Est5	564.586	2.56532	0.680349	3.7706	0.000162855	0.00246038
CG15210	574.503	4.23709	1.1239	3.76997	0.000163266	0.00246349
Rep	3455.59	-2.07153	0.549544	-3.76953	0.000163553	0.00246475
ab	3239.91	2.41102	0.639841	3.76815	0.000164459	0.00247531
CG7296	419.116	6.03944	1.60298	3.76763	0.000164803	0.00247739
CG8066	2243.72	3.03562	0.806344	3.76467	0.000166767	0.00250379
CG3301	634.718	4.1374	1.09941	3.76328	0.0001677	0.00251466
mthl4	98.6417	5.7929	1.54132	3.75839	0.000171008	0.00256102
CG31248	2965.4	2.41822	0.643471	3.75809	0.000171216	0.00256102
Idgf3	4689.68	4.08474	1.0872	3.75711	0.000171884	0.00256782
Bx	36095.3	-2.32562	0.619171	-3.75602	0.000172638	0.00257589
CR43481	209.967	-2.66415	0.709643	-3.75421	0.000173887	0.00259132
PGRP-LA	1383.75	3.81191	1.01558	3.75341	0.000174444	0.00259641
CG15365	643.995	5.05497	1.34714	3.75239	0.000175158	0.00260383
CG5107	191.756	4.35562	1.16195	3.74853	0.000177871	0.0026409
yin	1802.51	4.72836	1.26194	3.74691	0.000179028	0.00265482
CG9737	795.539	7.23974	1.9335	3.74436	0.000180854	0.00267859
Inx2	5642.9	3.59659	0.961275	3.74148	0.000182938	0.00270613
CG18746	465.995	6.79165	1.81574	3.74044	0.000183701	0.00271409
mthl3	68.0766	6.72059	1.79758	3.73868	0.000184987	0.00272975
Dro	557.515	6.44711	1.72528	3.73686	0.000186336	0.00274629
CG15828	1402.96	2.33457	0.624802	3.73649	0.000186606	0.00274691
CG31191	15848.7	-1.75226	0.469758	-3.73013	0.000191383	0.00281379
CG6800	533.186	-2.24736	0.602744	-3.72856	0.000192579	0.00282793
CG15673	2294.17	5.7716	1.54831	3.72767	0.00019326	0.00283448
CR43836	172.205	3.70254	0.993937	3.72513	0.000195215	0.00285968
CG3091	1898.3	3.51447	0.943611	3.72449	0.000195709	0.00286343
CG5177	126.175	3.43071	0.921855	3.72152	0.000198025	0.0028938
Mlc1	713.518	5.58392	1.50148	3.71895	0.000200056	0.00291994
dpp	425.057	4.23826	1.13993	3.718	0.000200808	0.00292384
Nep3	15168.3	-2.1128	0.568263	-3.71801	0.000200802	0.00292384
CG31706	4063.08	2.24992	0.60521	3.71758	0.000201142	0.00292518
yellow-b	621.216	5.73788	1.54376	3.71682	0.000201743	0.00293038
CG11353	596.59	6.48878	1.74762	3.71293	0.000204873	0.00297226
CG12716	90.0408	4.64695	1.25187	3.712	0.000205629	0.00297965
Lk	1855.89	2.63095	0.710051	3.7053	0.000211142	0.00305585
CG42867	50.7322	6.87347	1.85635	3.70269	0.000213324	0.00308374
BicC	90.1155	-3.25094	0.878187	-3.70187	0.000214014	0.00308739
CCHa1r	1926.67	-3.3861	0.914721	-3.70178	0.000214089	0.00308739
CG18088	393.172	6.53702	1.76666	3.70022	0.000215411	0.00310275
CG3819	779.347	6.63601	1.79387	3.69928	0.000216214	0.00311059
CR43051	418.009	7.14429	1.93221	3.69747	0.000217758	0.00312613
CG9134	1094.69	4.3956	1.18883	3.69741	0.000217813	0.00312613
CG7142	409.466	3.66039	0.991144	3.6931	0.000221541	0.00317209
CG15556	593.163	6.87186	1.86059	3.69337	0.000221301	0.00317209
Poc1	372.492	-4.87913	1.32177	-3.69135	0.000223066	0.00319014
CG31200	1765.16	3.97166	1.07645	3.68958	0.000224629	0.00320868
CG16772	8488.07	6.69186	1.81405	3.68891	0.000225218	0.00321328
d	164.806	5.57577	1.51214	3.68735	0.000226603	0.00322389
Mcm2	41.942	5.24123	1.42142	3.68731	0.000226639	0.00322389
l(1)G0148	5491.4	-1.91435	0.519235	-3.68687	0.00022703	0.00322389
upd3	1631.35	7.52701	2.04141	3.68716	0.000226774	0.00322389
Wnt4	577.687	2.58727	0.702774	3.68152	0.000231851	0.00328847
CG13460	37.5212	-8.53823	2.32084	-3.67894	0.000234202	0.00331791
knrl	993.072	13.5817	3.69397	3.67671	0.000236259	0.00334312
CG10936	65.3944	5.41131	1.47294	3.67382	0.000238954	0.00337729
CG31810	116.026	7.08744	1.93081	3.67072	0.000241869	0.00341449
hebe	2301.82	7.06016	1.92471	3.66817	0.000244293	0.00344264
igl	85188.8	-2.2692	0.618645	-3.66802	0.000244434	0.00344264
CG44088	76.3283	3.39106	0.925047	3.66582	0.000246545	0.00346832
CG5167	1068.28	2.90121	0.791519	3.66537	0.000246984	0.00347044
CG6701	2907.08	5.37587	1.46709	3.6643	0.000248015	0.00347729
Gyc88E	4530.08	-2.46262	0.672062	-3.66427	0.000248048	0.00347729
CG13086	60.2834	6.54299	1.7862	3.66308	0.000249202	0.00348941
CG18067	45101.1	12.1062	3.30649	3.66135	0.000250891	0.00350897
CG4078	1039.91	1.81874	0.497038	3.65916	0.000253042	0.00353496
Magi	1693.92	-1.93643	0.529245	-3.65885	0.00025335	0.00353516
serp	359.294	4.28228	1.17097	3.65703	0.000255152	0.00355475
CG14883	14937.9	-2.33983	0.63985	-3.65684	0.000255343	0.00355475
scyl	30088.9	-2.37638	0.650331	-3.65412	0.00025807	0.00358857
CG13315	948.283	3.72633	1.02013	3.65279	0.000259409	0.00359476
CG42571	40.7764	8.97192	2.45582	3.65333	0.000258858	0.00359476
Dh44	9428.98	2.46912	0.675935	3.6529	0.000259298	0.00359476
h	12095.2	4.45104	1.21909	3.65111	0.000261113	0.00361421
by	1580.23	3.87283	1.06148	3.64853	0.000263744	0.00364644
IP3K2	1451.74	5.51633	1.51251	3.64714	0.00026518	0.00366209
Samuel	628.852	5.2747	1.4473	3.64452	0.000267892	0.00369531
CG5002	884.92	5.42038	1.4884	3.64174	0.000270804	0.00373122
CG17323	1041.6	3.70636	1.01858	3.63875	0.000273969	0.00377052
CG11671	271.958	6.23471	1.71489	3.63564	0.000277293	0.00381191
Atf-2	79090.6	-2.22488	0.612669	-3.63145	0.000281836	0.00386995
CG12159	13318.9	-2.08035	0.573099	-3.63	0.000283425	0.00388734
ppk25	75.1475	3.82183	1.05312	3.62905	0.000284466	0.00389718
vir-1	21041.8	3.78097	1.04205	3.62841	0.000285173	0.00389801
Vha100-4	121.318	10.5477	2.90681	3.62862	0.000284944	0.00389801
CG3014	1692.15	-1.89673	0.523386	-3.62397	0.00029012	0.00396114
CG7889	1230.85	-1.98658	0.548231	-3.62362	0.00029051	0.00396198
CG33795	106.168	-4.33938	1.19804	-3.62206	0.000292263	0.00398139
ppk10	51.5342	4.08589	1.12877	3.61978	0.00029485	0.00401209
lectin-37Da	116.551	6.77203	1.87167	3.61817	0.000296693	0.00403261
c-cup	2513.15	-3.15155	0.87129	-3.61711	0.00029791	0.00404004
CG9664	264.551	2.49184	0.688894	3.61715	0.000297862	0.00404004
cav	1313.41	-1.82871	0.506293	-3.61196	0.000303888	0.00411648
CR44095	493.972	4.55331	1.26249	3.60661	0.00031022	0.00419755
Rab9E	55.2552	4.48772	1.24444	3.6062	0.000310714	0.00419951
CG42365	1422.53	-1.84068	0.51082	-3.60339	0.000314096	0.00424047
Side	4393.05	-1.99293	0.553284	-3.60199	0.000315788	0.00425855
sktl	1029.37	6.26827	1.74057	3.60127	0.000316663	0.00426082
CG11052	35.8911	7.34817	2.04034	3.60144	0.000316459	0.00426082
gk	1180.2	7.41054	2.06225	3.59342	0.000326371	0.00438361
CR33963	87.4788	8.6434	2.40542	3.5933	0.000326516	0.00438361
alpha-Est10	919.813	3.84117	1.06944	3.59176	0.000328457	0.00440476
CG13116	1308.72	4.10567	1.14371	3.58977	0.000330964	0.00443345
Dscam2	27897.1	1.9525	0.544542	3.58558	0.000336335	0.0045004
CG13841	330.602	4.76506	1.3295	3.58409	0.000338255	0.00452107
CG5397	1198.83	4.92871	1.37549	3.58325	0.00033935	0.00452567
CG32170	629.973	7.45986	2.08176	3.58344	0.000339098	0.00452567
CG13024	683.722	5.86704	1.63783	3.58219	0.00034072	0.00453891
CG8964	760.978	2.83655	0.792356	3.5799	0.00034373	0.00456892
CG5789	1804.16	-2.42203	0.676537	-3.58004	0.00034354	0.00456892
CG13055	3208.95	-2.36527	0.660947	-3.5786	0.000345434	0.00458652
CG15890	512.577	4.04734	1.13126	3.57773	0.000346589	0.00459678
CG15161	191.66	-5.3155	1.4862	-3.57657	0.000348137	0.00461224
Tcp-1eta	5759.12	-1.71403	0.479549	-3.57426	0.000351218	0.00464795
grh	1024.23	5.24108	1.46733	3.57185	0.000354467	0.00468581
mir-252	49.8951	-4.24203	1.18787	-3.57113	0.000355438	0.0046935
vri	34042.7	-3.16445	0.886207	-3.57078	0.000355924	0.00469477
CG42388	945.198	3.42708	0.959897	3.57026	0.000356628	0.00469892
GRHRII	785.247	2.50158	0.700894	3.56913	0.000358164	0.004714
CG43331	31.9932	6.16924	1.72946	3.56716	0.000360876	0.00474451
CG13579	3036.1	2.78633	0.781566	3.56505	0.000363782	0.00477231
CG32557	247.654	-3.70637	1.03956	-3.56533	0.000363395	0.00477231
Fas3	3311.85	4.06233	1.13971	3.56434	0.000364774	0.00478012
Rab2	55792	-1.8141	0.509095	-3.56338	0.000366107	0.00479239
Tsp42Ed	5438.16	4.406	1.23747	3.56048	0.000370173	0.00484035
CG7759	834.875	3.94389	1.108	3.55945	0.000371633	0.00485418
CG15279	438.23	4.56075	1.28329	3.55394	0.000379507	0.00495167
hig	45186.1	1.66159	0.467642	3.55312	0.000380687	0.00495777
Zasp52	2337.84	3.11112	0.875691	3.55276	0.000381209	0.00495777
TMS1	79875	-1.75401	0.493686	-3.55288	0.00038104	0.00495777
CG16704	178.299	6.7135	1.89091	3.5504	0.000384639	0.00499651
CG3348	1958.42	3.46184	0.975125	3.55015	0.000385017	0.00499651
CG43139	59.3728	9.51531	2.68105	3.5491	0.000386551	0.00501103
CG32655	705.087	2.11865	0.59707	3.54842	0.000387555	0.00501866
Osi14	106.886	10.3649	2.92158	3.54769	0.000388633	0.0050272
CG2121	476.517	6.74707	1.90249	3.54644	0.000390476	0.00504563
nimB2	1079.79	3.84912	1.08607	3.54407	0.000394005	0.00508578
CG13051	51.5627	-6.90504	1.94874	-3.54333	0.000395108	0.00509457
ds	381.625	5.66648	1.59981	3.54197	0.000397156	0.0051155
otk	836.015	2.93114	0.828143	3.53941	0.000401021	0.00515978
Vha100-2	5693.86	5.80924	1.64165	3.53865	0.000402182	0.00516919
CG10799	295.107	5.73397	1.6219	3.53533	0.000407261	0.0052289
CG15611	766.227	4.24963	1.20347	3.53114	0.000413769	0.0053068
CG15067	1169.23	7.19242	2.03822	3.52877	0.000417491	0.00534886
ctrip	19445.3	-1.79688	0.509259	-3.52843	0.00041804	0.00535021
CG10336	277.496	2.5164	0.713339	3.52763	0.000419295	0.00536058
CG5984	204.541	-3.12997	0.887397	-3.52713	0.000420086	0.00536499
CG14526	556.731	3.84927	1.09171	3.5259	0.000422049	0.00538436
CG13794	359.225	4.53001	1.28525	3.52462	0.000424086	0.00540463
CG11191	24389.6	-3.34835	0.950292	-3.5235	0.000425891	0.00541619
CG9896	8852.26	2.97021	0.842941	3.52363	0.000425685	0.00541619
CG32687	509.977	4.36128	1.23846	3.52155	0.000429031	0.00545036
CG9705	12108.3	-1.82707	0.519067	-3.51991	0.000431686	0.00547832
mRpS21	935.83	1.96819	0.559273	3.51919	0.000432866	0.00548752
CG5001	535.171	5.25781	1.49437	3.51842	0.000434131	0.00549778
CG4050	13283.5	-1.73427	0.492971	-3.51801	0.000434802	0.00550049
CG6006	3073.93	2.10966	0.599962	3.51632	0.000437566	0.00552965
CG9932	8960.95	2.62929	0.747922	3.51546	0.000438999	0.00554043
CG1707	2087.81	-1.91258	0.544124	-3.51497	0.000439797	0.00554043
CG6040	1422.55	3.34175	0.95066	3.51519	0.000439437	0.00554043
CG4592	173.398	5.75707	1.63916	3.5122	0.000444411	0.00558819
CG4325	436.212	6.76375	1.92582	3.51214	0.000444515	0.00558819
esn	1876.69	1.83934	0.524074	3.50969	0.000448635	0.00563411
yuri	1143.29	4.15964	1.18532	3.50929	0.000449299	0.00563657
retinin	2791.03	6.87443	1.9594	3.50845	0.000450733	0.00564869
Lsd-2	4442.94	5.07108	1.44569	3.50772	0.000451967	0.00565827
CG18316	1381.31	-1.8211	0.519326	-3.50665	0.000453781	0.00567509
CG5390	2874.44	4.18304	1.19314	3.50591	0.000455047	0.00568502
mdy	902.819	6.19705	1.76852	3.50409	0.000458165	0.00571805
yellow-h	1637.52	6.31766	1.80313	3.50372	0.000458809	0.00572016
CG17922	17643.5	-2.31964	0.662495	-3.50136	0.000462888	0.00576506
Npc2b	2666.25	4.73066	1.35122	3.50104	0.000463444	0.00576603
Gr77a	90.5448	4.19794	1.19958	3.49951	0.000466115	0.00579328
Cpr76Bc	37.2915	8.84289	2.52724	3.49903	0.000466956	0.00579775
CG13822	213.768	-2.97519	0.850638	-3.4976	0.000469471	0.00582299
CR43833	35.8864	8.7874	2.51291	3.4969	0.000470691	0.00583212
CG5909	687.498	3.53499	1.01124	3.49569	0.000472837	0.00585269
CG31029	407.534	-2.83788	0.812042	-3.49474	0.00047452	0.0058675
blot	4583.07	4.67205	1.337	3.49442	0.000475089	0.00586851
Cpr65Az	116.311	4.34569	1.24383	3.49381	0.000476178	0.00587595
Cyp6g1	794.104	3.79212	1.08658	3.48996	0.000483096	0.00595522
He	61.0132	5.82236	1.66865	3.48928	0.000484331	0.00596384
CG42337	23929.1	-1.82646	0.523488	-3.48903	0.000484785	0.00596384
wdp	2191.08	4.97269	1.42612	3.48686	0.000488736	0.0060002
CG11714	110.603	-2.939	0.842879	-3.48686	0.000488727	0.0060002
CG13252	881.835	3.83257	1.09927	3.48645	0.000489469	0.00600057
CG9759	2526.88	13.4272	3.85142	3.48629	0.000489761	0.00600057
CG17265	331.648	5.38008	1.54486	3.48257	0.000496618	0.00605672
CG8965	1612.93	5.68034	1.63102	3.48268	0.000496417	0.00605672
Dpt	57.2743	5.224	1.49987	3.48297	0.000495881	0.00605672
vib	29048.2	-2.18484	0.627437	-3.48218	0.000497358	0.00605672
CG10824	134.169	3.52269	1.01161	3.48227	0.000497185	0.00605672
CG11951	976.194	6.59014	1.89236	3.48251	0.000496742	0.00605672
sob	1667.09	14.329	4.11554	3.48168	0.000498279	0.00606181
CG44206	255.632	2.98381	0.857974	3.47774	0.000505655	0.00614534
CG11275	562.54	6.08742	1.75217	3.47422	0.000512336	0.00620808
CG6293	808.489	3.36429	0.968362	3.47421	0.000512362	0.00620808
Cyp9f2	4490.49	2.72364	0.783948	3.47426	0.000512264	0.00620808
Rac2	1184.07	4.04323	1.16421	3.47294	0.00051479	0.00622587
aay	4149.81	3.6441	1.04929	3.4729	0.000514863	0.00622587
gsb	61.4885	-5.46028	1.57257	-3.4722	0.000516213	0.00623594
Neurochondrin	33.7444	5.24215	1.51034	3.47085	0.000518815	0.0062611
CG15211	1201.41	4.38894	1.2661	3.4665	0.000527287	0.00635697
ci	403.875	3.08893	0.891155	3.4662	0.000527861	0.00635754
AnnIX	14239.9	3.90398	1.12714	3.46362	0.000532963	0.00641257
Ras64B	9433.82	-1.81568	0.524522	-3.46159	0.000536987	0.00645456
Nep1	14695.9	-1.78008	0.514505	-3.45979	0.000540603	0.00648508
CG32683	3086.72	1.96893	0.569081	3.45985	0.000540486	0.00648508
D	2327.26	3.37532	0.975904	3.45866	0.000542877	0.00650589
Zip3	1081.33	4.89952	1.41687	3.45799	0.000544212	0.00651541
CG2065	642.508	2.88206	0.834102	3.45528	0.000549717	0.00656178
Jhe	580.174	7.17927	2.07773	3.45535	0.000549586	0.00656178
CG11438	249.026	4.44567	1.28656	3.45548	0.000549318	0.00656178
Cyp4p2	3075.89	-2.51817	0.729099	-3.45381	0.000552733	0.00659125
grass	2759.73	2.35596	0.682363	3.45265	0.000555106	0.006613
SmD1	1572.9	-1.88108	0.545464	-3.44858	0.000563541	0.00670686
Act42A	12620.3	-1.98037	0.574362	-3.44794	0.000564874	0.0067161
Ssk	2788.87	3.6521	1.06004	3.44526	0.000570514	0.00677647
Spn28Dc	4427.45	6.41887	1.86477	3.44218	0.000577042	0.00684053
CG32695	44.3168	9.09253	2.64145	3.44225	0.000576886	0.00684053
CG5783	713.302	4.9656	1.44373	3.43942	0.000582959	0.00690388
Proct	59871.7	-2.76061	0.802833	-3.43859	0.00058476	0.00690846
CG42458	2503.97	3.01053	0.875475	3.43874	0.000584422	0.00690846
Esp	226.467	5.39411	1.56876	3.43845	0.000585065	0.00690846
Hs3st-B	6592.6	-2.07739	0.604364	-3.43732	0.000587506	0.0069305
r-l	3722.81	4.21876	1.22766	3.43641	0.000589471	0.00694688
CG30158	4144.85	2.75557	0.802628	3.43319	0.000596518	0.00702307
Sytalpha	17175.6	-2.22599	0.648479	-3.43263	0.000597747	0.00703067
CG18622	3944.85	5.22226	1.52279	3.42941	0.000604885	0.0071077
CG14661	27758.6	11.5942	3.38198	3.42824	0.000607504	0.00713152
CG7059	2164.64	-1.76291	0.514323	-3.42763	0.000608867	0.00714057
CG1443	29877	10.8046	3.15381	3.4259	0.000612768	0.00717933
JhI-21	10734.9	-1.64283	0.479751	-3.42434	0.000616292	0.0072136
Ilp5	28.1603	8.44566	2.4676	3.42262	0.00062021	0.00725243
CG43373	3234.98	-2.03088	0.593558	-3.42154	0.000622674	0.00727418
Dscam3	7166.23	1.82964	0.534853	3.42082	0.00062432	0.00728635
CG7457	43.2339	4.77689	1.39689	3.41967	0.000626982	0.00730328
Sox21a	132.783	5.46555	1.59824	3.41972	0.000626847	0.00730328
CG42300	47.2816	-4.4114	1.29025	-3.41904	0.000628428	0.00731305
CG12728	1260.51	-2.39804	0.702941	-3.41144	0.000646218	0.00751283
cv	663.951	3.09005	0.906549	3.40859	0.000653005	0.00758442
CG10205	101.096	7.30383	2.14354	3.40737	0.00065593	0.00761107
pncr003:2L	164.772	6.00858	1.76382	3.40656	0.000657861	0.00762612
rdo	3798.67	1.84882	0.542964	3.40505	0.000661522	0.0076612
slv	3149.32	-1.66645	0.489497	-3.40442	0.000663049	0.00767152
Edg91	77.0688	5.90638	1.73514	3.40398	0.000664121	0.00767655
CG43071	63.0576	9.60258	2.82404	3.4003	0.000673125	0.00777317
dpr20	6680.42	2.99503	0.881003	3.39956	0.000674937	0.00778664
CG8111	3839.2	-1.76202	0.518413	-3.39887	0.00067665	0.00779894
CG13912	140.518	5.56794	1.63877	3.39764	0.000679696	0.00782657
l(2)efl	1255.7	-2.41758	0.711631	-3.39724	0.000680704	0.0078307
Mctp	2912.25	2.30985	0.680157	3.39605	0.00068366	0.00785721
pirk	778.915	4.68848	1.38114	3.39463	0.000687204	0.00789041
Oatp58Dc	903.928	2.38689	0.703343	3.39363	0.000689716	0.00791172
Cyp28a5	3216	3.45719	1.01892	3.393	0.00069131	0.00791494
mei-P26	110021	1.56623	0.461596	3.39307	0.000691143	0.00791494
Mhc	666.48	6.37413	1.87899	3.39231	0.000693047	0.00792731
CG31646	3914.13	2.23508	0.658944	3.39192	0.000694042	0.00793116
CG15831	514.413	-2.41551	0.712199	-3.39163	0.000694789	0.00793217
Pld	584.165	4.63125	1.36619	3.3899	0.000699188	0.00797485
CG15879	149.065	5.86133	1.7298	3.38843	0.000702933	0.00800998
rdgBbeta	7774.89	-2.55812	0.75518	-3.38744	0.000705494	0.00803157
Nedd8	6273.48	-1.63544	0.483019	-3.38587	0.000709535	0.00806235
CG1988	35.2374	-7.117	2.10183	-3.38609	0.000708958	0.00806235
Dll	979.302	4.04542	1.19782	3.37733	0.000731936	0.00830124
cwo	20371.2	-2.36309	0.699671	-3.37743	0.000731669	0.00830124
oc	1192.17	2.58848	0.766914	3.37519	0.000737642	0.00835809
CG9119	710.748	2.76788	0.821028	3.37124	0.000748316	0.00847107
emc	19819.6	2.96484	0.879606	3.37065	0.000749905	0.0084811
Fhos	2510.28	2.00716	0.595703	3.36939	0.000753339	0.00851195
CG31664	2530.04	-2.33838	0.694142	-3.36874	0.000755139	0.00852431
nec	5421.33	4.72413	1.40275	3.36778	0.000757772	0.00854602
Ptr	457.662	3.5391	1.05204	3.36404	0.000768106	0.00865447
CG31427	64.5644	8.20355	2.43912	3.36333	0.000770077	0.00866858
CG3308	11039.8	1.80549	0.536886	3.3629	0.000771289	0.00867413
Tep4	5129.49	3.54597	1.05534	3.36003	0.000779353	0.00875664
CG3823	390.595	3.80222	1.13195	3.35901	0.000782233	0.00878082
TotX	1213.93	6.14264	1.82975	3.35709	0.000787664	0.00883356
t	415.442	3.17625	0.946287	3.35654	0.000789236	0.00884296
p47	11071.1	-1.76096	0.52474	-3.35587	0.00079116	0.00885629
PpN58A	23.3575	8.17118	2.43536	3.35523	0.000793	0.00886865
CG43902	51997.8	-2.55432	0.761381	-3.35486	0.000794061	0.00887229
ZnT35C	50.9218	5.88136	1.7541	3.35291	0.000799655	0.00892053
CG31809	667.012	5.09828	1.52058	3.35284	0.000799858	0.00892053
CG7084	1555.67	3.37376	1.0064	3.35232	0.000801359	0.00892901
CG11158	839.109	2.23288	0.666485	3.35023	0.000807459	0.00898867
fbp	578.419	5.79417	1.73056	3.34816	0.00081351	0.00902961
CG14752	33.9787	8.70853	2.60064	3.34861	0.00081219	0.00902961
CG13318	75.3787	4.4953	1.3427	3.34794	0.000814133	0.00902961
E(spl)m6-BFM	168.13	-3.90605	1.16659	-3.34827	0.000813168	0.00902961
CG12269	846.2	1.97405	0.590084	3.34537	0.000821723	0.00910542
CG11592	731.724	-2.34495	0.701089	-3.34472	0.000823655	0.00911844
CG14191	1535.65	12.8257	3.83827	3.34152	0.000833206	0.00921572
Nos	3004.94	2.9589	0.885875	3.34009	0.000837519	0.00925493
VAChT	16598.9	2.66939	0.799383	3.33932	0.000839843	0.00927211
CG14086	1135.41	-2.46528	0.738793	-3.3369	0.000847178	0.00934453
CG7011	1588.03	-1.71868	0.515191	-3.33601	0.000849892	0.00936591
Myo10A	769.079	5.40312	1.62058	3.33406	0.000855891	0.00942339
CG14984	1238.73	4.32246	1.29736	3.33172	0.000863104	0.00949414
ara	1037.83	4.78021	1.43518	3.33073	0.000866179	0.00951928
caps	5015.85	2.37058	0.71227	3.32821	0.000874067	0.00959723
CG34398	426.181	6.21836	1.86958	3.32607	0.000880807	0.00964487
fau	271.614	3.53077	1.06152	3.32614	0.000880567	0.00964487
Cad87A	18670.4	-2.10031	0.631438	-3.32623	0.000880284	0.00964487
CG9186	2353.64	2.23524	0.672113	3.3257	0.000881972	0.00964887
CG7607	3114.51	1.72964	0.520502	3.32301	0.00089051	0.00973344
wg	256.836	6.33445	1.90756	3.32071	0.000897884	0.00980515
CR43717	30.9964	8.5758	2.58448	3.31819	0.000906023	0.00987937
CG32195	462.321	3.01123	0.907517	3.3181	0.000906319	0.00987937
TTLL3A	542.732	-2.13683	0.644466	-3.31565	0.000914299	0.00993939
RhoL	2409.99	4.92996	1.48678	3.31585	0.000913647	0.00993939
stumps	578.852	2.02465	0.610608	3.3158	0.000913815	0.00993939
sqa	375.137	5.78263	1.74457	3.31464	0.000917599	0.00996629
CG1600	51850.8	-1.59705	0.481936	-3.31383	0.000920288	0.00997751
CG16926	289.085	4.98766	1.50504	3.31396	0.000919842	0.00997751
CG15021	3337.66	5.94004	1.79438	3.31036	0.000931772	0.0100929
Dh31	50462.5	-2.29155	0.692329	-3.30992	0.000933237	0.0100997
amd	1622.08	6.53306	1.97503	3.30783	0.000940207	0.010166
GEFmeso	1984.67	2.11631	0.63994	3.30705	0.000942855	0.0101764
kar	1231.18	3.21396	0.971832	3.30711	0.000942626	0.0101764
lz	91.2391	5.55894	1.68161	3.30573	0.000947301	0.0102153
CG5322	355.654	4.60395	1.3929	3.3053	0.00094876	0.0102219
Cht2	1350.75	4.32864	1.30995	3.30444	0.000951678	0.0102441
CG43915	28.3534	-6.80086	2.05878	-3.30335	0.000955372	0.0102747
CG4914	22.6273	8.12709	2.46083	3.30258	0.000957989	0.0102937
nwk	38436.1	1.60204	0.485583	3.29921	0.00096958	0.0104077
CG42550	106.127	-2.76916	0.839395	-3.29899	0.000970325	0.0104077
CG13124	3298.62	2.54031	0.770177	3.29835	0.000972564	0.0104132
Cralbp	41.1762	8.98646	2.7244	3.29851	0.000972003	0.0104132
Syt12	2915.32	1.94344	0.589317	3.29778	0.000974525	0.0104249
CG2837	525.715	5.80416	1.7603	3.29725	0.00097635	0.0104352
CG17843	30.7931	7.13622	2.16672	3.29356	0.000989272	0.0105639
Klp31E	3373.99	-2.22541	0.676057	-3.29175	0.000995673	0.0106229
CG7770	9556.08	-1.60519	0.487753	-3.291	0.000998325	0.0106417
CG6766	14925.6	-1.56323	0.475232	-3.28941	0.00100399	0.0106832
bou	764.484	3.18558	0.968383	3.28959	0.00100335	0.0106832
CG11034	292.782	5.6078	1.70547	3.28813	0.00100857	0.0107225
Glu-RI	3662.89	2.2102	0.672282	3.28761	0.00101043	0.0107329
CG4269	563.545	5.88079	1.78945	3.28637	0.00101487	0.0107705
CG15630	16629.1	-2.03603	0.619945	-3.28422	0.00102267	0.0108437
tok	7485.51	1.86657	0.568598	3.28276	0.00102797	0.0108904
esg	373.699	4.71101	1.43565	3.28146	0.00103272	0.010931
sut2	853.432	3.594	1.09544	3.28086	0.00103492	0.0109447
CG8460	4155.93	-1.61714	0.493171	-3.27907	0.00104149	0.0109923
CaBP1	16860.5	-1.81071	0.552164	-3.27929	0.00104069	0.0109923
CG10700	35.3046	8.76396	2.67284	3.27889	0.00104215	0.0109923
fd59A	967.242	3.25434	0.992687	3.27831	0.00104431	0.0110054
CG7201	71.4603	9.78353	2.98513	3.27742	0.00104759	0.0110303
TrpA1	505.344	3.58548	1.09428	3.27655	0.00105084	0.0110549
egr	1881.63	4.33044	1.32181	3.27614	0.00105235	0.0110611
dila	230.794	5.99515	1.83043	3.27526	0.00105564	0.011086
fkh	6686.57	3.49875	1.06852	3.2744	0.00105888	0.0111104
CG15701	661.335	-2.08722	0.637691	-3.27309	0.00106377	0.011152
Ilp2	1053.2	2.8813	0.880412	3.27268	0.00106535	0.0111588
Cdc6	26.2509	8.33607	2.5493	3.26994	0.0010757	0.0112576
CR44197	38.2869	8.88127	2.71652	3.26936	0.00107793	0.0112581
ETHR	1514.51	-2.04293	0.624903	-3.26919	0.00107855	0.0112581
alrm	3747.13	2.49141	0.761994	3.2696	0.00107701	0.0112581
CG31875	77.1704	5.90453	1.80746	3.26675	0.00108789	0.0113291
RluA-1	965.545	2.53829	0.777025	3.26668	0.00108818	0.0113291
CG14946	1802.97	3.09224	0.946529	3.26693	0.00108722	0.0113291
Tig	654.423	4.54115	1.39065	3.26549	0.00109276	0.011367
Cyp6a8	63.911	4.44604	1.36229	3.26366	0.00109984	0.0114111
CG34404	25289.2	-2.0216	0.619352	-3.26405	0.00109832	0.0114111
CG4678	11078.3	2.01297	0.61674	3.26389	0.00109894	0.0114111
CG8565	95.4123	-4.36194	1.33668	-3.26326	0.00110139	0.0114173
cbt	12168.9	-1.80178	0.55222	-3.26279	0.00110322	0.0114264
CG8654	359.515	4.50593	1.38154	3.26153	0.00110815	0.0114368
CG6216	30.2147	8.5389	2.61783	3.26182	0.00110698	0.0114368
CG13053	873.483	2.02785	0.621753	3.26151	0.00110821	0.0114368
CG3984	164.417	-5.60192	1.71734	-3.26198	0.00110638	0.0114368
CG9723	2568.94	-2.1751	0.666939	-3.26132	0.00110896	0.0114368
sgl	10614.8	2.96005	0.907698	3.26105	0.00110999	0.0114376
CG31522	45381.5	3.92419	1.20434	3.25836	0.00112059	0.011537
CG34172	279.109	5.58088	1.71336	3.25727	0.0011249	0.0115516
CG17108	14847.1	5.10035	1.5657	3.25756	0.00112375	0.0115516
CG13678	29.5122	8.50492	2.61125	3.25703	0.00112584	0.0115516
CG14463	1794.81	-1.7223	0.528742	-3.25736	0.00112453	0.0115516
CG34351	5389.41	1.89294	0.581492	3.25532	0.00113265	0.0116083
Gli	2769.35	4.78769	1.4708	3.25516	0.00113329	0.0116083
CG43329	29.2378	7.01844	2.1568	3.25411	0.00113749	0.0116414
erm	1201.96	2.57617	0.792103	3.25231	0.0011447	0.0117053
CG1275	116117	-2.14851	0.661291	-3.24897	0.00115825	0.011823
dpr16	1733.56	2.24158	0.689948	3.24892	0.00115845	0.011823
CG11843	977.052	4.74509	1.46059	3.24874	0.00115916	0.011823
HIP	1597.28	-1.60819	0.495108	-3.24816	0.00116155	0.0118374
CG7006	860.66	-2.15641	0.663936	-3.24791	0.00116255	0.0118376
CG14239	21.8456	8.07644	2.48697	3.2475	0.00116423	0.0118447
CG34445	26.6091	8.35551	2.57396	3.24617	0.00116967	0.01189
CG14082	971.979	-2.25143	0.693677	-3.24564	0.00117187	0.0119023
CG11529	493.604	4.15754	1.28248	3.24179	0.00118781	0.0120541
CG31121	186.423	5.96548	1.84046	3.24129	0.00118989	0.012065
CG30427	9641.19	10.5398	3.25313	3.2399	0.00119573	0.0121114
Ugt86Dh	32.8527	8.65991	2.67304	3.23972	0.00119647	0.0121114
CG9572	882.544	6.6378	2.04973	3.23838	0.00120209	0.0121581
et	200.218	3.32626	1.02754	3.23711	0.00120747	0.0122022
CG3277	269.485	3.86539	1.19498	3.2347	0.00121772	0.0122674
LanB1	1948.16	4.67779	1.44609	3.23479	0.00121733	0.0122674
CG13283	169.678	5.45838	1.68766	3.23429	0.00121945	0.0122674
Cyp6w1	350.395	5.5507	1.7162	3.23429	0.00121944	0.0122674
CG4409	2865.97	2.09308	0.647181	3.23416	0.00122002	0.0122674
CG6839	130.042	6.67133	2.06228	3.23493	0.0012167	0.0122674
CG10970	2182.66	4.23504	1.31046	3.23171	0.00123052	0.0123626
CG15333	467.623	-3.60196	1.11473	-3.23125	0.00123249	0.0123721
NepYr	1371.02	-1.94515	0.602058	-3.23084	0.00123429	0.0123799
isoQC	2521.78	-1.50498	0.465853	-3.23059	0.00123535	0.0123802
18w	1985.75	2.75699	0.853792	3.22911	0.00124174	0.0124339
CG42732	11175.3	1.80482	0.55917	3.22768	0.00124797	0.0124727
CG6282	7291.78	2.7488	0.851573	3.22791	0.00124697	0.0124727
CG11652	3210.37	-2.00466	0.621115	-3.22751	0.00124871	0.0124727
abba	123.092	3.78832	1.17387	3.22721	0.00125002	0.0124754
CG4752	435.338	4.56503	1.41503	3.22611	0.00125487	0.0125114
CG18599	177.297	3.7798	1.1717	3.22592	0.0012557	0.0125114
EcR	6268.23	1.54134	0.477856	3.22553	0.00125742	0.0125142
CG10257	608.15	3.5761	1.10874	3.22538	0.00125806	0.0125142
Unc-89	277.913	3.26577	1.01294	3.22407	0.00126385	0.0125552
CG43693	5954.48	4.06657	1.26137	3.22393	0.00126443	0.0125552
Lasp	1018.71	2.93271	0.909792	3.2235	0.00126635	0.0125552
hb	275.546	2.0328	0.630593	3.22362	0.0012658	0.0125552
CG12974	386.514	4.76174	1.4784	3.22089	0.00127795	0.0126588
Gyc-89Db	1090.24	2.25134	0.699027	3.22067	0.0012789	0.0126588
Sclp	617.264	3.84012	1.19254	3.22012	0.00128139	0.012673
CG11200	9641.41	4.00628	1.2444	3.21946	0.00128434	0.0126816
Sox21b	1402.82	3.31917	1.03097	3.21945	0.00128436	0.0126816
CG33792	855.433	-4.39834	1.36749	-3.21635	0.00129833	0.0128091
Fili	1526.97	1.57351	0.489826	3.21237	0.00131643	0.0129584
CG34205	27271.4	11.0642	3.44476	3.2119	0.00131859	0.0129584
app	26619.9	-2.01818	0.628355	-3.21185	0.00131884	0.0129584
CG9391	17988.1	-1.55471	0.48404	-3.21195	0.00131839	0.0129584
CG32599	112.998	-2.7873	0.867702	-3.21228	0.00131685	0.0129584
GstE2	944.942	3.09427	0.963786	3.21054	0.00132487	0.013007
Mtp	3546.42	-1.89332	0.589925	-3.20942	0.00133001	0.0130469
CG43333	76.0276	-4.82281	1.50346	-3.20781	0.00133751	0.0130935
Tsp42Eh	1070.02	5.09963	1.58981	3.2077	0.00133803	0.0130935
eff	37282.4	-1.50971	0.470638	-3.20779	0.0013376	0.0130935
gbb	497.819	2.6158	0.815771	3.20654	0.00134343	0.0131357
CG9806	117.625	-2.64439	0.824806	-3.20608	0.00134557	0.013146
CR44050	192.91	2.16348	0.674938	3.20545	0.0013485	0.013164
eys	9371.48	2.13209	0.665609	3.20322	0.00135898	0.0132556
CAH1	212.807	2.68874	0.839686	3.20208	0.00136438	0.0132975
7B2	376074	-2.28277	0.713075	-3.2013	0.00136808	0.013322
Vps45	4313.48	-1.5549	0.485741	-3.20109	0.00136911	0.013322
srp	421.864	4.39993	1.37463	3.20082	0.00137039	0.0133238
CG12268	508.345	6.98754	2.18338	3.20034	0.00137266	0.0133243
CR43496	164.13	4.59689	1.43629	3.20054	0.0013717	0.0133243
CG18268	276.133	3.00921	0.940515	3.19953	0.0013765	0.0133508
CG30419	2795.15	2.17703	0.680907	3.19725	0.00138746	0.0134463
Gal	124.938	2.98653	0.934293	3.19657	0.00139072	0.013467
CG14141	1466.26	2.24781	0.703345	3.19588	0.00139405	0.0134885
Nep2	10785.8	-2.55645	0.800622	-3.19308	0.00140765	0.0135982
fs(1)M3	444.619	-2.88989	0.90503	-3.19315	0.00140731	0.0135982
Scp1	882.398	3.51582	1.10212	3.19006	0.00142244	0.0137301
CG5172	336.616	6.28801	1.97156	3.18935	0.00142593	0.0137528
Pal1	9798.75	-1.62487	0.509546	-3.18886	0.00142837	0.0137653
CG2736	275.402	7.02629	2.20373	3.18836	0.00143082	0.0137779
CG7992	257.475	-2.99847	0.940707	-3.18747	0.00143525	0.0138095
pes	1716	2.70848	0.850341	3.18517	0.00144667	0.0139084
CG43679	376.833	4.87493	1.53074	3.18468	0.00144913	0.0139209
Cyp28d1	2294.72	2.34119	0.735237	3.18427	0.0014512	0.0139279
slbo	119.781	4.72926	1.48529	3.18407	0.00145218	0.0139279
CG11693	157.623	6.95289	2.18565	3.18115	0.00146691	0.0140581
p38c	288.875	6.0873	1.91388	3.18061	0.00146966	0.0140732
CG6401	1746.76	-2.1474	0.6756	-3.17851	0.00148032	0.0141641
CR43637	256.601	-2.25812	0.710489	-3.17827	0.00148157	0.0141648
lea	1515.03	3.36497	1.05974	3.17528	0.00149693	0.0142664
CG9497	476.578	2.73727	0.861954	3.17566	0.00149497	0.0142664
CG9449	4156.68	10.1916	3.20918	3.17577	0.00149439	0.0142664
CG32547	9597.48	-2.10169	0.661889	-3.17529	0.00149688	0.0142664
CG34371	3363.21	2.83783	0.894217	3.17353	0.00150595	0.0143357
Ugt86De	24.2687	6.78287	2.13741	3.17341	0.00150658	0.0143357
CG4302	389.326	3.67195	1.1573	3.17285	0.00150949	0.014352
yellow-d	1884.71	4.13861	1.30462	3.17227	0.00151254	0.0143697
CG8841	7049.26	-1.74026	0.548627	-3.17203	0.00151377	0.0143701
CG4324	65.8366	4.66222	1.47	3.17157	0.00151615	0.0143814
GV1	401.467	5.79367	1.82772	3.1699	0.00152492	0.0144531
sn	6528.56	-2.28656	0.721998	-3.167	0.00154023	0.0145868
Act57B	299.376	3.72073	1.17499	3.1666	0.00154233	0.0145952
CR31781	684.949	6.04294	1.90867	3.16605	0.00154526	0.0146115
CG42394	27611.8	-2.92412	0.923792	-3.16534	0.001549	0.0146354
CG31475	10773.4	-2.43937	0.771599	-3.16145	0.00156987	0.0148209
CG7135	493.798	2.04866	0.648285	3.16013	0.00157699	0.0148765
CG14089	224.302	-5.01218	1.58659	-3.15909	0.00158261	0.0149179
Roe1	1205.59	2.36988	0.750257	3.15876	0.0015844	0.0149231
GstE9	797.759	3.82049	1.20995	3.15756	0.00159093	0.0149659
RhoGAP18B	2210.38	3.40281	1.0777	3.15747	0.00159143	0.0149659
pst	4812.04	5.10773	1.61932	3.15424	0.00160915	0.0151207
Su(var)205	15032.2	-1.71192	0.542813	-3.1538	0.00161161	0.015132
CG42741	63.3513	4.13702	1.31195	3.15335	0.0016141	0.0151436
CG12594	21547.9	-2.45003	0.777152	-3.15257	0.00161839	0.0151721
CG31176	1624.89	5.00591	1.58803	3.15227	0.00162007	0.0151735
CG32628	1883.7	2.05343	0.651451	3.15209	0.00162106	0.0151735
CG13516	955.529	6.20957	1.97115	3.15023	0.00163143	0.0152587
CG32444	696.787	4.58587	1.45597	3.14971	0.00163435	0.0152691
CG15548	43.4262	-5.87805	1.8663	-3.14958	0.00163507	0.0152691
CG16813	25.7078	-6.66098	2.1179	-3.14508	0.0016604	0.0154908
CG6870	133.62	3.94064	1.25302	3.14491	0.00166138	0.0154908
CG42747	877.957	-1.61837	0.514776	-3.14383	0.0016675	0.0155359
CG31803	33.6967	-7.05832	2.24578	-3.14292	0.0016727	0.0155722
CG9782	581.312	4.90106	1.56027	3.14116	0.0016828	0.0156542
Jafrac2	1859.01	-1.49374	0.475642	-3.14047	0.00168676	0.0156789
CG43861	3200.91	4.07696	1.29879	3.13904	0.00169501	0.0157435
CG11413	62.867	4.8015	1.53021	3.13781	0.00170214	0.0157975
CG14731	74.6555	-3.71245	1.18356	-3.13669	0.00170868	0.015846
CG3121	29.9858	-6.1161	1.95097	-3.13491	0.00171909	0.0159304
CG8317	115.004	6.07331	1.93846	3.13305	0.00172998	0.0160189
Spn88Ea	2065.58	3.1265	0.998941	3.12981	0.00174917	0.0161842
CG31145	7252.36	1.4295	0.45682	3.12923	0.00175262	0.0162037
mamo	96100.5	-1.62447	0.519744	-3.12553	0.00177487	0.0163968
GstE3	1272.71	3.3846	1.08317	3.1247	0.00177984	0.0164301
CG17896	5074.88	2.68992	0.860917	3.12448	0.00178121	0.0164302
CG7530	8633.33	4.23685	1.35711	3.12197	0.00179646	0.0165513
CG31213	153.086	3.2807	1.05088	3.12187	0.00179708	0.0165513
Ance-5	1376.72	1.91559	0.613764	3.12105	0.00180206	0.0165844
CG9743	1435.33	3.60983	1.15686	3.12036	0.00180629	0.0166107
CG11961	1683.34	3.54085	1.135	3.11969	0.00181041	0.0166359
Sema-2b	6227.33	2.07508	0.66532	3.11892	0.00181516	0.0166668
Cpr60D	3450.69	-4.71798	1.51291	-3.11847	0.00181792	0.0166706
Arpc3B	293.161	4.5032	1.44407	3.1184	0.00181834	0.0166706
CG4615	7137.48	-1.70426	0.546667	-3.11754	0.00182366	0.0167067
KCNQ	2078.52	2.01651	0.647096	3.11624	0.00183171	0.0167677
Ugt35a	373.334	4.44719	1.42721	3.116	0.00183325	0.0167691
CG3402	4750.86	-1.88883	0.606278	-3.11546	0.00183659	0.0167869
Gr32a	320.975	-1.89979	0.610117	-3.11381	0.00184689	0.0168682
prt	12772	-1.93383	0.621285	-3.11262	0.00185434	0.0169234
CG30178	156.487	-2.32512	0.747184	-3.11184	0.00185922	0.0169424
beta4GalNAcTB	2668.08	-1.49988	0.481988	-3.11186	0.0018591	0.0169424
CG2918	29449.3	-2.02812	0.651895	-3.11111	0.00186384	0.0169717
eyg	24.3814	6.76233	2.17569	3.10813	0.00188275	0.0171209
CG14223	295.583	2.79107	0.898004	3.10808	0.00188307	0.0171209
Tequila	2362.97	2.6372	0.848672	3.10745	0.00188711	0.0171447
CG10462	471.017	3.68874	1.18798	3.10506	0.00190243	0.0172579
bab2	3744.35	2.7153	0.874422	3.10525	0.00190118	0.0172579
CG8089	239.901	-2.97424	0.958205	-3.10397	0.00190941	0.0173082
CG6044	67802	-1.79802	0.579484	-3.10279	0.00191705	0.0173644
rtv	229.535	3.25224	1.0489	3.10063	0.00193108	0.0174783
CG32652	24.412	5.75873	1.85788	3.09963	0.00193764	0.0175245
CG5381	529.172	3.18913	1.02905	3.09909	0.00194118	0.0175434
Rx	876.068	3.92963	1.26836	3.0982	0.00194701	0.0175828
GstE4	23.2455	6.68818	2.15952	3.09706	0.00195448	0.0176239
Femcoat	134.117	6.29934	2.03392	3.09714	0.00195395	0.0176239
svp	918.113	3.41808	1.10378	3.09672	0.00195675	0.0176312
mus301	352.715	-3.58641	1.15833	-3.09619	0.00196026	0.0176496
neb	420.444	2.80326	0.90567	3.09524	0.00196657	0.0176801
CG42674	19068.8	-1.62702	0.525636	-3.09533	0.00196596	0.0176801
CG44142	153.569	6.3264	2.04407	3.095	0.0019681	0.0176806
CG12001	2550.39	-1.74029	0.562437	-3.09419	0.00197351	0.0177161
CG10185	234.64	-2.09012	0.675911	-3.0923	0.00198611	0.0178026
CG6688	713.778	4.45302	1.44002	3.09233	0.00198594	0.0178026
Rh50	2896.45	2.69071	0.871008	3.08919	0.00200702	0.0179767
CG3328	917.081	2.37224	0.768001	3.08885	0.00200932	0.017984
CG4577	468841	-1.80682	0.585318	-3.08691	0.00202252	0.0180886
armi	1665.22	-1.63478	0.529821	-3.08553	0.00203189	0.018159
CG9682	147.49	-2.25097	0.729632	-3.08508	0.00203496	0.018173
Pka-C3	21170.5	-1.90067	0.616424	-3.08338	0.00204665	0.0182638
CG33303	8289.29	-1.44893	0.470163	-3.08176	0.00205779	0.0183497
Dl	586.153	3.43301	1.11416	3.08125	0.00206132	0.0183675
B-H2	91.1812	4.49575	1.45919	3.08099	0.00206315	0.0183702
Elp2	1565.22	1.77423	0.576004	3.08023	0.00206837	0.0183831
dgo	270.235	4.67908	1.51912	3.08013	0.00206909	0.0183831
CG8323	772.055	1.57078	0.510009	3.0799	0.00207069	0.0183831
pHCl	11420.8	1.62142	0.52645	3.07992	0.00207056	0.0183831
CR44224	31.5545	8.60185	2.7935	3.07923	0.00207534	0.0184108
Clc	22983.1	-1.56514	0.508473	-3.07812	0.00208311	0.0184662
Mal-B1	63.3701	3.72176	1.20948	3.07716	0.00208986	0.0185124
Spindly	438.12	-2.34792	0.763129	-3.07671	0.002093	0.0185266
Karl	1148.77	3.15001	1.02501	3.07313	0.00211825	0.0187364
Egfr	403.184	5.98353	1.94749	3.07243	0.00212324	0.0187667
wtrw	7831.57	3.41534	1.11216	3.0709	0.00213417	0.0188461
CG14811	288.339	-2.91579	0.949542	-3.07073	0.00213535	0.0188461
CG4267	409.133	5.77912	1.88219	3.07043	0.00213752	0.0188515
Asph	1152.63	3.23155	1.05327	3.06812	0.00215409	0.0189837
SmF	1834.09	-1.55742	0.507649	-3.0679	0.00215567	0.0189838
CG10098	16663.2	-2.05428	0.669677	-3.06756	0.00215812	0.0189857
Tis11	2014.1	3.98447	1.29896	3.06743	0.00215904	0.0189857
CG30183	2480.75	-1.6466	0.536916	-3.06678	0.00216382	0.0190138
smp-30	335.784	2.9488	0.961697	3.06625	0.00216764	0.0190335
CG18135	5419.6	1.92783	0.62878	3.06599	0.00216953	0.0190363
GstD10	508.075	4.15396	1.35498	3.0657	0.00217158	0.0190404
CG42393	206.115	2.77595	0.907	3.06058	0.00220908	0.0193552
CG42757	1429.3	2.98782	0.976768	3.05889	0.00222162	0.0194508
CG30499	1507.9	2.61789	0.855997	3.0583	0.002226	0.0194747
CG11686	1174.59	4.69124	1.53404	3.05808	0.00222757	0.0194747
CG30456	1035.21	5.64729	1.84718	3.05724	0.00223384	0.0195153
Rac1	14966.3	-1.47963	0.484078	-3.05659	0.00223873	0.0195439
pan	30115.4	1.42398	0.466161	3.05469	0.00225295	0.0196538
Jheh3	484.236	2.30859	0.756507	3.05164	0.00227592	0.0198398
proPO45	5930.84	4.49996	1.47495	3.05092	0.00228138	0.0198731
CG14573	32.3901	7.17325	2.35214	3.04968	0.00229088	0.0199414
Spn43Ab	2129.75	2.4242	0.795775	3.04634	0.00231643	0.0201493
betaTub97EF	1315	2.76986	0.909331	3.04604	0.00231876	0.020155
CG13075	112.492	-2.49788	0.820115	-3.04577	0.00232087	0.0201588
kek5	3627.34	1.52764	0.501669	3.04511	0.00232591	0.0201881
CG17919	2283.31	3.22174	1.05841	3.04396	0.00233489	0.0202514
ntc	1637.8	-1.57986	0.51931	-3.04223	0.00234834	0.0203388
CG3999	228.576	-1.94672	0.639877	-3.04233	0.00234752	0.0203388
CG30093	117.012	5.75827	1.89302	3.04185	0.00235133	0.02035
CG32365	432.161	2.73842	0.900486	3.04105	0.00235754	0.0203892
CG15628	39840.4	-1.79867	0.591643	-3.04013	0.00236476	0.020437
y	76.2664	5.29489	1.74195	3.03964	0.00236862	0.0204556
CG15046	150.399	4.67134	1.53731	3.03864	0.00237648	0.0205089
ea	491.946	3.50454	1.15381	3.03736	0.00238657	0.0205812
CG30273	584.376	3.73619	1.23191	3.03284	0.00242264	0.0208773
ths	3234.83	1.53002	0.504566	3.03235	0.00242657	0.0208963
CG7110	486.31	2.63357	0.868652	3.03179	0.00243111	0.0209204
CG42541	20742.3	2.62543	0.866752	3.02905	0.00245324	0.0210958
CG11825	453.949	5.46431	1.80459	3.02801	0.00246172	0.0211302
Treh	32451.9	3.13596	1.03565	3.028	0.00246179	0.0211302
beat-IIa	7611.78	2.21262	0.730742	3.02791	0.0024625	0.0211302
LanB2	825.712	3.64069	1.20327	3.02566	0.0024809	0.0212729
Mct1	1712.66	-1.88794	0.624053	-3.02529	0.00248397	0.0212841
CG5196	18995.6	-1.57664	0.52193	-3.02078	0.00252122	0.0215727
Irc	3159.99	2.46447	0.815818	3.02086	0.00252057	0.0215727
CG9505	41.3671	5.58438	1.84884	3.02047	0.00252382	0.0215795
Cdk4	468.029	3.50564	1.16074	3.02018	0.00252626	0.0215852
TpnC41C	549.8	12.7288	4.21511	3.0198	0.00252945	0.0215971
CG13203	309.574	1.9495	0.646228	3.01673	0.00255514	0.021801
Flo-1	19520.6	-1.64565	0.545571	-3.01639	0.00255807	0.0218105
fz3	1198.42	4.55163	1.50955	3.01522	0.00256794	0.0218793
betaTub60D	1338.22	3.79704	1.25984	3.01389	0.00257918	0.0219595
Vha68-2	4575.09	3.74026	1.24116	3.01353	0.00258228	0.0219704
CG8738	569.993	5.65763	1.87815	3.01234	0.00259243	0.0220256
mab-21	671.977	2.59916	0.862791	3.0125	0.00259103	0.0220256
CG31728	39.379	6.51144	2.16188	3.01193	0.00259589	0.0220275
CG14834	408.648	-1.83436	0.60904	-3.01188	0.00259631	0.0220275
beat-IIIb	6426.94	2.04079	0.677722	3.01124	0.00260179	0.0220585
CG12065	787.301	3.8322	1.27385	3.00837	0.00262649	0.022246
D2R	5055.2	1.79987	0.598313	3.00825	0.0026276	0.022246
CG7409	531.696	1.84131	0.61242	3.00662	0.00264172	0.0223499
Cpr62Bc	21.4539	8.04468	2.67729	3.00479	0.00265765	0.0224579
CG10405	109.483	2.81801	0.937858	3.00473	0.00265821	0.0224579
CG9344	1034.76	-1.6196	0.539073	-3.00441	0.00266096	0.0224653
CG31910	21.2464	-6.38355	2.12565	-3.00311	0.00267233	0.0225456
CG11836	456.668	3.05965	1.01891	3.00287	0.00267447	0.0225479
cindr	16493.6	2.00023	0.666378	3.00165	0.0026852	0.0226225
sli	15835	-1.72027	0.573422	-3.00001	0.0026997	0.0227287
Crc	59223	-1.49564	0.498585	-2.99977	0.00270188	0.0227312
rumi	1858.78	-1.79598	0.598979	-2.99841	0.00271394	0.0228168
or	3741.75	-1.59944	0.533698	-2.99691	0.00272735	0.0228976
CG31076	19.0534	7.87523	2.62764	2.99707	0.00272587	0.0228976
CG11660	520.794	1.63459	0.545803	2.99484	0.00274589	0.0230372
upd2	468.783	6.79548	2.26984	2.99382	0.0027551	0.0230984
pros	123557	2.50219	0.835867	2.99352	0.00275775	0.0231045
Or98a	23.0259	6.70367	2.23991	2.99283	0.00276401	0.0231409
Cyp6v1	971.578	6.07522	2.03017	2.99248	0.00276724	0.0231519
CG13889	1399.44	-2.82663	0.944763	-2.99189	0.00277252	0.0231639
CG5191	13060	3.03823	1.01548	2.99192	0.00277227	0.0231639
CG4019	472.776	5.30054	1.77309	2.98944	0.00279489	0.0233195
Notum	173.34	5.96797	1.99663	2.98902	0.00279876	0.0233195
CG8420	18.6952	7.84839	2.62574	2.98902	0.00279878	0.0233195
Lin29	6268.61	2.06566	0.691085	2.989	0.00279888	0.0233195
ana3	327.726	-1.93562	0.648194	-2.98617	0.00282497	0.0235008
CG32791	2582.46	2.79919	0.937436	2.986	0.00282648	0.0235008
B-H1	347.481	4.56624	1.52916	2.98611	0.00282553	0.0235008
CG34423	32.1609	4.58069	1.53429	2.98554	0.00283074	0.0235199
CG10440	2301.19	2.58184	0.864885	2.98519	0.00283406	0.0235313
Det	901.807	-1.96886	0.659881	-2.98366	0.0028482	0.0236325
Rrp4	716.272	-1.63545	0.548229	-2.98316	0.00285292	0.0236553
eya	202.607	1.99539	0.668933	2.98294	0.00285491	0.0236556
Clect27	10098.1	10.0062	3.35572	2.98183	0.00286529	0.0237089
DNApol-alpha180	50.4652	4.21884	1.4148	2.98194	0.00286428	0.0237089
Rcd2	2783.43	3.3883	1.13746	2.97882	0.0028936	0.0239267
JhI-26	93.9744	4.09515	1.375	2.97829	0.00289865	0.0239521
CG14966	810.157	-1.54099	0.517499	-2.97776	0.00290365	0.0239725
CG14142	371.697	3.67814	1.23527	2.97761	0.0029051	0.0239725
Dbx	236.6	3.2076	1.07757	2.9767	0.00291369	0.024027
ptip	5478.01	-1.42162	0.47793	-2.97454	0.00293424	0.0241799
Tehao	645.36	2.14987	0.722916	2.97388	0.00294059	0.0242156
CG15650	138.261	-4.08106	1.37243	-2.9736	0.00294329	0.0242214
CG30289	38.1409	5.877	1.97796	2.97125	0.00296593	0.0243911
nemy	1207.9	1.87401	0.630814	2.97077	0.0029705	0.0244119
Buffy	1158.52	3.28722	1.10724	2.96883	0.00298939	0.0245504
CG13646	51.9713	-3.59857	1.21268	-2.96746	0.00300269	0.0246429
nrv2	13141	1.72931	0.582877	2.96686	0.00300859	0.0246745
CG5541	2499.47	3.34124	1.1268	2.96526	0.00302431	0.0247866
CG1092	1608.29	3.65902	1.23431	2.96443	0.00303248	0.0248366
cas	113.742	-2.3987	0.809275	-2.96401	0.00303654	0.024853
CG42493	20.8443	8.00304	2.70097	2.96303	0.0030463	0.024916
Cyp305a1	502.076	2.79083	0.942014	2.96262	0.00305036	0.0249323
CG6287	2652.47	2.64493	0.893137	2.9614	0.00306248	0.0249975
smi35A	18922.6	-2.17848	0.735615	-2.96144	0.00306203	0.0249975
lobo	93.5219	-3.09188	1.04416	-2.96111	0.0030653	0.0250036
hipk	63671	-1.56683	0.529212	-2.96068	0.00306958	0.0250215
CG9914	140.864	3.02536	1.02238	2.95915	0.00308492	0.0251296
DNaseII	1258.79	2.03587	0.688162	2.95841	0.00309226	0.0251724
CG15043	487.45	4.2518	1.43884	2.95503	0.0031264	0.0254331
CG10433	11694.4	2.47266	0.836886	2.9546	0.00313076	0.0254515
Tg	604.349	4.90882	1.66179	2.95394	0.00313747	0.0254716
Cad99C	426.434	4.41951	1.49604	2.95414	0.00313541	0.0254716
CR43148	410.789	2.12431	0.719264	2.95345	0.00314245	0.0254949
Cyp4ad1	49.5516	-6.02575	2.04106	-2.95226	0.00315455	0.0255687
chas	981.545	4.03713	1.36753	2.95214	0.00315579	0.0255687
CG5577	737.776	2.89964	0.982307	2.95187	0.00315861	0.0255743
CG31462	2035.74	-2.40765	0.815836	-2.95115	0.00316594	0.0256165
Spt-I	11027.1	-1.45165	0.492118	-2.9498	0.00317984	0.0257117
CG2617	821.251	-1.85256	0.628145	-2.94925	0.00318546	0.0257296
5-HT7	2372.09	1.69436	0.574564	2.94896	0.00318846	0.0257296
CG15201	2341.28	1.84674	0.626194	2.94916	0.00318642	0.0257296
CG15745	1085.24	2.6715	0.907522	2.94373	0.00324279	0.0261456
CG14579	20.9714	-6.3658	2.1626	-2.94359	0.00324434	0.0261456
CG2107	477.893	3.86512	1.3148	2.93971	0.00328518	0.026457
CG43093	3676.81	9.57843	3.25952	2.9386	0.00329696	0.0265269
CG1468	182.255	2.23858	0.761817	2.93848	0.00329826	0.0265269
5-HT1B	2509.57	1.93027	0.657091	2.9376	0.00330766	0.0265847
CG34402	1177.96	2.7718	0.943877	2.93661	0.00331821	0.0266518
ClC-a	1187.35	1.94966	0.664015	2.93616	0.003323	0.0266725
ImpE1	250.854	2.35136	0.800894	2.93592	0.00332562	0.0266758
CG7768	214.422	4.77497	1.62726	2.93436	0.0033424	0.0267925
CG14109	95.613	8.71166	2.97247	2.93078	0.0033811	0.0270309
CG43330	17.6067	7.76468	2.64887	2.93132	0.00337523	0.0270309
mael	1522.37	-1.76563	0.602385	-2.93107	0.00337795	0.0270309
bi	11868.5	-1.51535	0.51702	-2.93093	0.00337953	0.0270309
CG14614	6161.79	-1.62013	0.553002	-2.92969	0.00339298	0.0271078
Hydr2	9795.75	-1.34629	0.459827	-2.92783	0.00341342	0.027252
IM4	11922.3	9.84616	3.36325	2.92757	0.00341622	0.027252
CG31296	25.6038	8.2998	2.83519	2.92743	0.0034178	0.027252
CG8314	4827.1	-1.39496	0.476577	-2.92703	0.00342214	0.0272685
TfIIA-L	8145.26	-1.39278	0.475907	-2.92659	0.00342703	0.0272894
CG6145	3864.84	1.80536	0.617319	2.92452	0.0034499	0.0274353
GstE11	733.798	3.20863	1.09714	2.92455	0.00344957	0.0274353
CG15356	2614.28	1.64441	0.562352	2.92417	0.00345381	0.0274483
CG2082	26240.2	2.10011	0.718646	2.92231	0.00347443	0.027594
E(spl)mdelta-HLH	49.0133	-3.44626	1.17937	-2.92211	0.00347672	0.027594
nod	101.37	2.32254	0.794918	2.92173	0.00348092	0.0276092
CG7888	2375.35	1.93023	0.660877	2.92071	0.00349239	0.027682
l(1)G0320	6378.16	-1.90366	0.652009	-2.91968	0.00350391	0.027755
wgn	781.254	3.18238	1.0901	2.91936	0.00350753	0.0277654
Irk2	4870.82	3.72956	1.27816	2.91792	0.0035237	0.0278751
par-6	3883.85	1.37712	0.471997	2.91763	0.00352697	0.0278828
CG15601	363.311	5.18185	1.77648	2.91691	0.00353514	0.027929
rad50	2922.82	-1.52279	0.522153	-2.91636	0.00354137	0.0279599
CG18446	60.2405	4.63001	1.58834	2.915	0.00355688	0.028064
Oamb	14796.5	-1.41925	0.487011	-2.91421	0.00356584	0.0281163
CG9673	55.1531	4.27157	1.46653	2.91271	0.00358312	0.028234
CG34137	458.835	-1.75392	0.602294	-2.91206	0.00359052	0.0282739
Acox57D-p	684.961	4.00711	1.37622	2.91168	0.0035949	0.0282899
AlkB	584.447	2.54932	0.875623	2.91143	0.00359775	0.0282939
CG10514	959.275	1.95879	0.672884	2.91104	0.00360233	0.0283114
CG7900	285.418	4.74401	1.62982	2.91076	0.00360551	0.0283172
CG15368	18.1925	7.80802	2.68265	2.91056	0.00360777	0.0283172
Meltrin	1873.49	1.68122	0.578322	2.90707	0.00364827	0.0286165
lab	63.5698	5.39495	1.85594	2.90686	0.00365073	0.0286172
G-ialpha65A	1154.68	3.49678	1.20311	2.90645	0.00365559	0.0286181
Mrp4	1158.53	3.96967	1.3658	2.90647	0.0036553	0.0286181
CG31760	27495.9	-1.74594	0.600993	-2.90509	0.00367145	0.0287235
su(Hw)	3008.81	-1.39958	0.481838	-2.90468	0.00367633	0.0287431
CR32160	38.1971	-5.24613	1.80716	-2.90297	0.00369637	0.0288811
CG32485	18790	-2.27005	0.782102	-2.9025	0.00370197	0.028906
CG12163	51569.1	-1.30292	0.44898	-2.90196	0.00370832	0.0289245
Syp	31995.9	1.45135	0.500139	2.90189	0.00370913	0.0289245
kek3	2833.94	2.60494	0.897799	2.90147	0.00371416	0.0289276
ventrally-expressed-protein-D	7684.4	-1.69654	0.58472	-2.90146	0.00371432	0.0289276
GstE8	246.688	4.291	1.47942	2.90046	0.00372613	0.0290008
CG13488	26.4682	5.92781	2.04476	2.89902	0.00374329	0.0291156
dsx	791.135	3.11958	1.07631	2.8984	0.00375076	0.0291427
CG17083	18.6437	7.84266	2.70593	2.89832	0.00375162	0.0291427
dpn	102.924	4.77777	1.64879	2.89775	0.00375849	0.0291747
CG8546	44.6262	5.09891	1.75971	2.89758	0.00376057	0.0291747
Cng	1624.47	-1.9968	0.689252	-2.89705	0.00376686	0.0291909
CG12605	22005.9	1.53937	0.531366	2.897	0.0037675	0.0291909
ninaD	297.399	5.18821	1.79122	2.89647	0.00377382	0.0292211
Ipk1	232.745	2.8988	1.00126	2.89514	0.00378985	0.0293263
laccase2	949.475	3.59159	1.2408	2.89458	0.00379663	0.0293599
CG12038	16948.5	-2.00574	0.693072	-2.89398	0.0038039	0.0293973
fax	103279	-1.40052	0.484149	-2.89275	0.0038189	0.0294754
CG4115	4079.11	9.93021	3.43265	2.89287	0.00381738	0.0294754
CG7322	1038.15	3.70448	1.28087	2.89215	0.00382615	0.0295125
Tie	3276.72	9.35054	3.23331	2.89195	0.00382865	0.0295129
Gyc32E	2792.67	-2.69211	0.93098	-2.89169	0.0038317	0.0295176
Ef1alpha100E	134005	-1.31258	0.454423	-2.88845	0.00387142	0.0298045
CG17333	780.539	2.70878	0.938352	2.88675	0.00389249	0.0299476
CG43129	538.197	-2.78312	0.964637	-2.88515	0.00391228	0.0300807
Efa6	6358.36	1.36255	0.472299	2.88493	0.00391504	0.0300827
CG13905	36.1948	-5.47862	1.89964	-2.88402	0.00392632	0.0301501
nub	317.792	4.16693	1.4453	2.88308	0.00393809	0.0302212
Sec61alpha	21128.1	-1.47813	0.512825	-2.88233	0.0039475	0.0302742
CG8547	2002.83	4.09061	1.41988	2.88095	0.00396479	0.0303875
CG3678	2335.66	-1.40021	0.486554	-2.8778	0.00400453	0.0306726
CG8180	161.407	3.40685	1.18395	2.87754	0.00400794	0.0306792
TbCMF46	25.6968	8.30513	2.88988	2.87386	0.00405483	0.0310185
fj	251.168	5.74305	2.00024	2.87119	0.00408932	0.0312228
comm3	638.787	4.94613	1.72259	2.87133	0.00408745	0.0312228
E(spl)malpha-BFM	374.502	12.1746	4.23992	2.87143	0.00408622	0.0312228
Gad1	57190.9	2.18212	0.760158	2.87062	0.00409674	0.0312399
CG3239	27.7118	-8.10028	2.82165	-2.87076	0.0040949	0.0312399
CG10041	156.577	-2.21547	0.772422	-2.86821	0.00412806	0.0314589
nAcRbeta-64B	55740.4	1.4049	0.489927	2.86756	0.00413648	0.0314967
Takr99D	1317.86	1.90371	0.663909	2.86743	0.00413825	0.0314967
Cpr49Ae	534.294	5.40441	1.88541	2.86645	0.0041511	0.0315746
CG32395	21.6486	6.61357	2.30814	2.86532	0.00416586	0.0316669
Cad74A	282.611	5.98465	2.08902	2.86482	0.00417245	0.0316779
Eip78C	3293.17	2.67317	0.933104	2.86481	0.00417257	0.0316779
CG13875	1048.88	-2.34525	0.818736	-2.86447	0.00417704	0.0316919
CecA1	192.42	-2.10045	0.733438	-2.86384	0.00418535	0.031735
CG4945	149.249	2.38744	0.83387	2.86308	0.00419544	0.0317915
ltl	972.059	3.79899	1.32704	2.86276	0.00419967	0.0318035
CG8736	629.216	4.07427	1.42338	2.86239	0.00420463	0.0318211
CG4705	1568.58	-1.47328	0.514794	-2.86188	0.00421137	0.0318406
CG14372	16923.9	-1.67123	0.58398	-2.8618	0.00421248	0.0318406
GlcAT-P	10321.9	1.34435	0.469816	2.86144	0.00421717	0.031856
CG43394	5039.47	3.87775	1.3553	2.86118	0.00422073	0.0318629
roX2	3524.3	2.2564	0.788709	2.86088	0.00422474	0.0318732
CG31705	58106.3	-2.21717	0.775217	-2.86007	0.00423551	0.0319345
fz2	4256.68	1.72349	0.60275	2.85937	0.00424482	0.0319647
CG14567	2739.21	9.28441	3.2468	2.85956	0.00424231	0.0319647
Tsp74F	2220.79	4.64529	1.62529	2.85813	0.00426149	0.0320572
park	5337.27	-1.76669	0.618145	-2.85806	0.00426242	0.0320572
CG32726	25.7055	6.86399	2.40271	2.85678	0.00427968	0.032167
Sesn	1660.77	2.80085	0.980631	2.85617	0.00428788	0.0322085
CG7402	380.016	12.1957	4.27055	2.85577	0.00429322	0.0322285
Nlg1	124.034	4.9158	1.72155	2.85545	0.00429758	0.0322412
pyd3	962.738	3.43548	1.20336	2.85491	0.00430484	0.0322756
CG6749	1028.49	-1.76081	0.616837	-2.85457	0.00430949	0.0322903
CG31549	2717	-1.47788	0.518284	-2.85148	0.00435156	0.0325854
CG4829	7392.93	-1.69702	0.595542	-2.84954	0.00437829	0.0327652
CG13924	266.587	-2.52068	0.884751	-2.84903	0.00438531	0.0327973
Dat	4828.72	1.96154	0.688832	2.84763	0.00440459	0.0329007
Orct	1389.47	2.30256	0.808553	2.84776	0.00440288	0.0329007
jim	46040.4	1.35201	0.475282	2.84465	0.00444596	0.0331891
CR44042	121.08	3.38561	1.19028	2.84438	0.00444985	0.0331977
nuf	4327.8	2.11752	0.744551	2.84402	0.00445486	0.0332145
CR44221	47.4417	3.3136	1.16679	2.83994	0.0045122	0.0336004
cngl	38471.8	2.20034	0.774773	2.83997	0.00451171	0.0336004
Sox102F	2677.32	2.85885	1.00685	2.83939	0.00451998	0.0336376
CG3831	768.944	1.58185	0.557191	2.83897	0.00452588	0.0336607
nol	97.5252	-2.65212	0.934468	-2.83811	0.00453812	0.0337102
CG2993	29133.9	1.6471	0.580335	2.83819	0.00453704	0.0337102
CG31793	4709.73	-1.60105	0.564434	-2.83656	0.0045602	0.033814
CG1516	14527.5	3.07947	1.08587	2.83595	0.00456893	0.033814
rols	2907.46	3.53011	1.24451	2.83655	0.0045604	0.033814
CG9231	12308.5	-1.67835	0.591695	-2.83651	0.00456098	0.033814
Act79B	781.318	3.54621	1.25032	2.83624	0.00456479	0.033814
CG5934	4804.78	-1.46518	0.516644	-2.83596	0.00456878	0.033814
jdp	41821.1	2.4946	0.879764	2.83553	0.00457496	0.0338379
CG14852	25.5246	8.29549	2.92578	2.8353	0.0045782	0.0338411
CG5707	418.169	5.14538	1.81548	2.83417	0.00459442	0.0339402
aos	354.949	5.44916	1.92289	2.83384	0.00459929	0.0339553
CG9634	1472.52	3.11552	1.09962	2.83326	0.00460757	0.0339956
CG10559	132.463	5.81751	2.05397	2.83232	0.00462113	0.0340748
Tsf3	456.954	3.19355	1.12773	2.83185	0.00462802	0.0341048
CG31921	265.691	3.41303	1.20537	2.83151	0.00463283	0.0341078
CG30270	19.0158	7.87037	2.77965	2.83143	0.00463409	0.0341078
CG8436	1091.89	1.77205	0.625917	2.83112	0.00463849	0.0341193
Spase22-23	9965.6	-1.61273	0.570077	-2.82898	0.00466969	0.0343279
Incenp	135.615	-2.09083	0.739186	-2.82855	0.00467588	0.0343525
CR43264	389.989	-2.8137	0.994948	-2.82799	0.00468416	0.0343923
ken	1226.75	3.74162	1.3241	2.82579	0.00471644	0.0346083
CG9512	574.45	2.80931	0.994896	2.82373	0.00474688	0.0348105
His4r	82111.2	-1.29565	0.458991	-2.82282	0.00476032	0.0348878
sas	2425.09	5.40415	1.91541	2.82141	0.0047813	0.0350012
regucalcin	6278.94	2.4605	0.872088	2.82139	0.0047816	0.0350012
Ect4	2416.33	2.27915	0.807931	2.82097	0.00478789	0.0350047
pnr	198.36	4.88714	1.73233	2.82114	0.00478528	0.0350047
Cyp6a13	753.075	2.54314	0.901687	2.82043	0.00479595	0.0350424
CG11221	8409.94	-2.00374	0.711013	-2.81814	0.00483026	0.0352717
CG11236	17.3317	7.73756	2.7464	2.81734	0.00484227	0.035338
CG16965	243.325	4.88903	1.73629	2.81579	0.00486572	0.0354265
CG16838	126.398	2.61194	0.927584	2.81585	0.00486483	0.0354265
CG1847	8042.07	-1.54431	0.548386	-2.8161	0.00486107	0.0354265
CG43156	23.2449	8.16016	2.89803	2.81576	0.00486614	0.0354265
Syb	3058.89	2.31414	0.821976	2.81533	0.00487265	0.0354524
CG31205	7249.85	10.6904	3.79849	2.81439	0.00488705	0.0355358
CG15450	32.7205	5.65223	2.00909	2.81333	0.00490306	0.0356307
Sod3	2530.51	2.37423	0.844484	2.81146	0.0049317	0.0358172
Dhc62B	75.6935	-2.74933	0.978741	-2.80905	0.00496885	0.0360436
CG15534	172.265	2.701	0.961475	2.80922	0.00496617	0.0360436
Cyp6a2	664.909	2.14926	0.765531	2.80754	0.00499209	0.0361904
Gdi	82774.5	-1.44575	0.514994	-2.80731	0.00499565	0.0361944
CG13837	44.7854	3.98724	1.4212	2.80554	0.00502325	0.0363725
E(spl)m2-BFM	572.027	12.7858	4.56243	2.8024	0.00507241	0.0367065
Cyp6a9	253.801	4.31446	1.54015	2.80132	0.00508937	0.0368071
pgant2	6335.15	1.31215	0.468598	2.80016	0.00510769	0.0368953
CG14891	23.9711	-7.8919	2.8183	-2.80023	0.0051066	0.0368953
CG17821	18.1874	6.36377	2.27289	2.79986	0.00511248	0.036897
CG15728	47.2452	4.95707	1.77053	2.79976	0.00511404	0.036897
Pepck	1973.38	4.47533	1.59968	2.79764	0.00514776	0.0371181
CG42351	307.781	2.07261	0.740935	2.79729	0.00515336	0.0371288
Or59b	16.0433	7.63069	2.72801	2.79716	0.00515541	0.0371288
Reck	1465.43	-1.55537	0.556341	-2.79571	0.00517851	0.0372729
CheB53a	68.6407	-3.84527	1.37576	-2.79502	0.00518957	0.0373302
CG43729	67345.8	-1.84893	0.66166	-2.79438	0.00519999	0.0373829
por	1555.57	-1.38443	0.495895	-2.79179	0.00524181	0.037661
CG10657	514.611	3.21417	1.15159	2.79108	0.00525332	0.0377213
Sema-5c	1037.53	4.2897	1.53733	2.79036	0.00526494	0.0377822
MFS18	10850.7	-1.36257	0.488459	-2.78953	0.00527848	0.0378535
spz5	222.509	4.50265	1.61467	2.7886	0.00529372	0.0378535
CG6310	1351.38	-1.55723	0.55837	-2.78889	0.00528891	0.0378535
PGRP-LB	532.795	3.64353	1.30654	2.78868	0.00529227	0.0378535
CG2010	172.111	2.47271	0.886521	2.78923	0.00528336	0.0378535
Cyp28c1	199.094	2.53387	0.908592	2.78879	0.00529057	0.0378535
rgr	1801.33	2.95706	1.06127	2.78634	0.00533072	0.0380955
DOR	11682.5	1.92523	0.691123	2.78566	0.00534196	0.0381532
Cpr49Ag	26.3526	6.85886	2.46355	2.78414	0.00536697	0.0383092
CG8097	1768.25	-1.73165	0.622071	-2.78369	0.00537438	0.0383394
CG6232	550.99	1.55805	0.559851	2.78297	0.00538632	0.0384018
koko	1934.44	-1.34514	0.483393	-2.7827	0.0053908	0.038411
CR43909	35.2813	4.29529	1.54437	2.78126	0.00541485	0.0385369
Mmp1	3831.43	2.99419	1.0765	2.78142	0.00541217	0.0385369
Ets65A	2091.21	2.84002	1.02132	2.78073	0.00542371	0.0385771
cana	647.314	3.60067	1.29504	2.78036	0.00542984	0.038598
spaw	26.7895	5.36255	1.9295	2.77924	0.00544856	0.0387082
Pdi	48166.3	-1.33923	0.482152	-2.77762	0.00547587	0.0388793
CG31068	207.175	-3.2104	1.15616	-2.77677	0.00549014	0.0389577
Uch	6526.58	-1.58254	0.570247	-2.77519	0.00551702	0.0390911
CG13743	7773.72	2.86486	1.03242	2.7749	0.00552191	0.0390911
CG13038	239.166	5.96551	2.1498	2.77492	0.00552155	0.0390911
E(spl)m7-HLH	20.2574	6.5168	2.34801	2.77546	0.00551242	0.0390911
CG13631	2119.33	2.68851	0.969198	2.77395	0.00553798	0.0391819
CG3409	9452.18	-1.50138	0.541491	-2.77268	0.00555972	0.0393126
beat-IV	22178.3	-1.60147	0.577637	-2.77245	0.0055636	0.039317
CG11029	14965.7	9.54321	3.44267	2.77203	0.00557072	0.0393397
CG13995	12664.1	-1.66686	0.601364	-2.7718	0.00557479	0.0393397
CR43314	188.591	4.37896	1.57989	2.77169	0.00557661	0.0393397
CG6435	796.21	3.51392	1.26804	2.77114	0.0055861	0.0393606
CG3857	275.958	1.70972	0.616974	2.77114	0.00558597	0.0393606
CG15822	152.852	5.47876	1.97734	2.77077	0.00559238	0.0393819
CG4582	144.193	-2.74792	0.99221	-2.7695	0.00561432	0.0394902
CG9689	246.468	3.18479	1.14991	2.76959	0.0056127	0.0394902
br	5398.45	1.54751	0.558811	2.76929	0.00561794	0.0394927
CG42795	38962.9	-1.63797	0.591607	-2.76867	0.00562853	0.039544
Sas	60.9454	2.86797	1.03619	2.76779	0.00564379	0.0396282
CG31075	7016.02	-1.67577	0.605517	-2.7675	0.00564875	0.0396399
CG34326	128.91	2.88635	1.0433	2.76656	0.00566516	0.0397319
CG5780	520.371	-2.12734	0.769237	-2.76551	0.00568332	0.0397938
CG30339	94.4753	-2.44581	0.884433	-2.7654	0.00568534	0.0397938
Nrx-IV	14651.6	-1.41106	0.510274	-2.76529	0.00568718	0.0397938
pdgy	9781.29	3.4356	1.2423	2.76551	0.00568339	0.0397938
Pkc53E	16889.1	1.65211	0.597605	2.76456	0.00570005	0.0398318
Ugt86Dj	21.9328	8.0762	2.92149	2.76441	0.00570254	0.0398318
CG12708	184.313	-3.08843	1.11713	-2.76461	0.00569915	0.0398318
betaTub56D	111419	-1.63498	0.591886	-2.76233	0.00573908	0.0400407
CR43794	18.2341	7.80966	2.82712	2.76241	0.00573767	0.0400407
GstD9	1475.55	2.45712	0.890305	2.75986	0.00578256	0.0403208
CG30099	400.006	2.26716	0.821654	2.75927	0.00579313	0.0403711
Ahcy89E	1004.77	5.47276	1.98529	2.75666	0.00583955	0.0406711
CG43095	101.293	5.05381	1.83354	2.75632	0.00584559	0.0406896
2018-09-01	6426.68	-1.39179	0.505051	-2.75574	0.00585591	0.0407379
CG17298	28.0595	-6.7994	2.46774	-2.75532	0.00586355	0.0407676
CG14608	43.8464	4.62317	1.67852	2.75431	0.00588152	0.040869
CR44111	26.7143	5.35403	1.94508	2.7526	0.00591233	0.0410594
CG17122	206.834	-1.89451	0.68833	-2.75233	0.00591724	0.0410698
nompB	170.241	3.71888	1.35139	2.7519	0.00592498	0.0410999
CG17005	39.0898	3.23814	1.17724	2.75062	0.00594833	0.0412381
E(spl)m3-HLH	179.877	3.2893	1.1962	2.7498	0.00596314	0.041317
Duox	1013.07	3.71772	1.3522	2.74938	0.0059708	0.0413463
CG17193	2469.76	1.84739	0.672404	2.74744	0.0060063	0.0415683
Lip4	67.5406	4.05738	1.4771	2.74685	0.00601707	0.0416189
CG13897	546.947	3.62937	1.32201	2.74534	0.0060449	0.0417874
CG13506	18583	-1.75441	0.639227	-2.74459	0.00605872	0.041859
CG11406	144.86	2.08868	0.761263	2.74371	0.00607489	0.0419466
CG10650	1207.54	3.25397	1.18632	2.74292	0.00608959	0.0420204
gp210	4148.7	-1.74729	0.637057	-2.74276	0.00609254	0.0420204
CG31871	44.6019	5.33693	1.94634	2.74203	0.00610606	0.0420895
CG13059	885.638	5.04101	1.83875	2.74155	0.00611509	0.0421277
Klp54D	756.257	-1.47918	0.539691	-2.7408	0.00612903	0.0421755
CG32111	295.929	3.18384	1.1616	2.7409	0.00612704	0.0421755
CG12201	425.643	-1.8509	0.675465	-2.74019	0.00614038	0.0422296
Pax	1982.1	1.57104	0.573716	2.73836	0.00617463	0.0424409
Pka-R1	49756.2	-1.61224	0.588838	-2.738	0.00618149	0.0424638
e(y)2b	103.462	3.69822	1.3508	2.7378	0.0061851	0.0424644
CG13409	11245	-1.39342	0.509358	-2.73564	0.00622584	0.0427198
trol	7479.87	3.08861	1.1292	2.73523	0.00623363	0.042749
CG32026	78.2277	3.07886	1.12585	2.73471	0.00624351	0.0427924
CG7589	824.148	3.70092	1.35415	2.73301	0.0062758	0.0429892
bora	104.386	-3.87325	1.41741	-2.73263	0.00628313	0.043015
CG40160	1307.42	2.71859	0.995299	2.73143	0.00630597	0.0431323
CR44017	540.768	2.33478	0.854804	2.73136	0.00630742	0.0431323
CG7824	1050.99	-1.58713	0.581327	-2.73019	0.00632971	0.0432428
CG2893	1691.17	2.37047	0.868261	2.73014	0.00633075	0.0432428
CG9640	623.829	1.92238	0.704257	2.72966	0.00634006	0.043279
CG11099	4949.41	2.33489	0.855607	2.72893	0.00635401	0.043279
lox2	35.2054	6.35116	2.32729	2.72899	0.00635283	0.043279
Osi7	220.51	6.90092	2.52832	2.72945	0.0063441	0.043279
CG3822	6999.85	-1.32338	0.4849	-2.72918	0.00634928	0.043279
GstD5	18.1192	7.81059	2.86411	2.72706	0.00639021	0.0435011
CG16734	831.48	-1.77039	0.64932	-2.72653	0.00640048	0.0435464
CG3036	3141.57	3.63206	1.33243	2.72588	0.00641301	0.043607
Obp19d	10664.4	9.35357	3.43188	2.72549	0.00642053	0.0436336
scrib	9466.48	1.69111	0.620613	2.7249	0.00643203	0.0436871
CG1732	10239.6	2.79529	1.02594	2.72462	0.00643761	0.0437003
CG1213	2364.94	1.92258	0.705845	2.7238	0.00645357	0.0437823
Mlc2	1977.53	3.67881	1.3507	2.72363	0.00645695	0.0437823
hdc	12329.8	1.8306	0.672434	2.72235	0.00648187	0.0439266
CG14803	1533.8	-1.70181	0.625188	-2.72208	0.00648722	0.0439382
tsh	272.122	1.96637	0.722555	2.72141	0.00650037	0.0440025
CG8086	1212.97	3.28438	1.20871	2.71727	0.00658231	0.0445322
Rh5	182.613	2.42142	0.891317	2.71668	0.00659412	0.0445647
Arc1	31834.9	-1.47084	0.541414	-2.71666	0.00659452	0.0445647
SoxN	3800.89	2.66012	0.979351	2.71621	0.00660341	0.0445999
CG5389	55.1023	-3.67331	1.35262	-2.7157	0.0066136	0.0446437
CG30022	2778.97	-1.51098	0.556467	-2.71532	0.00662127	0.0446704
CG32755	464.642	1.67517	0.617143	2.71439	0.0066397	0.0447697
PRL-1	50330.2	-2.07486	0.76454	-2.71387	0.0066502	0.0448154
GLaz	1715.36	4.55884	1.68125	2.71159	0.0066962	0.0450339
CG17029	1889.71	2.1793	0.80372	2.71152	0.00669756	0.0450339
scro	4040.23	2.36219	0.871052	2.71188	0.0066903	0.0450339
Ast	4331.74	2.36002	0.870287	2.71177	0.00669246	0.0450339
CG7079	739.128	2.99233	1.10402	2.71039	0.00672033	0.0451618
CG6553	658.566	4.51584	1.66655	2.7097	0.00673448	0.0452317
Sfp24Ba	20.6208	7.98706	2.94779	2.70951	0.00673835	0.0452325
pen-2	2337.2	-1.62016	0.598198	-2.7084	0.00676075	0.0453576
CG5525	9710.17	-1.28491	0.474604	-2.70733	0.00678259	0.0454283
CG2135	2895.31	-1.41226	0.521602	-2.70754	0.00677836	0.0454283
su(r)	156.823	2.35914	0.871342	2.70748	0.00677967	0.0454283
Bem46	1127.5	-1.56906	0.579731	-2.70653	0.00679911	0.0454884
Sans	86.3458	5.05611	1.86801	2.70669	0.00679585	0.0454884
CG5888	1011.26	2.48359	0.918977	2.70256	0.00688075	0.046009
Pal2	169698	-1.99517	0.738977	-2.69991	0.00693578	0.0463513
CG11999	2831.87	-1.4646	0.542632	-2.69906	0.00695361	0.0464447
wb	928.754	3.57739	1.32567	2.69856	0.00696402	0.0464885
CG13305	14.9312	7.52586	2.78939	2.69803	0.00697512	0.0465368
CG5644	957.504	2.28098	0.845677	2.69723	0.00699198	0.0465977
CG8927	164.875	3.62419	1.34367	2.69724	0.00699177	0.0465977
fng	915.751	2.57166	0.953766	2.69632	0.00701093	0.0466982
CG9752	393.917	-1.7799	0.660379	-2.69528	0.00703305	0.0467839
CG1890	2335.67	-1.401	0.519821	-2.69516	0.00703543	0.0467839
CG1749	3110.43	-1.36812	0.507584	-2.69536	0.0070313	0.0467839
Nrt	4787.86	-1.56047	0.579386	-2.69331	0.00707456	0.0470182
CG4788	1435.45	-1.5298	0.568048	-2.69309	0.0070794	0.0470244
NtR	3116.09	3.91771	1.45514	2.69232	0.00709558	0.0471059
CG15256	17.1406	-6.07539	2.25725	-2.6915	0.00711308	0.0471961
CG42711	257.302	4.7539	1.76708	2.69026	0.00713969	0.0473363
fog	656.085	2.76308	1.02711	2.69015	0.00714206	0.0473363
ver	687.742	-1.51047	0.561638	-2.68941	0.00715784	0.0474148
CG42624	184.469	-3.527	1.31162	-2.68905	0.00716559	0.0474401
Gclm	2959.4	1.58949	0.591153	2.68879	0.00717106	0.0474502
CG13813	54.4663	-4.43798	1.65096	-2.68813	0.00718541	0.0475191
CG15406	72.9894	5.21455	1.94009	2.68778	0.00719282	0.047542
CG18557	57.8277	5.05879	1.88282	2.68682	0.00721362	0.0476534
CG3505	748.655	5.09415	1.89631	2.68635	0.00722377	0.0476943
CG8455	3409.36	-1.36536	0.508308	-2.68609	0.00722939	0.0477052
lush	181.826	5.49631	2.04795	2.68381	0.00727875	0.0480047
Pkg21D	24.0735	5.80217	2.16241	2.6832	0.00729224	0.0480411
Xrp1	79018.4	-1.83542	0.68403	-2.68324	0.00729122	0.0480411
CG10463	277.186	1.69921	0.633335	2.68295	0.0072976	0.0480502
CG9541	141.961	3.22198	1.20151	2.68162	0.00732677	0.0482159
CG9164	11252.1	-1.2574	0.468945	-2.68134	0.00733285	0.0482296
pdm3	4195.28	2.34091	0.873318	2.68048	0.00735176	0.0483012
AR-2	876.738	-1.59948	0.596683	-2.68061	0.00734876	0.0483012
dar1	157.298	3.88797	1.45097	2.67957	0.00737169	0.0484058
CG6652	44.7621	3.23498	1.20783	2.67835	0.00739863	0.0485563
Lgr1	2028.38	2.02648	0.756879	2.67741	0.00741938	0.048666
snoRNA:gcl-a	18.997	-4.57551	1.70949	-2.67653	0.00743884	0.0487671
Mio	13756.4	-1.51769	0.567467	-2.67449	0.0074843	0.0489586
Hil	694.225	3.5811	1.33889	2.67468	0.00748013	0.0489586
CG14185	114.979	-2.67239	0.999182	-2.67458	0.00748226	0.0489586
CG1458	7979.82	1.44014	0.53839	2.6749	0.00747519	0.0489586
Optix	1353.28	3.07061	1.14833	2.67398	0.00749565	0.0490063
CG11362	592.131	1.8428	0.689524	2.67257	0.00752735	0.0491868
htl	354.049	1.63586	0.613159	2.66792	0.00763229	0.0498455
