# Supplementary material for: Striking circadian neuron diversity and cycling of Drosophila alternative splicing
Source: eLife journal article supplement (doi:10.7554/elife.35618), 2018-06-04
Supplement: supp [file elife-35618-supp-v1.zip › elife_poa_e35618_Figure_6_source_data_1.xlsx]

## Sheet: LNd
cycling ID	junction ID	gene	locataion of longest junction	junction ID	F24 score	phase	p-value F24	JTK p-valuse	JTK phase	>10 reads	F24 10 cycle	JTK 10 cycle	mRNA cycles	amplitude (if min is 0 amplitude is Max *10)	reads 2	reads 6	reads 10	reads 14	reads 18	reads 22	reads 26	reads 30	reads 34	reads 38	reads 42	reads 46	2 percentage usage	6 percentage usage	10 percentage usage	14 percentage usage	18 percentage usage	22 percentage usage	2 percentage usage	6 percentage usage	10 percentage usage	14 percentage usage	18 percentage usage	22 percentage usage
LNd_11	3_Junction_10157_Junction_10158_Junction_10159	Pka-R1	chr3L:20812569-20825944	3_Junction_10157_Junction_10158_Junction_10159:001	0.390205	7.72934	0.1135	1	20.5333	reads okay	FALSE	FALSE	#N/A	6.667	27	14	6	0	0	0	0	3	11	7	2	1	0.6279	0.6667	0.4286	INF	INF	0	0	0.1364	0.6471	0.3889	0.1538	0.1429
LNd_12	3_Junction_10157_Junction_10158_Junction_10159	Pka-R1	chr3L:20812569-20825944	3_Junction_10157_Junction_10158_Junction_10159:002	0.382627	6.74433	0.1146	0.425517	24	reads okay	FALSE	FALSE	#N/A	10	6	5	8	0	0	0	5	17	6	11	0	0	0.1395	0.2381	0.5714	INF	INF	0	1	0.7727	0.3529	0.6111	0	0
LNd_13	3_Junction_10157_Junction_10158_Junction_10159	Pka-R1	chr3L:20812569-20825944	3_Junction_10157_Junction_10158_Junction_10159:003	0.530544	21.3913	0.0358	0.23276	22	reads okay	CYCLE	FALSE	#N/A	10	10	2	0	0	0	13	0	2	0	0	11	6	0.2326	0.0952	0	INF	INF	1	0	0.0909	0	0	0.8462	0.8571
LNd_175	3_Junction_11578_Junction_11579	dikar	chr3L:6730772-6731802	3_Junction_11578_Junction_11579:002	0.256247	7.28786	0.2501	0.0389891	20	reads okay	FALSE	CYCLE	#N/A	10	0	6	1	0	0	8	2	6	12	4	0	5	INF	1	1	0	INF	0.3077	0.1053	0.3529	0.6316	0.2353	INF	0.8333
LNd_179	3_Junction_115_Junction_117	Pten	chr2L:10256506-10257393	3_Junction_115_Junction_117:001	0.714444	8.88132	0.0042	0.0161336	24	reads okay	CYCLE	CYCLE	#N/A	10	0	13	12	15	0	0	7	16	15	6	5	5	0	1	0.6	0.5172	0	INF	0.3182	0.6154	0.7143	0.4	0.2941	0.2
LNd_180	3_Junction_115_Junction_117	Pten	chr2L:10256506-10257393	3_Junction_115_Junction_117:002	0.208549	19.9862	0.3402	0.182464	20	reads okay	FALSE	FALSE	#N/A	10	6	0	8	14	17	0	15	10	6	9	12	20	1	0	0.4	0.4828	1	INF	0.6818	0.3846	0.2857	0.6	0.7059	0.8
LNd_336	3_Junction_12057_Junction_12058	Tsp66E	chr3L:8905845-8906067	3_Junction_12057_Junction_12058:001	0.299319	6.43889	0.2028	0.523397	20	reads okay	FALSE	FALSE	mRNA cycles	10	12	15	4	1	0	0	0	19	20	20	4	21	0.375	1	0.4	0.0714	0	INF	INF	0.76	0.5128	0.4348	0.2	0.84
LNd_337	3_Junction_12057_Junction_12058	Tsp66E	chr3L:8905845-8906067	3_Junction_12057_Junction_12058:002	0.544591	14.9696	0.0416	0.23276	20	reads okay	CYCLE	FALSE	mRNA cycles	10	20	0	6	13	14	0	0	6	19	26	16	4	0.625	0	0.6	0.9286	1	INF	INF	0.24	0.4872	0.5652	0.8	0.16
LNd_501	3_Junction_13100_Junction_13102_Junction_13103	Fas1	chr3R:12458490-12461266	3_Junction_13100_Junction_13102_Junction_13103:003	0.223171	10.0807	0.3258	0.000649351	16	reads okay	FALSE	CYCLE	#N/A	3.8506	38	24	52	4	20	99	17	93	140	41	33	76	0.7037	0.7273	0.963	1	0.2597	0.8684	0.3778	0.8611	0.8861	0.8913	0.541	0.8736
LNd_647	3_Junction_15299_Junction_15300	slo	chr3R:20488244-20490084	3_Junction_15299_Junction_15300:001	0.823904	9.11773	0.001	0.00530303	24	reads okay	CYCLE	CYCLE	#N/A	10	7	4	11	8	0	0	2	7	11	3	1	0	0.3333	0.5714	1	1	0	0	0.4	0.875	0.9167	0.3333	0.0556	0
LNd_648	3_Junction_15299_Junction_15300	slo	chr3R:20488244-20490084	3_Junction_15299_Junction_15300:002	0.204908	22.4874	0.3419	1	20.5333	reads okay	FALSE	FALSE	#N/A	10	14	3	0	0	0	0	3	1	1	6	17	5	0.6667	0.4286	0	0	INF	INF	0.6	0.125	0.0833	0.6667	0.9444	1
LNd_803	3_Junction_16496_Junction_16498	Fer2LCH	chr3R:26215050-26215417	3_Junction_16496_Junction_16498:001	0.524727	0.268996	0.0425	0.354287	24	reads okay	CYCLE	FALSE	#N/A	1.47739	191	106	102	24	135	165	382	112	169	57	83	190	0.9052	0.9298	0.6456	0.75	0.906	0.9538	0.9455	0.7467	0.7934	0.7808	0.6803	0.8962
LNd_804	3_Junction_16496_Junction_16498	Fer2LCH	chr3R:26215050-26215417	3_Junction_16496_Junction_16498:002	0.524727	12.269	0.0425	0.354287	24	reads okay	CYCLE	FALSE	#N/A	7.671	20	8	56	8	14	8	22	38	44	16	39	22	0.0948	0.0702	0.3544	0.25	0.094	0.0462	0.0545	0.2533	0.2066	0.2192	0.3197	0.1038
LNd_863	3_Junction_17429_Junction_17430	CG8481	chr3R:5593862-5594643	3_Junction_17429_Junction_17430:001	0.0994125	10.6424	0.6026	1	20.5333	reads okay	FALSE	FALSE	#N/A	10	0	4	28	0	0	7	1	24	26	14	8	9	0	0.6667	1	INF	INF	1	0.2	0.8	0.8667	0.875	1	0.375
LNd_864	3_Junction_17429_Junction_17430	CG8481	chr3R:5593862-5594643	3_Junction_17429_Junction_17430:002	0.589654	2.0629	0.014	0.182464	24	reads okay	CYCLE	FALSE	#N/A	10	11	2	0	0	0	0	4	6	4	2	0	15	1	0.3333	0	INF	INF	0	0.8	0.2	0.1333	0.125	0	0.625
LNd_1041	3_Junction_18869_Junction_18870	gw	chr4:673459-673525	3_Junction_18869_Junction_18870:001	0.536218	0.249101	0.0235	0.113556	22	reads okay	CYCLE	FALSE	#N/A	7.586	17	21	4	0	38	66	27	26	31	26	17	27	0.4595	0.5676	0.08	0	0.3519	0.7586	0.4655	0.26	0.337	0.3023	0.3269	0.4219
LNd_1042	3_Junction_18869_Junction_18870	gw	chr4:673459-673525	3_Junction_18869_Junction_18870:002	0.536218	12.2491	0.0235	0.113556	22	reads okay	CYCLE	FALSE	#N/A	4.1425	20	16	46	5	70	21	31	74	61	60	35	37	0.5405	0.4324	0.92	1	0.6481	0.2414	0.5345	0.74	0.663	0.6977	0.6731	0.5781
LNd_1443	3_Junction_20947_Junction_20948	Arp2	chrX:16444498-16446371	3_Junction_20947_Junction_20948:001	0.00753373	17.8736	0.9657	1	20.5333	reads okay	FALSE	FALSE	#N/A	10	0	11	2	0	0	0	23	2	14	18	3	28	0	0.5789	0.25	INF	INF	INF	0.6053	0.1538	0.4667	0.5806	1	0.6829
LNd_1444	3_Junction_20947_Junction_20948	Arp2	chrX:16444498-16446371	3_Junction_20947_Junction_20948:002	0.62026	5.98655	0.019	0.113556	24	reads okay	CYCLE	FALSE	#N/A	10	11	8	6	0	0	0	15	11	16	13	0	13	1	0.4211	0.75	INF	INF	INF	0.3947	0.8462	0.5333	0.4194	0	0.3171
LNd_1564	3_Junction_21821_Junction_21822	Ntf-2	chrX:20907664-20909771	3_Junction_21821_Junction_21822:001	0.622049	2.02863	0.0109	0.0109748	24	reads okay	CYCLE	CYCLE	#N/A	2.69251	8	42	31	11	13	29	109	43	64	36	34	85	1	0.7636	0.5741	0.44	0.3714	0.8286	0.9646	0.7288	0.7529	0.6923	0.7234	0.8854
LNd_1565	3_Junction_21821_Junction_21822	Ntf-2	chrX:20907664-20909771	3_Junction_21821_Junction_21822:002	0.622049	14.0286	0.0109	0.0109748	24	reads okay	CYCLE	CYCLE	#N/A	6.286	0	13	23	14	22	6	4	16	21	16	13	11	0	0.2364	0.4259	0.56	0.6286	0.1714	0.0354	0.2712	0.2471	0.3077	0.2766	0.1146
LNd_2296	3_Junction_23471_Junction_23472	Ca-alpha1T	chrX:6012316-6017420	3_Junction_23471_Junction_23472:001	0.454732	5.6635	0.0574	0.283057	24	FALSE	FALSE	FALSE	#N/A	10	0	3	12	0	0	0	3	4	4	2	0	1	INF	1	0.4138	0	0	0	0.75	0.3333	0.2667	0.2222	0	0.3333
LNd_2297	3_Junction_23471_Junction_23472	Ca-alpha1T	chrX:6012316-6017420	3_Junction_23471_Junction_23472:002	0.679266	16.384	0.0063	0.0301407	24	reads okay	CYCLE	CYCLE	#N/A	10	0	0	17	7	63	1	1	8	11	7	3	2	INF	0	0.5862	1	1	1	0.25	0.6667	0.7333	0.7778	1	0.6667
LNd_2539	3_Junction_3342_Junction_3344	Bsg	chr2L:8089736-8105690	3_Junction_3342_Junction_3344:001	0.504924	22.1957	0.0283	0.425517	24	reads okay	CYCLE	FALSE	mRNA cycles	1.77148	54	31	35	55	3	13	33	35	45	35	40	47	0.9474	0.9688	0.5645	1	1	1	1	0.8537	0.7143	0.814	0.9091	0.9592
LNd_2540	3_Junction_3342_Junction_3344	Bsg	chr2L:8089736-8105690	3_Junction_3342_Junction_3344:002	0.504924	10.1957	0.0283	0.425517	24	reads okay	CYCLE	FALSE	mRNA cycles	4.355	3	1	27	0	0	0	0	6	18	8	4	2	0.0526	0.0312	0.4355	0	0	0	0	0.1463	0.2857	0.186	0.0909	0.0408
LNd_2545	3_Junction_3429_Junction_3430	Scgalpha	chr2L:8304577-8304842	3_Junction_3429_Junction_3430:001	0.597795	17.9101	0.0155	0.113556	24	reads okay	CYCLE	FALSE	#N/A	10	0	0	11	13	8	32	6	21	18	15	18	5	INF	0	0.3929	0.7647	1	1	0.5	0.5122	0.4865	0.625	0.6667	0.7143
LNd_2546	3_Junction_3429_Junction_3430	Scgalpha	chr2L:8304577-8304842	3_Junction_3429_Junction_3430:002	0.526202	7.89029	0.03	0.14801	24	reads okay	CYCLE	FALSE	#N/A	10	0	5	17	4	0	0	6	20	19	9	9	2	INF	1	0.6071	0.2353	0	0	0.5	0.4878	0.5135	0.375	0.3333	0.2857
LNd_2693	3_Junction_5029_Junction_5030	cora	chr2R:15124568-15125655	3_Junction_5029_Junction_5030:001	0.551988	19.0567	0.022	0.113556	24	reads okay	CYCLE	FALSE	#N/A	10	16	0	0	1	7	21	16	3	20	5	9	11	0.8421	0	0	1	1	1	0.8421	0.25	0.9524	0.8333	1	0.8462
LNd_2694	3_Junction_5029_Junction_5030	cora	chr2R:15124568-15125655	3_Junction_5029_Junction_5030:002	0.551988	7.05672	0.0221	0.113556	24	FALSE	FALSE	FALSE	#N/A	10	3	8	1	0	0	0	3	9	1	1	0	2	0.1579	1	1	0	0	0	0.1579	0.75	0.0476	0.1667	0	0.1538
LNd_2729	3_Junction_5815_Junction_5817	l(2)tid	chr2R:19595997-19596151	3_Junction_5815_Junction_5817:001	0.564837	15.576	0.0269	0.0389891	20	reads okay	CYCLE	CYCLE	#N/A	10	4	0	4	8	14	0	13	10	11	12	17	5	0.3333	0	0.3077	1	1	INF	0.3023	0.3448	0.3793	0.5714	0.85	0.1667
LNd_2730	3_Junction_5815_Junction_5817	l(2)tid	chr2R:19595997-19596151	3_Junction_5815_Junction_5817:002	0.612169	5.32532	0.0227	0.354287	24	reads okay	CYCLE	FALSE	#N/A	10	8	5	9	0	0	0	30	19	18	9	3	25	0.6667	1	0.6923	0	0	INF	0.6977	0.6552	0.6207	0.4286	0.15	0.8333
LNd_2731	3_Junction_5816_Junction_5818	l(2)tid	chr2R:19595997-19596156	3_Junction_5816_Junction_5818:001	0.596378	13.4503	0.0219	0.113556	24	reads okay	CYCLE	FALSE	#N/A	10	0	0	9	6	11	0	0	5	10	3	0	15	0	INF	0.75	1	0.4783	INF	INF	0.2381	0.4762	1	INF	0.5769
LNd_2732	3_Junction_5816_Junction_5818	l(2)tid	chr2R:19595997-19596156	3_Junction_5816_Junction_5818:002	0.141572	3.89618	0.4953	1	20.5333	reads okay	FALSE	FALSE	#N/A	10	4	0	3	0	12	0	0	16	11	0	0	11	1	INF	0.25	0	0.5217	INF	INF	0.7619	0.5238	0	INF	0.4231
LNd_2947	3_Junction_7839_Junction_7840	Sin3A	chr2R:8464498-8466632	3_Junction_7839_Junction_7840:001	0.567764	5.13025	0.0322	0.354287	24	reads okay	CYCLE	FALSE	#N/A	8.571	28	7	6	0	0	0	7	18	17	0	2	5	0.4516	0.2	0.2857	0	0	0	0.7	0.8571	0.7391	0	0.0417	0.3846
LNd_2948	3_Junction_7839_Junction_7840	Sin3A	chr2R:8464498-8466632	3_Junction_7839_Junction_7840:002	0.567764	17.1302	0.0322	0.354287	24	reads okay	CYCLE	FALSE	#N/A	6.9979	34	28	15	59	49	52	3	3	6	31	46	8	0.5484	0.8	0.7143	1	1	1	0.3	0.1429	0.2609	1	0.9583	0.6154
LNd_2953	3_Junction_7983_Junction_7984	CG42321	chr2R:9303462-9306490	3_Junction_7983_Junction_7984:001	0.575058	22.9536	0.0248	0.23276	22	reads okay	CYCLE	FALSE	#N/A	3.14268	21	11	20	7	48	18	26	20	17	29	16	30	0.84	0.4583	0.5	0.3182	0.8	1	0.7647	0.4444	0.4359	0.4754	0.5517	0.5357
LNd_2954	3_Junction_7983_Junction_7984	CG42321	chr2R:9303462-9306490	3_Junction_7983_Junction_7984:002	0.575058	10.9536	0.0248	0.23276	22	reads okay	CYCLE	FALSE	#N/A	6.818	4	13	20	15	12	0	8	25	22	32	13	26	0.16	0.5417	0.5	0.6818	0.2	0	0.2353	0.5556	0.5641	0.5246	0.4483	0.4643
LNd_3111	3_Junction_9157_Junction_9158	CG7879	chr3L:1564280-1568416	3_Junction_9157_Junction_9158:001	0.764141	14.7111	0.0041	0.0301407	24	reads okay	CYCLE	CYCLE	#N/A	10	0	22	33	23	50	0	0	7	7	17	21	5	0	0.4074	0.4853	0.8214	0.8197	0	0	0.1795	0.2593	0.9444	1	0.1
LNd_3112	3_Junction_9157_Junction_9158	CG7879	chr3L:1564280-1568416	3_Junction_9157_Junction_9158:002	0.764141	2.71112	0.0041	0.0301407	24	reads okay	CYCLE	CYCLE	#N/A	10	39	32	35	5	11	22	2	32	20	1	0	45	1	0.5926	0.5147	0.1786	0.1803	1	1	0.8205	0.7407	0.0556	0	0.9
LNd_3191	5_Junction_10406_Junction_10407_Junction_10408	mub	chr3L:21914087-21914155	5_Junction_10406_Junction_10407_Junction_10408:001	0.116975	8.54624	0.5773	1	20.5333	reads okay	FALSE	FALSE	#N/A	10	11	9	0	1	0	0	17	30	42	37	15	9	0.4783	1	0	1	0	0	0.5	0.4478	0.5122	0.6379	0.3846	0.5
LNd_3192	5_Junction_10406_Junction_10407_Junction_10408	mub	chr3L:21914087-21914155	5_Junction_10406_Junction_10407_Junction_10408:002	0.30024	8.97406	0.1419	0.752279	24	reads okay	FALSE	FALSE	#N/A	10	6	0	6	0	0	0	5	21	27	6	9	0	0.2609	0	1	0	0	0	0.1471	0.3134	0.3293	0.1034	0.2308	0
LNd_3193	5_Junction_10406_Junction_10407_Junction_10408	mub	chr3L:21914087-21914155	5_Junction_10406_Junction_10407_Junction_10408:003	0.620536	20.7918	0.0055	0.00813893	24	reads okay	CYCLE	CYCLE	#N/A	10	6	0	0	0	13	8	12	16	13	15	15	9	0.2609	0	0	0	1	1	0.3529	0.2388	0.1585	0.2586	0.3846	0.5
LNd_3223	5_Junction_10512_Junction_10513	SPoCk	chr3L:22777852-22778381	5_Junction_10512_Junction_10513:001	0.643589	13.8664	0.0033	0.0212923	24	reads okay	CYCLE	CYCLE	#N/A	10	0	0	12	13	23	0	0	3	5	9	15	1	0	INF	0.6316	0.3824	0.3833	0	0	0.1429	0.2381	1	0.3	0.25
LNd_3224	5_Junction_10512_Junction_10513	SPoCk	chr3L:22777852-22778381	5_Junction_10512_Junction_10513:002	0.369035	23.8277	0.1232	0.182464	24	reads okay	FALSE	FALSE	#N/A	10	14	0	7	21	37	26	34	18	16	0	35	3	1	INF	0.3684	0.6176	0.6167	1	1	0.8571	0.7619	0	0.7	0.75
LNd_3304	5_Junction_11182_Junction_11183	CG42540	chr3L:4575758-4578758	5_Junction_11182_Junction_11183:001	0.00743672	13.5631	0.9677	1	20.5333	reads okay	FALSE	FALSE	mRNA cycles	5.50055	2	5	9	0	1	28	2	21	7	14	0	1	0.1818	0.4545	1	INF	1	0.7778	0.2857	0.3962	0.2917	0.5385	INF	0.3333
LNd_3305	5_Junction_11182_Junction_11183	CG42540	chr3L:4575758-4578758	5_Junction_11182_Junction_11183:002	0.526087	3.71951	0.0462	0.283057	24	reads okay	CYCLE	FALSE	mRNA cycles	8.182	9	6	0	0	0	8	5	32	17	12	0	2	0.8182	0.5455	0	INF	0	0.2222	0.7143	0.6038	0.7083	0.4615	INF	0.6667
LNd_3320	5_Junction_11298_Junction_11299	sif	chr3L:5668308-5669375	5_Junction_11298_Junction_11299:001	0.481486	21.8957	0.0395	0.425517	24	reads okay	FALSE	FALSE	mRNA cycles	7	8	0	0	0	0	14	0	3	0	3	13	3	0.32	0	0	INF	INF	0.7	0	0.1	0	0.2	0.26	0.4286
LNd_3321	5_Junction_11298_Junction_11299	sif	chr3L:5668308-5669375	5_Junction_11298_Junction_11299:002	0.507148	6.37872	0.0493	0.283057	24	reads okay	CYCLE	FALSE	mRNA cycles	3.33333	17	12	17	0	0	6	7	27	17	12	37	4	0.68	1	1	INF	INF	0.3	1	0.9	1	0.8	0.74	0.5714
LNd_3562	5_Junction_13101_Junction_13102	Fas1	chr3R:12460104-12461266	5_Junction_13101_Junction_13102:001	0.237794	11.0929	0.294	0.0389891	16	reads okay	FALSE	CYCLE	#N/A	1.92864	44	75	57	2	36	151	28	122	153	49	40	91	0.7333	0.8929	1	1	0.6102	1	0.5185	0.9531	0.9562	0.9608	0.7407	0.9286
LNd_3563	5_Junction_13101_Junction_13102	Fas1	chr3R:12460104-12461266	5_Junction_13101_Junction_13102:002	0.237794	23.0929	0.294	0.0389891	16	reads okay	FALSE	CYCLE	#N/A	4.815	16	9	0	0	23	0	26	6	7	2	14	7	0.2667	0.1071	0	0	0.3898	0	0.4815	0.0469	0.0438	0.0392	0.2593	0.0714
LNd_3921	5_Junction_13865_Junction_13866	Cha	chr3R:14531828-14549708	5_Junction_13865_Junction_13866:001	0.533524	4.63479	0.0409	0.425517	24	reads okay	CYCLE	FALSE	mRNA cycles	10	14	2	2	0	0	14	11	16	24	11	0	4	0.875	0.5	1	INF	0	0.5385	0.9167	0.4706	0.5217	0.4231	INF	0.4444
LNd_3922	5_Junction_13865_Junction_13866	Cha	chr3R:14531828-14549708	5_Junction_13865_Junction_13866:002	0.0309041	19.2771	0.8743	1	20.5333	reads okay	FALSE	FALSE	mRNA cycles	10	2	2	0	0	11	12	1	18	22	15	0	5	0.125	0.5	0	INF	1	0.4615	0.0833	0.5294	0.4783	0.5769	INF	0.5556
LNd_4054	5_Junction_14845_Junction_14846	klg	chr3R:18741358-18774397	5_Junction_14845_Junction_14846:001	0.551162	16.4465	0.0325	0.0680175	24	reads okay	CYCLE	FALSE	#N/A	10	0	0	5	1	19	16	1	1	5	7	12	1	0	0	0.2632	1	0.5758	0.4848	0.0833	0.25	0.5556	0.7	0.4444	1
LNd_4055	5_Junction_14845_Junction_14846	klg	chr3R:18741358-18774397	5_Junction_14845_Junction_14846:002	0.551162	4.44652	0.0325	0.0680175	24	reads okay	CYCLE	FALSE	#N/A	10	11	30	14	0	14	17	11	3	4	3	15	0	1	1	0.7368	0	0.4242	0.5152	0.9167	0.75	0.4444	0.3	0.5556	0
LNd_4154	5_Junction_16273_Junction_16274	CG14509	chr3R:25001150-25002275	5_Junction_16273_Junction_16274:001	0.599868	9.52583	0.0273	0.113556	24	reads okay	CYCLE	FALSE	#N/A	10	8	4	7	1	0	0	0	24	25	16	4	0	0.4	1	1	0.0833	INF	0	0	0.75	0.8929	1	0.6667	INF
LNd_4155	5_Junction_16273_Junction_16274	CG14509	chr3R:25001150-25002275	5_Junction_16273_Junction_16274:002	0.165643	23.4769	0.4132	1	20.5333	FALSE	FALSE	FALSE	#N/A	10	12	0	0	11	0	29	7	8	3	0	2	0	0.6	0	0	0.9167	INF	1	1	0.25	0.1071	0	0.3333	INF
LNd_4167	5_Junction_1651_Junction_1652_Junction_1653	CG17544	chr2L:19393656-19398349	5_Junction_1651_Junction_1652_Junction_1653:001	0.0854771	3.79271	0.6573	0.283057	16	FALSE	FALSE	FALSE	#N/A	7.5	0	9	2	0	0	6	0	1	0	0	0	29	0	0.45	0.6667	INF	0	0.75	INF	0.3333	0	INF	INF	0.3452
LNd_4168	5_Junction_1651_Junction_1652_Junction_1653	CG17544	chr2L:19393656-19398349	5_Junction_1651_Junction_1652_Junction_1653:002	0.511468	3.5076	0.0344	0.23276	22	reads okay	CYCLE	FALSE	#N/A	10	28	11	0	0	0	2	0	2	2	0	0	33	1	0.55	0	INF	0	0.25	INF	0.6667	0.2857	INF	INF	0.3929
LNd_4169	5_Junction_1651_Junction_1652_Junction_1653	CG17544	chr2L:19393656-19398349	5_Junction_1651_Junction_1652_Junction_1653:003	0.111291	14.7828	0.6325	1	20.5333	reads okay	FALSE	FALSE	#N/A	10	0	0	1	0	19	0	0	0	5	0	0	22	0	0	0.3333	INF	1	0	INF	0	0.7143	INF	INF	0.2619
LNd_4200	5_Junction_16823_Junction_16824	lap	chr3R:3022115-3024048	5_Junction_16823_Junction_16824:001	0.382975	1.05246	0.1214	0.425517	20	reads okay	FALSE	FALSE	mRNA cycles	10	9	0	12	0	5	7	13	15	12	0	1	22	0.4091	INF	0.6316	0	0.0735	1	1	0.5769	0.5455	0	0.25	1
LNd_4201	5_Junction_16823_Junction_16824	lap	chr3R:3022115-3024048	5_Junction_16823_Junction_16824:002	0.580888	14.5775	0.0295	0.0301407	20	reads okay	CYCLE	CYCLE	mRNA cycles	10	13	0	7	9	63	0	0	11	10	2	3	0	0.5909	INF	0.3684	1	0.9265	0	0	0.4231	0.4545	1	0.75	0
LNd_4214	5_Junction_17019_Junction_17020	bel	chr3R:4481628-4481707	5_Junction_17019_Junction_17020:001	0.522988	5.33362	0.0285	0.14801	24	reads okay	CYCLE	FALSE	#N/A	9.5	11	19	4	0	0	0	7	9	6	6	0	13	0.6111	0.95	0.5	0	0	0	0.28	0.2308	0.1818	0.2069	0	0.3421
LNd_4215	5_Junction_17019_Junction_17020	bel	chr3R:4481628-4481707	5_Junction_17019_Junction_17020:002	0.522988	17.3336	0.0286	0.14801	24	reads okay	CYCLE	FALSE	#N/A	20	7	1	4	3	17	15	18	30	27	23	25	25	0.3889	0.05	0.5	1	1	1	0.72	0.7692	0.8182	0.7931	1	0.6579
LNd_4318	5_Junction_17864_Junction_17865	Lk6	chr3R:7582214-7589204	5_Junction_17864_Junction_17865:002	0.246433	2.00203	0.2754	0.0161336	16	reads okay	FALSE	CYCLE	#N/A	10	0	10	0	0	1	20	14	11	30	0	20	54	0	1	0	INF	0.1429	1	0.7368	1	0.75	INF	0.8	0.806
LNd_4341	5_Junction_18209_Junction_18210	B52	chr3R:9488126-9488690	5_Junction_18209_Junction_18210:001	0.617728	16.3018	0.0172	0.14801	24	reads okay	CYCLE	FALSE	#N/A	10	0	0	10	1	4	56	0	14	12	18	18	4	0	0	0.4545	1	1	0.7671	0	0.3889	0.3	0.3673	0.72	0.1905
LNd_4342	5_Junction_18209_Junction_18210	B52	chr3R:9488126-9488690	5_Junction_18209_Junction_18210:002	0.617728	4.30176	0.0172	0.14801	24	reads okay	CYCLE	FALSE	#N/A	10	23	8	12	0	0	17	39	22	28	31	7	17	1	1	0.5455	0	0	0.2329	1	0.6111	0.7	0.6327	0.28	0.8095
LNd_4992	5_Junction_20946_Junction_20947	Arp2	chrX:16444498-16446371	5_Junction_20946_Junction_20947:001	0.530575	5.99485	0.0413	0.23276	24	reads okay	CYCLE	FALSE	#N/A	10	6	4	5	0	0	0	16	10	13	15	0	9	1	0.2667	0.7143	INF	INF	INF	0.4103	0.8333	0.4815	0.4545	0	0.2432
LNd_4993	5_Junction_20946_Junction_20947	Arp2	chrX:16444498-16446371	5_Junction_20946_Junction_20947:002	0.000357366	17.8049	0.9992	1	20.5333	reads okay	FALSE	FALSE	#N/A	10	0	11	2	0	0	0	23	2	14	18	3	28	0	0.7333	0.2857	INF	INF	INF	0.5897	0.1667	0.5185	0.5455	1	0.7568
LNd_5157	5_Junction_22080_Junction_22081	sgg	chrX:2567651-2571132	5_Junction_22080_Junction_22081:001	0.576555	19.7246	0.0301	0.354287	24	reads okay	CYCLE	FALSE	#N/A	5.556	0	0	1	4	12	20	2	2	2	0	7	20	0	0	0.125	0.3636	0.48	0.4167	0.1818	0.04	0.0308	0	0.1944	0.5556
LNd_5158	5_Junction_22080_Junction_22081	sgg	chrX:2567651-2571132	5_Junction_22080_Junction_22081:002	0.576555	7.7246	0.0301	0.354287	24	reads okay	CYCLE	FALSE	#N/A	2.25023	15	30	7	7	13	28	9	48	63	48	29	16	1	1	0.875	0.6364	0.52	0.5833	0.8182	0.96	0.9692	1	0.8056	0.4444
LNd_5339	5_Junction_22845_Junction_22846	dnc	chrX:3150760-3165225	5_Junction_22845_Junction_22846:001	0.565862	9.26917	0.0234	0.182464	24	FALSE	FALSE	FALSE	#N/A	7.5	9	11	6	3	17	0	4	4	2	2	10	1	0.5294	0.6875	0.75	0.5	0.5	0	0.2667	0.4444	0.6667	0.3333	0.3125	0.3333
LNd_5340	5_Junction_22845_Junction_22846	dnc	chrX:3150760-3165225	5_Junction_22845_Junction_22846:002	0.565862	21.2692	0.0234	0.182464	24	reads okay	CYCLE	FALSE	#N/A	4	8	5	2	3	17	3	11	5	1	4	22	2	0.4706	0.3125	0.25	0.5	0.5	1	0.7333	0.5556	0.3333	0.6667	0.6875	0.6667
LNd_5702	5_Junction_2648_Junction_2649	Gs1l	chr2L:4455738-4456112	5_Junction_2648_Junction_2649:002	0.321302	14.7857	0.1706	0.0161336	16	reads okay	FALSE	CYCLE	#N/A	2.5	6	0	14	1	2	19	16	14	25	9	23	16	0.6667	INF	0.5833	1	0.4	0.4634	0.4571	0.4375	0.6098	0.8182	0.575	0.4571
LNd_5764	5_Junction_3325_Junction_3326	RpL36A	chr2L:8042613-8042821	5_Junction_3325_Junction_3326:001	0.504611	10.4864	0.048	0.354287	18	reads okay	CYCLE	FALSE	#N/A	3.235	0	0	13	0	0	0	0	3	11	6	0	5	0	0	0.2889	0	0	0	0	0.125	0.3235	0.2308	0	0.0746
LNd_5765	5_Junction_3325_Junction_3326	RpL36A	chr2L:8042613-8042821	5_Junction_3325_Junction_3326:002	0.504611	22.4864	0.049	0.354287	18	reads okay	CYCLE	FALSE	#N/A	1.4782	14	20	32	17	42	28	101	21	23	20	21	62	1	1	0.7111	1	1	1	1	0.875	0.6765	0.7692	1	0.9254
LNd_5907	5_Junction_5028_Junction_5029	cora	chr2R:15124568-15125655	5_Junction_5028_Junction_5029:001	0.547974	8.04425	0.0222	0.113556	20	FALSE	FALSE	FALSE	#N/A	10	1	6	5	0	0	0	0	5	5	3	0	2	0.0588	1	1	0	0	0	0	0.625	0.2	0.375	0	0.1538
LNd_5908	5_Junction_5028_Junction_5029	cora	chr2R:15124568-15125655	5_Junction_5028_Junction_5029:002	0.547974	20.0442	0.0222	0.113556	20	reads okay	CYCLE	FALSE	#N/A	10	16	0	0	1	7	21	16	3	20	5	9	11	0.9412	0	0	1	1	1	1	0.375	0.8	0.625	1	0.8462
LNd_5957	5_Junction_5452_Junction_5453	Fkbp14	chr2R:17382831-17385284	5_Junction_5452_Junction_5453:001	0.240257	3.45332	0.2767	1	20.5333	reads okay	FALSE	FALSE	#N/A	10	0	0	13	0	0	0	91	1	6	0	0	146	INF	0	0.2889	0	0	INF	1	1	0.4615	0	INF	1
LNd_5958	5_Junction_5452_Junction_5453	Fkbp14	chr2R:17382831-17385284	5_Junction_5452_Junction_5453:002	0.537569	12.5063	0.0411	0.425517	22	reads okay	CYCLE	FALSE	#N/A	10	0	21	32	31	12	0	0	0	7	13	0	0	INF	1	0.7111	1	1	INF	0	0	0.5385	1	INF	0
LNd_5965	5_Junction_546_Junction_547	CG31922	chr2L:1170363-1170428	5_Junction_546_Junction_547:001	0.624288	13.8962	0.0186	0.523397	24	reads okay	CYCLE	FALSE	#N/A	2.33318	0	29	20	11	29	0	0	3	8	31	27	7	INF	0.6591	1	1	1	INF	INF	0.4286	1	0.8378	1	1
LNd_5966	5_Junction_546_Junction_547	CG31922	chr2L:1170363-1170428	5_Junction_546_Junction_547:002	0.317691	6.63947	0.1384	1	20.5333	FALSE	FALSE	FALSE	#N/A	5.714	0	15	0	0	0	0	0	4	0	6	0	0	INF	0.3409	0	0	0	INF	INF	0.5714	0	0.1622	0	0
LNd_6015	5_Junction_6309_Junction_6310_Junction_6311	Vha16-1	chr2R:2519645-2520498	5_Junction_6309_Junction_6310_Junction_6311:001	0.380453	1.23993	0.1176	0.182464	20	FALSE	FALSE	FALSE	#N/A	7.073	9	5	0	0	9	29	4	3	2	2	0	7	0.4286	0.625	0	0	0.1698	0.7073	0.1429	0.1429	0.1053	0.1333	0	0.2692
LNd_6016	5_Junction_6309_Junction_6310_Junction_6311	Vha16-1	chr2R:2519645-2520498	5_Junction_6309_Junction_6310_Junction_6311:002	0.0990447	4.85645	0.6418	1	20.5333	reads okay	FALSE	FALSE	#N/A	6.786	4	0	7	4	5	12	19	7	4	4	0	7	0.1905	0	0.5	0.2857	0.0943	0.2927	0.6786	0.3333	0.2105	0.2667	0	0.2692
LNd_6017	5_Junction_6309_Junction_6310_Junction_6311	Vha16-1	chr2R:2519645-2520498	5_Junction_6309_Junction_6310_Junction_6311:003	0.506169	14.2461	0.0374	0.14801	24	reads okay	CYCLE	FALSE	#N/A	10	8	3	7	10	39	0	5	11	13	9	22	12	0.381	0.375	0.5	0.7143	0.7358	0	0.1786	0.5238	0.6842	0.6	1	0.4615
LNd_6228	5_Junction_6622_Junction_6623	CG30497	chr2R:3629425-3645538	5_Junction_6622_Junction_6623:001	0.552136	3.03064	0.0227	0.14801	24	reads okay	CYCLE	FALSE	#N/A	2.18198	17	10	11	0	22	24	1	17	18	7	0	2	1	0.625	0.5789	INF	0.4583	1	1	0.7727	0.7826	0.6364	INF	0.6667
LNd_6229	5_Junction_6622_Junction_6623	CG30497	chr2R:3629425-3645538	5_Junction_6622_Junction_6623:002	0.127063	11.7931	0.5178	1	20.5333	FALSE	FALSE	FALSE	#N/A	5.417	0	6	8	0	26	0	0	5	5	4	0	1	0	0.375	0.4211	INF	0.5417	0	0	0.2273	0.2174	0.3636	INF	0.3333
LNd_6522	5_Junction_8963_Junction_8964_Junction_8965_Junction_8966	fz	chr3L:14284264-14355515	5_Junction_8963_Junction_8964_Junction_8965_Junction_8966:001	0.40373	8.71744	0.0893	0.0212923	20	reads okay	FALSE	CYCLE	#N/A	4.89853	7	11	11	4	7	7	4	7	13	2	3	4	0.1591	0.3333	0.5	0.2	0.1628	0.28	0.16	0.7	0.4194	0.5	0.1429	0.3333
LNd_6534	5_Junction_9156_Junction_9157	CG7879	chr3L:1564280-1568416	5_Junction_9156_Junction_9157:001	0.230931	2.61729	0.3037	1	20.5333	reads okay	FALSE	FALSE	#N/A	10	15	7	6	0	9	0	0	6	2	0	11	3	1	0.2414	0.1538	0	0.1525	INF	INF	0.4615	0.2222	0	0.3438	0.375
LNd_6535	5_Junction_9156_Junction_9157	CG7879	chr3L:1564280-1568416	5_Junction_9156_Junction_9157:002	0.762207	13.0153	0.001	0.00165945	24	reads okay	CYCLE	CYCLE	#N/A	10	0	22	33	23	50	0	0	7	7	17	21	5	0	0.7586	0.8462	1	0.8475	INF	INF	0.5385	0.7778	1	0.6562	0.625
LNd_6572	5_Junction_9500_Junction_9501	Nc73EF	chr3L:16958078-16960480	5_Junction_9500_Junction_9501:001	0.5032	22.1162	0.0395	0.14801	22	reads okay	CYCLE	FALSE	#N/A	3.50018	8	29	6	10	10	31	77	33	50	24	19	94	1	0.58	0.2857	0.3226	1	0.6889	0.5969	0.4177	0.4545	0.6316	0.5938	0.7581
LNd_6573	5_Junction_9500_Junction_9501	Nc73EF	chr3L:16958078-16960480	5_Junction_9500_Junction_9501:002	0.5032	10.1162	0.0395	0.14801	22	reads okay	CYCLE	FALSE	#N/A	7.143	0	21	15	21	0	14	52	46	60	14	13	30	0	0.42	0.7143	0.6774	0	0.3111	0.4031	0.5823	0.5455	0.3684	0.4062	0.2419
LNd_6756	intronretentionleft-Junction_20721	mmd	chrX:15852575-15856017	intronretentionleft-Junction_20721:001	0.626161	2.13221	0.0183	0.23276	24	reads okay	CYCLE	FALSE	mRNA cycles	2.63726	39	19	10	33	12	15	37	68	83	35	20	91	0.5	0.6129	0.2439	0.2324	0.2727	0.5556	0.5692	0.3178	0.3281	0.3302	0.2564	0.3824
LNd_6757	intronretentionleft-Junction_20721	mmd	chrX:15852575-15856017	intronretentionleft-Junction_20721:002	0.626161	14.1322	0.0183	0.23276	24	reads okay	CYCLE	FALSE	mRNA cycles	1.98295	39	12	31	109	32	12	28	146	170	71	58	147	0.5	0.3871	0.7561	0.7676	0.7273	0.4444	0.4308	0.6822	0.6719	0.6698	0.7436	0.6176

## Sheet: DN1
cycling ID	junction ID	gene	locataion of longest junction	junction ID	F24 score	phase	p-value F24	JTK p-valuse	JTK phase	>10 reads	F24 10 cycle	JTK 10 cycle	mRNA cycles	amplitude (if min is 0 amplitude is Max *10)	reads 2	reads 6	reads 10	reads 14	reads 18	reads 22	reads 26	reads 30	reads 34	reads 38	reads 42	reads 46	2 percentage usage	6 percentage usage	10 percentage usage	14 percentage usage	18 percentage usage	22 percentage usage	2 percentage usage	6 percentage usage	10 percentage usage	14 percentage usage	18 percentage usage	22 percentage usage
Dn1_10211	5_Junction_33042_Junction_33043	CG15465	chrX:5132300-5137408	5_Junction_33042_Junction_33043	0.689271	23.5047	0.004	0.0535033	24	reads okay	CYCLE	FALSE	#N/A	5	19	5	0	1	13	12	10	4	0	12	14	1	0.7917	0.7143	INF	0.2	0.9286	0.9231	1	1	INF	0.5714	0.6667	1
Dn1_10212	5_Junction_33042_Junction_33043	CG15465	chrX:5132300-5137408	5_Junction_33042_Junction_33043	0.278603	14.6169	0.2246	1	20.5333	FALSE	FALSE	FALSE	#N/A	8	5	2	0	4	1	1	0	0	0	9	7	0	0.2083	0.2857	INF	0.8	0.0714	0.0769	0	0	INF	0.4286	0.3333	0
Dn1_10217	5_Junction_33055_Junction_33056	mod(r)	chrX:516391-516477	5_Junction_33055_Junction_33056	0.300859	5.72747	0.2028	0.354287	24	reads okay	FALSE	FALSE	#N/A	2.83366	10	12	0	7	6	8	15	3	6	16	11	3	0.5882	1	INF	0.6364	0.3529	0.3636	1	1	1	0.6957	0.3929	0.5
Dn1_10218	5_Junction_33055_Junction_33056	mod(r)	chrX:516391-516477	5_Junction_33055_Junction_33056	0.877321	19.4233	0.0007	0.0109748	24	reads okay	CYCLE	CYCLE	#N/A	6.471	7	0	0	4	11	14	0	0	0	7	17	3	0.4118	0	INF	0.3636	0.6471	0.6364	0	0	0	0.3043	0.6071	0.5
Dn1_10264	5_Junction_33270_Junction_33271	CG3726	chrX:5811660-5832600	5_Junction_33270_Junction_33271	0.399862	18	0.0198	1	20.5333	reads okay	FALSE	FALSE	mRNA cycles	6.207	0	0	0	0	15	0	0	0	0	0	18	0	0	0	INF	INF	0.6	0	0	0	0	INF	0.6207	INF
Dn1_10265	5_Junction_33270_Junction_33271	CG3726	chrX:5811660-5832600	5_Junction_33270_Junction_33271	0.534333	3.46982	0.0429	0.425517	24	reads okay	CYCLE	FALSE	mRNA cycles	2.63644	4	2	0	0	10	11	2	1	3	0	11	0	1	1	INF	INF	0.4	1	1	1	1	INF	0.3793	INF
Dn1_10278	5_Junction_3328_Junction_3329	NTPase	chr2L:2882833-2884991	5_Junction_3328_Junction_3329	0.0877681	10.6749	0.7358	1	20.5333	FALSE	FALSE	FALSE	#N/A	10	1	2	0	0	5	2	3	0	1	6	7	0	0.125	0.1667	INF	0	0.2174	0.1818	0.4286	INF	1	0.5	0.1458	0
Dn1_10279	5_Junction_3328_Junction_3329	NTPase	chr2L:2882833-2884991	5_Junction_3328_Junction_3329	0.529832	20.7534	0.0387	0.523397	24	reads okay	CYCLE	FALSE	#N/A	10	7	10	0	1	18	9	4	0	0	6	41	16	0.875	0.8333	INF	1	0.7826	0.8182	0.5714	INF	0	0.5	0.8542	1
Dn1_10373	5_Junction_33696_Junction_33697_Junction_33698	Sxl	chrX:6981692-6985705	5_Junction_33696_Junction_33697_Junction_33698	0.00159066	17.3766	0.994	1	20.5333	FALSE	FALSE	FALSE	mRNA cycles	7	4	2	0	1	4	0	0	1	5	4	0	14	0.2105	0.1111	INF	0.0909	0.1429	0	0	0.3333	0.3333	0.5	0	0.7
Dn1_10374	5_Junction_33696_Junction_33697_Junction_33698	Sxl	chrX:6981692-6985705	5_Junction_33696_Junction_33697_Junction_33698	0.610765	19.1952	0.0208	0.0907868	24	reads okay	CYCLE	FALSE	mRNA cycles	6.667	8	2	0	5	12	6	0	0	1	1	22	5	0.4211	0.1111	INF	0.4545	0.4286	0.5	0	0	0.0667	0.125	0.6667	0.25
Dn1_10375	5_Junction_33696_Junction_33697_Junction_33698	Sxl	chrX:6981692-6985705	5_Junction_33696_Junction_33697_Junction_33698	0.217519	4.43805	0.3378	1	20.5333	reads okay	FALSE	FALSE	mRNA cycles	20	7	14	0	5	12	6	10	2	9	3	11	1	0.3684	0.7778	INF	0.4545	0.4286	0.5	1	0.6667	0.6	0.375	0.3333	0.05
Dn1_10415	5_Junction_3406_Junction_3407	toc	chr2L:3081268-3094215	5_Junction_3406_Junction_3407	0.570254	19.2549	0.0253	0.182464	24	reads okay	CYCLE	FALSE	mRNA cycles	8.333	6	2	0	3	24	15	0	0	0	18	28	5	0.3529	0.3333	0	0.5	0.5333	0.4167	INF	0	INF	0.4865	0.4242	0.8333
Dn1_10416	5_Junction_3406_Junction_3407	toc	chr2L:3081268-3094215	5_Junction_3406_Junction_3407	0.0859854	8.88826	0.6614	1	20.5333	reads okay	FALSE	FALSE	mRNA cycles	5.9988	11	4	12	3	21	21	0	8	0	19	38	1	0.6471	0.6667	1	0.5	0.4667	0.5833	INF	1	INF	0.5135	0.5758	0.1667
Dn1_10573	5_Junction_34521_Junction_34522_Junction_34523	Moe	chrX:8774433-8792215	5_Junction_34521_Junction_34522_Junction_34523	0.584483	18.0259	0.0278	0.425517	24	reads okay	CYCLE	FALSE	#N/A	7.037	3	1	0	4	23	0	0	0	0	4	22	19	0.1429	0.1429	INF	0.5	0.6216	0	INF	0	0	0.3333	0.5238	0.7037
Dn1_10574	5_Junction_34521_Junction_34522_Junction_34523	Moe	chrX:8774433-8792215	5_Junction_34521_Junction_34522_Junction_34523	0.158271	7.29175	0.4636	1	20.5333	FALSE	FALSE	FALSE	#N/A	5.833	9	3	0	1	0	0	0	6	0	7	0	0	0.4286	0.4286	INF	0.125	0	0	INF	0.4	0	0.5833	0	0
Dn1_10575	5_Junction_34521_Junction_34522_Junction_34523	Moe	chrX:8774433-8792215	5_Junction_34521_Junction_34522_Junction_34523	0.00745985	0.181847	0.9618	1	20.5333	reads okay	FALSE	FALSE	#N/A	12.0048	9	3	0	3	14	20	0	9	6	1	20	8	0.4286	0.4286	INF	0.375	0.3784	1	INF	0.6	1	0.0833	0.4762	0.2963
Dn1_10588	5_Junction_34663_Junction_34664	CG34449	chrX:9249211-9250243	5_Junction_34663_Junction_34664	0.746347	21.0664	0.009	0.182464	24	reads okay	CYCLE	FALSE	#N/A	10	12	0	0	0	13	7	0	0	0	0	17	1	0.75	0	INF	INF	0.7647	0.7	0	INF	0	0	0.8095	1
Dn1_10589	5_Junction_34663_Junction_34664	CG34449	chrX:9249211-9250243	5_Junction_34663_Junction_34664	0.0957305	7.35846	0.6222	1	20.5333	FALSE	FALSE	FALSE	#N/A	10	4	1	0	0	4	3	5	0	1	4	4	0	0.25	1	INF	INF	0.2353	0.3	1	INF	1	1	0.1905	0
Dn1_10638	5_Junction_3618_Junction_3619	fred	chr2L:3911336-3916779	5_Junction_3618_Junction_3619	0.10185	20.6303	0.5989	0.0301407	16	reads okay	FALSE	CYCLE	#N/A	5.238	9	2	0	8	33	4	4	7	0	4	33	0	0.4091	0.1176	0	0.2162	0.5238	0.0571	0.2105	0.3333	0	0.1143	0.4074	0
Dn1_10639	5_Junction_3618_Junction_3619	fred	chr2L:3911336-3916779	5_Junction_3618_Junction_3619	0.10185	8.63029	0.5989	0.0301407	16	reads okay	FALSE	CYCLE	#N/A	2.09996	13	15	11	29	30	66	15	14	4	31	48	1	0.5909	0.8824	1	0.7838	0.4762	0.9429	0.7895	0.6667	1	0.8857	0.5926	1
Dn1_10654	5_Junction_3807_Junction_3808	pog	chr2L:4874169-4874885	5_Junction_3807_Junction_3808	0.681794	14.1632	0.0093	0.113556	21	reads okay	CYCLE	FALSE	#N/A	3.64187	18	5	34	10	26	27	11	1	6	47	35	6	0.2195	0.1786	0.6071	0.4348	0.4127	0.3803	0.2245	0.1667	0.5	0.5165	0.4217	0.2857
Dn1_10655	5_Junction_3807_Junction_3808	pog	chr2L:4874169-4874885	5_Junction_3807_Junction_3808	0.681794	2.16319	0.0093	0.113556	21	reads okay	CYCLE	FALSE	#N/A	2.1209	64	23	22	13	37	44	38	5	6	44	48	15	0.7805	0.8214	0.3929	0.5652	0.5873	0.6197	0.7755	0.8333	0.5	0.4835	0.5783	0.7143
Dn1_10668	5_Junction_3878_Junction_3879	Rtnl1	chr2L:5004207-5008179	5_Junction_3878_Junction_3879	0.543738	11.022	0.0147	0.0161336	24	reads okay	CYCLE	CYCLE	#N/A	1.63159	98	67	3	91	185	226	19	59	66	109	248	58	0.8448	0.8481	1	0.8426	0.8186	0.7533	0.6129	0.9219	0.9565	0.9083	0.8407	0.8286
Dn1_10669	5_Junction_3878_Junction_3879	Rtnl1	chr2L:5004207-5008179	5_Junction_3878_Junction_3879	0.543738	23.022	0.0147	0.0161336	24	reads okay	CYCLE	CYCLE	#N/A	3.871	18	12	0	17	41	74	12	5	3	11	47	12	0.1552	0.1519	0	0.1574	0.1814	0.2467	0.3871	0.0781	0.0435	0.0917	0.1593	0.1714
Dn1_10707	5_Junction_4111_Junction_4112	TrissinR	chr2L:5851826-5852991	5_Junction_4111_Junction_4112	0.295682	23.8011	0.2054	0.883281	24	reads okay	FALSE	FALSE	#N/A	6.9979	1	3	0	2	7	13	0	0	0	3	11	4	1	1	INF	0.3333	0.2188	0.5652	INF	INF	INF	0.1429	0.3548	1
Dn1_10708	5_Junction_4111_Junction_4112	TrissinR	chr2L:5851826-5852991	5_Junction_4111_Junction_4112	0.772854	16.5729	0.0048	0.182464	24	reads okay	CYCLE	FALSE	#N/A	8.571	0	0	0	4	25	10	0	0	0	18	20	0	0	0	INF	0.6667	0.7812	0.4348	INF	INF	INF	0.8571	0.6452	0
Dn1_10765	5_Junction_4709_Junction_4710	Bsg	chr2L:8089736-8105690	5_Junction_4709_Junction_4710	0.56647	18.9236	0.0063	0.0907868	20	reads okay	CYCLE	FALSE	#N/A	4.118	6	0	0	0	21	13	0	0	0	3	24	3	0.1277	0	INF	0	0.4118	0.1215	0	0	0	0.1034	0.2892	0.0789
Dn1_10766	5_Junction_4709_Junction_4710	Bsg	chr2L:8089736-8105690	5_Junction_4709_Junction_4710	0.0965707	1.55279	0.7618	1	20.5333	reads okay	FALSE	FALSE	#N/A	1.7001	41	21	0	22	30	94	5	12	26	26	59	35	0.8723	1	INF	1	0.5882	0.8785	1	1	1	0.8966	0.7108	0.9211
Dn1_10779	5_Junction_4852_Junction_4853	Scgalpha	chr2L:8304577-8304842	5_Junction_4852_Junction_4853	0.590428	21.4043	0.0162	0.0535033	24	reads okay	CYCLE	FALSE	#N/A	7.5	12	6	0	3	15	48	4	1	0	14	13	3	0.2609	0.2609	0	0.0968	0.3488	0.75	0.3333	0.0476	0	0.4516	0.25	0.4286
Dn1_10780	5_Junction_4852_Junction_4853	Scgalpha	chr2L:8304577-8304842	5_Junction_4852_Junction_4853	0.590428	9.40428	0.0162	0.0535033	24	reads okay	CYCLE	FALSE	#N/A	4	34	17	7	28	28	16	8	20	5	17	39	4	0.7391	0.7391	1	0.9032	0.6512	0.25	0.6667	0.9524	1	0.5484	0.75	0.5714
Dn1_10793	5_Junction_4965_Junction_4966	Sema-1a	chr2L:8663251-8666034	5_Junction_4965_Junction_4966	0.610664	19.6076	0.007	0.113556	24	reads okay	CYCLE	FALSE	#N/A	1.79986	23	5	0	9	55	60	9	0	2	17	83	8	0.7931	0.5556	INF	0.6429	0.9016	0.9231	0.5625	INF	0.6667	0.9444	0.8925	1
Dn1_10794	5_Junction_4965_Junction_4966	Sema-1a	chr2L:8663251-8666034	5_Junction_4965_Junction_4966	0.118962	6.16921	0.5533	1	20.5333	FALSE	FALSE	FALSE	#N/A	4.444	6	4	0	5	6	5	7	0	1	1	10	0	0.2069	0.4444	INF	0.3571	0.0984	0.0769	0.4375	INF	0.3333	0.0556	0.1075	0
Dn1_10839	5_Junction_5408_Junction_5409	Ih	chr2R:10167147-10173205	5_Junction_5408_Junction_5409	0.805935	18.6424	0.0037	0.283057	24	reads okay	CYCLE	FALSE	#N/A	7.5	0	0	0	1	16	16	0	0	0	5	25	6	0	0	INF	0.3333	0.5	0.5517	0	INF	INF	0.5556	0.5102	0.75
Dn1_10840	5_Junction_5408_Junction_5409	Ih	chr2R:10167147-10173205	5_Junction_5408_Junction_5409	0.198867	0.292598	0.354	0.113556	16	reads okay	FALSE	FALSE	#N/A	4	1	2	0	2	16	13	1	0	0	4	24	2	1	1	INF	0.6667	0.5	0.4483	1	INF	INF	0.4444	0.4898	0.25
Dn1_10865	5_Junction_5706_Junction_5707	mus210	chr2R:11199472-11199539	5_Junction_5706_Junction_5707	0.752134	23.2566	0.0014	0.0680175	22	reads okay	CYCLE	FALSE	#N/A	10	2	0	0	0	10	12	1	0	1	0	13	6	0.5	0	INF	INF	0.3125	0.5714	1	0	0.05	0	0.3023	0.6667
Dn1_10866	5_Junction_5706_Junction_5707	mus210	chr2R:11199472-11199539	5_Junction_5706_Junction_5707	0.0529664	9.49359	0.7727	1	20.5333	reads okay	FALSE	FALSE	#N/A	10	2	1	0	0	22	9	0	3	19	6	30	3	0.5	1	INF	INF	0.6875	0.4286	0	1	0.95	1	0.6977	0.3333
Dn1_10874	5_Junction_5795_Junction_5796	Flo1	chr2R:11455218-11455655	5_Junction_5795_Junction_5796	0.508589	9.47042	0.0402	0.283057	24	reads okay	CYCLE	FALSE	#N/A	1.66667	34	23	16	29	33	37	55	30	8	42	59	6	0.7907	0.8519	1	0.9062	0.9167	0.7551	0.873	1	1	0.75	0.831	0.6
Dn1_10875	5_Junction_5795_Junction_5796	Flo1	chr2R:11455218-11455655	5_Junction_5795_Junction_5796	0.508589	21.4704	0.0402	0.283057	24	reads okay	CYCLE	FALSE	#N/A	4	9	4	0	3	3	12	8	0	0	14	12	4	0.2093	0.1481	0	0.0938	0.0833	0.2449	0.127	0	0	0.25	0.169	0.4
Dn1_10910	5_Junction_6217_Junction_6218	unc-104	chr2R:12651879-12653336	5_Junction_6217_Junction_6218	0.578998	20.0168	0.0291	0.23276	24	reads okay	CYCLE	FALSE	#N/A	4.792	28	2	0	2	63	46	0	0	7	1	85	12	0.3544	0.0952	0	0.1818	0.4632	0.4792	INF	0	0.2333	0.0303	0.4521	0.3
Dn1_10911	5_Junction_6217_Junction_6218	unc-104	chr2R:12651879-12653336	5_Junction_6217_Junction_6218	0.452342	10.6903	0.0485	0.0907868	20	reads okay	FALSE	FALSE	#N/A	1.92012	51	19	10	9	73	50	0	27	23	32	103	28	0.6456	0.9048	1	0.8182	0.5368	0.5208	INF	1	0.7667	0.9697	0.5479	0.7
Dn1_10916	5_Junction_6233_Junction_6234	CG5522	chr2R:12677420-12678242	5_Junction_6233_Junction_6234	0.637876	22.7794	0.0043	0.0389891	20	reads okay	CYCLE	CYCLE	#N/A	8.095	34	8	0	12	39	36	17	5	5	26	50	8	0.6071	0.3333	0	0.3429	0.5	0.4932	0.8095	0.3333	0.3571	0.4483	0.4587	0.8
Dn1_10917	5_Junction_6233_Junction_6234	CG5522	chr2R:12677420-12678242	5_Junction_6233_Junction_6234	0.637876	10.7794	0.0043	0.0389891	20	reads okay	CYCLE	CYCLE	#N/A	5.24934	22	16	11	23	39	37	4	10	9	32	59	2	0.3929	0.6667	1	0.6571	0.5	0.5068	0.1905	0.6667	0.6429	0.5517	0.5413	0.2
Dn1_10991	5_Junction_7024_Junction_7025	cora	chr2R:15124568-15125655	5_Junction_7024_Junction_7025	0.2179	12.1641	0.3248	1	20.5333	FALSE	FALSE	FALSE	#N/A	10	5	1	0	6	11	7	0	0	3	2	8	0	0.625	1	INF	0.8571	0.5	0.3889	0	0	1	1	0.2581	0
Dn1_10992	5_Junction_7024_Junction_7025	cora	chr2R:15124568-15125655	5_Junction_7024_Junction_7025	0.539347	23.3375	0.0441	0.283057	24	reads okay	CYCLE	FALSE	#N/A	10	3	0	0	1	11	11	5	1	0	0	23	1	0.375	0	INF	0.1429	0.5	0.6111	1	1	0	0	0.7419	1
Dn1_11008	5_Junction_7165_Junction_7166	par-1	chr2R:15366370-15370455	5_Junction_7165_Junction_7166	0.0729101	6.30958	0.7503	1	20.5333	reads okay	FALSE	FALSE	#N/A	2.20022	21	21	0	18	37	23	5	11	7	16	78	7	0.7241	0.875	INF	0.72	0.5286	0.4894	0.4545	1	1	0.64	0.6	0.6364
Dn1_11009	5_Junction_7165_Junction_7166	par-1	chr2R:15366370-15370455	5_Junction_7165_Junction_7166	0.756422	20.6609	0.0037	0.0389891	22	reads okay	CYCLE	CYCLE	#N/A	5.455	8	3	0	7	33	24	6	0	0	9	52	4	0.2759	0.125	INF	0.28	0.4714	0.5106	0.5455	0	0	0.36	0.4	0.3636
Dn1_11040	5_Junction_7369_Junction_7370	bl	chr2R:16483319-16485956	5_Junction_7369_Junction_7370	0.641359	19.7362	0.018	0.23276	24	reads okay	CYCLE	FALSE	#N/A	3.3332	6	0	0	8	27	20	0	0	1	0	25	7	0.5455	INF	INF	0.7273	0.6429	0.8333	INF	INF	0.25	INF	0.6757	0.7778
Dn1_11041	5_Junction_7369_Junction_7370	bl	chr2R:16483319-16485956	5_Junction_7369_Junction_7370	0.0522934	16.617	0.8014	1	20.5333	reads okay	FALSE	FALSE	#N/A	4.4991	5	0	0	3	15	4	0	0	3	0	12	2	0.4545	INF	INF	0.2727	0.3571	0.1667	INF	INF	0.75	INF	0.3243	0.2222
Dn1_11081	5_Junction_7698_Junction_7699_Junction_7700_Junction_7701	CG10082	chr2R:17540068-17542278	5_Junction_7698_Junction_7699_Junction_7700_Junction_7701	0.270183	20.284	0.257	0.523397	20	FALSE	FALSE	FALSE	#N/A	2	4	0	0	0	10	2	0	0	0	0	11	0	0.1667	0	INF	0	0.2	0.0385	0	0	0	0	0.125	0
Dn1_11082	5_Junction_7698_Junction_7699_Junction_7700_Junction_7701	CG10082	chr2R:17540068-17542278	5_Junction_7698_Junction_7699_Junction_7700_Junction_7701	0.537808	20.3727	0.0315	0.283057	24	reads okay	CYCLE	FALSE	#N/A	3.654	2	2	0	0	12	19	0	0	0	0	29	2	0.0833	0.1	INF	0	0.24	0.3654	0	0	0	0	0.3295	0.0952
Dn1_11436	5_Junction_8505_Junction_8506	slik	chr2R:20286706-20287721	5_Junction_8505_Junction_8506	0.608493	13.3178	0.0128	0.182464	24	reads okay	CYCLE	FALSE	#N/A	10	7	9	3	5	34	18	0	1	2	12	40	3	0.2414	0.5625	1	1	0.7907	0.6429	0	0.5	1	0.5714	0.6349	0.6
Dn1_11437	5_Junction_8505_Junction_8506	slik	chr2R:20286706-20287721	5_Junction_8505_Junction_8506	0.608493	1.31779	0.0128	0.182464	24	reads okay	CYCLE	FALSE	#N/A	10	22	7	0	0	9	10	4	1	0	9	23	2	0.7586	0.4375	0	0	0.2093	0.3571	1	0.5	0	0.4286	0.3651	0.4
Dn1_11501	5_Junction_9329_Junction_9330	CG45093	chr2R:3629425-3645538	5_Junction_9329_Junction_9330	0.871648	21.6017	0.0008	0.0212923	24	reads okay	CYCLE	CYCLE	#N/A	10	3	0	0	0	12	22	3	0	0	3	31	6	0.6	0	INF	INF	0.8	0.9565	1	INF	0	0.375	0.8158	0.8571
Dn1_11502	5_Junction_9329_Junction_9330	CG45093	chr2R:3629425-3645538	5_Junction_9329_Junction_9330	0.173866	8.97753	0.4347	1	20.5333	FALSE	FALSE	FALSE	#N/A	10	2	6	0	0	3	1	0	0	1	5	7	1	0.4	1	INF	INF	0.2	0.0435	0	INF	1	0.625	0.1842	0.1429
Dn1_11533	5_Junction_9717_Junction_9718	CG14767	chr2R:4607289-4607358	5_Junction_9717_Junction_9718	0.673258	9.1822	0.0011	0.0161336	24	reads okay	CYCLE	CYCLE	mRNA cycles	2.33318	64	27	6	36	72	107	14	13	17	25	148	9	0.7619	0.9	1	0.878	0.6729	0.7535	0.7368	0.9286	0.8947	0.7576	0.7749	0.4286
Dn1_11534	5_Junction_9717_Junction_9718	CG14767	chr2R:4607289-4607358	5_Junction_9717_Junction_9718	0.673258	21.1822	0.0011	0.0161336	24	reads okay	CYCLE	CYCLE	mRNA cycles	5.714	20	3	0	5	35	35	5	1	2	8	43	12	0.2381	0.1	0	0.122	0.3271	0.2465	0.2632	0.0714	0.1053	0.2424	0.2251	0.5714
Dn1_11535	5_Junction_9728_Junction_9729	stmA	chr2R:4619316-4619663	5_Junction_9728_Junction_9729	0.201138	1.20357	0.3665	1	20.5333	FALSE	FALSE	FALSE	#N/A	4	3	2	1	0	1	6	0	0	0	0	10	12	0.2143	0.4	0.1667	0	0.02	0.1667	0	INF	0	0	0.1333	0.375
Dn1_11536	5_Junction_9728_Junction_9729	stmA	chr2R:4619316-4619663	5_Junction_9728_Junction_9729	0.297046	16.4245	0.1623	0.0389891	18	reads okay	FALSE	CYCLE	#N/A	1.66667	11	3	5	20	49	30	9	0	4	7	65	20	0.7857	0.6	0.8333	1	0.98	0.8333	1	INF	1	1	0.8667	0.625
Dn1_1163	3_Junction_17362_Junction_17363	CG3529	chr3L:9442924-9443330	3_Junction_17362_Junction_17363	0.509257	7.20312	0.0424	0.182464	24	reads okay	CYCLE	FALSE	#N/A	6.46552	3	6	1	8	4	11	11	6	1	12	9	2	0.0833	0.3333	0.1429	0.1538	0.058	0.1549	0.1964	0.375	0.25	0.2449	0.0928	0.1538
Dn1_1164	3_Junction_17362_Junction_17363	CG3529	chr3L:9442924-9443330	3_Junction_17362_Junction_17363	0.509257	19.2031	0.0424	0.182464	24	reads okay	CYCLE	FALSE	#N/A	1.5072	33	12	6	44	65	60	45	10	3	37	88	11	0.9167	0.6667	0.8571	0.8462	0.942	0.8451	0.8036	0.625	0.75	0.7551	0.9072	0.8462
Dn1_1247	3_Junction_17973_Junction_18142_Junction_18193	cpx	chr3R:110128-120849	3_Junction_17973_Junction_18142_Junction_18193	0.453582	4.08967	0.0749	0.621276	24	reads okay	FALSE	FALSE	#N/A	4.72843	104	17	10	15	99	110	6	17	8	25	125	24	0.6303	0.4359	0.4762	0.2308	0.2758	0.4	0.3158	0.6296	0.1333	0.2551	0.2319	0.2376
Dn1_1248	3_Junction_17973_Junction_18142_Junction_18193	cpx	chr3R:110128-120849	3_Junction_17973_Junction_18142_Junction_18193	0.5673	15.6057	0.0268	0.0212923	24	reads okay	CYCLE	CYCLE	#N/A	2.22156	47	21	8	38	204	128	8	9	32	62	295	52	0.2848	0.5385	0.381	0.5846	0.5682	0.4655	0.4211	0.3333	0.5333	0.6327	0.5473	0.5149
Dn1_1249	3_Junction_17973_Junction_18142_Junction_18193	cpx	chr3R:110128-120849	3_Junction_17973_Junction_18142_Junction_18193	0.105095	17.4156	0.6072	1	20.5333	reads okay	FALSE	FALSE	#N/A	13.0195	14	1	3	12	56	37	5	1	20	11	119	25	0.0848	0.0256	0.1429	0.1846	0.156	0.1345	0.2632	0.037	0.3333	0.1122	0.2208	0.2475
Dn1_12601	intronretentionright-Junction_13168	nSyb	chr3L:1632454-1633124	intronretentionright-Junction_13168	0.695646	20.7973	0.0009	0.0161336	24	reads okay	CYCLE	CYCLE	#N/A	5.9979	52	3	2	14	53	62	10	4	1	50	80	18	0.5843	0.25	0.1818	0.6364	0.5955	0.5849	0.5882	0.5	0.1429	0.5435	0.6612	0.8571
Dn1_12602	intronretentionright-Junction_13168	nSyb	chr3L:1632454-1633124	intronretentionright-Junction_13168	0.695646	8.79728	0.0009	0.0161336	24	reads okay	CYCLE	CYCLE	#N/A	5.9979	37	9	9	8	36	44	7	4	6	42	41	3	0.4157	0.75	0.8182	0.3636	0.4045	0.4151	0.4118	0.5	0.8571	0.4565	0.3388	0.1429
Dn1_12623	intronretentionright-Junction_13680	CG13936	chr3L:1851418-1851536	intronretentionright-Junction_13680	0.631056	18.5503	0.0052	0.0161336	24	reads okay	CYCLE	CYCLE	mRNA cycles	1.29479	74	254	251	364	410	297	123	340	199	884	594	112	0.9367	0.7697	0.9691	0.9681	0.9927	0.977	0.9389	0.7944	0.8728	0.9199	0.9966	0.9573
Dn1_12624	intronretentionright-Junction_13680	CG13936	chr3L:1851418-1851536	intronretentionright-Junction_13680	0.631056	6.55026	0.0052	0.0161336	24	reads okay	CYCLE	CYCLE	mRNA cycles	67.7353	5	76	8	12	3	7	8	88	29	77	2	5	0.0633	0.2303	0.0309	0.0319	0.0073	0.023	0.0611	0.2056	0.1272	0.0801	0.0034	0.0427
Dn1_12685	intronretentionright-Junction_15729	nAChRbeta1	chr3L:4433459-4433685	intronretentionright-Junction_15729	0.209149	9.94069	0.3535	0.0389891	16	reads okay	FALSE	CYCLE	#N/A	4.33233	25	23	14	15	93	69	3	14	26	22	137	16	0.1894	0.4107	0.4375	0.1974	0.337	0.2805	0.1667	0.3684	0.7222	0.2821	0.3086	0.4444
Dn1_12686	intronretentionright-Junction_15729	nAChRbeta1	chr3L:4433459-4433685	intronretentionright-Junction_15729	0.209149	21.9407	0.3535	0.0389891	16	reads okay	FALSE	CYCLE	#N/A	2.99964	107	33	18	61	183	177	15	24	10	56	307	20	0.8106	0.5893	0.5625	0.8026	0.663	0.7195	0.8333	0.6316	0.2778	0.7179	0.6914	0.5556
Dn1_12765	intronretentionright-Junction_18221	Prosbeta7	chr3R:1183005-1183146	intronretentionright-Junction_18221	0.0685076	11.0233	0.7081	0.0212923	16	reads okay	FALSE	CYCLE	#N/A	1.83217	142	330	36	176	139	104	106	83	61	231	215	90	0.582	0.6168	0.9	0.5285	0.5966	0.6541	0.5327	0.6148	0.9683	0.7264	0.6006	0.9677
Dn1_12766	intronretentionright-Junction_18221	Prosbeta7	chr3R:1183005-1183146	intronretentionright-Junction_18221	0.0685076	23.0233	0.7081	0.0212923	16	reads okay	FALSE	CYCLE	#N/A	14.8738	102	205	4	157	94	55	93	52	2	87	143	3	0.418	0.3832	0.1	0.4715	0.4034	0.3459	0.4673	0.3852	0.0317	0.2736	0.3994	0.0323
Dn1_13165	intronretentionright-Junction_3277	Syt1	chr2L:2787162-2792265	intronretentionright-Junction_3277	0.1816	9.28578	0.3951	0.0301407	16	reads okay	FALSE	CYCLE	#N/A	3.09775	55	37	10	68	94	84	25	16	10	70	120	35	0.4044	0.4405	0.5882	0.5312	0.2404	0.2979	0.3165	0.4211	0.7143	0.4403	0.2454	0.7447
Dn1_13166	intronretentionright-Junction_3277	Syt1	chr2L:2787162-2792265	intronretentionright-Junction_3277	0.1816	21.2858	0.3951	0.0301407	16	reads okay	FALSE	CYCLE	#N/A	2.97532	81	47	7	60	297	198	54	22	4	89	369	12	0.5956	0.5595	0.4118	0.4688	0.7596	0.7021	0.6835	0.5789	0.2857	0.5597	0.7546	0.2553
Dn1_1322	3_Junction_18745_Junction_18748	cpo	chr3R:13763302-13792193	3_Junction_18745_Junction_18748	0.246967	3.82337	0.2844	0.752279	24	reads okay	FALSE	FALSE	#N/A	2.20022	9	7	0	3	23	26	12	3	1	5	20	5	1	0.875	INF	0.75	0.5349	0.6047	0.7059	1	1	0.4545	0.4878	0.625
Dn1_1323	3_Junction_18745_Junction_18748	cpo	chr3R:13763302-13792193	3_Junction_18745_Junction_18748	0.746531	18.5929	0.0078	0.0907868	24	reads okay	CYCLE	FALSE	#N/A	5.455	0	1	0	1	20	17	5	0	0	6	21	3	0	0.125	INF	0.25	0.4651	0.3953	0.2941	0	0	0.5455	0.5122	0.375
Dn1_1326	3_Junction_18762_Junction_18764_Junction_18765	cpo	chr3R:13836296-13838868	3_Junction_18762_Junction_18764_Junction_18765	0.610526	19.9887	0.0175	0.0212923	20	reads okay	CYCLE	CYCLE	#N/A	5.899	26	11	0	11	82	43	5	1	0	42	132	3	0.4727	0.4231	0	0.3929	0.5899	0.4343	0.1515	0.1111	0	0.3889	0.5714	0.5
Dn1_1327	3_Junction_18762_Junction_18764_Junction_18765	cpo	chr3R:13836296-13838868	3_Junction_18762_Junction_18764_Junction_18765	0.173492	10.7138	0.4157	0.23276	16	reads okay	FALSE	FALSE	#N/A	10	23	10	20	16	47	50	27	0	3	64	77	2	0.4182	0.3846	1	0.5714	0.3381	0.5051	0.8182	0	1	0.5926	0.3333	0.3333
Dn1_13323	intronretentionright-Junction_6058	Vha44	chr2R:12213935-12214068	intronretentionright-Junction_6058	0.0359608	12.6913	0.8163	0.0109748	16	reads okay	FALSE	CYCLE	#N/A	2.8916	101	115	11	117	195	232	89	79	67	107	272	88	0.3544	0.4064	0.6111	0.5223	0.4722	0.555	0.3358	0.594	0.971	0.4735	0.4634	0.967
Dn1_13324	intronretentionright-Junction_6058	Vha44	chr2R:12213935-12214068	intronretentionright-Junction_6058	0.0359608	0.691276	0.8163	0.0109748	16	reads okay	FALSE	CYCLE	#N/A	22.9034	184	168	7	107	218	186	176	54	2	119	315	3	0.6456	0.5936	0.3889	0.4777	0.5278	0.445	0.6642	0.406	0.029	0.5265	0.5366	0.033
Dn1_13369	intronretentionright-Junction_7664	MESK2	chr2R:17399682-17403461	intronretentionright-Junction_7664	0.126548	8.88362	0.5181	0.0301407	16	reads okay	FALSE	CYCLE	#N/A	3.9986	3	9	4	4	28	37	4	5	7	5	36	8	0.1429	0.5	0.5714	0.4	0.2857	0.3814	0.1905	0.5	0.4118	0.2381	0.2687	0.5714
Dn1_13370	intronretentionright-Junction_7664	MESK2	chr2R:17399682-17403461	intronretentionright-Junction_7664	0.126548	20.8836	0.5181	0.0301407	16	reads okay	FALSE	CYCLE	#N/A	1.99977	18	9	3	6	70	60	17	5	10	16	98	6	0.8571	0.5	0.4286	0.6	0.7143	0.6186	0.8095	0.5	0.5882	0.7619	0.7313	0.4286
Dn1_1342	3_Junction_18938_Junction_18940	fru	chr3R:14248904-14256552	3_Junction_18938_Junction_18940	0.1424	15.545	0.4997	1	20.5333	FALSE	FALSE	FALSE	#N/A	10	0	1	0	6	8	6	0	0	0	6	20	1	0	1	INF	0.6667	0.3478	0.2609	INF	INF	INF	0.8571	0.3922	0.5
Dn1_1343	3_Junction_18938_Junction_18940	fru	chr3R:14248904-14256552	3_Junction_18938_Junction_18940	0.58664	20.8896	0.0264	0.182464	22.6667	reads okay	CYCLE	FALSE	#N/A	10	1	0	0	3	15	17	0	0	0	1	31	1	1	0	INF	0.3333	0.6522	0.7391	INF	INF	INF	0.1429	0.6078	0.5
Dn1_1354	3_Junction_18968_Junction_18970	CG7694	chr3R:14403306-14411999	3_Junction_18968_Junction_18970	0.0859436	1.81099	0.6485	1	20.5333	reads okay	FALSE	FALSE	#N/A	8.5034	4	6	0	6	14	42	0	8	7	2	14	7	1	1	INF	0.8571	0.5185	1	INF	1	1	0.1176	0.5385	1
Dn1_1355	3_Junction_18968_Junction_18970	CG7694	chr3R:14403306-14411999	3_Junction_18968_Junction_18970	0.526108	15.9078	0.0105	0.425517	22	reads okay	CYCLE	FALSE	#N/A	8.824	0	0	0	1	13	0	0	0	0	15	12	0	0	0	INF	0.1429	0.4815	0	INF	0	0	0.8824	0.4615	0
Dn1_1370	3_Junction_19507_Junction_19508	CG42613	chr3R:14800892-14801178	3_Junction_19507_Junction_19508	0.115546	13.3381	0.6296	0.0535033	16	reads okay	FALSE	FALSE	#N/A	2.5	32	13	4	22	55	48	4	0	15	25	75	12	0.8421	0.9286	1	1	0.7746	0.7619	1	INF	0.9375	0.9615	0.7653	0.4
Dn1_1371	3_Junction_19507_Junction_19508	CG42613	chr3R:14800892-14801178	3_Junction_19507_Junction_19508	0.551224	21.1492	0.0076	0.113556	24	reads okay	CYCLE	FALSE	#N/A	6	6	1	0	0	16	15	0	0	1	1	23	18	0.1579	0.0714	0	0	0.2254	0.2381	0	INF	0.0625	0.0385	0.2347	0.6
Dn1_1386	3_Junction_19649_Junction_19650	plx	chr3R:1533663-1534219	3_Junction_19649_Junction_19650	0.698062	16.4296	0.0075	0.113556	24	reads okay	CYCLE	FALSE	#N/A	10	0	0	0	2	11	4	0	0	0	4	21	0	0	0	INF	0.5	0.5789	0.4	INF	0	0	1	0.6562	0
Dn1_1387	3_Junction_19649_Junction_19650	plx	chr3R:1533663-1534219	3_Junction_19649_Junction_19650	0.194778	3.41376	0.3705	1	20.5333	FALSE	FALSE	FALSE	#N/A	10	1	6	0	2	8	6	0	3	2	0	11	2	1	1	INF	0.5	0.4211	0.6	INF	1	1	0	0.3438	1
Dn1_1419	3_Junction_20031_Junction_20032	Syp	chr3R:16606549-16617465	3_Junction_20031_Junction_20032	0.000946733	8.12644	0.9966	1	20.5333	reads okay	FALSE	FALSE	#N/A	10	1	4	0	12	20	23	6	0	2	15	35	0	1	1	INF	0.9231	0.5128	0.7419	1	INF	1	0.8824	0.625	0
Dn1_1420	3_Junction_20031_Junction_20032	Syp	chr3R:16606549-16617465	3_Junction_20031_Junction_20032	0.552121	20.0072	0.004	0.0212923	24	reads okay	CYCLE	CYCLE	#N/A	10	0	0	0	1	19	8	0	0	0	2	21	4	0	0	INF	0.0769	0.4872	0.2581	0	INF	0	0.1176	0.375	1
Dn1_1485	3_Junction_20562_Junction_20563	Nrx-1	chr3R:18299471-18303800	3_Junction_20562_Junction_20563	0.0352157	8.1715	0.8505	1	20.5333	reads okay	FALSE	FALSE	#N/A	6.25	0	5	0	1	13	1	4	0	2	0	26	0	0	0.625	INF	0.1429	0.3171	0.0667	0.3636	INF	0.5	0	0.3467	0
Dn1_1486	3_Junction_20562_Junction_20563	Nrx-1	chr3R:18299471-18303800	3_Junction_20562_Junction_20563	0.500217	20.0283	0.0455	0.425517	24	reads okay	CYCLE	FALSE	#N/A	2.66667	2	3	0	6	28	14	7	0	2	1	49	3	1	0.375	INF	0.8571	0.6829	0.9333	0.6364	INF	0.5	1	0.6533	1
Dn1_1520	3_Junction_21160_Junction_21161	Rox8	chr3R:19869849-19869917	3_Junction_21160_Junction_21161	0.115689	0.456575	0.7771	0.752279	24	reads okay	FALSE	FALSE	#N/A	1.36491	28	32	0	8	62	55	46	10	10	43	66	7	0.8235	0.9412	INF	0.8	0.7045	0.8209	0.9583	0.9091	0.8333	0.9348	0.7021	0.7778
Dn1_1521	3_Junction_21160_Junction_21161	Rox8	chr3R:19869849-19869917	3_Junction_21160_Junction_21161	0.579694	19.0356	0.0246	0.0535033	24	reads okay	CYCLE	FALSE	#N/A	7.14388	6	2	0	2	26	12	2	1	2	3	28	2	0.1765	0.0588	INF	0.2	0.2955	0.1791	0.0417	0.0909	0.1667	0.0652	0.2979	0.2222
Dn1_1547	3_Junction_21443_Junction_21444	slo	chr3R:20513627-20517180	3_Junction_21443_Junction_21444	0.658296	19.4679	0.014	0.00813893	20	reads okay	CYCLE	CYCLE	#N/A	5.43	24	4	0	13	82	80	4	0	6	11	116	8	0.2264	0.1111	0	0.3421	0.543	0.4878	0.5	0	0.1818	0.3438	0.5421	0.2222
Dn1_1548	3_Junction_21443_Junction_21444	slo	chr3R:20513627-20517180	3_Junction_21443_Junction_21444	0.658296	7.46792	0.014	0.00813893	20	reads okay	CYCLE	CYCLE	#N/A	2.18818	82	32	12	25	69	84	4	1	27	21	98	28	0.7736	0.8889	1	0.6579	0.457	0.5122	0.5	1	0.8182	0.6562	0.4579	0.7778
Dn1_1570	3_Junction_21766_Junction_21767	Ssadh	chr3R:21452367-21452452	3_Junction_21766_Junction_21767	0.0216337	18.1577	0.8969	1	20.5333	reads okay	FALSE	FALSE	#N/A	10	0	5	0	2	13	11	0	0	7	0	23	11	INF	1	INF	0.5	0.4643	0.5238	INF	INF	1	0	0.5227	1
Dn1_1571	3_Junction_21766_Junction_21767	Ssadh	chr3R:21452367-21452452	3_Junction_21766_Junction_21767	0.640301	16.4069	0.0156	0.23276	24	reads okay	CYCLE	FALSE	#N/A	10	0	0	0	2	15	10	0	0	0	4	21	0	INF	0	INF	0.5	0.5357	0.4762	INF	INF	0	1	0.4773	0
Dn1_1604	3_Junction_22124_Junction_22125	RYa-R	chr3R:22882773-22883103	3_Junction_22124_Junction_22125	0.348706	23.3127	0.1496	0.283057	20	reads okay	FALSE	FALSE	#N/A	2.77778	6	5	0	12	19	79	2	0	0	18	24	16	0.5455	1	INF	0.5217	0.5588	0.6991	1	INF	INF	0.36	0.4615	0.5161
Dn1_1605	3_Junction_22124_Junction_22125	RYa-R	chr3R:22882773-22883103	3_Junction_22124_Junction_22125	0.668961	18.2346	0.016	0.23276	22	reads okay	CYCLE	FALSE	#N/A	6.4	5	0	0	11	15	34	0	0	0	32	28	15	0.4545	0	INF	0.4783	0.4412	0.3009	0	INF	INF	0.64	0.5385	0.4839
Dn1_1616	3_Junction_22280_Junction_22281	unc80	chr3R:23489163-23490136	3_Junction_22280_Junction_22281	0.131971	3.22318	0.5369	0.23276	16	reads okay	FALSE	FALSE	#N/A	10	9	4	0	1	12	11	0	2	1	13	20	1	0.6	0.6667	0	0.2	0.3429	0.5	INF	1	0.3333	0.4333	0.3571	0.5
Dn1_1617	3_Junction_22280_Junction_22281	unc80	chr3R:23489163-23490136	3_Junction_22280_Junction_22281	0.566988	14.5526	0.0199	0.14801	24	reads okay	CYCLE	FALSE	#N/A	10	6	2	6	4	23	11	0	0	2	17	36	1	0.4	0.3333	1	0.8	0.6571	0.5	INF	0	0.6667	0.5667	0.6429	0.5
Dn1_182	3_Junction_106_Junction_107	CG5708	chr2L:10225811-10226663	3_Junction_106_Junction_107	0.641915	19.3571	0.0249	0.354287	24	reads okay	CYCLE	FALSE	#N/A	6	1	2	0	7	23	14	0	0	0	0	23	6	0.0526	0.1176	INF	0.4667	0.4259	0.4242	0	0	0	0	0.3966	0.6
Dn1_183	3_Junction_106_Junction_107	CG5708	chr2L:10225811-10226663	3_Junction_106_Junction_107	0.146417	4.66179	0.5125	1	20.5333	reads okay	FALSE	FALSE	#N/A	2.5	18	15	0	8	31	19	5	3	4	14	35	4	0.9474	0.8824	INF	0.5333	0.5741	0.5758	1	1	1	1	0.6034	0.4
Dn1_1850	3_Junction_23191_Junction_23192_Junction_23194_Junction_23195	CG2246	chr3R:26419538-26420538	3_Junction_23191_Junction_23192_Junction_23194_Junction_23195	0.0501278	21.3862	0.7781	0.23276	16	FALSE	FALSE	FALSE	#N/A	5	13	1	0	6	6	1	7	1	0	8	8	3	0.3514	0.3333	0	0.5	0.2	0.0588	0.3889	0.125	0	0.3636	0.1905	0.3333
Dn1_1851	3_Junction_23191_Junction_23192_Junction_23194_Junction_23195	CG2246	chr3R:26419538-26420538	3_Junction_23191_Junction_23192_Junction_23194_Junction_23195	0.0850407	21.697	0.6551	1	20.5333	reads okay	FALSE	FALSE	#N/A	3.75	11	0	0	2	5	5	5	3	0	8	12	0	0.2973	0	0	0.1667	0.1667	0.2941	0.2778	0.375	0	0.3636	0.2857	0
Dn1_1852	3_Junction_23191_Junction_23192_Junction_23194_Junction_23195	CG2246	chr3R:26419538-26420538	3_Junction_23191_Junction_23192_Junction_23194_Junction_23195	0.652544	21.9402	0.0047	0.0389891	24	reads okay	CYCLE	CYCLE	#N/A	6.667	8	1	0	3	13	6	6	2	0	2	16	6	0.2162	0.3333	0	0.25	0.4333	0.3529	0.3333	0.25	0	0.0909	0.381	0.6667
Dn1_1859	3_Junction_23326_Junction_23327	CG1607	chr3R:27215920-27216309	3_Junction_23326_Junction_23327	0.639096	2.6047	0.0092	0.0535033	24	reads okay	CYCLE	FALSE	mRNA cycles	10	20	7	0	0	22	51	17	11	4	7	36	11	0.6897	0.5	INF	0	0.275	0.4636	0.85	1	0.5	0.3182	0.3243	0.5789
Dn1_1860	3_Junction_23326_Junction_23327	CG1607	chr3R:27215920-27216309	3_Junction_23326_Junction_23327	0.572086	16.6122	0.0268	0.0907868	24	reads okay	CYCLE	FALSE	mRNA cycles	10	9	7	0	25	58	59	3	0	4	15	75	8	0.3103	0.5	INF	1	0.725	0.5364	0.15	0	0.5	0.6818	0.6757	0.4211
Dn1_1925	3_Junction_23963_Junction_23965	pyd	chr3R:4661232-4664112	3_Junction_23963_Junction_23965	0.0644153	14.0895	0.73	0.621276	16	FALSE	FALSE	FALSE	mRNA cycles	10	9	5	0	3	2	0	0	0	0	6	7	0	1	0.625	INF	1	0.1818	0	INF	INF	INF	0.8571	0.4667	0
Dn1_1926	3_Junction_23963_Junction_23965	pyd	chr3R:4661232-4664112	3_Junction_23963_Junction_23965	0.605242	20.5429	0.0193	0.23276	24	FALSE	FALSE	FALSE	mRNA cycles	10	0	3	0	0	9	13	0	0	0	1	8	1	0	0.375	INF	0	0.8182	1	INF	INF	INF	0.1429	0.5333	1
Dn1_1935	3_Junction_24161_Junction_24164_Junction_24168	ps	chr3R:5245769-5270764	3_Junction_24161_Junction_24164_Junction_24168	0.635442	19.4051	0.0002	0.182464	24	reads okay	CYCLE	FALSE	#N/A	3.5	0	0	0	0	14	3	0	0	0	0	17	1	0	0	INF	0	0.35	0.1	0	0	0	0	0.2615	0.25
Dn1_1936	3_Junction_24161_Junction_24164_Junction_24168	ps	chr3R:5245769-5270764	3_Junction_24161_Junction_24164_Junction_24168	0.00316638	7.83674	0.9839	1	20.5333	reads okay	FALSE	FALSE	#N/A	10	4	3	0	1	19	17	0	2	0	6	32	0	1	0.75	INF	1	0.475	0.5667	0	1	0	0.6667	0.4923	0
Dn1_1937	3_Junction_24161_Junction_24164_Junction_24168	ps	chr3R:5245769-5270764	3_Junction_24161_Junction_24164_Junction_24168	0.0470484	0.700675	0.8019	1	20.5333	FALSE	FALSE	FALSE	#N/A	10	0	1	0	0	7	10	6	0	3	3	16	3	0	0.25	INF	0	0.175	0.3333	1	0	1	0.3333	0.2462	0.75
Dn1_1950	3_Junction_24242_Junction_24243	MBD-like	chr3R:5385753-5386643	3_Junction_24242_Junction_24243	0.660415	0.978452	0.0118	0.0535033	20	reads okay	CYCLE	FALSE	#N/A	10	14	7	0	0	6	2	12	1	0	7	10	3	0.5833	0.4667	0	0	0.25	0.6667	0.7059	1	0	0.2917	0.2778	1
Dn1_1951	3_Junction_24242_Junction_24243	MBD-like	chr3R:5385753-5386643	3_Junction_24242_Junction_24243	0.660415	12.9785	0.0118	0.0535033	20	reads okay	CYCLE	FALSE	#N/A	10	10	8	15	11	18	1	5	0	3	17	26	0	0.4167	0.5333	1	1	0.75	0.3333	0.2941	0	1	0.7083	0.7222	0
Dn1_1957	3_Junction_24326_Junction_24327_Junction_24328	FoxP	chr3R:5551897-5553710	3_Junction_24326_Junction_24327_Junction_24328	0.0856639	0.1729	0.6647	0.0389891	16	reads okay	FALSE	CYCLE	#N/A	5.333	20	8	0	8	19	15	2	7	4	11	22	20	0.1739	0.5333	0	0.1481	0.3455	0.2381	0.1538	0.4375	0.1538	0.2444	0.3385	0.3922
Dn1_1958	3_Junction_24326_Junction_24327_Junction_24328	FoxP	chr3R:5551897-5553710	3_Junction_24326_Junction_24327_Junction_24328	0.158401	4.2852	0.4694	1	20.5333	reads okay	FALSE	FALSE	#N/A	3.0003	81	7	24	18	30	41	11	9	15	24	33	27	0.7043	0.4667	1	0.3333	0.5455	0.6508	0.8462	0.5625	0.5769	0.5333	0.5077	0.5294
Dn1_1959	3_Junction_24326_Junction_24327_Junction_24328	FoxP	chr3R:5551897-5553710	3_Junction_24326_Junction_24327_Junction_24328	0.432379	14.7568	0.054	0.182464	20	FALSE	FALSE	FALSE	#N/A	5.185	14	0	0	28	6	7	0	0	7	10	10	4	0.1217	0	0	0.5185	0.1091	0.1111	0	0	0.2692	0.2222	0.1538	0.0784
Dn1_2001	3_Junction_24731_Junction_24732_Junction_24733_Junction_24734	SelR	chr3R:6689547-6692249	3_Junction_24731_Junction_24732_Junction_24733_Junction_24734	0.0755276	11.4815	0.7027	1	20.5333	FALSE	FALSE	FALSE	#N/A	2.857	2	2	0	7	7	2	2	2	3	13	10	5	0.05	0.069	0	0.2059	0.0787	0.0204	0.08	0.2857	0.1429	0.2	0.084	0.1786
Dn1_2002	3_Junction_24731_Junction_24732_Junction_24733_Junction_24734	SelR	chr3R:6689547-6692249	3_Junction_24731_Junction_24732_Junction_24733_Junction_24734	0.138772	1.42607	0.5206	0.0389891	16	reads okay	FALSE	CYCLE	#N/A	5.714	7	11	0	4	22	17	2	4	0	8	31	10	0.175	0.3793	0	0.1176	0.2472	0.1735	0.08	0.5714	0	0.1231	0.2605	0.3571
Dn1_2003	3_Junction_24731_Junction_24732_Junction_24733_Junction_24734	SelR	chr3R:6689547-6692249	3_Junction_24731_Junction_24732_Junction_24733_Junction_24734	0.238233	22.2862	0.2963	1	20.5333	reads okay	FALSE	FALSE	#N/A	3.6	4	1	0	0	18	33	9	0	4	8	15	1	0.1	0.0345	0	0	0.2022	0.3367	0.36	0	0.1905	0.1231	0.1261	0.0357
Dn1_2004	3_Junction_24731_Junction_24732_Junction_24733_Junction_24734	SelR	chr3R:6689547-6692249	3_Junction_24731_Junction_24732_Junction_24733_Junction_24734	0.199115	11.9713	0.3995	0.113556	16	reads okay	FALSE	FALSE	#N/A	6.9979	27	15	6	23	42	46	12	1	14	36	63	12	0.675	0.5172	1	0.6765	0.4719	0.4694	0.48	0.1429	0.6667	0.5538	0.5294	0.4286
Dn1_2083	3_Junction_25448_Junction_25449	B52	chr3R:9488773-9491173	3_Junction_25448_Junction_25449	0.526454	10.2475	0.0215	0.0389891	22.6667	reads okay	CYCLE	CYCLE	#N/A	10	26	18	7	25	46	34	0	12	16	24	47	16	0.4643	0.75	1	0.5	0.4259	0.2698	0	0.4444	0.5333	0.5333	0.3092	0.3137
Dn1_2084	3_Junction_25448_Junction_25449	B52	chr3R:9488773-9491173	3_Junction_25448_Junction_25449	0.526454	22.2475	0.0215	0.0389891	22.6667	reads okay	CYCLE	CYCLE	#N/A	10	30	6	0	25	62	92	7	15	14	21	105	35	0.5357	0.25	0	0.5	0.5741	0.7302	1	0.5556	0.4667	0.4667	0.6908	0.6863
Dn1_2109	3_Junction_25663_Junction_25665_Junction_25668_Junction_25669	CaMKII	chr4:1059060-1064092	3_Junction_25663_Junction_25665_Junction_25668_Junction_25669	0.227453	23.9064	0.3206	0.621276	16	reads okay	FALSE	FALSE	#N/A	7.61634	12	12	0	1	79	41	5	4	5	11	107	12	0.9231	0.4615	INF	0.1429	0.5032	0.3628	0.625	0.1212	0.625	0.4783	0.4672	0.4615
Dn1_2110	3_Junction_25663_Junction_25665_Junction_25668_Junction_25669	CaMKII	chr4:1059060-1064092	3_Junction_25663_Junction_25665_Junction_25668_Junction_25669	0.523286	18.9896	0.0435	0.621276	24	reads okay	CYCLE	FALSE	#N/A	3.363	0	5	0	1	43	38	0	2	0	3	70	4	0	0.1923	INF	0.1429	0.2739	0.3363	0	0.0606	0	0.1304	0.3057	0.1538
Dn1_2206	3_Junction_25980_Junction_25981	PMCA	chr4:373216-374975	3_Junction_25980_Junction_25981	0.633442	22.1217	0.0186	0.0680175	24	reads okay	CYCLE	FALSE	#N/A	17.0022	11	8	0	1	42	41	2	1	7	3	60	14	0.6875	0.4444	INF	0.0625	0.5676	0.7736	0.4	0.0455	0.4667	0.25	0.6316	0.7368
Dn1_2207	3_Junction_25980_Junction_25981	PMCA	chr4:373216-374975	3_Junction_25980_Junction_25981	0.113414	10.2761	0.5754	1	20.5333	reads okay	FALSE	FALSE	#N/A	4.21599	5	10	0	15	32	12	3	21	8	9	35	5	0.3125	0.5556	INF	0.9375	0.4324	0.2264	0.6	0.9545	0.5333	0.75	0.3684	0.2632
Dn1_225	3_Junction_11409_Junction_11410	CG6191	chr2R:9469371-9470302	3_Junction_11409_Junction_11410	0.582597	21.7901	0.0005	0.00236091	22	reads okay	CYCLE	CYCLE	#N/A	8.169	45	28	3	25	89	58	4	12	0	18	148	20	0.7895	0.7	0.375	0.7143	0.7295	0.8169	0.8	0.4615	0	0.6429	0.759	0.7692
Dn1_226	3_Junction_11409_Junction_11410	CG6191	chr2R:9469371-9470302	3_Junction_11409_Junction_11410	0.582597	9.79007	0.0005	0.00236091	22	reads okay	CYCLE	CYCLE	#N/A	5.4615	12	12	5	10	33	13	1	14	4	10	47	6	0.2105	0.3	0.625	0.2857	0.2705	0.1831	0.2	0.5385	1	0.3571	0.241	0.2308
Dn1_2492	3_Junction_26697_Junction_26699	Hk	chrX:10149623-10152909	3_Junction_26697_Junction_26699	0.55732	8.8006	0.0346	0.0389891	24	reads okay	CYCLE	CYCLE	#N/A	1.78955	31	27	21	32	34	29	16	22	29	37	37	19	0.775	0.7941	1	0.9143	0.6538	0.5918	0.7273	0.9167	0.6591	0.7551	0.5781	0.5588
Dn1_2493	3_Junction_26697_Junction_26699	Hk	chrX:10149623-10152909	3_Junction_26697_Junction_26699	0.55732	20.8006	0.0346	0.0389891	24	reads okay	CYCLE	CYCLE	#N/A	4.412	9	7	0	3	18	20	6	2	15	12	27	15	0.225	0.2059	0	0.0857	0.3462	0.4082	0.2727	0.0833	0.3409	0.2449	0.4219	0.4412
Dn1_2543	3_Junction_27073_Junction_27074	dlg1	chrX:11276013-11281803	3_Junction_27073_Junction_27074	0.509395	21.7061	0.0453	0.354287	24	reads okay	CYCLE	FALSE	#N/A	10	3	3	0	4	6	21	0	0	0	0	14	1	0.5	0.6	INF	0.4	0.3529	0.9545	INF	INF	0	0	0.5385	1
Dn1_2544	3_Junction_27073_Junction_27074	dlg1	chrX:11276013-11281803	3_Junction_27073_Junction_27074	0.393669	13.5806	0.1136	0.752279	20	reads okay	FALSE	FALSE	#N/A	10	3	2	0	6	11	1	0	0	3	1	12	0	0.5	0.4	INF	0.6	0.6471	0.0455	INF	INF	1	1	0.4615	0
Dn1_2575	3_Junction_2722_Junction_2723	CG9328	chr2L:20798514-20813154	3_Junction_2722_Junction_2723	0.502652	5.81663	0.0465	0.523397	24	reads okay	CYCLE	FALSE	#N/A	3.12448	25	14	3	8	78	41	11	5	17	20	101	10	0.463	0.5185	0.75	0.2667	0.4615	0.3868	0.7333	0.8333	0.5484	0.3175	0.4353	0.3571
Dn1_2576	3_Junction_2722_Junction_2723	CG9328	chr2L:20798514-20813154	3_Junction_2722_Junction_2723	0.502652	17.8166	0.0465	0.523397	24	reads okay	CYCLE	FALSE	#N/A	4.39892	29	13	1	22	91	65	4	1	14	43	131	18	0.537	0.4815	0.25	0.7333	0.5385	0.6132	0.2667	0.1667	0.4516	0.6825	0.5647	0.6429
Dn1_2581	3_Junction_27261_Junction_27263_Junction_27269_Junction_27270	cac	chrX:11834075-11842659	3_Junction_27261_Junction_27263_Junction_27269_Junction_27270	0.303331	14.3019	0.1914	0.752279	24	reads okay	FALSE	FALSE	#N/A	10	0	0	3	9	17	36	0	0	0	6	31	0	0	0	1	0.6	0.2615	0.5373	0	0	0	0.3158	0.3333	0
Dn1_2582	3_Junction_27261_Junction_27263_Junction_27269_Junction_27270	cac	chrX:11834075-11842659	3_Junction_27261_Junction_27263_Junction_27269_Junction_27270	0.0755644	5.93528	0.6859	1	20.5333	reads okay	FALSE	FALSE	#N/A	10	7	5	0	3	15	6	17	0	1	13	13	4	0.5	0.7143	0	0.2	0.2308	0.0896	0.8095	0	1	0.6842	0.1398	0.5
Dn1_2583	3_Junction_27261_Junction_27263_Junction_27269_Junction_27270	cac	chrX:11834075-11842659	3_Junction_27261_Junction_27263_Junction_27269_Junction_27270	0.192798	3.74677	0.4097	0.621276	16	reads okay	FALSE	FALSE	#N/A	10	5	2	0	3	13	19	4	1	0	0	28	0	0.3571	0.2857	0	0.2	0.2	0.2836	0.1905	1	0	0	0.3011	0
Dn1_2584	3_Junction_27261_Junction_27263_Junction_27269_Junction_27270	cac	chrX:11834075-11842659	3_Junction_27261_Junction_27263_Junction_27269_Junction_27270	0.55942	20.6646	0.0121	0.182464	24	reads okay	CYCLE	FALSE	#N/A	5	2	0	0	0	20	6	0	0	0	0	21	4	0.1429	0	0	0	0.3077	0.0896	0	0	0	0	0.2258	0.5
Dn1_264	3_Junction_11580_Junction_11723	CG17684	chr2RHet:862303-1004929	3_Junction_11580_Junction_11723	0.116283	6.53428	0.5486	1	20.5333	FALSE	FALSE	FALSE	#N/A	6.50195	8	1	0	0	2	2	0	1	3	8	7	13	0.4706	1	INF	INF	0.1538	0.3333	INF	1	0.75	1	0.2917	0.7647
Dn1_265	3_Junction_11580_Junction_11723	CG17684	chr2RHet:862303-1004929	3_Junction_11580_Junction_11723	0.513227	20.1561	0.0499	0.354287	24	reads okay	CYCLE	FALSE	#N/A	8.462	9	0	0	0	11	4	0	0	1	0	17	4	0.5294	0	INF	INF	0.8462	0.6667	INF	0	0.25	0	0.7083	0.2353
Dn1_2796	3_Junction_28789_Junction_28790	CG33178	chrX:14977074-14977288	3_Junction_28789_Junction_28790	0.0941285	20.8811	0.7754	0.752279	16	reads okay	FALSE	FALSE	#N/A	1.79986	70	247	0	231	129	38	35	88	13	90	229	98	0.7778	0.8373	INF	0.8684	0.8487	1	0.5556	0.9565	1	0.8036	0.8327	0.875
Dn1_2797	3_Junction_28789_Junction_28790	CG33178	chrX:14977074-14977288	3_Junction_28789_Junction_28790	0.155965	23.9467	0.4845	0.00813893	16	reads okay	FALSE	CYCLE	#N/A	4.444	20	48	0	35	23	0	28	4	0	22	46	14	0.2222	0.1627	INF	0.1316	0.1513	0	0.4444	0.0435	0	0.1964	0.1673	0.125
Dn1_2798	3_Junction_28802_Junction_28803	Rab3-GEF	chrX:14989246-14991487	3_Junction_28802_Junction_28803	0.243487	9.26309	0.2775	0.621276	20	FALSE	FALSE	FALSE	#N/A	10	3	6	0	2	4	9	0	2	2	7	0	1	0.5	0.5455	INF	1	0.16	0.4737	0	1	1	0.5385	0	0.2
Dn1_2799	3_Junction_28802_Junction_28803	Rab3-GEF	chrX:14989246-14991487	3_Junction_28802_Junction_28803	0.642291	21.5499	0.0167	0.0109748	20	reads okay	CYCLE	CYCLE	#N/A	10	3	5	0	0	21	10	1	0	0	6	30	4	0.5	0.4545	INF	0	0.84	0.5263	1	0	0	0.4615	1	0.8
Dn1_2958	3_Junction_29532_Junction_29533	Arp2	chrX:16444498-16446371	3_Junction_29532_Junction_29533	0.000982233	14.1867	0.9963	1	20.5333	reads okay	FALSE	FALSE	#N/A	4.363	0	5	5	8	11	12	5	0	0	6	16	5	INF	0.7143	1	0.8889	0.2292	0.48	1	INF	INF	0.4	0.2963	0.7143
Dn1_2959	3_Junction_29532_Junction_29533	Arp2	chrX:16444498-16446371	3_Junction_29532_Junction_29533	0.632781	18.1606	0.0202	0.14801	24	reads okay	CYCLE	FALSE	#N/A	7.708	0	2	0	1	37	13	0	0	0	9	38	2	INF	0.2857	0	0.1111	0.7708	0.52	0	INF	INF	0.6	0.7037	0.2857
Dn1_3	3_Junction_10082_Junction_10083	Camta	chr2R:5362709-5363604	3_Junction_10082_Junction_10083	0.753177	19.7633	0.0022	0.113556	24	reads okay	CYCLE	FALSE	#N/A	7.5	0	0	0	0	31	19	0	0	0	1	47	3	0	0	INF	0	0.6458	0.5	INF	0	INF	0.1	0.6812	0.75
Dn1_3067	3_Junction_29939_Junction_29952	Sh	chrX:17824809-17839250	3_Junction_29939_Junction_29952	0.666139	20.1338	0.0122	0.283057	24	reads okay	CYCLE	FALSE	#N/A	7.193	1	2	0	1	20	17	0	0	0	0	41	3	0.2	0.2857	INF	0.2	0.5405	0.5	0	INF	INF	0	0.7193	0.6
Dn1_3068	3_Junction_29939_Junction_29952	Sh	chrX:17824809-17839250	3_Junction_29939_Junction_29952	0.0905231	21.9062	0.6288	0.425517	16	reads okay	FALSE	FALSE	#N/A	3.56252	4	5	0	4	17	17	2	0	0	6	16	2	0.8	0.7143	INF	0.8	0.4595	0.5	1	INF	INF	1	0.2807	0.4
Dn1_3071	3_Junction_29949_Junction_29950	Sh	chrX:17835190-17836813	3_Junction_29949_Junction_29950	0.505531	13.058	0.0362	0.113556	16	reads okay	CYCLE	FALSE	#N/A	10	13	5	5	12	23	55	0	3	6	10	37	16	0.4194	0.2941	1	0.7059	0.3966	0.625	0	0.5	0.6	0.9091	0.4805	0.4571
Dn1_3072	3_Junction_29949_Junction_29950	Sh	chrX:17835190-17836813	3_Junction_29949_Junction_29950	0.505531	1.05795	0.0362	0.113556	16	reads okay	CYCLE	FALSE	#N/A	10	18	12	0	5	35	33	3	3	4	1	40	19	0.5806	0.7059	0	0.2941	0.6034	0.375	1	0.5	0.4	0.0909	0.5195	0.5429
Dn1_3212	3_Junction_30702_Junction_30706	CoVIb	chrX:19635198-19637475	3_Junction_30702_Junction_30706	0.436971	12.7459	0.0607	0.425517	24	FALSE	FALSE	FALSE	#N/A	10	0	0	0	7	7	2	0	1	1	5	4	0	0	INF	INF	1	0.3684	0.0667	0	0.3333	1	0.3125	0.16	0
Dn1_3213	3_Junction_30702_Junction_30706	CoVIb	chrX:19635198-19637475	3_Junction_30702_Junction_30706	0.730832	22.5572	0.0066	0.0161336	20	reads okay	CYCLE	CYCLE	#N/A	10	1	0	0	0	12	28	4	2	0	11	21	6	1	INF	INF	0	0.6316	0.9333	1	0.6667	0	0.6875	0.84	1
Dn1_3985	3_Junction_31279_Junction_31281_Junction_31282	Pdfr	chrX:2470417-2471624	3_Junction_31279_Junction_31281_Junction_31282	0.545162	23.3197	0.0111	0.0535033	16	reads okay	CYCLE	FALSE	#N/A	12.0966	19	35	1	32	149	106	31	51	2	117	203	27	0.5758	0.5072	0.0476	0.32	0.5017	0.4435	0.5741	0.505	0.1111	0.4398	0.4963	0.5
Dn1_3986	3_Junction_31279_Junction_31281_Junction_31282	Pdfr	chrX:2470417-2471624	3_Junction_31279_Junction_31281_Junction_31282	0.0968048	5.71171	0.6378	1	20.5333	reads okay	FALSE	FALSE	#N/A	2.222	6	8	0	5	21	20	4	3	4	14	21	0	0.1818	0.1159	0	0.05	0.0707	0.0837	0.0741	0.0297	0.2222	0.0526	0.0513	0
Dn1_3987	3_Junction_31279_Junction_31281_Junction_31282	Pdfr	chrX:2470417-2471624	3_Junction_31279_Junction_31281_Junction_31282	0.488435	11.949	0.0268	0.00813893	16	reads okay	FALSE	CYCLE	#N/A	3.92904	8	26	20	63	127	113	19	47	12	135	185	27	0.2424	0.3768	0.9524	0.63	0.4276	0.4728	0.3519	0.4653	0.6667	0.5075	0.4523	0.5
Dn1_4	3_Junction_10082_Junction_10083	Camta	chr2R:5362709-5363604	3_Junction_10082_Junction_10083	0.0222079	6.96722	0.8929	1	20.5333	reads okay	FALSE	FALSE	#N/A	4	6	3	0	4	17	19	0	4	0	9	22	1	1	1	INF	1	0.3542	0.5	INF	1	INF	0.9	0.3188	0.25
Dn1_4104	3_Junction_32370_Junction_32372	dnc	chrX:3150244-3152642	3_Junction_32370_Junction_32372	0.545231	3.96299	0.0433	0.23276	24	reads okay	CYCLE	FALSE	#N/A	2.05888	1	7	4	2	17	12	1	1	4	10	17	8	1	0.6364	1	0.5	0.5312	1	1	1	0.8	0.5882	0.4857	0.6667
Dn1_4105	3_Junction_32370_Junction_32372	dnc	chrX:3150244-3152642	3_Junction_32370_Junction_32372	0.545231	15.963	0.0433	0.23276	24	reads okay	CYCLE	FALSE	#N/A	5.143	0	4	0	2	15	0	0	0	1	7	18	4	0	0.3636	0	0.5	0.4688	0	0	0	0.2	0.4118	0.5143	0.3333
Dn1_425	3_Junction_12534_Junction_12536_Junction_12537	bru-3	chr3L:13577371-13631615	3_Junction_12534_Junction_12536_Junction_12537	0.0717908	20.0925	0.7824	1	20.5333	reads okay	FALSE	FALSE	#N/A	5.667	10	17	0	9	27	26	8	2	4	6	53	14	0.3226	0.5667	0	0.45	0.3293	0.4062	0.3636	0.2857	0.5	0.5	0.4454	0.56
Dn1_426	3_Junction_12534_Junction_12536_Junction_12537	bru-3	chr3L:13577371-13631615	3_Junction_12534_Junction_12536_Junction_12537	0.330696	9.11315	0.1417	0.883281	24	reads okay	FALSE	FALSE	#N/A	3.57143	13	10	7	10	30	25	11	5	3	6	42	7	0.4194	0.3333	1	0.5	0.3659	0.3906	0.5	0.7143	0.375	0.5	0.3529	0.28
Dn1_427	3_Junction_12534_Junction_12536_Junction_12537	bru-3	chr3L:13577371-13631615	3_Junction_12534_Junction_12536_Junction_12537	0.54326	21.6661	0.0374	0.113556	20	reads okay	CYCLE	FALSE	#N/A	3.049	8	3	0	1	25	13	3	0	1	0	24	4	0.2581	0.1	0	0.05	0.3049	0.2031	0.1364	0	0.125	0	0.2017	0.16
Dn1_432	3_Junction_12572_Junction_12574_Junction_12575	dysc	chr3L:13866366-13870722	3_Junction_12572_Junction_12574_Junction_12575	0.286752	19.1002	0.2104	1	20.5333	FALSE	FALSE	FALSE	#N/A	4.545	4	0	0	5	9	6	0	0	2	0	6	7	0.3077	INF	INF	0.4545	0.3	0.24	INF	0	0.2222	0	0.1333	0.3684
Dn1_433	3_Junction_12572_Junction_12574_Junction_12575	dysc	chr3L:13866366-13870722	3_Junction_12572_Junction_12574_Junction_12575	0.648978	19.4297	0.0159	0.0535033	24	reads okay	CYCLE	FALSE	#N/A	4.68047	4	0	0	5	12	13	0	1	1	2	15	9	0.3077	INF	INF	0.4545	0.4	0.52	INF	0.1667	0.1111	0.2	0.3333	0.4737
Dn1_434	3_Junction_12572_Junction_12574_Junction_12575	dysc	chr3L:13866366-13870722	3_Junction_12572_Junction_12574_Junction_12575	0.0734662	12.6688	0.6849	1	20.5333	FALSE	FALSE	FALSE	#N/A	9.16722	5	0	0	1	9	6	0	5	6	8	24	3	0.3846	INF	INF	0.0909	0.3	0.24	INF	0.8333	0.6667	0.8	0.5333	0.1579
Dn1_44	3_Junction_10524_Junction_10528_Junction_10534_Junction_10538_Junction_10542_Junction_10544_Junction_10545_Junction_10547	lola	chr2R:6376648-6419542	3_Junction_10524_Junction_10528_Junction_10534_Junction_10538_Junction_10542_Junction_10544_Junction_10545_Junction_10547	0.600052	7.83198	0.0243	1	20.5333	reads okay	CYCLE	FALSE	#N/A	1.84845	80	56	9	35	75	116	59	26	10	66	123	19	0.678	0.6512	0.75	0.7447	0.4491	0.5	0.7867	0.7027	0.6667	0.6804	0.4256	0.4318
Dn1_45	3_Junction_10524_Junction_10528_Junction_10534_Junction_10538_Junction_10542_Junction_10544_Junction_10545_Junction_10547	lola	chr2R:6376648-6419542	3_Junction_10524_Junction_10528_Junction_10534_Junction_10538_Junction_10542_Junction_10544_Junction_10545_Junction_10547	0.0838144	22.2863	0.6559	1	20.5333	reads okay	FALSE	FALSE	#N/A	1.818	6	3	1	1	22	17	6	6	2	0	47	8	0.0508	0.0349	0.0833	0.0213	0.1317	0.0733	0.08	0.1622	0.1333	0	0.1626	0.1818
Dn1_46	3_Junction_10524_Junction_10528_Junction_10534_Junction_10538_Junction_10542_Junction_10544_Junction_10545_Junction_10547	lola	chr2R:6376648-6419542	3_Junction_10524_Junction_10528_Junction_10534_Junction_10538_Junction_10542_Junction_10544_Junction_10545_Junction_10547	0.100171	11.5136	0.614	1	20.5333	reads okay	FALSE	FALSE	#N/A	0.814	3	7	0	3	6	12	3	1	1	6	12	0	0.0254	0.0814	0	0.0638	0.0359	0.0517	0.04	0.027	0.0667	0.0619	0.0415	0
Dn1_47	3_Junction_10524_Junction_10528_Junction_10534_Junction_10538_Junction_10542_Junction_10544_Junction_10545_Junction_10547	lola	chr2R:6376648-6419542	3_Junction_10524_Junction_10528_Junction_10534_Junction_10538_Junction_10542_Junction_10544_Junction_10545_Junction_10547	0.691815	19.7137	0.0073	0.113556	24	FALSE	FALSE	FALSE	#N/A	0.415	2	1	0	0	6	8	0	0	0	2	12	1	0.0169	0.0116	0	0	0.0359	0.0345	0	0	0	0.0206	0.0415	0.0227
Dn1_472	3_Junction_12941_Junction_12942	CG7879	chr3L:1564280-1568416	3_Junction_12941_Junction_12942	0.409474	15.4535	0.0936	0.621276	20	reads okay	FALSE	FALSE	#N/A	6.56053	2	3	0	18	26	6	5	10	4	15	33	5	0.2	0.2143	INF	0.75	0.5652	0.1429	0.3846	0.4348	0.2857	0.9375	0.6111	0.2273
Dn1_473	3_Junction_12941_Junction_12942	CG7879	chr3L:1564280-1568416	3_Junction_12941_Junction_12942	0.602135	1.3037	0.0193	0.0389891	20	reads okay	CYCLE	CYCLE	#N/A	13.7136	8	11	0	6	20	36	8	13	10	1	21	17	0.8	0.7857	INF	0.25	0.4348	0.8571	0.6154	0.5652	0.7143	0.0625	0.3889	0.7727
Dn1_4751	3_Junction_34851_Junction_34856_Junction_34859	ZAP3	chrX:9967444-9972517	3_Junction_34851_Junction_34856_Junction_34859	0.0133292	13.2437	0.9513	1	20.5333	FALSE	FALSE	FALSE	#N/A	10	1	5	0	0	9	3	0	0	1	1	13	2	0.0909	0.3846	INF	0	0.3103	0.125	0	0	1	0.2	0.2167	0.6667
Dn1_4752	3_Junction_34851_Junction_34856_Junction_34859	ZAP3	chrX:9967444-9972517	3_Junction_34851_Junction_34856_Junction_34859	0.564366	17.4946	0.0201	0.354287	24	reads okay	CYCLE	FALSE	#N/A	4.833	0	2	0	1	12	5	0	0	0	1	29	0	0	0.1538	INF	0.1667	0.4138	0.2083	0	0	0	0.2	0.4833	0
Dn1_4753	3_Junction_34851_Junction_34856_Junction_34859	ZAP3	chrX:9967444-9972517	3_Junction_34851_Junction_34856_Junction_34859	0.236733	1.73367	0.2972	1	20.5333	reads okay	FALSE	FALSE	#N/A	10	10	6	0	5	8	16	7	1	0	3	18	1	0.9091	0.4615	INF	0.8333	0.2759	0.6667	1	1	0	0.6	0.3	0.3333
Dn1_4763	3_Junction_3573_Junction_3574	CG43707	chr2L:3759154-3760066	3_Junction_3573_Junction_3574	0.180074	10.0556	0.4344	0.354287	20	reads okay	FALSE	FALSE	#N/A	1.71057	25	18	13	8	49	38	0	22	4	13	71	6	0.8929	0.9474	1	0.6667	0.6533	0.5846	INF	1	1	0.8125	0.7245	1
Dn1_4764	3_Junction_3573_Junction_3574	CG43707	chr2L:3759154-3760066	3_Junction_3573_Junction_3574	0.570103	18.0057	0.0334	0.523397	24	reads okay	CYCLE	FALSE	#N/A	4.154	3	1	0	4	26	27	0	0	0	3	27	0	0.1071	0.0526	0	0.3333	0.3467	0.4154	INF	0	0	0.1875	0.2755	0
Dn1_4771	3_Junction_3619_Junction_3620_Junction_3621	fred	chr2L:3911336-3916779	3_Junction_3619_Junction_3620_Junction_3621	0.573712	9.19205	0.0206	0.0680175	24	reads okay	CYCLE	FALSE	#N/A	5.9988	13	15	11	29	30	66	15	14	4	31	48	1	0.65	0.6522	0.6875	0.6905	0.4167	0.6408	0.3488	0.875	1	0.62	0.4615	0.1667
Dn1_4772	3_Junction_3619_Junction_3620_Junction_3621	fred	chr2L:3911336-3916779	3_Junction_3619_Junction_3620_Junction_3621	0.477141	21.3831	0.0475	0.23276	24	reads okay	FALSE	FALSE	#N/A	8.333	5	5	5	9	34	32	28	2	0	19	43	5	0.25	0.2174	0.3125	0.2143	0.4722	0.3107	0.6512	0.125	0	0.38	0.4135	0.8333
Dn1_4773	3_Junction_3619_Junction_3620_Junction_3621	fred	chr2L:3911336-3916779	3_Junction_3619_Junction_3620_Junction_3621	0.0867279	19.3263	0.6456	1	20.5333	FALSE	FALSE	FALSE	#N/A	1.304	2	3	0	4	8	5	0	0	0	0	13	0	0.1	0.1304	0	0.0952	0.1111	0.0485	0	0	0	0	0.125	0
Dn1_48	3_Junction_10524_Junction_10528_Junction_10534_Junction_10538_Junction_10542_Junction_10544_Junction_10545_Junction_10547	lola	chr2R:6376648-6419542	3_Junction_10524_Junction_10528_Junction_10534_Junction_10538_Junction_10542_Junction_10544_Junction_10545_Junction_10547	0.591597	22.0334	0.0153	0.14801	24	FALSE	FALSE	FALSE	#N/A	0.909	7	1	0	0	4	9	0	0	0	0	13	4	0.0593	0.0116	0	0	0.024	0.0388	0	0	0	0	0.045	0.0909
Dn1_4812	3_Junction_4112_Junction_4113	TrissinR	chr2L:5851826-5852991	3_Junction_4112_Junction_4113	0.695295	17.1508	0.0118	0.283057	24	reads okay	CYCLE	FALSE	#N/A	6.207	0	0	0	4	25	10	0	0	0	18	20	0	0	0	INF	0.3077	0.5952	0.4762	INF	INF	INF	0.6207	0.4348	0
Dn1_4813	3_Junction_4112_Junction_4113	TrissinR	chr2L:5851826-5852991	3_Junction_4112_Junction_4113	0.201056	21.9066	0.345	1	20.5333	reads okay	FALSE	FALSE	#N/A	2.63644	1	2	0	9	17	11	0	0	0	11	26	3	1	1	INF	0.6923	0.4048	0.5238	INF	INF	INF	0.3793	0.5652	1
Dn1_4941	3_Junction_5309_Junction_5311	CG12567	chr2LHet:21569-32571	3_Junction_5309_Junction_5311	0.577564	19.1341	0.0309	0.283057	24	reads okay	CYCLE	FALSE	#N/A	10	10	1	0	2	23	11	0	6	0	4	49	3	0.8333	0.1667	0	1	0.8846	0.9167	INF	0.5	0	0.6667	0.8909	0.75
Dn1_4942	3_Junction_5309_Junction_5311	CG12567	chr2LHet:21569-32571	3_Junction_5309_Junction_5311	0.633953	8.70009	0.0093	0.0907868	20	FALSE	FALSE	FALSE	#N/A	10	2	5	2	0	3	1	0	6	9	2	6	1	0.1667	0.8333	1	0	0.1154	0.0833	INF	0.5	1	0.3333	0.1091	0.25
Dn1_5021	3_Junction_5893_Junction_5894	ATPCL	chr2R:11883819-11884398	3_Junction_5893_Junction_5894	0.367317	2.27554	0.1243	0.752279	24	FALSE	FALSE	FALSE	#N/A	10	6	1	0	0	4	0	4	0	1	0	2	3	0.6	0.2	0	0	0.1026	0	1	INF	0.5	0	0.0357	0.4286
Dn1_5022	3_Junction_5893_Junction_5894	ATPCL	chr2R:11883819-11884398	3_Junction_5893_Junction_5894	0.557763	15.6731	0.0281	0.182464	24	reads okay	CYCLE	FALSE	#N/A	10	4	4	10	3	35	24	0	0	1	7	54	4	0.4	0.8	1	1	0.8974	1	0	INF	0.5	1	0.9643	0.5714
Dn1_5062	3_Junction_6234_Junction_6235	CG5522	chr2R:12677420-12678242	3_Junction_6234_Junction_6235	0.505061	10.8589	0.0351	0.14801	22	reads okay	CYCLE	FALSE	#N/A	9.49668	22	16	11	23	39	37	4	10	9	32	59	2	0.4783	0.8	1	0.7419	0.5065	0.5068	0.1538	0.6667	0.6	0.5161	0.7108	0.1053
Dn1_5063	3_Junction_6234_Junction_6235	CG5522	chr2R:12677420-12678242	3_Junction_6234_Junction_6235	0.505061	22.8589	0.0351	0.14801	22	reads okay	CYCLE	FALSE	#N/A	8.947	24	4	0	8	38	36	22	5	6	30	24	17	0.5217	0.2	0	0.2581	0.4935	0.4932	0.8462	0.3333	0.4	0.4839	0.2892	0.8947
Dn1_5064	3_Junction_6277_Junction_6278_Junction_6279	Pkc53E	chr2R:12812295-12813849	3_Junction_6277_Junction_6278_Junction_6279	0.11882	4.47888	0.6017	0.0212923	16	reads okay	FALSE	CYCLE	#N/A	10.3306	3	2	0	0	12	10	0	5	5	2	16	2	0.0968	1	INF	INF	0.2927	0.2857	INF	0.625	0.25	0.1667	0.3265	0.4
Dn1_5065	3_Junction_6277_Junction_6278_Junction_6279	Pkc53E	chr2R:12812295-12813849	3_Junction_6277_Junction_6278_Junction_6279	0.230937	19.4151	0.2992	1	20.5333	reads okay	FALSE	FALSE	#N/A	7.5	12	0	0	0	23	16	0	1	15	3	23	3	0.3871	0	INF	INF	0.561	0.4571	INF	0.125	0.75	0.25	0.4694	0.6
Dn1_5066	3_Junction_6277_Junction_6278_Junction_6279	Pkc53E	chr2R:12812295-12813849	3_Junction_6277_Junction_6278_Junction_6279	0.033386	20.1375	0.8508	1	20.5333	FALSE	FALSE	FALSE	#N/A	5.833	16	0	0	0	6	9	0	2	0	7	10	0	0.5161	0	INF	INF	0.1463	0.2571	INF	0.25	0	0.5833	0.2041	0
Dn1_5071	3_Junction_6324_Junction_6325	Ehbp1	chr2R:12900213-12900788	3_Junction_6324_Junction_6325	0.687436	3.10057	0.0128	0.23276	24	FALSE	FALSE	FALSE	#N/A	10	7	9	0	0	7	15	6	2	0	0	8	0	0.875	0.9	INF	0	0.2917	0.4286	1	1	0	0	0.2286	0
Dn1_5072	3_Junction_6324_Junction_6325	Ehbp1	chr2R:12900213-12900788	3_Junction_6324_Junction_6325	0.619273	16.4368	0.0273	0.425517	24	reads okay	CYCLE	FALSE	#N/A	10	1	1	0	1	17	20	0	0	1	4	27	6	0.125	0.1	INF	1	0.7083	0.5714	0	0	1	1	0.7714	1
Dn1_520	3_Junction_13354_Junction_13355	CG9705	chr3L:16773520-16773603	3_Junction_13354_Junction_13355	0.10151	22.6016	0.6734	0.0389891	16	reads okay	FALSE	CYCLE	mRNA cycles	2	5	14	0	26	44	14	9	13	15	40	49	6	1	0.5185	INF	0.8125	0.88	0.6667	1	1	0.75	0.8	0.8909	0.5
Dn1_521	3_Junction_13354_Junction_13355	CG9705	chr3L:16773520-16773603	3_Junction_13354_Junction_13355	0.0384083	20.403	0.8319	1	20.5333	FALSE	FALSE	FALSE	mRNA cycles	5	0	13	0	6	6	7	0	0	5	10	6	6	0	0.4815	INF	0.1875	0.12	0.3333	0	0	0.25	0.2	0.1091	0.5
Dn1_5253	3_Junction_6987_Junction_6990_Junction_6993	CG10737	chr2R:15062591-15063691	3_Junction_6987_Junction_6990_Junction_6993	0.071917	2.8465	0.7174	0.14801	16	reads okay	FALSE	FALSE	mRNA cycles	6.667	2	5	0	2	11	0	5	2	0	5	28	0	0.6667	0.3846	INF	0.25	0.2558	0	0.3571	0.3333	0	0.3846	0.3457	0
Dn1_5254	3_Junction_6987_Junction_6990_Junction_6993	CG10737	chr2R:15062591-15063691	3_Junction_6987_Junction_6990_Junction_6993	0.0149992	10.2921	0.9358	0.621276	16	reads okay	FALSE	FALSE	mRNA cycles	3.58295	1	7	0	6	12	12	6	4	1	8	28	5	0.3333	0.5385	INF	0.75	0.2791	0.7059	0.4286	0.6667	1	0.6154	0.3457	0.625
Dn1_5255	3_Junction_6987_Junction_6990_Junction_6993	CG10737	chr2R:15062591-15063691	3_Junction_6987_Junction_6990_Junction_6993	0.705719	20.6412	0.0101	0.23276	24	reads okay	CYCLE	FALSE	mRNA cycles	4.651	0	1	0	0	20	5	3	0	0	0	25	3	0	0.0769	INF	0	0.4651	0.2941	0.2143	0	0	0	0.3086	0.375
Dn1_5256	3_Junction_6988_Junction_6991_Junction_6994	CG10737	chr2R:15062591-15063751	3_Junction_6988_Junction_6991_Junction_6994	0.200602	1.61908	0.3713	0.752279	16	FALSE	FALSE	FALSE	mRNA cycles	22.8393	2	6	0	5	1	4	20	2	0	5	4	2	0.4	0.2857	INF	0.5	0.0417	0.3333	0.9524	0.3333	INF	0.4167	0.1053	0.25
Dn1_5257	3_Junction_6988_Junction_6991_Junction_6994	CG10737	chr2R:15062591-15063751	3_Junction_6988_Junction_6991_Junction_6994	0.0632947	4.22476	0.7317	1	20.5333	reads okay	FALSE	FALSE	mRNA cycles	6.667	3	12	0	3	7	1	0	4	0	3	16	1	0.6	0.5714	INF	0.3	0.2917	0.0833	0	0.6667	INF	0.25	0.4211	0.125
Dn1_5258	3_Junction_6988_Junction_6991_Junction_6994	CG10737	chr2R:15062591-15063751	3_Junction_6988_Junction_6991_Junction_6994	0.803601	19.2494	0.0023	0.0301407	24	reads okay	CYCLE	CYCLE	mRNA cycles	6.667	0	3	0	2	16	7	1	0	0	4	18	5	0	0.1429	INF	0.2	0.6667	0.5833	0.0476	0	INF	0.3333	0.4737	0.625
Dn1_528	3_Junction_13405_Junction_13406	Nc73EF	chr3L:16953767-16955433	3_Junction_13405_Junction_13406	0.637431	17.3567	0.0104	0.0535033	20	reads okay	CYCLE	FALSE	#N/A	7.609	3	0	0	9	35	5	0	0	0	4	43	0	0.1429	0	INF	0.6	0.7609	0.2632	0	0	0	0.1667	0.6324	0
Dn1_529	3_Junction_13405_Junction_13406	Nc73EF	chr3L:16953767-16955433	3_Junction_13405_Junction_13406	0.378944	3.24038	0.1253	0.354287	24	reads okay	FALSE	FALSE	#N/A	4.18235	18	4	0	6	11	14	3	6	4	20	25	2	0.8571	1	INF	0.4	0.2391	0.7368	1	1	1	0.8333	0.3676	1
Dn1_5315	3_Junction_7316_Junction_7317	CG12484	chr2R:16359480-16359577	3_Junction_7316_Junction_7317	0.67144	20.6331	0.0102	0.0212923	24	reads okay	CYCLE	CYCLE	#N/A	6.923	6	2	0	1	15	13	14	0	0	8	16	9	0.25	0.3333	0	0.0909	0.625	0.3611	0.3415	0	0	0.4	0.4444	0.6923
Dn1_5316	3_Junction_7316_Junction_7317	CG12484	chr2R:16359480-16359577	3_Junction_7316_Junction_7317	0.67144	8.63312	0.0102	0.0212923	24	reads okay	CYCLE	CYCLE	#N/A	3.24992	18	4	14	10	9	23	27	8	3	12	20	4	0.75	0.6667	1	0.9091	0.375	0.6389	0.6585	1	1	0.6	0.5556	0.3077
Dn1_5320	3_Junction_733_Junction_734	crol	chr2L:11799402-11800153	3_Junction_733_Junction_734	0.0973496	6.89434	0.6147	1	20.5333	reads okay	FALSE	FALSE	#N/A	10	3	3	2	0	11	15	2	1	0	4	17	0	0.6	1	1	INF	0.4583	0.7895	0.3333	1	INF	1	0.6071	0
Dn1_5321	3_Junction_733_Junction_734	crol	chr2L:11799402-11800153	3_Junction_733_Junction_734	0.660521	22.1975	0.0067	0.113556	22	reads okay	CYCLE	FALSE	#N/A	10	2	0	0	0	13	4	4	0	0	0	11	1	0.4	0	0	INF	0.5417	0.2105	0.6667	0	INF	0	0.3929	1
Dn1_5375	3_Junction_8181_Junction_8182	Ars2	chr2R:1968539-1969239	3_Junction_8181_Junction_8182	0.571127	9.83972	0.0015	0.0535033	22	reads okay	CYCLE	FALSE	#N/A	6.88705	37	37	27	13	19	17	9	20	11	28	29	4	0.4157	0.3854	1	0.3333	0.2346	0.1683	0.1452	0.3279	0.5789	0.4058	0.2302	0.1739
Dn1_5376	3_Junction_8181_Junction_8182	Ars2	chr2R:1968539-1969239	3_Junction_8181_Junction_8182	0.571127	21.8397	0.0015	0.0535033	22	reads okay	CYCLE	FALSE	#N/A	8.548	52	59	0	26	62	84	53	41	8	41	97	19	0.5843	0.6146	0	0.6667	0.7654	0.8317	0.8548	0.6721	0.4211	0.5942	0.7698	0.8261
Dn1_5393	3_Junction_8506_Junction_8507	slik	chr2R:20286706-20287721	3_Junction_8506_Junction_8507	0.579855	0.658078	0.0196	0.0535033	20	reads okay	CYCLE	FALSE	#N/A	6.875	22	7	0	0	9	10	4	1	0	9	23	2	0.6875	0.4118	0	0	0.25	0.2941	0.6667	0.1111	0	0.2195	0.3333	0.2222
Dn1_5394	3_Junction_8506_Junction_8507	slik	chr2R:20286706-20287721	3_Junction_8506_Junction_8507	0.579855	12.6581	0.0196	0.0535033	20	reads okay	CYCLE	FALSE	#N/A	3.2	10	10	7	12	27	24	2	8	3	32	46	7	0.3125	0.5882	1	1	0.75	0.7059	0.3333	0.8889	1	0.7805	0.6667	0.7778
Dn1_5504	3_Junction_9729_Junction_9730	stmA	chr2R:4619316-4619663	3_Junction_9729_Junction_9730	0.13358	15.2493	0.5947	0.0109748	16	reads okay	FALSE	CYCLE	#N/A	1.7001	11	3	5	20	49	30	9	0	4	7	65	20	0.9167	0.6	1	1	0.7538	0.8333	1	INF	1	1	0.7471	0.5882
Dn1_5505	3_Junction_9729_Junction_9730	stmA	chr2R:4619316-4619663	3_Junction_9729_Junction_9730	0.261613	21.922	0.2503	0.523397	16	reads okay	FALSE	FALSE	#N/A	4.118	1	2	0	0	16	6	0	0	0	0	22	14	0.0833	0.4	0	0	0.2462	0.1667	0	INF	0	0	0.2529	0.4118
Dn1_5520	5_Junction_10081_Junction_10082	Camta	chr2R:5362709-5363604	5_Junction_10081_Junction_10082	0.520811	2.23217	0.0446	0.182464	22	FALSE	FALSE	FALSE	#N/A	10	10	9	0	0	12	3	2	0	0	0	9	1	1	1	INF	INF	0.2791	0.1364	1	INF	INF	0	0.1607	0.25
Dn1_5521	5_Junction_10081_Junction_10082	Camta	chr2R:5362709-5363604	5_Junction_10081_Junction_10082	0.681023	18.7	0.0278	0.883281	24	reads okay	CYCLE	FALSE	#N/A	10	0	0	0	0	31	19	0	0	0	1	47	3	0	0	INF	INF	0.7209	0.8636	0	INF	INF	1	0.8393	0.75
Dn1_5530	5_Junction_10186_Junction_10187	hebe	chr2R:5717364-5723946	5_Junction_10186_Junction_10187	0.36349	19.0336	0.1409	0.425517	24	FALSE	FALSE	FALSE	#N/A	9.0009	0	0	0	1	5	6	0	0	0	7	3	2	INF	INF	INF	0.5	0.1429	1	INF	INF	INF	0.6364	0.1111	0.6667
Dn1_5531	5_Junction_10186_Junction_10187	hebe	chr2R:5717364-5723946	5_Junction_10186_Junction_10187	0.733781	17.2611	0.0013	0.0389891	24	reads okay	CYCLE	CYCLE	#N/A	8.889	0	0	0	1	30	0	0	0	0	4	24	1	INF	INF	INF	0.5	0.8571	0	INF	INF	INF	0.3636	0.8889	0.3333
Dn1_5639	5_Junction_11371_Junction_11372	bbc	chr2R:9375637-9378243	5_Junction_11371_Junction_11372	0.450113	0.256855	0.0575	0.0212923	20	reads okay	FALSE	CYCLE	#N/A	10	15	4	0	3	11	3	7	0	0	1	20	4	0.8333	0.3636	INF	0.25	0.3548	0.0811	1	0	0	0.0333	0.4	0.4444
Dn1_5640	5_Junction_11371_Junction_11372	bbc	chr2R:9375637-9378243	5_Junction_11371_Junction_11372	0.140029	14.2463	0.4857	1	20.5333	reads okay	FALSE	FALSE	#N/A	10	3	7	0	9	20	34	0	4	5	29	30	5	0.1667	0.6364	INF	0.75	0.6452	0.9189	0	1	1	0.9667	0.6	0.5556
Dn1_5861	5_Junction_12573_Junction_12574	dysc	chr3L:13867108-13870722	5_Junction_12573_Junction_12574	0.567711	2.96937	0.0215	0.113556	24	FALSE	FALSE	FALSE	#N/A	10	4	3	0	1	6	18	2	1	1	0	5	3	0.5	1	INF	0.1667	0.3333	0.5806	1	0.5	0.5	0	0.25	0.25
Dn1_5862	5_Junction_12573_Junction_12574	dysc	chr3L:13867108-13870722	5_Junction_12573_Junction_12574	0.526249	16.8876	0.0399	0.23276	24	reads okay	CYCLE	FALSE	#N/A	10	4	0	0	5	12	13	0	1	1	2	15	9	0.5	0	INF	0.8333	0.6667	0.4194	0	0.5	0.5	1	0.75	0.75
Dn1_5907	5_Junction_13055_Junction_13056_Junction_13057	th	chr3L:16033165-16043556	5_Junction_13055_Junction_13056_Junction_13057	0.248943	10.9599	0.2646	0.621276	18	reads okay	FALSE	FALSE	#N/A	10	12	7	14	6	21	12	1	0	3	10	23	4	0.3429	0.4667	1	0.3158	0.2658	0.24	0.0588	0	0.375	0.3571	0.219	0.2857
Dn1_5908	5_Junction_13055_Junction_13056_Junction_13057	th	chr3L:16033165-16043556	5_Junction_13055_Junction_13056_Junction_13057	0.124602	5.95134	0.5444	1	20.5333	reads okay	FALSE	FALSE	#N/A	9.412	15	7	0	8	37	13	16	19	5	16	46	0	0.4286	0.4667	0	0.4211	0.4684	0.26	0.9412	0.9048	0.625	0.5714	0.4381	0
Dn1_5909	5_Junction_13055_Junction_13056_Junction_13057	th	chr3L:16033165-16043556	5_Junction_13055_Junction_13056_Junction_13057	0.653416	20.7285	0.0046	0.0161336	24	reads okay	CYCLE	CYCLE	#N/A	7.143	8	1	0	5	21	25	0	2	0	2	36	10	0.2286	0.0667	0	0.2632	0.2658	0.5	0	0.0952	0	0.0714	0.3429	0.7143
Dn1_5981	5_Junction_13462_Junction_13463	Rbp6	chr3L:17122071-17158011	5_Junction_13462_Junction_13463	0.515062	0.482074	0.0454	0.23276	22	reads okay	CYCLE	FALSE	#N/A	2	74	37	4	29	160	172	20	11	18	45	238	16	0.9024	0.6981	0.5	0.6444	0.8205	0.835	0.8696	1	0.8182	0.6	0.8041	0.9412
Dn1_5982	5_Junction_13462_Junction_13463	Rbp6	chr3L:17122071-17158011	5_Junction_13462_Junction_13463	0.515062	12.4821	0.0454	0.23276	22	reads okay	CYCLE	FALSE	#N/A	5	8	16	4	16	35	34	3	0	4	30	58	1	0.0976	0.3019	0.5	0.3556	0.1795	0.165	0.1304	0	0.1818	0.4	0.1959	0.0588
Dn1_5989	5_Junction_1348_Junction_1349	CG9293	chr2L:13386257-13386528	5_Junction_1348_Junction_1349	0.432957	11.3394	0.0132	0.0212923	20	FALSE	FALSE	FALSE	#N/A	10	0	1	4	3	2	2	0	0	1	6	3	0	0	0.25	1	0.1875	0.1818	0.1053	0	0	0.25	0.3529	0.1154	0
Dn1_5990	5_Junction_1348_Junction_1349	CG9293	chr2L:13386257-13386528	5_Junction_1348_Junction_1349	0.432957	23.3394	0.0132	0.0212923	20	reads okay	FALSE	CYCLE	#N/A	10	10	3	0	13	9	17	2	3	3	11	23	8	1	0.75	0	0.8125	0.8182	0.8947	1	1	0.75	0.6471	0.8846	1
Dn1_6037	5_Junction_138_Junction_139_Junction_140	Pten	chr2L:10256506-10257776	5_Junction_138_Junction_139_Junction_140	0.117294	9.16433	0.566	1	20.5333	reads okay	FALSE	FALSE	#N/A	4.865	18	7	0	13	3	4	0	18	8	4	1	6	0.2951	0.1296	0	0.4194	0.0536	0.1333	0	0.4865	0.2581	0.3077	0.0156	0.1667
Dn1_6038	5_Junction_138_Junction_139_Junction_140	Pten	chr2L:10256506-10257776	5_Junction_138_Junction_139_Junction_140	0.175976	0.439838	0.4455	0.0212923	16	reads okay	FALSE	CYCLE	#N/A	10	20	10	0	1	21	1	4	8	2	3	28	2	0.3279	0.1852	0	0.0323	0.375	0.0333	1	0.2162	0.0645	0.2308	0.4375	0.0556
Dn1_6041	5_Junction_13934_Junction_13935	CG9368	chr3L:19595160-19595769	5_Junction_13934_Junction_13935	0.547922	9.11733	0.033	0.14801	18	reads okay	CYCLE	FALSE	#N/A	1.83318	7	4	5	4	12	30	8	3	6	4	16	4	0.7778	0.8	1	1	0.5455	0.8571	0.8889	1	1	1	0.6667	0.6667
Dn1_6042	5_Junction_13934_Junction_13935	CG9368	chr3L:19595160-19595769	5_Junction_13934_Junction_13935	0.547922	21.1173	0.033	0.14801	18	FALSE	FALSE	FALSE	#N/A	4.545	2	1	0	0	10	5	1	0	0	0	8	2	0.2222	0.2	0	0	0.4545	0.1429	0.1111	0	0	0	0.3333	0.3333
Dn1_6096	5_Junction_14691_Junction_14692	mub	chr3L:21908755-21914001	5_Junction_14691_Junction_14692	0.0698744	23.4281	0.7126	0.000957993	16	reads okay	FALSE	CYCLE	#N/A	9.74513	39	5	0	4	44	17	29	1	4	20	55	1	0.65	0.3571	INF	0.4	0.4272	0.2576	0.6304	0.25	0.3333	0.3922	0.4911	0.0667
Dn1_6097	5_Junction_14691_Junction_14692	mub	chr3L:21908755-21914001	5_Junction_14691_Junction_14692	0.104838	21.0586	0.6343	0.425517	16	reads okay	FALSE	FALSE	#N/A	2.66657	21	9	0	6	59	49	17	3	8	31	57	14	0.35	0.6429	INF	0.6	0.5728	0.7424	0.3696	0.75	0.6667	0.6078	0.5089	0.9333
Dn1_6205	5_Junction_15192_Junction_15193_Junction_15194	Shab	chr3L:2941624-2947875	5_Junction_15192_Junction_15193_Junction_15194	0.331386	17.2926	0.1754	1	20.5333	reads okay	FALSE	FALSE	mRNA cycles	4.167	2	6	0	3	23	22	0	2	1	5	25	4	0.0455	0.3158	INF	0.2727	0.3966	0.3607	0	0.2857	0.2	0.4167	0.3289	0.3333
Dn1_6206	5_Junction_15192_Junction_15193_Junction_15194	Shab	chr3L:2941624-2947875	5_Junction_15192_Junction_15193_Junction_15194	0.0026411	3.87174	0.9909	1	20.5333	reads okay	FALSE	FALSE	mRNA cycles	3.8666	11	7	0	6	12	17	5	2	4	5	19	8	0.25	0.3684	INF	0.5455	0.2069	0.2787	0.625	0.2857	0.8	0.4167	0.25	0.6667
Dn1_6207	5_Junction_15192_Junction_15193_Junction_15194	Shab	chr3L:2941624-2947875	5_Junction_15192_Junction_15193_Junction_15194	0.296036	0.4498	0.2136	0.0389891	16	reads okay	FALSE	CYCLE	mRNA cycles	7.045	31	6	0	2	23	22	3	3	0	2	32	0	0.7045	0.3158	INF	0.1818	0.3966	0.3607	0.375	0.4286	0	0.1667	0.4211	0
Dn1_6237	5_Junction_15462_Junction_15463	CG32264	chr3L:3743772-3746303	5_Junction_15462_Junction_15463	0.837179	23.8064	0.0009	0.0109748	22	reads okay	CYCLE	CYCLE	#N/A	10	11	6	0	8	13	11	12	4	0	0	15	4	1	0.3333	INF	0.5	0.4815	1	1	0.8	0	INF	0.5556	1
Dn1_6238	5_Junction_15462_Junction_15463	CG32264	chr3L:3743772-3746303	5_Junction_15462_Junction_15463	0.223335	11.5499	0.314	1	20.5333	reads okay	FALSE	FALSE	#N/A	10	0	12	0	8	14	0	0	1	1	0	12	0	0	0.6667	INF	0.5	0.5185	0	0	0.2	1	INF	0.4444	0
Dn1_625	3_Junction_14357_Junction_14358_Junction_14359_Junction_14360	Pka-R1	chr3L:20809933-20825944	3_Junction_14357_Junction_14358_Junction_14359_Junction_14360	0.755885	18.6608	0.0017	0.00813893	24	reads okay	CYCLE	CYCLE	mRNA cycles	6.452	15	5	0	14	29	26	15	0	0	11	40	6	0.2174	0.1724	0	0.4667	0.617	0.4127	0.2055	0	0	0.275	0.6452	0.2222
Dn1_6257	5_Junction_15699_Junction_15700	Cip4	chr3L:4324450-4324920	5_Junction_15699_Junction_15700	0.129511	1.23311	0.5218	0.0301407	16	reads okay	FALSE	CYCLE	#N/A	10	2	4	0	0	16	4	0	2	5	0	10	16	0.4	1	INF	INF	0.6957	0.8	0	1	0.8333	0	0.625	1
Dn1_6258	5_Junction_15699_Junction_15700	Cip4	chr3L:4324450-4324920	5_Junction_15699_Junction_15700	0.0490994	21.6115	0.7666	0.621276	16	FALSE	FALSE	FALSE	#N/A	10	3	0	0	0	7	1	2	0	1	1	6	0	0.6	0	INF	INF	0.3043	0.2	1	0	0.1667	1	0.375	0
Dn1_626	3_Junction_14357_Junction_14358_Junction_14359_Junction_14360	Pka-R1	chr3L:20809933-20825944	3_Junction_14357_Junction_14358_Junction_14359_Junction_14360	0.159654	7.26635	0.4815	1	20.5333	reads okay	FALSE	FALSE	mRNA cycles	10	27	13	4	9	8	18	42	2	0	13	6	1	0.3913	0.4483	1	0.3	0.1702	0.2857	0.5753	0.1538	0	0.325	0.0968	0.037
Dn1_627	3_Junction_14357_Junction_14358_Junction_14359_Junction_14360	Pka-R1	chr3L:20809933-20825944	3_Junction_14357_Junction_14358_Junction_14359_Junction_14360	0.1528	7.43228	0.5003	1	20.5333	reads okay	FALSE	FALSE	mRNA cycles	8.462	22	8	0	5	8	14	8	11	8	16	14	10	0.3188	0.2759	0	0.1667	0.1702	0.2222	0.1096	0.8462	0.8	0.4	0.2258	0.3704
Dn1_6272	5_Junction_15843_Junction_15844	shep	chr3L:5160159-5161348	5_Junction_15843_Junction_15844	0.00808858	15.6505	0.9672	1	20.5333	reads okay	FALSE	FALSE	#N/A	2.68601	10	7	0	2	28	28	0	4	0	1	35	11	0.7692	0.7778	INF	1	0.5	0.5185	INF	1	INF	1	0.3723	0.5238
Dn1_6273	5_Junction_15843_Junction_15844	shep	chr3L:5160159-5161348	5_Junction_15843_Junction_15844	0.665776	20.6031	0.0112	0.354287	22.6667	reads okay	CYCLE	FALSE	#N/A	6.277	3	2	0	0	28	26	0	0	0	0	59	10	0.2308	0.2222	INF	0	0.5	0.4815	INF	0	INF	0	0.6277	0.4762
Dn1_6274	5_Junction_15846_Junction_15847_Junction_15848	shep	chr3L:5163540-5212048	5_Junction_15846_Junction_15847_Junction_15848	0.313436	10.4921	0.1778	0.0161336	16	reads okay	FALSE	CYCLE	#N/A	57.1429	12	4	13	4	28	56	1	6	2	26	40	5	0.2553	0.2353	0.7647	0.3333	0.3182	0.5138	0.0175	0.6667	1	0.4407	0.2632	0.4545
Dn1_6275	5_Junction_15846_Junction_15847_Junction_15848	shep	chr3L:5163540-5212048	5_Junction_15846_Junction_15847_Junction_15848	0.369876	2.00574	0.128	0.182464	20	FALSE	FALSE	FALSE	#N/A	4.545	8	4	0	0	6	2	6	3	0	0	4	5	0.1702	0.2353	0	0	0.0682	0.0183	0.1053	0.3333	0	0	0.0263	0.4545
Dn1_6276	5_Junction_15846_Junction_15847_Junction_15848	shep	chr3L:5163540-5212048	5_Junction_15846_Junction_15847_Junction_15848	0.166691	19.961	0.4226	0.0301407	16	reads okay	FALSE	CYCLE	#N/A	8.772	27	9	4	8	54	51	50	0	0	33	108	1	0.5745	0.5294	0.2353	0.6667	0.6136	0.4679	0.8772	0	0	0.5593	0.7105	0.0909
Dn1_628	3_Junction_14357_Junction_14358_Junction_14359_Junction_14360	Pka-R1	chr3L:20809933-20825944	3_Junction_14357_Junction_14358_Junction_14359_Junction_14360	0.138555	23.5349	0.5727	1	20.5333	FALSE	FALSE	FALSE	mRNA cycles	3.704	5	3	0	2	2	5	8	0	2	0	2	10	0.0725	0.1034	0	0.0667	0.0426	0.0794	0.1096	0	0.2	0	0.0323	0.3704
Dn1_6284	5_Junction_15923_Junction_15924	sif	chr3L:5668308-5669375	5_Junction_15923_Junction_15924	0.429686	7.99433	0.0934	0.425517	24	reads okay	FALSE	FALSE	#N/A	13.1926	10	5	0	5	21	5	3	3	2	3	24	1	0.5556	1	INF	0.5	0.2561	0.0758	0.2	1	1	0.6	0.25	0.125
Dn1_6285	5_Junction_15923_Junction_15924	sif	chr3L:5668308-5669375	5_Junction_15923_Junction_15924	0.919342	20.6591	0.0006	0.00236091	24	reads okay	CYCLE	CYCLE	#N/A	9.242	8	0	0	5	61	61	12	0	0	2	72	7	0.4444	0	INF	0.5	0.7439	0.9242	0.8	0	0	0.4	0.75	0.875
Dn1_643	3_Junction_14556_Junction_14557	M6	chr3L:21501367-21504189	3_Junction_14556_Junction_14557	0.186533	1.9863	0.3837	0.752279	16	FALSE	FALSE	FALSE	#N/A	10	5	3	0	0	7	11	3	0	0	7	9	0	1	1	INF	0	0.3333	0.4231	1	INF	INF	0.875	0.25	INF
Dn1_644	3_Junction_14556_Junction_14557	M6	chr3L:21501367-21504189	3_Junction_14556_Junction_14557	0.57904	17.2118	0.0172	0.182464	24	reads okay	CYCLE	FALSE	#N/A	10	0	0	0	2	14	15	0	0	0	1	27	0	0	0	INF	1	0.6667	0.5769	0	INF	INF	0.125	0.75	INF
Dn1_6470	5_Junction_16422_Junction_16423	Mp	chr3L:7038455-7039432	5_Junction_16422_Junction_16423	0.562593	18.5851	0.0104	0.23276	24	reads okay	CYCLE	FALSE	mRNA cycles	6.316	1	0	0	0	36	18	0	0	0	1	42	0	0.0417	0	0	0	0.6316	0.3673	0	0	0	0.1429	0.6269	0
Dn1_6471	5_Junction_16422_Junction_16423	Mp	chr3L:7038455-7039432	5_Junction_16422_Junction_16423	0.562593	6.58507	0.0118	0.23276	24	reads okay	CYCLE	FALSE	mRNA cycles	2.71444	23	8	4	9	21	31	26	2	2	6	25	14	0.9583	1	1	1	0.3684	0.6327	1	1	1	0.8571	0.3731	1
Dn1_6486	5_Junction_16554_Junction_16555	smid	chr3L:7375831-7375886	5_Junction_16554_Junction_16555	0.514951	17.3557	0.0454	0.883281	24	reads okay	CYCLE	FALSE	mRNA cycles	2	4	4	0	4	17	9	0	0	6	4	29	2	0.5	0.5	INF	1	0.8095	0.9	INF	INF	0.8571	1	0.7436	1
Dn1_6487	5_Junction_16554_Junction_16555	smid	chr3L:7375831-7375886	5_Junction_16554_Junction_16555	0.110705	2.62313	0.5825	1	20.5333	FALSE	FALSE	FALSE	mRNA cycles	5	4	4	0	0	4	1	0	0	1	0	10	0	0.5	0.5	INF	0	0.1905	0.1	INF	INF	0.1429	0	0.2564	0
Dn1_6494	5_Junction_16588_Junction_16589	lqf	chr3L:7528744-7530074	5_Junction_16588_Junction_16589	0.22501	19.7543	0.309	1	20.5333	reads okay	FALSE	FALSE	#N/A	10	6	3	0	3	22	39	7	0	0	1	26	5	0.6667	0.75	INF	1	0.44	0.8478	0.5833	0	INF	1	0.4643	0.625
Dn1_6495	5_Junction_16588_Junction_16589	lqf	chr3L:7528744-7530074	5_Junction_16588_Junction_16589	0.211898	0.900496	0.3469	0.0212923	16	reads okay	FALSE	CYCLE	#N/A	10	3	1	0	0	28	7	5	4	0	0	30	3	0.3333	0.25	INF	0	0.56	0.1522	0.4167	1	INF	0	0.5357	0.375
Dn1_6583	5_Junction_17374_Junction_17375	CG44838	chr3L:9463733-9466226	5_Junction_17374_Junction_17375	0.597769	0.981282	0.0193	0.0680175	20	reads okay	CYCLE	FALSE	#N/A	4.66636	20	9	0	2	21	22	17	6	0	3	42	3	0.6452	0.6	INF	0.25	0.4773	0.5366	1	1	INF	0.2143	0.6176	0.6
Dn1_6584	5_Junction_17374_Junction_17375	CG44838	chr3L:9463733-9466226	5_Junction_17374_Junction_17375	0.452513	17.3196	0.0695	0.621276	24	reads okay	FALSE	FALSE	#N/A	7.857	11	6	0	6	23	19	0	0	0	11	26	2	0.3548	0.4	INF	0.75	0.5227	0.4634	0	0	INF	0.7857	0.3824	0.4
Dn1_6587	5_Junction_17438_Junction_17439	CG6767	chr3L:9679563-9682363	5_Junction_17438_Junction_17439	0.606979	17.6816	0.0147	0.23276	24	reads okay	CYCLE	FALSE	#N/A	2.676	0	3	0	4	19	7	0	0	0	1	26	0	0	0.0536	0	0.1481	0.2676	0.1429	0	0	0	0.0556	0.243	0
Dn1_6588	5_Junction_17438_Junction_17439	CG6767	chr3L:9679563-9682363	5_Junction_17438_Junction_17439	0.606979	5.68165	0.0148	0.23276	24	reads okay	CYCLE	FALSE	#N/A	1.36537	52	53	1	23	52	42	17	14	25	17	81	43	1	0.9464	1	0.8519	0.7324	0.8571	1	1	1	0.9444	0.757	1
Dn1_661	3_Junction_14692_Junction_14693	mub	chr3L:21908755-21914001	3_Junction_14692_Junction_14693	0.0384686	3.4159	0.8539	0.883281	20	reads okay	FALSE	FALSE	#N/A	2.57865	21	9	0	6	59	49	17	3	8	31	57	14	0.3962	0.6	INF	0.5	0.4758	0.5904	0.5152	1	0.8	0.6889	0.3878	0.7778
Dn1_662	3_Junction_14692_Junction_14693	mub	chr3L:21908755-21914001	3_Junction_14692_Junction_14693	0.34976	20.4703	0.1421	0.0301407	20	reads okay	FALSE	CYCLE	#N/A	6.122	32	6	0	6	65	34	16	0	2	14	90	4	0.6038	0.4	INF	0.5	0.5242	0.4096	0.4848	0	0.2	0.3111	0.6122	0.2222
Dn1_6660	5_Junction_17752_Junction_17753	NK7.1	chr3R:10193221-10195569	5_Junction_17752_Junction_17753	0.22433	3.30013	0.311	1	20.5333	reads okay	FALSE	FALSE	#N/A	10	16	5	0	1	6	16	0	13	6	0	6	9	0.9412	0.8333	INF	0.5	0.24	1	INF	1	1	0	0.1277	0.8182
Dn1_6661	5_Junction_17752_Junction_17753	NK7.1	chr3R:10193221-10195569	5_Junction_17752_Junction_17753	0.660429	16.2938	0.0085	0.354287	20	reads okay	CYCLE	FALSE	#N/A	10	1	1	0	1	19	0	0	0	0	9	41	2	0.0588	0.1667	INF	0.5	0.76	0	INF	0	0	1	0.8723	0.1818
Dn1_6671	5_Junction_17862_Junction_17863	jvl	chr3R:10614341-10614419	5_Junction_17862_Junction_17863	0.267222	17.5023	0.2294	1	20.5333	reads okay	FALSE	FALSE	#N/A	2.27273	5	0	0	2	11	5	0	0	1	2	26	5	1	INF	INF	1	0.44	0.7143	INF	INF	1	1	0.5909	1
Dn1_6672	5_Junction_17862_Junction_17863	jvl	chr3R:10614341-10614419	5_Junction_17862_Junction_17863	0.50136	18.8363	0.0187	0.883281	24	reads okay	CYCLE	FALSE	#N/A	5.6	0	0	0	0	14	2	0	0	0	0	18	0	0	INF	INF	0	0.56	0.2857	INF	INF	0	0	0.4091	0
Dn1_6715	5_Junction_18192_Junction_18193	cpx	chr3R:117794-120849	5_Junction_18192_Junction_18193	0.333611	3.83097	0.1724	0.0389891	20	reads okay	FALSE	CYCLE	#N/A	8.333	7	5	0	5	21	34	3	3	10	4	39	14	0.3333	0.8333	0	0.2941	0.2727	0.4789	0.375	0.75	0.3333	0.2667	0.2468	0.359
Dn1_6716	5_Junction_18192_Junction_18193	cpx	chr3R:117794-120849	5_Junction_18192_Junction_18193	0.333611	15.831	0.1724	0.0389891	20	reads okay	FALSE	CYCLE	#N/A	5.9988	14	1	3	12	56	37	5	1	20	11	119	25	0.6667	0.1667	1	0.7059	0.7273	0.5211	0.625	0.25	0.6667	0.7333	0.7532	0.641
Dn1_6790	5_Junction_18879_Junction_18880	Ada2a	chr3R:14079177-14081037	5_Junction_18879_Junction_18880	0.228504	22.3901	0.2962	0.0212923	16	reads okay	FALSE	CYCLE	#N/A	10	18	11	0	2	23	4	11	0	1	9	25	3	0.7826	0.5238	INF	0.1429	0.8846	0.1667	1	0	0.0588	0.375	0.7353	0.1364
Dn1_6791	5_Junction_18879_Junction_18880	Ada2a	chr3R:14079177-14081037	5_Junction_18879_Junction_18880	0.0208571	11.2649	0.8961	1	20.5333	reads okay	FALSE	FALSE	#N/A	10	5	10	0	12	3	20	0	9	16	15	9	19	0.2174	0.4762	INF	0.8571	0.1154	0.8333	0	1	0.9412	0.625	0.2647	0.8636
Dn1_6794	5_Junction_18968_Junction_18969	CG7694	chr3R:14403306-14415837	5_Junction_18968_Junction_18969	0.128248	21.5383	0.5721	1	20.5333	reads okay	FALSE	FALSE	#N/A	8.4	4	6	0	6	14	42	0	8	7	2	14	7	0.2667	0.3333	INF	0.3	0.359	0.84	0	0.381	0.4118	0.125	0.2857	0.3182
Dn1_6795	5_Junction_18968_Junction_18969	CG7694	chr3R:14403306-14415837	5_Junction_18968_Junction_18969	0.0279516	22.787	0.8692	0.0389891	16	reads okay	FALSE	CYCLE	#N/A	6.25	11	12	0	14	25	8	2	13	10	14	35	15	0.7333	0.6667	INF	0.7	0.641	0.16	1	0.619	0.5882	0.875	0.7143	0.6818
Dn1_7253	5_Junction_19609_Junction_19610	unc79	chr3R:15064718-15066479	5_Junction_19609_Junction_19610	0.599096	18.0945	0.026	0.621276	24	reads okay	CYCLE	FALSE	#N/A	2	3	0	0	6	22	34	0	0	1	10	21	4	0.6	INF	INF	0.8571	0.6667	0.8293	INF	INF	0.5	1	0.5676	1
Dn1_7254	5_Junction_19609_Junction_19610	unc79	chr3R:15064718-15066479	5_Junction_19609_Junction_19610	0.0878142	17.4974	0.6452	1	20.5333	reads okay	FALSE	FALSE	#N/A	5	2	0	0	1	11	7	0	0	1	0	16	0	0.4	INF	INF	0.1429	0.3333	0.1707	INF	INF	0.5	0	0.4324	0
Dn1_7257	5_Junction_19648_Junction_19649	plx	chr3R:1533663-1534219	5_Junction_19648_Junction_19649	0.300117	0.526665	0.1987	0.113556	16	reads okay	FALSE	FALSE	#N/A	10	1	6	0	0	17	9	0	2	0	4	24	1	1	1	INF	0	0.6071	0.6923	INF	1	INF	0.5	0.5333	1
Dn1_7258	5_Junction_19648_Junction_19649	plx	chr3R:1533663-1534219	5_Junction_19648_Junction_19649	0.619217	15.9766	0.0117	0.113556	24	reads okay	CYCLE	FALSE	#N/A	10	0	0	0	2	11	4	0	0	0	4	21	0	0	0	INF	1	0.3929	0.3077	INF	0	INF	0.5	0.4667	0
Dn1_7311	5_Junction_20076_Junction_20077	Synd	chr3R:16664345-16664399	5_Junction_20076_Junction_20077	0.587719	21.564	0.0213	0.0907868	24	reads okay	CYCLE	FALSE	#N/A	6.667	11	2	0	2	5	14	15	1	0	7	18	6	0.55	0.3333	INF	0.3333	0.2778	0.56	0.4054	0.2	0	0.5833	0.4737	0.6667
Dn1_7312	5_Junction_20076_Junction_20077	Synd	chr3R:16664345-16664399	5_Junction_20076_Junction_20077	0.0350977	8.42502	0.8673	1	20.5333	reads okay	FALSE	FALSE	#N/A	3.0003	9	4	0	4	13	11	22	4	1	5	20	3	0.45	0.6667	INF	0.6667	0.7222	0.44	0.5946	0.8	1	0.4167	0.5263	0.3333
Dn1_7322	5_Junction_20141_Junction_20142	Calx	chr3R:16833962-16835196	5_Junction_20141_Junction_20142	0.190044	3.32229	0.3912	1	20.5333	FALSE	FALSE	FALSE	mRNA cycles	10	1	0	0	0	2	13	0	8	3	0	1	0	1	INF	INF	0	0.1538	0.9286	INF	1	0.75	INF	0.0476	INF
Dn1_7323	5_Junction_20141_Junction_20142	Calx	chr3R:16833962-16835196	5_Junction_20141_Junction_20142	0.525208	16.3469	0.0468	0.523397	24	reads okay	CYCLE	FALSE	mRNA cycles	10	0	0	0	1	11	1	0	0	1	0	20	0	0	INF	INF	1	0.8462	0.0714	INF	0	0.25	INF	0.9524	INF
Dn1_7326	5_Junction_20161_Junction_20162	CG31207	chr3R:16872541-16872637	5_Junction_20161_Junction_20162	0.301859	11.247	0.2048	0.523397	22	reads okay	FALSE	FALSE	mRNA cycles	3.333	2	25	0	6	17	2	0	24	1	5	16	4	0.1053	0.2604	INF	0.3333	0.1491	0.0769	0	0.2264	0.3333	0.1923	0.106	0.1
Dn1_7327	5_Junction_20161_Junction_20162	CG31207	chr3R:16872541-16872637	5_Junction_20161_Junction_20162	0.496881	22.4192	0.0004	0.00236091	22	reads okay	FALSE	CYCLE	mRNA cycles	1.49993	17	71	0	12	97	24	6	82	2	21	135	36	0.8947	0.7396	INF	0.6667	0.8509	0.9231	1	0.7736	0.6667	0.8077	0.894	0.9
Dn1_7489	5_Junction_20878_Junction_20879	cnc	chr3R:19035605-19048517	5_Junction_20878_Junction_20879	0.0907492	3.49406	0.6359	1	20.5333	FALSE	FALSE	FALSE	#N/A	10	1	1	0	1	6	8	0	1	0	0	16	0	1	1	INF	1	0.3	0.8	INF	1	INF	0	0.4	0
Dn1_749	3_Junction_15033_Junction_15035_Junction_15036	Spn	chr3L:2508907-2511161	3_Junction_15033_Junction_15035_Junction_15036	0.05704	13.9709	0.7562	0.0389891	16	reads okay	FALSE	CYCLE	#N/A	7.667	7	7	0	3	15	15	8	0	1	23	16	0	0.7	0.4375	0	0.75	0.3571	0.2679	0.5	0	0.5	0.7667	0.3077	0
Dn1_7490	5_Junction_20878_Junction_20879	cnc	chr3R:19035605-19048517	5_Junction_20878_Junction_20879	0.516273	18.2752	0.0386	0.523397	24	reads okay	CYCLE	FALSE	#N/A	10	0	0	0	0	14	2	0	0	0	4	24	1	0	0	INF	0	0.7	0.2	INF	0	INF	1	0.6	1
Dn1_750	3_Junction_15033_Junction_15035_Junction_15036	Spn	chr3L:2508907-2511161	3_Junction_15033_Junction_15035_Junction_15036	0.147982	17.1405	0.4888	1	20.5333	reads okay	FALSE	FALSE	#N/A	5	1	0	0	0	13	18	0	0	1	2	18	0	0.1	0	0	0	0.3095	0.3214	0	0	0.5	0.0667	0.3462	0
Dn1_751	3_Junction_15033_Junction_15035_Junction_15036	Spn	chr3L:2508907-2511161	3_Junction_15033_Junction_15035_Junction_15036	0.130119	3.58247	0.5141	0.523397	18	reads okay	FALSE	FALSE	#N/A	10	2	9	3	1	14	23	8	2	0	5	18	1	0.2	0.5625	1	0.25	0.3333	0.4107	0.5	1	0	0.1667	0.3462	1
Dn1_752	3_Junction_15066_Junction_15067	msn	chr3L:2563959-2564395	3_Junction_15066_Junction_15067	0.633998	21.7575	0.0194	0.113556	24	reads okay	CYCLE	FALSE	#N/A	10	2	1	0	0	20	9	2	0	0	9	24	7	0.5	0.5	INF	0	0.7407	0.8182	1	INF	INF	0.8182	0.6316	1
Dn1_753	3_Junction_15066_Junction_15067	msn	chr3L:2563959-2564395	3_Junction_15066_Junction_15067	0.0815158	15.4842	0.7196	1	20.5333	FALSE	FALSE	FALSE	#N/A	10	2	1	0	2	7	2	0	0	0	2	14	0	0.5	0.5	INF	1	0.2593	0.1818	0	INF	INF	0.1818	0.3684	0
Dn1_7538	5_Junction_21385_Junction_21386	CG13624	chr3R:20388664-20402184	5_Junction_21385_Junction_21386	0.616997	18.6651	0.019	0.354287	24	reads okay	CYCLE	FALSE	#N/A	10	3	0	0	3	23	9	0	0	0	1	19	4	0.6	0	INF	1	0.7931	0.4091	0	0	0	0.5	0.5588	1
Dn1_7539	5_Junction_21385_Junction_21386	CG13624	chr3R:20388664-20402184	5_Junction_21385_Junction_21386	0.377742	5.20246	0.1236	1	20.5333	reads okay	FALSE	FALSE	#N/A	10	2	2	0	0	6	13	6	2	1	1	15	0	0.4	1	INF	0	0.2069	0.5909	1	1	1	0.5	0.4412	0
Dn1_7546	5_Junction_21441_Junction_21442	slo	chr3R:20513019-20515042	5_Junction_21441_Junction_21442	0.344948	20.1961	0.1402	0.0389891	22	reads okay	FALSE	CYCLE	#N/A	10	6	0	0	9	46	45	6	0	4	5	76	9	0.1429	0	0	0.375	0.575	0.45	1	0	0.1176	0.3846	0.5672	0.1915
Dn1_7547	5_Junction_21441_Junction_21442	slo	chr3R:20513019-20515042	5_Junction_21441_Junction_21442	0.344948	8.19612	0.1402	0.0389891	22	reads okay	FALSE	CYCLE	#N/A	10	36	15	3	15	34	55	0	11	30	8	58	38	0.8571	1	1	0.625	0.425	0.55	0	1	0.8824	0.6154	0.4328	0.8085
Dn1_7598	5_Junction_22074_Junction_22075	Rb97D	chr3R:22699720-22699791	5_Junction_22074_Junction_22075	0.676399	18.0482	0.013	0.523397	23	reads okay	CYCLE	FALSE	#N/A	4	2	2	0	4	12	27	2	0	0	17	26	2	0.3333	0.5	INF	1	0.9231	0.9	0.25	INF	INF	0.9444	0.8667	0.5
Dn1_7599	5_Junction_22074_Junction_22075	Rb97D	chr3R:22699720-22699791	5_Junction_22074_Junction_22075	0.618353	1.43596	0.017	0.0212923	20	FALSE	FALSE	FALSE	#N/A	7.5	4	2	0	0	1	3	6	0	0	1	4	2	0.6667	0.5	INF	0	0.0769	0.1	0.75	INF	INF	0.0556	0.1333	0.5
Dn1_7619	5_Junction_22259_Junction_22260	Tusp	chr3R:23456948-23457012	5_Junction_22259_Junction_22260	0.351167	19.0166	0.141	1	20.5333	FALSE	FALSE	FALSE	#N/A	5	2	1	0	0	9	8	0	0	0	3	12	0	0.2	0.25	0	0	0.5	0.4211	0	0	0	0.3333	0.3871	INF
Dn1_7620	5_Junction_22259_Junction_22260	Tusp	chr3R:23456948-23457012	5_Junction_22259_Junction_22260	0.54377	8.55054	0.0187	0.0907868	24	reads okay	CYCLE	FALSE	#N/A	2	8	3	7	7	9	11	1	3	1	6	19	0	0.8	0.75	1	1	0.5	0.5789	1	1	1	0.6667	0.6129	INF
Dn1_7662	5_Junction_22511_Junction_22512	CG9990	chr3R:24508312-24515931	5_Junction_22511_Junction_22512	0.19419	1.0767	0.4062	0.425517	24	reads okay	FALSE	FALSE	mRNA cycles	1.48522	19	113	0	41	101	18	7	56	28	26	181	138	1	0.9496	INF	0.7193	0.6733	0.7826	1	0.9333	1	0.8966	0.7637	0.9388
Dn1_7663	5_Junction_22511_Junction_22512	CG9990	chr3R:24508312-24515931	5_Junction_22511_Junction_22512	0.638813	17.553	0.0131	0.283057	24	reads okay	CYCLE	FALSE	mRNA cycles	3.267	0	6	0	16	49	5	0	4	0	3	56	9	0	0.0504	INF	0.2807	0.3267	0.2174	0	0.0667	0	0.1034	0.2363	0.0612
Dn1_7684	5_Junction_22785_Junction_22786	CG11876	chr3R:24939877-24940814	5_Junction_22785_Junction_22786	0.507939	6.98032	0.0274	0.14801	24	reads okay	CYCLE	FALSE	mRNA cycles	6.87758	27	18	23	9	26	15	18	10	20	30	33	31	0.3971	0.3913	1	0.2143	0.1857	0.2055	0.4865	0.8333	0.4348	0.3297	0.1454	0.4493
Dn1_7685	5_Junction_22785_Junction_22786	CG11876	chr3R:24939877-24940814	5_Junction_22785_Junction_22786	0.507939	18.9803	0.0274	0.14801	24	reads okay	CYCLE	FALSE	mRNA cycles	8.546	41	28	0	33	114	58	19	2	26	61	194	38	0.6029	0.6087	0	0.7857	0.8143	0.7945	0.5135	0.1667	0.5652	0.6703	0.8546	0.5507
Dn1_7690	5_Junction_22820_Junction_22821_Junction_22822	CG14509	chr3R:24999716-25002275	5_Junction_22820_Junction_22821_Junction_22822	0.232349	6.47869	0.2998	1	20.5333	reads okay	FALSE	FALSE	#N/A	2.98721	122	42	79	29	120	90	99	12	5	88	118	8	0.6321	0.7241	0.4702	0.6744	0.3785	0.4167	0.6429	0.6	0.2632	0.6241	0.2987	0.2424
Dn1_7691	5_Junction_22820_Junction_22821_Junction_22822	CG14509	chr3R:24999716-25002275	5_Junction_22820_Junction_22821_Junction_22822	0.136327	11.1416	0.5086	1	20.5333	reads okay	FALSE	FALSE	#N/A	3.3957	39	10	79	6	103	63	38	6	9	30	141	6	0.2021	0.1724	0.4702	0.1395	0.3249	0.2917	0.2468	0.3	0.4737	0.2128	0.357	0.1818
Dn1_7692	5_Junction_22820_Junction_22821_Junction_22822	CG14509	chr3R:24999716-25002275	5_Junction_22820_Junction_22821_Junction_22822	0.52924	19.9138	0.0179	0.0389891	24	reads okay	CYCLE	CYCLE	#N/A	9.67731	32	6	10	8	94	63	17	2	5	23	136	19	0.1658	0.1034	0.0595	0.186	0.2965	0.2917	0.1104	0.1	0.2632	0.1631	0.3443	0.5758
Dn1_771	3_Junction_15182_Junction_15183_Junction_15184_Junction_15185	Shab	chr3L:2895284-2897242	3_Junction_15182_Junction_15183_Junction_15184_Junction_15185	0.520719	19.1922	0.0168	0.883281	24	reads okay	CYCLE	FALSE	mRNA cycles	2.545	0	0	0	0	12	10	0	0	0	0	14	0	0	0	INF	0	0.2308	0.2222	INF	0	0	0	0.2545	0
Dn1_772	3_Junction_15182_Junction_15183_Junction_15184_Junction_15185	Shab	chr3L:2895284-2897242	3_Junction_15182_Junction_15183_Junction_15184_Junction_15185	0.0342956	16.2688	0.8881	1	20.5333	reads okay	FALSE	FALSE	mRNA cycles	10	5	0	0	1	15	14	0	1	0	0	11	0	0.4545	0	INF	1	0.2885	0.3111	INF	0.5	0	0	0.2	0
Dn1_773	3_Junction_15182_Junction_15183_Junction_15184_Junction_15185	Shab	chr3L:2895284-2897242	3_Junction_15182_Junction_15183_Junction_15184_Junction_15185	0.0745502	23.4338	0.6833	1	20.5333	reads okay	FALSE	FALSE	mRNA cycles	10	6	3	0	0	15	21	0	1	0	3	21	1	0.5455	1	INF	0	0.2885	0.4667	INF	0.5	0	1	0.3818	1
Dn1_7736	5_Junction_23325_Junction_23326	CG1607	chr3R:27215920-27216309	5_Junction_23325_Junction_23326	0.200475	14.9618	0.3764	1	20.5333	reads okay	FALSE	FALSE	mRNA cycles	5.9988	4	11	0	16	26	22	16	3	9	7	36	9	0.1667	0.6111	INF	1	0.5417	0.3014	0.4848	0.2143	0.6923	0.5	0.5	0.45
Dn1_7737	5_Junction_23325_Junction_23326	CG1607	chr3R:27215920-27216309	5_Junction_23325_Junction_23326	0.527336	0.417602	0.0355	0.113556	22	reads okay	CYCLE	FALSE	mRNA cycles	8.333	20	7	0	0	22	51	17	11	4	7	36	11	0.8333	0.3889	INF	0	0.4583	0.6986	0.5152	0.7857	0.3077	0.5	0.5	0.55
Dn1_774	3_Junction_15182_Junction_15183_Junction_15184_Junction_15185	Shab	chr3L:2895284-2897242	3_Junction_15182_Junction_15183_Junction_15184_Junction_15185	0.141082	11.3702	0.7421	1	20.5333	FALSE	FALSE	FALSE	mRNA cycles	10	0	0	0	0	10	0	0	0	1	0	9	0	0	0	INF	0	0.1923	0	INF	0	1	0	0.1636	0
Dn1_7748	5_Junction_23473_Junction_23474	heph	chr3R:27707593-27784755	5_Junction_23473_Junction_23474	0.509579	1.35296	0.0387	0.0680175	24	reads okay	CYCLE	FALSE	#N/A	10	7	6	0	0	40	35	1	1	2	1	61	13	1	0.8571	INF	0	0.7692	0.8333	1	1	1	0.3333	0.8133	0.8667
Dn1_7749	5_Junction_23473_Junction_23474	heph	chr3R:27707593-27784755	5_Junction_23473_Junction_23474	0.466261	15.1163	0.0158	0.113556	24	reads okay	FALSE	FALSE	#N/A	10	0	1	0	5	12	7	0	0	0	2	14	2	0	0.1429	INF	1	0.2308	0.1667	0	0	0	0.6667	0.1867	0.1333
Dn1_7888	5_Junction_24198_Junction_24199	rump	chr3R:5333108-5335156	5_Junction_24198_Junction_24199	0.110279	22.3011	0.5874	0.113556	16	reads okay	FALSE	FALSE	#N/A	10	2	3	0	2	11	16	0	2	0	3	23	3	0.2222	0.5	INF	0.3333	0.4583	0.7619	0	1	INF	0.375	0.4792	0.6
Dn1_7889	5_Junction_24198_Junction_24199	rump	chr3R:5333108-5335156	5_Junction_24198_Junction_24199	0.195276	21.7828	0.3593	0.0109748	16	reads okay	FALSE	CYCLE	#N/A	10	7	3	0	4	13	5	8	0	0	5	25	2	0.7778	0.5	INF	0.6667	0.5417	0.2381	1	0	INF	0.625	0.5208	0.4
Dn1_7934	5_Junction_24669_Junction_24670	hth	chr3R:6439522-6464344	5_Junction_24669_Junction_24670	0.637505	18.6784	0.0192	0.23276	24	reads okay	CYCLE	FALSE	#N/A	10	4	1	0	1	12	10	0	1	0	2	14	2	0.3077	0.0833	0	1	0.7059	0.625	0	0.125	0	0.125	0.7368	0.6667
Dn1_7935	5_Junction_24669_Junction_24670	hth	chr3R:6439522-6464344	5_Junction_24669_Junction_24670	0.637505	6.67839	0.0192	0.23276	24	reads okay	CYCLE	FALSE	#N/A	10	9	11	10	0	5	6	7	7	2	14	5	1	0.6923	0.9167	1	0	0.2941	0.375	1	0.875	1	0.875	0.2632	0.3333
Dn1_8005	5_Junction_25447_Junction_25448	B52	chr3R:9488773-9491173	5_Junction_25447_Junction_25448	0.591041	19.8391	0.0302	0.23276	24	reads okay	CYCLE	FALSE	#N/A	5.152	5	0	0	2	30	19	0	0	6	0	45	17	0.1613	0	0	0.0741	0.3947	0.3585	INF	0	0.2727	0	0.4891	0.5152
Dn1_8006	5_Junction_25447_Junction_25448	B52	chr3R:9488773-9491173	5_Junction_25447_Junction_25448	0.42207	10.4224	0.0712	0.354287	22	reads okay	FALSE	FALSE	#N/A	2.06271	26	18	7	25	46	34	0	12	16	24	47	16	0.8387	1	1	0.9259	0.6053	0.6415	INF	1	0.7273	1	0.5109	0.4848
Dn1_801	3_Junction_15492_Junction_15493	enc	chr3L:3833670-3836020	3_Junction_15492_Junction_15493	0.484106	20.0665	0.0541	0.523397	22	reads okay	FALSE	FALSE	#N/A	8.889	24	0	0	2	22	36	0	2	0	9	41	4	0.8889	0	0	0.4	0.4783	0.5806	INF	0.25	0	0.6	0.6406	0.5714
Dn1_802	3_Junction_15492_Junction_15493	enc	chr3L:3833670-3836020	3_Junction_15492_Junction_15493	0.555963	10.0326	0.0306	0.0680175	18.6667	reads okay	CYCLE	FALSE	#N/A	9.0009	3	2	4	3	24	26	0	6	4	6	23	3	0.1111	1	1	0.6	0.5217	0.4194	INF	0.75	1	0.4	0.3594	0.4286
Dn1_8040	5_Junction_25730_Junction_25731	pan	chr4:115241-118446	5_Junction_25730_Junction_25731	0.127809	0.729485	0.7105	0.354287	24	reads okay	FALSE	FALSE	#N/A	1.49231	71	25	0	18	106	65	2	39	57	39	141	46	0.9342	0.9259	INF	0.8182	0.7681	0.6701	1	0.9512	0.9048	0.8478	0.7966	0.8364
Dn1_8041	5_Junction_25730_Junction_25731	pan	chr4:115241-118446	5_Junction_25730_Junction_25731	0.657587	18.6599	0.0077	0.0680175	24	reads okay	CYCLE	FALSE	#N/A	3.299	5	2	0	4	32	32	0	2	6	7	36	9	0.0658	0.0741	INF	0.1818	0.2319	0.3299	0	0.0488	0.0952	0.1522	0.2034	0.1636
Dn1_809	3_Junction_15564_Junction_15565	Gad1	chr3L:4084798-4085621	3_Junction_15564_Junction_15565	0.516707	13.8791	0.0378	0.0907868	22	reads okay	CYCLE	FALSE	#N/A	2.25023	4	3	12	5	115	80	0	0	60	6	181	16	0.4444	1	1	1	0.8333	0.8	INF	INF	1	1	0.7702	0.5161
Dn1_810	3_Junction_15564_Junction_15565	Gad1	chr3L:4084798-4085621	3_Junction_15564_Junction_15565	0.516368	22.4516	0.028	0.425517	22.6667	reads okay	CYCLE	FALSE	#N/A	5.556	5	0	0	0	23	20	0	0	0	0	54	15	0.5556	0	0	0	0.1667	0.2	INF	INF	0	0	0.2298	0.4839
Dn1_819	3_Junction_15698_Junction_15700	Cip4	chr3L:4324447-4324920	3_Junction_15698_Junction_15700	0.703945	19.7774	0.007	0.354287	24	reads okay	CYCLE	FALSE	#N/A	10	6	0	0	5	10	11	3	0	0	3	13	2	0.6667	INF	INF	1	0.5882	0.9167	0.6	INF	0	0.75	0.6842	1
Dn1_820	3_Junction_15698_Junction_15700	Cip4	chr3L:4324447-4324920	3_Junction_15698_Junction_15700	0.0246103	12.2804	0.9383	1	20.5333	FALSE	FALSE	FALSE	#N/A	10	3	0	0	0	7	1	2	0	1	1	6	0	0.3333	INF	INF	0	0.4118	0.0833	0.4	INF	1	0.25	0.3158	0
Dn1_8267	5_Junction_26302_Junction_26303	Slip1	chr4:687558-689754	5_Junction_26302_Junction_26303	0.519954	21.7629	0.008	0.0535033	20	reads okay	CYCLE	FALSE	#N/A	2.1427	16	17	0	10	56	27	2	7	11	10	61	9	0.8421	0.68	INF	0.625	0.8615	0.8182	1	0.4667	0.7333	0.7692	0.8472	1
Dn1_8268	5_Junction_26302_Junction_26303	Slip1	chr4:687558-689754	5_Junction_26302_Junction_26303	0.205944	9.366	0.3627	1	20.5333	FALSE	FALSE	FALSE	#N/A	5.333	3	8	0	6	9	6	0	8	4	3	11	0	0.1579	0.32	INF	0.375	0.1385	0.1818	0	0.5333	0.2667	0.2308	0.1528	0
Dn1_8375	5_Junction_26695_Junction_26696_Junction_26697	Hk	chrX:10149623-10152909	5_Junction_26695_Junction_26696_Junction_26697	0.0637585	1.95236	0.7437	1	20.5333	reads okay	FALSE	FALSE	#N/A	9.49147	28	23	14	22	22	26	30	2	2	13	36	3	0.3636	0.3898	0.4	0.3929	0.2444	0.2889	0.6122	0.08	0.0645	0.194	0.2903	0.1154
Dn1_8376	5_Junction_26695_Junction_26696_Junction_26697	Hk	chrX:10149623-10152909	5_Junction_26695_Junction_26696_Junction_26697	0.612208	19.9174	0.02	0.0680175	22	reads okay	CYCLE	FALSE	#N/A	4.113	18	9	0	2	34	35	3	1	0	17	51	4	0.2338	0.1525	0	0.0357	0.3778	0.3889	0.0612	0.04	0	0.2537	0.4113	0.1538
Dn1_8377	5_Junction_26695_Junction_26696_Junction_26697	Hk	chrX:10149623-10152909	5_Junction_26695_Junction_26696_Junction_26697	0.346721	9.14101	0.1463	0.113556	20	reads okay	FALSE	FALSE	#N/A	3.13505	31	27	21	32	34	29	16	22	29	37	37	19	0.4026	0.4576	0.6	0.5714	0.3778	0.3222	0.3265	0.88	0.9355	0.5522	0.2984	0.7308
Dn1_8441	5_Junction_26959_Junction_26960	CG43901	chrX:10808929-10809825	5_Junction_26959_Junction_26960	0.725337	19.6354	0.0093	0.23276	24	reads okay	CYCLE	FALSE	#N/A	10	2	0	0	4	18	22	9	0	0	5	24	5	0.2	0	0	1	0.9	0.8462	1	0	0	0.5556	0.8276	1
Dn1_8442	5_Junction_26959_Junction_26960	CG43901	chrX:10808929-10809825	5_Junction_26959_Junction_26960	0.725337	7.63543	0.0093	0.23276	24	FALSE	FALSE	FALSE	#N/A	10	8	5	16	0	2	4	0	1	1	4	5	0	0.8	1	1	0	0.1	0.1538	0	1	1	0.4444	0.1724	0
Dn1_8459	5_Junction_27076_Junction_27077	CG3638	chrX:1128312-1130476	5_Junction_27076_Junction_27077	0.502928	20.3111	0.0067	0.0389891	24	reads okay	CYCLE	CYCLE	mRNA cycles	10	17	5	1	10	14	12	3	0	1	6	34	2	0.3542	0.1724	0.1429	0.3125	0.2917	0.375	0.1579	0	0.1429	0.3333	0.4658	1
Dn1_8460	5_Junction_27076_Junction_27077	CG3638	chrX:1128312-1130476	5_Junction_27076_Junction_27077	0.502928	8.31108	0.0067	0.0389891	24	reads okay	CYCLE	CYCLE	mRNA cycles	10	31	24	6	22	34	20	16	4	6	12	39	0	0.6458	0.8276	0.8571	0.6875	0.7083	0.625	0.8421	1	0.8571	0.6667	0.5342	0
Dn1_847	3_Junction_15909_Junction_15910	sif	chr3L:5652781-5660920	3_Junction_15909_Junction_15910	0.703561	16.1384	0.0054	0.0301407	22	reads okay	CYCLE	CYCLE	#N/A	10	2	0	0	7	24	26	0	0	2	11	37	4	0.2857	0	INF	1	0.5714	0.4	0	0	0.5	0.6471	0.6167	0.2667
Dn1_848	3_Junction_15909_Junction_15910	sif	chr3L:5652781-5660920	3_Junction_15909_Junction_15910	0.701954	2.49204	0.0058	0.0161336	22	reads okay	CYCLE	CYCLE	#N/A	10	5	8	0	0	18	39	5	3	2	6	23	11	0.7143	1	INF	0	0.4286	0.6	1	1	0.5	0.3529	0.3833	0.7333
Dn1_8532	5_Junction_27500_Junction_27501	CG32647	chrX:12678555-12678840	5_Junction_27500_Junction_27501	0.196431	12.5237	0.4108	1	20.5333	reads okay	FALSE	FALSE	#N/A	5.50055	4	3	0	2	13	11	0	0	6	19	14	3	0.2353	0.4286	INF	0.1818	0.2407	0.22	INF	INF	1	0.76	0.2593	0.2308
Dn1_8533	5_Junction_27500_Junction_27501	CG32647	chrX:12678555-12678840	5_Junction_27500_Junction_27501	0.513625	20.0299	0.0438	0.283057	24	reads okay	CYCLE	FALSE	#N/A	8.182	13	4	0	9	41	39	0	0	0	6	40	10	0.7647	0.5714	INF	0.8182	0.7593	0.78	INF	INF	0	0.24	0.7407	0.7692
Dn1_8570	5_Junction_27842_Junction_27843	inaE	chrX:13698454-13700563	5_Junction_27842_Junction_27843	0.597361	20.4503	0.0286	0.0389891	24	reads okay	CYCLE	CYCLE	#N/A	10	7	10	0	1	22	29	0	0	0	8	36	6	0.7778	0.625	INF	0.2	1	0.9062	0	INF	INF	0.6667	0.7347	1
Dn1_8571	5_Junction_27842_Junction_27843	inaE	chrX:13698454-13700563	5_Junction_27842_Junction_27843	0.00497184	2.2754	0.976	1	20.5333	FALSE	FALSE	FALSE	#N/A	10	2	6	0	4	0	3	5	0	0	4	13	0	0.2222	0.375	INF	0.8	0	0.0938	1	INF	INF	0.3333	0.2653	0
Dn1_870	3_Junction_15924_Junction_15925	sif	chr3L:5668308-5669375	3_Junction_15924_Junction_15925	0.736967	20.7108	0.0068	0.14801	24	reads okay	CYCLE	FALSE	#N/A	10	8	0	0	5	61	61	12	0	0	2	72	7	0.8	0	INF	1	0.7722	0.9242	1	0	0	0.4	0.809	1
Dn1_871	3_Junction_15924_Junction_15925	sif	chr3L:5668308-5669375	3_Junction_15924_Junction_15925	0.401338	8.12583	0.1174	1	20.5333	reads okay	FALSE	FALSE	#N/A	10	2	5	0	0	18	5	0	9	6	3	17	0	0.2	1	INF	0	0.2278	0.0758	0	1	1	0.6	0.191	0
Dn1_874	3_Junction_15986_Junction_15987	scny	chr3L:5767176-5768287	3_Junction_15986_Junction_15987	0.599351	20.5281	0.0054	0.0301407	24	reads okay	CYCLE	CYCLE	#N/A	2.5	14	11	0	20	29	23	14	2	0	13	54	3	0.875	0.7857	INF	0.9091	0.9062	1	0.7	0.4	INF	1	0.9643	1
Dn1_875	3_Junction_15986_Junction_15987	scny	chr3L:5767176-5768287	3_Junction_15986_Junction_15987	0.382869	4.7493	0.0783	1	20.5333	FALSE	FALSE	FALSE	#N/A	6	2	3	0	2	3	0	6	3	0	0	2	0	0.125	0.2143	INF	0.0909	0.0938	0	0.3	0.6	INF	0	0.0357	0
Dn1_8920	5_Junction_28296_Junction_28297	Mur2B	chrX:1421604-1440615	5_Junction_28296_Junction_28297	0.539293	10.0687	0.0278	0.00530303	16	FALSE	FALSE	FALSE	#N/A	4	2	5	4	9	1	1	6	6	2	9	0	1	0.25	0.4167	1	0.6923	0.3333	0.3333	0.4615	0.4615	1	0.6	INF	0.5
Dn1_8921	5_Junction_28296_Junction_28297	Mur2B	chrX:1421604-1440615	5_Junction_28296_Junction_28297	0.463324	0.407706	0.0719	0.182464	20	FALSE	FALSE	FALSE	#N/A	7.5	6	7	0	4	2	2	7	7	0	6	0	1	0.75	0.5833	0	0.3077	0.6667	0.6667	0.5385	0.5385	0	0.4	INF	0.5
Dn1_918	3_Junction_16462_Junction_16463	Dscam2	chr3L:7156279-7156850	3_Junction_16462_Junction_16463	0.507652	10.525	0.0447	0.425517	20.8	reads okay	CYCLE	FALSE	#N/A	3.51617	31	19	76	10	87	103	29	7	8	50	143	3	0.2844	0.5	1	0.8333	0.537	0.5124	0.7838	0.875	1	0.7143	0.5608	0.6
Dn1_919	3_Junction_16462_Junction_16463	Dscam2	chr3L:7156279-7156850	3_Junction_16462_Junction_16463	0.507652	22.525	0.0447	0.425517	20.8	reads okay	CYCLE	FALSE	#N/A	7.156	78	19	0	2	75	98	8	1	0	20	112	2	0.7156	0.5	0	0.1667	0.463	0.4876	0.2162	0.125	0	0.2857	0.4392	0.4
Dn1_9255	5_Junction_28801_Junction_28802	Rab3-GEF	chrX:14989246-14991487	5_Junction_28801_Junction_28802	0.732025	19.9834	0.0067	0.0907868	24	reads okay	CYCLE	FALSE	#N/A	10	5	0	0	0	16	10	0	0	0	5	23	5	0.625	0	INF	0	0.8	0.5263	INF	0	0	0.4167	1	0.8333
Dn1_9256	5_Junction_28801_Junction_28802	Rab3-GEF	chrX:14989246-14991487	5_Junction_28801_Junction_28802	0.315932	8.97511	0.181	0.621276	20	FALSE	FALSE	FALSE	#N/A	10	3	6	0	2	4	9	0	2	2	7	0	1	0.375	1	INF	1	0.2	0.4737	INF	1	1	0.5833	0	0.1667
Dn1_930	3_Junction_16602_Junction_16604_Junction_16606	Ank2	chr3L:7649303-7655569	3_Junction_16602_Junction_16604_Junction_16606	0.329764	7.47523	0.1695	1	20.5333	reads okay	FALSE	FALSE	mRNA cycles	2.27841	39	36	17	39	59	88	21	38	42	52	74	25	0.3362	0.766	0.34	0.6	0.3831	0.3929	0.4375	0.6667	0.7119	0.3377	0.3592	0.5
Dn1_931	3_Junction_16602_Junction_16604_Junction_16606	Ank2	chr3L:7649303-7655569	3_Junction_16602_Junction_16604_Junction_16606	0.512613	19.5018	0.0443	0.14801	22	reads okay	CYCLE	FALSE	mRNA cycles	4.466	51	4	0	14	63	77	6	10	14	53	92	13	0.4397	0.0851	0	0.2154	0.4091	0.3438	0.125	0.1754	0.2373	0.3442	0.4466	0.26
Dn1_932	3_Junction_16602_Junction_16604_Junction_16606	Ank2	chr3L:7649303-7655569	3_Junction_16602_Junction_16604_Junction_16606	0.00574007	7.70576	0.9805	1	20.5333	reads okay	FALSE	FALSE	mRNA cycles	12.9921	26	7	33	12	32	59	21	9	3	49	40	12	0.2241	0.1489	0.66	0.1846	0.2078	0.2634	0.4375	0.1579	0.0508	0.3182	0.1942	0.24
Dn1_9350	5_Junction_29531_Junction_29532	Arp2	chrX:16444498-16446371	5_Junction_29531_Junction_29532	0.651702	17.6603	0.0128	0.0680175	24	reads okay	CYCLE	FALSE	#N/A	7.46	0	0	0	1	29	13	0	0	0	10	47	0	INF	0	0	0.1111	0.725	0.52	0	INF	INF	0.625	0.746	0
Dn1_9351	5_Junction_29531_Junction_29532	Arp2	chrX:16444498-16446371	5_Junction_29531_Junction_29532	0.00369525	1.85937	0.9821	1	20.5333	reads okay	FALSE	FALSE	#N/A	3.93701	0	5	5	8	11	12	5	0	0	6	16	5	INF	1	1	0.8889	0.275	0.48	1	INF	INF	0.375	0.254	1
Dn1_944	3_Junction_16644_Junction_16645	Clk	chr3L:7761958-7763121	3_Junction_16644_Junction_16645	0.854027	21.188	0.0014	0.0389891	24	reads okay	CYCLE	CYCLE	#N/A	6.957	9	0	0	0	11	14	4	0	0	0	16	9	0.375	INF	INF	INF	0.5789	0.4516	0.3636	0	0	0	0.6957	0.6923
Dn1_945	3_Junction_16644_Junction_16645	Clk	chr3L:7761958-7763121	3_Junction_16644_Junction_16645	0.0245585	5.19759	0.8897	1	20.5333	FALSE	FALSE	FALSE	#N/A	3.28623	15	0	0	0	8	17	7	9	3	1	7	4	0.625	INF	INF	INF	0.4211	0.5484	0.6364	1	1	1	0.3043	0.3077
Dn1_9466	5_Junction_30312_Junction_30313	east	chrX:1913539-1913602	5_Junction_30312_Junction_30313	0.664363	18.4061	0.0114	0.283057	24	reads okay	CYCLE	FALSE	#N/A	10	5	0	0	5	15	5	0	0	0	1	14	2	0.3846	INF	INF	0.625	0.6	0.5556	0	INF	INF	1	0.56	1
Dn1_9467	5_Junction_30312_Junction_30313	east	chrX:1913539-1913602	5_Junction_30312_Junction_30313	0.329197	22.8765	0.1443	0.182464	18	FALSE	FALSE	FALSE	#N/A	10	8	0	0	3	10	4	14	0	0	0	11	0	0.6154	INF	INF	0.375	0.4	0.4444	1	INF	INF	0	0.44	0
Dn1_9468	5_Junction_3031_Junction_3032	kis	chr2L:218885-226114	5_Junction_3031_Junction_3032	0.654228	20.3328	0.0063	0.283057	24	reads okay	CYCLE	FALSE	#N/A	5	0	0	0	0	5	12	0	0	0	0	16	2	0	0	INF	0	0.2174	0.2667	INF	0	INF	0	0.3478	0.5
Dn1_9469	5_Junction_3031_Junction_3032	kis	chr2L:218885-226114	5_Junction_3031_Junction_3032	0.0298542	19.3415	0.857	1	20.5333	reads okay	FALSE	FALSE	#N/A	2	10	9	0	5	18	33	0	15	0	7	30	2	1	1	INF	1	0.7826	0.7333	INF	1	INF	1	0.6522	0.5
Dn1_9670	5_Junction_30948_Junction_30949	Ntf-2	chrX:20907664-20909771	5_Junction_30948_Junction_30949	0.650576	20.3199	0.0119	0.00236091	20	reads okay	CYCLE	CYCLE	#N/A	3.626	17	0	0	8	23	9	4	0	0	2	33	3	0.2656	0	0	0.127	0.2614	0.2195	0.1481	0	0	0.0645	0.3626	0.0968
Dn1_9671	5_Junction_30948_Junction_30949	Ntf-2	chrX:20907664-20909771	5_Junction_30948_Junction_30949	0.650576	8.31986	0.0119	0.00236091	20	reads okay	CYCLE	CYCLE	#N/A	1.56887	47	36	7	55	65	32	23	34	16	29	58	28	0.7344	1	1	0.873	0.7386	0.7805	0.8519	1	1	0.9355	0.6374	0.9032
Dn1_9689	5_Junction_31157_Junction_31158	l(1)G0196	chrX:21900455-21904470	5_Junction_31157_Junction_31158	0.0232183	3.74233	0.8967	1	20.5333	FALSE	FALSE	FALSE	#N/A	8.33333	7	7	0	1	8	3	7	13	0	5	11	3	0.7778	0.7	INF	1	0.381	0.12	0.5833	0.8667	INF	0.7143	0.3548	0.5
Dn1_9690	5_Junction_31157_Junction_31158	l(1)G0196	chrX:21900455-21904470	5_Junction_31157_Junction_31158	0.750612	21.2101	0.0031	0.0212923	24	reads okay	CYCLE	CYCLE	#N/A	8.8	2	3	0	0	13	22	5	2	0	2	20	3	0.2222	0.3	INF	0	0.619	0.88	0.4167	0.1333	INF	0.2857	0.6452	0.5
Dn1_2029	3_Junction_24903_Junction_24904	Jupiter	chr3R:7429961-7430306	3_Junction_24903_Junction_24904	0.535044	19.9723	0.0378	0.354287	22.6667	reads okay	CYCLE	FALSE	mRNA cycles	6.857	27	11	0	19	38	46	2	4	7	21	72	17	0.6136	0.3793	0	0.4419	0.4578	0.6216	0.1538	0.1667	0.175	0.4773	0.6857	0.4359
Dn1_2030	3_Junction_24903_Junction_24904	Jupiter	chr3R:7429961-7430306	3_Junction_24903_Junction_24904	0.535044	7.97229	0.0378	0.283057	22	reads okay	CYCLE	FALSE	mRNA cycles	3.18167	17	18	13	24	45	28	11	20	33	23	33	22	0.3864	0.6207	1	0.5581	0.5422	0.3784	0.8462	0.8333	0.825	0.5227	0.3143	0.5641

## Sheet: PDF
cycling ID	junction ID	gene	locataion of longest junction	gene	junction ID	F24 score	phase	p-value F24	JTK p-valuse	JTK phase	>10 reads	F24 10 cycle	JTK 10 cycle	mRNA cycles	amplitude (if min is 0 amplitude is Max *10)	reads 2	reads 6	reads 10	reads 14	reads 18	reads 22	reads 26	reads 30	reads 34	reads 38	reads 42	reads 46	2 percentage usage	6 percentage usage	10 percentage usage	14 percentage usage	18 percentage usage	22 percentage usage	2 percentage usage	6 percentage usage	10 percentage usage	14 percentage usage	18 percentage usage	22 percentage usage
PDF_108	3_Junction_10465_Junction_10468	Mob2	chr3L:11520442-11554992	Mob2	3_Junction_10465_Junction_10468:001	0.512518	14.7351	0.0355	0.170691	24	reads okay	CYCLE	FALSE	#N/A	1.7001	14	5	30	46	34	20	33	58	26	10	48	21	1	1	0.7317	0.8364	0.7391	0.8696	1	1	1	0.5882	0.9412	1
PDF_109	3_Junction_10465_Junction_10468	Mob2	chr3L:11520442-11554992	Mob2	3_Junction_10465_Junction_10468:002	0.512518	3.4578	0.0356	0.170691	24	FALSE	FALSE	FALSE	#N/A	4.118	0	0	11	9	12	3	0	0	0	7	3	0	0	0	0.2683	0.1636	0.2609	0.1304	0	0	0	0.4118	0.0588	0
PDF_139	3_Junction_10797_Junction_10800	Wbp2	chr3L:12844253-12845525	Wbp2	3_Junction_10797_Junction_10800:001	0.581482	7.22141	0.0055	0.0498795	24	reads okay	CYCLE	CYCLE	#N/A	4.048	15	0	11	17	34	17	20	4	23	20	24	27	0.3061	0	0.2444	0.2982	0.3736	0.4048	0.2778	0.08	0.2738	0.2778	0.2727	0.3649
PDF_140	3_Junction_10797_Junction_10800	Wbp2	chr3L:12844253-12845525	Wbp2	3_Junction_10797_Junction_10800:002	0.581482	6.6551	0.0056	0.0498795	24	reads okay	CYCLE	CYCLE	#N/A	1.68011	34	16	34	40	57	25	52	46	61	52	64	47	0.6939	1	0.7556	0.7018	0.6264	0.5952	0.7222	0.92	0.7262	0.7222	0.7273	0.6351
PDF_227	3_Junction_11468_Junction_11469	Mbs	chr3L:16070909-16073857	Mbs	3_Junction_11468_Junction_11469:001	0.307277	18.502	0.2041	0.772989	20	FALSE	FALSE	FALSE	#N/A	10	0	0	3	8	4	0	4	4	3	0	6	4	INF	INF	0.375	0.3333	0.1667	0	0.1333	1	1	0	0.2727	0.1818
PDF_228	3_Junction_11468_Junction_11469	Mbs	chr3L:16070909-16073857	Mbs	3_Junction_11468_Junction_11469:002	0.576064	7.0849	0.032	0.312046	24	reads okay	CYCLE	FALSE	#N/A	10	0	0	5	16	20	15	26	0	0	10	16	18	INF	INF	0.625	0.6667	0.8333	1	0.8667	0	0	1	0.7273	0.8182
PDF_258	3_Junction_11778_Junction_11779	Rbp6	chr3L:17058808-17060235	Rbp6	3_Junction_11778_Junction_11779:001	0.495864	15.7369	0.0309	0.551671	24	reads okay	FALSE	FALSE	#N/A	4.45434	16	115	64	52	66	11	57	90	18	21	28	21	1	0.7931	0.3033	0.2419	0.375	0.2245	0.5278	0.5294	0.2769	0.3559	0.2887	0.3182
PDF_259	3_Junction_11778_Junction_11779	Rbp6	chr3L:17058808-17060235	Rbp6	3_Junction_11778_Junction_11779:002	0.500901	2.53772	0.0287	0.551671	24	reads okay	CYCLE	FALSE	#N/A	7.755	0	30	147	163	110	38	51	80	47	38	69	45	0	0.2069	0.6967	0.7581	0.625	0.7755	0.4722	0.4706	0.7231	0.6441	0.7113	0.6818
PDF_315	3_Junction_12280_Junction_12281	RhoGDI	chr3L:19924477-19925080	RhoGDI	3_Junction_12280_Junction_12281:001	0.578275	14.7621	0.0351	0.133807	24	reads okay	CYCLE	FALSE	#N/A	2.4264	55	39	39	113	56	55	91	144	44	17	70	62	0.7333	0.75	0.3305	0.4264	0.3916	0.4741	0.6594	0.6857	0.3636	0.3091	0.5983	0.4429
PDF_316	3_Junction_12280_Junction_12281	RhoGDI	chr3L:19924477-19925080	RhoGDI	3_Junction_12280_Junction_12281:002	0.578275	19.7868	0.0351	0.133807	24	reads okay	CYCLE	FALSE	#N/A	2.7636	20	13	79	152	87	61	47	66	77	38	47	78	0.2667	0.25	0.6695	0.5736	0.6084	0.5259	0.3406	0.3143	0.6364	0.6909	0.4017	0.5571
PDF_333	3_Junction_12536_Junction_12537	CG4825	chr3L:20515781-20516301	CG4825	3_Junction_12536_Junction_12537:001	0.572451	6.77673	0.0348	0.170691	24	reads okay	CYCLE	FALSE	mRNA cycles	3.908	0	0	8	4	26	6	1	1	1	2	16	34	0	0	0.2105	0.1212	0.3421	0.3	0.0222	0.0588	0.1	0.08	0.2759	0.3908
PDF_334	3_Junction_12536_Junction_12537	CG4825	chr3L:20515781-20516301	CG4825	3_Junction_12536_Junction_12537:002	0.572451	19.6093	0.0348	0.170691	24	reads okay	CYCLE	FALSE	mRNA cycles	1.6415	18	14	30	29	50	14	44	16	9	23	42	53	1	1	0.7895	0.8788	0.6579	0.7	0.9778	0.9412	0.9	0.92	0.7241	0.6092
PDF_335	3_Junction_12570_Junction_12572_Junction_12573_Junction_12574_Junction_12575	Pka-R1	chr3L:20809933-20825944	Pka-R1	3_Junction_12570_Junction_12572_Junction_12573_Junction_12574_Junction_12575:001	0.641517	10.7535	0.009	0.0221032	24	reads okay	CYCLE	CYCLE	mRNA cycles	24.8166	12	1	7	10	13	11	15	5	7	4	13	9	0.24	0.0169	0.1321	0.1087	0.325	0.2157	0.0882	0.0714	0.0636	0.093	0.4194	0.2143
PDF_336	3_Junction_12570_Junction_12572_Junction_12573_Junction_12574_Junction_12575	Pka-R1	chr3L:20809933-20825944	Pka-R1	3_Junction_12570_Junction_12572_Junction_12573_Junction_12574_Junction_12575:002	0.16643	4.56297	0.4468	1	22.1818	reads okay	FALSE	FALSE	mRNA cycles	2.712	0	16	2	7	1	2	7	6	18	8	5	4	0	0.2712	0.0377	0.0761	0.025	0.0392	0.0412	0.0857	0.1636	0.186	0.1613	0.0952
PDF_337	3_Junction_12570_Junction_12572_Junction_12573_Junction_12574_Junction_12575	Pka-R1	chr3L:20809933-20825944	Pka-R1	3_Junction_12570_Junction_12572_Junction_12573_Junction_12574_Junction_12575:003	0.0314747	13.2172	0.8643	1	22.1818	reads okay	FALSE	FALSE	mRNA cycles	7.02417	6	26	33	56	21	34	92	59	40	7	9	23	0.12	0.4407	0.6226	0.6087	0.525	0.6667	0.5412	0.8429	0.3636	0.1628	0.2903	0.5476
PDF_338	3_Junction_12570_Junction_12572_Junction_12573_Junction_12574_Junction_12575	Pka-R1	chr3L:20809933-20825944	Pka-R1	3_Junction_12570_Junction_12572_Junction_12573_Junction_12574_Junction_12575:004	0.321261	5.23702	0.1666	0.64774	20	FALSE	FALSE	FALSE	mRNA cycles	1.628	0	0	7	8	2	0	13	0	6	7	0	3	0	0	0.1321	0.087	0.05	0	0.0765	0	0.0545	0.1628	0	0.0714
PDF_339	3_Junction_12570_Junction_12572_Junction_12573_Junction_12574_Junction_12575	Pka-R1	chr3L:20809933-20825944	Pka-R1	3_Junction_12570_Junction_12572_Junction_12573_Junction_12574_Junction_12575:005	0.0686709	3.43861	0.7478	1	22.1818	reads okay	FALSE	FALSE	mRNA cycles	6.4	32	16	4	11	3	4	43	0	39	17	4	3	0.64	0.2712	0.0755	0.1196	0.075	0.0784	0.2529	0	0.3545	0.3953	0.129	0.0714
PDF_523	3_Junction_13999_Junction_14000	sif	chr3L:5652781-5660920	sif	3_Junction_13999_Junction_14000:001	0.734781	14.2207	0.0071	0.00804821	24	FALSE	FALSE	FALSE	mRNA cycles	10	5	4	6	6	6	8	4	13	11	0	6	4	1	1	0.3	0.2727	0.24	0.6154	1	1	0.3929	0	0.8571	0.8
PDF_524	3_Junction_13999_Junction_14000	sif	chr3L:5652781-5660920	sif	3_Junction_13999_Junction_14000:002	0.734781	21.1381	0.0071	0.00804821	24	reads okay	CYCLE	CYCLE	mRNA cycles	10	0	0	14	16	19	5	0	0	17	2	1	1	0	0	0.7	0.7273	0.76	0.3846	0	0	0.6071	1	0.1429	0.2
PDF_589	3_Junction_14137_Junction_14139	PVRAP	chr3L:6011250-6013158	PVRAP	3_Junction_14137_Junction_14139:001	0.606892	4.15236	0.0057	0.0392357	24	reads okay	CYCLE	CYCLE	#N/A	9.302	0	10	88	190	63	24	74	164	91	72	59	80	0	0.1923	0.7213	0.852	0.8289	0.8276	0.4868	0.5836	0.7845	0.9114	0.8429	0.9302
PDF_590	3_Junction_14137_Junction_14139	PVRAP	chr3L:6011250-6013158	PVRAP	3_Junction_14137_Junction_14139:002	0.606892	4.72623	0.0057	0.0392357	24	reads okay	CYCLE	CYCLE	#N/A	14.3266	200	42	34	33	13	5	78	117	25	7	11	6	1	0.8077	0.2787	0.148	0.1711	0.1724	0.5132	0.4164	0.2155	0.0886	0.1571	0.0698
PDF_638	3_Junction_14545_Junction_14548_Junction_14550	Ank2	chr3L:7649303-7655569	CG44195	3_Junction_14545_Junction_14548_Junction_14550:001	0.253877	4.5567	0.2762	0.25981	22	reads okay	FALSE	FALSE	#N/A	8.76418	6	28	23	45	64	18	42	37	53	38	41	71	0.1111	0.4746	0.6389	0.6618	0.6214	0.5806	0.5	0.9737	0.7681	0.7037	0.5325	0.6174
PDF_639	3_Junction_14545_Junction_14548_Junction_14550	Ank2	chr3L:7649303-7655569	CG44195	3_Junction_14545_Junction_14548_Junction_14550:002	0.211164	21.4692	0.3957	1	22.1818	FALSE	FALSE	FALSE	#N/A	4.444	24	23	6	9	7	1	9	0	4	4	6	8	0.4444	0.3898	0.1667	0.1324	0.068	0.0323	0.1071	0	0.058	0.0741	0.0779	0.0696
PDF_640	3_Junction_14545_Junction_14548_Junction_14550	Ank2	chr3L:7649303-7655569	CG44195	3_Junction_14545_Junction_14548_Junction_14550:003	0.639872	9.86504	0.0153	0.0498795	20	reads okay	CYCLE	CYCLE	#N/A	16.8973	24	8	7	14	32	12	33	1	12	12	30	36	0.4444	0.1356	0.1944	0.2059	0.3107	0.3871	0.3929	0.0263	0.1739	0.2222	0.3896	0.313
PDF_826	3_Junction_15401_Junction_15402	vnc	chr3L:9965497-9966192	vnc	3_Junction_15401_Junction_15402:001	0.501297	17.4546	0.0305	0.455603	24	reads okay	CYCLE	FALSE	#N/A	4	14	10	21	18	23	14	27	26	19	9	47	23	0.7368	0.5556	0.5833	0.2727	0.3108	0.25	0.4286	1	0.4524	0.2727	0.5054	0.3594
PDF_827	3_Junction_15401_Junction_15402	vnc	chr3L:9965497-9966192	vnc	3_Junction_15401_Junction_15402:002	0.501297	18.3878	0.0306	0.455603	24	reads okay	CYCLE	FALSE	#N/A	7.5	5	8	15	48	51	42	36	0	23	24	46	41	0.2632	0.4444	0.4167	0.7273	0.6892	0.75	0.5714	0	0.5476	0.7273	0.4946	0.6406
PDF_1007	3_Junction_17382_Junction_17383	Stat92E	chr3R:16363185-16364941	Stat92E	3_Junction_17382_Junction_17383:001	0.616214	1.27377	0.0224	0.066577	22	reads okay	CYCLE	FALSE	#N/A	9.231	0	0	4	25	14	17	8	0	20	12	27	5	INF	INF	0.5	0.7143	0.6364	0.7083	0.4706	0	0.8333	0.9231	0.6	0.2778
PDF_1008	3_Junction_17382_Junction_17383	Stat92E	chr3R:16363185-16364941	Stat92E	3_Junction_17382_Junction_17383:002	0.0359799	12.5175	0.8546	1	22.1818	FALSE	FALSE	FALSE	#N/A	13.0039	0	0	4	10	8	7	9	7	4	1	18	13	INF	INF	0.5	0.2857	0.3636	0.2917	0.5294	1	0.1667	0.0769	0.4	0.7222
PDF_1027	3_Junction_17659_Junction_17660	Ubpy	chr3R:16962038-16962435	Ubpy	3_Junction_17659_Junction_17660:001	0.94064	17.6589	0.0001	0.000702528	24	reads okay	CYCLE	CYCLE	mRNA cycles	4.94071	23	21	12	13	17	8	13	21	6	14	12	4	1	1	0.8571	0.2766	0.2024	0.2667	1	1	0.8571	0.3415	0.2264	0.3636
PDF_1028	3_Junction_17659_Junction_17660	Ubpy	chr3R:16962038-16962435	Ubpy	3_Junction_17659_Junction_17660:002	0.94064	4.72623	0.0001	0.000702528	24	reads okay	CYCLE	CYCLE	mRNA cycles	7.976	0	0	2	34	67	22	0	0	1	27	41	7	0	0	0.1429	0.7234	0.7976	0.7333	0	0	0.1429	0.6585	0.7736	0.6364
PDF_1050	3_Junction_17834_Junction_17835	CG34148	chr3R:17704141-17704207	CG34148	3_Junction_17834_Junction_17835:001	0.58177	0.709131	0.0194	0.0832745	24	reads okay	CYCLE	FALSE	#N/A	10	0	0	9	11	18	7	14	0	7	5	11	20	0	INF	0.6429	0.7857	0.8182	0.7778	0.6087	INF	0.7	1	0.55	0.9091
PDF_1051	3_Junction_17834_Junction_17835	CG34148	chr3R:17704141-17704207	CG34148	3_Junction_17834_Junction_17835:002	0.104407	14.2555	0.6854	1	22.1818	FALSE	FALSE	FALSE	#N/A	10	7	0	5	3	4	2	9	0	3	0	9	2	1	INF	0.3571	0.2143	0.1818	0.2222	0.3913	INF	0.3	0	0.45	0.0909
PDF_1069	3_Junction_17952_Junction_17954	Nrx-1	chr3R:18305442-18306516	Nrx-1	3_Junction_17952_Junction_17954:001	0.472669	10.5475	0.0137	0.0392357	20	reads okay	FALSE	CYCLE	mRNA cycles	10	28	0	4	6	9	7	13	4	0	0	2	11	1	0	0.0909	0.1935	0.1343	0.2917	0.4194	0.1379	0	INF	0.125	0.3548	#REF!
PDF_1070	3_Junction_17952_Junction_17954	Nrx-1	chr3R:18305442-18306516	Nrx-1	3_Junction_17952_Junction_17954:002	0.0668845	19.2738	0.7095	0.455603	20	reads okay	FALSE	FALSE	mRNA cycles	10	0	3	40	25	58	17	18	25	14	0	14	20	0	1	0.9091	0.8065	0.8657	0.7083	0.5806	0.8621	1	INF	0.875	0.6452
PDF_1190	3_Junction_19474_Junction_19475	tau	chr3R:23469695-23470945	tau	3_Junction_19474_Junction_19475:001	0.507357	5.32845	0.0389	0.133807	24	reads okay	CYCLE	FALSE	mRNA cycles	4.21958	30	30	57	37	102	28	45	15	26	15	81	72	0.3448	0.4545	0.5816	0.5286	0.5862	0.4375	0.3782	0.1471	0.3611	0.4688	0.5912	0.6207
PDF_1191	3_Junction_19474_Junction_19475	tau	chr3R:23469695-23470945	tau	3_Junction_19474_Junction_19475:002	0.507357	2.81442	0.0389	0.133807	24	reads okay	CYCLE	FALSE	mRNA cycles	2.24862	57	36	41	33	72	36	74	87	46	17	56	44	0.6552	0.5455	0.4184	0.4714	0.4138	0.5625	0.6218	0.8529	0.6389	0.5312	0.4088	0.3793
PDF_1397	3_Junction_20170_Junction_20172	sima	chr3R:25908043-25929823	sima	3_Junction_20170_Junction_20172:001	0.667073	5.19395	0.014	0.108541	24	FALSE	FALSE	FALSE	#N/A	10	0	0	0	2	7	2	2	0	1	2	6	2	0	0	0	1	0.3889	0.4	0.0714	0	0.1667	1	0.8571	1
PDF_1398	3_Junction_20170_Junction_20172	sima	chr3R:25908043-25929823	sima	3_Junction_20170_Junction_20172:002	0.667073	15.6944	0.014	0.108541	24	reads okay	CYCLE	FALSE	#N/A	10	6	4	6	0	11	3	26	35	5	0	1	0	1	1	1	0	0.6111	0.6	0.9286	1	0.8333	0	0.1429	0
PDF_1407	3_Junction_20364_Junction_20365	CG1607	chr3R:27208057-27212796	CG1607	3_Junction_20364_Junction_20365:001	0.302435	20.6199	0.2021	0.25981	24	FALSE	FALSE	FALSE	mRNA cycles	17.0068	5	0	5	4	3	1	33	21	19	4	3	3	1	INF	1	0.8	0.3333	0.0588	0.75	0.84	1	1	0.5	0.2727
PDF_1408	3_Junction_20364_Junction_20365	CG1607	chr3R:27208057-27212796	CG1607	3_Junction_20364_Junction_20365:002	0.736536	18.9891	0.0012	0.0118313	24	reads okay	CYCLE	CYCLE	mRNA cycles	9.412	0	0	0	1	6	16	11	4	0	0	3	8	0	INF	0	0.2	0.6667	0.9412	0.25	0.16	0	0	0.5	0.7273
PDF_1440	3_Junction_20688_Junction_20695	CG17816	chr3R:3685159-3689981	CG17816	3_Junction_20688_Junction_20695:001	0.824842	1.44741	0.0001	0.000163139	24	FALSE	FALSE	FALSE	mRNA cycles	10	0	3	5	8	8	3	11	23	19	3	13	4	0	0.5	0.625	1	0.5714	0.3333	0.2973	0.3538	0.5429	1	0.5417	0.2105
PDF_1441	3_Junction_20688_Junction_20695	CG17816	chr3R:3685159-3689981	CG17816	3_Junction_20688_Junction_20695:002	0.822338	14.8221	0.0001	0.000163139	24	reads okay	CYCLE	CYCLE	mRNA cycles	10	48	3	3	0	6	6	26	42	16	0	11	15	1	0.5	0.375	0	0.4286	0.6667	0.7027	0.6462	0.4571	0	0.4583	0.7895
PDF_1467	3_Junction_21167_Junction_21168	rump	chr3R:5333108-5335156	rump	3_Junction_21167_Junction_21168:001	0.602151	15.6688	0.0042	0.0156143	22	reads okay	CYCLE	CYCLE	#N/A	10	55	17	17	24	17	8	10	14	12	0	9	9	1	0.9444	0.6296	0.48	0.4722	0.6154	0.5882	0.6364	0.6316	0	0.36	0.6
PDF_1468	3_Junction_21167_Junction_21168	rump	chr3R:5333108-5335156	rump	3_Junction_21167_Junction_21168:002	0.602151	23.5459	0.0042	0.0156143	22	reads okay	CYCLE	CYCLE	#N/A	10	0	1	10	26	19	5	7	8	7	5	16	6	0	0.0556	0.3704	0.52	0.5278	0.3846	0.4118	0.3636	0.3684	1	0.64	0.4
PDF_1494	3_Junction_21487_Junction_21490	Syn	chr3R:6030038-6040692	Syn	3_Junction_21487_Junction_21490:001	0.751488	17.0133	0.0023	0.0118313	24	reads okay	CYCLE	CYCLE	#N/A	3.74953	75	42	21	20	23	15	37	11	27	6	12	26	0.8152	1	1	0.6452	0.4894	0.7143	1	1	0.871	0.375	0.2667	0.8966
PDF_1495	3_Junction_21487_Junction_21490	Syn	chr3R:6030038-6040692	Syn	3_Junction_21487_Junction_21490:002	0.74953	2.54993	0.0024	0.0118313	24	reads okay	CYCLE	CYCLE	#N/A	7.333	17	0	0	11	24	6	0	0	4	10	33	3	0.1848	0	0	0.3548	0.5106	0.2857	0	0	0.129	0.625	0.7333	0.1034
PDF_1527	3_Junction_21743_Junction_21745_Junction_21747	pros	chr3R:7155678-7165378	pros	3_Junction_21743_Junction_21745_Junction_21747:001	0.24312	16.6006	0.2829	1	22.1818	FALSE	FALSE	FALSE	#N/A	3.25098	0	0	12	6	8	0	1	0	0	4	4	10	INF	INF	0.5	0.1667	0.4211	INF	0.25	INF	INF	0.3077	0.1538	0.1923
PDF_1528	3_Junction_21743_Junction_21745_Junction_21747	pros	chr3R:7155678-7165378	pros	3_Junction_21743_Junction_21745_Junction_21747:002	0.644094	19.7358	0.0195	0.170691	24	reads okay	CYCLE	FALSE	#N/A	6.923	0	0	3	15	9	0	0	0	0	9	9	28	INF	INF	0.125	0.4167	0.4737	INF	0	INF	INF	0.6923	0.3462	0.5385
PDF_1529	3_Junction_21743_Junction_21745_Junction_21747	pros	chr3R:7155678-7165378	pros	3_Junction_21743_Junction_21745_Junction_21747:003	0.0432373	12.3547	0.8215	1	22.1818	reads okay	FALSE	FALSE	#N/A	7.5	0	0	9	15	2	0	3	0	0	0	13	14	INF	INF	0.375	0.4167	0.1053	INF	0.75	INF	INF	0	0.5	0.2692
PDF_1584	3_Junction_22270_Junction_22271	sqd	chr3R:9468931-9471473	sqd	3_Junction_22270_Junction_22271:001	0.527307	8.11853	0.0444	0.25981	24	reads okay	CYCLE	FALSE	#N/A	1.70678	12	18	48	89	97	38	49	58	17	20	98	46	1	0.6667	0.6957	0.8641	0.822	0.9048	0.6447	0.5859	0.5862	0.7407	0.9245	0.8364
PDF_1585	3_Junction_22270_Junction_22271	sqd	chr3R:9468931-9471473	sqd	3_Junction_22270_Junction_22271:002	0.527307	20	0.0443	0.25981	24	reads okay	CYCLE	FALSE	#N/A	4.141	0	9	21	14	21	4	27	41	12	7	8	9	0	0.3333	0.3043	0.1359	0.178	0.0952	0.3553	0.4141	0.4138	0.2593	0.0755	0.1636
PDF_1646	3_Junction_22604_Junction_22605	Caps	chr4:1254609-1259566	Caps	3_Junction_22604_Junction_22605:001	0.158592	13.963	0.4969	1	22.1818	reads okay	FALSE	FALSE	#N/A	1.68319	0	0	33	41	27	17	38	38	37	17	36	46	INF	INF	0.5789	0.7736	0.871	0.8947	0.9744	0.9744	0.6607	0.68	0.7347	0.7302
PDF_1647	3_Junction_22604_Junction_22605	Caps	chr4:1254609-1259566	Caps	3_Junction_22604_Junction_22605:002	0.559369	0.903946	0.0358	0.25981	22.6667	reads okay	CYCLE	FALSE	#N/A	16.4492	0	0	24	12	4	2	1	1	19	8	13	17	INF	INF	0.4211	0.2264	0.129	0.1053	0.0256	0.0256	0.3393	0.32	0.2653	0.2698
PDF_1685	3_Junction_22716_Junction_22717	Arl4	chr4:199462-199561	Arl4	3_Junction_22716_Junction_22717:001	0.531228	5.00528	0.0394	0.108541	24	reads okay	CYCLE	FALSE	#N/A	3.511	0	0	11	12	33	7	13	6	23	16	28	54	0	0	0.1429	0.1043	0.3511	0.1094	0.0963	0.0732	0.1825	0.2909	0.1761	0.3017
PDF_1686	3_Junction_22716_Junction_22717	Arl4	chr4:199462-199561	Arl4	3_Junction_22716_Junction_22717:002	0.531228	5.91555	0.0395	0.108541	24	reads okay	CYCLE	FALSE	#N/A	1.54107	12	7	66	103	61	57	122	76	103	39	131	125	1	1	0.8571	0.8957	0.6489	0.8906	0.9037	0.9268	0.8175	0.7091	0.8239	0.6983
PDF_1937	3_Junction_2380_Junction_2381	CG9328	chr2L:20798514-20813154	CG9328	3_Junction_2380_Junction_2381:001	0.640818	15.1912	0.011	0.0156143	20	reads okay	CYCLE	CYCLE	#N/A	6.9979	11	20	40	38	30	29	27	7	18	2	8	47	1	0.8333	0.5797	0.6909	0.4762	0.7632	0.6923	1	0.5455	0.1429	0.3333	0.7966
PDF_1938	3_Junction_2380_Junction_2381	CG9328	chr2L:20798514-20813154	CG9328	3_Junction_2380_Junction_2381:002	0.640818	5.413	0.011	0.0156143	20	reads okay	CYCLE	CYCLE	#N/A	8.571	0	4	29	17	33	9	12	0	15	12	16	12	0	0.1667	0.4203	0.3091	0.5238	0.2368	0.3077	0	0.4545	0.8571	0.6667	0.2034
PDF_1962	3_Junction_23959_Junction_23960	CG4004	chrX:12638982-12640900	CG4004	3_Junction_23959_Junction_23960:001	0.203187	14.7896	0.3477	0.898239	20	FALSE	FALSE	FALSE	#N/A	25	0	2	2	1	8	3	22	7	3	10	14	5	INF	1	0.1538	0.04	0.4706	0.5	0.88	1	0.0938	0.4	0.4667	0.2632
PDF_1963	3_Junction_23959_Junction_23960	CG4004	chrX:12638982-12640900	CG4004	3_Junction_23959_Junction_23960:002	0.5925	15.1994	0.0271	0.133807	24	reads okay	CYCLE	FALSE	#N/A	9.6	0	0	11	24	9	3	3	0	29	15	16	14	INF	0	0.8462	0.96	0.5294	0.5	0.12	0	0.9062	0.6	0.5333	0.7368
PDF_1964	3_Junction_23998_Junction_23999_Junction_24000	fne	chrX:12811843-12812608	fne	3_Junction_23998_Junction_23999_Junction_24000:001	0.531955	4.11403	0.0216	0.170691	24	FALSE	FALSE	FALSE	#N/A	0.962	0	0	6	5	10	4	2	0	4	5	2	6	0	0	0.0488	0.04	0.0474	0.044	0.0172	0	0.0426	0.0962	0.019	0.04
PDF_1965	3_Junction_23998_Junction_23999_Junction_24000	fne	chrX:12811843-12812608	fne	3_Junction_23998_Junction_23999_Junction_24000:002	0.599181	16.2752	0.0216	0.207575	24	reads okay	CYCLE	FALSE	#N/A	2.48206	34	80	75	63	133	55	89	58	41	24	36	65	0.7556	0.8511	0.6098	0.504	0.6303	0.6044	0.7672	0.7073	0.4362	0.4615	0.3429	0.4333
PDF_1966	3_Junction_23998_Junction_23999_Junction_24000	fne	chrX:12811843-12812608	fne	3_Junction_23998_Junction_23999_Junction_24000:003	0.499784	3.4782	0.0496	0.207575	24	reads okay	FALSE	FALSE	#N/A	4.28543	11	14	42	57	68	32	25	24	49	23	67	79	0.2444	0.1489	0.3415	0.456	0.3223	0.3516	0.2155	0.2927	0.5213	0.4423	0.6381	0.5267
PDF_2018	3_Junction_24247_Junction_24248_Junction_24249	rdgB	chrX:13656901-13661818	rdgB	3_Junction_24247_Junction_24248_Junction_24249:001	0.188527	2.12248	0.4134	1	22.1818	FALSE	FALSE	FALSE	mRNA cycles	7.778	0	13	3	3	0	1	0	0	0	7	4	2	0	0.3611	0.3	0.0909	0	0.1429	0	0	0	0.7778	0.3333	0.2222
PDF_2019	3_Junction_24247_Junction_24248_Junction_24249	rdgB	chrX:13656901-13661818	rdgB	3_Junction_24247_Junction_24248_Junction_24249:002	0.690298	14	0.009	0.0832745	22	reads okay	CYCLE	FALSE	mRNA cycles	9.33733	16	17	1	6	9	5	6	14	6	1	1	4	0.5517	0.4722	0.1	0.1818	0.3333	0.7143	0.5455	0.7778	0.2727	0.1111	0.0833	0.4444
PDF_2020	3_Junction_24247_Junction_24248_Junction_24249	rdgB	chrX:13656901-13661818	rdgB	3_Junction_24247_Junction_24248_Junction_24249:003	0.178382	5.30398	0.3999	0.551671	20	reads okay	FALSE	FALSE	mRNA cycles	6.54635	13	6	6	24	18	1	5	4	16	1	7	3	0.4483	0.1667	0.6	0.7273	0.6667	0.1429	0.4545	0.2222	0.7273	0.1111	0.5833	0.3333
PDF_2031	3_Junction_24296_Junction_24297	AMPdeam	chrX:13727055-13728846	AMPdeam	3_Junction_24296_Junction_24297:001	0.0803909	2.58607	0.6815	1	22.1818	reads okay	FALSE	FALSE	#N/A	9.583	8	15	33	23	17	6	0	8	12	0	5	23	0.4	0.5556	0.9167	0.7188	0.85	0.5	0	0.4	0.75	INF	0.625	0.9583
PDF_2032	3_Junction_24296_Junction_24297	AMPdeam	chrX:13727055-13728846	AMPdeam	3_Junction_24296_Junction_24297:002	0.521153	4.50594	0.0371	0.170691	24	reads okay	CYCLE	FALSE	#N/A	23.9808	12	12	3	9	3	6	2	12	4	0	3	1	0.6	0.4444	0.0833	0.2812	0.15	0.5	1	0.6	0.25	INF	0.375	0.0417
PDF_2427	3_Junction_26769_Junction_26770	sw	chrX:20101667-20103189	sw	3_Junction_26769_Junction_26770:001	0.558282	5.62317	0.028	0.170691	24	reads okay	CYCLE	FALSE	#N/A	8	0	18	10	21	19	9	8	2	12	2	15	16	INF	0.4286	0.4167	0.7241	0.5588	0.8182	0.5	0.125	0.8	1	0.8824	0.5
PDF_2428	3_Junction_26769_Junction_26770	sw	chrX:20101667-20103189	sw	3_Junction_26769_Junction_26770:002	0.235084	11.2738	0.2958	0.455603	20	reads okay	FALSE	FALSE	#N/A	8.75	0	24	14	8	15	2	8	14	3	0	2	16	INF	0.5714	0.5833	0.2759	0.4412	0.1818	0.5	0.875	0.2	0	0.1176	0.5
PDF_2446	3_Junction_26900_Junction_26903	bves	chrX:20947209-20951805	bves	3_Junction_26900_Junction_26903:001	0.506369	14.9154	0.0454	0.207575	22	reads okay	CYCLE	FALSE	#N/A	10	19	3	11	5	20	6	11	19	5	2	0	11	0.7037	1	0.2821	0.1316	0.625	0.6	0.4783	0.5938	0.2381	0.2	0	0.44
PDF_2447	3_Junction_26900_Junction_26903	bves	chrX:20947209-20951805	bves	3_Junction_26900_Junction_26903:002	0.512801	3.73012	0.0426	0.207575	22	reads okay	CYCLE	FALSE	#N/A	10	8	0	28	33	12	4	12	13	16	8	11	14	0.2963	0	0.7179	0.8684	0.375	0.4	0.5217	0.4062	0.7619	0.8	1	0.56
PDF_3129	3_Junction_2725_Junction_2727	CG42748	chr2L:22146996-22154796	CG42748	3_Junction_2725_Junction_2727:001	0.573262	18.0164	0.0174	0.00804821	24	FALSE	FALSE	FALSE	#N/A	10	5	16	2	2	2	0	7	10	4	1	0	4	1	0.8889	0.4	0.2	0.0952	0	0.2188	0.4	0.5714	0.2	0	0.1429
PDF_3130	3_Junction_2725_Junction_2727	CG42748	chr2L:22146996-22154796	CG42748	3_Junction_2725_Junction_2727:002	0.573262	16.7767	0.0174	0.00804821	24	reads okay	CYCLE	CYCLE	#N/A	10	0	2	3	8	19	3	25	15	3	4	16	24	0	0.1111	0.6	0.8	0.9048	1	0.7812	0.6	0.4286	0.8	1	0.8571
PDF_3680	3_Junction_3470_Junction_3471	pgant5	chr2L:5075829-5077533	pgant5	3_Junction_3470_Junction_3471:001	0.397513	12.324	0.1139	0.028592	20	reads okay	FALSE	CYCLE	#N/A	10	2	18	15	0	9	14	6	2	0	0	10	13	0.4	1	0.7895	0	0.6429	0.9333	0.75	1	0	INF	0.7692	1
PDF_3681	3_Junction_3470_Junction_3471	pgant5	chr2L:5075829-5077533	pgant5	3_Junction_3470_Junction_3471:002	0.139603	13.6056	0.516	0.898239	20	FALSE	FALSE	FALSE	#N/A	10	3	0	4	1	5	1	2	0	8	0	3	0	0.6	0	0.2105	1	0.3571	0.0667	0.25	0	1	INF	0.2308	0
PDF_3684	3_Junction_3529_Junction_3530	cype	chr2L:5327286-5327501	cype	3_Junction_3529_Junction_3530:001	0.650641	4.38784	0.0039	0.108541	22.6667	reads okay	CYCLE	FALSE	#N/A	1.9802	27	5	45	34	75	31	37	5	21	9	29	47	0.675	0.4545	0.7258	0.85	0.7732	0.7949	0.6379	0.5	0.8077	0.9	0.7632	0.7705
PDF_3685	3_Junction_3529_Junction_3530	cype	chr2L:5327286-5327501	cype	3_Junction_3529_Junction_3530:002	0.659639	13.7612	0.0037	0.108541	22.6667	reads okay	CYCLE	FALSE	#N/A	5.455	13	6	17	6	22	8	21	5	5	1	9	14	0.325	0.5455	0.2742	0.15	0.2268	0.2051	0.3621	0.5	0.1923	0.1	0.2368	0.2295
PDF_3823	3_Junction_4994_Junction_4995	CG43729	chr2R:11340513-11343938	CG43729	3_Junction_4994_Junction_4995:001	0.599017	14.4156	0.0043	0.0392357	22	reads okay	CYCLE	CYCLE	#N/A	9.167	32	22	5	5	5	6	22	64	11	0	9	8	0.8205	0.9167	0.625	0.2941	0.625	0.6667	0.7857	0.9014	0.4783	0	0.75	0.6667
PDF_3824	3_Junction_4994_Junction_4995	CG43729	chr2R:11340513-11343938	CG43729	3_Junction_4994_Junction_4995:002	0.606086	14.7535	0.0041	0.0392357	22	reads okay	CYCLE	CYCLE	#N/A	12.0048	7	2	3	12	3	3	6	7	12	14	3	4	0.1795	0.0833	0.375	0.7059	0.375	0.3333	0.2143	0.0986	0.5217	1	0.25	0.3333
PDF_3865	3_Junction_5217_Junction_5218	spin	chr2R:12020595-12023530	spin	3_Junction_5217_Junction_5218:001	0.157902	21.6809	0.4596	0.772989	20	reads okay	FALSE	FALSE	#N/A	10	0	13	10	8	14	5	5	19	0	4	22	8	0	1	0.7143	0.5714	0.3889	0.3571	0.1351	0.76	INF	0.4	0.3492	0.3077
PDF_3866	3_Junction_5217_Junction_5218	spin	chr2R:12020595-12023530	spin	3_Junction_5217_Junction_5218:002	0.591021	12.4206	0.0232	0.0118313	20	reads okay	CYCLE	CYCLE	#N/A	10	10	0	4	6	22	9	32	6	0	6	41	18	1	0	0.2857	0.4286	0.6111	0.6429	0.8649	0.24	INF	0.6	0.6508	0.6923
PDF_4192	3_Junction_7908_Junction_7909	Gr43a	chr2R:3280009-3280381	Gr43a	3_Junction_7908_Junction_7909:001	0.00739789	15.6406	0.962	1	22.1818	reads okay	FALSE	FALSE	#N/A	5.20156	0	16	10	43	8	24	37	0	27	17	4	29	INF	0.8	0.3333	0.4479	0.3333	0.5581	0.6727	INF	0.4909	0.4595	0.1538	0.7073
PDF_4193	3_Junction_7908_Junction_7909	Gr43a	chr2R:3280009-3280381	Gr43a	3_Junction_7908_Junction_7909:002	0.703212	18.8782	0.0063	0.028592	24	reads okay	CYCLE	CYCLE	#N/A	4.231	0	4	20	53	16	19	18	0	28	20	22	12	INF	0.2	0.6667	0.5521	0.6667	0.4419	0.3273	INF	0.5091	0.5405	0.8462	0.2927
PDF_4255	3_Junction_8531_Junction_8532	CG8248	chr2R:4806968-4807027	CG8248	3_Junction_8531_Junction_8532:001	0.631299	0.351852	0.0203	0.25981	22	reads okay	CYCLE	FALSE	mRNA cycles	4	6	7	15	15	16	2	0	6	8	7	19	6	0.2	0.1628	0.3333	0.375	0.2319	0.1	0	0.4	0.3478	0.35	0.3878	0.1034
PDF_4256	3_Junction_8531_Junction_8532	CG8248	chr2R:4806968-4807027	CG8248	3_Junction_8531_Junction_8532:002	0.626055	10	0.0212	0.25981	22	reads okay	CYCLE	FALSE	mRNA cycles	1.66667	24	36	30	25	53	18	26	9	15	13	30	52	0.8	0.8372	0.6667	0.625	0.7681	0.9	1	0.6	0.6522	0.65	0.6122	0.8966
PDF_4259	3_Junction_8629_Junction_8630	shrb	chr2R:5030741-5031123	shrb	3_Junction_8629_Junction_8630:001	0.510283	11.2738	0.0357	0.170691	22	reads okay	CYCLE	FALSE	#N/A	1.74394	74	52	38	39	81	34	72	48	37	15	77	78	0.74	0.8254	0.5938	0.6842	0.7788	0.85	0.9351	0.6761	0.5362	0.75	0.7404	0.75
PDF_4260	3_Junction_8629_Junction_8630	shrb	chr2R:5030741-5031123	shrb	3_Junction_8629_Junction_8630:002	0.510283	16.2447	0.0357	0.170691	22	reads okay	CYCLE	FALSE	#N/A	7.14638	26	11	26	18	23	6	5	23	32	5	27	26	0.26	0.1746	0.4062	0.3158	0.2212	0.15	0.0649	0.3239	0.4638	0.25	0.2596	0.25
PDF_4314	3_Junction_9091_Junction_9097_Junction_9103_Junction_9107_Junction_9111_Junction_9114_Junction_9115_Junction_9116	lola	chr2R:6376648-6419542	lola	3_Junction_9091_Junction_9097_Junction_9103_Junction_9107_Junction_9111_Junction_9114_Junction_9115_Junction_9116:001	0.308268	23.8531	0.1329	0.64774	24	FALSE	FALSE	FALSE	#N/A	14.7805	3	2	5	2	9	2	1	3	4	4	2	3	0.0162	0.0174	0.0394	0.0198	0.0466	0.0357	0.0123	0.033	0.093	0.1818	0.0208	0.0345
PDF_4315	3_Junction_9091_Junction_9097_Junction_9103_Junction_9107_Junction_9111_Junction_9114_Junction_9115_Junction_9116	lola	chr2R:6376648-6419542	lola	3_Junction_9091_Junction_9097_Junction_9103_Junction_9107_Junction_9111_Junction_9114_Junction_9115_Junction_9116:002	0.172032	6.27905	0.4318	1	22.1818	reads okay	FALSE	FALSE	#N/A	9.05758	24	26	23	12	24	11	24	3	8	3	16	26	0.1297	0.2261	0.1811	0.1188	0.1244	0.1964	0.2963	0.033	0.186	0.1364	0.1667	0.2989
PDF_4316	3_Junction_9091_Junction_9097_Junction_9103_Junction_9107_Junction_9111_Junction_9114_Junction_9115_Junction_9116	lola	chr2R:6376648-6419542	lola	3_Junction_9091_Junction_9097_Junction_9103_Junction_9107_Junction_9111_Junction_9114_Junction_9115_Junction_9116:003	0.226837	15.8164	0.3191	1	22.1818	reads okay	FALSE	FALSE	#N/A	30.5739	9	19	6	8	16	5	9	32	1	3	4	1	0.0486	0.1652	0.0472	0.0792	0.0829	0.0893	0.1111	0.3516	0.0233	0.1364	0.0417	0.0115
PDF_4317	3_Junction_9091_Junction_9097_Junction_9103_Junction_9107_Junction_9111_Junction_9114_Junction_9115_Junction_9116	lola	chr2R:6376648-6419542	lola	3_Junction_9091_Junction_9097_Junction_9103_Junction_9107_Junction_9111_Junction_9114_Junction_9115_Junction_9116:004	0.0576104	20.8235	0.7672	1	22.1818	reads okay	FALSE	FALSE	#N/A	1.95372	139	60	78	57	122	25	36	35	23	11	61	37	0.7514	0.5217	0.6142	0.5644	0.6321	0.4464	0.4444	0.3846	0.5349	0.5	0.6354	0.4253
PDF_4318	3_Junction_9091_Junction_9097_Junction_9103_Junction_9107_Junction_9111_Junction_9114_Junction_9115_Junction_9116	lola	chr2R:6376648-6419542	lola	3_Junction_9091_Junction_9097_Junction_9103_Junction_9107_Junction_9111_Junction_9114_Junction_9115_Junction_9116:005	0.371036	10	0.1206	0.455603	24	FALSE	FALSE	FALSE	#N/A	1.607	10	0	1	10	13	9	7	0	0	0	6	1	0.0541	0	0.0079	0.099	0.0674	0.1607	0.0864	0	0	0	0.0625	0.0115
PDF_4319	3_Junction_9091_Junction_9097_Junction_9103_Junction_9107_Junction_9111_Junction_9114_Junction_9115_Junction_9116	lola	chr2R:6376648-6419542	lola	3_Junction_9091_Junction_9097_Junction_9103_Junction_9107_Junction_9111_Junction_9114_Junction_9115_Junction_9116:006	0.164294	20.2003	0.454	1	22.1818	FALSE	FALSE	FALSE	#N/A	1.538	0	0	4	9	6	0	3	14	4	1	2	6	0	0	0.0315	0.0891	0.0311	0	0.037	0.1538	0.093	0.0455	0.0208	0.069
PDF_4320	3_Junction_9091_Junction_9097_Junction_9103_Junction_9107_Junction_9111_Junction_9114_Junction_9115_Junction_9116	lola	chr2R:6376648-6419542	lola	3_Junction_9091_Junction_9097_Junction_9103_Junction_9107_Junction_9111_Junction_9114_Junction_9115_Junction_9116:007	0.203125	6.43912	0.344	1	22.1818	FALSE	FALSE	FALSE	#N/A	0.805	0	1	5	3	3	3	0	4	0	0	5	7	0	0.0087	0.0394	0.0297	0.0155	0.0536	0	0.044	0	0	0.0521	0.0805
PDF_4321	3_Junction_9091_Junction_9097_Junction_9103_Junction_9107_Junction_9111_Junction_9114_Junction_9115_Junction_9116	lola	chr2R:6376648-6419542	lola	3_Junction_9091_Junction_9097_Junction_9103_Junction_9107_Junction_9111_Junction_9114_Junction_9115_Junction_9116:008	0.100796	22.2493	0.61	0.455603	20	FALSE	FALSE	FALSE	#N/A	0.698	0	7	5	0	0	1	1	0	3	0	0	6	0	0.0609	0.0394	0	0	0.0179	0.0123	0	0.0698	0	0	0.069
PDF_4322	3_Junction_9099_Junction_9109_Junction_9113	lola	chr2R:6394197-6426772	lola	3_Junction_9099_Junction_9109_Junction_9113:001	0.282397	7.70373	0.2242	0.898239	20	FALSE	FALSE	FALSE	#N/A	4.231	2	2	2	4	6	1	3	3	3	0	11	7	0.4	0.25	0.2857	0.1818	0.375	0.3333	0.1429	0.2308	0.1667	0	0.4231	0.3182
PDF_4323	3_Junction_9099_Junction_9109_Junction_9113	lola	chr2R:6394197-6426772	lola	3_Junction_9099_Junction_9109_Junction_9113:002	0.659981	17.3228	0.008	0.0832745	24	reads okay	CYCLE	FALSE	#N/A	2.25023	3	6	4	15	6	1	13	9	12	5	10	12	0.6	0.75	0.5714	0.6818	0.375	0.3333	0.619	0.6923	0.6667	0.625	0.3846	0.5455
PDF_4324	3_Junction_9099_Junction_9109_Junction_9113	lola	chr2R:6394197-6426772	lola	3_Junction_9099_Junction_9109_Junction_9113:003	0.385864	6.55761	0.1181	0.455603	24	FALSE	FALSE	FALSE	#N/A	3.75	0	0	1	3	4	1	5	1	3	3	5	3	0	0	0.1429	0.1364	0.25	0.3333	0.2381	0.0769	0.1667	0.375	0.1923	0.1364
PDF_4325	3_Junction_9137_Junction_9139	psq	chr2R:6449695-6498053	psq	3_Junction_9137_Junction_9139:001	0.50878	17.3372	0.0559	0.455603	20	FALSE	FALSE	FALSE	mRNA cycles	10	32	12	3	7	3	2	0	5	1	0	8	10	1	1	0.75	0.3333	0.1	0.0833	INF	1	1	0	0.3636	0.5882
PDF_4326	3_Junction_9137_Junction_9139	psq	chr2R:6449695-6498053	psq	3_Junction_9137_Junction_9139:002	0.79614	5.40345	0.0043	0.0498795	24	reads okay	CYCLE	CYCLE	mRNA cycles	10	0	0	1	14	27	22	0	0	0	5	14	7	0	0	0.25	0.6667	0.9	0.9167	INF	0	0	1	0.6364	0.4118
PDF_4432	3_Junction_9835_Junction_9836	Dh31-R	chr2R:9156598-9156895	Dh31-R	3_Junction_9835_Junction_9836:001	0.549912	17.225	0.0333	0.066577	24	reads okay	CYCLE	FALSE	#N/A	2.82646	20	29	16	36	55	15	20	20	32	30	23	27	1	0.8056	0.5161	0.4235	0.5046	0.375	0.5714	1	0.7111	0.6522	0.3538	0.675
PDF_4433	3_Junction_9835_Junction_9836	Dh31-R	chr2R:9156598-9156895	Dh31-R	3_Junction_9835_Junction_9836:002	0.550632	2.73508	0.0334	0.066577	24	reads okay	CYCLE	FALSE	#N/A	6.462	0	7	15	49	54	25	15	0	13	16	42	13	0	0.1944	0.4839	0.5765	0.4954	0.625	0.4286	0	0.2889	0.3478	0.6462	0.325
PDF_4773	5_Junction_1190_Junction_1191	Pect	chr2L:13208777-13209470	Pect	5_Junction_1190_Junction_1191:001	0.609179	16.803	0.0169	0.108541	24	reads okay	CYCLE	FALSE	#N/A	6.17333	6	10	11	3	11	6	18	50	27	3	28	11	0.4615	0.4167	0.22	0.075	0.1897	0.2143	0.2338	0.463	0.3506	0.1364	0.2545	0.1746
PDF_4774	5_Junction_1190_Junction_1191	Pect	chr2L:13208777-13209470	Pect	5_Junction_1190_Junction_1191:002	0.607478	23.7821	0.0173	0.108541	24	reads okay	CYCLE	FALSE	#N/A	1.72253	7	14	39	37	47	22	59	58	50	19	82	52	0.5385	0.5833	0.78	0.925	0.8103	0.7857	0.7662	0.537	0.6494	0.8636	0.7455	0.8254
PDF_4800	5_Junction_12279_Junction_12280	RhoGDI	chr3L:19924477-19925080	RhoGDI	5_Junction_12279_Junction_12280:001	0.684052	2.68885	0.0114	0.133807	24	reads okay	CYCLE	FALSE	#N/A	2.5688	20	13	70	118	78	47	45	60	69	29	62	57	0.2667	0.25	0.6422	0.5108	0.5821	0.4608	0.3309	0.2941	0.6106	0.6304	0.4697	0.479
PDF_4801	5_Junction_12279_Junction_12280	RhoGDI	chr3L:19924477-19925080	RhoGDI	5_Junction_12279_Junction_12280:002	0.684052	15.1564	0.0114	0.133807	24	reads okay	CYCLE	FALSE	#N/A	2.09614	55	39	39	113	56	55	91	144	44	17	70	62	0.7333	0.75	0.3578	0.4892	0.4179	0.5392	0.6691	0.7059	0.3894	0.3696	0.5303	0.521
PDF_4894	5_Junction_13018_Junction_13019	CG7369	chr3L:22735651-22738487	CG7369	5_Junction_13018_Junction_13019:001	0.585533	6.27236	0.026	0.133807	24	reads okay	CYCLE	FALSE	#N/A	10	0	0	0	13	9	8	6	6	0	0	11	7	INF	0	INF	0.65	0.6923	0.7273	1	0.3333	INF	INF	0.9167	1
PDF_4895	5_Junction_13018_Junction_13019	CG7369	chr3L:22735651-22738487	CG7369	5_Junction_13018_Junction_13019:002	0.137265	13.1653	0.5322	1	22.1818	FALSE	FALSE	FALSE	#N/A	10	0	4	0	7	4	3	0	12	0	0	1	0	INF	1	INF	0.35	0.3077	0.2727	0	0.6667	INF	INF	0.0833	0
PDF_4949	5_Junction_13372_Junction_13373	Shab	chr3L:2952107-2954683	Shab	5_Junction_13372_Junction_13373:001	0.692056	3.67804	0.0041	0.00596855	24	reads okay	CYCLE	CYCLE	mRNA cycles	4	14	16	19	10	22	10	15	64	26	15	12	21	0.25	0.5517	0.7037	0.7143	0.9565	0.7692	0.4839	0.6667	0.6667	1	0.9231	0.6364
PDF_4950	5_Junction_13372_Junction_13373	Shab	chr3L:2952107-2954683	Shab	5_Junction_13372_Junction_13373:002	0.692056	2.92653	0.0041	0.00596855	24	reads okay	CYCLE	CYCLE	mRNA cycles	7.5	42	13	8	4	1	3	16	32	13	0	1	12	0.75	0.4483	0.2963	0.2857	0.0435	0.2308	0.5161	0.3333	0.3333	0	0.0769	0.3636
PDF_5041	5_Junction_14136_Junction_14137_Junction_14138	PVRAP	chr3L:6011250-6013177	PVRAP	5_Junction_14136_Junction_14137_Junction_14138:001	0.630312	15.5112	0.0145	0.066577	24	reads okay	CYCLE	FALSE	#N/A	3.63504	94	33	45	74	40	15	260	369	80	31	64	38	1	0.7674	0.3169	0.2751	0.3883	0.375	0.745	0.6884	0.4678	0.301	0.5203	0.322
PDF_5042	5_Junction_14136_Junction_14137_Junction_14138	PVRAP	chr3L:6011250-6013177	PVRAP	5_Junction_14136_Junction_14137_Junction_14138:002	0.660846	6.92653	0.0094	0.028592	24	reads okay	CYCLE	CYCLE	#N/A	7.063	0	10	88	190	63	24	74	164	91	72	59	80	0	0.2326	0.6197	0.7063	0.6117	0.6	0.212	0.306	0.5322	0.699	0.4797	0.678
PDF_5043	5_Junction_14136_Junction_14137_Junction_14138	PVRAP	chr3L:6011250-6013177	PVRAP	5_Junction_14136_Junction_14137_Junction_14138:003	0.0485075	8	0.8243	1	22.1818	FALSE	FALSE	FALSE	#N/A	0.634	0	0	9	5	0	1	15	3	0	0	0	0	0	0	0.0634	0.0186	0	0.025	0.043	0.0056	0	0	0	0
PDF_5196	5_Junction_14782_Junction_14783_Junction_14784	Idh	chr3L:8351005-8353891	Idh	5_Junction_14782_Junction_14783_Junction_14784:001	0.3688	5.54588	0.0971	0.772989	24	FALSE	FALSE	FALSE	mRNA cycles	2.564	0	10	4	3	2	4	7	0	5	4	2	0	0	0.2564	0.129	0.0333	0.0137	0.0296	0.0843	0	0.102	0.1026	0.0132	0
PDF_5197	5_Junction_14782_Junction_14783_Junction_14784	Idh	chr3L:8351005-8353891	Idh	5_Junction_14782_Junction_14783_Junction_14784:002	0.778929	18.1811	0.001	0.028592	24	reads okay	CYCLE	CYCLE	mRNA cycles	5.43973	21	20	7	17	17	14	28	22	14	5	28	16	0.4468	0.5128	0.2258	0.1889	0.1164	0.1037	0.3373	0.5641	0.2857	0.1282	0.1842	0.1127
PDF_5198	5_Junction_14782_Junction_14783_Junction_14784	Idh	chr3L:8351005-8353891	Idh	5_Junction_14782_Junction_14783_Junction_14784:003	0.808507	19.6169	0.0002	0.0118313	24	reads okay	CYCLE	CYCLE	mRNA cycles	3.84445	26	9	20	70	127	117	48	17	30	30	122	126	0.5532	0.2308	0.6452	0.7778	0.8699	0.8667	0.5783	0.4359	0.6122	0.7692	0.8026	0.8873
PDF_5224	5_Junction_15155_Junction_15156	eIF-4E	chr3L:9394053-9395378	eIF-4E	5_Junction_15155_Junction_15156:001	0.577066	13.7473	0.0136	0.108541	22.6667	reads okay	CYCLE	FALSE	#N/A	2.41488	55	74	64	53	159	67	91	22	59	39	46	96	1	0.8605	0.6214	0.4141	0.7227	0.7528	0.7339	0.6471	0.6556	0.65	0.5823	0.8067
PDF_5225	5_Junction_15155_Junction_15156	eIF-4E	chr3L:9394053-9395378	eIF-4E	5_Junction_15155_Junction_15156:002	0.577066	1.78907	0.0136	0.108541	22.6667	reads okay	CYCLE	FALSE	#N/A	5.859	0	12	39	75	61	22	33	12	31	21	33	23	0	0.1395	0.3786	0.5859	0.2773	0.2472	0.2661	0.3529	0.3444	0.35	0.4177	0.1933
PDF_5292	5_Junction_15543_Junction_15544	NK7.1	chr3R:10193218-10195569	NK7.1	5_Junction_15543_Junction_15544:001	0.544359	6.36391	0.038	0.170691	24	FALSE	FALSE	FALSE	#N/A	10	9	3	3	5	9	9	4	3	0	0	11	11	0.36	0.3333	0.5	0.8333	1	1	0.4	0.375	INF	0	1	0.7333
PDF_5293	5_Junction_15543_Junction_15544	NK7.1	chr3R:10193218-10195569	NK7.1	5_Junction_15543_Junction_15544:002	0.273133	17.5769	0.2331	0.383824	24	FALSE	FALSE	FALSE	#N/A	10	16	6	3	1	0	0	6	5	0	4	0	4	0.64	0.6667	0.5	0.1667	0	0	0.6	0.625	INF	1	0	0.2667
PDF_5294	5_Junction_15545_Junction_15546_Junction_15547_Junction_15548	NK7.1	chr3R:10193221-10195569	NK7.1	5_Junction_15545_Junction_15546_Junction_15547_Junction_15548:001	0.545477	11.1653	0.0259	0.0832745	22	reads okay	CYCLE	FALSE	#N/A	10	13	0	9	27	36	24	15	6	5	2	26	24	0.5652	0	0.6429	0.6279	0.6923	0.8889	0.5556	0.24	0.4167	1	0.7879	0.4615
PDF_5295	5_Junction_15545_Junction_15546_Junction_15547_Junction_15548	NK7.1	chr3R:10193221-10195569	NK7.1	5_Junction_15545_Junction_15546_Junction_15547_Junction_15548:002	0.179444	3.92731	0.4437	1	22.1818	FALSE	FALSE	FALSE	#N/A	5.833	0	0	3	6	5	2	0	1	7	0	0	11	0	0	0.2143	0.1395	0.0962	0.0741	0	0.04	0.5833	0	0	0.2115
PDF_5296	5_Junction_15545_Junction_15546_Junction_15547_Junction_15548	NK7.1	chr3R:10193221-10195569	NK7.1	5_Junction_15545_Junction_15546_Junction_15547_Junction_15548:003	0.635179	7.19945	0.0102	0.108541	24	FALSE	FALSE	FALSE	#N/A	7.273	10	8	0	0	3	1	11	10	0	0	3	3	0.4348	0.7273	0	0	0.0577	0.037	0.4074	0.4	0	0	0.0909	0.0577
PDF_5297	5_Junction_15545_Junction_15546_Junction_15547_Junction_15548	NK7.1	chr3R:10193221-10195569	NK7.1	5_Junction_15545_Junction_15546_Junction_15547_Junction_15548:004	0.0291933	16.9532	0.8642	1	22.1818	FALSE	FALSE	FALSE	#N/A	3.2	0	3	2	10	8	0	1	8	0	0	4	14	0	0.2727	0.1429	0.2326	0.1538	0	0.037	0.32	0	0	0.1212	0.2692
PDF_5307	5_Junction_15711_Junction_15712_Junction_15713	mtd	chr3R:1100809-1118360	mtd	5_Junction_15711_Junction_15712_Junction_15713:001	0.525057	7.24086	0.0313	0.066577	24	reads okay	CYCLE	FALSE	#N/A	10	4	0	0	8	15	2	2	2	13	1	26	7	0.1905	0	0	0.2759	0.4545	0.2	0.0667	0.0541	0.52	1	0.619	0.1707
PDF_5308	5_Junction_15711_Junction_15712_Junction_15713	mtd	chr3R:1100809-1118360	mtd	5_Junction_15711_Junction_15712_Junction_15713:002	0.158426	2.04531	0.4591	1	22.1818	reads okay	FALSE	FALSE	#N/A	6.667	13	0	6	11	3	0	7	17	5	0	11	5	0.619	0	0.6667	0.3793	0.0909	0	0.2333	0.4595	0.2	0	0.2619	0.122
PDF_5309	5_Junction_15711_Junction_15712_Junction_15713	mtd	chr3R:1100809-1118360	mtd	5_Junction_15711_Junction_15712_Junction_15713:003	0.35851	6.92653	0.1382	0.133807	20	reads okay	FALSE	FALSE	#N/A	10	4	29	3	10	15	8	21	18	7	0	5	29	0.1905	1	0.3333	0.3448	0.4545	0.8	0.7	0.4865	0.28	0	0.119	0.7073
PDF_5399	5_Junction_16510_Junction_16511	Ssdp	chr3R:14022842-14024927	Ssdp	5_Junction_16510_Junction_16511:001	0.672351	4.89847	0.0058	0.0498795	24	reads okay	CYCLE	CYCLE	#N/A	4.333	0	0	5	11	25	5	15	13	5	13	16	12	0	0	0.1111	0.2558	0.431	0.25	0.1271	0.1733	0.0781	0.4333	0.2353	0.1875
PDF_5400	5_Junction_16510_Junction_16511	Ssdp	chr3R:14022842-14024927	Ssdp	5_Junction_16510_Junction_16511:002	0.672351	20.4391	0.006	0.0498795	24	reads okay	CYCLE	CYCLE	#N/A	1.7646	40	5	40	32	33	15	103	62	59	17	52	52	1	1	0.8889	0.7442	0.569	0.75	0.8729	0.8267	0.9219	0.5667	0.7647	0.8125
PDF_5767	5_Junction_17315_Junction_17316	Nlg4	chr3R:16030700-16031918	Nlg4	5_Junction_17315_Junction_17316:001	0.297233	16.8176	0.1668	1	22.1818	FALSE	FALSE	FALSE	#N/A	10	5	0	1	3	1	0	2	2	9	0	0	2	1	INF	0.2	0.1429	0.0769	0	0.4	0.2857	0.4091	0	0	0.125
PDF_5768	5_Junction_17315_Junction_17316	Nlg4	chr3R:16030700-16031918	Nlg4	5_Junction_17315_Junction_17316:002	0.575203	22.9709	0.0103	0.0498795	24	reads okay	CYCLE	CYCLE	#N/A	10	0	0	4	18	12	1	3	5	13	7	15	14	0	INF	0.8	0.8571	0.9231	1	0.6	0.7143	0.5909	1	1	0.875
PDF_5809	5_Junction_17797_Junction_17798	CASK	chr3R:17613824-17615169	CASK	5_Junction_17797_Junction_17798:001	0.537421	1.97006	0.0368	0.066577	24	FALSE	FALSE	FALSE	#N/A	5.238	0	7	44	24	32	5	0	0	0	4	6	3	0	0.0603	0.5238	0.4	0.3137	0.0962	0	0	0	0.3636	0.0923	0.0698
PDF_5810	5_Junction_17797_Junction_17798	CASK	chr3R:17613824-17615169	CASK	5_Junction_17797_Junction_17798:002	0.537421	17.6528	0.0368	0.066577	24	reads okay	CYCLE	FALSE	#N/A	2.09996	45	109	40	36	70	47	44	26	26	7	59	40	1	0.9397	0.4762	0.6	0.6863	0.9038	1	1	1	0.6364	0.9077	0.9302
PDF_5836	5_Junction_17955_Junction_17956	Nrx-1	chr3R:18306848-18308567	Nrx-1	5_Junction_17955_Junction_17956:001	0.543027	1.33064	0.0148	0.108541	22	FALSE	FALSE	FALSE	mRNA cycles	6.923	0	6	16	5	22	1	3	4	3	9	2	3	0	0.0984	0.4324	0.2778	0.3492	0.0909	0.1667	0.1429	0.2143	0.6923	0.1	0.1071
PDF_5837	5_Junction_17955_Junction_17956	Nrx-1	chr3R:18306848-18308567	Nrx-1	5_Junction_17955_Junction_17956:002	0.543027	18.1121	0.0148	0.108541	22	reads okay	CYCLE	FALSE	mRNA cycles	3.24992	34	55	21	13	41	10	15	24	11	4	18	25	1	0.9016	0.5676	0.7222	0.6508	0.9091	0.8333	0.8571	0.7857	0.3077	0.9	0.8929
PDF_5849	5_Junction_18040_Junction_18041	CG7029	chr3R:18614490-18615246	CG7029	5_Junction_18040_Junction_18041:001	0.527836	9.96951	0.0356	0.207575	20	reads okay	CYCLE	FALSE	#N/A	10	12	4	0	2	6	1	4	3	0	0	1	15	1	0.5	0	0.5	0.5455	0.3333	0.5	0.375	0	INF	0.3333	0.75
PDF_5850	5_Junction_18040_Junction_18041	CG7029	chr3R:18614490-18615246	CG7029	5_Junction_18040_Junction_18041:002	0.17253	#N/A	0.4287	1	22.1818	FALSE	FALSE	FALSE	#N/A	10	0	4	5	2	5	2	4	5	1	0	2	5	0	0.5	1	0.5	0.4545	0.6667	0.5	0.625	1	INF	0.6667	0.25
PDF_6158	5_Junction_20514_Junction_20515	heph	chr3R:27691047-27691483	heph	5_Junction_20514_Junction_20515:001	0.254418	14.574	0.2649	1	22.1818	FALSE	FALSE	FALSE	#N/A	10	0	19	8	13	8	13	9	6	2	0	5	10	INF	0.6786	0.3636	0.4333	0.4444	0.6842	1	1	0.1333	0	0.2632	0.3846
PDF_6159	5_Junction_20514_Junction_20515	heph	chr3R:27691047-27691483	heph	5_Junction_20514_Junction_20515:002	0.726194	18.9844	0.0049	0.0392357	24	reads okay	CYCLE	CYCLE	#N/A	10	0	9	14	17	10	6	0	0	13	7	14	16	INF	0.3214	0.6364	0.5667	0.5556	0.3158	0	0	0.8667	1	0.7368	0.6154
PDF_6323	5_Junction_21791_Junction_21792_Junction_21793	Jupiter	chr3R:7417029-7418087	Jupiter	5_Junction_21791_Junction_21792_Junction_21793:001	0.130841	13.6177	0.5741	1	22.1818	FALSE	FALSE	FALSE	#N/A	0.248	0	18	0	0	2	1	0	1	3	2	7	0	0	0.0231	0	0	0.006	0.0068	0	0.0097	0.0248	0.0238	0.0243	0
PDF_6324	5_Junction_21791_Junction_21792_Junction_21793	Jupiter	chr3R:7417029-7418087	Jupiter	5_Junction_21791_Junction_21792_Junction_21793:002	0.455225	1.63856	0.0589	0.133807	24	reads okay	FALSE	FALSE	#N/A	2.05201	356	485	267	262	246	102	115	73	93	65	197	142	0.4518	0.6218	0.9271	0.8562	0.7432	0.6986	0.6183	0.7087	0.7686	0.7738	0.684	0.8304
PDF_6325	5_Junction_21791_Junction_21792_Junction_21793	Jupiter	chr3R:7417029-7418087	Jupiter	5_Junction_21791_Junction_21792_Junction_21793:003	0.511827	10.3472	0.0331	0.066577	24	reads okay	CYCLE	FALSE	#N/A	7.51989	432	277	21	44	83	43	71	29	25	17	84	29	0.5482	0.3551	0.0729	0.1438	0.2508	0.2945	0.3817	0.2816	0.2066	0.2024	0.2917	0.1696
PDF_6328	5_Junction_21798_Junction_21799	Jupiter	chr3R:7419488-7445424	Jupiter	5_Junction_21798_Junction_21799:001	0.544346	17.4692	0.0421	0.108541	24	reads okay	CYCLE	FALSE	#N/A	1.5625	88	54	71	88	80	48	97	83	58	18	149	77	0.9565	1	0.7717	0.6667	0.64	0.6957	0.9238	0.9222	0.9667	0.72	0.903	0.6754
PDF_6329	5_Junction_21798_Junction_21799	Jupiter	chr3R:7419488-7445424	Jupiter	5_Junction_21798_Junction_21799:002	0.544346	6	0.0421	0.108541	24	reads okay	CYCLE	FALSE	#N/A	3.6	4	0	21	44	45	21	8	7	2	7	16	37	0.0435	0	0.2283	0.3333	0.36	0.3043	0.0762	0.0778	0.0333	0.28	0.097	0.3246
PDF_6378	5_Junction_22362_Junction_22363_Junction_22364	rdx	chr3R:9796824-9852598	rdx	5_Junction_22362_Junction_22363_Junction_22364:001	0.4994	13.7248	0.0484	0.0392357	20	reads okay	FALSE	CYCLE	mRNA cycles	7.778	0	21	17	8	10	1	2	3	36	5	11	0	INF	0.7778	0.5667	0.2162	0.3846	0.1	0.0909	0.1875	0.4557	0.4167	0.2821	0
PDF_6379	5_Junction_22362_Junction_22363_Junction_22364	rdx	chr3R:9796824-9852598	rdx	5_Junction_22362_Junction_22363_Junction_22364:002	0.128456	21.161	0.5343	1	22.1818	reads okay	FALSE	FALSE	mRNA cycles	5.405	0	6	6	20	5	0	1	5	13	1	9	9	INF	0.2222	0.2	0.5405	0.1923	0	0.0455	0.3125	0.1646	0.0833	0.2308	0.4286
PDF_6380	5_Junction_22362_Junction_22363_Junction_22364	rdx	chr3R:9796824-9852598	rdx	5_Junction_22362_Junction_22363_Junction_22364:003	0.249692	18.0432	0.2804	0.898239	24	reads okay	FALSE	FALSE	mRNA cycles	9	0	0	7	9	11	9	19	8	30	6	19	12	INF	0	0.2333	0.2432	0.4231	0.9	0.8636	0.5	0.3797	0.5	0.4872	0.5714
PDF_6424	5_Junction_22603_Junction_22604	Caps	chr4:1254609-1259566	Caps	5_Junction_22603_Junction_22604:001	0.606648	17.5239	0.0157	0.0392357	24	reads okay	CYCLE	CYCLE	#N/A	3.889	0	0	21	11	8	1	0	9	12	6	11	12	INF	INF	0.3889	0.2115	0.2286	0.0556	0	0.1915	0.2449	0.2609	0.234	0.2069
PDF_6425	5_Junction_22603_Junction_22604	Caps	chr4:1254609-1259566	Caps	5_Junction_22603_Junction_22604:002	0.200736	12.7262	0.4232	1	22.1818	reads okay	FALSE	FALSE	#N/A	1.63639	0	0	33	41	27	17	38	38	37	17	36	46	INF	INF	0.6111	0.7885	0.7714	0.9444	1	0.8085	0.7551	0.7391	0.766	0.7931
PDF_6459	5_Junction_22719_Junction_22720	Arl4	chr4:199837-199888	Arl4	5_Junction_22719_Junction_22720:001	0.523498	4.3778	0.0201	0.066577	24	FALSE	FALSE	FALSE	#N/A	6.364	0	0	3	5	10	6	0	0	7	7	11	6	0	0	0.0857	0.0877	0.2941	0.3	0	0	0.1111	0.6364	0.2558	0.1
PDF_6460	5_Junction_22719_Junction_22720	Arl4	chr4:199837-199888	Arl4	5_Junction_22719_Junction_22720:002	0.523498	19.2946	0.0201	0.066577	24	reads okay	CYCLE	FALSE	#N/A	2.75028	8	4	32	52	24	14	40	14	56	4	32	54	1	1	0.9143	0.9123	0.7059	0.7	1	1	0.8889	0.3636	0.7442	0.9
PDF_6724	5_Junction_23546_Junction_23547	CG1552	chrX:10946890-10947104	CG1552	5_Junction_23546_Junction_23547:001	0.544929	12.1963	0.0348	0.455603	24	reads okay	CYCLE	FALSE	#N/A	10	0	0	13	4	10	3	0	0	0	0	9	49	INF	0	0.3095	0.5	0.4545	1	INF	INF	INF	INF	0.5	0.8167
PDF_6725	5_Junction_23546_Junction_23547	CG1552	chrX:10946890-10947104	CG1552	5_Junction_23546_Junction_23547:002	0.0956746	7.94708	0.6196	1	22.1818	reads okay	FALSE	FALSE	#N/A	10	0	4	29	4	12	0	0	0	0	0	9	11	INF	1	0.6905	0.5	0.5455	0	INF	INF	INF	INF	0.5	0.1833
PDF_7467	5_Junction_25930_Junction_25931	CG8289	chrX:17528386-17528605	CG8289	5_Junction_25930_Junction_25931:002	0.445819	10.8255	0.0196	0.00388889	20	reads okay	FALSE	CYCLE	#N/A	1.68407	3	19	16	19	19	10	16	16	23	0	21	1	1	0.5938	0.6667	0.7917	0.9048	0.9091	1	0.8	0.7188	INF	0.84	1
PDF_7681	5_Junction_26898_Junction_26899_Junction_26900	bves	chrX:20947209-20951805	bves	5_Junction_26898_Junction_26899_Junction_26900:001	0.224114	13.6383	0.3063	0.551671	20	FALSE	FALSE	FALSE	#N/A	3.75	0	6	6	3	3	3	0	15	3	0	1	0	0	0.3529	0.1765	0.12	0.1071	0.3	0	0.375	0.1579	0	0.0625	0
PDF_7682	5_Junction_26898_Junction_26899_Junction_26900	bves	chrX:20947209-20951805	bves	5_Junction_26898_Junction_26899_Junction_26900:002	0.621711	0.582185	0.0191	0.00804821	24	reads okay	CYCLE	CYCLE	#N/A	9.375	0	8	17	17	5	1	1	6	11	5	15	4	0	0.4706	0.5	0.68	0.1786	0.1	0.0833	0.15	0.5789	0.7143	0.9375	0.2667
PDF_7683	5_Junction_26898_Junction_26899_Junction_26900	bves	chrX:20947209-20951805	bves	5_Junction_26898_Junction_26899_Junction_26900:003	0.551639	14.3413	0.0349	0.133807	24	reads okay	CYCLE	FALSE	#N/A	10	19	3	11	5	20	6	11	19	5	2	0	11	1	0.1765	0.3235	0.2	0.7143	0.6	0.9167	0.475	0.2632	0.2857	0	0.7333
PDF_8244	5_Junction_29209_Junction_29210	CG43867	chrX:716002-737143	CG43867	5_Junction_29209_Junction_29210:001	0.524408	15.6965	0.039	0.25981	22	reads okay	CYCLE	FALSE	#N/A	10	54	10	0	2	3	3	8	31	3	0	2	3	0.7013	1	0	0.5	0.6	0.5	0.8889	1	0.4286	INF	0.3333	0.5
PDF_8245	5_Junction_29209_Junction_29210	CG43867	chrX:716002-737143	CG43867	5_Junction_29209_Junction_29210:002	0.159581	7.32845	0.4623	1	22.1818	FALSE	FALSE	FALSE	#N/A	10	23	0	4	2	2	3	1	0	4	0	4	3	0.2987	0	1	0.5	0.4	0.5	0.1111	0	0.5714	INF	0.6667	0.5
PDF_8271	5_Junction_29586_Junction_29587	lawc	chrX:8302811-8303694	lawc	5_Junction_29586_Junction_29587:001	0.52404	2.83614	0.0436	0.207575	22	reads okay	CYCLE	FALSE	#N/A	5.333	0	0	9	27	19	8	14	0	32	2	8	9	0	0	0.2727	0.4286	0.4043	0.3077	0.2917	0	0.5333	0.5	0.186	0.18
PDF_8272	5_Junction_29586_Junction_29587	lawc	chrX:8302811-8303694	lawc	5_Junction_29586_Junction_29587:002	0.52404	6.84363	0.0435	0.207575	22	reads okay	CYCLE	FALSE	#N/A	2.1427	12	2	24	36	28	18	34	20	28	2	35	41	1	1	0.7273	0.5714	0.5957	0.6923	0.7083	1	0.4667	0.5	0.814	0.82
PDF_8481	5_Junction_369_Junction_370	RluA-2	chr2L:10482574-10482635	RluA-2	5_Junction_369_Junction_370:001	0.619387	4.51909	0.015	0.133807	24	reads okay	CYCLE	FALSE	#N/A	8	0	0	20	13	12	5	1	0	6	4	5	17	INF	0	0.5714	0.4483	0.3429	0.2778	0.1429	0	0.3529	0.8	0.3125	0.4595
PDF_8482	5_Junction_369_Junction_370	RluA-2	chr2L:10482574-10482635	RluA-2	5_Junction_369_Junction_370:002	0.0757961	8	0.6962	0.898239	20	reads okay	FALSE	FALSE	#N/A	5	0	6	15	16	23	13	6	16	11	1	11	20	INF	1	0.4286	0.5517	0.6571	0.7222	0.8571	1	0.6471	0.2	0.6875	0.5405
PDF_8515	5_Junction_3986_Junction_3987	Ziz	chr2L:7483627-7495511	Ziz	5_Junction_3986_Junction_3987:001	0.586777	4.10176	0.0301	0.25981	20	reads okay	CYCLE	FALSE	#N/A	16	16	1	0	4	5	2	4	4	0	1	14	4	1	0.0625	INF	1	0.8333	0.5	0.5714	0.25	INF	1	1	1
PDF_8516	5_Junction_3986_Junction_3987	Ziz	chr2L:7483627-7495511	Ziz	5_Junction_3986_Junction_3987:002	0.377133	17.0263	0.1312	0.383824	20	reads okay	FALSE	FALSE	#N/A	9.375	0	15	0	0	1	2	3	12	0	0	0	0	0	0.9375	INF	0	0.1667	0.5	0.4286	0.75	INF	0	0	0
PDF_8531	5_Junction_4180_Junction_4181	CG3662	chr2L:824137-824217	CG3662	5_Junction_4180_Junction_4181:001	0.526544	15.4241	0.0278	0.551671	24	reads okay	CYCLE	FALSE	#N/A	3.04971	20	33	54	39	52	24	62	106	40	16	63	63	1	0.75	0.4463	0.4105	0.3768	0.4528	0.6078	0.7626	0.3279	0.4571	0.5431	0.4286
PDF_8532	5_Junction_4180_Junction_4181	CG3662	chr2L:824137-824217	CG3662	5_Junction_4180_Junction_4181:002	0.526544	0.387835	0.0279	0.551671	24	reads okay	CYCLE	FALSE	#N/A	6.721	0	11	67	56	86	29	40	33	82	19	53	84	0	0.25	0.5537	0.5895	0.6232	0.5472	0.3922	0.2374	0.6721	0.5429	0.4569	0.5714
PDF_8549	5_Junction_4455_Junction_4456	Nckx30C	chr2L:9714153-9743476	Nckx30C	5_Junction_4455_Junction_4456:001	0.434453	23.3006	0.0696	0.0156143	24	reads okay	FALSE	CYCLE	#N/A	3.0003	4	28	22	26	19	8	11	20	15	12	20	21	0.3333	1	0.7333	0.7027	0.5758	0.5333	0.44	0.5714	0.6522	0.75	0.6667	0.4667
PDF_8550	5_Junction_4455_Junction_4456	Nckx30C	chr2L:9714153-9743476	Nckx30C	5_Junction_4455_Junction_4456:002	0.434453	2	0.0696	0.0156143	24	reads okay	FALSE	CYCLE	#N/A	6.667	8	0	8	11	14	7	14	15	8	4	10	24	0.6667	0	0.2667	0.2973	0.4242	0.4667	0.56	0.4286	0.3478	0.25	0.3333	0.5333
PDF_8564	5_Junction_4511_Junction_4512	nAChRalpha6	chr2L:9878025-9885930	nAChRalpha6	5_Junction_4511_Junction_4512:001	0.118558	16.1203	0.5713	1	22.1818	reads okay	FALSE	FALSE	#N/A	4.50045	19	0	8	22	6	9	11	9	21	4	31	17	1	INF	0.4444	0.5641	0.2222	0.4286	0.7333	0.6923	0.5	0.3333	0.6596	0.4474
PDF_8565	5_Junction_4511_Junction_4512	nAChRalpha6	chr2L:9878025-9885930	nAChRalpha6	5_Junction_4511_Junction_4512:002	0.522877	6	0.0381	0.25981	24	reads okay	CYCLE	FALSE	#N/A	7.778	0	0	10	17	21	12	4	4	21	8	16	21	0	INF	0.5556	0.4359	0.7778	0.5714	0.2667	0.3077	0.5	0.6667	0.3404	0.5526
PDF_8601	5_Junction_490_Junction_491_Junction_492	CG16833	chr2L:10994021-10997333	CG16833	5_Junction_490_Junction_491_Junction_492:001	0.198884	14.2948	0.3655	1	22.1818	FALSE	FALSE	FALSE	#N/A	6	0	0	12	15	10	1	5	0	2	0	2	2	0	0	0.4138	0.6	0.4	0.0909	0.25	0	0.0952	0	0.087	0.2857
PDF_8602	5_Junction_490_Junction_491_Junction_492	CG16833	chr2L:10994021-10997333	CG16833	5_Junction_490_Junction_491_Junction_492:002	0.273719	2.82106	0.2394	1	22.1818	reads okay	FALSE	FALSE	#N/A	8.571	0	0	12	4	11	6	0	6	10	12	4	2	0	0	0.4138	0.16	0.44	0.5455	0	0.4615	0.4762	0.8571	0.1739	0.2857
PDF_8603	5_Junction_490_Junction_491_Junction_492	CG16833	chr2L:10994021-10997333	CG16833	5_Junction_490_Junction_491_Junction_492:003	0.518661	16.6644	0.0474	0.0498795	24	reads okay	CYCLE	CYCLE	#N/A	6.9979	3	15	5	6	4	4	15	7	9	2	17	3	1	1	0.1724	0.24	0.16	0.3636	0.75	0.5385	0.4286	0.1429	0.7391	0.4286
PDF_8610	5_Junction_4993_Junction_4994	CG43729	chr2R:11340513-11343938	CG43729	5_Junction_4993_Junction_4994:001	0.604504	2.57452	0.0068	0.0498795	24	reads okay	CYCLE	CYCLE	#N/A	10	0	13	4	18	7	2	15	25	10	2	7	11	0	0.3714	0.4444	0.7826	0.5833	0.25	0.4054	0.2809	0.4762	1	0.4375	0.5789
PDF_8611	5_Junction_4993_Junction_4994	CG43729	chr2R:11340513-11343938	CG43729	5_Junction_4993_Junction_4994:002	0.604504	18.3712	0.0068	0.0498795	24	reads okay	CYCLE	CYCLE	#N/A	10	32	22	5	5	5	6	22	64	11	0	9	8	1	0.6286	0.5556	0.2174	0.4167	0.75	0.5946	0.7191	0.5238	0	0.5625	0.4211
PDF_8642	5_Junction_5430_Junction_5431_Junction_5432	unc-104	chr2R:12650845-12659761	unc-104	5_Junction_5430_Junction_5431_Junction_5432:001	0.537102	16.6772	0.032	0.312046	24	reads okay	CYCLE	FALSE	#N/A	3.24386	46	12	9	15	26	15	46	109	17	18	25	52	0.8846	0.6667	0.5294	0.2727	0.5417	0.5172	0.5897	0.8195	0.3091	0.5625	0.463	0.6842
PDF_8642	5_Junction_5430_Junction_5431_Junction_5432	unc-104	chr2R:12650845-12659761	unc-104	5_Junction_5430_Junction_5431_Junction_5432:001	0.537102	16.6772	0.032	0.312046	24	reads okay	CYCLE	FALSE	#N/A	3.24386	46	12	9	15	26	15	46	109	17	18	25	52	0.8846	0.6667	0.5294	0.2727	0.5417	0.5172	0.5897	0.8195	0.3091	0.5625	0.463	0.6842
PDF_8643	5_Junction_5430_Junction_5431_Junction_5432	unc-104	chr2R:12650845-12659761	unc-104	5_Junction_5430_Junction_5431_Junction_5432:002	0.43662	12.7616	0.0675	0.25981	24	FALSE	FALSE	FALSE	#N/A	3.091	0	0	0	17	6	4	9	3	4	3	10	1	0	0	0	0.3091	0.125	0.1379	0.1154	0.0226	0.0727	0.0938	0.1852	0.0132
PDF_8643	5_Junction_5430_Junction_5431_Junction_5432	unc-104	chr2R:12650845-12659761	unc-104	5_Junction_5430_Junction_5431_Junction_5432:002	0.43662	12.7616	0.0675	0.25981	24	FALSE	FALSE	FALSE	#N/A	3.091	0	0	0	17	6	4	9	3	4	3	10	1	0	0	0	0.3091	0.125	0.1379	0.1154	0.0226	0.0727	0.0938	0.1852	0.0132
PDF_8644	5_Junction_5430_Junction_5431_Junction_5432	unc-104	chr2R:12650845-12659761	unc-104	5_Junction_5430_Junction_5431_Junction_5432:003	0.445534	16.7905	0.0612	0.0498795	20	reads okay	FALSE	CYCLE	#N/A	5.35702	6	6	8	23	16	10	23	21	34	11	19	23	0.1154	0.3333	0.4706	0.4182	0.3333	0.3448	0.2949	0.1579	0.6182	0.3438	0.3519	0.3026
PDF_8644	5_Junction_5430_Junction_5431_Junction_5432	unc-104	chr2R:12650845-12659761	unc-104	5_Junction_5430_Junction_5431_Junction_5432:003	0.445534	16.7905	0.0612	0.0498795	20	reads okay	FALSE	CYCLE	#N/A	5.35702	6	6	8	23	16	10	23	21	34	11	19	23	0.1154	0.3333	0.4706	0.4182	0.3333	0.3448	0.2949	0.1579	0.6182	0.3438	0.3519	0.3026
PDF_8651	5_Junction_5450_Junction_5451	CG5522	chr2R:12677420-12678242	CG5522	5_Junction_5450_Junction_5451:001	0.611627	0.719895	0.0097	0.0498795	24	reads okay	CYCLE	CYCLE	#N/A	10	0	14	11	38	27	11	0	15	5	7	21	9	0	0.5833	0.5789	0.6333	0.4286	0.5	0	0.6522	1	1	0.6562	0.4737
PDF_8652	5_Junction_5450_Junction_5451	CG5522	chr2R:12677420-12678242	CG5522	5_Junction_5450_Junction_5451:002	0.611627	2	0.0097	0.0498795	24	reads okay	CYCLE	CYCLE	#N/A	10	12	10	8	22	36	11	17	8	0	0	11	10	1	0.4167	0.4211	0.3667	0.5714	0.5	1	0.3478	0	0	0.3438	0.5263
PDF_8745	5_Junction_6333_Junction_6334	CG8920	chr2R:16211916-16212351	CG8920	5_Junction_6333_Junction_6334:001	0.63907	1.72481	0.011	0.028592	24	reads okay	CYCLE	CYCLE	#N/A	8	0	3	6	11	12	7	7	0	1	5	18	7	INF	0.3	0.6667	0.5789	0.5455	0.4375	0.2692	INF	0.125	1	0.6667	0.4118
PDF_8746	5_Junction_6333_Junction_6334	CG8920	chr2R:16211916-16212351	CG8920	5_Junction_6333_Junction_6334:002	0.00983999	15.2498	0.9565	1	22.1818	FALSE	FALSE	FALSE	#N/A	8.75	0	7	3	8	10	9	19	0	7	0	9	10	INF	0.7	0.3333	0.4211	0.4545	0.5625	0.7308	INF	0.875	0	0.3333	0.5882
PDF_8787	5_Junction_6634_Junction_6635	Sdc	chr2R:17299923-17367594	Sdc	5_Junction_6634_Junction_6635:001	0.510081	5.38275	0.0361	0.207575	24	reads okay	CYCLE	FALSE	#N/A	4.9672	28	8	28	49	76	30	19	19	15	17	95	57	0.2523	0.125	0.3733	0.4083	0.5278	0.5172	0.4043	0.4318	0.5556	0.5667	0.6209	0.5758
PDF_8788	5_Junction_6634_Junction_6635	Sdc	chr2R:17299923-17367594	Sdc	5_Junction_6634_Junction_6635:002	0.508153	9.16534	0.0356	0.207575	24	reads okay	CYCLE	FALSE	#N/A	2.3081	83	56	47	71	68	28	28	25	12	13	58	42	0.7477	0.875	0.6267	0.5917	0.4722	0.4828	0.5957	0.5682	0.4444	0.4333	0.3791	0.4242
PDF_8827	5_Junction_6968_Junction_6969	Src42A	chr2R:1898273-1898444	Src42A	5_Junction_6968_Junction_6969:001	0.029377	15.4325	0.9358	0.898239	20	reads okay	FALSE	FALSE	#N/A	1.89466	0	2	28	44	19	15	51	46	30	12	52	50	INF	1	0.6667	0.7586	0.5278	0.75	0.8095	0.9787	0.7143	0.5714	0.8525	0.8333
PDF_8828	5_Junction_6968_Junction_6969	Src42A	chr2R:1898273-1898444	Src42A	5_Junction_6968_Junction_6969:002	0.553808	12.5835	0.0317	0.25981	24	reads okay	CYCLE	FALSE	#N/A	4.722	0	0	14	14	17	5	12	1	12	9	9	10	INF	0	0.3333	0.2414	0.4722	0.25	0.1905	0.0213	0.2857	0.4286	0.1475	0.1667
PDF_8833	5_Junction_7015_Junction_7016	CG3530	chr2R:19281003-19283950	CG3530	5_Junction_7015_Junction_7016:001	0.582779	15.1141	0.0248	0.028592	20	reads okay	CYCLE	CYCLE	#N/A	5.33333	25	9	17	3	21	9	25	23	12	2	18	14	0.8929	1	0.6296	0.1875	0.5833	0.5	0.641	1	0.3871	0.4	0.6	0.8235
PDF_8834	5_Junction_7015_Junction_7016	CG3530	chr2R:19281003-19283950	CG3530	5_Junction_7015_Junction_7016:002	0.582779	17.884	0.0248	0.028592	20	reads okay	CYCLE	CYCLE	#N/A	8.125	3	0	10	13	15	9	14	0	19	3	12	3	0.1071	0	0.3704	0.8125	0.4167	0.5	0.359	0	0.6129	0.6	0.4	0.1765
PDF_9140	5_Junction_7876_Junction_7877	Dscam1	chr2R:3210837-3212085	Dscam1	5_Junction_7876_Junction_7877:001	0.528715	11.9393	0.0404	0.066577	20	reads okay	CYCLE	FALSE	#N/A	10	24	18	0	1	11	9	5	2	2	3	15	5	1	0.6207	0	0.25	0.5789	0.8182	0.7143	1	0.2222	0.5	0.9375	0.625
PDF_9141	5_Junction_7876_Junction_7877	Dscam1	chr2R:3210837-3212085	Dscam1	5_Junction_7876_Junction_7877:002	0.524032	19.022	0.0422	0.0832745	20	FALSE	FALSE	FALSE	#N/A	10	0	11	1	3	8	2	2	0	7	3	1	3	0	0.3793	1	0.75	0.4211	0.1818	0.2857	0	0.7778	0.5	0.0625	0.375
PDF_9202	5_Junction_8662_Junction_8663	hig	chr2R:5118153-5119251	hig	5_Junction_8662_Junction_8663:001	0.0923704	15.7649	0.6688	1	22.1818	FALSE	FALSE	FALSE	#N/A	6.25	0	3	6	3	5	1	5	0	0	0	1	9	INF	0.2727	0.375	0.1875	0.1	0.0455	0.625	INF	0	0	0.0667	0.2903
PDF_9203	5_Junction_8662_Junction_8663	hig	chr2R:5118153-5119251	hig	5_Junction_8662_Junction_8663:002	0.563614	16.2264	0.0211	0.312046	24	reads okay	CYCLE	FALSE	#N/A	2.66667	0	8	10	13	45	21	3	0	2	8	14	22	INF	0.7273	0.625	0.8125	0.9	0.9545	0.375	INF	1	1	0.9333	0.7097
PDF_9318	5_Junction_9880_Junction_9881	bbc	chr2R:9375637-9378243	bbc	5_Junction_9880_Junction_9881:001	0.312589	16.1639	0.1895	0.207575	20	reads okay	FALSE	FALSE	#N/A	5	0	12	11	7	13	5	13	15	2	1	3	6	INF	0.8	0.7333	0.2917	0.4333	0.625	0.8667	1	0.5	0.2	0.3333	0.3529
PDF_9319	5_Junction_9880_Junction_9881	bbc	chr2R:9375637-9378243	bbc	5_Junction_9880_Junction_9881:002	0.833346	5.06058	0.0012	0.00281011	24	reads okay	CYCLE	CYCLE	#N/A	8	0	3	4	17	17	3	2	0	2	4	6	11	INF	0.2	0.2667	0.7083	0.5667	0.375	0.1333	0	0.5	0.8	0.6667	0.6471
PDF_9326	5_Junction_9989_Junction_9990	shot	chr2R:9753000-9753322	shot	5_Junction_9989_Junction_9990:001	0.561862	10.559	0.0321	0.133807	24	reads okay	CYCLE	FALSE	#N/A	6.27138	43	19	5	8	28	15	31	2	15	9	10	11	0.3805	0.1056	0.0877	0.2105	0.3457	0.3947	0.5439	0.1333	0.2941	0.25	0.1887	0.55
PDF_9327	5_Junction_9989_Junction_9990	shot	chr2R:9753000-9753322	shot	5_Junction_9989_Junction_9990:002	0.561862	14.6551	0.0321	0.133807	24	reads okay	CYCLE	FALSE	#N/A	2.02733	70	161	52	30	53	23	26	13	36	27	43	9	0.6195	0.8944	0.9123	0.7895	0.6543	0.6053	0.4561	0.8667	0.7059	0.75	0.8113	0.45
PDF_9604	intronretentionleft-Junction_26613	Rcd-1	chrX:19533062-19533176	Rcd-1	intronretentionleft-Junction_26613:001	0.396576	15.503	0.1113	0.0118313	20	reads okay	FALSE	CYCLE	#N/A	12.7339	29	27	16	4	40	17	12	15	8	2	6	30	0.2086	0.4355	0.1455	0.0342	0.2878	0.165	0.1739	0.3846	0.1026	0.0588	0.0652	0.2632
PDF_9605	intronretentionleft-Junction_26613	Rcd-1	chrX:19533062-19533176	Rcd-1	intronretentionleft-Junction_26613:002	0.39367	16.8047	0.1134	0.0156143	20	reads okay	FALSE	CYCLE	#N/A	1.71089	110	35	94	113	99	86	57	24	70	32	86	84	0.7914	0.5645	0.8545	0.9658	0.7122	0.835	0.8261	0.6154	0.8974	0.9412	0.9348	0.7368
PDF_9748	intronretentionright-Junction_11343	fwe	chr3L:15803948-15804211	fwe	intronretentionright-Junction_11343:001	0.693926	4.93327	0.0039	0.028592	22	reads okay	CYCLE	CYCLE	#N/A	4.12541	20	6	11	46	44	25	20	8	67	17	65	21	0.3175	0.1538	0.2973	0.3459	0.4889	0.3623	0.2985	0.1212	0.3545	0.5	0.4276	0.2727
PDF_9749	intronretentionright-Junction_11343	fwe	chr3L:15803948-15804211	fwe	intronretentionright-Junction_11343:002	0.693926	11.2738	0.0039	0.028592	22	reads okay	CYCLE	CYCLE	#N/A	1.7576	43	33	26	87	46	44	47	58	122	17	87	56	0.6825	0.8462	0.7027	0.6541	0.5111	0.6377	0.7015	0.8788	0.6455	0.5	0.5724	0.7273
PDF_9766	intronretentionright-Junction_13046	CG33170	chr3L:22859060-22860547	CG33170	intronretentionright-Junction_13046:001	0.480258	11.068	0.0492	0.00804821	20	reads okay	FALSE	CYCLE	#N/A	11.7432	10	9	8	8	22	12	29	3	7	11	12	18	0.5556	0.2812	0.1569	0.2424	0.3667	0.3636	0.6905	0.0588	0.1707	0.3548	0.3243	0.4
PDF_9767	intronretentionright-Junction_13046	CG33170	chr3L:22859060-22860547	CG33170	intronretentionright-Junction_13046:002	0.480258	6	0.0492	0.00804821	20	reads okay	FALSE	CYCLE	#N/A	3.04103	8	23	43	25	38	21	13	48	34	20	25	27	0.4444	0.7188	0.8431	0.7576	0.6333	0.6364	0.3095	0.9412	0.8293	0.6452	0.6757	0.6
PDF_9824	intronretentionright-Junction_17566	Atpalpha	chr3R:16792335-16792877	Atpalpha	intronretentionright-Junction_17566:001	0.495787	14.7165	0.0401	0.0832745	24	reads okay	FALSE	FALSE	#N/A	2.31238	59	86	54	39	109	37	107	73	28	23	82	85	0.7284	0.835	0.5567	0.3611	0.5477	0.4933	0.6369	0.5489	0.4058	0.4894	0.5359	0.6115
PDF_9825	intronretentionright-Junction_17566	Atpalpha	chr3R:16792335-16792877	Atpalpha	intronretentionright-Junction_17566:002	0.501544	16.1469	0.0393	0.0832745	24	reads okay	CYCLE	FALSE	#N/A	3.87212	22	17	43	69	90	38	61	60	41	24	71	54	0.2716	0.165	0.4433	0.6389	0.4523	0.5067	0.3631	0.4511	0.5942	0.5106	0.4641	0.3885
PDF_10028	intronretentionright-Junction_28520	l(1)G0334	chrX:4596624-4596904	l(1)G0334	intronretentionright-Junction_28520:001	0.599508	5.96607	0.0158	0.0498795	22	reads okay	CYCLE	CYCLE	#N/A	2.55089	10	13	65	105	126	44	58	23	17	32	96	48	0.5263	0.3095	0.6436	0.7895	0.6848	0.6027	0.6591	0.4423	0.3469	0.7111	0.7385	0.6857
PDF_10029	intronretentionright-Junction_28520	l(1)G0334	chrX:4596624-4596904	l(1)G0334	intronretentionright-Junction_28520:002	0.599508	2.32459	0.0158	0.0498795	22	reads okay	CYCLE	CYCLE	#N/A	3.28029	9	29	36	28	58	29	30	29	32	13	34	22	0.4737	0.6905	0.3564	0.2105	0.3152	0.3973	0.3409	0.5577	0.6531	0.2889	0.2615	0.3143

## Sheet: TH
cycling ID	junction ID	gene	locataion of longest junction	junction ID	F24 score	phase	p-value F24	JTK p-valuse	JTK phase	>10 reads	F24 10 cycle	JTK 10 cycle	mrNA cycles	amplitude (if min is 0 amplitude is Max *10)	reads 2	reads 6	reads 10	reads 14	reads 18	reads 22	reads 26	reads 30	reads 34	reads 38	reads 42	reads 46	2 percentage usage	6 percentage usage	10 percentage usage	14 percentage usage	18 percentage usage	22 percentage usage	2 percentage usage	6 percentage usage	10 percentage usage	14 percentage usage	18 percentage usage	22 percentage usage
TH_1736	3_Junction_2687_Junction_2689_Junction_2733	galectin	chr2L:72977-74901	3_Junction_2687_Junction_2689_Junction_2733:001	0.39831	8.75919	0.1086	0.0221032	20	reads okay	FALSE	CYCLE	#N/A	10	0	38	10	4	2	31	12	10	23	7	20	14	0	0.76	1	0.5714	0.0952	0.5439	0.5455	0.625	0.7931	0.28	0.4444	0.4375
TH_1736	3_Junction_2687_Junction_2689_Junction_2733	galectin	chr2L:72977-74901	3_Junction_2687_Junction_2689_Junction_2733:001	0.39831	8.75919	0.1086	0.0221032	20	reads okay	FALSE	CYCLE	#N/A	10	0	38	10	4	2	31	12	10	23	7	20	14	0	0.76	1	0.5714	0.0952	0.5439	0.5455	0.625	0.7931	0.28	0.4444	0.4375
TH_1737	3_Junction_2687_Junction_2689_Junction_2733	galectin	chr2L:72977-74901	3_Junction_2687_Junction_2689_Junction_2733:002	0.652945	18.8821	0.0105	0.108541	24	reads okay	CYCLE	FALSE	#N/A	6.19	0	4	0	1	13	18	5	3	5	9	20	15	0	0.08	0	0.1429	0.619	0.3158	0.2273	0.1875	0.1724	0.36	0.4444	0.4688
TH_1738	3_Junction_2687_Junction_2689_Junction_2733	galectin	chr2L:72977-74901	3_Junction_2687_Junction_2689_Junction_2733:003	0.105741	0.788265	0.7711	1	22.1818	FALSE	FALSE	FALSE	#N/A	10	9	8	0	2	6	8	5	3	1	9	5	3	1	0.16	0	0.2857	0.2857	0.1404	0.2273	0.1875	0.0345	0.36	0.1111	0.0938
TH_2177	3_Junction_6860_Junction_6861	Sin3A	chr2R:8464498-8466632	3_Junction_6860_Junction_6861:001	0.504855	3.06181	0.0339	0.207575	24	reads okay	CYCLE	FALSE	#N/A	10	6	2	0	0	0	24	9	14	8	9	9	5	1	0.6667	0	INF	0	0.4	0.375	0.4828	0.2667	0.36	0.2727	0.2083
TH_2178	3_Junction_6860_Junction_6861	Sin3A	chr2R:8464498-8466632	3_Junction_6860_Junction_6861:002	0.0849116	16.4397	0.6593	1	22.1818	reads okay	FALSE	FALSE	#N/A	10	0	1	12	0	8	36	15	15	22	16	24	19	0	0.3333	1	INF	1	0.6	0.625	0.5172	0.7333	0.64	0.7273	0.7917
TH_241	3_Junction_1181_Junction_1182	CLIP-190	chr2L:17401581-17404059	3_Junction_1181_Junction_1182:001	0.190722	12.3629	0.3907	1	22.1818	reads okay	FALSE	FALSE	#N/A	8.462	5	28	5	0	11	0	0	2	13	9	0	2	0.1613	0.4746	0.3846	INF	0.8462	0	0	0.2222	0.4062	0.6923	0	0.1538
TH_242	3_Junction_1181_Junction_1182	CLIP-190	chr2L:17401581-17404059	3_Junction_1181_Junction_1182:002	0.512512	1.17483	0.0453	0.108541	20	reads okay	CYCLE	FALSE	#N/A	6.50195	26	31	8	0	2	3	4	7	19	4	4	11	0.8387	0.5254	0.6154	INF	0.1538	1	1	0.7778	0.5938	0.3077	1	0.8462
TH_2471	5_Junction_10207_Junction_10208	Pdp1	chr3L:7811323-7846281	5_Junction_10207_Junction_10208:001	0.628821	15.3364	0.0037	0.0498795	24	FALSE	FALSE	FALSE	#N/A	9.091	0	0	0	10	6	0	1	2	9	14	14	6	0	0	0	0.9091	0.6	0	0.0323	0.0833	0.25	0.4	0.3182	0.15
TH_2471	5_Junction_10207_Junction_10208	Pdp1	chr3L:7811323-7846281	5_Junction_10207_Junction_10208:001	0.628821	15.3364	0.0037	0.0498795	24	FALSE	FALSE	FALSE	#N/A	9.091	0	0	0	10	6	0	1	2	9	14	14	6	0	0	0	0.9091	0.6	0	0.0323	0.0833	0.25	0.4	0.3182	0.15
TH_2472	5_Junction_10207_Junction_10208	Pdp1	chr3L:7811323-7846281	5_Junction_10207_Junction_10208:002	0.628821	3.3364	0.0037	0.0498795	24	reads okay	CYCLE	CYCLE	#N/A	11.0011	7	13	6	1	4	42	30	22	27	21	30	34	1	1	1	0.0909	0.4	1	0.9677	0.9167	0.75	0.6	0.6818	0.85
TH_2544	5_Junction_11264_Junction_11265	NPF	chr3R:12435550-12436495	5_Junction_11264_Junction_11265:001	0.410091	22.7959	0.1032	0.0498795	20	reads okay	FALSE	CYCLE	#N/A	2.39981	7	25	0	0	14	5	14	101	0	10	5	46	1	0.6098	INF	INF	0.8235	0.4167	0.7	0.6871	INF	0.7143	1	0.7077
TH_2819	5_Junction_1178_Junction_1179	CLIP-190	chr2L:17401290-17401517	5_Junction_1178_Junction_1179:001	0.343933	15.3472	0.1503	0.551671	24	FALSE	FALSE	FALSE	#N/A	10	0	10	0	3	9	6	5	2	22	5	5	7	0	0.2778	INF	1	0.5625	0.3	0.625	0.6667	0.6111	1	0.8333	0.5
TH_2820	5_Junction_1178_Junction_1179	CLIP-190	chr2L:17401290-17401517	5_Junction_1178_Junction_1179:002	0.623259	1.41144	0.0149	0.0832745	22	reads okay	CYCLE	FALSE	#N/A	10	11	26	0	0	7	14	3	1	14	0	1	7	1	0.7222	INF	0	0.4375	0.7	0.375	0.3333	0.3889	0	0.1667	0.5
TH_3118	5_Junction_14999_Junction_15000	CG42394	chr3R:6677210-6677269	5_Junction_14999_Junction_15000:001	0.520183	20.4635	0.0237	0.108541	24	FALSE	FALSE	FALSE	#N/A	4.737	4	11	0	6	11	9	3	2	0	5	5	6	0.1	0.0659	0	0.1818	0.234	0.4737	0.2143	0.1176	0	0.2273	0.1923	0.1395
TH_3119	5_Junction_14999_Junction_15000	CG42394	chr3R:6677210-6677269	5_Junction_14999_Junction_15000:002	0.520183	8.46351	0.0237	0.108541	24	reads okay	CYCLE	FALSE	#N/A	1.90006	36	156	34	27	36	10	11	15	35	17	21	37	0.9	0.9341	1	0.8182	0.766	0.5263	0.7857	0.8824	1	0.7727	0.8077	0.8605
TH_3498	5_Junction_17132_Junction_17133	dpr8	chrX:14216948-14249494	5_Junction_17132_Junction_17133:001	0.582857	3.34195	0.0145	0.108541	24	reads okay	CYCLE	FALSE	#N/A	10	3	16	0	0	0	7	10	13	2	7	3	6	1	0.8889	INF	0	INF	0.2414	0.4167	0.5	0.1	0.2917	0.1667	0.2609
TH_3499	5_Junction_17132_Junction_17133	dpr8	chrX:14216948-14249494	5_Junction_17132_Junction_17133:002	0.144455	16.4765	0.4758	1	22.1818	reads okay	FALSE	FALSE	#N/A	10	0	2	0	1	0	22	14	13	18	17	15	17	0	0.1111	INF	1	INF	0.7586	0.5833	0.5	0.9	0.7083	0.8333	0.7391
TH_4308	5_Junction_2549_Junction_2550	frj	chr2L:6457916-6458169	5_Junction_2549_Junction_2550:001	0.178959	2.83529	0.3886	0.898239	20	reads okay	FALSE	FALSE	#N/A	7.333	0	11	0	1	0	18	16	26	13	22	15	28	INF	0.7333	0	0.1667	0	0.4	0.5714	0.5098	0.2766	0.4	0.2941	0.6087
TH_4309	5_Junction_2549_Junction_2550	frj	chr2L:6457916-6458169	5_Junction_2549_Junction_2550:002	0.600515	14.3875	0.0167	0.133807	24	reads okay	CYCLE	FALSE	#N/A	3.74953	0	4	11	5	25	27	12	25	34	33	36	18	INF	0.2667	1	0.8333	1	0.6	0.4286	0.4902	0.7234	0.6	0.7059	0.3913
TH_5021	5_Junction_8950_Junction_8951	barc	chr3L:21418645-21425953	5_Junction_8950_Junction_8951:001	0.542936	20.2958	0.0374	0.108541	24	reads okay	CYCLE	FALSE	#N/A	10	0	0	0	0	1	15	9	12	7	10	23	22	INF	0	INF	0	1	1	0.6429	0.4	0.3889	0.4348	0.7419	0.6667
TH_5022	5_Junction_8950_Junction_8951	barc	chr3L:21418645-21425953	5_Junction_8950_Junction_8951:002	0.269796	9.71549	0.2287	1	22.1818	reads okay	FALSE	FALSE	#N/A	10	0	14	0	2	0	0	5	18	11	13	8	11	INF	1	INF	1	0	0	0.3571	0.6	0.6111	0.5652	0.2581	0.3333
TH_537	3_Junction_15603_Junction_15604	toy	chr4:1019319-1024782	3_Junction_15603_Junction_15604:001	0.182362	16.5711	0.4369	0.0498795	24	reads okay	FALSE	CYCLE	#N/A	7.917	0	5	0	2	4	34	54	45	48	76	89	68	INF	0.5556	0	0.6667	0.5714	0.5965	0.551	0.5769	0.6234	0.7917	0.6357	0.5714

## Sheet: Notes
Cycing ALT Splicing Data
1) Each tab represents the different neuron groups analyzed in the study.
2) Each spreadsheet contains the following:
	cycling ID	This is the ID given to each cycling sub-junction
	junction ID	This is the ID given to all the AS events in the analysis. Each set of junctions within the same event will have the same ID.
	gene	Gene in which the AS event takes place
	locataion of longest junction	Coordinates of the longest junction used in the event.
	junction ID	a second junction ID now with numbers denoting how many subjunctions are present in the AS event.
	F24 score	F24 score from fourier analysis
	phase	phase from fourier analysis
	p-value F24	p-value from fourier analysis
	JTK p-valuse	p-value from JTK cycle analysis
	JTK phase	phase from JTK cycle analysis
	>10 reads	filter requiring 10 reads across junctions
	F24 10 cycle	junctions that cycle using Fourier analysis
	JTK 10 cycle	junctions that cycle using JtK cycle analysis
	mRNA cycles	query against database of cycling mRNAs in each neuronal group.
	amplitude (if min is 0 amplitude is Max *10)	amplitude of change in splicing frequency for each junction
	reads 2	reads at timepints for two independent 6TP experiments
	reads 6
	reads 10
	reads 14
	reads 18
	reads 22
	reads 26
	reads 30
	reads 34
	reads 38
	reads 42
	reads 46
	2 percentage usage	% usage at each timepoint in 2 independent six timepoint experiments.
	6 percentage usage
	10 percentage usage
	14 percentage usage
	18 percentage usage
	22 percentage usage
	2 percentage usage
	6 percentage usage
	10 percentage usage
	14 percentage usage
	18 percentage usage
	22 percentage usage
