# Supplementary figures and images for: Striking circadian neuron diversity and cycling of Drosophila alternative splicing
Source: eLife journal article supplement (doi:10.7554/elife.35618), 2018-06-04

Figure 6-figure supplement 3

A

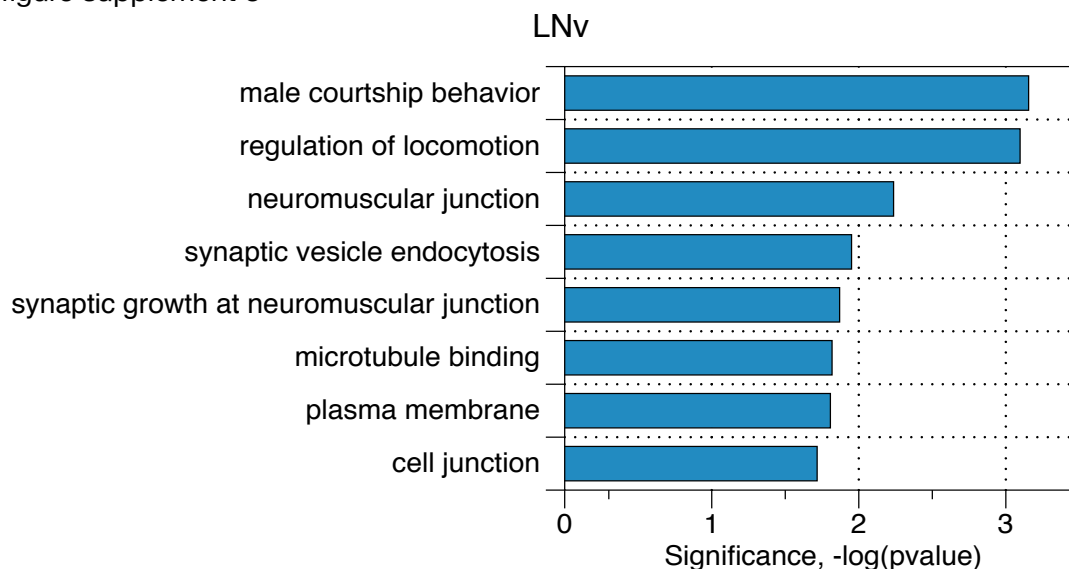

B

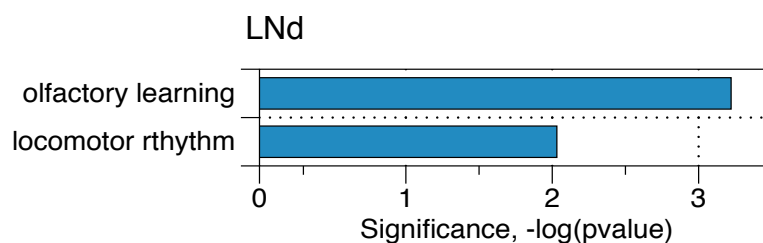

C

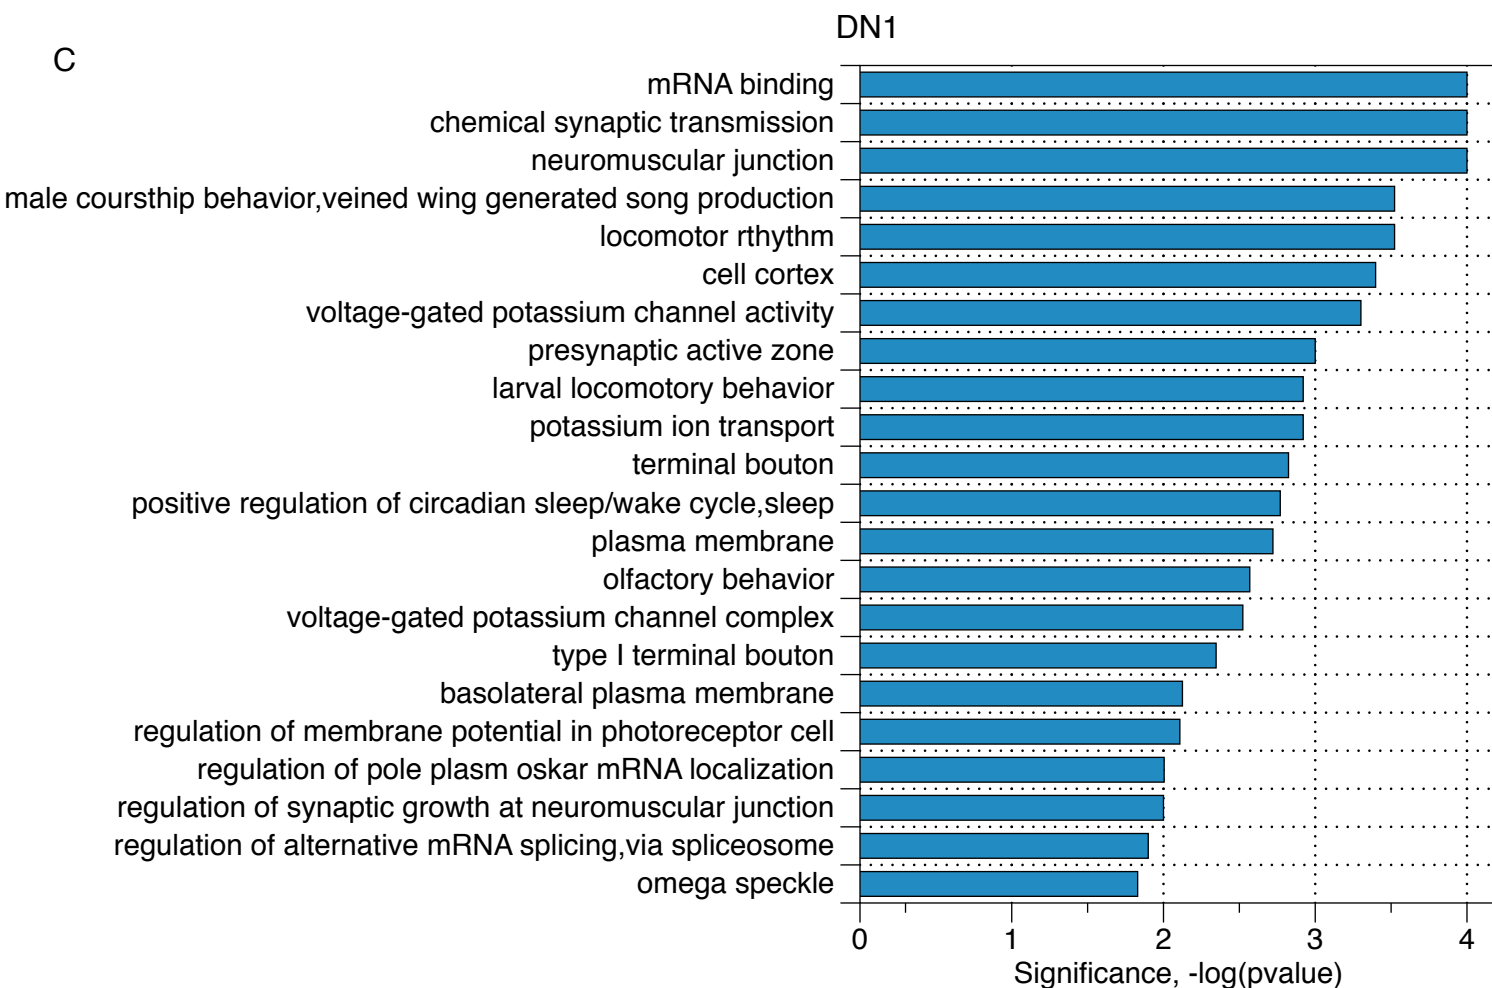

Supplement: supp [file elife-35618-supp-v1.zip]

Figure 3-figure supplement 3

A

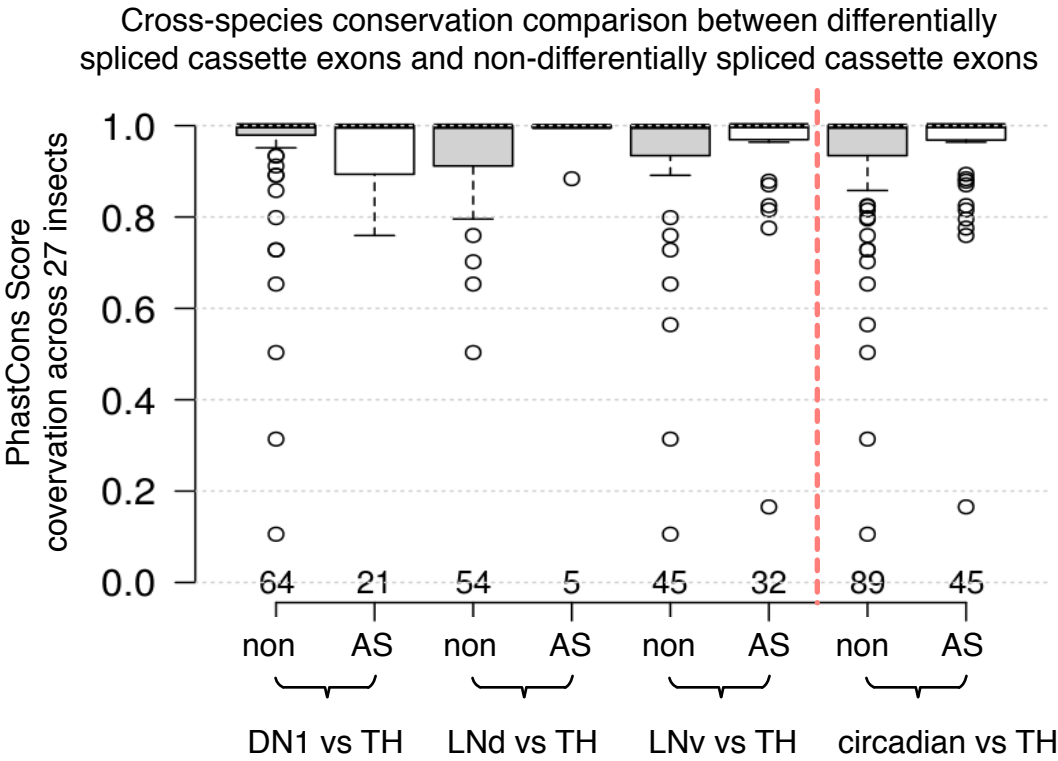

B

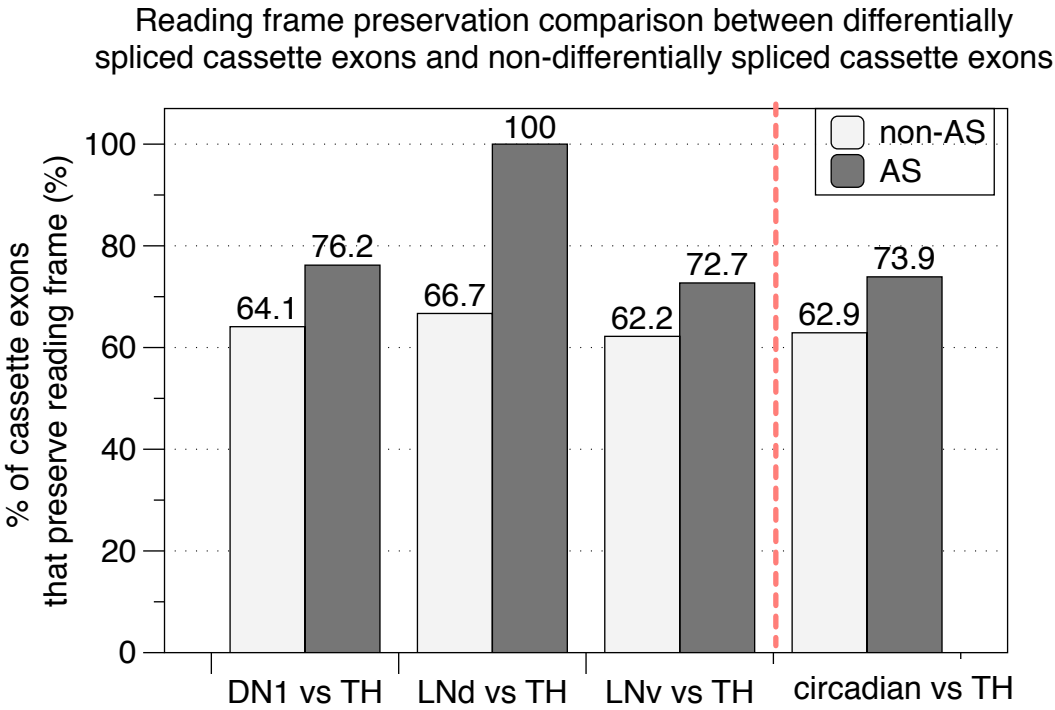

Supplement: supp [file elife-35618-supp-v1.zip]

Figure 1-figure supplement 2

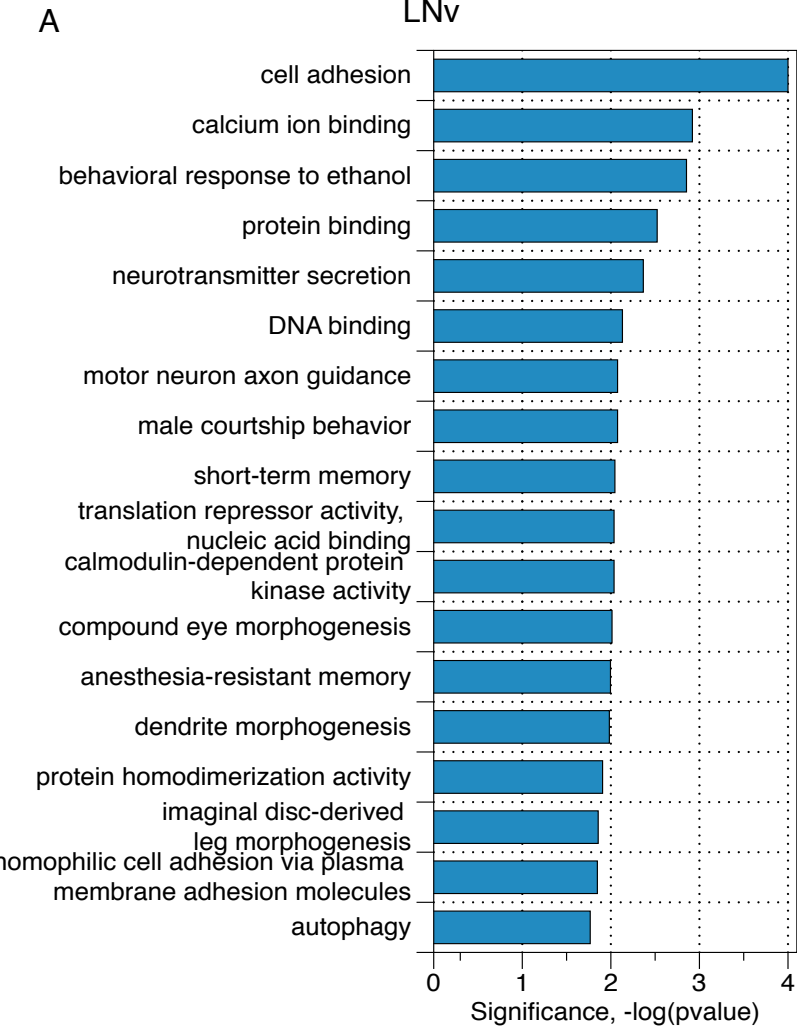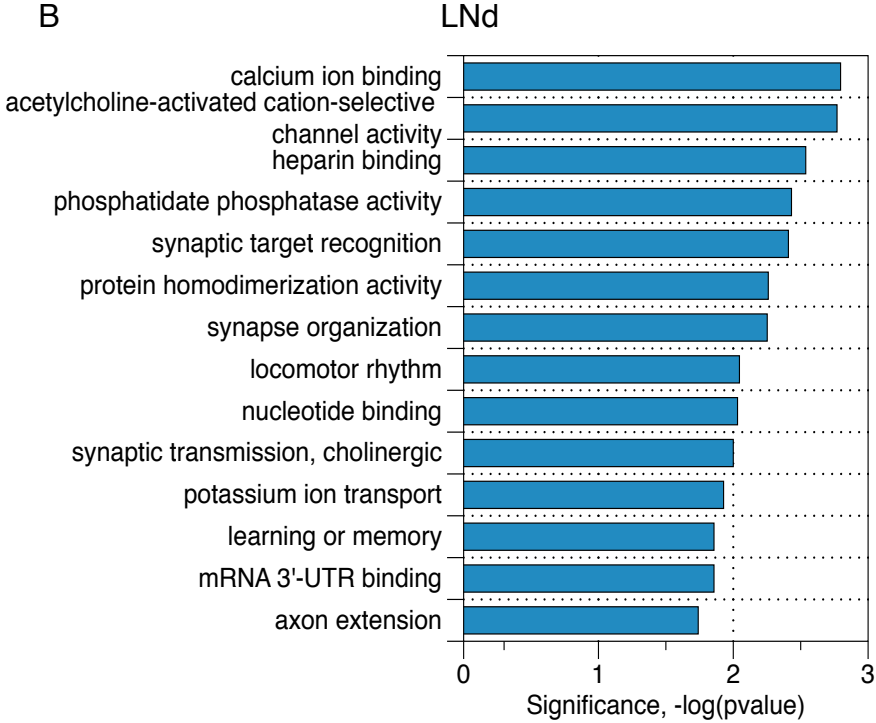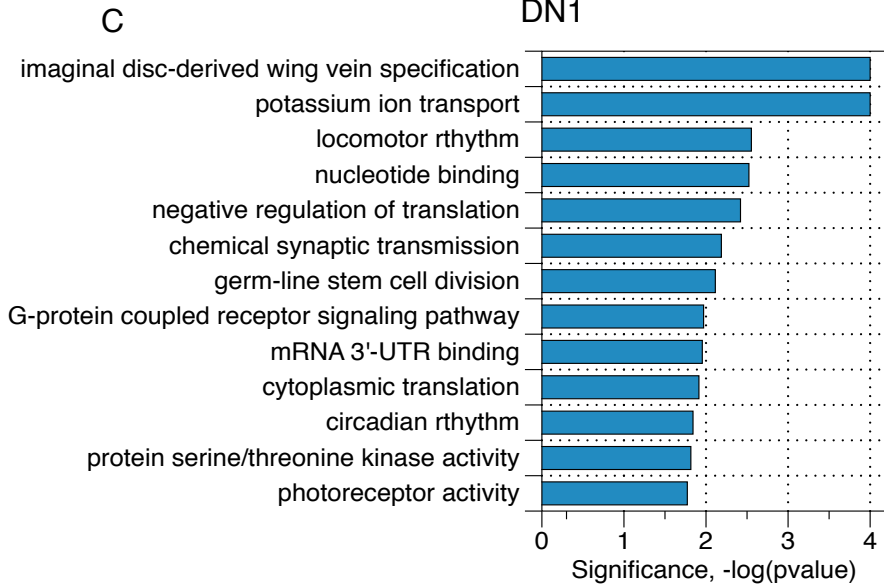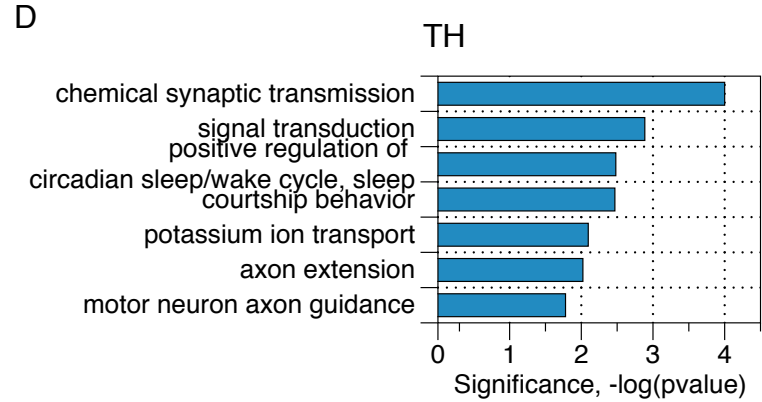

Supplement: supp [file elife-35618-supp-v1.zip]

Figure 6-figure supplement 1

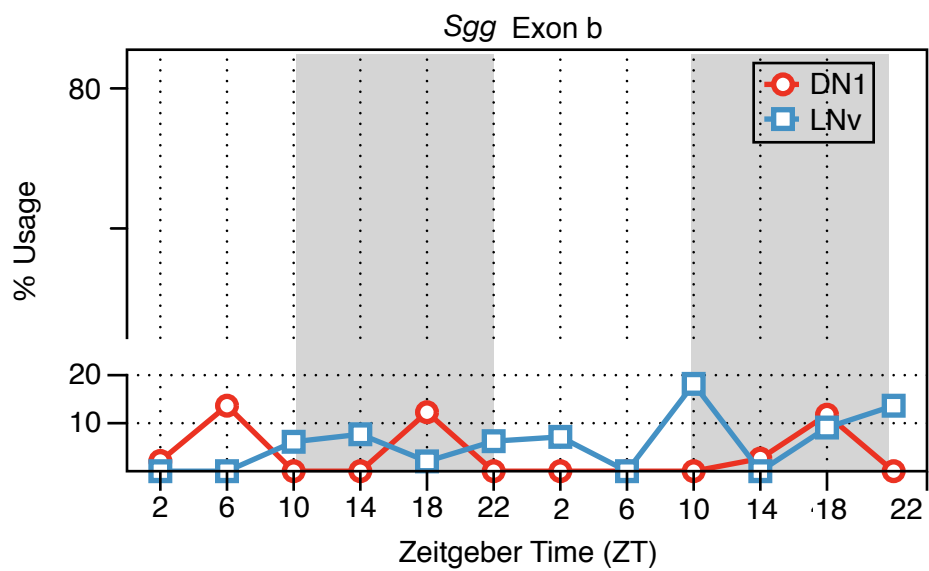

Supplement: supp [file elife-35618-supp-v1.zip]

Figure 7-figure supplement 1

A

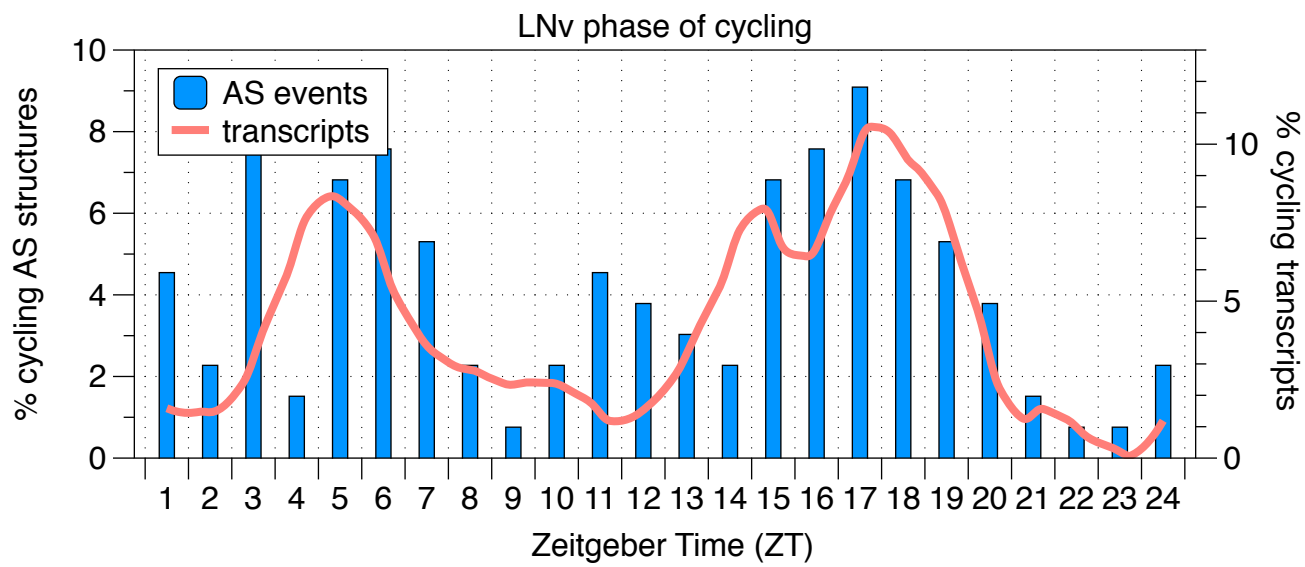

B

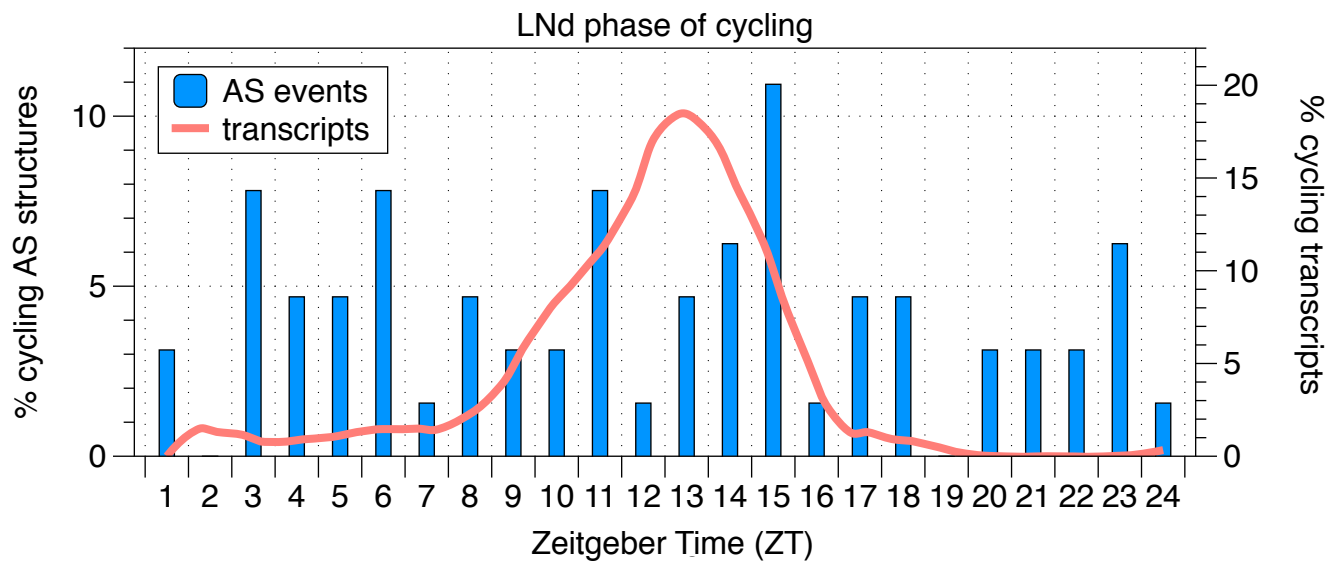

Supplement: supp [file elife-35618-supp-v1.zip]

Figure 3-figure supplement 2

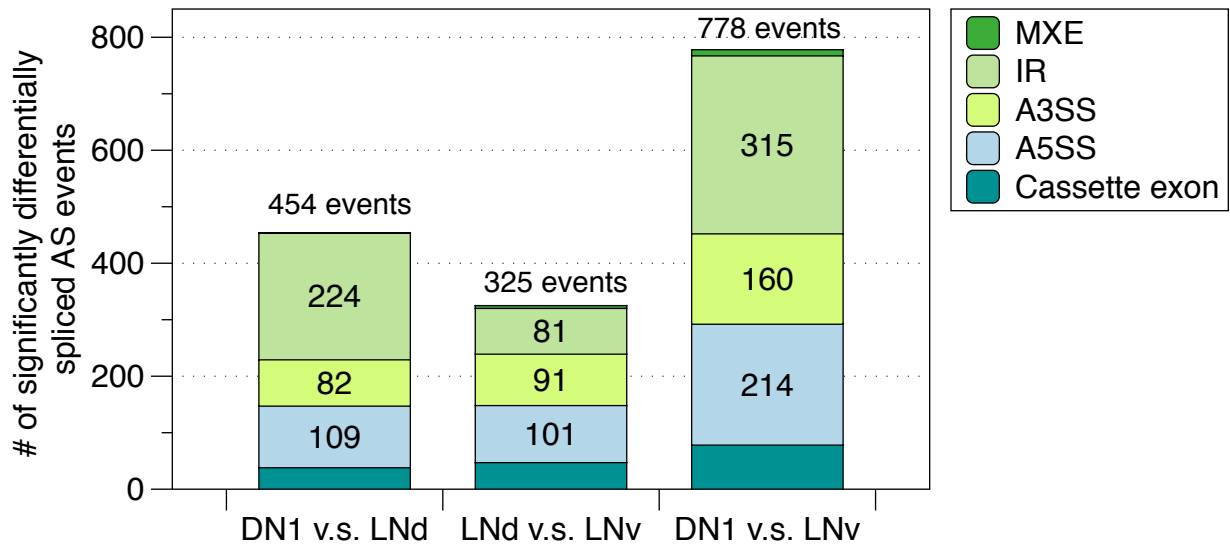

Supplement: supp [file elife-35618-supp-v1.zip]

Figure 3-figure supplement 1

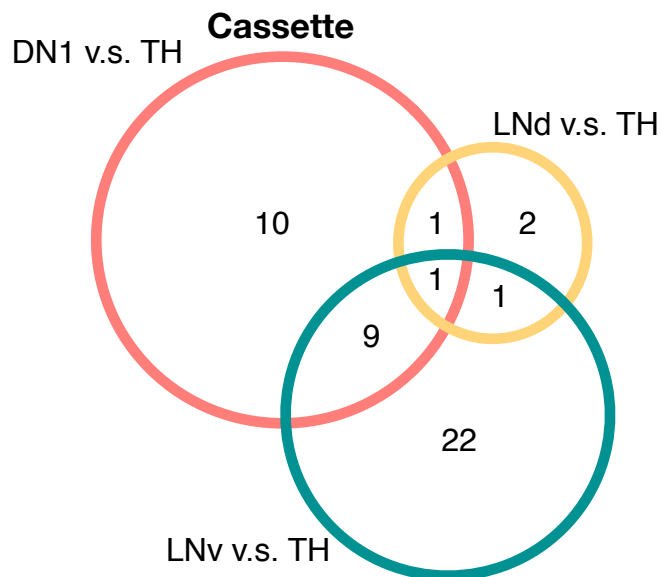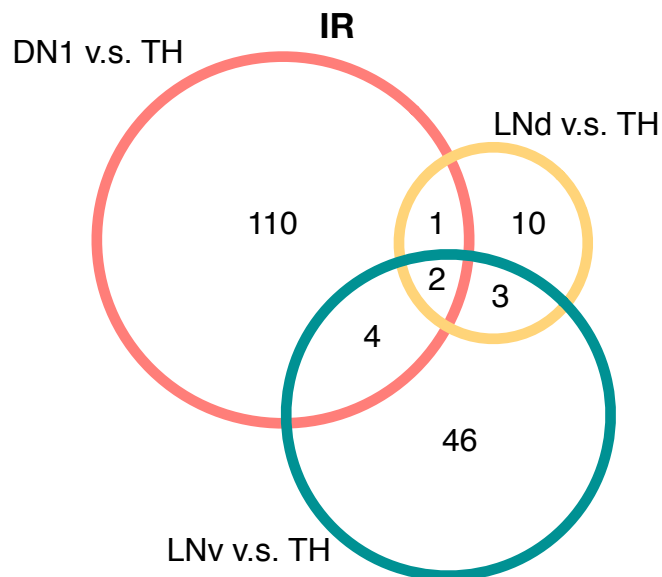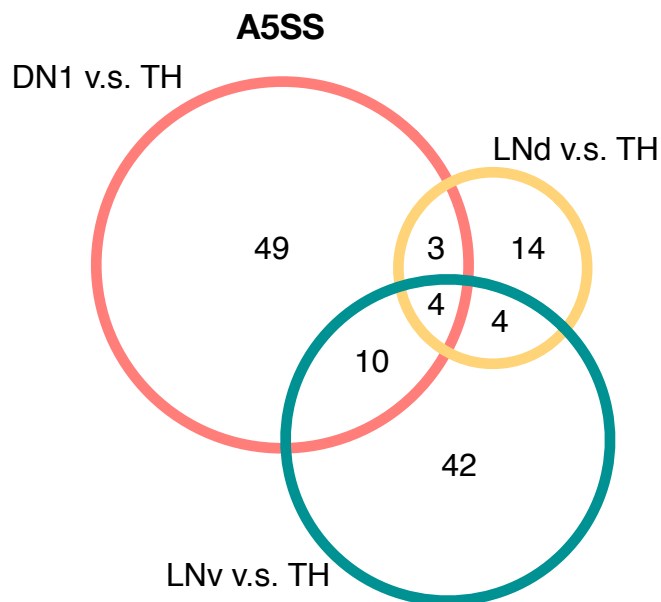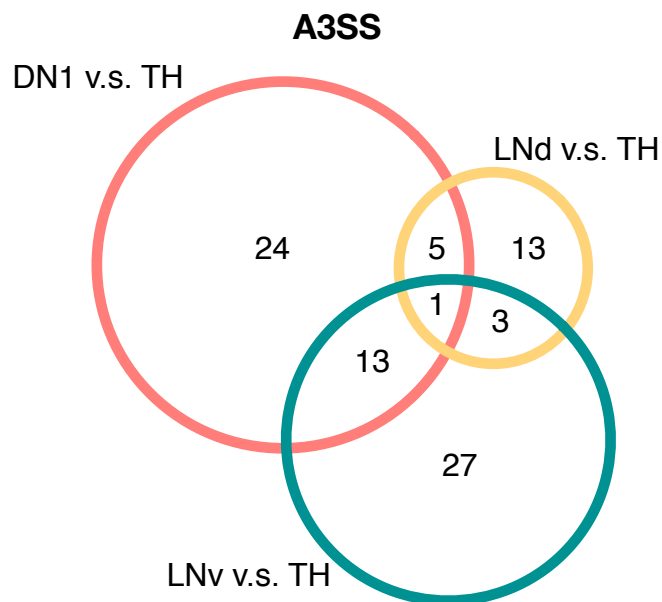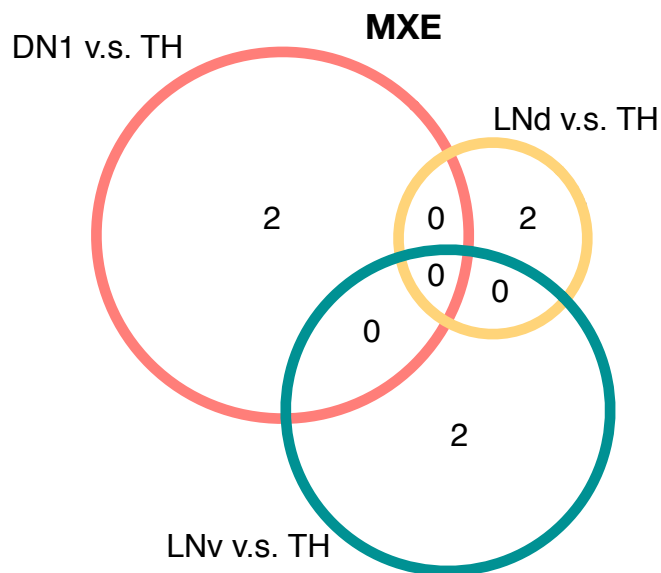

Supplement: supp [file elife-35618-supp-v1.zip › elife_poa_e35618_Figure_3_figure_supplement_1.pdf]

Figure 6-figure supplement 2

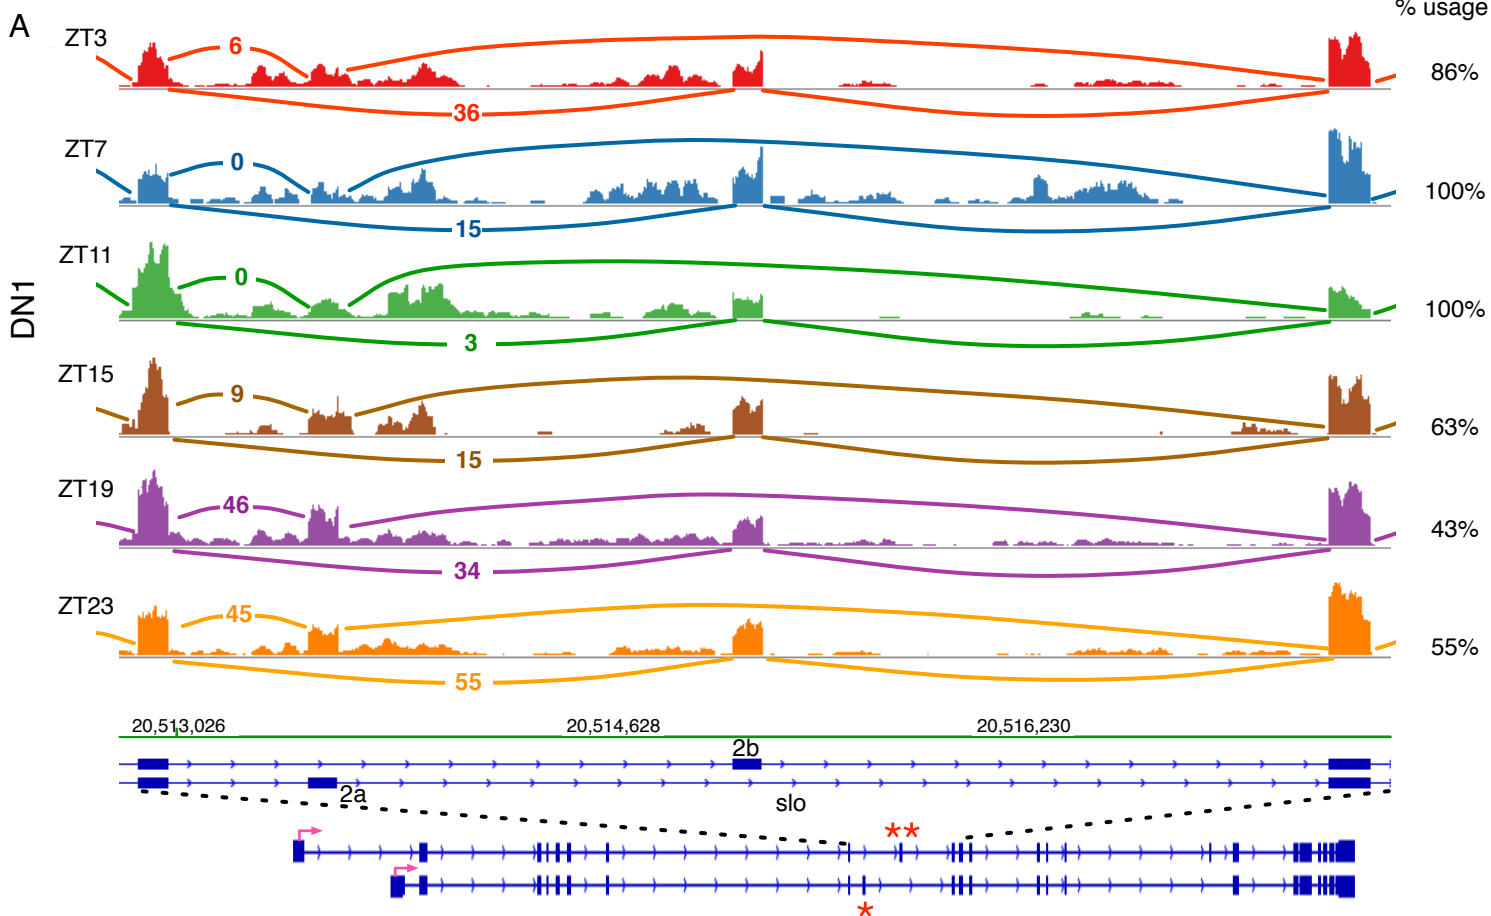

**B**

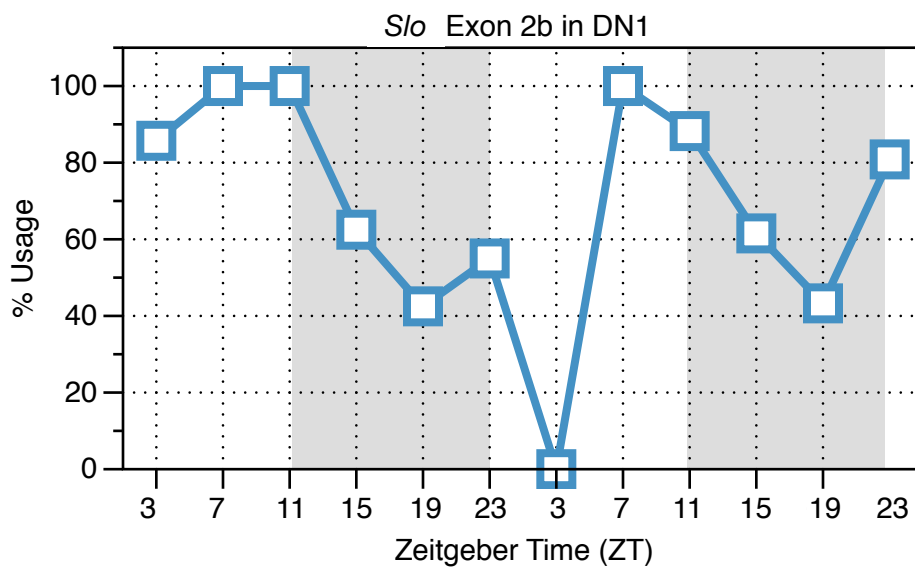

Supplement: supp [file elife-35618-supp-v1.zip › elife_poa_e35618_Figure_6_figure_supplement_2.pdf]

Figure 1-figure supplement 1

A

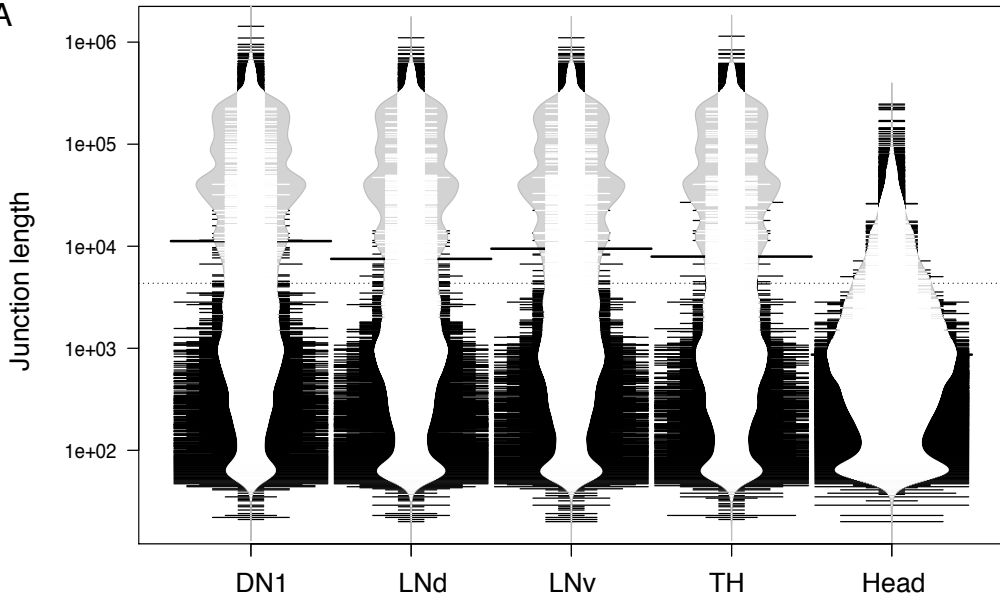

B

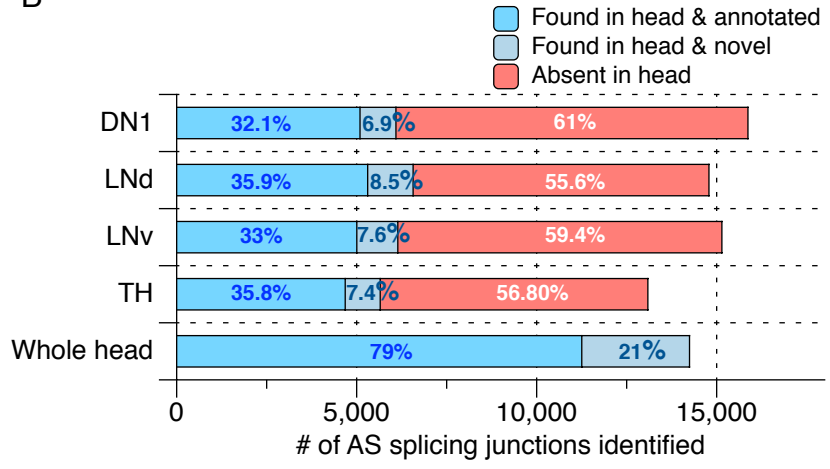

C

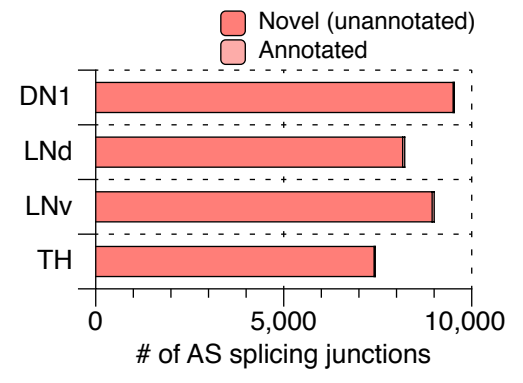

D

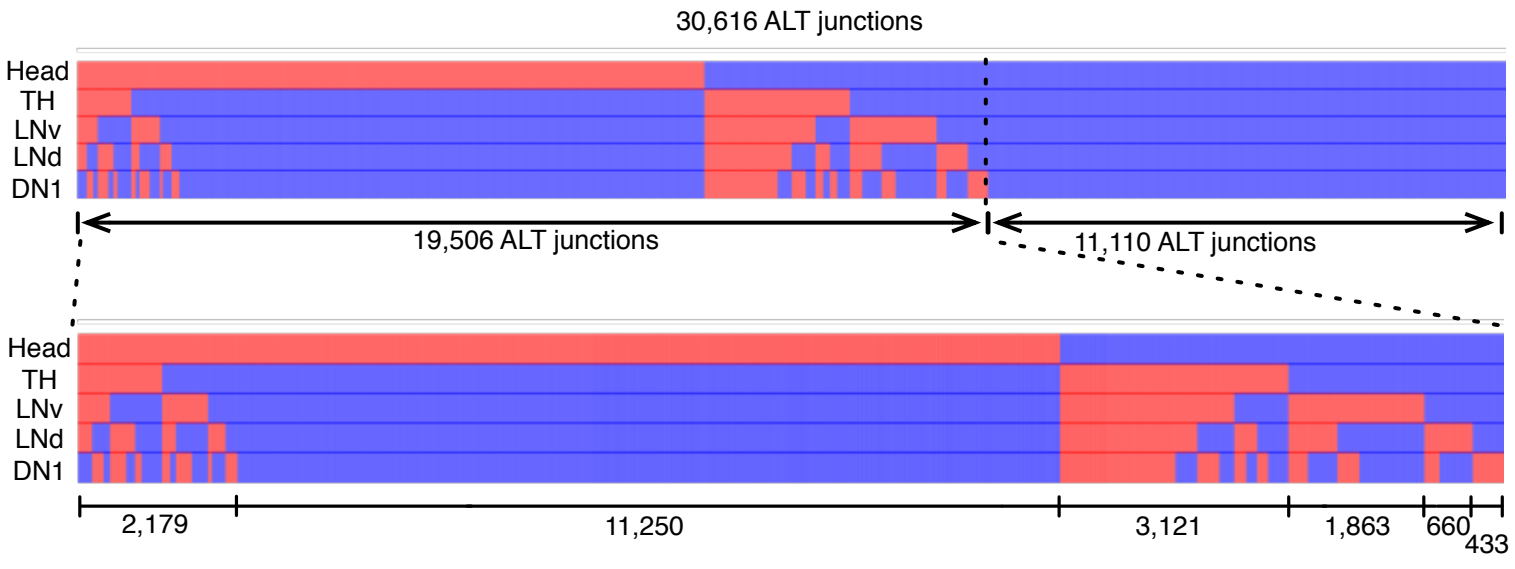

Supplement: supp [file elife-35618-supp-v1.zip › elife_poa_e35618_Figure_1_figure_supplement_1.pdf]
